# Supplementary material for: Analysis of Protein–Protein Functional Associations by Using Gene Ontology and KEGG Pathway
Source: PubMed Central journal article supplement (PMC6668538; doi:10.1155/2019/4963289), 2019-07-18
Supplement: 4963289.f1.pdf [file 4963289.f1.pdf]

**Supplementary Matertal S1. 70392 protein-protein functional associations**

| <b>Ensembl ID of protein 1</b> | <b>Ensembl ID of protein 2</b> |
|--------------------------------|--------------------------------|
| ENSP00000001008                | ENSP00000206249                |
| ENSP00000001008                | ENSP00000216274                |
| ENSP00000001008                | ENSP00000217244                |
| ENSP00000001008                | ENSP00000222247                |
| ENSP00000001008                | ENSP00000222567                |
| ENSP00000001008                | ENSP00000234590                |
| ENSP00000001008                | ENSP00000242057                |
| ENSP00000001008                | ENSP00000246802                |
| ENSP00000001008                | ENSP00000247970                |
| ENSP00000001008                | ENSP00000252487                |
| ENSP00000001008                | ENSP00000254940                |
| ENSP00000001008                | ENSP00000263038                |
| ENSP00000001008                | ENSP00000265963                |
| ENSP00000001008                | ENSP00000265970                |
| ENSP00000001008                | ENSP00000270225                |
| ENSP00000001008                | ENSP00000287878                |
| ENSP00000001008                | ENSP00000300591                |
| ENSP00000001008                | ENSP00000305958                |
| ENSP00000001008                | ENSP00000306999                |
| ENSP00000001008                | ENSP00000313050                |
| ENSP00000001008                | ENSP00000316854                |
| ENSP00000001008                | ENSP00000317992                |
| ENSP00000001008                | ENSP00000322396                |
| ENSP00000001008                | ENSP00000322570                |
| ENSP00000001008                | ENSP00000329466                |
| ENSP00000001008                | ENSP00000332513                |
| ENSP00000001008                | ENSP00000338862                |
| ENSP00000001008                | ENSP00000338990                |
| ENSP00000001008                | ENSP00000339527                |
| ENSP00000001008                | ENSP00000340237                |
| ENSP00000001008                | ENSP00000340820                |
| ENSP00000001008                | ENSP00000348565                |
| ENSP00000001008                | ENSP00000351141                |
| ENSP00000001008                | ENSP00000351697                |
| ENSP00000001008                | ENSP00000352928                |
| ENSP00000001008                | ENSP00000354040                |
| ENSP00000001008                | ENSP00000354812                |
| ENSP00000001008                | ENSP00000359345                |
| ENSP00000001008                | ENSP00000359385                |
| ENSP00000001008                | ENSP00000359688                |
| ENSP00000001008                | ENSP00000360412                |
| ENSP00000001008                | ENSP00000361640                |

|                 |                 |
|-----------------|-----------------|
| ENSP00000001008 | ENSP00000363384 |
| ENSP00000001008 | ENSP00000368349 |
| ENSP00000001008 | ENSP00000370376 |
| ENSP00000001008 | ENSP00000380982 |
| ENSP00000001008 | ENSP00000381657 |
| ENSP00000001008 | ENSP00000382392 |
| ENSP00000001008 | ENSP00000402338 |
| ENSP00000003084 | ENSP00000053867 |
| ENSP00000003084 | ENSP00000216455 |
| ENSP00000003084 | ENSP00000216479 |
| ENSP00000003084 | ENSP00000217244 |
| ENSP00000003084 | ENSP00000219473 |
| ENSP00000003084 | ENSP00000219548 |
| ENSP00000003084 | ENSP00000234160 |
| ENSP00000003084 | ENSP00000241052 |
| ENSP00000003084 | ENSP00000243253 |
| ENSP00000003084 | ENSP00000249647 |
| ENSP00000003084 | ENSP00000254301 |
| ENSP00000003084 | ENSP00000259512 |
| ENSP00000003084 | ENSP00000261247 |
| ENSP00000003084 | ENSP00000261514 |
| ENSP00000003084 | ENSP00000262394 |
| ENSP00000003084 | ENSP00000264380 |
| ENSP00000003084 | ENSP00000265175 |
| ENSP00000003084 | ENSP00000265316 |
| ENSP00000003084 | ENSP00000265717 |
| ENSP00000003084 | ENSP00000281537 |
| ENSP00000003084 | ENSP00000287295 |
| ENSP00000003084 | ENSP00000290649 |
| ENSP00000003084 | ENSP00000296084 |
| ENSP00000003084 | ENSP00000303507 |
| ENSP00000003084 | ENSP00000305958 |
| ENSP00000003084 | ENSP00000306124 |
| ENSP00000003084 | ENSP00000308236 |
| ENSP00000003084 | ENSP00000311344 |
| ENSP00000003084 | ENSP00000311873 |
| ENSP00000003084 | ENSP00000312235 |
| ENSP00000003084 | ENSP00000312506 |
| ENSP00000003084 | ENSP00000313391 |
| ENSP00000003084 | ENSP00000327107 |
| ENSP00000003084 | ENSP00000334061 |
| ENSP00000003084 | ENSP00000340019 |
| ENSP00000003084 | ENSP00000340210 |
| ENSP00000003084 | ENSP00000345530 |
| ENSP00000003084 | ENSP00000347778 |
| ENSP00000003084 | ENSP00000356969 |

|                 |                 |
|-----------------|-----------------|
| ENSP00000003084 | ENSP00000357283 |
| ENSP00000003084 | ENSP00000357484 |
| ENSP00000003084 | ENSP00000358857 |
| ENSP00000003084 | ENSP00000381045 |
| ENSP00000003084 | ENSP00000381863 |
| ENSP00000003084 | ENSP00000392330 |
| ENSP00000003100 | ENSP00000219368 |
| ENSP00000003100 | ENSP00000220584 |
| ENSP00000003100 | ENSP00000227524 |
| ENSP00000003100 | ENSP00000243253 |
| ENSP00000003100 | ENSP00000254521 |
| ENSP00000003100 | ENSP00000255389 |
| ENSP00000003100 | ENSP00000256319 |
| ENSP00000003100 | ENSP00000261507 |
| ENSP00000003100 | ENSP00000261942 |
| ENSP00000003100 | ENSP00000264027 |
| ENSP00000003100 | ENSP00000265896 |
| ENSP00000003100 | ENSP00000272163 |
| ENSP00000003100 | ENSP00000276014 |
| ENSP00000003100 | ENSP00000277010 |
| ENSP00000003100 | ENSP00000312458 |
| ENSP00000003100 | ENSP00000320604 |
| ENSP00000003100 | ENSP00000325425 |
| ENSP00000003100 | ENSP00000325677 |
| ENSP00000003100 | ENSP00000327716 |
| ENSP00000003100 | ENSP00000330812 |
| ENSP00000003100 | ENSP00000336724 |
| ENSP00000003100 | ENSP00000340896 |
| ENSP00000003100 | ENSP00000341662 |
| ENSP00000003100 | ENSP00000344460 |
| ENSP00000003100 | ENSP00000348762 |
| ENSP00000003100 | ENSP00000349877 |
| ENSP00000003100 | ENSP00000355955 |
| ENSP00000003100 | ENSP00000360918 |
| ENSP00000003100 | ENSP00000373918 |
| ENSP00000003302 | ENSP00000007516 |
| ENSP00000003302 | ENSP00000156471 |
| ENSP00000003302 | ENSP00000255194 |
| ENSP00000003302 | ENSP00000261601 |
| ENSP00000003302 | ENSP00000261881 |
| ENSP00000003302 | ENSP00000281708 |
| ENSP00000003302 | ENSP00000290158 |
| ENSP00000003302 | ENSP00000312995 |
| ENSP00000003302 | ENSP00000313490 |
| ENSP00000003302 | ENSP00000330343 |
| ENSP00000003302 | ENSP00000345530 |

|                 |                 |
|-----------------|-----------------|
| ENSP00000003302 | ENSP00000356405 |
| ENSP00000003302 | ENSP00000365588 |
| ENSP00000003302 | ENSP00000366746 |
| ENSP00000003302 | ENSP00000371475 |
| ENSP00000003302 | ENSP00000373060 |
| ENSP00000003302 | ENSP00000378529 |
| ENSP00000003302 | ENSP00000379228 |
| ENSP00000003302 | ENSP00000413520 |
| ENSP00000005226 | ENSP00000252597 |
| ENSP00000005226 | ENSP00000320076 |
| ENSP00000005226 | ENSP00000354951 |
| ENSP00000005340 | ENSP00000212015 |
| ENSP00000005340 | ENSP00000216044 |
| ENSP00000005340 | ENSP00000217244 |
| ENSP00000005340 | ENSP00000217964 |
| ENSP00000005340 | ENSP00000219473 |
| ENSP00000005340 | ENSP00000230419 |
| ENSP00000005340 | ENSP00000243878 |
| ENSP00000005340 | ENSP00000251871 |
| ENSP00000005340 | ENSP00000252137 |
| ENSP00000005340 | ENSP00000254250 |
| ENSP00000005340 | ENSP00000255764 |
| ENSP00000005340 | ENSP00000256379 |
| ENSP00000005340 | ENSP00000256474 |
| ENSP00000005340 | ENSP00000257430 |
| ENSP00000005340 | ENSP00000258648 |
| ENSP00000005340 | ENSP00000261531 |
| ENSP00000005340 | ENSP00000262320 |
| ENSP00000005340 | ENSP00000262457 |
| ENSP00000005340 | ENSP00000262643 |
| ENSP00000005340 | ENSP00000263121 |
| ENSP00000005340 | ENSP00000263205 |
| ENSP00000005340 | ENSP00000264160 |
| ENSP00000005340 | ENSP00000265026 |
| ENSP00000005340 | ENSP00000265175 |
| ENSP00000005340 | ENSP00000265350 |
| ENSP00000005340 | ENSP00000266126 |
| ENSP00000005340 | ENSP00000267064 |
| ENSP00000005340 | ENSP00000268459 |
| ENSP00000005340 | ENSP00000277541 |
| ENSP00000005340 | ENSP00000281928 |
| ENSP00000005340 | ENSP00000286317 |
| ENSP00000005340 | ENSP00000290330 |
| ENSP00000005340 | ENSP00000290663 |
| ENSP00000005340 | ENSP00000292035 |
| ENSP00000005340 | ENSP00000293777 |

|                 |                 |
|-----------------|-----------------|
| ENSP00000005340 | ENSP00000296084 |
| ENSP00000005340 | ENSP00000296215 |
| ENSP00000005340 | ENSP00000296550 |
| ENSP00000005340 | ENSP00000297347 |
| ENSP00000005340 | ENSP00000300574 |
| ENSP00000005340 | ENSP00000301599 |
| ENSP00000005340 | ENSP00000303315 |
| ENSP00000005340 | ENSP00000307863 |
| ENSP00000005340 | ENSP00000308339 |
| ENSP00000005340 | ENSP00000309117 |
| ENSP00000005340 | ENSP00000310800 |
| ENSP00000005340 | ENSP00000311005 |
| ENSP00000005340 | ENSP00000311825 |
| ENSP00000005340 | ENSP00000313391 |
| ENSP00000005340 | ENSP00000315379 |
| ENSP00000005340 | ENSP00000315859 |
| ENSP00000005340 | ENSP00000317985 |
| ENSP00000005340 | ENSP00000319501 |
| ENSP00000005340 | ENSP00000322885 |
| ENSP00000005340 | ENSP00000323720 |
| ENSP00000005340 | ENSP00000325612 |
| ENSP00000005340 | ENSP00000326128 |
| ENSP00000005340 | ENSP00000326767 |
| ENSP00000005340 | ENSP00000334003 |
| ENSP00000005340 | ENSP00000337439 |
| ENSP00000005340 | ENSP00000343129 |
| ENSP00000005340 | ENSP00000344456 |
| ENSP00000005340 | ENSP00000345464 |
| ENSP00000005340 | ENSP00000348550 |
| ENSP00000005340 | ENSP00000349640 |
| ENSP00000005340 | ENSP00000352514 |
| ENSP00000005340 | ENSP00000354911 |
| ENSP00000005340 | ENSP00000355296 |
| ENSP00000005340 | ENSP00000355760 |
| ENSP00000005340 | ENSP00000357047 |
| ENSP00000005340 | ENSP00000357283 |
| ENSP00000005340 | ENSP00000357484 |
| ENSP00000005340 | ENSP00000357907 |
| ENSP00000005340 | ENSP00000358081 |
| ENSP00000005340 | ENSP00000360371 |
| ENSP00000005340 | ENSP00000362948 |
| ENSP00000005340 | ENSP00000363571 |
| ENSP00000005340 | ENSP00000364860 |
| ENSP00000005340 | ENSP00000365530 |
| ENSP00000005340 | ENSP00000367069 |
| ENSP00000005340 | ENSP00000367638 |

|                 |                 |
|-----------------|-----------------|
| ENSP00000005340 | ENSP00000367841 |
| ENSP00000005340 | ENSP00000368678 |
| ENSP00000005340 | ENSP00000368976 |
| ENSP00000005340 | ENSP00000374455 |
| ENSP00000005340 | ENSP00000378180 |
| ENSP00000005340 | ENSP00000381216 |
| ENSP00000005340 | ENSP00000381795 |
| ENSP00000005340 | ENSP00000382423 |
| ENSP00000005340 | ENSP00000383623 |
| ENSP00000005340 | ENSP00000384040 |
| ENSP00000005340 | ENSP00000384048 |
| ENSP00000005340 | ENSP00000392617 |
| ENSP00000005340 | ENSP00000396771 |
| ENSP00000005340 | ENSP00000396976 |
| ENSP00000005340 | ENSP00000399511 |
| ENSP00000005340 | ENSP00000402240 |
| ENSP00000005386 | ENSP00000202017 |
| ENSP00000005386 | ENSP00000215587 |
| ENSP00000005386 | ENSP00000216297 |
| ENSP00000005386 | ENSP00000251038 |
| ENSP00000005386 | ENSP00000262265 |
| ENSP00000005386 | ENSP00000262319 |
| ENSP00000005386 | ENSP00000263857 |
| ENSP00000005386 | ENSP00000264718 |
| ENSP00000005386 | ENSP00000276603 |
| ENSP00000005386 | ENSP00000295121 |
| ENSP00000005386 | ENSP00000312735 |
| ENSP00000005386 | ENSP00000314949 |
| ENSP00000005386 | ENSP00000335321 |
| ENSP00000005386 | ENSP00000337393 |
| ENSP00000005386 | ENSP00000337797 |
| ENSP00000005386 | ENSP00000339109 |
| ENSP00000005386 | ENSP00000345530 |
| ENSP00000005386 | ENSP00000353971 |
| ENSP00000005386 | ENSP00000354558 |
| ENSP00000005386 | ENSP00000356989 |
| ENSP00000005386 | ENSP00000362546 |
| ENSP00000005386 | ENSP00000363734 |
| ENSP00000005386 | ENSP00000364289 |
| ENSP00000005386 | ENSP00000370258 |
| ENSP00000005386 | ENSP00000370589 |
| ENSP00000005386 | ENSP00000376097 |
| ENSP00000005386 | ENSP00000382779 |
| ENSP00000005386 | ENSP00000384048 |
| ENSP00000005386 | ENSP00000385722 |
| ENSP00000006101 | ENSP00000222547 |

|                 |                 |
|-----------------|-----------------|
| ENSP00000006101 | ENSP00000225567 |
| ENSP00000006101 | ENSP00000262812 |
| ENSP00000006101 | ENSP00000264028 |
| ENSP00000006101 | ENSP00000310521 |
| ENSP00000006101 | ENSP00000312735 |
| ENSP00000006101 | ENSP00000325002 |
| ENSP00000006101 | ENSP00000328079 |
| ENSP00000006101 | ENSP00000329419 |
| ENSP00000006101 | ENSP00000344055 |
| ENSP00000006101 | ENSP00000347408 |
| ENSP00000006101 | ENSP00000356530 |
| ENSP00000006101 | ENSP00000357048 |
| ENSP00000006101 | ENSP00000401445 |
| ENSP00000006275 | ENSP00000222008 |
| ENSP00000006275 | ENSP00000283351 |
| ENSP00000006275 | ENSP00000291574 |
| ENSP00000006275 | ENSP00000302783 |
| ENSP00000006275 | ENSP00000305459 |
| ENSP00000006275 | ENSP00000308496 |
| ENSP00000006275 | ENSP00000312318 |
| ENSP00000006275 | ENSP00000314615 |
| ENSP00000006275 | ENSP00000316990 |
| ENSP00000006275 | ENSP00000336606 |
| ENSP00000006275 | ENSP00000343246 |
| ENSP00000006275 | ENSP00000352708 |
| ENSP00000006275 | ENSP00000359000 |
| ENSP00000006275 | ENSP00000360183 |
| ENSP00000006275 | ENSP00000373979 |
| ENSP00000006275 | ENSP00000376871 |
| ENSP00000006275 | ENSP00000397441 |
| ENSP00000006275 | ENSP00000420405 |
| ENSP00000006658 | ENSP00000225916 |
| ENSP00000006658 | ENSP00000264951 |
| ENSP00000006658 | ENSP00000347733 |
| ENSP00000007264 | ENSP00000229395 |
| ENSP00000007264 | ENSP00000230056 |
| ENSP00000007264 | ENSP00000237283 |
| ENSP00000007264 | ENSP00000267807 |
| ENSP00000007264 | ENSP00000271715 |
| ENSP00000007264 | ENSP00000295951 |
| ENSP00000007264 | ENSP00000307567 |
| ENSP00000007264 | ENSP00000323880 |
| ENSP00000007264 | ENSP00000336587 |
| ENSP00000007264 | ENSP00000355890 |
| ENSP00000007264 | ENSP00000362578 |
| ENSP00000007390 | ENSP00000229214 |

|                 |                 |
|-----------------|-----------------|
| ENSP00000007390 | ENSP00000234626 |
| ENSP00000007390 | ENSP00000251038 |
| ENSP00000007390 | ENSP00000260129 |
| ENSP00000007390 | ENSP00000263657 |
| ENSP00000007390 | ENSP00000325448 |
| ENSP00000007390 | ENSP00000391944 |
| ENSP00000007516 | ENSP00000184266 |
| ENSP00000007516 | ENSP00000215565 |
| ENSP00000007516 | ENSP00000216194 |
| ENSP00000007516 | ENSP00000233190 |
| ENSP00000007516 | ENSP00000233627 |
| ENSP00000007516 | ENSP00000237889 |
| ENSP00000007516 | ENSP00000242210 |
| ENSP00000007516 | ENSP00000247866 |
| ENSP00000007516 | ENSP00000251038 |
| ENSP00000007516 | ENSP00000252102 |
| ENSP00000007516 | ENSP00000252711 |
| ENSP00000007516 | ENSP00000259037 |
| ENSP00000007516 | ENSP00000260956 |
| ENSP00000007516 | ENSP00000261643 |
| ENSP00000007516 | ENSP00000262430 |
| ENSP00000007516 | ENSP00000262764 |
| ENSP00000007516 | ENSP00000263774 |
| ENSP00000007516 | ENSP00000265276 |
| ENSP00000007516 | ENSP00000266544 |
| ENSP00000007516 | ENSP00000268668 |
| ENSP00000007516 | ENSP00000274137 |
| ENSP00000007516 | ENSP00000276689 |
| ENSP00000007516 | ENSP00000278618 |
| ENSP00000007516 | ENSP00000280701 |
| ENSP00000007516 | ENSP00000281031 |
| ENSP00000007516 | ENSP00000283429 |
| ENSP00000007516 | ENSP00000290429 |
| ENSP00000007516 | ENSP00000296684 |
| ENSP00000007516 | ENSP00000299166 |
| ENSP00000007516 | ENSP00000301457 |
| ENSP00000007516 | ENSP00000304783 |
| ENSP00000007516 | ENSP00000309463 |
| ENSP00000007516 | ENSP00000311740 |
| ENSP00000007516 | ENSP00000312370 |
| ENSP00000007516 | ENSP00000315774 |
| ENSP00000007516 | ENSP00000317177 |
| ENSP00000007516 | ENSP00000318646 |
| ENSP00000007516 | ENSP00000322450 |
| ENSP00000007516 | ENSP00000327070 |
| ENSP00000007516 | ENSP00000327268 |



|                 |                 |
|-----------------|-----------------|
| ENSP00000007516 | ENSP00000330737 |
| ENSP00000007516 | ENSP00000330787 |
| ENSP00000007516 | ENSP00000330945 |
| ENSP00000007516 | ENSP00000341243 |
| ENSP00000007516 | ENSP00000342793 |
| ENSP00000007516 | ENSP00000346196 |
| ENSP00000007516 | ENSP00000347778 |
| ENSP00000007516 | ENSP00000347988 |
| ENSP00000007516 | ENSP00000354687 |
| ENSP00000007516 | ENSP00000354813 |
| ENSP00000007516 | ENSP00000354876 |
| ENSP00000007516 | ENSP00000354961 |
| ENSP00000007516 | ENSP00000355046 |
| ENSP00000007516 | ENSP00000355206 |
| ENSP00000007516 | ENSP00000355384 |
| ENSP00000007516 | ENSP00000355607 |
| ENSP00000007516 | ENSP00000356972 |
| ENSP00000007516 | ENSP00000360492 |
| ENSP00000007516 | ENSP00000362058 |
| ENSP00000007516 | ENSP00000362873 |
| ENSP00000007516 | ENSP00000363205 |
| ENSP00000007516 | ENSP00000369176 |
| ENSP00000007516 | ENSP00000370930 |
| ENSP00000007516 | ENSP00000377770 |
| ENSP00000007516 | ENSP00000379607 |
| ENSP00000007516 | ENSP00000387262 |
| ENSP00000007516 | ENSP00000392985 |
| ENSP00000007516 | ENSP00000398290 |
| ENSP00000007516 | ENSP00000409315 |
| ENSP00000009530 | ENSP00000310832 |
| ENSP00000009530 | ENSP00000363976 |
| ENSP00000009530 | ENSP00000370023 |
| ENSP00000009530 | ENSP00000378723 |
| ENSP00000009530 | ENSP00000393566 |
| ENSP00000009589 | ENSP00000196551 |
| ENSP00000009589 | ENSP00000199320 |
| ENSP00000009589 | ENSP00000202773 |
| ENSP00000009589 | ENSP00000206249 |
| ENSP00000009589 | ENSP00000211372 |
| ENSP00000009589 | ENSP00000216554 |
| ENSP00000009589 | ENSP00000222008 |
| ENSP00000009589 | ENSP00000222247 |
| ENSP00000009589 | ENSP00000225430 |
| ENSP00000009589 | ENSP00000227524 |
| ENSP00000009589 | ENSP00000230050 |
| ENSP00000009589 | ENSP00000230340 |

|                 |                 |
|-----------------|-----------------|
| ENSP00000009589 | ENSP00000232905 |
| ENSP00000009589 | ENSP00000241600 |
| ENSP00000009589 | ENSP00000245539 |
| ENSP00000009589 | ENSP00000248450 |
| ENSP00000009589 | ENSP00000251038 |
| ENSP00000009589 | ENSP00000253108 |
| ENSP00000009589 | ENSP00000253233 |
| ENSP00000009589 | ENSP00000253788 |
| ENSP00000009589 | ENSP00000254037 |
| ENSP00000009589 | ENSP00000258169 |
| ENSP00000009589 | ENSP00000258455 |
| ENSP00000009589 | ENSP00000260102 |
| ENSP00000009589 | ENSP00000268206 |
| ENSP00000009589 | ENSP00000270625 |
| ENSP00000009589 | ENSP00000272418 |
| ENSP00000009589 | ENSP00000274606 |
| ENSP00000009589 | ENSP00000278572 |
| ENSP00000009589 | ENSP00000280557 |
| ENSP00000009589 | ENSP00000283109 |
| ENSP00000009589 | ENSP00000287878 |
| ENSP00000009589 | ENSP00000295930 |
| ENSP00000009589 | ENSP00000296674 |
| ENSP00000009589 | ENSP00000296802 |
| ENSP00000009589 | ENSP00000296805 |
| ENSP00000009589 | ENSP00000297338 |
| ENSP00000009589 | ENSP00000297908 |
| ENSP00000009589 | ENSP00000301585 |
| ENSP00000009589 | ENSP00000301729 |
| ENSP00000009589 | ENSP00000302896 |
| ENSP00000009589 | ENSP00000311028 |
| ENSP00000009589 | ENSP00000317376 |
| ENSP00000009589 | ENSP00000318646 |
| ENSP00000009589 | ENSP00000319977 |
| ENSP00000009589 | ENSP00000320658 |
| ENSP00000009589 | ENSP00000323687 |
| ENSP00000009589 | ENSP00000323856 |
| ENSP00000009589 | ENSP00000326981 |
| ENSP00000009589 | ENSP00000329715 |
| ENSP00000009589 | ENSP00000331019 |
| ENSP00000009589 | ENSP00000336702 |
| ENSP00000009589 | ENSP00000337127 |
| ENSP00000009589 | ENSP00000339095 |
| ENSP00000009589 | ENSP00000340278 |
| ENSP00000009589 | ENSP00000341885 |
| ENSP00000009589 | ENSP00000345096 |
| ENSP00000009589 | ENSP00000345156 |

|                 |                 |
|-----------------|-----------------|
| ENSP00000009589 | ENSP00000346015 |
| ENSP00000009589 | ENSP00000346022 |
| ENSP00000009589 | ENSP00000346050 |
| ENSP00000009589 | ENSP00000346067 |
| ENSP00000009589 | ENSP00000346725 |
| ENSP00000009589 | ENSP00000352308 |
| ENSP00000009589 | ENSP00000352706 |
| ENSP00000009589 | ENSP00000353059 |
| ENSP00000009589 | ENSP00000355471 |
| ENSP00000009589 | ENSP00000356134 |
| ENSP00000009589 | ENSP00000358120 |
| ENSP00000009589 | ENSP00000358812 |
| ENSP00000009589 | ENSP00000361076 |
| ENSP00000009589 | ENSP00000362036 |
| ENSP00000009589 | ENSP00000362576 |
| ENSP00000009589 | ENSP00000362688 |
| ENSP00000009589 | ENSP00000362744 |
| ENSP00000009589 | ENSP00000363308 |
| ENSP00000009589 | ENSP00000363676 |
| ENSP00000009589 | ENSP00000364119 |
| ENSP00000009589 | ENSP00000364320 |
| ENSP00000009589 | ENSP00000364883 |
| ENSP00000009589 | ENSP00000365588 |
| ENSP00000009589 | ENSP00000368790 |
| ENSP00000009589 | ENSP00000369757 |
| ENSP00000009589 | ENSP00000370023 |
| ENSP00000009589 | ENSP00000372199 |
| ENSP00000009589 | ENSP00000372445 |
| ENSP00000009589 | ENSP00000373060 |
| ENSP00000009589 | ENSP00000379339 |
| ENSP00000009589 | ENSP00000379607 |
| ENSP00000009589 | ENSP00000379888 |
| ENSP00000009589 | ENSP00000380718 |
| ENSP00000009589 | ENSP00000384048 |
| ENSP00000009589 | ENSP00000387429 |
| ENSP00000009589 | ENSP00000393241 |
| ENSP00000009589 | ENSP00000396484 |
| ENSP00000009589 | ENSP00000402338 |
| ENSP00000009589 | ENSP00000403175 |
| ENSP00000009589 | ENSP00000404318 |
| ENSP00000009589 | ENSP00000409167 |
| ENSP00000009589 | ENSP00000412583 |
| ENSP00000009589 | ENSP00000414321 |
| ENSP00000009589 | ENSP00000415212 |
| ENSP00000009589 | ENSP00000416110 |
| ENSP00000009589 | ENSP00000416511 |

|                 |                 |
|-----------------|-----------------|
| ENSP00000009589 | ENSP00000417281 |
| ENSP00000011619 | ENSP00000257430 |
| ENSP00000011619 | ENSP00000266069 |
| ENSP00000011619 | ENSP00000268719 |
| ENSP00000011619 | ENSP00000278715 |
| ENSP00000011619 | ENSP00000294008 |
| ENSP00000011619 | ENSP00000295408 |
| ENSP00000011619 | ENSP00000301962 |
| ENSP00000011619 | ENSP00000302830 |
| ENSP00000011619 | ENSP00000304226 |
| ENSP00000011619 | ENSP00000313059 |
| ENSP00000011619 | ENSP00000315859 |
| ENSP00000011619 | ENSP00000320623 |
| ENSP00000011619 | ENSP00000323527 |
| ENSP00000011619 | ENSP00000347087 |
| ENSP00000011619 | ENSP00000351221 |
| ENSP00000011619 | ENSP00000354201 |
| ENSP00000011619 | ENSP00000355388 |
| ENSP00000011619 | ENSP00000355596 |
| ENSP00000011619 | ENSP00000356405 |
| ENSP00000011619 | ENSP00000357711 |
| ENSP00000011619 | ENSP00000364486 |
| ENSP00000011619 | ENSP00000377865 |
| ENSP00000011619 | ENSP00000384675 |
| ENSP00000011619 | ENSP00000406490 |
| ENSP00000011653 | ENSP00000204566 |
| ENSP00000011653 | ENSP00000219548 |
| ENSP00000011653 | ENSP00000221132 |
| ENSP00000011653 | ENSP00000234590 |
| ENSP00000011653 | ENSP00000273067 |
| ENSP00000011653 | ENSP00000283635 |
| ENSP00000011653 | ENSP00000290158 |
| ENSP00000011653 | ENSP00000291009 |
| ENSP00000011653 | ENSP00000296930 |
| ENSP00000011653 | ENSP00000298229 |
| ENSP00000011653 | ENSP00000302896 |
| ENSP00000011653 | ENSP00000302935 |
| ENSP00000011653 | ENSP00000318195 |
| ENSP00000011653 | ENSP00000325589 |
| ENSP00000011653 | ENSP00000331201 |
| ENSP00000011653 | ENSP00000339795 |
| ENSP00000011653 | ENSP00000340019 |
| ENSP00000011653 | ENSP00000342681 |
| ENSP00000011653 | ENSP00000346067 |
| ENSP00000011653 | ENSP00000346550 |
| ENSP00000011653 | ENSP00000354119 |

|                 |                 |
|-----------------|-----------------|
| ENSP00000011653 | ENSP00000354883 |
| ENSP00000011653 | ENSP00000356346 |
| ENSP00000011653 | ENSP00000358490 |
| ENSP00000011653 | ENSP00000359206 |
| ENSP00000011653 | ENSP00000360798 |
| ENSP00000011653 | ENSP00000363548 |
| ENSP00000011653 | ENSP00000364898 |
| ENSP00000011653 | ENSP00000369293 |
| ENSP00000011653 | ENSP00000393566 |
| ENSP00000012049 | ENSP00000362306 |
| ENSP00000012049 | ENSP00000367029 |
| ENSP00000012049 | ENSP00000386394 |
| ENSP00000012134 | ENSP00000254325 |
| ENSP00000012134 | ENSP00000262643 |
| ENSP00000012134 | ENSP00000264335 |
| ENSP00000012134 | ENSP00000313059 |
| ENSP00000012134 | ENSP00000341243 |
| ENSP00000012134 | ENSP00000359206 |
| ENSP00000012134 | ENSP00000364912 |
| ENSP00000013070 | ENSP00000263805 |
| ENSP00000013807 | ENSP00000055682 |
| ENSP00000013807 | ENSP00000217173 |
| ENSP00000013807 | ENSP00000219066 |
| ENSP00000013807 | ENSP00000219548 |
| ENSP00000013807 | ENSP00000225504 |
| ENSP00000013807 | ENSP00000231790 |
| ENSP00000013807 | ENSP00000233146 |
| ENSP00000013807 | ENSP00000234420 |
| ENSP00000013807 | ENSP00000247815 |
| ENSP00000013807 | ENSP00000251303 |
| ENSP00000013807 | ENSP00000252108 |
| ENSP00000013807 | ENSP00000254719 |
| ENSP00000013807 | ENSP00000256854 |
| ENSP00000013807 | ENSP00000261424 |
| ENSP00000013807 | ENSP00000263187 |
| ENSP00000013807 | ENSP00000263974 |
| ENSP00000013807 | ENSP00000264161 |
| ENSP00000013807 | ENSP00000264926 |
| ENSP00000013807 | ENSP00000265081 |
| ENSP00000013807 | ENSP00000265849 |
| ENSP00000013807 | ENSP00000265963 |
| ENSP00000013807 | ENSP00000265970 |
| ENSP00000013807 | ENSP00000268043 |
| ENSP00000013807 | ENSP00000278412 |
| ENSP00000013807 | ENSP00000278616 |
| ENSP00000013807 | ENSP00000294008 |

|                 |                 |
|-----------------|-----------------|
| ENSP00000013807 | ENSP00000296273 |
| ENSP00000013807 | ENSP00000299424 |
| ENSP00000013807 | ENSP00000301764 |
| ENSP00000013807 | ENSP00000302111 |
| ENSP00000013807 | ENSP00000305790 |
| ENSP00000013807 | ENSP00000307853 |
| ENSP00000013807 | ENSP00000308944 |
| ENSP00000013807 | ENSP00000310520 |
| ENSP00000013807 | ENSP00000311873 |
| ENSP00000013807 | ENSP00000313171 |
| ENSP00000013807 | ENSP00000313420 |
| ENSP00000013807 | ENSP00000314949 |
| ENSP00000013807 | ENSP00000315925 |
| ENSP00000013807 | ENSP00000318977 |
| ENSP00000013807 | ENSP00000322570 |
| ENSP00000013807 | ENSP00000323439 |
| ENSP00000013807 | ENSP00000325863 |
| ENSP00000013807 | ENSP00000328940 |
| ENSP00000013807 | ENSP00000330343 |
| ENSP00000013807 | ENSP00000336606 |
| ENSP00000013807 | ENSP00000336856 |
| ENSP00000013807 | ENSP00000337127 |
| ENSP00000013807 | ENSP00000337353 |
| ENSP00000013807 | ENSP00000343001 |
| ENSP00000013807 | ENSP00000343741 |
| ENSP00000013807 | ENSP00000344537 |
| ENSP00000013807 | ENSP00000347232 |
| ENSP00000013807 | ENSP00000347978 |
| ENSP00000013807 | ENSP00000348020 |
| ENSP00000013807 | ENSP00000348089 |
| ENSP00000013807 | ENSP00000351284 |
| ENSP00000013807 | ENSP00000351697 |
| ENSP00000013807 | ENSP00000352257 |
| ENSP00000013807 | ENSP00000353575 |
| ENSP00000013807 | ENSP00000354522 |
| ENSP00000013807 | ENSP00000354558 |
| ENSP00000013807 | ENSP00000354883 |
| ENSP00000013807 | ENSP00000354957 |
| ENSP00000013807 | ENSP00000355518 |
| ENSP00000013807 | ENSP00000356989 |
| ENSP00000013807 | ENSP00000357402 |
| ENSP00000013807 | ENSP00000358478 |
| ENSP00000013807 | ENSP00000360532 |
| ENSP00000013807 | ENSP00000362441 |
| ENSP00000013807 | ENSP00000364126 |
| ENSP00000013807 | ENSP00000364270 |

|                 |                 |
|-----------------|-----------------|
| ENSP00000013807 | ENSP00000367910 |
| ENSP00000013807 | ENSP00000368349 |
| ENSP00000013807 | ENSP00000369411 |
| ENSP00000013807 | ENSP00000370151 |
| ENSP00000013807 | ENSP00000380504 |
| ENSP00000013807 | ENSP00000394649 |
| ENSP00000013807 | ENSP00000406490 |
| ENSP00000013807 | ENSP00000406868 |
| ENSP00000013807 | ENSP00000407047 |
| ENSP00000016171 | ENSP00000251038 |
| ENSP00000016171 | ENSP00000255390 |
| ENSP00000016171 | ENSP00000261643 |
| ENSP00000016171 | ENSP00000268379 |
| ENSP00000016171 | ENSP00000299335 |
| ENSP00000016171 | ENSP00000326579 |
| ENSP00000016171 | ENSP00000346015 |
| ENSP00000016171 | ENSP00000353073 |
| ENSP00000016171 | ENSP00000360782 |
| ENSP00000016171 | ENSP00000361042 |
| ENSP00000016171 | ENSP00000369335 |
| ENSP00000016171 | ENSP00000387262 |
| ENSP00000019317 | ENSP00000162749 |
| ENSP00000019317 | ENSP00000222792 |
| ENSP00000019317 | ENSP00000232458 |
| ENSP00000019317 | ENSP00000242719 |
| ENSP00000019317 | ENSP00000249923 |
| ENSP00000019317 | ENSP00000255194 |
| ENSP00000019317 | ENSP00000256442 |
| ENSP00000019317 | ENSP00000256658 |
| ENSP00000019317 | ENSP00000258062 |
| ENSP00000019317 | ENSP00000263795 |
| ENSP00000019317 | ENSP00000301838 |
| ENSP00000019317 | ENSP00000311005 |
| ENSP00000019317 | ENSP00000314499 |
| ENSP00000019317 | ENSP00000316845 |
| ENSP00000019317 | ENSP00000322957 |
| ENSP00000019317 | ENSP00000334836 |
| ENSP00000019317 | ENSP00000344055 |
| ENSP00000019317 | ENSP00000347169 |
| ENSP00000019317 | ENSP00000348349 |
| ENSP00000019317 | ENSP00000348550 |
| ENSP00000019317 | ENSP00000349824 |
| ENSP00000019317 | ENSP00000349959 |
| ENSP00000019317 | ENSP00000350199 |
| ENSP00000019317 | ENSP00000351926 |
| ENSP00000019317 | ENSP00000352603 |

|                 |                 |
|-----------------|-----------------|
| ENSP00000019317 | ENSP00000354927 |
| ENSP00000019317 | ENSP00000359067 |
| ENSP00000019317 | ENSP00000365005 |
| ENSP00000019317 | ENSP00000366121 |
| ENSP00000019317 | ENSP00000379612 |
| ENSP00000019317 | ENSP00000379709 |
| ENSP00000019317 | ENSP00000386456 |
| ENSP00000019317 | ENSP00000391249 |
| ENSP00000019317 | ENSP00000394794 |
| ENSP00000020926 | ENSP00000216492 |
| ENSP00000020926 | ENSP00000368244 |
| ENSP00000023939 | ENSP00000270708 |
| ENSP00000023939 | ENSP00000368438 |
| ENSP00000025008 | ENSP00000240079 |
| ENSP00000025008 | ENSP00000254101 |
| ENSP00000025008 | ENSP00000254719 |
| ENSP00000025008 | ENSP00000256474 |
| ENSP00000025008 | ENSP00000258947 |
| ENSP00000025008 | ENSP00000263121 |
| ENSP00000025008 | ENSP00000288199 |
| ENSP00000025008 | ENSP00000288828 |
| ENSP00000025008 | ENSP00000296679 |
| ENSP00000025008 | ENSP00000315702 |
| ENSP00000025008 | ENSP00000324560 |
| ENSP00000025008 | ENSP00000329967 |
| ENSP00000025008 | ENSP00000334675 |
| ENSP00000025008 | ENSP00000338990 |
| ENSP00000025008 | ENSP00000341189 |
| ENSP00000025008 | ENSP00000349785 |
| ENSP00000025008 | ENSP00000351250 |
| ENSP00000025008 | ENSP00000351908 |
| ENSP00000025008 | ENSP00000353375 |
| ENSP00000025008 | ENSP00000354777 |
| ENSP00000025008 | ENSP00000357907 |
| ENSP00000025008 | ENSP00000363205 |
| ENSP00000025008 | ENSP00000367029 |
| ENSP00000025008 | ENSP00000367797 |
| ENSP00000025008 | ENSP00000369339 |
| ENSP00000025008 | ENSP00000385025 |
| ENSP00000025008 | ENSP00000392896 |
| ENSP00000025301 | ENSP00000265717 |
| ENSP00000025301 | ENSP00000294008 |
| ENSP00000026218 | ENSP00000216452 |
| ENSP00000026218 | ENSP00000251968 |
| ENSP00000026218 | ENSP00000278616 |
| ENSP00000026218 | ENSP00000310842 |



|                 |                 |
|-----------------|-----------------|
| ENSP00000026218 | ENSP00000312458 |
| ENSP00000026218 | ENSP00000354560 |
| ENSP00000026218 | ENSP00000369820 |
| ENSP00000026218 | ENSP00000420037 |
| ENSP00000035383 | ENSP00000252699 |
| ENSP00000035383 | ENSP00000258418 |
| ENSP00000035383 | ENSP00000273666 |
| ENSP00000035383 | ENSP00000307134 |
| ENSP00000035383 | ENSP00000312318 |
| ENSP00000035383 | ENSP00000339952 |
| ENSP00000035383 | ENSP00000368824 |
| ENSP00000037502 | ENSP00000162749 |
| ENSP00000037502 | ENSP00000234590 |
| ENSP00000037502 | ENSP00000252999 |
| ENSP00000037502 | ENSP00000254301 |
| ENSP00000037502 | ENSP00000257879 |
| ENSP00000037502 | ENSP00000261424 |
| ENSP00000037502 | ENSP00000302830 |
| ENSP00000037502 | ENSP00000322273 |
| ENSP00000037502 | ENSP00000336927 |
| ENSP00000037502 | ENSP00000339933 |
| ENSP00000037502 | ENSP00000346839 |
| ENSP00000037869 | ENSP00000310596 |
| ENSP00000039007 | ENSP00000225916 |
| ENSP00000039007 | ENSP00000231706 |
| ENSP00000039007 | ENSP00000261783 |
| ENSP00000039007 | ENSP00000318318 |
| ENSP00000039007 | ENSP00000318351 |
| ENSP00000039007 | ENSP00000332444 |
| ENSP00000039007 | ENSP00000358423 |
| ENSP00000039007 | ENSP00000364986 |
| ENSP00000040663 | ENSP00000256897 |
| ENSP00000040663 | ENSP00000304668 |
| ENSP00000040663 | ENSP00000319531 |
| ENSP00000040663 | ENSP00000378350 |
| ENSP00000040738 | ENSP00000360916 |
| ENSP00000040738 | ENSP00000379607 |
| ENSP00000040877 | ENSP00000220669 |
| ENSP00000040877 | ENSP00000254803 |
| ENSP00000040877 | ENSP00000256216 |
| ENSP00000040877 | ENSP00000260102 |
| ENSP00000040877 | ENSP00000263629 |
| ENSP00000040877 | ENSP00000290429 |
| ENSP00000040877 | ENSP00000300648 |
| ENSP00000040877 | ENSP00000307491 |
| ENSP00000040877 | ENSP00000311984 |

|                 |                 |
|-----------------|-----------------|
| ENSP00000040877 | ENSP00000314441 |
| ENSP00000040877 | ENSP00000321711 |
| ENSP00000040877 | ENSP00000324956 |
| ENSP00000040877 | ENSP00000326981 |
| ENSP00000040877 | ENSP00000334538 |
| ENSP00000040877 | ENSP00000339532 |
| ENSP00000040877 | ENSP00000341082 |
| ENSP00000040877 | ENSP00000344460 |
| ENSP00000040877 | ENSP00000346015 |
| ENSP00000040877 | ENSP00000348877 |
| ENSP00000040877 | ENSP00000358812 |
| ENSP00000040877 | ENSP00000360286 |
| ENSP00000040877 | ENSP00000371155 |
| ENSP00000040877 | ENSP00000388275 |
| ENSP00000043402 | ENSP00000172229 |
| ENSP00000043402 | ENSP00000247271 |
| ENSP00000043402 | ENSP00000258418 |
| ENSP00000043402 | ENSP00000267484 |
| ENSP00000043402 | ENSP00000337838 |
| ENSP00000043402 | ENSP00000347451 |
| ENSP00000043402 | ENSP00000358059 |
| ENSP00000046794 | ENSP00000085219 |
| ENSP00000046794 | ENSP00000220597 |
| ENSP00000046794 | ENSP00000226951 |
| ENSP00000046794 | ENSP00000233154 |
| ENSP00000046794 | ENSP00000244007 |
| ENSP00000046794 | ENSP00000263881 |
| ENSP00000046794 | ENSP00000264122 |
| ENSP00000046794 | ENSP00000295756 |
| ENSP00000046794 | ENSP00000308774 |
| ENSP00000046794 | ENSP00000313059 |
| ENSP00000046794 | ENSP00000316460 |
| ENSP00000046794 | ENSP00000339186 |
| ENSP00000046794 | ENSP00000354119 |
| ENSP00000046794 | ENSP00000356346 |
| ENSP00000046794 | ENSP00000360916 |
| ENSP00000046794 | ENSP00000364898 |
| ENSP00000046794 | ENSP00000365891 |
| ENSP00000046794 | ENSP00000366746 |
| ENSP00000046794 | ENSP00000366936 |
| ENSP00000053243 | ENSP00000365048 |
| ENSP00000053468 | ENSP00000081029 |
| ENSP00000053468 | ENSP00000196551 |
| ENSP00000053468 | ENSP00000241600 |
| ENSP00000053468 | ENSP00000245539 |
| ENSP00000053468 | ENSP00000251038 |

|                 |                 |
|-----------------|-----------------|
| ENSP00000053468 | ENSP00000254037 |
| ENSP00000053468 | ENSP00000258455 |
| ENSP00000053468 | ENSP00000272418 |
| ENSP00000053468 | ENSP00000295491 |
| ENSP00000053468 | ENSP00000301585 |
| ENSP00000053468 | ENSP00000337127 |
| ENSP00000053468 | ENSP00000341692 |
| ENSP00000053468 | ENSP00000347087 |
| ENSP00000053468 | ENSP00000352706 |
| ENSP00000053468 | ENSP00000361206 |
| ENSP00000053468 | ENSP00000362036 |
| ENSP00000053468 | ENSP00000362208 |
| ENSP00000053468 | ENSP00000362576 |
| ENSP00000053468 | ENSP00000372445 |
| ENSP00000053867 | ENSP00000222254 |
| ENSP00000053867 | ENSP00000254101 |
| ENSP00000053867 | ENSP00000262238 |
| ENSP00000053867 | ENSP00000292432 |
| ENSP00000053867 | ENSP00000343246 |
| ENSP00000053867 | ENSP00000348234 |
| ENSP00000053867 | ENSP00000350249 |
| ENSP00000053867 | ENSP00000360060 |
| ENSP00000053867 | ENSP00000363827 |
| ENSP00000053867 | ENSP00000364814 |
| ENSP00000053867 | ENSP00000379607 |
| ENSP00000054668 | ENSP00000323516 |
| ENSP00000054668 | ENSP00000379607 |
| ENSP00000054950 | ENSP00000221566 |
| ENSP00000054950 | ENSP00000244769 |
| ENSP00000054950 | ENSP00000336702 |
| ENSP00000054950 | ENSP00000348163 |
| ENSP00000054950 | ENSP00000357998 |
| ENSP00000054950 | ENSP00000363055 |
| ENSP00000054950 | ENSP00000370557 |
| ENSP00000054950 | ENSP00000391944 |
| ENSP00000055335 | ENSP00000216392 |
| ENSP00000055335 | ENSP00000317904 |
| ENSP00000055335 | ENSP00000396452 |
| ENSP00000055682 | ENSP00000216367 |
| ENSP00000055682 | ENSP00000219066 |
| ENSP00000055682 | ENSP00000221486 |
| ENSP00000055682 | ENSP00000222673 |
| ENSP00000055682 | ENSP00000234626 |
| ENSP00000055682 | ENSP00000241436 |
| ENSP00000055682 | ENSP00000254942 |
| ENSP00000055682 | ENSP00000263642 |

|                 |                 |
|-----------------|-----------------|
| ENSP00000055682 | ENSP00000264926 |
| ENSP00000055682 | ENSP00000267430 |
| ENSP00000055682 | ENSP00000268124 |
| ENSP00000055682 | ENSP00000269214 |
| ENSP00000055682 | ENSP00000276072 |
| ENSP00000055682 | ENSP00000276603 |
| ENSP00000055682 | ENSP00000285021 |
| ENSP00000055682 | ENSP00000290949 |
| ENSP00000055682 | ENSP00000294053 |
| ENSP00000055682 | ENSP00000306999 |
| ENSP00000055682 | ENSP00000308944 |
| ENSP00000055682 | ENSP00000310520 |
| ENSP00000055682 | ENSP00000311873 |
| ENSP00000055682 | ENSP00000313350 |
| ENSP00000055682 | ENSP00000315700 |
| ENSP00000055682 | ENSP00000322570 |
| ENSP00000055682 | ENSP00000336606 |
| ENSP00000055682 | ENSP00000340305 |
| ENSP00000055682 | ENSP00000340879 |
| ENSP00000055682 | ENSP00000343392 |
| ENSP00000055682 | ENSP00000349393 |
| ENSP00000055682 | ENSP00000351284 |
| ENSP00000055682 | ENSP00000352257 |
| ENSP00000055682 | ENSP00000355185 |
| ENSP00000055682 | ENSP00000358576 |
| ENSP00000055682 | ENSP00000360116 |
| ENSP00000055682 | ENSP00000361310 |
| ENSP00000055682 | ENSP00000364126 |
| ENSP00000055682 | ENSP00000364270 |
| ENSP00000055682 | ENSP00000367527 |
| ENSP00000055682 | ENSP00000368349 |
| ENSP00000055682 | ENSP00000368438 |
| ENSP00000055682 | ENSP00000369335 |
| ENSP00000055682 | ENSP00000370150 |
| ENSP00000055682 | ENSP00000370151 |
| ENSP00000055682 | ENSP00000370222 |
| ENSP00000055682 | ENSP00000370376 |
| ENSP00000055682 | ENSP00000371475 |
| ENSP00000055682 | ENSP00000375809 |
| ENSP00000055682 | ENSP00000381657 |
| ENSP00000056217 | ENSP00000222308 |
| ENSP00000056217 | ENSP00000237380 |
| ENSP00000056217 | ENSP00000243776 |
| ENSP00000056217 | ENSP00000244007 |
| ENSP00000056217 | ENSP00000262643 |
| ENSP00000056217 | ENSP00000342112 |

|                 |                 |
|-----------------|-----------------|
| ENSP00000056217 | ENSP00000349877 |
| ENSP00000062104 | ENSP00000345464 |
| ENSP00000064780 | ENSP00000348278 |
| ENSP00000070846 | ENSP00000261590 |
| ENSP00000070846 | ENSP00000312356 |
| ENSP00000070846 | ENSP00000344456 |
| ENSP00000070846 | ENSP00000359531 |
| ENSP00000072869 | ENSP00000251038 |
| ENSP00000072869 | ENSP00000254759 |
| ENSP00000072869 | ENSP00000262507 |
| ENSP00000072869 | ENSP00000264951 |
| ENSP00000072869 | ENSP00000268124 |
| ENSP00000072869 | ENSP00000288532 |
| ENSP00000072869 | ENSP00000300452 |
| ENSP00000072869 | ENSP00000312587 |
| ENSP00000072869 | ENSP00000322316 |
| ENSP00000072869 | ENSP00000333946 |
| ENSP00000072869 | ENSP00000348877 |
| ENSP00000072869 | ENSP00000358033 |
| ENSP00000072869 | ENSP00000371607 |
| ENSP00000078527 | ENSP00000251038 |
| ENSP00000081029 | ENSP00000196551 |
| ENSP00000081029 | ENSP00000206249 |
| ENSP00000081029 | ENSP00000211372 |
| ENSP00000081029 | ENSP00000241600 |
| ENSP00000081029 | ENSP00000245539 |
| ENSP00000081029 | ENSP00000254037 |
| ENSP00000081029 | ENSP00000258455 |
| ENSP00000081029 | ENSP00000272418 |
| ENSP00000081029 | ENSP00000288937 |
| ENSP00000081029 | ENSP00000295491 |
| ENSP00000081029 | ENSP00000296509 |
| ENSP00000081029 | ENSP00000301585 |
| ENSP00000081029 | ENSP00000301962 |
| ENSP00000081029 | ENSP00000324560 |
| ENSP00000081029 | ENSP00000337127 |
| ENSP00000081029 | ENSP00000341692 |
| ENSP00000081029 | ENSP00000352706 |
| ENSP00000081029 | ENSP00000361206 |
| ENSP00000081029 | ENSP00000362036 |
| ENSP00000081029 | ENSP00000362208 |
| ENSP00000081029 | ENSP00000372445 |
| ENSP00000081029 | ENSP00000393241 |
| ENSP00000081029 | ENSP00000400312 |
| ENSP00000081029 | ENSP00000403175 |
| ENSP00000081029 | ENSP00000412583 |

|                 |                 |
|-----------------|-----------------|
| ENSP00000081029 | ENSP00000416110 |
| ENSP00000083182 | ENSP00000223500 |
| ENSP00000083182 | ENSP00000242338 |
| ENSP00000083182 | ENSP00000262306 |
| ENSP00000083182 | ENSP00000264198 |
| ENSP00000083182 | ENSP00000284811 |
| ENSP00000083182 | ENSP00000284981 |
| ENSP00000083182 | ENSP00000287152 |
| ENSP00000083182 | ENSP00000293883 |
| ENSP00000083182 | ENSP00000295633 |
| ENSP00000083182 | ENSP00000301327 |
| ENSP00000083182 | ENSP00000322396 |
| ENSP00000083182 | ENSP00000342136 |
| ENSP00000083182 | ENSP00000345702 |
| ENSP00000083182 | ENSP00000365943 |
| ENSP00000083182 | ENSP00000369695 |
| ENSP00000083182 | ENSP00000377520 |
| ENSP00000083182 | ENSP00000390783 |
| ENSP00000085219 | ENSP00000244007 |
| ENSP00000085219 | ENSP00000313419 |
| ENSP00000085219 | ENSP00000351926 |
| ENSP00000085219 | ENSP00000352603 |
| ENSP00000085219 | ENSP00000356346 |
| ENSP00000085219 | ENSP00000364898 |
| ENSP00000085219 | ENSP00000384675 |
| ENSP00000086933 | ENSP00000372023 |
| ENSP00000156084 | ENSP00000254770 |
| ENSP00000156084 | ENSP00000317904 |
| ENSP00000156084 | ENSP00000322016 |
| ENSP00000156084 | ENSP00000339933 |
| ENSP00000156084 | ENSP00000340684 |
| ENSP00000156084 | ENSP00000356652 |
| ENSP00000156084 | ENSP00000401121 |
| ENSP00000156084 | ENSP00000403359 |
| ENSP00000156109 | ENSP00000235090 |
| ENSP00000156109 | ENSP00000253329 |
| ENSP00000156109 | ENSP00000260210 |
| ENSP00000156109 | ENSP00000261674 |
| ENSP00000156109 | ENSP00000263642 |
| ENSP00000156109 | ENSP00000268482 |
| ENSP00000156109 | ENSP00000278886 |
| ENSP00000156109 | ENSP00000298532 |
| ENSP00000156109 | ENSP00000300086 |
| ENSP00000156109 | ENSP00000304350 |
| ENSP00000156109 | ENSP00000326261 |
| ENSP00000156109 | ENSP00000330188 |

|                 |                 |
|-----------------|-----------------|
| ENSP00000156109 | ENSP00000360532 |
| ENSP00000156109 | ENSP00000363313 |
| ENSP00000156109 | ENSP00000366829 |
| ENSP00000156109 | ENSP00000374507 |
| ENSP00000156471 | ENSP00000199814 |
| ENSP00000156471 | ENSP00000216297 |
| ENSP00000156471 | ENSP00000227524 |
| ENSP00000156471 | ENSP00000235090 |
| ENSP00000156471 | ENSP00000247815 |
| ENSP00000156471 | ENSP00000254719 |
| ENSP00000156471 | ENSP00000261531 |
| ENSP00000156471 | ENSP00000264705 |
| ENSP00000156471 | ENSP00000268043 |
| ENSP00000156471 | ENSP00000286835 |
| ENSP00000156471 | ENSP00000296702 |
| ENSP00000156471 | ENSP00000300648 |
| ENSP00000156471 | ENSP00000304370 |
| ENSP00000156471 | ENSP00000307525 |
| ENSP00000156471 | ENSP00000309166 |
| ENSP00000156471 | ENSP00000325863 |
| ENSP00000156471 | ENSP00000329466 |
| ENSP00000156471 | ENSP00000334148 |
| ENSP00000156471 | ENSP00000354518 |
| ENSP00000156471 | ENSP00000356146 |
| ENSP00000156471 | ENSP00000357631 |
| ENSP00000156471 | ENSP00000358554 |
| ENSP00000156471 | ENSP00000360532 |
| ENSP00000156471 | ENSP00000363021 |
| ENSP00000156471 | ENSP00000365747 |
| ENSP00000156471 | ENSP00000367835 |
| ENSP00000156471 | ENSP00000369335 |
| ENSP00000156471 | ENSP00000370150 |
| ENSP00000156471 | ENSP00000377262 |
| ENSP00000159087 | ENSP00000262507 |
| ENSP00000159087 | ENSP00000263817 |
| ENSP00000159087 | ENSP00000281141 |
| ENSP00000159087 | ENSP00000344460 |
| ENSP00000159087 | ENSP00000353073 |
| ENSP00000159087 | ENSP00000359531 |
| ENSP00000159087 | ENSP00000362688 |
| ENSP00000159087 | ENSP00000372689 |
| ENSP00000159111 | ENSP00000206249 |
| ENSP00000159111 | ENSP00000209875 |
| ENSP00000159111 | ENSP00000255764 |
| ENSP00000159111 | ENSP00000264515 |
| ENSP00000159111 | ENSP00000295066 |

|                 |                 |
|-----------------|-----------------|
| ENSP00000159111 | ENSP00000307208 |
| ENSP00000159111 | ENSP00000320485 |
| ENSP00000159111 | ENSP00000320566 |
| ENSP00000159111 | ENSP00000337127 |
| ENSP00000159111 | ENSP00000340896 |
| ENSP00000159111 | ENSP00000349049 |
| ENSP00000159111 | ENSP00000349213 |
| ENSP00000159111 | ENSP00000358810 |
| ENSP00000159111 | ENSP00000366974 |
| ENSP00000159111 | ENSP00000373340 |
| ENSP00000159111 | ENSP00000382688 |
| ENSP00000159111 | ENSP00000384313 |
| ENSP00000159111 | ENSP00000384675 |
| ENSP00000160373 | ENSP00000295951 |
| ENSP00000160373 | ENSP00000301843 |
| ENSP00000160373 | ENSP00000311344 |
| ENSP00000160373 | ENSP00000315702 |
| ENSP00000160373 | ENSP00000317334 |
| ENSP00000160373 | ENSP00000350071 |
| ENSP00000160373 | ENSP00000352676 |
| ENSP00000160373 | ENSP00000358810 |
| ENSP00000161863 | ENSP00000199814 |
| ENSP00000161863 | ENSP00000215793 |
| ENSP00000161863 | ENSP00000216252 |
| ENSP00000161863 | ENSP00000216277 |
| ENSP00000161863 | ENSP00000216727 |
| ENSP00000161863 | ENSP00000217109 |
| ENSP00000161863 | ENSP00000221494 |
| ENSP00000161863 | ENSP00000222969 |
| ENSP00000161863 | ENSP00000227524 |
| ENSP00000161863 | ENSP00000229214 |
| ENSP00000161863 | ENSP00000230340 |
| ENSP00000161863 | ENSP00000230859 |
| ENSP00000161863 | ENSP00000236273 |
| ENSP00000161863 | ENSP00000243563 |
| ENSP00000161863 | ENSP00000245544 |
| ENSP00000161863 | ENSP00000254193 |
| ENSP00000161863 | ENSP00000257829 |
| ENSP00000161863 | ENSP00000260210 |
| ENSP00000161863 | ENSP00000261531 |
| ENSP00000161863 | ENSP00000261708 |
| ENSP00000161863 | ENSP00000261973 |
| ENSP00000161863 | ENSP00000262320 |
| ENSP00000161863 | ENSP00000264951 |
| ENSP00000161863 | ENSP00000266079 |
| ENSP00000161863 | ENSP00000266735 |



|                 |                 |
|-----------------|-----------------|
| ENSP00000161863 | ENSP00000269385 |
| ENSP00000161863 | ENSP00000271628 |
| ENSP00000161863 | ENSP00000296215 |
| ENSP00000161863 | ENSP00000297990 |
| ENSP00000161863 | ENSP00000298281 |
| ENSP00000161863 | ENSP00000298532 |
| ENSP00000161863 | ENSP00000298937 |
| ENSP00000161863 | ENSP00000300291 |
| ENSP00000161863 | ENSP00000301962 |
| ENSP00000161863 | ENSP00000303191 |
| ENSP00000161863 | ENSP00000304350 |
| ENSP00000161863 | ENSP00000304370 |
| ENSP00000161863 | ENSP00000304704 |
| ENSP00000161863 | ENSP00000305790 |
| ENSP00000161863 | ENSP00000315035 |
| ENSP00000161863 | ENSP00000315379 |
| ENSP00000161863 | ENSP00000315674 |
| ENSP00000161863 | ENSP00000315791 |
| ENSP00000161863 | ENSP00000323302 |
| ENSP00000161863 | ENSP00000324122 |
| ENSP00000161863 | ENSP00000326477 |
| ENSP00000161863 | ENSP00000326806 |
| ENSP00000161863 | ENSP00000328854 |
| ENSP00000161863 | ENSP00000329466 |
| ENSP00000161863 | ENSP00000334148 |
| ENSP00000161863 | ENSP00000335321 |
| ENSP00000161863 | ENSP00000336752 |
| ENSP00000161863 | ENSP00000339090 |
| ENSP00000161863 | ENSP00000339353 |
| ENSP00000161863 | ENSP00000345917 |
| ENSP00000161863 | ENSP00000348010 |
| ENSP00000161863 | ENSP00000350967 |
| ENSP00000161863 | ENSP00000351492 |
| ENSP00000161863 | ENSP00000352738 |
| ENSP00000161863 | ENSP00000355541 |
| ENSP00000161863 | ENSP00000357965 |
| ENSP00000161863 | ENSP00000358554 |
| ENSP00000161863 | ENSP00000358812 |
| ENSP00000161863 | ENSP00000358997 |
| ENSP00000161863 | ENSP00000360031 |
| ENSP00000161863 | ENSP00000360497 |
| ENSP00000161863 | ENSP00000360532 |
| ENSP00000161863 | ENSP00000361557 |
| ENSP00000161863 | ENSP00000361577 |
| ENSP00000161863 | ENSP00000362110 |
| ENSP00000161863 | ENSP00000363313 |

|                 |                 |
|-----------------|-----------------|
| ENSP00000161863 | ENSP00000364289 |
| ENSP00000161863 | ENSP00000366135 |
| ENSP00000161863 | ENSP00000366557 |
| ENSP00000161863 | ENSP00000367835 |
| ENSP00000161863 | ENSP00000368017 |
| ENSP00000161863 | ENSP00000370460 |
| ENSP00000161863 | ENSP00000376973 |
| ENSP00000161863 | ENSP00000383059 |
| ENSP00000161863 | ENSP00000387006 |
| ENSP00000161863 | ENSP00000391432 |
| ENSP00000161863 | ENSP00000400591 |
| ENSP00000161863 | ENSP00000404151 |
| ENSP00000162330 | ENSP00000171887 |
| ENSP00000162330 | ENSP00000206249 |
| ENSP00000162330 | ENSP00000211998 |
| ENSP00000162330 | ENSP00000228307 |
| ENSP00000162330 | ENSP00000233154 |
| ENSP00000162330 | ENSP00000262304 |
| ENSP00000162330 | ENSP00000276893 |
| ENSP00000162330 | ENSP00000298229 |
| ENSP00000162330 | ENSP00000300574 |
| ENSP00000162330 | ENSP00000309230 |
| ENSP00000162330 | ENSP00000310561 |
| ENSP00000162330 | ENSP00000312506 |
| ENSP00000162330 | ENSP00000313169 |
| ENSP00000162330 | ENSP00000316460 |
| ENSP00000162330 | ENSP00000317817 |
| ENSP00000162330 | ENSP00000324422 |
| ENSP00000162330 | ENSP00000340944 |
| ENSP00000162330 | ENSP00000341189 |
| ENSP00000162330 | ENSP00000361264 |
| ENSP00000162330 | ENSP00000371341 |
| ENSP00000162330 | ENSP00000380921 |
| ENSP00000162749 | ENSP00000185150 |
| ENSP00000162749 | ENSP00000216274 |
| ENSP00000162749 | ENSP00000219789 |
| ENSP00000162749 | ENSP00000220751 |
| ENSP00000162749 | ENSP00000221566 |
| ENSP00000162749 | ENSP00000225972 |
| ENSP00000162749 | ENSP00000227758 |
| ENSP00000162749 | ENSP00000231572 |
| ENSP00000162749 | ENSP00000232003 |
| ENSP00000162749 | ENSP00000234111 |
| ENSP00000162749 | ENSP00000237289 |
| ENSP00000162749 | ENSP00000238341 |
| ENSP00000162749 | ENSP00000252015 |

|                 |                 |
|-----------------|-----------------|
| ENSP00000162749 | ENSP00000259808 |
| ENSP00000162749 | ENSP00000260187 |
| ENSP00000162749 | ENSP00000265717 |
| ENSP00000162749 | ENSP00000268605 |
| ENSP00000162749 | ENSP00000269143 |
| ENSP00000162749 | ENSP00000286186 |
| ENSP00000162749 | ENSP00000287322 |
| ENSP00000162749 | ENSP00000301838 |
| ENSP00000162749 | ENSP00000310129 |
| ENSP00000162749 | ENSP00000310933 |
| ENSP00000162749 | ENSP00000312664 |
| ENSP00000162749 | ENSP00000313420 |
| ENSP00000162749 | ENSP00000318822 |
| ENSP00000162749 | ENSP00000319713 |
| ENSP00000162749 | ENSP00000325448 |
| ENSP00000162749 | ENSP00000326699 |
| ENSP00000162749 | ENSP00000327647 |
| ENSP00000162749 | ENSP00000337053 |
| ENSP00000162749 | ENSP00000338983 |
| ENSP00000162749 | ENSP00000339191 |
| ENSP00000162749 | ENSP00000340409 |
| ENSP00000162749 | ENSP00000340944 |
| ENSP00000162749 | ENSP00000341189 |
| ENSP00000162749 | ENSP00000341268 |
| ENSP00000162749 | ENSP00000343412 |
| ENSP00000162749 | ENSP00000347979 |
| ENSP00000162749 | ENSP00000350785 |
| ENSP00000162749 | ENSP00000356694 |
| ENSP00000162749 | ENSP00000358335 |
| ENSP00000162749 | ENSP00000358997 |
| ENSP00000162749 | ENSP00000359727 |
| ENSP00000162749 | ENSP00000364898 |
| ENSP00000162749 | ENSP00000380921 |
| ENSP00000162749 | ENSP00000381891 |
| ENSP00000162749 | ENSP00000395102 |
| ENSP00000162749 | ENSP00000401445 |
| ENSP00000162749 | ENSP00000410481 |
| ENSP00000163416 | ENSP00000292535 |
| ENSP00000163416 | ENSP00000370719 |
| ENSP00000163416 | ENSP00000382327 |
| ENSP00000164024 | ENSP00000283943 |
| ENSP00000164024 | ENSP00000296084 |
| ENSP00000164024 | ENSP00000310800 |
| ENSP00000164024 | ENSP00000313309 |
| ENSP00000164024 | ENSP00000314556 |
| ENSP00000164024 | ENSP00000319831 |

|                 |                 |
|-----------------|-----------------|
| ENSP00000164024 | ENSP00000326924 |
| ENSP00000164024 | ENSP00000334003 |
| ENSP00000164024 | ENSP00000351605 |
| ENSP00000164024 | ENSP00000354895 |
| ENSP00000164024 | ENSP00000388872 |
| ENSP00000164227 | ENSP00000222330 |
| ENSP00000164227 | ENSP00000226574 |
| ENSP00000164227 | ENSP00000260947 |
| ENSP00000164227 | ENSP00000261435 |
| ENSP00000164227 | ENSP00000262193 |
| ENSP00000164227 | ENSP00000262367 |
| ENSP00000164227 | ENSP00000295025 |
| ENSP00000164227 | ENSP00000306245 |
| ENSP00000164227 | ENSP00000311825 |
| ENSP00000164227 | ENSP00000334061 |
| ENSP00000164227 | ENSP00000340879 |
| ENSP00000164227 | ENSP00000344456 |
| ENSP00000164227 | ENSP00000349049 |
| ENSP00000164227 | ENSP00000349748 |
| ENSP00000164227 | ENSP00000350512 |
| ENSP00000164227 | ENSP00000351894 |
| ENSP00000164227 | ENSP00000359531 |
| ENSP00000164227 | ENSP00000359727 |
| ENSP00000164227 | ENSP00000364893 |
| ENSP00000164227 | ENSP00000369785 |
| ENSP00000164305 | ENSP00000251038 |
| ENSP00000164305 | ENSP00000304370 |
| ENSP00000164305 | ENSP00000330945 |
| ENSP00000164305 | ENSP00000334148 |
| ENSP00000166139 | ENSP00000242208 |
| ENSP00000166139 | ENSP00000341551 |
| ENSP00000166139 | ENSP00000346839 |
| ENSP00000166345 | ENSP00000209728 |
| ENSP00000166345 | ENSP00000212015 |
| ENSP00000166345 | ENSP00000216297 |
| ENSP00000166345 | ENSP00000219473 |
| ENSP00000166345 | ENSP00000219479 |
| ENSP00000166345 | ENSP00000220669 |
| ENSP00000166345 | ENSP00000229595 |
| ENSP00000166345 | ENSP00000234170 |
| ENSP00000166345 | ENSP00000235310 |
| ENSP00000166345 | ENSP00000238379 |
| ENSP00000166345 | ENSP00000251864 |
| ENSP00000166345 | ENSP00000251968 |
| ENSP00000166345 | ENSP00000254719 |
| ENSP00000166345 | ENSP00000254940 |

|                 |                 |
|-----------------|-----------------|
| ENSP00000166345 | ENSP00000257934 |
| ENSP00000166345 | ENSP00000260643 |
| ENSP00000166345 | ENSP00000261173 |
| ENSP00000166345 | ENSP00000261531 |
| ENSP00000166345 | ENSP00000263187 |
| ENSP00000166345 | ENSP00000263795 |
| ENSP00000166345 | ENSP00000263925 |
| ENSP00000166345 | ENSP00000264705 |
| ENSP00000166345 | ENSP00000267430 |
| ENSP00000166345 | ENSP00000276326 |
| ENSP00000166345 | ENSP00000278412 |
| ENSP00000166345 | ENSP00000296509 |
| ENSP00000166345 | ENSP00000300896 |
| ENSP00000166345 | ENSP00000307142 |
| ENSP00000166345 | ENSP00000308466 |
| ENSP00000166345 | ENSP00000308546 |
| ENSP00000166345 | ENSP00000308944 |
| ENSP00000166345 | ENSP00000310129 |
| ENSP00000166345 | ENSP00000310520 |
| ENSP00000166345 | ENSP00000317468 |
| ENSP00000166345 | ENSP00000322885 |
| ENSP00000166345 | ENSP00000325448 |
| ENSP00000166345 | ENSP00000331209 |
| ENSP00000166345 | ENSP00000336606 |
| ENSP00000166345 | ENSP00000338606 |
| ENSP00000166345 | ENSP00000338862 |
| ENSP00000166345 | ENSP00000339047 |
| ENSP00000166345 | ENSP00000340879 |
| ENSP00000166345 | ENSP00000341848 |
| ENSP00000166345 | ENSP00000343635 |
| ENSP00000166345 | ENSP00000343741 |
| ENSP00000166345 | ENSP00000347038 |
| ENSP00000166345 | ENSP00000348573 |
| ENSP00000166345 | ENSP00000352572 |
| ENSP00000166345 | ENSP00000353073 |
| ENSP00000166345 | ENSP00000354486 |
| ENSP00000166345 | ENSP00000355865 |
| ENSP00000166345 | ENSP00000355922 |
| ENSP00000166345 | ENSP00000357861 |
| ENSP00000166345 | ENSP00000358478 |
| ENSP00000166345 | ENSP00000359403 |
| ENSP00000166345 | ENSP00000360310 |
| ENSP00000166345 | ENSP00000360412 |
| ENSP00000166345 | ENSP00000360532 |
| ENSP00000166345 | ENSP00000360621 |
| ENSP00000166345 | ENSP00000360992 |

|                 |                 |
|-----------------|-----------------|
| ENSP00000166345 | ENSP00000362936 |
| ENSP00000166345 | ENSP00000363433 |
| ENSP00000166345 | ENSP00000368119 |
| ENSP00000166345 | ENSP00000368801 |
| ENSP00000166345 | ENSP00000370410 |
| ENSP00000166345 | ENSP00000370588 |
| ENSP00000166345 | ENSP00000386394 |
| ENSP00000166345 | ENSP00000389175 |
| ENSP00000166345 | ENSP00000394649 |
| ENSP00000166345 | ENSP00000396704 |
| ENSP00000166345 | ENSP00000406868 |
| ENSP00000166345 | ENSP00000407047 |
| ENSP00000166345 | ENSP00000410818 |
| ENSP00000167106 | ENSP00000361599 |
| ENSP00000168977 | ENSP00000215071 |
| ENSP00000168977 | ENSP00000222553 |
| ENSP00000168977 | ENSP00000244741 |
| ENSP00000168977 | ENSP00000258418 |
| ENSP00000168977 | ENSP00000265437 |
| ENSP00000168977 | ENSP00000276654 |
| ENSP00000168977 | ENSP00000346155 |
| ENSP00000168977 | ENSP00000348577 |
| ENSP00000168977 | ENSP00000351113 |
| ENSP00000168977 | ENSP00000354532 |
| ENSP00000168977 | ENSP00000369519 |
| ENSP00000168977 | ENSP00000369862 |
| ENSP00000168977 | ENSP00000401508 |
| ENSP00000169551 | ENSP00000216034 |
| ENSP00000169551 | ENSP00000250615 |
| ENSP00000169551 | ENSP00000252487 |
| ENSP00000169551 | ENSP00000258424 |
| ENSP00000169551 | ENSP00000259667 |
| ENSP00000169551 | ENSP00000270538 |
| ENSP00000169551 | ENSP00000276416 |
| ENSP00000169551 | ENSP00000295767 |
| ENSP00000169551 | ENSP00000296805 |
| ENSP00000169551 | ENSP00000300151 |
| ENSP00000169551 | ENSP00000301585 |
| ENSP00000169551 | ENSP00000310723 |
| ENSP00000169551 | ENSP00000315693 |
| ENSP00000169551 | ENSP00000318115 |
| ENSP00000169551 | ENSP00000320236 |
| ENSP00000169551 | ENSP00000320758 |
| ENSP00000169551 | ENSP00000338293 |
| ENSP00000169551 | ENSP00000344220 |
| ENSP00000169551 | ENSP00000347919 |

|                 |                 |
|-----------------|-----------------|
| ENSP00000169551 | ENSP00000349205 |
| ENSP00000169551 | ENSP00000353698 |
| ENSP00000169551 | ENSP00000354499 |
| ENSP00000169551 | ENSP00000354876 |
| ENSP00000169551 | ENSP00000355572 |
| ENSP00000169551 | ENSP00000365766 |
| ENSP00000169551 | ENSP00000366863 |
| ENSP00000169551 | ENSP00000367934 |
| ENSP00000169551 | ENSP00000368066 |
| ENSP00000169551 | ENSP00000368523 |
| ENSP00000169551 | ENSP00000387262 |
| ENSP00000170168 | ENSP00000203001 |
| ENSP00000170168 | ENSP00000253107 |
| ENSP00000170168 | ENSP00000265881 |
| ENSP00000170168 | ENSP00000327821 |
| ENSP00000170168 | ENSP00000339529 |
| ENSP00000170168 | ENSP00000348107 |
| ENSP00000170168 | ENSP00000366135 |
| ENSP00000170168 | ENSP00000368438 |
| ENSP00000170168 | ENSP00000376973 |
| ENSP00000170168 | ENSP00000395574 |
| ENSP00000170564 | ENSP00000227524 |
| ENSP00000170564 | ENSP00000247219 |
| ENSP00000170564 | ENSP00000304370 |
| ENSP00000170564 | ENSP00000304704 |
| ENSP00000170564 | ENSP00000334148 |
| ENSP00000170564 | ENSP00000339723 |
| ENSP00000170564 | ENSP00000358854 |
| ENSP00000170630 | ENSP00000231449 |
| ENSP00000170630 | ENSP00000304915 |
| ENSP00000170630 | ENSP00000305133 |
| ENSP00000170630 | ENSP00000331201 |
| ENSP00000170630 | ENSP00000340944 |
| ENSP00000170630 | ENSP00000360730 |
| ENSP00000170630 | ENSP00000365016 |
| ENSP00000171887 | ENSP00000216194 |
| ENSP00000171887 | ENSP00000219476 |
| ENSP00000171887 | ENSP00000228307 |
| ENSP00000171887 | ENSP00000252699 |
| ENSP00000171887 | ENSP00000262039 |
| ENSP00000171887 | ENSP00000298552 |
| ENSP00000171887 | ENSP00000306245 |
| ENSP00000171887 | ENSP00000313059 |
| ENSP00000171887 | ENSP00000313169 |
| ENSP00000171887 | ENSP00000313420 |
| ENSP00000171887 | ENSP00000327145 |

|                 |                 |
|-----------------|-----------------|
| ENSP00000171887 | ENSP00000341189 |
| ENSP00000171887 | ENSP00000348020 |
| ENSP00000171887 | ENSP00000352121 |
| ENSP00000171887 | ENSP00000354558 |
| ENSP00000171887 | ENSP00000355296 |
| ENSP00000171887 | ENSP00000363680 |
| ENSP00000171887 | ENSP00000365016 |
| ENSP00000171887 | ENSP00000379607 |
| ENSP00000171887 | ENSP00000402515 |
| ENSP00000172229 | ENSP00000220751 |
| ENSP00000172229 | ENSP00000226730 |
| ENSP00000172229 | ENSP00000256637 |
| ENSP00000172229 | ENSP00000256707 |
| ENSP00000172229 | ENSP00000262294 |
| ENSP00000172229 | ENSP00000264246 |
| ENSP00000172229 | ENSP00000281043 |
| ENSP00000172229 | ENSP00000284981 |
| ENSP00000172229 | ENSP00000298552 |
| ENSP00000172229 | ENSP00000322457 |
| ENSP00000172229 | ENSP00000326366 |
| ENSP00000172229 | ENSP00000329357 |
| ENSP00000172229 | ENSP00000333537 |
| ENSP00000172229 | ENSP00000339191 |
| ENSP00000172229 | ENSP00000341268 |
| ENSP00000172229 | ENSP00000347451 |
| ENSP00000172229 | ENSP00000354207 |
| ENSP00000172229 | ENSP00000364847 |
| ENSP00000172229 | ENSP00000394794 |
| ENSP00000172229 | ENSP00000416959 |
| ENSP00000173527 | ENSP00000251038 |
| ENSP00000173527 | ENSP00000294973 |
| ENSP00000173527 | ENSP00000355518 |
| ENSP00000173527 | ENSP00000410758 |
| ENSP00000173898 | ENSP00000230340 |
| ENSP00000173898 | ENSP00000257909 |
| ENSP00000173898 | ENSP00000306245 |
| ENSP00000173898 | ENSP00000343535 |
| ENSP00000174618 | ENSP00000219476 |
| ENSP00000174618 | ENSP00000246912 |
| ENSP00000174618 | ENSP00000351490 |
| ENSP00000174618 | ENSP00000353622 |
| ENSP00000174618 | ENSP00000382562 |
| ENSP00000174618 | ENSP00000414187 |
| ENSP00000175506 | ENSP00000287878 |
| ENSP00000175506 | ENSP00000329466 |
| ENSP00000175506 | ENSP00000361699 |



|                 |                 |
|-----------------|-----------------|
| ENSP00000176183 | ENSP00000219548 |
| ENSP00000176183 | ENSP00000233154 |
| ENSP00000176183 | ENSP00000290332 |
| ENSP00000176183 | ENSP00000295101 |
| ENSP00000176183 | ENSP00000360916 |
| ENSP00000176195 | ENSP00000230588 |
| ENSP00000176195 | ENSP00000326366 |
| ENSP00000176195 | ENSP00000358120 |
| ENSP00000176195 | ENSP00000365678 |
| ENSP00000178640 | ENSP00000181839 |
| ENSP00000178640 | ENSP00000216160 |
| ENSP00000178640 | ENSP00000219473 |
| ENSP00000178640 | ENSP00000224073 |
| ENSP00000178640 | ENSP00000228307 |
| ENSP00000178640 | ENSP00000233078 |
| ENSP00000178640 | ENSP00000234590 |
| ENSP00000178640 | ENSP00000245960 |
| ENSP00000178640 | ENSP00000254654 |
| ENSP00000178640 | ENSP00000261211 |
| ENSP00000178640 | ENSP00000263043 |
| ENSP00000178640 | ENSP00000264380 |
| ENSP00000178640 | ENSP00000265562 |
| ENSP00000178640 | ENSP00000282388 |
| ENSP00000178640 | ENSP00000282541 |
| ENSP00000178640 | ENSP00000283228 |
| ENSP00000178640 | ENSP00000306682 |
| ENSP00000178640 | ENSP00000309103 |
| ENSP00000178640 | ENSP00000311005 |
| ENSP00000178640 | ENSP00000311343 |
| ENSP00000178640 | ENSP00000312411 |
| ENSP00000178640 | ENSP00000320754 |
| ENSP00000178640 | ENSP00000334188 |
| ENSP00000178640 | ENSP00000340944 |
| ENSP00000178640 | ENSP00000352257 |
| ENSP00000178640 | ENSP00000354927 |
| ENSP00000178640 | ENSP00000355296 |
| ENSP00000178640 | ENSP00000356379 |
| ENSP00000178640 | ENSP00000356595 |
| ENSP00000178640 | ENSP00000357494 |
| ENSP00000178640 | ENSP00000357907 |
| ENSP00000178640 | ENSP00000358293 |
| ENSP00000178640 | ENSP00000362656 |
| ENSP00000178640 | ENSP00000373702 |
| ENSP00000178640 | ENSP00000374455 |
| ENSP00000178640 | ENSP00000377047 |
| ENSP00000178640 | ENSP00000378306 |

|                 |                 |
|-----------------|-----------------|
| ENSP00000179259 | ENSP00000216392 |
| ENSP00000179259 | ENSP00000232607 |
| ENSP00000179259 | ENSP00000246166 |
| ENSP00000179259 | ENSP00000253237 |
| ENSP00000179259 | ENSP00000261531 |
| ENSP00000179259 | ENSP00000263956 |
| ENSP00000179259 | ENSP00000304350 |
| ENSP00000179259 | ENSP00000321259 |
| ENSP00000179259 | ENSP00000359531 |
| ENSP00000179259 | ENSP00000361180 |
| ENSP00000179259 | ENSP00000362413 |
| ENSP00000179259 | ENSP00000363676 |
| ENSP00000181839 | ENSP00000209728 |
| ENSP00000181839 | ENSP00000216297 |
| ENSP00000181839 | ENSP00000221265 |
| ENSP00000181839 | ENSP00000224140 |
| ENSP00000181839 | ENSP00000225504 |
| ENSP00000181839 | ENSP00000225728 |
| ENSP00000181839 | ENSP00000229595 |
| ENSP00000181839 | ENSP00000236051 |
| ENSP00000181839 | ENSP00000246802 |
| ENSP00000181839 | ENSP00000254719 |
| ENSP00000181839 | ENSP00000254803 |
| ENSP00000181839 | ENSP00000254942 |
| ENSP00000181839 | ENSP00000256398 |
| ENSP00000181839 | ENSP00000256897 |
| ENSP00000181839 | ENSP00000261211 |
| ENSP00000181839 | ENSP00000261601 |
| ENSP00000181839 | ENSP00000261845 |
| ENSP00000181839 | ENSP00000262173 |
| ENSP00000181839 | ENSP00000262518 |
| ENSP00000181839 | ENSP00000264157 |
| ENSP00000181839 | ENSP00000264515 |
| ENSP00000181839 | ENSP00000264951 |
| ENSP00000181839 | ENSP00000265073 |
| ENSP00000181839 | ENSP00000265857 |
| ENSP00000181839 | ENSP00000268043 |
| ENSP00000181839 | ENSP00000271764 |
| ENSP00000181839 | ENSP00000273064 |
| ENSP00000181839 | ENSP00000276603 |
| ENSP00000181839 | ENSP00000282077 |
| ENSP00000181839 | ENSP00000286835 |
| ENSP00000181839 | ENSP00000291386 |
| ENSP00000181839 | ENSP00000293406 |
| ENSP00000181839 | ENSP00000295066 |
| ENSP00000181839 | ENSP00000295240 |

|                 |                 |
|-----------------|-----------------|
| ENSP00000181839 | ENSP00000296786 |
| ENSP00000181839 | ENSP00000297185 |
| ENSP00000181839 | ENSP00000298283 |
| ENSP00000181839 | ENSP00000299543 |
| ENSP00000181839 | ENSP00000299601 |
| ENSP00000181839 | ENSP00000300584 |
| ENSP00000181839 | ENSP00000301364 |
| ENSP00000181839 | ENSP00000302478 |
| ENSP00000181839 | ENSP00000302896 |
| ENSP00000181839 | ENSP00000304593 |
| ENSP00000181839 | ENSP00000311005 |
| ENSP00000181839 | ENSP00000312735 |
| ENSP00000181839 | ENSP00000314348 |
| ENSP00000181839 | ENSP00000315674 |
| ENSP00000181839 | ENSP00000315693 |
| ENSP00000181839 | ENSP00000315859 |
| ENSP00000181839 | ENSP00000319104 |
| ENSP00000181839 | ENSP00000320566 |
| ENSP00000181839 | ENSP00000320917 |
| ENSP00000181839 | ENSP00000321449 |
| ENSP00000181839 | ENSP00000322396 |
| ENSP00000181839 | ENSP00000325376 |
| ENSP00000181839 | ENSP00000325677 |
| ENSP00000181839 | ENSP00000331310 |
| ENSP00000181839 | ENSP00000331817 |
| ENSP00000181839 | ENSP00000336842 |
| ENSP00000181839 | ENSP00000338788 |
| ENSP00000181839 | ENSP00000338862 |
| ENSP00000181839 | ENSP00000340896 |
| ENSP00000181839 | ENSP00000341885 |
| ENSP00000181839 | ENSP00000343741 |
| ENSP00000181839 | ENSP00000351284 |
| ENSP00000181839 | ENSP00000353622 |
| ENSP00000181839 | ENSP00000354673 |
| ENSP00000181839 | ENSP00000354812 |
| ENSP00000181839 | ENSP00000355013 |
| ENSP00000181839 | ENSP00000355205 |
| ENSP00000181839 | ENSP00000356146 |
| ENSP00000181839 | ENSP00000356405 |
| ENSP00000181839 | ENSP00000356989 |
| ENSP00000181839 | ENSP00000357887 |
| ENSP00000181839 | ENSP00000357907 |
| ENSP00000181839 | ENSP00000358812 |
| ENSP00000181839 | ENSP00000359518 |
| ENSP00000181839 | ENSP00000360116 |
| ENSP00000181839 | ENSP00000362900 |

|                 |                 |
|-----------------|-----------------|
| ENSP00000181839 | ENSP00000363779 |
| ENSP00000181839 | ENSP00000364289 |
| ENSP00000181839 | ENSP00000364912 |
| ENSP00000181839 | ENSP00000366135 |
| ENSP00000181839 | ENSP00000367029 |
| ENSP00000181839 | ENSP00000368349 |
| ENSP00000181839 | ENSP00000373700 |
| ENSP00000181839 | ENSP00000374213 |
| ENSP00000181839 | ENSP00000374280 |
| ENSP00000181839 | ENSP00000374529 |
| ENSP00000181839 | ENSP00000379217 |
| ENSP00000181839 | ENSP00000380504 |
| ENSP00000181839 | ENSP00000381657 |
| ENSP00000181839 | ENSP00000386759 |
| ENSP00000181839 | ENSP00000397259 |
| ENSP00000181839 | ENSP00000402338 |
| ENSP00000185150 | ENSP00000238789 |
| ENSP00000185150 | ENSP00000248633 |
| ENSP00000185150 | ENSP00000253719 |
| ENSP00000185150 | ENSP00000258654 |
| ENSP00000185150 | ENSP00000259512 |
| ENSP00000185150 | ENSP00000260643 |
| ENSP00000185150 | ENSP00000261534 |
| ENSP00000185150 | ENSP00000261942 |
| ENSP00000185150 | ENSP00000265070 |
| ENSP00000185150 | ENSP00000298852 |
| ENSP00000185150 | ENSP00000299767 |
| ENSP00000185150 | ENSP00000303511 |
| ENSP00000185150 | ENSP00000318147 |
| ENSP00000185150 | ENSP00000320885 |
| ENSP00000185150 | ENSP00000332979 |
| ENSP00000185150 | ENSP00000333836 |
| ENSP00000185150 | ENSP00000337053 |
| ENSP00000185150 | ENSP00000347140 |
| ENSP00000185150 | ENSP00000366395 |
| ENSP00000185150 | ENSP00000379457 |
| ENSP00000185150 | ENSP00000381891 |
| ENSP00000185150 | ENSP00000387347 |
| ENSP00000193322 | ENSP00000297313 |
| ENSP00000193322 | ENSP00000333298 |
| ENSP00000194118 | ENSP00000222115 |
| ENSP00000194118 | ENSP00000236067 |
| ENSP00000194118 | ENSP00000243253 |
| ENSP00000194118 | ENSP00000331487 |
| ENSP00000194118 | ENSP00000343885 |
| ENSP00000194214 | ENSP00000238789 |

|                 |                 |
|-----------------|-----------------|
| ENSP00000194214 | ENSP00000256474 |
| ENSP00000194214 | ENSP00000257934 |
| ENSP00000194214 | ENSP00000261211 |
| ENSP00000194214 | ENSP00000261819 |
| ENSP00000194214 | ENSP00000261881 |
| ENSP00000194214 | ENSP00000265148 |
| ENSP00000194214 | ENSP00000287598 |
| ENSP00000194214 | ENSP00000291539 |
| ENSP00000194214 | ENSP00000296577 |
| ENSP00000194214 | ENSP00000300291 |
| ENSP00000194214 | ENSP00000302530 |
| ENSP00000194214 | ENSP00000314004 |
| ENSP00000194214 | ENSP00000344741 |
| ENSP00000194214 | ENSP00000346566 |
| ENSP00000194214 | ENSP00000355013 |
| ENSP00000194214 | ENSP00000386156 |
| ENSP00000194214 | ENSP00000403852 |
| ENSP00000195654 | ENSP00000228027 |
| ENSP00000195654 | ENSP00000262854 |
| ENSP00000195654 | ENSP00000262903 |
| ENSP00000195654 | ENSP00000283943 |
| ENSP00000195654 | ENSP00000304500 |
| ENSP00000195654 | ENSP00000308496 |
| ENSP00000195654 | ENSP00000348714 |
| ENSP00000195654 | ENSP00000361245 |
| ENSP00000195654 | ENSP00000382269 |
| ENSP00000195654 | ENSP00000414786 |
| ENSP00000196169 | ENSP00000222005 |
| ENSP00000196169 | ENSP00000229201 |
| ENSP00000196169 | ENSP00000240159 |
| ENSP00000196169 | ENSP00000250113 |
| ENSP00000196169 | ENSP00000251303 |
| ENSP00000196169 | ENSP00000261881 |
| ENSP00000196169 | ENSP00000262794 |
| ENSP00000196169 | ENSP00000268043 |
| ENSP00000196169 | ENSP00000307853 |
| ENSP00000196169 | ENSP00000313829 |
| ENSP00000196169 | ENSP00000314311 |
| ENSP00000196169 | ENSP00000321636 |
| ENSP00000196169 | ENSP00000322242 |
| ENSP00000196169 | ENSP00000325690 |
| ENSP00000196169 | ENSP00000326128 |
| ENSP00000196169 | ENSP00000328940 |
| ENSP00000196169 | ENSP00000331879 |
| ENSP00000196169 | ENSP00000343103 |
| ENSP00000196169 | ENSP00000351284 |

|                 |                 |
|-----------------|-----------------|
| ENSP00000196169 | ENSP00000354522 |
| ENSP00000196169 | ENSP00000366843 |
| ENSP00000196169 | ENSP00000369335 |
| ENSP00000196169 | ENSP00000369757 |
| ENSP00000196169 | ENSP00000370151 |
| ENSP00000196169 | ENSP00000372023 |
| ENSP00000196169 | ENSP00000381031 |
| ENSP00000196169 | ENSP00000387303 |
| ENSP00000196371 | ENSP00000311505 |
| ENSP00000196371 | ENSP00000335060 |
| ENSP00000196551 | ENSP00000199320 |
| ENSP00000196551 | ENSP00000202773 |
| ENSP00000196551 | ENSP00000211372 |
| ENSP00000196551 | ENSP00000219252 |
| ENSP00000196551 | ENSP00000221859 |
| ENSP00000196551 | ENSP00000222247 |
| ENSP00000196551 | ENSP00000224140 |
| ENSP00000196551 | ENSP00000225430 |
| ENSP00000196551 | ENSP00000227524 |
| ENSP00000196551 | ENSP00000229214 |
| ENSP00000196551 | ENSP00000230050 |
| ENSP00000196551 | ENSP00000230859 |
| ENSP00000196551 | ENSP00000232888 |
| ENSP00000196551 | ENSP00000232905 |
| ENSP00000196551 | ENSP00000241600 |
| ENSP00000196551 | ENSP00000244230 |
| ENSP00000196551 | ENSP00000251038 |
| ENSP00000196551 | ENSP00000252543 |
| ENSP00000196551 | ENSP00000253099 |
| ENSP00000196551 | ENSP00000253788 |
| ENSP00000196551 | ENSP00000257829 |
| ENSP00000196551 | ENSP00000258455 |
| ENSP00000196551 | ENSP00000259469 |
| ENSP00000196551 | ENSP00000259569 |
| ENSP00000196551 | ENSP00000260102 |
| ENSP00000196551 | ENSP00000260443 |
| ENSP00000196551 | ENSP00000262544 |
| ENSP00000196551 | ENSP00000262584 |
| ENSP00000196551 | ENSP00000262803 |
| ENSP00000196551 | ENSP00000263629 |
| ENSP00000196551 | ENSP00000263657 |
| ENSP00000196551 | ENSP00000264515 |
| ENSP00000196551 | ENSP00000264995 |
| ENSP00000196551 | ENSP00000265100 |
| ENSP00000196551 | ENSP00000268206 |
| ENSP00000196551 | ENSP00000268661 |

|                 |                 |
|-----------------|-----------------|
| ENSP00000196551 | ENSP00000268802 |
| ENSP00000196551 | ENSP00000270625 |
| ENSP00000196551 | ENSP00000272418 |
| ENSP00000196551 | ENSP00000274606 |
| ENSP00000196551 | ENSP00000277541 |
| ENSP00000196551 | ENSP00000278572 |
| ENSP00000196551 | ENSP00000280557 |
| ENSP00000196551 | ENSP00000283109 |
| ENSP00000196551 | ENSP00000287038 |
| ENSP00000196551 | ENSP00000288937 |
| ENSP00000196551 | ENSP00000289371 |
| ENSP00000196551 | ENSP00000295491 |
| ENSP00000196551 | ENSP00000295930 |
| ENSP00000196551 | ENSP00000296674 |
| ENSP00000196551 | ENSP00000296792 |
| ENSP00000196551 | ENSP00000296802 |
| ENSP00000196551 | ENSP00000296805 |
| ENSP00000196551 | ENSP00000297908 |
| ENSP00000196551 | ENSP00000297990 |
| ENSP00000196551 | ENSP00000298283 |
| ENSP00000196551 | ENSP00000300151 |
| ENSP00000196551 | ENSP00000301729 |
| ENSP00000196551 | ENSP00000301740 |
| ENSP00000196551 | ENSP00000302896 |
| ENSP00000196551 | ENSP00000306548 |
| ENSP00000196551 | ENSP00000307567 |
| ENSP00000196551 | ENSP00000307889 |
| ENSP00000196551 | ENSP00000308897 |
| ENSP00000196551 | ENSP00000309334 |
| ENSP00000196551 | ENSP00000309433 |
| ENSP00000196551 | ENSP00000311028 |
| ENSP00000196551 | ENSP00000311430 |
| ENSP00000196551 | ENSP00000312042 |
| ENSP00000196551 | ENSP00000312735 |
| ENSP00000196551 | ENSP00000317376 |
| ENSP00000196551 | ENSP00000318195 |
| ENSP00000196551 | ENSP00000318646 |
| ENSP00000196551 | ENSP00000322419 |
| ENSP00000196551 | ENSP00000323856 |
| ENSP00000196551 | ENSP00000324122 |
| ENSP00000196551 | ENSP00000326261 |
| ENSP00000196551 | ENSP00000326699 |
| ENSP00000196551 | ENSP00000326981 |
| ENSP00000196551 | ENSP00000329466 |
| ENSP00000196551 | ENSP00000329967 |
| ENSP00000196551 | ENSP00000331019 |

|                 |                 |
|-----------------|-----------------|
| ENSP00000196551 | ENSP00000336702 |
| ENSP00000196551 | ENSP00000337127 |
| ENSP00000196551 | ENSP00000339095 |
| ENSP00000196551 | ENSP00000339795 |
| ENSP00000196551 | ENSP00000340896 |
| ENSP00000196551 | ENSP00000341243 |
| ENSP00000196551 | ENSP00000341692 |
| ENSP00000196551 | ENSP00000341885 |
| ENSP00000196551 | ENSP00000342889 |
| ENSP00000196551 | ENSP00000345156 |
| ENSP00000196551 | ENSP00000346015 |
| ENSP00000196551 | ENSP00000346022 |
| ENSP00000196551 | ENSP00000346027 |
| ENSP00000196551 | ENSP00000346037 |
| ENSP00000196551 | ENSP00000346050 |
| ENSP00000196551 | ENSP00000346067 |
| ENSP00000196551 | ENSP00000346453 |
| ENSP00000196551 | ENSP00000347087 |
| ENSP00000196551 | ENSP00000349959 |
| ENSP00000196551 | ENSP00000351596 |
| ENSP00000196551 | ENSP00000352706 |
| ENSP00000196551 | ENSP00000354525 |
| ENSP00000196551 | ENSP00000354739 |
| ENSP00000196551 | ENSP00000355471 |
| ENSP00000196551 | ENSP00000355890 |
| ENSP00000196551 | ENSP00000356134 |
| ENSP00000196551 | ENSP00000357480 |
| ENSP00000196551 | ENSP00000358854 |
| ENSP00000196551 | ENSP00000359345 |
| ENSP00000196551 | ENSP00000361076 |
| ENSP00000196551 | ENSP00000361206 |
| ENSP00000196551 | ENSP00000361465 |
| ENSP00000196551 | ENSP00000362036 |
| ENSP00000196551 | ENSP00000362208 |
| ENSP00000196551 | ENSP00000362306 |
| ENSP00000196551 | ENSP00000362688 |
| ENSP00000196551 | ENSP00000362744 |
| ENSP00000196551 | ENSP00000362993 |
| ENSP00000196551 | ENSP00000363018 |
| ENSP00000196551 | ENSP00000363250 |
| ENSP00000196551 | ENSP00000363308 |
| ENSP00000196551 | ENSP00000363676 |
| ENSP00000196551 | ENSP00000363944 |
| ENSP00000196551 | ENSP00000364320 |
| ENSP00000196551 | ENSP00000367923 |
| ENSP00000196551 | ENSP00000368790 |



|                 |                 |
|-----------------|-----------------|
| ENSP00000196551 | ENSP00000368927 |
| ENSP00000196551 | ENSP00000369757 |
| ENSP00000196551 | ENSP00000370589 |
| ENSP00000196551 | ENSP00000372445 |
| ENSP00000196551 | ENSP00000373404 |
| ENSP00000196551 | ENSP00000374566 |
| ENSP00000196551 | ENSP00000375730 |
| ENSP00000196551 | ENSP00000377640 |
| ENSP00000196551 | ENSP00000379339 |
| ENSP00000196551 | ENSP00000379888 |
| ENSP00000196551 | ENSP00000380156 |
| ENSP00000196551 | ENSP00000386717 |
| ENSP00000196551 | ENSP00000389103 |
| ENSP00000196551 | ENSP00000392270 |
| ENSP00000196551 | ENSP00000393241 |
| ENSP00000196551 | ENSP00000402338 |
| ENSP00000196551 | ENSP00000403175 |
| ENSP00000196551 | ENSP00000412583 |
| ENSP00000196551 | ENSP00000414321 |
| ENSP00000196551 | ENSP00000416110 |
| ENSP00000196551 | ENSP00000418661 |
| ENSP00000196551 | ENSP00000420714 |
| ENSP00000198536 | ENSP00000230431 |
| ENSP00000198536 | ENSP00000340944 |
| ENSP00000198536 | ENSP00000355136 |
| ENSP00000198536 | ENSP00000359403 |
| ENSP00000198767 | ENSP00000222567 |
| ENSP00000198767 | ENSP00000246802 |
| ENSP00000198767 | ENSP00000262643 |
| ENSP00000198767 | ENSP00000263663 |
| ENSP00000198767 | ENSP00000263857 |
| ENSP00000198767 | ENSP00000263974 |
| ENSP00000198767 | ENSP00000298746 |
| ENSP00000198767 | ENSP00000302640 |
| ENSP00000198767 | ENSP00000312735 |
| ENSP00000198767 | ENSP00000314971 |
| ENSP00000198767 | ENSP00000322570 |
| ENSP00000198767 | ENSP00000322706 |
| ENSP00000198767 | ENSP00000327072 |
| ENSP00000198767 | ENSP00000351697 |
| ENSP00000198767 | ENSP00000358563 |
| ENSP00000198767 | ENSP00000361982 |
| ENSP00000198767 | ENSP00000367029 |
| ENSP00000198767 | ENSP00000368349 |
| ENSP00000198767 | ENSP00000416892 |
| ENSP00000199320 | ENSP00000211372 |

|                 |                 |
|-----------------|-----------------|
| ENSP00000199320 | ENSP00000229214 |
| ENSP00000199320 | ENSP00000230340 |
| ENSP00000199320 | ENSP00000232888 |
| ENSP00000199320 | ENSP00000241600 |
| ENSP00000199320 | ENSP00000244230 |
| ENSP00000199320 | ENSP00000245539 |
| ENSP00000199320 | ENSP00000247219 |
| ENSP00000199320 | ENSP00000253083 |
| ENSP00000199320 | ENSP00000254037 |
| ENSP00000199320 | ENSP00000254928 |
| ENSP00000199320 | ENSP00000256031 |
| ENSP00000199320 | ENSP00000258455 |
| ENSP00000199320 | ENSP00000259750 |
| ENSP00000199320 | ENSP00000261637 |
| ENSP00000199320 | ENSP00000261708 |
| ENSP00000199320 | ENSP00000263657 |
| ENSP00000199320 | ENSP00000265537 |
| ENSP00000199320 | ENSP00000267425 |
| ENSP00000199320 | ENSP00000268802 |
| ENSP00000199320 | ENSP00000269385 |
| ENSP00000199320 | ENSP00000270625 |
| ENSP00000199320 | ENSP00000272418 |
| ENSP00000199320 | ENSP00000272521 |
| ENSP00000199320 | ENSP00000278572 |
| ENSP00000199320 | ENSP00000283109 |
| ENSP00000199320 | ENSP00000291576 |
| ENSP00000199320 | ENSP00000296674 |
| ENSP00000199320 | ENSP00000296792 |
| ENSP00000199320 | ENSP00000297990 |
| ENSP00000199320 | ENSP00000301364 |
| ENSP00000199320 | ENSP00000301962 |
| ENSP00000199320 | ENSP00000302896 |
| ENSP00000199320 | ENSP00000308179 |
| ENSP00000199320 | ENSP00000311028 |
| ENSP00000199320 | ENSP00000314193 |
| ENSP00000199320 | ENSP00000317376 |
| ENSP00000199320 | ENSP00000318646 |
| ENSP00000199320 | ENSP00000326981 |
| ENSP00000199320 | ENSP00000327179 |
| ENSP00000199320 | ENSP00000328854 |
| ENSP00000199320 | ENSP00000336712 |
| ENSP00000199320 | ENSP00000341885 |
| ENSP00000199320 | ENSP00000342381 |
| ENSP00000199320 | ENSP00000346067 |
| ENSP00000199320 | ENSP00000355541 |
| ENSP00000199320 | ENSP00000356548 |

|                 |                 |
|-----------------|-----------------|
| ENSP00000199320 | ENSP00000360031 |
| ENSP00000199320 | ENSP00000362036 |
| ENSP00000199320 | ENSP00000363746 |
| ENSP00000199320 | ENSP00000364320 |
| ENSP00000199320 | ENSP00000364847 |
| ENSP00000199320 | ENSP00000370968 |
| ENSP00000199320 | ENSP00000372695 |
| ENSP00000199320 | ENSP00000377954 |
| ENSP00000199320 | ENSP00000379339 |
| ENSP00000199320 | ENSP00000379607 |
| ENSP00000199320 | ENSP00000384302 |
| ENSP00000199320 | ENSP00000393241 |
| ENSP00000199320 | ENSP00000399454 |
| ENSP00000199320 | ENSP00000402869 |
| ENSP00000199320 | ENSP00000403175 |
| ENSP00000199320 | ENSP00000405614 |
| ENSP00000199320 | ENSP00000412583 |
| ENSP00000199320 | ENSP00000416110 |
| ENSP00000199320 | ENSP00000420714 |
| ENSP00000199389 | ENSP00000203001 |
| ENSP00000199389 | ENSP00000216554 |
| ENSP00000199389 | ENSP00000222005 |
| ENSP00000199389 | ENSP00000229595 |
| ENSP00000199389 | ENSP00000233057 |
| ENSP00000199389 | ENSP00000251038 |
| ENSP00000199389 | ENSP00000256383 |
| ENSP00000199389 | ENSP00000259750 |
| ENSP00000199389 | ENSP00000261845 |
| ENSP00000199389 | ENSP00000266079 |
| ENSP00000199389 | ENSP00000266126 |
| ENSP00000199389 | ENSP00000273783 |
| ENSP00000199389 | ENSP00000284202 |
| ENSP00000199389 | ENSP00000289371 |
| ENSP00000199389 | ENSP00000298532 |
| ENSP00000199389 | ENSP00000298746 |
| ENSP00000199389 | ENSP00000300648 |
| ENSP00000199389 | ENSP00000302801 |
| ENSP00000199389 | ENSP00000303315 |
| ENSP00000199389 | ENSP00000304350 |
| ENSP00000199389 | ENSP00000310448 |
| ENSP00000199389 | ENSP00000310649 |
| ENSP00000199389 | ENSP00000311005 |
| ENSP00000199389 | ENSP00000313603 |
| ENSP00000199389 | ENSP00000313674 |
| ENSP00000199389 | ENSP00000323302 |
| ENSP00000199389 | ENSP00000324122 |

|                 |                 |
|-----------------|-----------------|
| ENSP00000199389 | ENSP00000325448 |
| ENSP00000199389 | ENSP00000331310 |
| ENSP00000199389 | ENSP00000331817 |
| ENSP00000199389 | ENSP00000336702 |
| ENSP00000199389 | ENSP00000342381 |
| ENSP00000199389 | ENSP00000344220 |
| ENSP00000199389 | ENSP00000352738 |
| ENSP00000199389 | ENSP00000353575 |
| ENSP00000199389 | ENSP00000355884 |
| ENSP00000199389 | ENSP00000356548 |
| ENSP00000199389 | ENSP00000363308 |
| ENSP00000199389 | ENSP00000363313 |
| ENSP00000199389 | ENSP00000369042 |
| ENSP00000199389 | ENSP00000370258 |
| ENSP00000199389 | ENSP00000373082 |
| ENSP00000199389 | ENSP00000374399 |
| ENSP00000199389 | ENSP00000389065 |
| ENSP00000199389 | ENSP00000394869 |
| ENSP00000199389 | ENSP00000411327 |
| ENSP00000199389 | ENSP00000412553 |
| ENSP00000199389 | ENSP00000413319 |
| ENSP00000199389 | ENSP00000414373 |
| ENSP00000199389 | ENSP00000417229 |
| ENSP00000199447 | ENSP00000216185 |
| ENSP00000199447 | ENSP00000217515 |
| ENSP00000199447 | ENSP00000241052 |
| ENSP00000199447 | ENSP00000242576 |
| ENSP00000199447 | ENSP00000252487 |
| ENSP00000199447 | ENSP00000264065 |
| ENSP00000199447 | ENSP00000265462 |
| ENSP00000199447 | ENSP00000304668 |
| ENSP00000199447 | ENSP00000304908 |
| ENSP00000199447 | ENSP00000313921 |
| ENSP00000199447 | ENSP00000342026 |
| ENSP00000199447 | ENSP00000369757 |
| ENSP00000199447 | ENSP00000381293 |
| ENSP00000199448 | ENSP00000374455 |
| ENSP00000199706 | ENSP00000261908 |
| ENSP00000199706 | ENSP00000301585 |
| ENSP00000199706 | ENSP00000376204 |
| ENSP00000199706 | ENSP00000396622 |
| ENSP00000199814 | ENSP00000215829 |
| ENSP00000199814 | ENSP00000221232 |
| ENSP00000199814 | ENSP00000222969 |
| ENSP00000199814 | ENSP00000227524 |
| ENSP00000199814 | ENSP00000236273 |

|                 |                 |
|-----------------|-----------------|
| ENSP00000199814 | ENSP00000253108 |
| ENSP00000199814 | ENSP00000254193 |
| ENSP00000199814 | ENSP00000261531 |
| ENSP00000199814 | ENSP00000263657 |
| ENSP00000199814 | ENSP00000264233 |
| ENSP00000199814 | ENSP00000266735 |
| ENSP00000199814 | ENSP00000267812 |
| ENSP00000199814 | ENSP00000268482 |
| ENSP00000199814 | ENSP00000294053 |
| ENSP00000199814 | ENSP00000295373 |
| ENSP00000199814 | ENSP00000295488 |
| ENSP00000199814 | ENSP00000296215 |
| ENSP00000199814 | ENSP00000296702 |
| ENSP00000199814 | ENSP00000297151 |
| ENSP00000199814 | ENSP00000298532 |
| ENSP00000199814 | ENSP00000301740 |
| ENSP00000199814 | ENSP00000302160 |
| ENSP00000199814 | ENSP00000303191 |
| ENSP00000199814 | ENSP00000304350 |
| ENSP00000199814 | ENSP00000304370 |
| ENSP00000199814 | ENSP00000309166 |
| ENSP00000199814 | ENSP00000310448 |
| ENSP00000199814 | ENSP00000313674 |
| ENSP00000199814 | ENSP00000326531 |
| ENSP00000199814 | ENSP00000326806 |
| ENSP00000199814 | ENSP00000328992 |
| ENSP00000199814 | ENSP00000329419 |
| ENSP00000199814 | ENSP00000331907 |
| ENSP00000199814 | ENSP00000332103 |
| ENSP00000199814 | ENSP00000334148 |
| ENSP00000199814 | ENSP00000339090 |
| ENSP00000199814 | ENSP00000342374 |
| ENSP00000199814 | ENSP00000343557 |
| ENSP00000199814 | ENSP00000344758 |
| ENSP00000199814 | ENSP00000351137 |
| ENSP00000199814 | ENSP00000351492 |
| ENSP00000199814 | ENSP00000357048 |
| ENSP00000199814 | ENSP00000357631 |
| ENSP00000199814 | ENSP00000358554 |
| ENSP00000199814 | ENSP00000359454 |
| ENSP00000199814 | ENSP00000360532 |
| ENSP00000199814 | ENSP00000361577 |
| ENSP00000199814 | ENSP00000362592 |
| ENSP00000199814 | ENSP00000362688 |
| ENSP00000199814 | ENSP00000366557 |
| ENSP00000199814 | ENSP00000370258 |

|                 |                 |
|-----------------|-----------------|
| ENSP00000199814 | ENSP00000375863 |
| ENSP00000199814 | ENSP00000376973 |
| ENSP00000199814 | ENSP00000379607 |
| ENSP00000199814 | ENSP00000380336 |
| ENSP00000199814 | ENSP00000387006 |
| ENSP00000199814 | ENSP00000393953 |
| ENSP00000199814 | ENSP00000404151 |
| ENSP00000199814 | ENSP00000412566 |
| ENSP00000199814 | ENSP00000416959 |
| ENSP00000200135 | ENSP00000220659 |
| ENSP00000200135 | ENSP00000223369 |
| ENSP00000200135 | ENSP00000257700 |
| ENSP00000200135 | ENSP00000261597 |
| ENSP00000200135 | ENSP00000262812 |
| ENSP00000200135 | ENSP00000264028 |
| ENSP00000200135 | ENSP00000281513 |
| ENSP00000200135 | ENSP00000287598 |
| ENSP00000200135 | ENSP00000302530 |
| ENSP00000200135 | ENSP00000305810 |
| ENSP00000200135 | ENSP00000311429 |
| ENSP00000200135 | ENSP00000320130 |
| ENSP00000200135 | ENSP00000325002 |
| ENSP00000200135 | ENSP00000325863 |
| ENSP00000200135 | ENSP00000328236 |
| ENSP00000200135 | ENSP00000357048 |
| ENSP00000200135 | ENSP00000363055 |
| ENSP00000200135 | ENSP00000382562 |
| ENSP00000200135 | ENSP00000390783 |
| ENSP00000200135 | ENSP00000397394 |
| ENSP00000200135 | ENSP00000397435 |
| ENSP00000200135 | ENSP00000408910 |
| ENSP00000200181 | ENSP00000244769 |
| ENSP00000200181 | ENSP00000265354 |
| ENSP00000200181 | ENSP00000314879 |
| ENSP00000200181 | ENSP00000323856 |
| ENSP00000200181 | ENSP00000329797 |
| ENSP00000200181 | ENSP00000340937 |
| ENSP00000200181 | ENSP00000341189 |
| ENSP00000200181 | ENSP00000359596 |
| ENSP00000200181 | ENSP00000363559 |
| ENSP00000200453 | ENSP00000256383 |
| ENSP00000200453 | ENSP00000263121 |
| ENSP00000200453 | ENSP00000311825 |
| ENSP00000200453 | ENSP00000355001 |
| ENSP00000200453 | ENSP00000358953 |
| ENSP00000200453 | ENSP00000364398 |

|                 |                 |
|-----------------|-----------------|
| ENSP00000200676 | ENSP00000381031 |
| ENSP00000200691 | ENSP00000237014 |
| ENSP00000200691 | ENSP00000300086 |
| ENSP00000201586 | ENSP00000252699 |
| ENSP00000201586 | ENSP00000286190 |
| ENSP00000202773 | ENSP00000206249 |
| ENSP00000202773 | ENSP00000216554 |
| ENSP00000202773 | ENSP00000222247 |
| ENSP00000202773 | ENSP00000225430 |
| ENSP00000202773 | ENSP00000226796 |
| ENSP00000202773 | ENSP00000230050 |
| ENSP00000202773 | ENSP00000230859 |
| ENSP00000202773 | ENSP00000238112 |
| ENSP00000202773 | ENSP00000245539 |
| ENSP00000202773 | ENSP00000252543 |
| ENSP00000202773 | ENSP00000253099 |
| ENSP00000202773 | ENSP00000253788 |
| ENSP00000202773 | ENSP00000254037 |
| ENSP00000202773 | ENSP00000254940 |
| ENSP00000202773 | ENSP00000257829 |
| ENSP00000202773 | ENSP00000258455 |
| ENSP00000202773 | ENSP00000259469 |
| ENSP00000202773 | ENSP00000260102 |
| ENSP00000202773 | ENSP00000260443 |
| ENSP00000202773 | ENSP00000262584 |
| ENSP00000202773 | ENSP00000264995 |
| ENSP00000202773 | ENSP00000265100 |
| ENSP00000202773 | ENSP00000268616 |
| ENSP00000202773 | ENSP00000268661 |
| ENSP00000202773 | ENSP00000269499 |
| ENSP00000202773 | ENSP00000270625 |
| ENSP00000202773 | ENSP00000272418 |
| ENSP00000202773 | ENSP00000274242 |
| ENSP00000202773 | ENSP00000274606 |
| ENSP00000202773 | ENSP00000278572 |
| ENSP00000202773 | ENSP00000287038 |
| ENSP00000202773 | ENSP00000294189 |
| ENSP00000202773 | ENSP00000296490 |
| ENSP00000202773 | ENSP00000296674 |
| ENSP00000202773 | ENSP00000296802 |
| ENSP00000202773 | ENSP00000298283 |
| ENSP00000202773 | ENSP00000299767 |
| ENSP00000202773 | ENSP00000300151 |
| ENSP00000202773 | ENSP00000302896 |
| ENSP00000202773 | ENSP00000303315 |
| ENSP00000202773 | ENSP00000304353 |

|                 |                 |
|-----------------|-----------------|
| ENSP00000202773 | ENSP00000305702 |
| ENSP00000202773 | ENSP00000306548 |
| ENSP00000202773 | ENSP00000307889 |
| ENSP00000202773 | ENSP00000308897 |
| ENSP00000202773 | ENSP00000309334 |
| ENSP00000202773 | ENSP00000309830 |
| ENSP00000202773 | ENSP00000311028 |
| ENSP00000202773 | ENSP00000311430 |
| ENSP00000202773 | ENSP00000314348 |
| ENSP00000202773 | ENSP00000315791 |
| ENSP00000202773 | ENSP00000317376 |
| ENSP00000202773 | ENSP00000318646 |
| ENSP00000202773 | ENSP00000322419 |
| ENSP00000202773 | ENSP00000326981 |
| ENSP00000202773 | ENSP00000328690 |
| ENSP00000202773 | ENSP00000329466 |
| ENSP00000202773 | ENSP00000332444 |
| ENSP00000202773 | ENSP00000336702 |
| ENSP00000202773 | ENSP00000337053 |
| ENSP00000202773 | ENSP00000337839 |
| ENSP00000202773 | ENSP00000338862 |
| ENSP00000202773 | ENSP00000339095 |
| ENSP00000202773 | ENSP00000339795 |
| ENSP00000202773 | ENSP00000340019 |
| ENSP00000202773 | ENSP00000341885 |
| ENSP00000202773 | ENSP00000345096 |
| ENSP00000202773 | ENSP00000345156 |
| ENSP00000202773 | ENSP00000346015 |
| ENSP00000202773 | ENSP00000346022 |
| ENSP00000202773 | ENSP00000346027 |
| ENSP00000202773 | ENSP00000346037 |
| ENSP00000202773 | ENSP00000346050 |
| ENSP00000202773 | ENSP00000346088 |
| ENSP00000202773 | ENSP00000346120 |
| ENSP00000202773 | ENSP00000346725 |
| ENSP00000202773 | ENSP00000347087 |
| ENSP00000202773 | ENSP00000348010 |
| ENSP00000202773 | ENSP00000350708 |
| ENSP00000202773 | ENSP00000354040 |
| ENSP00000202773 | ENSP00000354525 |
| ENSP00000202773 | ENSP00000354687 |
| ENSP00000202773 | ENSP00000354739 |
| ENSP00000202773 | ENSP00000355899 |
| ENSP00000202773 | ENSP00000357748 |
| ENSP00000202773 | ENSP00000359127 |
| ENSP00000202773 | ENSP00000359345 |



|                 |                 |
|-----------------|-----------------|
| ENSP00000202773 | ENSP00000360286 |
| ENSP00000202773 | ENSP00000360922 |
| ENSP00000202773 | ENSP00000361076 |
| ENSP00000202773 | ENSP00000362744 |
| ENSP00000202773 | ENSP00000363018 |
| ENSP00000202773 | ENSP00000363559 |
| ENSP00000202773 | ENSP00000363676 |
| ENSP00000202773 | ENSP00000364320 |
| ENSP00000202773 | ENSP00000366519 |
| ENSP00000202773 | ENSP00000369757 |
| ENSP00000202773 | ENSP00000370083 |
| ENSP00000202773 | ENSP00000370589 |
| ENSP00000202773 | ENSP00000373404 |
| ENSP00000202773 | ENSP00000374390 |
| ENSP00000202773 | ENSP00000375730 |
| ENSP00000202773 | ENSP00000377640 |
| ENSP00000202773 | ENSP00000377865 |
| ENSP00000202773 | ENSP00000378160 |
| ENSP00000202773 | ENSP00000379607 |
| ENSP00000202773 | ENSP00000379888 |
| ENSP00000202773 | ENSP00000380156 |
| ENSP00000202773 | ENSP00000380982 |
| ENSP00000202773 | ENSP00000382392 |
| ENSP00000202773 | ENSP00000386717 |
| ENSP00000202773 | ENSP00000389103 |
| ENSP00000202773 | ENSP00000391723 |
| ENSP00000202773 | ENSP00000392859 |
| ENSP00000202773 | ENSP00000393393 |
| ENSP00000202773 | ENSP00000402338 |
| ENSP00000202773 | ENSP00000414321 |
| ENSP00000202816 | ENSP00000226796 |
| ENSP00000202816 | ENSP00000229214 |
| ENSP00000202816 | ENSP00000246802 |
| ENSP00000202816 | ENSP00000250615 |
| ENSP00000202816 | ENSP00000252115 |
| ENSP00000202816 | ENSP00000257527 |
| ENSP00000202816 | ENSP00000263657 |
| ENSP00000202816 | ENSP00000264995 |
| ENSP00000202816 | ENSP00000267425 |
| ENSP00000202816 | ENSP00000268661 |
| ENSP00000202816 | ENSP00000270625 |
| ENSP00000202816 | ENSP00000274606 |
| ENSP00000202816 | ENSP00000274849 |
| ENSP00000202816 | ENSP00000278572 |
| ENSP00000202816 | ENSP00000282999 |
| ENSP00000202816 | ENSP00000291576 |

|                 |                 |
|-----------------|-----------------|
| ENSP00000202816 | ENSP00000297990 |
| ENSP00000202816 | ENSP00000298283 |
| ENSP00000202816 | ENSP00000298746 |
| ENSP00000202816 | ENSP00000314311 |
| ENSP00000202816 | ENSP00000314348 |
| ENSP00000202816 | ENSP00000318195 |
| ENSP00000202816 | ENSP00000322396 |
| ENSP00000202816 | ENSP00000324122 |
| ENSP00000202816 | ENSP00000327179 |
| ENSP00000202816 | ENSP00000329466 |
| ENSP00000202816 | ENSP00000331817 |
| ENSP00000202816 | ENSP00000332340 |
| ENSP00000202816 | ENSP00000339795 |
| ENSP00000202816 | ENSP00000340823 |
| ENSP00000202816 | ENSP00000341885 |
| ENSP00000202816 | ENSP00000355541 |
| ENSP00000202816 | ENSP00000356290 |
| ENSP00000202816 | ENSP00000358563 |
| ENSP00000202816 | ENSP00000358812 |
| ENSP00000202816 | ENSP00000361982 |
| ENSP00000202816 | ENSP00000364320 |
| ENSP00000202816 | ENSP00000370589 |
| ENSP00000202816 | ENSP00000371101 |
| ENSP00000202816 | ENSP00000380982 |
| ENSP00000202816 | ENSP00000384490 |
| ENSP00000202816 | ENSP00000388920 |
| ENSP00000202816 | ENSP00000420357 |
| ENSP00000203001 | ENSP00000220496 |
| ENSP00000203001 | ENSP00000232905 |
| ENSP00000203001 | ENSP00000248553 |
| ENSP00000203001 | ENSP00000260956 |
| ENSP00000203001 | ENSP00000263791 |
| ENSP00000203001 | ENSP00000266126 |
| ENSP00000203001 | ENSP00000280557 |
| ENSP00000203001 | ENSP00000282728 |
| ENSP00000203001 | ENSP00000304668 |
| ENSP00000203001 | ENSP00000314311 |
| ENSP00000203001 | ENSP00000323424 |
| ENSP00000203001 | ENSP00000323880 |
| ENSP00000203001 | ENSP00000354125 |
| ENSP00000203001 | ENSP00000361010 |
| ENSP00000203001 | ENSP00000362688 |
| ENSP00000203001 | ENSP00000364543 |
| ENSP00000203001 | ENSP00000372827 |
| ENSP00000203001 | ENSP00000374399 |
| ENSP00000203001 | ENSP00000377344 |

|                 |                 |
|-----------------|-----------------|
| ENSP00000203001 | ENSP00000389182 |
| ENSP00000203001 | ENSP00000394400 |
| ENSP00000203001 | ENSP00000394869 |
| ENSP00000203001 | ENSP00000399530 |
| ENSP00000203001 | ENSP00000400626 |
| ENSP00000203001 | ENSP00000412310 |
| ENSP00000203001 | ENSP00000417229 |
| ENSP00000203629 | ENSP00000234170 |
| ENSP00000203629 | ENSP00000371308 |
| ENSP00000204517 | ENSP00000417281 |
| ENSP00000204549 | ENSP00000278919 |
| ENSP00000204549 | ENSP00000358605 |
| ENSP00000204566 | ENSP00000222008 |
| ENSP00000204566 | ENSP00000222330 |
| ENSP00000204566 | ENSP00000257787 |
| ENSP00000204566 | ENSP00000267484 |
| ENSP00000204566 | ENSP00000337838 |
| ENSP00000204566 | ENSP00000359507 |
| ENSP00000204566 | ENSP00000363985 |
| ENSP00000204604 | ENSP00000219551 |
| ENSP00000204604 | ENSP00000226574 |
| ENSP00000204604 | ENSP00000232003 |
| ENSP00000204604 | ENSP00000262120 |
| ENSP00000204604 | ENSP00000283147 |
| ENSP00000204604 | ENSP00000288840 |
| ENSP00000204604 | ENSP00000295025 |
| ENSP00000204604 | ENSP00000321326 |
| ENSP00000204604 | ENSP00000341551 |
| ENSP00000204615 | ENSP00000358105 |
| ENSP00000204615 | ENSP00000361548 |
| ENSP00000204637 | ENSP00000225430 |
| ENSP00000204637 | ENSP00000228280 |
| ENSP00000204637 | ENSP00000230050 |
| ENSP00000204637 | ENSP00000241453 |
| ENSP00000204637 | ENSP00000253099 |
| ENSP00000204637 | ENSP00000259469 |
| ENSP00000204637 | ENSP00000260102 |
| ENSP00000204637 | ENSP00000260443 |
| ENSP00000204637 | ENSP00000262584 |
| ENSP00000204637 | ENSP00000264995 |
| ENSP00000204637 | ENSP00000265100 |
| ENSP00000204637 | ENSP00000268661 |
| ENSP00000204637 | ENSP00000274242 |
| ENSP00000204637 | ENSP00000274606 |
| ENSP00000204637 | ENSP00000287038 |
| ENSP00000204637 | ENSP00000298283 |

|                 |                 |
|-----------------|-----------------|
| ENSP00000204637 | ENSP00000300151 |
| ENSP00000204637 | ENSP00000308897 |
| ENSP00000204637 | ENSP00000309334 |
| ENSP00000204637 | ENSP00000311430 |
| ENSP00000204637 | ENSP00000346015 |
| ENSP00000204637 | ENSP00000346022 |
| ENSP00000204637 | ENSP00000354525 |
| ENSP00000204637 | ENSP00000354739 |
| ENSP00000204637 | ENSP00000359345 |
| ENSP00000204637 | ENSP00000361076 |
| ENSP00000204637 | ENSP00000363676 |
| ENSP00000204637 | ENSP00000364320 |
| ENSP00000204637 | ENSP00000373404 |
| ENSP00000204637 | ENSP00000377640 |
| ENSP00000204637 | ENSP00000380156 |
| ENSP00000204637 | ENSP00000386717 |
| ENSP00000204679 | ENSP00000262803 |
| ENSP00000204679 | ENSP00000332887 |
| ENSP00000204679 | ENSP00000364188 |
| ENSP00000204679 | ENSP00000369335 |
| ENSP00000204679 | ENSP00000369965 |
| ENSP00000204679 | ENSP00000403817 |
| ENSP00000204726 | ENSP00000299424 |
| ENSP00000204726 | ENSP00000312664 |
| ENSP00000204726 | ENSP00000339435 |
| ENSP00000204726 | ENSP00000355599 |
| ENSP00000204726 | ENSP00000355777 |
| ENSP00000204726 | ENSP00000357484 |
| ENSP00000204726 | ENSP00000381045 |
| ENSP00000204961 | ENSP00000233154 |
| ENSP00000204961 | ENSP00000259406 |
| ENSP00000204961 | ENSP00000260130 |
| ENSP00000204961 | ENSP00000311005 |
| ENSP00000204961 | ENSP00000326366 |
| ENSP00000204961 | ENSP00000348550 |
| ENSP00000204961 | ENSP00000349465 |
| ENSP00000204961 | ENSP00000355136 |
| ENSP00000204961 | ENSP00000363763 |
| ENSP00000204961 | ENSP00000370410 |
| ENSP00000204961 | ENSP00000381098 |
| ENSP00000204961 | ENSP00000392423 |
| ENSP00000204961 | ENSP00000394794 |
| ENSP00000205194 | ENSP00000222008 |
| ENSP00000205194 | ENSP00000223273 |
| ENSP00000205214 | ENSP00000206595 |
| ENSP00000205214 | ENSP00000209875 |

|                 |                 |
|-----------------|-----------------|
| ENSP00000205214 | ENSP00000216133 |
| ENSP00000205214 | ENSP00000229595 |
| ENSP00000205214 | ENSP00000240055 |
| ENSP00000205214 | ENSP00000246112 |
| ENSP00000205214 | ENSP00000252029 |
| ENSP00000205214 | ENSP00000254900 |
| ENSP00000205214 | ENSP00000255631 |
| ENSP00000205214 | ENSP00000262144 |
| ENSP00000205214 | ENSP00000262518 |
| ENSP00000205214 | ENSP00000262803 |
| ENSP00000205214 | ENSP00000263360 |
| ENSP00000205214 | ENSP00000264705 |
| ENSP00000205214 | ENSP00000265195 |
| ENSP00000205214 | ENSP00000266744 |
| ENSP00000205214 | ENSP00000269385 |
| ENSP00000205214 | ENSP00000269397 |
| ENSP00000205214 | ENSP00000274031 |
| ENSP00000205214 | ENSP00000278618 |
| ENSP00000205214 | ENSP00000282030 |
| ENSP00000205214 | ENSP00000302216 |
| ENSP00000205214 | ENSP00000308750 |
| ENSP00000205214 | ENSP00000309457 |
| ENSP00000205214 | ENSP00000311825 |
| ENSP00000205214 | ENSP00000316578 |
| ENSP00000205214 | ENSP00000318646 |
| ENSP00000205214 | ENSP00000326477 |
| ENSP00000205214 | ENSP00000331057 |
| ENSP00000205214 | ENSP00000335044 |
| ENSP00000205214 | ENSP00000341280 |
| ENSP00000205214 | ENSP00000341805 |
| ENSP00000205214 | ENSP00000341992 |
| ENSP00000205214 | ENSP00000343885 |
| ENSP00000205214 | ENSP00000345096 |
| ENSP00000205214 | ENSP00000345445 |
| ENSP00000205214 | ENSP00000347169 |
| ENSP00000205214 | ENSP00000358417 |
| ENSP00000205214 | ENSP00000359321 |
| ENSP00000205214 | ENSP00000360515 |
| ENSP00000205214 | ENSP00000362344 |
| ENSP00000205214 | ENSP00000362592 |
| ENSP00000205214 | ENSP00000364289 |
| ENSP00000205214 | ENSP00000365735 |
| ENSP00000205214 | ENSP00000366135 |
| ENSP00000205214 | ENSP00000366953 |
| ENSP00000205214 | ENSP00000369042 |
| ENSP00000205214 | ENSP00000369335 |

|                 |                 |
|-----------------|-----------------|
| ENSP00000205214 | ENSP00000376204 |
| ENSP00000205214 | ENSP00000381436 |
| ENSP00000205214 | ENSP00000382688 |
| ENSP00000205214 | ENSP00000383295 |
| ENSP00000205214 | ENSP00000384490 |
| ENSP00000205214 | ENSP00000387982 |
| ENSP00000205214 | ENSP00000393275 |
| ENSP00000205214 | ENSP00000404658 |
| ENSP00000205890 | ENSP00000281172 |
| ENSP00000205890 | ENSP00000354623 |
| ENSP00000205890 | ENSP00000356694 |
| ENSP00000205890 | ENSP00000410833 |
| ENSP00000205948 | ENSP00000263816 |
| ENSP00000205948 | ENSP00000317872 |
| ENSP00000205948 | ENSP00000321334 |
| ENSP00000205948 | ENSP00000364709 |
| ENSP00000206020 | ENSP00000379282 |
| ENSP00000206020 | ENSP00000390746 |
| ENSP00000206249 | ENSP00000212015 |
| ENSP00000206249 | ENSP00000216037 |
| ENSP00000206249 | ENSP00000216297 |
| ENSP00000206249 | ENSP00000217130 |
| ENSP00000206249 | ENSP00000219431 |
| ENSP00000206249 | ENSP00000219476 |
| ENSP00000206249 | ENSP00000219548 |
| ENSP00000206249 | ENSP00000220764 |
| ENSP00000206249 | ENSP00000222247 |
| ENSP00000206249 | ENSP00000222254 |
| ENSP00000206249 | ENSP00000223073 |
| ENSP00000206249 | ENSP00000223641 |
| ENSP00000206249 | ENSP00000224073 |
| ENSP00000206249 | ENSP00000225430 |
| ENSP00000206249 | ENSP00000225916 |
| ENSP00000206249 | ENSP00000225983 |
| ENSP00000206249 | ENSP00000226574 |
| ENSP00000206249 | ENSP00000227507 |
| ENSP00000206249 | ENSP00000228251 |
| ENSP00000206249 | ENSP00000228534 |
| ENSP00000206249 | ENSP00000229595 |
| ENSP00000206249 | ENSP00000230050 |
| ENSP00000206249 | ENSP00000233146 |
| ENSP00000206249 | ENSP00000234420 |
| ENSP00000206249 | ENSP00000235372 |
| ENSP00000206249 | ENSP00000237530 |
| ENSP00000206249 | ENSP00000240304 |
| ENSP00000206249 | ENSP00000241600 |

|                 |                 |
|-----------------|-----------------|
| ENSP00000206249 | ENSP00000242057 |
| ENSP00000206249 | ENSP00000242351 |
| ENSP00000206249 | ENSP00000244741 |
| ENSP00000206249 | ENSP00000245479 |
| ENSP00000206249 | ENSP00000245812 |
| ENSP00000206249 | ENSP00000245960 |
| ENSP00000206249 | ENSP00000248114 |
| ENSP00000206249 | ENSP00000249636 |
| ENSP00000206249 | ENSP00000250003 |
| ENSP00000206249 | ENSP00000251289 |
| ENSP00000206249 | ENSP00000251871 |
| ENSP00000206249 | ENSP00000252543 |
| ENSP00000206249 | ENSP00000252699 |
| ENSP00000206249 | ENSP00000253363 |
| ENSP00000206249 | ENSP00000254630 |
| ENSP00000206249 | ENSP00000254803 |
| ENSP00000206249 | ENSP00000256379 |
| ENSP00000206249 | ENSP00000256429 |
| ENSP00000206249 | ENSP00000256897 |
| ENSP00000206249 | ENSP00000257430 |
| ENSP00000206249 | ENSP00000257829 |
| ENSP00000206249 | ENSP00000258455 |
| ENSP00000206249 | ENSP00000258648 |
| ENSP00000206249 | ENSP00000259406 |
| ENSP00000206249 | ENSP00000260210 |
| ENSP00000206249 | ENSP00000260947 |
| ENSP00000206249 | ENSP00000261245 |
| ENSP00000206249 | ENSP00000261413 |
| ENSP00000206249 | ENSP00000261531 |
| ENSP00000206249 | ENSP00000261875 |
| ENSP00000206249 | ENSP00000261884 |
| ENSP00000206249 | ENSP00000261893 |
| ENSP00000206249 | ENSP00000262030 |
| ENSP00000206249 | ENSP00000262077 |
| ENSP00000206249 | ENSP00000262213 |
| ENSP00000206249 | ENSP00000262367 |
| ENSP00000206249 | ENSP00000262584 |
| ENSP00000206249 | ENSP00000262753 |
| ENSP00000206249 | ENSP00000262803 |
| ENSP00000206249 | ENSP00000263121 |
| ENSP00000206249 | ENSP00000263663 |
| ENSP00000206249 | ENSP00000264451 |
| ENSP00000206249 | ENSP00000264515 |
| ENSP00000206249 | ENSP00000264637 |
| ENSP00000206249 | ENSP00000265350 |
| ENSP00000206249 | ENSP00000265963 |

|                 |                 |
|-----------------|-----------------|
| ENSP00000206249 | ENSP00000266079 |
| ENSP00000206249 | ENSP00000267064 |
| ENSP00000206249 | ENSP00000268182 |
| ENSP00000206249 | ENSP00000269122 |
| ENSP00000206249 | ENSP00000269701 |
| ENSP00000206249 | ENSP00000270625 |
| ENSP00000206249 | ENSP00000271002 |
| ENSP00000206249 | ENSP00000274031 |
| ENSP00000206249 | ENSP00000274793 |
| ENSP00000206249 | ENSP00000278572 |
| ENSP00000206249 | ENSP00000282892 |
| ENSP00000206249 | ENSP00000283943 |
| ENSP00000206249 | ENSP00000284957 |
| ENSP00000206249 | ENSP00000285298 |
| ENSP00000206249 | ENSP00000286317 |
| ENSP00000206249 | ENSP00000286523 |
| ENSP00000206249 | ENSP00000287295 |
| ENSP00000206249 | ENSP00000287820 |
| ENSP00000206249 | ENSP00000290231 |
| ENSP00000206249 | ENSP00000292385 |
| ENSP00000206249 | ENSP00000294189 |
| ENSP00000206249 | ENSP00000296255 |
| ENSP00000206249 | ENSP00000296509 |
| ENSP00000206249 | ENSP00000296674 |
| ENSP00000206249 | ENSP00000296930 |
| ENSP00000206249 | ENSP00000297185 |
| ENSP00000206249 | ENSP00000297347 |
| ENSP00000206249 | ENSP00000299424 |
| ENSP00000206249 | ENSP00000300413 |
| ENSP00000206249 | ENSP00000300651 |
| ENSP00000206249 | ENSP00000301740 |
| ENSP00000206249 | ENSP00000302111 |
| ENSP00000206249 | ENSP00000302640 |
| ENSP00000206249 | ENSP00000302896 |
| ENSP00000206249 | ENSP00000303315 |
| ENSP00000206249 | ENSP00000305422 |
| ENSP00000206249 | ENSP00000306245 |
| ENSP00000206249 | ENSP00000307260 |
| ENSP00000206249 | ENSP00000307684 |
| ENSP00000206249 | ENSP00000307863 |
| ENSP00000206249 | ENSP00000307889 |
| ENSP00000206249 | ENSP00000309334 |
| ENSP00000206249 | ENSP00000309474 |
| ENSP00000206249 | ENSP00000310785 |
| ENSP00000206249 | ENSP00000311028 |
| ENSP00000206249 | ENSP00000311430 |



|                 |                 |
|-----------------|-----------------|
| ENSP00000206249 | ENSP00000311747 |
| ENSP00000206249 | ENSP00000312649 |
| ENSP00000206249 | ENSP00000313158 |
| ENSP00000206249 | ENSP00000313420 |
| ENSP00000206249 | ENSP00000313829 |
| ENSP00000206249 | ENSP00000314949 |
| ENSP00000206249 | ENSP00000315397 |
| ENSP00000206249 | ENSP00000316879 |
| ENSP00000206249 | ENSP00000317872 |
| ENSP00000206249 | ENSP00000318195 |
| ENSP00000206249 | ENSP00000318646 |
| ENSP00000206249 | ENSP00000321503 |
| ENSP00000206249 | ENSP00000322716 |
| ENSP00000206249 | ENSP00000323720 |
| ENSP00000206249 | ENSP00000323856 |
| ENSP00000206249 | ENSP00000323858 |
| ENSP00000206249 | ENSP00000323967 |
| ENSP00000206249 | ENSP00000323978 |
| ENSP00000206249 | ENSP00000324573 |
| ENSP00000206249 | ENSP00000324956 |
| ENSP00000206249 | ENSP00000325120 |
| ENSP00000206249 | ENSP00000325376 |
| ENSP00000206249 | ENSP00000325612 |
| ENSP00000206249 | ENSP00000326261 |
| ENSP00000206249 | ENSP00000326519 |
| ENSP00000206249 | ENSP00000326767 |
| ENSP00000206249 | ENSP00000327072 |
| ENSP00000206249 | ENSP00000327197 |
| ENSP00000206249 | ENSP00000327213 |
| ENSP00000206249 | ENSP00000328111 |
| ENSP00000206249 | ENSP00000328773 |
| ENSP00000206249 | ENSP00000329002 |
| ENSP00000206249 | ENSP00000329357 |
| ENSP00000206249 | ENSP00000333188 |
| ENSP00000206249 | ENSP00000333275 |
| ENSP00000206249 | ENSP00000333633 |
| ENSP00000206249 | ENSP00000335321 |
| ENSP00000206249 | ENSP00000336817 |
| ENSP00000206249 | ENSP00000337088 |
| ENSP00000206249 | ENSP00000337194 |
| ENSP00000206249 | ENSP00000337513 |
| ENSP00000206249 | ENSP00000338157 |
| ENSP00000206249 | ENSP00000338235 |
| ENSP00000206249 | ENSP00000338607 |
| ENSP00000206249 | ENSP00000338983 |
| ENSP00000206249 | ENSP00000339145 |

|                 |                 |
|-----------------|-----------------|
| ENSP00000206249 | ENSP00000339191 |
| ENSP00000206249 | ENSP00000339495 |
| ENSP00000206249 | ENSP00000339527 |
| ENSP00000206249 | ENSP00000339529 |
| ENSP00000206249 | ENSP00000339795 |
| ENSP00000206249 | ENSP00000340019 |
| ENSP00000206249 | ENSP00000340761 |
| ENSP00000206249 | ENSP00000340896 |
| ENSP00000206249 | ENSP00000341208 |
| ENSP00000206249 | ENSP00000341551 |
| ENSP00000206249 | ENSP00000341692 |
| ENSP00000206249 | ENSP00000341885 |
| ENSP00000206249 | ENSP00000342137 |
| ENSP00000206249 | ENSP00000342307 |
| ENSP00000206249 | ENSP00000342434 |
| ENSP00000206249 | ENSP00000344456 |
| ENSP00000206249 | ENSP00000344547 |
| ENSP00000206249 | ENSP00000345156 |
| ENSP00000206249 | ENSP00000345179 |
| ENSP00000206249 | ENSP00000345917 |
| ENSP00000206249 | ENSP00000346015 |
| ENSP00000206249 | ENSP00000346022 |
| ENSP00000206249 | ENSP00000346027 |
| ENSP00000206249 | ENSP00000346050 |
| ENSP00000206249 | ENSP00000346067 |
| ENSP00000206249 | ENSP00000346088 |
| ENSP00000206249 | ENSP00000346120 |
| ENSP00000206249 | ENSP00000346206 |
| ENSP00000206249 | ENSP00000346634 |
| ENSP00000206249 | ENSP00000347733 |
| ENSP00000206249 | ENSP00000347948 |
| ENSP00000206249 | ENSP00000348069 |
| ENSP00000206249 | ENSP00000348128 |
| ENSP00000206249 | ENSP00000348551 |
| ENSP00000206249 | ENSP00000348610 |
| ENSP00000206249 | ENSP00000349049 |
| ENSP00000206249 | ENSP00000349977 |
| ENSP00000206249 | ENSP00000350283 |
| ENSP00000206249 | ENSP00000350512 |
| ENSP00000206249 | ENSP00000350854 |
| ENSP00000206249 | ENSP00000350894 |
| ENSP00000206249 | ENSP00000351407 |
| ENSP00000206249 | ENSP00000351894 |
| ENSP00000206249 | ENSP00000352257 |
| ENSP00000206249 | ENSP00000352463 |
| ENSP00000206249 | ENSP00000352738 |

|                 |                 |
|-----------------|-----------------|
| ENSP00000206249 | ENSP00000353622 |
| ENSP00000206249 | ENSP00000354040 |
| ENSP00000206249 | ENSP00000354061 |
| ENSP00000206249 | ENSP00000354522 |
| ENSP00000206249 | ENSP00000354718 |
| ENSP00000206249 | ENSP00000354739 |
| ENSP00000206249 | ENSP00000355011 |
| ENSP00000206249 | ENSP00000355759 |
| ENSP00000206249 | ENSP00000356520 |
| ENSP00000206249 | ENSP00000357047 |
| ENSP00000206249 | ENSP00000357341 |
| ENSP00000206249 | ENSP00000357448 |
| ENSP00000206249 | ENSP00000357643 |
| ENSP00000206249 | ENSP00000357711 |
| ENSP00000206249 | ENSP00000358404 |
| ENSP00000206249 | ENSP00000358554 |
| ENSP00000206249 | ENSP00000358563 |
| ENSP00000206249 | ENSP00000358778 |
| ENSP00000206249 | ENSP00000358857 |
| ENSP00000206249 | ENSP00000358953 |
| ENSP00000206249 | ENSP00000358994 |
| ENSP00000206249 | ENSP00000359345 |
| ENSP00000206249 | ENSP00000359531 |
| ENSP00000206249 | ENSP00000359818 |
| ENSP00000206249 | ENSP00000360025 |
| ENSP00000206249 | ENSP00000360031 |
| ENSP00000206249 | ENSP00000360828 |
| ENSP00000206249 | ENSP00000360922 |
| ENSP00000206249 | ENSP00000361010 |
| ENSP00000206249 | ENSP00000361076 |
| ENSP00000206249 | ENSP00000361824 |
| ENSP00000206249 | ENSP00000362153 |
| ENSP00000206249 | ENSP00000362208 |
| ENSP00000206249 | ENSP00000362592 |
| ENSP00000206249 | ENSP00000362637 |
| ENSP00000206249 | ENSP00000362688 |
| ENSP00000206249 | ENSP00000362744 |
| ENSP00000206249 | ENSP00000362820 |
| ENSP00000206249 | ENSP00000363018 |
| ENSP00000206249 | ENSP00000363193 |
| ENSP00000206249 | ENSP00000363676 |
| ENSP00000206249 | ENSP00000363745 |
| ENSP00000206249 | ENSP00000364839 |
| ENSP00000206249 | ENSP00000364895 |
| ENSP00000206249 | ENSP00000364929 |
| ENSP00000206249 | ENSP00000365016 |

|                 |                 |
|-----------------|-----------------|
| ENSP00000206249 | ENSP00000365025 |
| ENSP00000206249 | ENSP00000365439 |
| ENSP00000206249 | ENSP00000366135 |
| ENSP00000206249 | ENSP00000366413 |
| ENSP00000206249 | ENSP00000366434 |
| ENSP00000206249 | ENSP00000366607 |
| ENSP00000206249 | ENSP00000366915 |
| ENSP00000206249 | ENSP00000367263 |
| ENSP00000206249 | ENSP00000367406 |
| ENSP00000206249 | ENSP00000367797 |
| ENSP00000206249 | ENSP00000368253 |
| ENSP00000206249 | ENSP00000369716 |
| ENSP00000206249 | ENSP00000369757 |
| ENSP00000206249 | ENSP00000369965 |
| ENSP00000206249 | ENSP00000370589 |
| ENSP00000206249 | ENSP00000370968 |
| ENSP00000206249 | ENSP00000374213 |
| ENSP00000206249 | ENSP00000375730 |
| ENSP00000206249 | ENSP00000375863 |
| ENSP00000206249 | ENSP00000376309 |
| ENSP00000206249 | ENSP00000376611 |
| ENSP00000206249 | ENSP00000377262 |
| ENSP00000206249 | ENSP00000377640 |
| ENSP00000206249 | ENSP00000377944 |
| ENSP00000206249 | ENSP00000379888 |
| ENSP00000206249 | ENSP00000380414 |
| ENSP00000206249 | ENSP00000381031 |
| ENSP00000206249 | ENSP00000381045 |
| ENSP00000206249 | ENSP00000381098 |
| ENSP00000206249 | ENSP00000382250 |
| ENSP00000206249 | ENSP00000382392 |
| ENSP00000206249 | ENSP00000382423 |
| ENSP00000206249 | ENSP00000382688 |
| ENSP00000206249 | ENSP00000384109 |
| ENSP00000206249 | ENSP00000384675 |
| ENSP00000206249 | ENSP00000385722 |
| ENSP00000206249 | ENSP00000389103 |
| ENSP00000206249 | ENSP00000392466 |
| ENSP00000206249 | ENSP00000392601 |
| ENSP00000206249 | ENSP00000396704 |
| ENSP00000206249 | ENSP00000399968 |
| ENSP00000206249 | ENSP00000401277 |
| ENSP00000206249 | ENSP00000404121 |
| ENSP00000206249 | ENSP00000406888 |
| ENSP00000206249 | ENSP00000407487 |
| ENSP00000206249 | ENSP00000407879 |

|                 |                 |
|-----------------|-----------------|
| ENSP00000206249 | ENSP00000414187 |
| ENSP00000206249 | ENSP00000414321 |
| ENSP00000206249 | ENSP00000416097 |
| ENSP00000206249 | ENSP00000416110 |
| ENSP00000206249 | ENSP00000417281 |
| ENSP00000206423 | ENSP00000379607 |
| ENSP00000206474 | ENSP00000243706 |
| ENSP00000206474 | ENSP00000253669 |
| ENSP00000206474 | ENSP00000260372 |
| ENSP00000206474 | ENSP00000282058 |
| ENSP00000206474 | ENSP00000369871 |
| ENSP00000206595 | ENSP00000263360 |
| ENSP00000206595 | ENSP00000269197 |
| ENSP00000206595 | ENSP00000282030 |
| ENSP00000206595 | ENSP00000283351 |
| ENSP00000206595 | ENSP00000376204 |
| ENSP00000206765 | ENSP00000233190 |
| ENSP00000206765 | ENSP00000248553 |
| ENSP00000206765 | ENSP00000338345 |
| ENSP00000206765 | ENSP00000361855 |
| ENSP00000207870 | ENSP00000251038 |
| ENSP00000207870 | ENSP00000264029 |
| ENSP00000207870 | ENSP00000264705 |
| ENSP00000207870 | ENSP00000330408 |
| ENSP00000207870 | ENSP00000360268 |
| ENSP00000209665 | ENSP00000317992 |
| ENSP00000209665 | ENSP00000358812 |
| ENSP00000209665 | ENSP00000360412 |
| ENSP00000209665 | ENSP00000366519 |
| ENSP00000209665 | ENSP00000366557 |
| ENSP00000209665 | ENSP00000379865 |
| ENSP00000209665 | ENSP00000382392 |
| ENSP00000209728 | ENSP00000209875 |
| ENSP00000209728 | ENSP00000212015 |
| ENSP00000209728 | ENSP00000216367 |
| ENSP00000209728 | ENSP00000219097 |
| ENSP00000209728 | ENSP00000225983 |
| ENSP00000209728 | ENSP00000229201 |
| ENSP00000209728 | ENSP00000229595 |
| ENSP00000209728 | ENSP00000234296 |
| ENSP00000209728 | ENSP00000237654 |
| ENSP00000209728 | ENSP00000238789 |
| ENSP00000209728 | ENSP00000241071 |
| ENSP00000209728 | ENSP00000244741 |
| ENSP00000209728 | ENSP00000245960 |
| ENSP00000209728 | ENSP00000247843 |

|                 |                 |
|-----------------|-----------------|
| ENSP00000209728 | ENSP00000251038 |
| ENSP00000209728 | ENSP00000251074 |
| ENSP00000209728 | ENSP00000251289 |
| ENSP00000209728 | ENSP00000256442 |
| ENSP00000209728 | ENSP00000257789 |
| ENSP00000209728 | ENSP00000257934 |
| ENSP00000209728 | ENSP00000259008 |
| ENSP00000209728 | ENSP00000261424 |
| ENSP00000209728 | ENSP00000261881 |
| ENSP00000209728 | ENSP00000262315 |
| ENSP00000209728 | ENSP00000262519 |
| ENSP00000209728 | ENSP00000262854 |
| ENSP00000209728 | ENSP00000263043 |
| ENSP00000209728 | ENSP00000263121 |
| ENSP00000209728 | ENSP00000263201 |
| ENSP00000209728 | ENSP00000263228 |
| ENSP00000209728 | ENSP00000264108 |
| ENSP00000209728 | ENSP00000264169 |
| ENSP00000209728 | ENSP00000264335 |
| ENSP00000209728 | ENSP00000264515 |
| ENSP00000209728 | ENSP00000264977 |
| ENSP00000209728 | ENSP00000265056 |
| ENSP00000209728 | ENSP00000265465 |
| ENSP00000209728 | ENSP00000267197 |
| ENSP00000209728 | ENSP00000269127 |
| ENSP00000209728 | ENSP00000269397 |
| ENSP00000209728 | ENSP00000276014 |
| ENSP00000209728 | ENSP00000276603 |
| ENSP00000209728 | ENSP00000278412 |
| ENSP00000209728 | ENSP00000278616 |
| ENSP00000209728 | ENSP00000281708 |
| ENSP00000209728 | ENSP00000282572 |
| ENSP00000209728 | ENSP00000287598 |
| ENSP00000209728 | ENSP00000288976 |
| ENSP00000209728 | ENSP00000295066 |
| ENSP00000209728 | ENSP00000295926 |
| ENSP00000209728 | ENSP00000295989 |
| ENSP00000209728 | ENSP00000296273 |
| ENSP00000209728 | ENSP00000296292 |
| ENSP00000209728 | ENSP00000296509 |
| ENSP00000209728 | ENSP00000296755 |
| ENSP00000209728 | ENSP00000297431 |
| ENSP00000209728 | ENSP00000298852 |
| ENSP00000209728 | ENSP00000300231 |
| ENSP00000209728 | ENSP00000301019 |
| ENSP00000209728 | ENSP00000302530 |

|                 |                 |
|-----------------|-----------------|
| ENSP00000209728 | ENSP00000306983 |
| ENSP00000209728 | ENSP00000307853 |
| ENSP00000209728 | ENSP00000310520 |
| ENSP00000209728 | ENSP00000310596 |
| ENSP00000209728 | ENSP00000311083 |
| ENSP00000209728 | ENSP00000312042 |
| ENSP00000209728 | ENSP00000313171 |
| ENSP00000209728 | ENSP00000318944 |
| ENSP00000209728 | ENSP00000323099 |
| ENSP00000209728 | ENSP00000323439 |
| ENSP00000209728 | ENSP00000324122 |
| ENSP00000209728 | ENSP00000325677 |
| ENSP00000209728 | ENSP00000325863 |
| ENSP00000209728 | ENSP00000326813 |
| ENSP00000209728 | ENSP00000329419 |
| ENSP00000209728 | ENSP00000333836 |
| ENSP00000209728 | ENSP00000334061 |
| ENSP00000209728 | ENSP00000335357 |
| ENSP00000209728 | ENSP00000336868 |
| ENSP00000209728 | ENSP00000340879 |
| ENSP00000209728 | ENSP00000340896 |
| ENSP00000209728 | ENSP00000341382 |
| ENSP00000209728 | ENSP00000343701 |
| ENSP00000209728 | ENSP00000343741 |
| ENSP00000209728 | ENSP00000344504 |
| ENSP00000209728 | ENSP00000345917 |
| ENSP00000209728 | ENSP00000346725 |
| ENSP00000209728 | ENSP00000347087 |
| ENSP00000209728 | ENSP00000347168 |
| ENSP00000209728 | ENSP00000348577 |
| ENSP00000209728 | ENSP00000349887 |
| ENSP00000209728 | ENSP00000350767 |
| ENSP00000209728 | ENSP00000351284 |
| ENSP00000209728 | ENSP00000353332 |
| ENSP00000209728 | ENSP00000353793 |
| ENSP00000209728 | ENSP00000354040 |
| ENSP00000209728 | ENSP00000354720 |
| ENSP00000209728 | ENSP00000354916 |
| ENSP00000209728 | ENSP00000354927 |
| ENSP00000209728 | ENSP00000355153 |
| ENSP00000209728 | ENSP00000355388 |
| ENSP00000209728 | ENSP00000356405 |
| ENSP00000209728 | ENSP00000356655 |
| ENSP00000209728 | ENSP00000360116 |
| ENSP00000209728 | ENSP00000360412 |
| ENSP00000209728 | ENSP00000360621 |

|                 |                 |
|-----------------|-----------------|
| ENSP00000209728 | ENSP00000364119 |
| ENSP00000209728 | ENSP00000365005 |
| ENSP00000209728 | ENSP00000365811 |
| ENSP00000209728 | ENSP00000366974 |
| ENSP00000209728 | ENSP00000367034 |
| ENSP00000209728 | ENSP00000368438 |
| ENSP00000209728 | ENSP00000368976 |
| ENSP00000209728 | ENSP00000369411 |
| ENSP00000209728 | ENSP00000369716 |
| ENSP00000209728 | ENSP00000370151 |
| ENSP00000209728 | ENSP00000370589 |
| ENSP00000209728 | ENSP00000371475 |
| ENSP00000209728 | ENSP00000372023 |
| ENSP00000209728 | ENSP00000376945 |
| ENSP00000209728 | ENSP00000377747 |
| ENSP00000209728 | ENSP00000378350 |
| ENSP00000209728 | ENSP00000378529 |
| ENSP00000209728 | ENSP00000381657 |
| ENSP00000209728 | ENSP00000382423 |
| ENSP00000209728 | ENSP00000383986 |
| ENSP00000209728 | ENSP00000384048 |
| ENSP00000209728 | ENSP00000384211 |
| ENSP00000209728 | ENSP00000392028 |
| ENSP00000209728 | ENSP00000402338 |
| ENSP00000209873 | ENSP00000295025 |
| ENSP00000209873 | ENSP00000360286 |
| ENSP00000209875 | ENSP00000212015 |
| ENSP00000209875 | ENSP00000216297 |
| ENSP00000209875 | ENSP00000225983 |
| ENSP00000209875 | ENSP00000229201 |
| ENSP00000209875 | ENSP00000234296 |
| ENSP00000209875 | ENSP00000243326 |
| ENSP00000209875 | ENSP00000245919 |
| ENSP00000209875 | ENSP00000247087 |
| ENSP00000209875 | ENSP00000252799 |
| ENSP00000209875 | ENSP00000252996 |
| ENSP00000209875 | ENSP00000256474 |
| ENSP00000209875 | ENSP00000257789 |
| ENSP00000209875 | ENSP00000259456 |
| ENSP00000209875 | ENSP00000260403 |
| ENSP00000209875 | ENSP00000260731 |
| ENSP00000209875 | ENSP00000262133 |
| ENSP00000209875 | ENSP00000262198 |
| ENSP00000209875 | ENSP00000263208 |
| ENSP00000209875 | ENSP00000263381 |
| ENSP00000209875 | ENSP00000263753 |



|                 |                 |
|-----------------|-----------------|
| ENSP00000209875 | ENSP00000263816 |
| ENSP00000209875 | ENSP00000264709 |
| ENSP00000209875 | ENSP00000265073 |
| ENSP00000209875 | ENSP00000265100 |
| ENSP00000209875 | ENSP00000267163 |
| ENSP00000209875 | ENSP00000267807 |
| ENSP00000209875 | ENSP00000269468 |
| ENSP00000209875 | ENSP00000271715 |
| ENSP00000209875 | ENSP00000272163 |
| ENSP00000209875 | ENSP00000277225 |
| ENSP00000209875 | ENSP00000278412 |
| ENSP00000209875 | ENSP00000282516 |
| ENSP00000209875 | ENSP00000284811 |
| ENSP00000209875 | ENSP00000287437 |
| ENSP00000209875 | ENSP00000287598 |
| ENSP00000209875 | ENSP00000296509 |
| ENSP00000209875 | ENSP00000299550 |
| ENSP00000209875 | ENSP00000300835 |
| ENSP00000209875 | ENSP00000301280 |
| ENSP00000209875 | ENSP00000301764 |
| ENSP00000209875 | ENSP00000307023 |
| ENSP00000209875 | ENSP00000309457 |
| ENSP00000209875 | ENSP00000312042 |
| ENSP00000209875 | ENSP00000315700 |
| ENSP00000209875 | ENSP00000316121 |
| ENSP00000209875 | ENSP00000316578 |
| ENSP00000209875 | ENSP00000318086 |
| ENSP00000209875 | ENSP00000318115 |
| ENSP00000209875 | ENSP00000319104 |
| ENSP00000209875 | ENSP00000319169 |
| ENSP00000209875 | ENSP00000327077 |
| ENSP00000209875 | ENSP00000329357 |
| ENSP00000209875 | ENSP00000330074 |
| ENSP00000209875 | ENSP00000336817 |
| ENSP00000209875 | ENSP00000342905 |
| ENSP00000209875 | ENSP00000343023 |
| ENSP00000209875 | ENSP00000343745 |
| ENSP00000209875 | ENSP00000346067 |
| ENSP00000209875 | ENSP00000347168 |
| ENSP00000209875 | ENSP00000349049 |
| ENSP00000209875 | ENSP00000349723 |
| ENSP00000209875 | ENSP00000350767 |
| ENSP00000209875 | ENSP00000352257 |
| ENSP00000209875 | ENSP00000352516 |
| ENSP00000209875 | ENSP00000354730 |
| ENSP00000209875 | ENSP00000354995 |

|                 |                 |
|-----------------|-----------------|
| ENSP00000209875 | ENSP00000355944 |
| ENSP00000209875 | ENSP00000356263 |
| ENSP00000209875 | ENSP00000357260 |
| ENSP00000209875 | ENSP00000357643 |
| ENSP00000209875 | ENSP00000357965 |
| ENSP00000209875 | ENSP00000358778 |
| ENSP00000209875 | ENSP00000359345 |
| ENSP00000209875 | ENSP00000360621 |
| ENSP00000209875 | ENSP00000360660 |
| ENSP00000209875 | ENSP00000362306 |
| ENSP00000209875 | ENSP00000362441 |
| ENSP00000209875 | ENSP00000362592 |
| ENSP00000209875 | ENSP00000362650 |
| ENSP00000209875 | ENSP00000364839 |
| ENSP00000209875 | ENSP00000365877 |
| ENSP00000209875 | ENSP00000367034 |
| ENSP00000209875 | ENSP00000368349 |
| ENSP00000209875 | ENSP00000370557 |
| ENSP00000209875 | ENSP00000376127 |
| ENSP00000209875 | ENSP00000377655 |
| ENSP00000209875 | ENSP00000378295 |
| ENSP00000209875 | ENSP00000379607 |
| ENSP00000209875 | ENSP00000381565 |
| ENSP00000209875 | ENSP00000386227 |
| ENSP00000209875 | ENSP00000395535 |
| ENSP00000209875 | ENSP00000417980 |
| ENSP00000210060 | ENSP00000249923 |
| ENSP00000210060 | ENSP00000255194 |
| ENSP00000210060 | ENSP00000256658 |
| ENSP00000210060 | ENSP00000301740 |
| ENSP00000210060 | ENSP00000336702 |
| ENSP00000210060 | ENSP00000344055 |
| ENSP00000210060 | ENSP00000346022 |
| ENSP00000210060 | ENSP00000347836 |
| ENSP00000210060 | ENSP00000350199 |
| ENSP00000210060 | ENSP00000357907 |
| ENSP00000210060 | ENSP00000366156 |
| ENSP00000210060 | ENSP00000386394 |
| ENSP00000210313 | ENSP00000215071 |
| ENSP00000210313 | ENSP00000219313 |
| ENSP00000210313 | ENSP00000253003 |
| ENSP00000210313 | ENSP00000261208 |
| ENSP00000210313 | ENSP00000264639 |
| ENSP00000210313 | ENSP00000265849 |
| ENSP00000210313 | ENSP00000295901 |
| ENSP00000210313 | ENSP00000298852 |

|                 |                 |
|-----------------|-----------------|
| ENSP00000210313 | ENSP00000299259 |
| ENSP00000210313 | ENSP00000305682 |
| ENSP00000210313 | ENSP00000309474 |
| ENSP00000210313 | ENSP00000310129 |
| ENSP00000210313 | ENSP00000348442 |
| ENSP00000210313 | ENSP00000396937 |
| ENSP00000210444 | ENSP00000352928 |
| ENSP00000210444 | ENSP00000399511 |
| ENSP00000211372 | ENSP00000222247 |
| ENSP00000211372 | ENSP00000226796 |
| ENSP00000211372 | ENSP00000230050 |
| ENSP00000211372 | ENSP00000232905 |
| ENSP00000211372 | ENSP00000241600 |
| ENSP00000211372 | ENSP00000245539 |
| ENSP00000211372 | ENSP00000252543 |
| ENSP00000211372 | ENSP00000253233 |
| ENSP00000211372 | ENSP00000258455 |
| ENSP00000211372 | ENSP00000262584 |
| ENSP00000211372 | ENSP00000265100 |
| ENSP00000211372 | ENSP00000268206 |
| ENSP00000211372 | ENSP00000270625 |
| ENSP00000211372 | ENSP00000272418 |
| ENSP00000211372 | ENSP00000274606 |
| ENSP00000211372 | ENSP00000278572 |
| ENSP00000211372 | ENSP00000280557 |
| ENSP00000211372 | ENSP00000282050 |
| ENSP00000211372 | ENSP00000295930 |
| ENSP00000211372 | ENSP00000296674 |
| ENSP00000211372 | ENSP00000296802 |
| ENSP00000211372 | ENSP00000296805 |
| ENSP00000211372 | ENSP00000297908 |
| ENSP00000211372 | ENSP00000298283 |
| ENSP00000211372 | ENSP00000300151 |
| ENSP00000211372 | ENSP00000301585 |
| ENSP00000211372 | ENSP00000302896 |
| ENSP00000211372 | ENSP00000306548 |
| ENSP00000211372 | ENSP00000307889 |
| ENSP00000211372 | ENSP00000309334 |
| ENSP00000211372 | ENSP00000311028 |
| ENSP00000211372 | ENSP00000317376 |
| ENSP00000211372 | ENSP00000318646 |
| ENSP00000211372 | ENSP00000323856 |
| ENSP00000211372 | ENSP00000326981 |
| ENSP00000211372 | ENSP00000331019 |
| ENSP00000211372 | ENSP00000336702 |
| ENSP00000211372 | ENSP00000337127 |

|                 |                 |
|-----------------|-----------------|
| ENSP00000211372 | ENSP00000339095 |
| ENSP00000211372 | ENSP00000341885 |
| ENSP00000211372 | ENSP00000346022 |
| ENSP00000211372 | ENSP00000346050 |
| ENSP00000211372 | ENSP00000346067 |
| ENSP00000211372 | ENSP00000346725 |
| ENSP00000211372 | ENSP00000354525 |
| ENSP00000211372 | ENSP00000355471 |
| ENSP00000211372 | ENSP00000356134 |
| ENSP00000211372 | ENSP00000361076 |
| ENSP00000211372 | ENSP00000362036 |
| ENSP00000211372 | ENSP00000362744 |
| ENSP00000211372 | ENSP00000363308 |
| ENSP00000211372 | ENSP00000363676 |
| ENSP00000211372 | ENSP00000364320 |
| ENSP00000211372 | ENSP00000368790 |
| ENSP00000211372 | ENSP00000369757 |
| ENSP00000211372 | ENSP00000373404 |
| ENSP00000211372 | ENSP00000375730 |
| ENSP00000211372 | ENSP00000378160 |
| ENSP00000211372 | ENSP00000379339 |
| ENSP00000211372 | ENSP00000379888 |
| ENSP00000211372 | ENSP00000389103 |
| ENSP00000211372 | ENSP00000393393 |
| ENSP00000211372 | ENSP00000414321 |
| ENSP00000211372 | ENSP00000420714 |
| ENSP00000211402 | ENSP00000225916 |
| ENSP00000211402 | ENSP00000264193 |
| ENSP00000211402 | ENSP00000284719 |
| ENSP00000211402 | ENSP00000294053 |
| ENSP00000211402 | ENSP00000307567 |
| ENSP00000211402 | ENSP00000313350 |
| ENSP00000211402 | ENSP00000344537 |
| ENSP00000211402 | ENSP00000353741 |
| ENSP00000211402 | ENSP00000355890 |
| ENSP00000211402 | ENSP00000362576 |
| ENSP00000211402 | ENSP00000364794 |
| ENSP00000211998 | ENSP00000228307 |
| ENSP00000211998 | ENSP00000254336 |
| ENSP00000211998 | ENSP00000261017 |
| ENSP00000211998 | ENSP00000262304 |
| ENSP00000211998 | ENSP00000269122 |
| ENSP00000211998 | ENSP00000284776 |
| ENSP00000211998 | ENSP00000286627 |
| ENSP00000211998 | ENSP00000312435 |
| ENSP00000211998 | ENSP00000329466 |

|                 |                 |
|-----------------|-----------------|
| ENSP00000211998 | ENSP00000341189 |
| ENSP00000211998 | ENSP00000344456 |
| ENSP00000211998 | ENSP00000348128 |
| ENSP00000211998 | ENSP00000355136 |
| ENSP00000211998 | ENSP00000357907 |
| ENSP00000211998 | ENSP00000379607 |
| ENSP00000212015 | ENSP00000215587 |
| ENSP00000212015 | ENSP00000215793 |
| ENSP00000212015 | ENSP00000216277 |
| ENSP00000212015 | ENSP00000216294 |
| ENSP00000212015 | ENSP00000217244 |
| ENSP00000212015 | ENSP00000217901 |
| ENSP00000212015 | ENSP00000217964 |
| ENSP00000212015 | ENSP00000219476 |
| ENSP00000212015 | ENSP00000222122 |
| ENSP00000212015 | ENSP00000222553 |
| ENSP00000212015 | ENSP00000223129 |
| ENSP00000212015 | ENSP00000225916 |
| ENSP00000212015 | ENSP00000226574 |
| ENSP00000212015 | ENSP00000228280 |
| ENSP00000212015 | ENSP00000229201 |
| ENSP00000212015 | ENSP00000229595 |
| ENSP00000212015 | ENSP00000230124 |
| ENSP00000212015 | ENSP00000230859 |
| ENSP00000212015 | ENSP00000232424 |
| ENSP00000212015 | ENSP00000234296 |
| ENSP00000212015 | ENSP00000234626 |
| ENSP00000212015 | ENSP00000235521 |
| ENSP00000212015 | ENSP00000242728 |
| ENSP00000212015 | ENSP00000245206 |
| ENSP00000212015 | ENSP00000247843 |
| ENSP00000212015 | ENSP00000248673 |
| ENSP00000212015 | ENSP00000250003 |
| ENSP00000212015 | ENSP00000251038 |
| ENSP00000212015 | ENSP00000251363 |
| ENSP00000212015 | ENSP00000254101 |
| ENSP00000212015 | ENSP00000254605 |
| ENSP00000212015 | ENSP00000254719 |
| ENSP00000212015 | ENSP00000256442 |
| ENSP00000212015 | ENSP00000257829 |
| ENSP00000212015 | ENSP00000260526 |
| ENSP00000212015 | ENSP00000261531 |
| ENSP00000212015 | ENSP00000261881 |
| ENSP00000212015 | ENSP00000261944 |
| ENSP00000212015 | ENSP00000262519 |
| ENSP00000212015 | ENSP00000262803 |

|                 |                 |
|-----------------|-----------------|
| ENSP00000212015 | ENSP00000262982 |
| ENSP00000212015 | ENSP00000263201 |
| ENSP00000212015 | ENSP00000263208 |
| ENSP00000212015 | ENSP00000263377 |
| ENSP00000212015 | ENSP00000263857 |
| ENSP00000212015 | ENSP00000263881 |
| ENSP00000212015 | ENSP00000264093 |
| ENSP00000212015 | ENSP00000264108 |
| ENSP00000212015 | ENSP00000264183 |
| ENSP00000212015 | ENSP00000264335 |
| ENSP00000212015 | ENSP00000264705 |
| ENSP00000212015 | ENSP00000264951 |
| ENSP00000212015 | ENSP00000265056 |
| ENSP00000212015 | ENSP00000265433 |
| ENSP00000212015 | ENSP00000267163 |
| ENSP00000212015 | ENSP00000267197 |
| ENSP00000212015 | ENSP00000268043 |
| ENSP00000212015 | ENSP00000268058 |
| ENSP00000212015 | ENSP00000269143 |
| ENSP00000212015 | ENSP00000274031 |
| ENSP00000212015 | ENSP00000274242 |
| ENSP00000212015 | ENSP00000280190 |
| ENSP00000212015 | ENSP00000281043 |
| ENSP00000212015 | ENSP00000281708 |
| ENSP00000212015 | ENSP00000282388 |
| ENSP00000212015 | ENSP00000282541 |
| ENSP00000212015 | ENSP00000282884 |
| ENSP00000212015 | ENSP00000283195 |
| ENSP00000212015 | ENSP00000287820 |
| ENSP00000212015 | ENSP00000287957 |
| ENSP00000212015 | ENSP00000288976 |
| ENSP00000212015 | ENSP00000290158 |
| ENSP00000212015 | ENSP00000292432 |
| ENSP00000212015 | ENSP00000294053 |
| ENSP00000212015 | ENSP00000296328 |
| ENSP00000212015 | ENSP00000296504 |
| ENSP00000212015 | ENSP00000296674 |
| ENSP00000212015 | ENSP00000296755 |
| ENSP00000212015 | ENSP00000296930 |
| ENSP00000212015 | ENSP00000297185 |
| ENSP00000212015 | ENSP00000297338 |
| ENSP00000212015 | ENSP00000297431 |
| ENSP00000212015 | ENSP00000297792 |
| ENSP00000212015 | ENSP00000298139 |
| ENSP00000212015 | ENSP00000298937 |
| ENSP00000212015 | ENSP00000299626 |

|                 |                 |
|-----------------|-----------------|
| ENSP00000212015 | ENSP00000300231 |
| ENSP00000212015 | ENSP00000300291 |
| ENSP00000212015 | ENSP00000301788 |
| ENSP00000212015 | ENSP00000301843 |
| ENSP00000212015 | ENSP00000302478 |
| ENSP00000212015 | ENSP00000304802 |
| ENSP00000212015 | ENSP00000306561 |
| ENSP00000212015 | ENSP00000307208 |
| ENSP00000212015 | ENSP00000307272 |
| ENSP00000212015 | ENSP00000307889 |
| ENSP00000212015 | ENSP00000308741 |
| ENSP00000212015 | ENSP00000309474 |
| ENSP00000212015 | ENSP00000309555 |
| ENSP00000212015 | ENSP00000309572 |
| ENSP00000212015 | ENSP00000310042 |
| ENSP00000212015 | ENSP00000310448 |
| ENSP00000212015 | ENSP00000310459 |
| ENSP00000212015 | ENSP00000311344 |
| ENSP00000212015 | ENSP00000311873 |
| ENSP00000212015 | ENSP00000312735 |
| ENSP00000212015 | ENSP00000312778 |
| ENSP00000212015 | ENSP00000314080 |
| ENSP00000212015 | ENSP00000314420 |
| ENSP00000212015 | ENSP00000314949 |
| ENSP00000212015 | ENSP00000315644 |
| ENSP00000212015 | ENSP00000315700 |
| ENSP00000212015 | ENSP00000316328 |
| ENSP00000212015 | ENSP00000316578 |
| ENSP00000212015 | ENSP00000317333 |
| ENSP00000212015 | ENSP00000318977 |
| ENSP00000212015 | ENSP00000319501 |
| ENSP00000212015 | ENSP00000320346 |
| ENSP00000212015 | ENSP00000320566 |
| ENSP00000212015 | ENSP00000321636 |
| ENSP00000212015 | ENSP00000321711 |
| ENSP00000212015 | ENSP00000322419 |
| ENSP00000212015 | ENSP00000322570 |
| ENSP00000212015 | ENSP00000322579 |
| ENSP00000212015 | ENSP00000324124 |
| ENSP00000212015 | ENSP00000325863 |
| ENSP00000212015 | ENSP00000325941 |
| ENSP00000212015 | ENSP00000327070 |
| ENSP00000212015 | ENSP00000328854 |
| ENSP00000212015 | ENSP00000330074 |
| ENSP00000212015 | ENSP00000332171 |
| ENSP00000212015 | ENSP00000333813 |

|                 |                 |
|-----------------|-----------------|
| ENSP00000212015 | ENSP00000333920 |
| ENSP00000212015 | ENSP00000333948 |
| ENSP00000212015 | ENSP00000334675 |
| ENSP00000212015 | ENSP00000334836 |
| ENSP00000212015 | ENSP00000335321 |
| ENSP00000212015 | ENSP00000335357 |
| ENSP00000212015 | ENSP00000337034 |
| ENSP00000212015 | ENSP00000337127 |
| ENSP00000212015 | ENSP00000339095 |
| ENSP00000212015 | ENSP00000339527 |
| ENSP00000212015 | ENSP00000340019 |
| ENSP00000212015 | ENSP00000340684 |
| ENSP00000212015 | ENSP00000340820 |
| ENSP00000212015 | ENSP00000341024 |
| ENSP00000212015 | ENSP00000341957 |
| ENSP00000212015 | ENSP00000342056 |
| ENSP00000212015 | ENSP00000343313 |
| ENSP00000212015 | ENSP00000343392 |
| ENSP00000212015 | ENSP00000343741 |
| ENSP00000212015 | ENSP00000344456 |
| ENSP00000212015 | ENSP00000345656 |
| ENSP00000212015 | ENSP00000346088 |
| ENSP00000212015 | ENSP00000346227 |
| ENSP00000212015 | ENSP00000346437 |
| ENSP00000212015 | ENSP00000346566 |
| ENSP00000212015 | ENSP00000346987 |
| ENSP00000212015 | ENSP00000347232 |
| ENSP00000212015 | ENSP00000347733 |
| ENSP00000212015 | ENSP00000347978 |
| ENSP00000212015 | ENSP00000348069 |
| ENSP00000212015 | ENSP00000348089 |
| ENSP00000212015 | ENSP00000348107 |
| ENSP00000212015 | ENSP00000348965 |
| ENSP00000212015 | ENSP00000349049 |
| ENSP00000212015 | ENSP00000349213 |
| ENSP00000212015 | ENSP00000349723 |
| ENSP00000212015 | ENSP00000349892 |
| ENSP00000212015 | ENSP00000350283 |
| ENSP00000212015 | ENSP00000351284 |
| ENSP00000212015 | ENSP00000352257 |
| ENSP00000212015 | ENSP00000352516 |
| ENSP00000212015 | ENSP00000353622 |
| ENSP00000212015 | ENSP00000354347 |
| ENSP00000212015 | ENSP00000354522 |
| ENSP00000212015 | ENSP00000354558 |
| ENSP00000212015 | ENSP00000354720 |



|                 |                 |
|-----------------|-----------------|
| ENSP00000212015 | ENSP00000354916 |
| ENSP00000212015 | ENSP00000355185 |
| ENSP00000212015 | ENSP00000355731 |
| ENSP00000212015 | ENSP00000356146 |
| ENSP00000212015 | ENSP00000356379 |
| ENSP00000212015 | ENSP00000356694 |
| ENSP00000212015 | ENSP00000357348 |
| ENSP00000212015 | ENSP00000357748 |
| ENSP00000212015 | ENSP00000357881 |
| ENSP00000212015 | ENSP00000357907 |
| ENSP00000212015 | ENSP00000358576 |
| ENSP00000212015 | ENSP00000360025 |
| ENSP00000212015 | ENSP00000360532 |
| ENSP00000212015 | ENSP00000360621 |
| ENSP00000212015 | ENSP00000360798 |
| ENSP00000212015 | ENSP00000361287 |
| ENSP00000212015 | ENSP00000361433 |
| ENSP00000212015 | ENSP00000364260 |
| ENSP00000212015 | ENSP00000364270 |
| ENSP00000212015 | ENSP00000364524 |
| ENSP00000212015 | ENSP00000364929 |
| ENSP00000212015 | ENSP00000365016 |
| ENSP00000212015 | ENSP00000365439 |
| ENSP00000212015 | ENSP00000365588 |
| ENSP00000212015 | ENSP00000365877 |
| ENSP00000212015 | ENSP00000366974 |
| ENSP00000212015 | ENSP00000367797 |
| ENSP00000212015 | ENSP00000368349 |
| ENSP00000212015 | ENSP00000368438 |
| ENSP00000212015 | ENSP00000369042 |
| ENSP00000212015 | ENSP00000369335 |
| ENSP00000212015 | ENSP00000369497 |
| ENSP00000212015 | ENSP00000369695 |
| ENSP00000212015 | ENSP00000369716 |
| ENSP00000212015 | ENSP00000371475 |
| ENSP00000212015 | ENSP00000372023 |
| ENSP00000212015 | ENSP00000373060 |
| ENSP00000212015 | ENSP00000374213 |
| ENSP00000212015 | ENSP00000377655 |
| ENSP00000212015 | ENSP00000377865 |
| ENSP00000212015 | ENSP00000378812 |
| ENSP00000212015 | ENSP00000380504 |
| ENSP00000212015 | ENSP00000381198 |
| ENSP00000212015 | ENSP00000381657 |
| ENSP00000212015 | ENSP00000381932 |
| ENSP00000212015 | ENSP00000386456 |

|                 |                 |
|-----------------|-----------------|
| ENSP00000212015 | ENSP00000386759 |
| ENSP00000212015 | ENSP00000387429 |
| ENSP00000212015 | ENSP00000391723 |
| ENSP00000212015 | ENSP00000394791 |
| ENSP00000212015 | ENSP00000395535 |
| ENSP00000212015 | ENSP00000398930 |
| ENSP00000212015 | ENSP00000399968 |
| ENSP00000212015 | ENSP00000401508 |
| ENSP00000212015 | ENSP00000402527 |
| ENSP00000212015 | ENSP00000404318 |
| ENSP00000212015 | ENSP00000409167 |
| ENSP00000212015 | ENSP00000418111 |
| ENSP00000212355 | ENSP00000242208 |
| ENSP00000212355 | ENSP00000243786 |
| ENSP00000212355 | ENSP00000307046 |
| ENSP00000212355 | ENSP00000340698 |
| ENSP00000212355 | ENSP00000341803 |
| ENSP00000212355 | ENSP00000355896 |
| ENSP00000212355 | ENSP00000362299 |
| ENSP00000215071 | ENSP00000216455 |
| ENSP00000215071 | ENSP00000219313 |
| ENSP00000215071 | ENSP00000220849 |
| ENSP00000215071 | ENSP00000241071 |
| ENSP00000215071 | ENSP00000245960 |
| ENSP00000215071 | ENSP00000248566 |
| ENSP00000215071 | ENSP00000253003 |
| ENSP00000215071 | ENSP00000259457 |
| ENSP00000215071 | ENSP00000261211 |
| ENSP00000215071 | ENSP00000261601 |
| ENSP00000215071 | ENSP00000261712 |
| ENSP00000215071 | ENSP00000261758 |
| ENSP00000215071 | ENSP00000261881 |
| ENSP00000215071 | ENSP00000262193 |
| ENSP00000215071 | ENSP00000264639 |
| ENSP00000215071 | ENSP00000265990 |
| ENSP00000215071 | ENSP00000268802 |
| ENSP00000215071 | ENSP00000269143 |
| ENSP00000215071 | ENSP00000281708 |
| ENSP00000215071 | ENSP00000290541 |
| ENSP00000215071 | ENSP00000295901 |
| ENSP00000215071 | ENSP00000298852 |
| ENSP00000215071 | ENSP00000299206 |
| ENSP00000215071 | ENSP00000299259 |
| ENSP00000215071 | ENSP00000300738 |
| ENSP00000215071 | ENSP00000303279 |
| ENSP00000215071 | ENSP00000309474 |

|                 |                 |
|-----------------|-----------------|
| ENSP00000215071 | ENSP00000310129 |
| ENSP00000215071 | ENSP00000311665 |
| ENSP00000215071 | ENSP00000313350 |
| ENSP00000215071 | ENSP00000315674 |
| ENSP00000215071 | ENSP00000318944 |
| ENSP00000215071 | ENSP00000320508 |
| ENSP00000215071 | ENSP00000321711 |
| ENSP00000215071 | ENSP00000333122 |
| ENSP00000215071 | ENSP00000333950 |
| ENSP00000215071 | ENSP00000334188 |
| ENSP00000215071 | ENSP00000337501 |
| ENSP00000215071 | ENSP00000339109 |
| ENSP00000215071 | ENSP00000340836 |
| ENSP00000215071 | ENSP00000347997 |
| ENSP00000215071 | ENSP00000348442 |
| ENSP00000215071 | ENSP00000349785 |
| ENSP00000215071 | ENSP00000349970 |
| ENSP00000215071 | ENSP00000350708 |
| ENSP00000215071 | ENSP00000351947 |
| ENSP00000215071 | ENSP00000352219 |
| ENSP00000215071 | ENSP00000352257 |
| ENSP00000215071 | ENSP00000354032 |
| ENSP00000215071 | ENSP00000354558 |
| ENSP00000215071 | ENSP00000354883 |
| ENSP00000215071 | ENSP00000356655 |
| ENSP00000215071 | ENSP00000360216 |
| ENSP00000215071 | ENSP00000362110 |
| ENSP00000215071 | ENSP00000362334 |
| ENSP00000215071 | ENSP00000364794 |
| ENSP00000215071 | ENSP00000369531 |
| ENSP00000215071 | ENSP00000370408 |
| ENSP00000215071 | ENSP00000376945 |
| ENSP00000215071 | ENSP00000384211 |
| ENSP00000215071 | ENSP00000386212 |
| ENSP00000215071 | ENSP00000391723 |
| ENSP00000215071 | ENSP00000396937 |
| ENSP00000215071 | ENSP00000417748 |
| ENSP00000215115 | ENSP00000261531 |
| ENSP00000215115 | ENSP00000263121 |
| ENSP00000215115 | ENSP00000320485 |
| ENSP00000215115 | ENSP00000323967 |
| ENSP00000215115 | ENSP00000335044 |
| ENSP00000215115 | ENSP00000378180 |
| ENSP00000215375 | ENSP00000216194 |
| ENSP00000215375 | ENSP00000220751 |
| ENSP00000215375 | ENSP00000236067 |

|                 |                 |
|-----------------|-----------------|
| ENSP00000215375 | ENSP00000251038 |
| ENSP00000215375 | ENSP00000262030 |
| ENSP00000215375 | ENSP00000265537 |
| ENSP00000215375 | ENSP00000273258 |
| ENSP00000215375 | ENSP00000277865 |
| ENSP00000215375 | ENSP00000282050 |
| ENSP00000215375 | ENSP00000284727 |
| ENSP00000215375 | ENSP00000290299 |
| ENSP00000215375 | ENSP00000292475 |
| ENSP00000215375 | ENSP00000295901 |
| ENSP00000215375 | ENSP00000300688 |
| ENSP00000215375 | ENSP00000301587 |
| ENSP00000215375 | ENSP00000306003 |
| ENSP00000215375 | ENSP00000335203 |
| ENSP00000215375 | ENSP00000343313 |
| ENSP00000215375 | ENSP00000349142 |
| ENSP00000215375 | ENSP00000349325 |
| ENSP00000215375 | ENSP00000349877 |
| ENSP00000215375 | ENSP00000354632 |
| ENSP00000215375 | ENSP00000354676 |
| ENSP00000215375 | ENSP00000358737 |
| ENSP00000215375 | ENSP00000361686 |
| ENSP00000215375 | ENSP00000364188 |
| ENSP00000215375 | ENSP00000370414 |
| ENSP00000215375 | ENSP00000377954 |
| ENSP00000215375 | ENSP00000387262 |
| ENSP00000215375 | ENSP00000389649 |
| ENSP00000215479 | ENSP00000267426 |
| ENSP00000215479 | ENSP00000333697 |
| ENSP00000215479 | ENSP00000365131 |
| ENSP00000215479 | ENSP00000393887 |
| ENSP00000215565 | ENSP00000252102 |
| ENSP00000215565 | ENSP00000308351 |
| ENSP00000215565 | ENSP00000348965 |
| ENSP00000215565 | ENSP00000367265 |
| ENSP00000215570 | ENSP00000223129 |
| ENSP00000215570 | ENSP00000253003 |
| ENSP00000215570 | ENSP00000257245 |
| ENSP00000215570 | ENSP00000258418 |
| ENSP00000215570 | ENSP00000295767 |
| ENSP00000215570 | ENSP00000307023 |
| ENSP00000215570 | ENSP00000315702 |
| ENSP00000215570 | ENSP00000320236 |
| ENSP00000215570 | ENSP00000321239 |
| ENSP00000215570 | ENSP00000335493 |
| ENSP00000215570 | ENSP00000338293 |

|                 |                 |
|-----------------|-----------------|
| ENSP00000215570 | ENSP00000353622 |
| ENSP00000215570 | ENSP00000356405 |
| ENSP00000215570 | ENSP00000357360 |
| ENSP00000215570 | ENSP00000360157 |
| ENSP00000215570 | ENSP00000361993 |
| ENSP00000215570 | ENSP00000365766 |
| ENSP00000215570 | ENSP00000368332 |
| ENSP00000215570 | ENSP00000389934 |
| ENSP00000215587 | ENSP00000215739 |
| ENSP00000215587 | ENSP00000216297 |
| ENSP00000215587 | ENSP00000219252 |
| ENSP00000215587 | ENSP00000221859 |
| ENSP00000215587 | ENSP00000222567 |
| ENSP00000215587 | ENSP00000225504 |
| ENSP00000215587 | ENSP00000237380 |
| ENSP00000215587 | ENSP00000237455 |
| ENSP00000215587 | ENSP00000238789 |
| ENSP00000215587 | ENSP00000242719 |
| ENSP00000215587 | ENSP00000247843 |
| ENSP00000215587 | ENSP00000247970 |
| ENSP00000215587 | ENSP00000251038 |
| ENSP00000215587 | ENSP00000253107 |
| ENSP00000215587 | ENSP00000254719 |
| ENSP00000215587 | ENSP00000255764 |
| ENSP00000215587 | ENSP00000256257 |
| ENSP00000215587 | ENSP00000259605 |
| ENSP00000215587 | ENSP00000260956 |
| ENSP00000215587 | ENSP00000261531 |
| ENSP00000215587 | ENSP00000262608 |
| ENSP00000215587 | ENSP00000263390 |
| ENSP00000215587 | ENSP00000263795 |
| ENSP00000215587 | ENSP00000263857 |
| ENSP00000215587 | ENSP00000263997 |
| ENSP00000215587 | ENSP00000264718 |
| ENSP00000215587 | ENSP00000268058 |
| ENSP00000215587 | ENSP00000268711 |
| ENSP00000215587 | ENSP00000270225 |
| ENSP00000215587 | ENSP00000272645 |
| ENSP00000215587 | ENSP00000282326 |
| ENSP00000215587 | ENSP00000283875 |
| ENSP00000215587 | ENSP00000286317 |
| ENSP00000215587 | ENSP00000286835 |
| ENSP00000215587 | ENSP00000288199 |
| ENSP00000215587 | ENSP00000288976 |
| ENSP00000215587 | ENSP00000292363 |
| ENSP00000215587 | ENSP00000293860 |

|                 |                 |
|-----------------|-----------------|
| ENSP00000215587 | ENSP00000295131 |
| ENSP00000215587 | ENSP00000295321 |
| ENSP00000215587 | ENSP00000299424 |
| ENSP00000215587 | ENSP00000299543 |
| ENSP00000215587 | ENSP00000299601 |
| ENSP00000215587 | ENSP00000299767 |
| ENSP00000215587 | ENSP00000299853 |
| ENSP00000215587 | ENSP00000300651 |
| ENSP00000215587 | ENSP00000301788 |
| ENSP00000215587 | ENSP00000302478 |
| ENSP00000215587 | ENSP00000303088 |
| ENSP00000215587 | ENSP00000303515 |
| ENSP00000215587 | ENSP00000304321 |
| ENSP00000215587 | ENSP00000306245 |
| ENSP00000215587 | ENSP00000306906 |
| ENSP00000215587 | ENSP00000306983 |
| ENSP00000215587 | ENSP00000307208 |
| ENSP00000215587 | ENSP00000310260 |
| ENSP00000215587 | ENSP00000311977 |
| ENSP00000215587 | ENSP00000312735 |
| ENSP00000215587 | ENSP00000314311 |
| ENSP00000215587 | ENSP00000314949 |
| ENSP00000215587 | ENSP00000315950 |
| ENSP00000215587 | ENSP00000317636 |
| ENSP00000215587 | ENSP00000318115 |
| ENSP00000215587 | ENSP00000318641 |
| ENSP00000215587 | ENSP00000323720 |
| ENSP00000215587 | ENSP00000324124 |
| ENSP00000215587 | ENSP00000326767 |
| ENSP00000215587 | ENSP00000327889 |
| ENSP00000215587 | ENSP00000331111 |
| ENSP00000215587 | ENSP00000332340 |
| ENSP00000215587 | ENSP00000334564 |
| ENSP00000215587 | ENSP00000335357 |
| ENSP00000215587 | ENSP00000337340 |
| ENSP00000215587 | ENSP00000340823 |
| ENSP00000215587 | ENSP00000342121 |
| ENSP00000215587 | ENSP00000342889 |
| ENSP00000215587 | ENSP00000343129 |
| ENSP00000215587 | ENSP00000345530 |
| ENSP00000215587 | ENSP00000347345 |
| ENSP00000215587 | ENSP00000348168 |
| ENSP00000215587 | ENSP00000349213 |
| ENSP00000215587 | ENSP00000350967 |
| ENSP00000215587 | ENSP00000354775 |
| ENSP00000215587 | ENSP00000354916 |

|                 |                 |
|-----------------|-----------------|
| ENSP00000215587 | ENSP00000356146 |
| ENSP00000215587 | ENSP00000359531 |
| ENSP00000215587 | ENSP00000360473 |
| ENSP00000215587 | ENSP00000361465 |
| ENSP00000215587 | ENSP00000362546 |
| ENSP00000215587 | ENSP00000362900 |
| ENSP00000215587 | ENSP00000363193 |
| ENSP00000215587 | ENSP00000363734 |
| ENSP00000215587 | ENSP00000363779 |
| ENSP00000215587 | ENSP00000366828 |
| ENSP00000215587 | ENSP00000367029 |
| ENSP00000215587 | ENSP00000369695 |
| ENSP00000215587 | ENSP00000371546 |
| ENSP00000215587 | ENSP00000371800 |
| ENSP00000215587 | ENSP00000372694 |
| ENSP00000215587 | ENSP00000376097 |
| ENSP00000215587 | ENSP00000377969 |
| ENSP00000215587 | ENSP00000378736 |
| ENSP00000215587 | ENSP00000379607 |
| ENSP00000215587 | ENSP00000381064 |
| ENSP00000215587 | ENSP00000383503 |
| ENSP00000215587 | ENSP00000386759 |
| ENSP00000215587 | ENSP00000397636 |
| ENSP00000215587 | ENSP00000402515 |
| ENSP00000215587 | ENSP00000403852 |
| ENSP00000215587 | ENSP00000405636 |
| ENSP00000215587 | ENSP00000406293 |
| ENSP00000215587 | ENSP00000410530 |
| ENSP00000215587 | ENSP00000410954 |
| ENSP00000215587 | ENSP00000412319 |
| ENSP00000215587 | ENSP00000414110 |
| ENSP00000215587 | ENSP00000415678 |
| ENSP00000215587 | ENSP00000416599 |
| ENSP00000215730 | ENSP00000222547 |
| ENSP00000215730 | ENSP00000223369 |
| ENSP00000215730 | ENSP00000225567 |
| ENSP00000215730 | ENSP00000225724 |
| ENSP00000215730 | ENSP00000230449 |
| ENSP00000215730 | ENSP00000231668 |
| ENSP00000215730 | ENSP00000236192 |
| ENSP00000215730 | ENSP00000249647 |
| ENSP00000215730 | ENSP00000253861 |
| ENSP00000215730 | ENSP00000256897 |
| ENSP00000215730 | ENSP00000258301 |
| ENSP00000215730 | ENSP00000259400 |
| ENSP00000215730 | ENSP00000260818 |

|                 |                 |
|-----------------|-----------------|
| ENSP00000215730 | ENSP00000263277 |
| ENSP00000215730 | ENSP00000263897 |
| ENSP00000215730 | ENSP00000264157 |
| ENSP00000215730 | ENSP00000272427 |
| ENSP00000215730 | ENSP00000286448 |
| ENSP00000215730 | ENSP00000294179 |
| ENSP00000215730 | ENSP00000295926 |
| ENSP00000215730 | ENSP00000305255 |
| ENSP00000215730 | ENSP00000305810 |
| ENSP00000215730 | ENSP00000310521 |
| ENSP00000215730 | ENSP00000312027 |
| ENSP00000215730 | ENSP00000317714 |
| ENSP00000215730 | ENSP00000323377 |
| ENSP00000215730 | ENSP00000324628 |
| ENSP00000215730 | ENSP00000327650 |
| ENSP00000215730 | ENSP00000332326 |
| ENSP00000215730 | ENSP00000334100 |
| ENSP00000215730 | ENSP00000336790 |
| ENSP00000215730 | ENSP00000337501 |
| ENSP00000215730 | ENSP00000339191 |
| ENSP00000215730 | ENSP00000342793 |
| ENSP00000215730 | ENSP00000351926 |
| ENSP00000215730 | ENSP00000353564 |
| ENSP00000215730 | ENSP00000360183 |
| ENSP00000215730 | ENSP00000361048 |
| ENSP00000215730 | ENSP00000362399 |
| ENSP00000215730 | ENSP00000363055 |
| ENSP00000215730 | ENSP00000366225 |
| ENSP00000215730 | ENSP00000368976 |
| ENSP00000215730 | ENSP00000369409 |
| ENSP00000215730 | ENSP00000370557 |
| ENSP00000215730 | ENSP00000374529 |
| ENSP00000215730 | ENSP00000381293 |
| ENSP00000215730 | ENSP00000389934 |
| ENSP00000215730 | ENSP00000390783 |
| ENSP00000215730 | ENSP00000417748 |
| ENSP00000215739 | ENSP00000234170 |
| ENSP00000215739 | ENSP00000245960 |
| ENSP00000215739 | ENSP00000256398 |
| ENSP00000215739 | ENSP00000256442 |
| ENSP00000215739 | ENSP00000260383 |
| ENSP00000215739 | ENSP00000260731 |
| ENSP00000215739 | ENSP00000261597 |
| ENSP00000215739 | ENSP00000262300 |
| ENSP00000215739 | ENSP00000271452 |
| ENSP00000215739 | ENSP00000274680 |



|                 |                 |
|-----------------|-----------------|
| ENSP00000215739 | ENSP00000286317 |
| ENSP00000215739 | ENSP00000296509 |
| ENSP00000215739 | ENSP00000300231 |
| ENSP00000215739 | ENSP00000301280 |
| ENSP00000215739 | ENSP00000301332 |
| ENSP00000215739 | ENSP00000311344 |
| ENSP00000215739 | ENSP00000312735 |
| ENSP00000215739 | ENSP00000320309 |
| ENSP00000215739 | ENSP00000322957 |
| ENSP00000215739 | ENSP00000323074 |
| ENSP00000215739 | ENSP00000325612 |
| ENSP00000215739 | ENSP00000337926 |
| ENSP00000215739 | ENSP00000338629 |
| ENSP00000215739 | ENSP00000339299 |
| ENSP00000215739 | ENSP00000343023 |
| ENSP00000215739 | ENSP00000346762 |
| ENSP00000215739 | ENSP00000348215 |
| ENSP00000215739 | ENSP00000348577 |
| ENSP00000215739 | ENSP00000353796 |
| ENSP00000215739 | ENSP00000354158 |
| ENSP00000215739 | ENSP00000354526 |
| ENSP00000215739 | ENSP00000354633 |
| ENSP00000215739 | ENSP00000355672 |
| ENSP00000215739 | ENSP00000355759 |
| ENSP00000215739 | ENSP00000355922 |
| ENSP00000215739 | ENSP00000357643 |
| ENSP00000215739 | ENSP00000357682 |
| ENSP00000215739 | ENSP00000359740 |
| ENSP00000215739 | ENSP00000359837 |
| ENSP00000215739 | ENSP00000366271 |
| ENSP00000215739 | ENSP00000377265 |
| ENSP00000215739 | ENSP00000380129 |
| ENSP00000215739 | ENSP00000384675 |
| ENSP00000215739 | ENSP00000417980 |
| ENSP00000215742 | ENSP00000263663 |
| ENSP00000215742 | ENSP00000304689 |
| ENSP00000215742 | ENSP00000309555 |
| ENSP00000215742 | ENSP00000361048 |
| ENSP00000215780 | ENSP00000219409 |
| ENSP00000215780 | ENSP00000284719 |
| ENSP00000215780 | ENSP00000294053 |
| ENSP00000215780 | ENSP00000307567 |
| ENSP00000215780 | ENSP00000353741 |
| ENSP00000215780 | ENSP00000355890 |
| ENSP00000215781 | ENSP00000258743 |
| ENSP00000215781 | ENSP00000263409 |

|                 |                 |
|-----------------|-----------------|
| ENSP00000215781 | ENSP00000338799 |
| ENSP00000215793 | ENSP00000215829 |
| ENSP00000215793 | ENSP00000215957 |
| ENSP00000215793 | ENSP00000221494 |
| ENSP00000215793 | ENSP00000221566 |
| ENSP00000215793 | ENSP00000225983 |
| ENSP00000215793 | ENSP00000227524 |
| ENSP00000215793 | ENSP00000228284 |
| ENSP00000215793 | ENSP00000235090 |
| ENSP00000215793 | ENSP00000252699 |
| ENSP00000215793 | ENSP00000254193 |
| ENSP00000215793 | ENSP00000257548 |
| ENSP00000215793 | ENSP00000261531 |
| ENSP00000215793 | ENSP00000262056 |
| ENSP00000215793 | ENSP00000264233 |
| ENSP00000215793 | ENSP00000266079 |
| ENSP00000215793 | ENSP00000266735 |
| ENSP00000215793 | ENSP00000267812 |
| ENSP00000215793 | ENSP00000268206 |
| ENSP00000215793 | ENSP00000268482 |
| ENSP00000215793 | ENSP00000268483 |
| ENSP00000215793 | ENSP00000271628 |
| ENSP00000215793 | ENSP00000274712 |
| ENSP00000215793 | ENSP00000295488 |
| ENSP00000215793 | ENSP00000296702 |
| ENSP00000215793 | ENSP00000296805 |
| ENSP00000215793 | ENSP00000300413 |
| ENSP00000215793 | ENSP00000301740 |
| ENSP00000215793 | ENSP00000301764 |
| ENSP00000215793 | ENSP00000302160 |
| ENSP00000215793 | ENSP00000303191 |
| ENSP00000215793 | ENSP00000304350 |
| ENSP00000215793 | ENSP00000304370 |
| ENSP00000215793 | ENSP00000305790 |
| ENSP00000215793 | ENSP00000310448 |
| ENSP00000215793 | ENSP00000312411 |
| ENSP00000215793 | ENSP00000312671 |
| ENSP00000215793 | ENSP00000315035 |
| ENSP00000215793 | ENSP00000315379 |
| ENSP00000215793 | ENSP00000317790 |
| ENSP00000215793 | ENSP00000318861 |
| ENSP00000215793 | ENSP00000319341 |
| ENSP00000215793 | ENSP00000322608 |
| ENSP00000215793 | ENSP00000323302 |
| ENSP00000215793 | ENSP00000324122 |
| ENSP00000215793 | ENSP00000326806 |

|                 |                 |
|-----------------|-----------------|
| ENSP00000215793 | ENSP00000329357 |
| ENSP00000215793 | ENSP00000329466 |
| ENSP00000215793 | ENSP00000332103 |
| ENSP00000215793 | ENSP00000334148 |
| ENSP00000215793 | ENSP00000335321 |
| ENSP00000215793 | ENSP00000337405 |
| ENSP00000215793 | ENSP00000342374 |
| ENSP00000215793 | ENSP00000349785 |
| ENSP00000215793 | ENSP00000352308 |
| ENSP00000215793 | ENSP00000356520 |
| ENSP00000215793 | ENSP00000357631 |
| ENSP00000215793 | ENSP00000359454 |
| ENSP00000215793 | ENSP00000360286 |
| ENSP00000215793 | ENSP00000360532 |
| ENSP00000215793 | ENSP00000361577 |
| ENSP00000215793 | ENSP00000361824 |
| ENSP00000215793 | ENSP00000362110 |
| ENSP00000215793 | ENSP00000363313 |
| ENSP00000215793 | ENSP00000364813 |
| ENSP00000215793 | ENSP00000366557 |
| ENSP00000215793 | ENSP00000366607 |
| ENSP00000215793 | ENSP00000366829 |
| ENSP00000215793 | ENSP00000368801 |
| ENSP00000215793 | ENSP00000370589 |
| ENSP00000215793 | ENSP00000378350 |
| ENSP00000215793 | ENSP00000379394 |
| ENSP00000215793 | ENSP00000379607 |
| ENSP00000215793 | ENSP00000386161 |
| ENSP00000215793 | ENSP00000400591 |
| ENSP00000215793 | ENSP00000410758 |
| ENSP00000215793 | ENSP00000412566 |
| ENSP00000215793 | ENSP00000414006 |
| ENSP00000215793 | ENSP00000414634 |
| ENSP00000215829 | ENSP00000221448 |
| ENSP00000215829 | ENSP00000221494 |
| ENSP00000215829 | ENSP00000227524 |
| ENSP00000215829 | ENSP00000235090 |
| ENSP00000215829 | ENSP00000240304 |
| ENSP00000215829 | ENSP00000243563 |
| ENSP00000215829 | ENSP00000244520 |
| ENSP00000215829 | ENSP00000251038 |
| ENSP00000215829 | ENSP00000252622 |
| ENSP00000215829 | ENSP00000254193 |
| ENSP00000215829 | ENSP00000261531 |
| ENSP00000215829 | ENSP00000261973 |
| ENSP00000215829 | ENSP00000262962 |

|                 |                 |
|-----------------|-----------------|
| ENSP00000215829 | ENSP00000266079 |
| ENSP00000215829 | ENSP00000266735 |
| ENSP00000215829 | ENSP00000267812 |
| ENSP00000215829 | ENSP00000268483 |
| ENSP00000215829 | ENSP00000270257 |
| ENSP00000215829 | ENSP00000272645 |
| ENSP00000215829 | ENSP00000274712 |
| ENSP00000215829 | ENSP00000281950 |
| ENSP00000215829 | ENSP00000285873 |
| ENSP00000215829 | ENSP00000290158 |
| ENSP00000215829 | ENSP00000293404 |
| ENSP00000215829 | ENSP00000293406 |
| ENSP00000215829 | ENSP00000296702 |
| ENSP00000215829 | ENSP00000300146 |
| ENSP00000215829 | ENSP00000300413 |
| ENSP00000215829 | ENSP00000301740 |
| ENSP00000215829 | ENSP00000301764 |
| ENSP00000215829 | ENSP00000302160 |
| ENSP00000215829 | ENSP00000303191 |
| ENSP00000215829 | ENSP00000304350 |
| ENSP00000215829 | ENSP00000304370 |
| ENSP00000215829 | ENSP00000305790 |
| ENSP00000215829 | ENSP00000308533 |
| ENSP00000215829 | ENSP00000308546 |
| ENSP00000215829 | ENSP00000309830 |
| ENSP00000215829 | ENSP00000310448 |
| ENSP00000215829 | ENSP00000310596 |
| ENSP00000215829 | ENSP00000313674 |
| ENSP00000215829 | ENSP00000314425 |
| ENSP00000215829 | ENSP00000315035 |
| ENSP00000215829 | ENSP00000315379 |
| ENSP00000215829 | ENSP00000318861 |
| ENSP00000215829 | ENSP00000319169 |
| ENSP00000215829 | ENSP00000319341 |
| ENSP00000215829 | ENSP00000323302 |
| ENSP00000215829 | ENSP00000324122 |
| ENSP00000215829 | ENSP00000325448 |
| ENSP00000215829 | ENSP00000326261 |
| ENSP00000215829 | ENSP00000326806 |
| ENSP00000215829 | ENSP00000334148 |
| ENSP00000215829 | ENSP00000334538 |
| ENSP00000215829 | ENSP00000335321 |
| ENSP00000215829 | ENSP00000337405 |
| ENSP00000215829 | ENSP00000342374 |
| ENSP00000215829 | ENSP00000346986 |
| ENSP00000215829 | ENSP00000348010 |

|                 |                 |
|-----------------|-----------------|
| ENSP00000215829 | ENSP00000351137 |
| ENSP00000215829 | ENSP00000357631 |
| ENSP00000215829 | ENSP00000358716 |
| ENSP00000215829 | ENSP00000360532 |
| ENSP00000215829 | ENSP00000360876 |
| ENSP00000215829 | ENSP00000361577 |
| ENSP00000215829 | ENSP00000361699 |
| ENSP00000215829 | ENSP00000362110 |
| ENSP00000215829 | ENSP00000362936 |
| ENSP00000215829 | ENSP00000363313 |
| ENSP00000215829 | ENSP00000364289 |
| ENSP00000215829 | ENSP00000364813 |
| ENSP00000215829 | ENSP00000366557 |
| ENSP00000215829 | ENSP00000366607 |
| ENSP00000215829 | ENSP00000367030 |
| ENSP00000215829 | ENSP00000367439 |
| ENSP00000215829 | ENSP00000370083 |
| ENSP00000215829 | ENSP00000370119 |
| ENSP00000215829 | ENSP00000372883 |
| ENSP00000215829 | ENSP00000376758 |
| ENSP00000215829 | ENSP00000376973 |
| ENSP00000215829 | ENSP00000379607 |
| ENSP00000215829 | ENSP00000392270 |
| ENSP00000215829 | ENSP00000400591 |
| ENSP00000215829 | ENSP00000401371 |
| ENSP00000215829 | ENSP00000403345 |
| ENSP00000215829 | ENSP00000406280 |
| ENSP00000215829 | ENSP00000410758 |
| ENSP00000215829 | ENSP00000412566 |
| ENSP00000215829 | ENSP00000414006 |
| ENSP00000215829 | ENSP00000414634 |
| ENSP00000215917 | ENSP00000251038 |
| ENSP00000215957 | ENSP00000263246 |
| ENSP00000215957 | ENSP00000268668 |
| ENSP00000215957 | ENSP00000359345 |
| ENSP00000215957 | ENSP00000378326 |
| ENSP00000215957 | ENSP00000380921 |
| ENSP00000215957 | ENSP00000382064 |
| ENSP00000215957 | ENSP00000384792 |
| ENSP00000215957 | ENSP00000386520 |
| ENSP00000215980 | ENSP00000283006 |
| ENSP00000215980 | ENSP00000336868 |
| ENSP00000216027 | ENSP00000245157 |
| ENSP00000216027 | ENSP00000251038 |
| ENSP00000216027 | ENSP00000268057 |
| ENSP00000216027 | ENSP00000294053 |

|                 |                 |
|-----------------|-----------------|
| ENSP00000216027 | ENSP00000297185 |
| ENSP00000216027 | ENSP00000300107 |
| ENSP00000216027 | ENSP00000310623 |
| ENSP00000216027 | ENSP00000318115 |
| ENSP00000216027 | ENSP00000353701 |
| ENSP00000216027 | ENSP00000363205 |
| ENSP00000216034 | ENSP00000217244 |
| ENSP00000216034 | ENSP00000251038 |
| ENSP00000216034 | ENSP00000252487 |
| ENSP00000216034 | ENSP00000259750 |
| ENSP00000216034 | ENSP00000260257 |
| ENSP00000216034 | ENSP00000262030 |
| ENSP00000216034 | ENSP00000270538 |
| ENSP00000216034 | ENSP00000274680 |
| ENSP00000216034 | ENSP00000284320 |
| ENSP00000216034 | ENSP00000293288 |
| ENSP00000216034 | ENSP00000295030 |
| ENSP00000216034 | ENSP00000296255 |
| ENSP00000216034 | ENSP00000315693 |
| ENSP00000216034 | ENSP00000317331 |
| ENSP00000216034 | ENSP00000318115 |
| ENSP00000216034 | ENSP00000342381 |
| ENSP00000216034 | ENSP00000351214 |
| ENSP00000216034 | ENSP00000352219 |
| ENSP00000216034 | ENSP00000361686 |
| ENSP00000216034 | ENSP00000361993 |
| ENSP00000216034 | ENSP00000364188 |
| ENSP00000216034 | ENSP00000365766 |
| ENSP00000216034 | ENSP00000368523 |
| ENSP00000216034 | ENSP00000370607 |
| ENSP00000216034 | ENSP00000387262 |
| ENSP00000216036 | ENSP00000341551 |
| ENSP00000216037 | ENSP00000222307 |
| ENSP00000216037 | ENSP00000231487 |
| ENSP00000216037 | ENSP00000254908 |
| ENSP00000216037 | ENSP00000261884 |
| ENSP00000216037 | ENSP00000262133 |
| ENSP00000216037 | ENSP00000306245 |
| ENSP00000216037 | ENSP00000329662 |
| ENSP00000216037 | ENSP00000333298 |
| ENSP00000216037 | ENSP00000344504 |
| ENSP00000216039 | ENSP00000344668 |
| ENSP00000216039 | ENSP00000361993 |
| ENSP00000216044 | ENSP00000217964 |
| ENSP00000216044 | ENSP00000219473 |
| ENSP00000216044 | ENSP00000238647 |

|                 |                 |
|-----------------|-----------------|
| ENSP00000216044 | ENSP00000251871 |
| ENSP00000216044 | ENSP00000252137 |
| ENSP00000216044 | ENSP00000255764 |
| ENSP00000216044 | ENSP00000258648 |
| ENSP00000216044 | ENSP00000260363 |
| ENSP00000216044 | ENSP00000260753 |
| ENSP00000216044 | ENSP00000261758 |
| ENSP00000216044 | ENSP00000263121 |
| ENSP00000216044 | ENSP00000263205 |
| ENSP00000216044 | ENSP00000266126 |
| ENSP00000216044 | ENSP00000267064 |
| ENSP00000216044 | ENSP00000268668 |
| ENSP00000216044 | ENSP00000286317 |
| ENSP00000216044 | ENSP00000290663 |
| ENSP00000216044 | ENSP00000292035 |
| ENSP00000216044 | ENSP00000293777 |
| ENSP00000216044 | ENSP00000297347 |
| ENSP00000216044 | ENSP00000297689 |
| ENSP00000216044 | ENSP00000306100 |
| ENSP00000216044 | ENSP00000323720 |
| ENSP00000216044 | ENSP00000323858 |
| ENSP00000216044 | ENSP00000325612 |
| ENSP00000216044 | ENSP00000326128 |
| ENSP00000216044 | ENSP00000342181 |
| ENSP00000216044 | ENSP00000357047 |
| ENSP00000216044 | ENSP00000357907 |
| ENSP00000216044 | ENSP00000360532 |
| ENSP00000216044 | ENSP00000361467 |
| ENSP00000216044 | ENSP00000362948 |
| ENSP00000216044 | ENSP00000373272 |
| ENSP00000216044 | ENSP00000374455 |
| ENSP00000216044 | ENSP00000377262 |
| ENSP00000216044 | ENSP00000382064 |
| ENSP00000216044 | ENSP00000384391 |
| ENSP00000216044 | ENSP00000391774 |
| ENSP00000216044 | ENSP00000392617 |
| ENSP00000216044 | ENSP00000394869 |
| ENSP00000216068 | ENSP00000254579 |
| ENSP00000216068 | ENSP00000265104 |
| ENSP00000216068 | ENSP00000305503 |
| ENSP00000216068 | ENSP00000321029 |
| ENSP00000216068 | ENSP00000348965 |
| ENSP00000216068 | ENSP00000349016 |
| ENSP00000216068 | ENSP00000352400 |
| ENSP00000216068 | ENSP00000356989 |
| ENSP00000216068 | ENSP00000360473 |

|                 |                 |
|-----------------|-----------------|
| ENSP00000216068 | ENSP00000367841 |
| ENSP00000216068 | ENSP00000414402 |
| ENSP00000216099 | ENSP00000369816 |
| ENSP00000216106 | ENSP00000246337 |
| ENSP00000216106 | ENSP00000364398 |
| ENSP00000216106 | ENSP00000366221 |
| ENSP00000216115 | ENSP00000259075 |
| ENSP00000216115 | ENSP00000267953 |
| ENSP00000216115 | ENSP00000329623 |
| ENSP00000216115 | ENSP00000358022 |
| ENSP00000216129 | ENSP00000276692 |
| ENSP00000216129 | ENSP00000294008 |
| ENSP00000216129 | ENSP00000329466 |
| ENSP00000216133 | ENSP00000217244 |
| ENSP00000216133 | ENSP00000234396 |
| ENSP00000216133 | ENSP00000252108 |
| ENSP00000216133 | ENSP00000263736 |
| ENSP00000216133 | ENSP00000267064 |
| ENSP00000216133 | ENSP00000269197 |
| ENSP00000216133 | ENSP00000269385 |
| ENSP00000216133 | ENSP00000316173 |
| ENSP00000216133 | ENSP00000343535 |
| ENSP00000216133 | ENSP00000356448 |
| ENSP00000216133 | ENSP00000358862 |
| ENSP00000216133 | ENSP00000359321 |
| ENSP00000216133 | ENSP00000361287 |
| ENSP00000216133 | ENSP00000363787 |
| ENSP00000216133 | ENSP00000370151 |
| ENSP00000216133 | ENSP00000396439 |
| ENSP00000216133 | ENSP00000418734 |
| ENSP00000216133 | ENSP00000419494 |
| ENSP00000216139 | ENSP00000368686 |
| ENSP00000216139 | ENSP00000378326 |
| ENSP00000216160 | ENSP00000220751 |
| ENSP00000216160 | ENSP00000250615 |
| ENSP00000216160 | ENSP00000262039 |
| ENSP00000216160 | ENSP00000262177 |
| ENSP00000216160 | ENSP00000288422 |
| ENSP00000216160 | ENSP00000288840 |
| ENSP00000216160 | ENSP00000297185 |
| ENSP00000216160 | ENSP00000299424 |
| ENSP00000216160 | ENSP00000301364 |
| ENSP00000216160 | ENSP00000301838 |
| ENSP00000216160 | ENSP00000325958 |
| ENSP00000216160 | ENSP00000331310 |
| ENSP00000216160 | ENSP00000344668 |



|                 |                 |
|-----------------|-----------------|
| ENSP00000216160 | ENSP00000344683 |
| ENSP00000216160 | ENSP00000346839 |
| ENSP00000216160 | ENSP00000349205 |
| ENSP00000216160 | ENSP00000351141 |
| ENSP00000216160 | ENSP00000356530 |
| ENSP00000216160 | ENSP00000358335 |
| ENSP00000216160 | ENSP00000358997 |
| ENSP00000216160 | ENSP00000360268 |
| ENSP00000216160 | ENSP00000365439 |
| ENSP00000216160 | ENSP00000372023 |
| ENSP00000216160 | ENSP00000375986 |
| ENSP00000216160 | ENSP00000380150 |
| ENSP00000216160 | ENSP00000401445 |
| ENSP00000216185 | ENSP00000216455 |
| ENSP00000216185 | ENSP00000219169 |
| ENSP00000216185 | ENSP00000220959 |
| ENSP00000216185 | ENSP00000222008 |
| ENSP00000216185 | ENSP00000229416 |
| ENSP00000216185 | ENSP00000233893 |
| ENSP00000216185 | ENSP00000241052 |
| ENSP00000216185 | ENSP00000252622 |
| ENSP00000216185 | ENSP00000254250 |
| ENSP00000216185 | ENSP00000259667 |
| ENSP00000216185 | ENSP00000262030 |
| ENSP00000216185 | ENSP00000265462 |
| ENSP00000216185 | ENSP00000286428 |
| ENSP00000216185 | ENSP00000292180 |
| ENSP00000216185 | ENSP00000304908 |
| ENSP00000216185 | ENSP00000307900 |
| ENSP00000216185 | ENSP00000313921 |
| ENSP00000216185 | ENSP00000321259 |
| ENSP00000216185 | ENSP00000327070 |
| ENSP00000216185 | ENSP00000330343 |
| ENSP00000216185 | ENSP00000330836 |
| ENSP00000216185 | ENSP00000331897 |
| ENSP00000216185 | ENSP00000332513 |
| ENSP00000216185 | ENSP00000340278 |
| ENSP00000216185 | ENSP00000342026 |
| ENSP00000216185 | ENSP00000345023 |
| ENSP00000216185 | ENSP00000360286 |
| ENSP00000216185 | ENSP00000363135 |
| ENSP00000216185 | ENSP00000364212 |
| ENSP00000216185 | ENSP00000366620 |
| ENSP00000216185 | ENSP00000379933 |
| ENSP00000216185 | ENSP00000381698 |
| ENSP00000216187 | ENSP00000253413 |

|                 |                 |
|-----------------|-----------------|
| ENSP00000216187 | ENSP00000264065 |
| ENSP00000216187 | ENSP00000296255 |
| ENSP00000216187 | ENSP00000333946 |
| ENSP00000216187 | ENSP00000337053 |
| ENSP00000216190 | ENSP00000216554 |
| ENSP00000216190 | ENSP00000220062 |
| ENSP00000216190 | ENSP00000220849 |
| ENSP00000216190 | ENSP00000225688 |
| ENSP00000216190 | ENSP00000248706 |
| ENSP00000216190 | ENSP00000253108 |
| ENSP00000216190 | ENSP00000261868 |
| ENSP00000216190 | ENSP00000266671 |
| ENSP00000216190 | ENSP00000267396 |
| ENSP00000216190 | ENSP00000281172 |
| ENSP00000216190 | ENSP00000291582 |
| ENSP00000216190 | ENSP00000300249 |
| ENSP00000216190 | ENSP00000310040 |
| ENSP00000216190 | ENSP00000315659 |
| ENSP00000216190 | ENSP00000316845 |
| ENSP00000216190 | ENSP00000327315 |
| ENSP00000216190 | ENSP00000329002 |
| ENSP00000216190 | ENSP00000329466 |
| ENSP00000216190 | ENSP00000329933 |
| ENSP00000216190 | ENSP00000339136 |
| ENSP00000216190 | ENSP00000339299 |
| ENSP00000216190 | ENSP00000348215 |
| ENSP00000216190 | ENSP00000348442 |
| ENSP00000216190 | ENSP00000354125 |
| ENSP00000216190 | ENSP00000355296 |
| ENSP00000216190 | ENSP00000358140 |
| ENSP00000216190 | ENSP00000360020 |
| ENSP00000216190 | ENSP00000361009 |
| ENSP00000216190 | ENSP00000362688 |
| ENSP00000216190 | ENSP00000364749 |
| ENSP00000216190 | ENSP00000369716 |
| ENSP00000216190 | ENSP00000370258 |
| ENSP00000216190 | ENSP00000374213 |
| ENSP00000216190 | ENSP00000377747 |
| ENSP00000216190 | ENSP00000379607 |
| ENSP00000216190 | ENSP00000380450 |
| ENSP00000216190 | ENSP00000381891 |
| ENSP00000216190 | ENSP00000384675 |
| ENSP00000216190 | ENSP00000416892 |
| ENSP00000216194 | ENSP00000251038 |
| ENSP00000216194 | ENSP00000264220 |
| ENSP00000216194 | ENSP00000286621 |

|                 |                 |
|-----------------|-----------------|
| ENSP00000216194 | ENSP00000298532 |
| ENSP00000216194 | ENSP00000304169 |
| ENSP00000216194 | ENSP00000306817 |
| ENSP00000216194 | ENSP00000314440 |
| ENSP00000216194 | ENSP00000335357 |
| ENSP00000216194 | ENSP00000352928 |
| ENSP00000216194 | ENSP00000354125 |
| ENSP00000216194 | ENSP00000355518 |
| ENSP00000216194 | ENSP00000360532 |
| ENSP00000216194 | ENSP00000362717 |
| ENSP00000216194 | ENSP00000367615 |
| ENSP00000216194 | ENSP00000379568 |
| ENSP00000216194 | ENSP00000382595 |
| ENSP00000216194 | ENSP00000382779 |
| ENSP00000216194 | ENSP00000417229 |
| ENSP00000216211 | ENSP00000264234 |
| ENSP00000216218 | ENSP00000229595 |
| ENSP00000216218 | ENSP00000237014 |
| ENSP00000216218 | ENSP00000262844 |
| ENSP00000216218 | ENSP00000263246 |
| ENSP00000216218 | ENSP00000264029 |
| ENSP00000216218 | ENSP00000284981 |
| ENSP00000216218 | ENSP00000294053 |
| ENSP00000216218 | ENSP00000295121 |
| ENSP00000216218 | ENSP00000295897 |
| ENSP00000216218 | ENSP00000296084 |
| ENSP00000216218 | ENSP00000301329 |
| ENSP00000216218 | ENSP00000307900 |
| ENSP00000216218 | ENSP00000312664 |
| ENSP00000216218 | ENSP00000326813 |
| ENSP00000216218 | ENSP00000347548 |
| ENSP00000216218 | ENSP00000347948 |
| ENSP00000216218 | ENSP00000350785 |
| ENSP00000216218 | ENSP00000352706 |
| ENSP00000216218 | ENSP00000357341 |
| ENSP00000216218 | ENSP00000358404 |
| ENSP00000216218 | ENSP00000360916 |
| ENSP00000216218 | ENSP00000368605 |
| ENSP00000216218 | ENSP00000401566 |
| ENSP00000216223 | ENSP00000226730 |
| ENSP00000216223 | ENSP00000296545 |
| ENSP00000216223 | ENSP00000331201 |
| ENSP00000216223 | ENSP00000341208 |
| ENSP00000216223 | ENSP00000345530 |
| ENSP00000216223 | ENSP00000354125 |
| ENSP00000216223 | ENSP00000358043 |

|                 |                 |
|-----------------|-----------------|
| ENSP00000216223 | ENSP00000364898 |
| ENSP00000216223 | ENSP00000366936 |
| ENSP00000216223 | ENSP00000369293 |
| ENSP00000216223 | ENSP00000369312 |
| ENSP00000216223 | ENSP00000409346 |
| ENSP00000216237 | ENSP00000251900 |
| ENSP00000216237 | ENSP00000262133 |
| ENSP00000216237 | ENSP00000262238 |
| ENSP00000216237 | ENSP00000267163 |
| ENSP00000216237 | ENSP00000325634 |
| ENSP00000216237 | ENSP00000341805 |
| ENSP00000216237 | ENSP00000350767 |
| ENSP00000216237 | ENSP00000351490 |
| ENSP00000216237 | ENSP00000351947 |
| ENSP00000216237 | ENSP00000358862 |
| ENSP00000216237 | ENSP00000362166 |
| ENSP00000216237 | ENSP00000363787 |
| ENSP00000216237 | ENSP00000372699 |
| ENSP00000216237 | ENSP00000396271 |
| ENSP00000216237 | ENSP00000396439 |
| ENSP00000216237 | ENSP00000400572 |
| ENSP00000216237 | ENSP00000412190 |
| ENSP00000216237 | ENSP00000419494 |
| ENSP00000216252 | ENSP00000221494 |
| ENSP00000216252 | ENSP00000222969 |
| ENSP00000216252 | ENSP00000227524 |
| ENSP00000216252 | ENSP00000251038 |
| ENSP00000216252 | ENSP00000252115 |
| ENSP00000216252 | ENSP00000262300 |
| ENSP00000216252 | ENSP00000268482 |
| ENSP00000216252 | ENSP00000271628 |
| ENSP00000216252 | ENSP00000301764 |
| ENSP00000216252 | ENSP00000304370 |
| ENSP00000216252 | ENSP00000305790 |
| ENSP00000216252 | ENSP00000310448 |
| ENSP00000216252 | ENSP00000318861 |
| ENSP00000216252 | ENSP00000324122 |
| ENSP00000216252 | ENSP00000331817 |
| ENSP00000216252 | ENSP00000332103 |
| ENSP00000216252 | ENSP00000334148 |
| ENSP00000216252 | ENSP00000335321 |
| ENSP00000216252 | ENSP00000339090 |
| ENSP00000216252 | ENSP00000356520 |
| ENSP00000216252 | ENSP00000366557 |
| ENSP00000216252 | ENSP00000402084 |
| ENSP00000216252 | ENSP00000412566 |

|                 |                 |
|-----------------|-----------------|
| ENSP00000216254 | ENSP00000216484 |
| ENSP00000216254 | ENSP00000219551 |
| ENSP00000216254 | ENSP00000222673 |
| ENSP00000216254 | ENSP00000228318 |
| ENSP00000216254 | ENSP00000234590 |
| ENSP00000216254 | ENSP00000251038 |
| ENSP00000216254 | ENSP00000252699 |
| ENSP00000216254 | ENSP00000253792 |
| ENSP00000216254 | ENSP00000254035 |
| ENSP00000216254 | ENSP00000256379 |
| ENSP00000216254 | ENSP00000262554 |
| ENSP00000216254 | ENSP00000264029 |
| ENSP00000216254 | ENSP00000264161 |
| ENSP00000216254 | ENSP00000268668 |
| ENSP00000216254 | ENSP00000277865 |
| ENSP00000216254 | ENSP00000282541 |
| ENSP00000216254 | ENSP00000283943 |
| ENSP00000216254 | ENSP00000290299 |
| ENSP00000216254 | ENSP00000292475 |
| ENSP00000216254 | ENSP00000294053 |
| ENSP00000216254 | ENSP00000296684 |
| ENSP00000216254 | ENSP00000297598 |
| ENSP00000216254 | ENSP00000300151 |
| ENSP00000216254 | ENSP00000300648 |
| ENSP00000216254 | ENSP00000301587 |
| ENSP00000216254 | ENSP00000301740 |
| ENSP00000216254 | ENSP00000307786 |
| ENSP00000216254 | ENSP00000308610 |
| ENSP00000216254 | ENSP00000317159 |
| ENSP00000216254 | ENSP00000327070 |
| ENSP00000216254 | ENSP00000331897 |
| ENSP00000216254 | ENSP00000333667 |
| ENSP00000216254 | ENSP00000336927 |
| ENSP00000216254 | ENSP00000337127 |
| ENSP00000216254 | ENSP00000339826 |
| ENSP00000216254 | ENSP00000340019 |
| ENSP00000216254 | ENSP00000341838 |
| ENSP00000216254 | ENSP00000342056 |
| ENSP00000216254 | ENSP00000358737 |
| ENSP00000216254 | ENSP00000359454 |
| ENSP00000216254 | ENSP00000361287 |
| ENSP00000216254 | ENSP00000366482 |
| ENSP00000216254 | ENSP00000367923 |
| ENSP00000216254 | ENSP00000368565 |
| ENSP00000216254 | ENSP00000382177 |
| ENSP00000216254 | ENSP00000382269 |

|                 |                 |
|-----------------|-----------------|
| ENSP00000216254 | ENSP00000387262 |
| ENSP00000216254 | ENSP00000389649 |
| ENSP00000216254 | ENSP00000397598 |
| ENSP00000216254 | ENSP00000409275 |
| ENSP00000216254 | ENSP00000420588 |
| ENSP00000216259 | ENSP00000266095 |
| ENSP00000216259 | ENSP00000296255 |
| ENSP00000216259 | ENSP00000300648 |
| ENSP00000216259 | ENSP00000303279 |
| ENSP00000216259 | ENSP00000321239 |
| ENSP00000216259 | ENSP00000324792 |
| ENSP00000216259 | ENSP00000330343 |
| ENSP00000216259 | ENSP00000341679 |
| ENSP00000216259 | ENSP00000344456 |
| ENSP00000216259 | ENSP00000346155 |
| ENSP00000216259 | ENSP00000364794 |
| ENSP00000216274 | ENSP00000216392 |
| ENSP00000216274 | ENSP00000222005 |
| ENSP00000216274 | ENSP00000227758 |
| ENSP00000216274 | ENSP00000248244 |
| ENSP00000216274 | ENSP00000259808 |
| ENSP00000216274 | ENSP00000301838 |
| ENSP00000216274 | ENSP00000305958 |
| ENSP00000216274 | ENSP00000308351 |
| ENSP00000216274 | ENSP00000321503 |
| ENSP00000216274 | ENSP00000332208 |
| ENSP00000216274 | ENSP00000360215 |
| ENSP00000216277 | ENSP00000216727 |
| ENSP00000216277 | ENSP00000230050 |
| ENSP00000216277 | ENSP00000230859 |
| ENSP00000216277 | ENSP00000235090 |
| ENSP00000216277 | ENSP00000238112 |
| ENSP00000216277 | ENSP00000243563 |
| ENSP00000216277 | ENSP00000245838 |
| ENSP00000216277 | ENSP00000245934 |
| ENSP00000216277 | ENSP00000246548 |
| ENSP00000216277 | ENSP00000251038 |
| ENSP00000216277 | ENSP00000253048 |
| ENSP00000216277 | ENSP00000257177 |
| ENSP00000216277 | ENSP00000261211 |
| ENSP00000216277 | ENSP00000262367 |
| ENSP00000216277 | ENSP00000262577 |
| ENSP00000216277 | ENSP00000263202 |
| ENSP00000216277 | ENSP00000264335 |
| ENSP00000216277 | ENSP00000264951 |
| ENSP00000216277 | ENSP00000265073 |

|                 |                 |
|-----------------|-----------------|
| ENSP00000216277 | ENSP00000274606 |
| ENSP00000216277 | ENSP00000277541 |
| ENSP00000216277 | ENSP00000282007 |
| ENSP00000216277 | ENSP00000290158 |
| ENSP00000216277 | ENSP00000290810 |
| ENSP00000216277 | ENSP00000291386 |
| ENSP00000216277 | ENSP00000292476 |
| ENSP00000216277 | ENSP00000295025 |
| ENSP00000216277 | ENSP00000296161 |
| ENSP00000216277 | ENSP00000296490 |
| ENSP00000216277 | ENSP00000296783 |
| ENSP00000216277 | ENSP00000296930 |
| ENSP00000216277 | ENSP00000298281 |
| ENSP00000216277 | ENSP00000299767 |
| ENSP00000216277 | ENSP00000300291 |
| ENSP00000216277 | ENSP00000312735 |
| ENSP00000216277 | ENSP00000314348 |
| ENSP00000216277 | ENSP00000315791 |
| ENSP00000216277 | ENSP00000317872 |
| ENSP00000216277 | ENSP00000321711 |
| ENSP00000216277 | ENSP00000322885 |
| ENSP00000216277 | ENSP00000325377 |
| ENSP00000216277 | ENSP00000326699 |
| ENSP00000216277 | ENSP00000328169 |
| ENSP00000216277 | ENSP00000332444 |
| ENSP00000216277 | ENSP00000334061 |
| ENSP00000216277 | ENSP00000336752 |
| ENSP00000216277 | ENSP00000338413 |
| ENSP00000216277 | ENSP00000339245 |
| ENSP00000216277 | ENSP00000339353 |
| ENSP00000216277 | ENSP00000348010 |
| ENSP00000216277 | ENSP00000348565 |
| ENSP00000216277 | ENSP00000354340 |
| ENSP00000216277 | ENSP00000359531 |
| ENSP00000216277 | ENSP00000361076 |
| ENSP00000216277 | ENSP00000361949 |
| ENSP00000216277 | ENSP00000366135 |
| ENSP00000216277 | ENSP00000367406 |
| ENSP00000216277 | ENSP00000368017 |
| ENSP00000216277 | ENSP00000386134 |
| ENSP00000216277 | ENSP00000391774 |
| ENSP00000216277 | ENSP00000401435 |
| ENSP00000216277 | ENSP00000414187 |
| ENSP00000216286 | ENSP00000252034 |
| ENSP00000216286 | ENSP00000363827 |
| ENSP00000216286 | ENSP00000384169 |

|                 |                 |
|-----------------|-----------------|
| ENSP00000216294 | ENSP00000267163 |
| ENSP00000216294 | ENSP00000283921 |
| ENSP00000216294 | ENSP00000298532 |
| ENSP00000216294 | ENSP00000319597 |
| ENSP00000216294 | ENSP00000343129 |
| ENSP00000216297 | ENSP00000217244 |
| ENSP00000216297 | ENSP00000219252 |
| ENSP00000216297 | ENSP00000219473 |
| ENSP00000216297 | ENSP00000220659 |
| ENSP00000216297 | ENSP00000220669 |
| ENSP00000216297 | ENSP00000221265 |
| ENSP00000216297 | ENSP00000224140 |
| ENSP00000216297 | ENSP00000225504 |
| ENSP00000216297 | ENSP00000225688 |
| ENSP00000216297 | ENSP00000225916 |
| ENSP00000216297 | ENSP00000229595 |
| ENSP00000216297 | ENSP00000238616 |
| ENSP00000216297 | ENSP00000238789 |
| ENSP00000216297 | ENSP00000247219 |
| ENSP00000216297 | ENSP00000251127 |
| ENSP00000216297 | ENSP00000252445 |
| ENSP00000216297 | ENSP00000253107 |
| ENSP00000216297 | ENSP00000254719 |
| ENSP00000216297 | ENSP00000254900 |
| ENSP00000216297 | ENSP00000255078 |
| ENSP00000216297 | ENSP00000256398 |
| ENSP00000216297 | ENSP00000257575 |
| ENSP00000216297 | ENSP00000261424 |
| ENSP00000216297 | ENSP00000261951 |
| ENSP00000216297 | ENSP00000262315 |
| ENSP00000216297 | ENSP00000262519 |
| ENSP00000216297 | ENSP00000262544 |
| ENSP00000216297 | ENSP00000262608 |
| ENSP00000216297 | ENSP00000262794 |
| ENSP00000216297 | ENSP00000262803 |
| ENSP00000216297 | ENSP00000263201 |
| ENSP00000216297 | ENSP00000263208 |
| ENSP00000216297 | ENSP00000263274 |
| ENSP00000216297 | ENSP00000263736 |
| ENSP00000216297 | ENSP00000263795 |
| ENSP00000216297 | ENSP00000263857 |
| ENSP00000216297 | ENSP00000265304 |
| ENSP00000216297 | ENSP00000265990 |
| ENSP00000216297 | ENSP00000267197 |
| ENSP00000216297 | ENSP00000269127 |
| ENSP00000216297 | ENSP00000272444 |



|                 |                 |
|-----------------|-----------------|
| ENSP00000216297 | ENSP00000275053 |
| ENSP00000216297 | ENSP00000276533 |
| ENSP00000216297 | ENSP00000278412 |
| ENSP00000216297 | ENSP00000280614 |
| ENSP00000216297 | ENSP00000283351 |
| ENSP00000216297 | ENSP00000283875 |
| ENSP00000216297 | ENSP00000287239 |
| ENSP00000216297 | ENSP00000290649 |
| ENSP00000216297 | ENSP00000294339 |
| ENSP00000216297 | ENSP00000296273 |
| ENSP00000216297 | ENSP00000296328 |
| ENSP00000216297 | ENSP00000298852 |
| ENSP00000216297 | ENSP00000299601 |
| ENSP00000216297 | ENSP00000302640 |
| ENSP00000216297 | ENSP00000303511 |
| ENSP00000216297 | ENSP00000304051 |
| ENSP00000216297 | ENSP00000305958 |
| ENSP00000216297 | ENSP00000306124 |
| ENSP00000216297 | ENSP00000307208 |
| ENSP00000216297 | ENSP00000309142 |
| ENSP00000216297 | ENSP00000310966 |
| ENSP00000216297 | ENSP00000312625 |
| ENSP00000216297 | ENSP00000313420 |
| ENSP00000216297 | ENSP00000314949 |
| ENSP00000216297 | ENSP00000319104 |
| ENSP00000216297 | ENSP00000319799 |
| ENSP00000216297 | ENSP00000322570 |
| ENSP00000216297 | ENSP00000326477 |
| ENSP00000216297 | ENSP00000329029 |
| ENSP00000216297 | ENSP00000329662 |
| ENSP00000216297 | ENSP00000329933 |
| ENSP00000216297 | ENSP00000330074 |
| ENSP00000216297 | ENSP00000331211 |
| ENSP00000216297 | ENSP00000334538 |
| ENSP00000216297 | ENSP00000336856 |
| ENSP00000216297 | ENSP00000342434 |
| ENSP00000216297 | ENSP00000343190 |
| ENSP00000216297 | ENSP00000343741 |
| ENSP00000216297 | ENSP00000344504 |
| ENSP00000216297 | ENSP00000347168 |
| ENSP00000216297 | ENSP00000348168 |
| ENSP00000216297 | ENSP00000349213 |
| ENSP00000216297 | ENSP00000349393 |
| ENSP00000216297 | ENSP00000350708 |
| ENSP00000216297 | ENSP00000350767 |
| ENSP00000216297 | ENSP00000351250 |

|                 |                 |
|-----------------|-----------------|
| ENSP00000216297 | ENSP00000351524 |
| ENSP00000216297 | ENSP00000351697 |
| ENSP00000216297 | ENSP00000351947 |
| ENSP00000216297 | ENSP00000353622 |
| ENSP00000216297 | ENSP00000353698 |
| ENSP00000216297 | ENSP00000353793 |
| ENSP00000216297 | ENSP00000354522 |
| ENSP00000216297 | ENSP00000354977 |
| ENSP00000216297 | ENSP00000355013 |
| ENSP00000216297 | ENSP00000355759 |
| ENSP00000216297 | ENSP00000356290 |
| ENSP00000216297 | ENSP00000356405 |
| ENSP00000216297 | ENSP00000357602 |
| ENSP00000216297 | ENSP00000357965 |
| ENSP00000216297 | ENSP00000358147 |
| ENSP00000216297 | ENSP00000358423 |
| ENSP00000216297 | ENSP00000358497 |
| ENSP00000216297 | ENSP00000359531 |
| ENSP00000216297 | ENSP00000359552 |
| ENSP00000216297 | ENSP00000360515 |
| ENSP00000216297 | ENSP00000360532 |
| ENSP00000216297 | ENSP00000360817 |
| ENSP00000216297 | ENSP00000361465 |
| ENSP00000216297 | ENSP00000361642 |
| ENSP00000216297 | ENSP00000362900 |
| ENSP00000216297 | ENSP00000364289 |
| ENSP00000216297 | ENSP00000365025 |
| ENSP00000216297 | ENSP00000366395 |
| ENSP00000216297 | ENSP00000366974 |
| ENSP00000216297 | ENSP00000367029 |
| ENSP00000216297 | ENSP00000367034 |
| ENSP00000216297 | ENSP00000367787 |
| ENSP00000216297 | ENSP00000368349 |
| ENSP00000216297 | ENSP00000369411 |
| ENSP00000216297 | ENSP00000369716 |
| ENSP00000216297 | ENSP00000370151 |
| ENSP00000216297 | ENSP00000372023 |
| ENSP00000216297 | ENSP00000374280 |
| ENSP00000216297 | ENSP00000377747 |
| ENSP00000216297 | ENSP00000378350 |
| ENSP00000216297 | ENSP00000379372 |
| ENSP00000216297 | ENSP00000379607 |
| ENSP00000216297 | ENSP00000380414 |
| ENSP00000216297 | ENSP00000384597 |
| ENSP00000216297 | ENSP00000386239 |
| ENSP00000216297 | ENSP00000386759 |

|                 |                 |
|-----------------|-----------------|
| ENSP00000216297 | ENSP00000392028 |
| ENSP00000216297 | ENSP00000396704 |
| ENSP00000216297 | ENSP00000420588 |
| ENSP00000216330 | ENSP00000217244 |
| ENSP00000216330 | ENSP00000222247 |
| ENSP00000216330 | ENSP00000222567 |
| ENSP00000216330 | ENSP00000227322 |
| ENSP00000216330 | ENSP00000227474 |
| ENSP00000216330 | ENSP00000233893 |
| ENSP00000216330 | ENSP00000246802 |
| ENSP00000216330 | ENSP00000247970 |
| ENSP00000216330 | ENSP00000248566 |
| ENSP00000216330 | ENSP00000251038 |
| ENSP00000216330 | ENSP00000254193 |
| ENSP00000216330 | ENSP00000254605 |
| ENSP00000216330 | ENSP00000254940 |
| ENSP00000216330 | ENSP00000257934 |
| ENSP00000216330 | ENSP00000261868 |
| ENSP00000216330 | ENSP00000262238 |
| ENSP00000216330 | ENSP00000263657 |
| ENSP00000216330 | ENSP00000264995 |
| ENSP00000216330 | ENSP00000265073 |
| ENSP00000216330 | ENSP00000265963 |
| ENSP00000216330 | ENSP00000272065 |
| ENSP00000216330 | ENSP00000296802 |
| ENSP00000216330 | ENSP00000302801 |
| ENSP00000216330 | ENSP00000305682 |
| ENSP00000216330 | ENSP00000317992 |
| ENSP00000216330 | ENSP00000322396 |
| ENSP00000216330 | ENSP00000330343 |
| ENSP00000216330 | ENSP00000338862 |
| ENSP00000216330 | ENSP00000351141 |
| ENSP00000216330 | ENSP00000354040 |
| ENSP00000216330 | ENSP00000354558 |
| ENSP00000216330 | ENSP00000356548 |
| ENSP00000216330 | ENSP00000356989 |
| ENSP00000216330 | ENSP00000358812 |
| ENSP00000216330 | ENSP00000359345 |
| ENSP00000216330 | ENSP00000359688 |
| ENSP00000216330 | ENSP00000360412 |
| ENSP00000216330 | ENSP00000363384 |
| ENSP00000216330 | ENSP00000365025 |
| ENSP00000216330 | ENSP00000368438 |
| ENSP00000216330 | ENSP00000368856 |
| ENSP00000216330 | ENSP00000368927 |
| ENSP00000216330 | ENSP00000369396 |

|                 |                 |
|-----------------|-----------------|
| ENSP00000216330 | ENSP00000370105 |
| ENSP00000216330 | ENSP00000371888 |
| ENSP00000216330 | ENSP00000373509 |
| ENSP00000216330 | ENSP00000374399 |
| ENSP00000216330 | ENSP00000379888 |
| ENSP00000216330 | ENSP00000380982 |
| ENSP00000216330 | ENSP00000381657 |
| ENSP00000216330 | ENSP00000399511 |
| ENSP00000216330 | ENSP00000402338 |
| ENSP00000216330 | ENSP00000417281 |
| ENSP00000216330 | ENSP00000420714 |
| ENSP00000216367 | ENSP00000230859 |
| ENSP00000216367 | ENSP00000233146 |
| ENSP00000216367 | ENSP00000234420 |
| ENSP00000216367 | ENSP00000246802 |
| ENSP00000216367 | ENSP00000253462 |
| ENSP00000216367 | ENSP00000254719 |
| ENSP00000216367 | ENSP00000257177 |
| ENSP00000216367 | ENSP00000260810 |
| ENSP00000216367 | ENSP00000261211 |
| ENSP00000216367 | ENSP00000262315 |
| ENSP00000216367 | ENSP00000262460 |
| ENSP00000216367 | ENSP00000263201 |
| ENSP00000216367 | ENSP00000264169 |
| ENSP00000216367 | ENSP00000265081 |
| ENSP00000216367 | ENSP00000265140 |
| ENSP00000216367 | ENSP00000269159 |
| ENSP00000216367 | ENSP00000278412 |
| ENSP00000216367 | ENSP00000288976 |
| ENSP00000216367 | ENSP00000293406 |
| ENSP00000216367 | ENSP00000296783 |
| ENSP00000216367 | ENSP00000297990 |
| ENSP00000216367 | ENSP00000307850 |
| ENSP00000216367 | ENSP00000311368 |
| ENSP00000216367 | ENSP00000314348 |
| ENSP00000216367 | ENSP00000316879 |
| ENSP00000216367 | ENSP00000322570 |
| ENSP00000216367 | ENSP00000335357 |
| ENSP00000216367 | ENSP00000338573 |
| ENSP00000216367 | ENSP00000338788 |
| ENSP00000216367 | ENSP00000340281 |
| ENSP00000216367 | ENSP00000345096 |
| ENSP00000216367 | ENSP00000351697 |
| ENSP00000216367 | ENSP00000354040 |
| ENSP00000216367 | ENSP00000354125 |
| ENSP00000216367 | ENSP00000354723 |

|                 |                 |
|-----------------|-----------------|
| ENSP00000216367 | ENSP00000354916 |
| ENSP00000216367 | ENSP00000358563 |
| ENSP00000216367 | ENSP00000360031 |
| ENSP00000216367 | ENSP00000360621 |
| ENSP00000216367 | ENSP00000368438 |
| ENSP00000216367 | ENSP00000369757 |
| ENSP00000216367 | ENSP00000370151 |
| ENSP00000216367 | ENSP00000380460 |
| ENSP00000216367 | ENSP00000380504 |
| ENSP00000216367 | ENSP00000401018 |
| ENSP00000216367 | ENSP00000417229 |
| ENSP00000216367 | ENSP00000417281 |
| ENSP00000216392 | ENSP00000222286 |
| ENSP00000216392 | ENSP00000234040 |
| ENSP00000216392 | ENSP00000238994 |
| ENSP00000216392 | ENSP00000254035 |
| ENSP00000216392 | ENSP00000263056 |
| ENSP00000216392 | ENSP00000264233 |
| ENSP00000216392 | ENSP00000267484 |
| ENSP00000216392 | ENSP00000268124 |
| ENSP00000216392 | ENSP00000282541 |
| ENSP00000216392 | ENSP00000284601 |
| ENSP00000216392 | ENSP00000314949 |
| ENSP00000216392 | ENSP00000321636 |
| ENSP00000216392 | ENSP00000329466 |
| ENSP00000216392 | ENSP00000330484 |
| ENSP00000216392 | ENSP00000331897 |
| ENSP00000216392 | ENSP00000336927 |
| ENSP00000216392 | ENSP00000337127 |
| ENSP00000216392 | ENSP00000337838 |
| ENSP00000216392 | ENSP00000342032 |
| ENSP00000216392 | ENSP00000354558 |
| ENSP00000216392 | ENSP00000359096 |
| ENSP00000216392 | ENSP00000359100 |
| ENSP00000216392 | ENSP00000359818 |
| ENSP00000216392 | ENSP00000362413 |
| ENSP00000216392 | ENSP00000363873 |
| ENSP00000216392 | ENSP00000372316 |
| ENSP00000216392 | ENSP00000381863 |
| ENSP00000216392 | ENSP00000393832 |
| ENSP00000216410 | ENSP00000216455 |
| ENSP00000216410 | ENSP00000240922 |
| ENSP00000216410 | ENSP00000244204 |
| ENSP00000216410 | ENSP00000253108 |
| ENSP00000216410 | ENSP00000264995 |
| ENSP00000216410 | ENSP00000282541 |

|                 |                 |
|-----------------|-----------------|
| ENSP00000216410 | ENSP00000300146 |
| ENSP00000216410 | ENSP00000302160 |
| ENSP00000216410 | ENSP00000360621 |
| ENSP00000216410 | ENSP00000379678 |
| ENSP00000216410 | ENSP00000379888 |
| ENSP00000216410 | ENSP00000387170 |
| ENSP00000216420 | ENSP00000288774 |
| ENSP00000216420 | ENSP00000360116 |
| ENSP00000216442 | ENSP00000231487 |
| ENSP00000216442 | ENSP00000234396 |
| ENSP00000216442 | ENSP00000249289 |
| ENSP00000216442 | ENSP00000251038 |
| ENSP00000216442 | ENSP00000251076 |
| ENSP00000216442 | ENSP00000253413 |
| ENSP00000216442 | ENSP00000272238 |
| ENSP00000216442 | ENSP00000273398 |
| ENSP00000216442 | ENSP00000290949 |
| ENSP00000216442 | ENSP00000299138 |
| ENSP00000216442 | ENSP00000332247 |
| ENSP00000216442 | ENSP00000352522 |
| ENSP00000216442 | ENSP00000362085 |
| ENSP00000216442 | ENSP00000363162 |
| ENSP00000216452 | ENSP00000369820 |
| ENSP00000216455 | ENSP00000216832 |
| ENSP00000216455 | ENSP00000217244 |
| ENSP00000216455 | ENSP00000219313 |
| ENSP00000216455 | ENSP00000219548 |
| ENSP00000216455 | ENSP00000222308 |
| ENSP00000216455 | ENSP00000232905 |
| ENSP00000216455 | ENSP00000233084 |
| ENSP00000216455 | ENSP00000234160 |
| ENSP00000216455 | ENSP00000239938 |
| ENSP00000216455 | ENSP00000244741 |
| ENSP00000216455 | ENSP00000251038 |
| ENSP00000216455 | ENSP00000251303 |
| ENSP00000216455 | ENSP00000252329 |
| ENSP00000216455 | ENSP00000253003 |
| ENSP00000216455 | ENSP00000253693 |
| ENSP00000216455 | ENSP00000259457 |
| ENSP00000216455 | ENSP00000259469 |
| ENSP00000216455 | ENSP00000259569 |
| ENSP00000216455 | ENSP00000261601 |
| ENSP00000216455 | ENSP00000261712 |
| ENSP00000216455 | ENSP00000262030 |
| ENSP00000216455 | ENSP00000262193 |
| ENSP00000216455 | ENSP00000263413 |

|                 |                 |
|-----------------|-----------------|
| ENSP00000216455 | ENSP00000264639 |
| ENSP00000216455 | ENSP00000265148 |
| ENSP00000216455 | ENSP00000266735 |
| ENSP00000216455 | ENSP00000268058 |
| ENSP00000216455 | ENSP00000277865 |
| ENSP00000216455 | ENSP00000280346 |
| ENSP00000216455 | ENSP00000282050 |
| ENSP00000216455 | ENSP00000282728 |
| ENSP00000216455 | ENSP00000290541 |
| ENSP00000216455 | ENSP00000293362 |
| ENSP00000216455 | ENSP00000295901 |
| ENSP00000216455 | ENSP00000297185 |
| ENSP00000216455 | ENSP00000298852 |
| ENSP00000216455 | ENSP00000299767 |
| ENSP00000216455 | ENSP00000307143 |
| ENSP00000216455 | ENSP00000309474 |
| ENSP00000216455 | ENSP00000310129 |
| ENSP00000216455 | ENSP00000311083 |
| ENSP00000216455 | ENSP00000311505 |
| ENSP00000216455 | ENSP00000314129 |
| ENSP00000216455 | ENSP00000318195 |
| ENSP00000216455 | ENSP00000325448 |
| ENSP00000216455 | ENSP00000325919 |
| ENSP00000216455 | ENSP00000328940 |
| ENSP00000216455 | ENSP00000329915 |
| ENSP00000216455 | ENSP00000333122 |
| ENSP00000216455 | ENSP00000338629 |
| ENSP00000216455 | ENSP00000340019 |
| ENSP00000216455 | ENSP00000341243 |
| ENSP00000216455 | ENSP00000343313 |
| ENSP00000216455 | ENSP00000343535 |
| ENSP00000216455 | ENSP00000346437 |
| ENSP00000216455 | ENSP00000346453 |
| ENSP00000216455 | ENSP00000347948 |
| ENSP00000216455 | ENSP00000348442 |
| ENSP00000216455 | ENSP00000350708 |
| ENSP00000216455 | ENSP00000354673 |
| ENSP00000216455 | ENSP00000355922 |
| ENSP00000216455 | ENSP00000358404 |
| ENSP00000216455 | ENSP00000359206 |
| ENSP00000216455 | ENSP00000359531 |
| ENSP00000216455 | ENSP00000360060 |
| ENSP00000216455 | ENSP00000362334 |
| ENSP00000216455 | ENSP00000362413 |
| ENSP00000216455 | ENSP00000365175 |
| ENSP00000216455 | ENSP00000370222 |

|                 |                 |
|-----------------|-----------------|
| ENSP00000216455 | ENSP00000370376 |
| ENSP00000216455 | ENSP00000370611 |
| ENSP00000216455 | ENSP00000370741 |
| ENSP00000216455 | ENSP00000371546 |
| ENSP00000216455 | ENSP00000373918 |
| ENSP00000216455 | ENSP00000379607 |
| ENSP00000216455 | ENSP00000379933 |
| ENSP00000216455 | ENSP00000380349 |
| ENSP00000216455 | ENSP00000381036 |
| ENSP00000216455 | ENSP00000384211 |
| ENSP00000216455 | ENSP00000387477 |
| ENSP00000216455 | ENSP00000396937 |
| ENSP00000216455 | ENSP00000412566 |
| ENSP00000216455 | ENSP00000416583 |
| ENSP00000216455 | ENSP00000417281 |
| ENSP00000216465 | ENSP00000216951 |
| ENSP00000216465 | ENSP00000284719 |
| ENSP00000216465 | ENSP00000339435 |
| ENSP00000216465 | ENSP00000353622 |
| ENSP00000216465 | ENSP00000356257 |
| ENSP00000216465 | ENSP00000414670 |
| ENSP00000216479 | ENSP00000216774 |
| ENSP00000216479 | ENSP00000219066 |
| ENSP00000216479 | ENSP00000221232 |
| ENSP00000216479 | ENSP00000222005 |
| ENSP00000216479 | ENSP00000227322 |
| ENSP00000216479 | ENSP00000232978 |
| ENSP00000216479 | ENSP00000233623 |
| ENSP00000216479 | ENSP00000236959 |
| ENSP00000216479 | ENSP00000244763 |
| ENSP00000216479 | ENSP00000246062 |
| ENSP00000216479 | ENSP00000251038 |
| ENSP00000216479 | ENSP00000253792 |
| ENSP00000216479 | ENSP00000256854 |
| ENSP00000216479 | ENSP00000260956 |
| ENSP00000216479 | ENSP00000260970 |
| ENSP00000216479 | ENSP00000262030 |
| ENSP00000216479 | ENSP00000262544 |
| ENSP00000216479 | ENSP00000264161 |
| ENSP00000216479 | ENSP00000265351 |
| ENSP00000216479 | ENSP00000267884 |
| ENSP00000216479 | ENSP00000282999 |
| ENSP00000216479 | ENSP00000283943 |
| ENSP00000216479 | ENSP00000284719 |
| ENSP00000216479 | ENSP00000295702 |
| ENSP00000216479 | ENSP00000296255 |



|                 |                 |
|-----------------|-----------------|
| ENSP00000216479 | ENSP00000296273 |
| ENSP00000216479 | ENSP00000296509 |
| ENSP00000216479 | ENSP00000298852 |
| ENSP00000216479 | ENSP00000299767 |
| ENSP00000216479 | ENSP00000300648 |
| ENSP00000216479 | ENSP00000302478 |
| ENSP00000216479 | ENSP00000305958 |
| ENSP00000216479 | ENSP00000309474 |
| ENSP00000216479 | ENSP00000310129 |
| ENSP00000216479 | ENSP00000312066 |
| ENSP00000216479 | ENSP00000317331 |
| ENSP00000216479 | ENSP00000317334 |
| ENSP00000216479 | ENSP00000332887 |
| ENSP00000216479 | ENSP00000340019 |
| ENSP00000216479 | ENSP00000341213 |
| ENSP00000216479 | ENSP00000342181 |
| ENSP00000216479 | ENSP00000346791 |
| ENSP00000216479 | ENSP00000349142 |
| ENSP00000216479 | ENSP00000354876 |
| ENSP00000216479 | ENSP00000355890 |
| ENSP00000216479 | ENSP00000361949 |
| ENSP00000216479 | ENSP00000363559 |
| ENSP00000216479 | ENSP00000367208 |
| ENSP00000216479 | ENSP00000367923 |
| ENSP00000216479 | ENSP00000373918 |
| ENSP00000216479 | ENSP00000378890 |
| ENSP00000216479 | ENSP00000381003 |
| ENSP00000216479 | ENSP00000382269 |
| ENSP00000216479 | ENSP00000386918 |
| ENSP00000216479 | ENSP00000391944 |
| ENSP00000216479 | ENSP00000396452 |
| ENSP00000216484 | ENSP00000217901 |
| ENSP00000216484 | ENSP00000219368 |
| ENSP00000216484 | ENSP00000228318 |
| ENSP00000216484 | ENSP00000232014 |
| ENSP00000216484 | ENSP00000233616 |
| ENSP00000216484 | ENSP00000245222 |
| ENSP00000216484 | ENSP00000247225 |
| ENSP00000216484 | ENSP00000258052 |
| ENSP00000216484 | ENSP00000262554 |
| ENSP00000216484 | ENSP00000264335 |
| ENSP00000216484 | ENSP00000265351 |
| ENSP00000216484 | ENSP00000302790 |
| ENSP00000216484 | ENSP00000326869 |
| ENSP00000216484 | ENSP00000336712 |
| ENSP00000216484 | ENSP00000346453 |

|                 |                 |
|-----------------|-----------------|
| ENSP00000216484 | ENSP00000355890 |
| ENSP00000216484 | ENSP00000359000 |
| ENSP00000216484 | ENSP00000361287 |
| ENSP00000216484 | ENSP00000362298 |
| ENSP00000216487 | ENSP00000222008 |
| ENSP00000216487 | ENSP00000244007 |
| ENSP00000216487 | ENSP00000300574 |
| ENSP00000216489 | ENSP00000262177 |
| ENSP00000216492 | ENSP00000220478 |
| ENSP00000216492 | ENSP00000317714 |
| ENSP00000216492 | ENSP00000340914 |
| ENSP00000216492 | ENSP00000368244 |
| ENSP00000216500 | ENSP00000216554 |
| ENSP00000216500 | ENSP00000256383 |
| ENSP00000216500 | ENSP00000261875 |
| ENSP00000216500 | ENSP00000266126 |
| ENSP00000216500 | ENSP00000273783 |
| ENSP00000216500 | ENSP00000306894 |
| ENSP00000216500 | ENSP00000315925 |
| ENSP00000216500 | ENSP00000330408 |
| ENSP00000216500 | ENSP00000353575 |
| ENSP00000216500 | ENSP00000355308 |
| ENSP00000216500 | ENSP00000359067 |
| ENSP00000216500 | ENSP00000361057 |
| ENSP00000216500 | ENSP00000364119 |
| ENSP00000216500 | ENSP00000370607 |
| ENSP00000216500 | ENSP00000394869 |
| ENSP00000216513 | ENSP00000297261 |
| ENSP00000216513 | ENSP00000347294 |
| ENSP00000216554 | ENSP00000217244 |
| ENSP00000216554 | ENSP00000219313 |
| ENSP00000216554 | ENSP00000219439 |
| ENSP00000216554 | ENSP00000220659 |
| ENSP00000216554 | ENSP00000232905 |
| ENSP00000216554 | ENSP00000246337 |
| ENSP00000216554 | ENSP00000253108 |
| ENSP00000216554 | ENSP00000256383 |
| ENSP00000216554 | ENSP00000261708 |
| ENSP00000216554 | ENSP00000261868 |
| ENSP00000216554 | ENSP00000263629 |
| ENSP00000216554 | ENSP00000263791 |
| ENSP00000216554 | ENSP00000264705 |
| ENSP00000216554 | ENSP00000265245 |
| ENSP00000216554 | ENSP00000266126 |
| ENSP00000216554 | ENSP00000270625 |
| ENSP00000216554 | ENSP00000273783 |

|                 |                 |
|-----------------|-----------------|
| ENSP00000216554 | ENSP00000280557 |
| ENSP00000216554 | ENSP00000284292 |
| ENSP00000216554 | ENSP00000289371 |
| ENSP00000216554 | ENSP00000296577 |
| ENSP00000216554 | ENSP00000302896 |
| ENSP00000216554 | ENSP00000307889 |
| ENSP00000216554 | ENSP00000309334 |
| ENSP00000216554 | ENSP00000310040 |
| ENSP00000216554 | ENSP00000312042 |
| ENSP00000216554 | ENSP00000316879 |
| ENSP00000216554 | ENSP00000318646 |
| ENSP00000216554 | ENSP00000326806 |
| ENSP00000216554 | ENSP00000329029 |
| ENSP00000216554 | ENSP00000330343 |
| ENSP00000216554 | ENSP00000330408 |
| ENSP00000216554 | ENSP00000336702 |
| ENSP00000216554 | ENSP00000339095 |
| ENSP00000216554 | ENSP00000340281 |
| ENSP00000216554 | ENSP00000346067 |
| ENSP00000216554 | ENSP00000346725 |
| ENSP00000216554 | ENSP00000350512 |
| ENSP00000216554 | ENSP00000352928 |
| ENSP00000216554 | ENSP00000353741 |
| ENSP00000216554 | ENSP00000354040 |
| ENSP00000216554 | ENSP00000354125 |
| ENSP00000216554 | ENSP00000356146 |
| ENSP00000216554 | ENSP00000358140 |
| ENSP00000216554 | ENSP00000359531 |
| ENSP00000216554 | ENSP00000362688 |
| ENSP00000216554 | ENSP00000364119 |
| ENSP00000216554 | ENSP00000365025 |
| ENSP00000216554 | ENSP00000365806 |
| ENSP00000216554 | ENSP00000368927 |
| ENSP00000216554 | ENSP00000369757 |
| ENSP00000216554 | ENSP00000370258 |
| ENSP00000216554 | ENSP00000373090 |
| ENSP00000216554 | ENSP00000391723 |
| ENSP00000216554 | ENSP00000394290 |
| ENSP00000216554 | ENSP00000403576 |
| ENSP00000216554 | ENSP00000409074 |
| ENSP00000216554 | ENSP00000409367 |
| ENSP00000216554 | ENSP00000411162 |
| ENSP00000216554 | ENSP00000417229 |
| ENSP00000216727 | ENSP00000229922 |
| ENSP00000216727 | ENSP00000230859 |
| ENSP00000216727 | ENSP00000240185 |

|                 |                 |
|-----------------|-----------------|
| ENSP00000216727 | ENSP00000250003 |
| ENSP00000216727 | ENSP00000261531 |
| ENSP00000216727 | ENSP00000263265 |
| ENSP00000216727 | ENSP00000265271 |
| ENSP00000216727 | ENSP00000272203 |
| ENSP00000216727 | ENSP00000296930 |
| ENSP00000216727 | ENSP00000302768 |
| ENSP00000216727 | ENSP00000302886 |
| ENSP00000216727 | ENSP00000310649 |
| ENSP00000216727 | ENSP00000316879 |
| ENSP00000216727 | ENSP00000318195 |
| ENSP00000216727 | ENSP00000318318 |
| ENSP00000216727 | ENSP00000321711 |
| ENSP00000216727 | ENSP00000325690 |
| ENSP00000216727 | ENSP00000331817 |
| ENSP00000216727 | ENSP00000331879 |
| ENSP00000216727 | ENSP00000332444 |
| ENSP00000216727 | ENSP00000336712 |
| ENSP00000216727 | ENSP00000336752 |
| ENSP00000216727 | ENSP00000340281 |
| ENSP00000216727 | ENSP00000360922 |
| ENSP00000216727 | ENSP00000361949 |
| ENSP00000216727 | ENSP00000362820 |
| ENSP00000216727 | ENSP00000365877 |
| ENSP00000216727 | ENSP00000366135 |
| ENSP00000216727 | ENSP00000368017 |
| ENSP00000216727 | ENSP00000368824 |
| ENSP00000216727 | ENSP00000379607 |
| ENSP00000216727 | ENSP00000394400 |
| ENSP00000216756 | ENSP00000323099 |
| ENSP00000216756 | ENSP00000343741 |
| ENSP00000216774 | ENSP00000223641 |
| ENSP00000216774 | ENSP00000239944 |
| ENSP00000216774 | ENSP00000248673 |
| ENSP00000216774 | ENSP00000253099 |
| ENSP00000216774 | ENSP00000259469 |
| ENSP00000216774 | ENSP00000260102 |
| ENSP00000216774 | ENSP00000260956 |
| ENSP00000216774 | ENSP00000261531 |
| ENSP00000216774 | ENSP00000262027 |
| ENSP00000216774 | ENSP00000262584 |
| ENSP00000216774 | ENSP00000264995 |
| ENSP00000216774 | ENSP00000265100 |
| ENSP00000216774 | ENSP00000267884 |
| ENSP00000216774 | ENSP00000268661 |
| ENSP00000216774 | ENSP00000282050 |

|                 |                 |
|-----------------|-----------------|
| ENSP00000216774 | ENSP00000282276 |
| ENSP00000216774 | ENSP00000282388 |
| ENSP00000216774 | ENSP00000282999 |
| ENSP00000216774 | ENSP00000288937 |
| ENSP00000216774 | ENSP00000294053 |
| ENSP00000216774 | ENSP00000295890 |
| ENSP00000216774 | ENSP00000298283 |
| ENSP00000216774 | ENSP00000300151 |
| ENSP00000216774 | ENSP00000302896 |
| ENSP00000216774 | ENSP00000306548 |
| ENSP00000216774 | ENSP00000308897 |
| ENSP00000216774 | ENSP00000311028 |
| ENSP00000216774 | ENSP00000311430 |
| ENSP00000216774 | ENSP00000312066 |
| ENSP00000216774 | ENSP00000314311 |
| ENSP00000216774 | ENSP00000315859 |
| ENSP00000216774 | ENSP00000317376 |
| ENSP00000216774 | ENSP00000320508 |
| ENSP00000216774 | ENSP00000326981 |
| ENSP00000216774 | ENSP00000328023 |
| ENSP00000216774 | ENSP00000339795 |
| ENSP00000216774 | ENSP00000341082 |
| ENSP00000216774 | ENSP00000342181 |
| ENSP00000216774 | ENSP00000346015 |
| ENSP00000216774 | ENSP00000346022 |
| ENSP00000216774 | ENSP00000353826 |
| ENSP00000216774 | ENSP00000354525 |
| ENSP00000216774 | ENSP00000354739 |
| ENSP00000216774 | ENSP00000359345 |
| ENSP00000216774 | ENSP00000360532 |
| ENSP00000216774 | ENSP00000361287 |
| ENSP00000216774 | ENSP00000363676 |
| ENSP00000216774 | ENSP00000366121 |
| ENSP00000216774 | ENSP00000373404 |
| ENSP00000216774 | ENSP00000375730 |
| ENSP00000216774 | ENSP00000377486 |
| ENSP00000216774 | ENSP00000377865 |
| ENSP00000216774 | ENSP00000379865 |
| ENSP00000216774 | ENSP00000382595 |
| ENSP00000216774 | ENSP00000389103 |
| ENSP00000216774 | ENSP00000396704 |
| ENSP00000216774 | ENSP00000403817 |
| ENSP00000216774 | ENSP00000416959 |
| ENSP00000216832 | ENSP00000221494 |
| ENSP00000216832 | ENSP00000251102 |
| ENSP00000216832 | ENSP00000253363 |

|                 |                 |
|-----------------|-----------------|
| ENSP00000216832 | ENSP00000260970 |
| ENSP00000216832 | ENSP00000261531 |
| ENSP00000216832 | ENSP00000301740 |
| ENSP00000216832 | ENSP00000311825 |
| ENSP00000216832 | ENSP00000315859 |
| ENSP00000216832 | ENSP00000326261 |
| ENSP00000216832 | ENSP00000329466 |
| ENSP00000216832 | ENSP00000337194 |
| ENSP00000216832 | ENSP00000337340 |
| ENSP00000216832 | ENSP00000343557 |
| ENSP00000216832 | ENSP00000358242 |
| ENSP00000216832 | ENSP00000358554 |
| ENSP00000216832 | ENSP00000360532 |
| ENSP00000216832 | ENSP00000361162 |
| ENSP00000216832 | ENSP00000362900 |
| ENSP00000216832 | ENSP00000365318 |
| ENSP00000216832 | ENSP00000366557 |
| ENSP00000216832 | ENSP00000379607 |
| ENSP00000216832 | ENSP00000383142 |
| ENSP00000216840 | ENSP00000219476 |
| ENSP00000216840 | ENSP00000246166 |
| ENSP00000216840 | ENSP00000251038 |
| ENSP00000216840 | ENSP00000286317 |
| ENSP00000216840 | ENSP00000355511 |
| ENSP00000216840 | ENSP00000363708 |
| ENSP00000216840 | ENSP00000366557 |
| ENSP00000216840 | ENSP00000366607 |
| ENSP00000216840 | ENSP00000394071 |
| ENSP00000216879 | ENSP00000217173 |
| ENSP00000216879 | ENSP00000219548 |
| ENSP00000216879 | ENSP00000220669 |
| ENSP00000216879 | ENSP00000240185 |
| ENSP00000216879 | ENSP00000252108 |
| ENSP00000216879 | ENSP00000252115 |
| ENSP00000216879 | ENSP00000255764 |
| ENSP00000216879 | ENSP00000259512 |
| ENSP00000216879 | ENSP00000263202 |
| ENSP00000216879 | ENSP00000267884 |
| ENSP00000216879 | ENSP00000276416 |
| ENSP00000216879 | ENSP00000280700 |
| ENSP00000216879 | ENSP00000289528 |
| ENSP00000216879 | ENSP00000294179 |
| ENSP00000216879 | ENSP00000297540 |
| ENSP00000216879 | ENSP00000309031 |
| ENSP00000216879 | ENSP00000309474 |
| ENSP00000216879 | ENSP00000310129 |

|                 |                 |
|-----------------|-----------------|
| ENSP00000216879 | ENSP00000321617 |
| ENSP00000216879 | ENSP00000326813 |
| ENSP00000216879 | ENSP00000331487 |
| ENSP00000216879 | ENSP00000331817 |
| ENSP00000216879 | ENSP00000341947 |
| ENSP00000216879 | ENSP00000343001 |
| ENSP00000216879 | ENSP00000346088 |
| ENSP00000216879 | ENSP00000348602 |
| ENSP00000216879 | ENSP00000364486 |
| ENSP00000216879 | ENSP00000375881 |
| ENSP00000216879 | ENSP00000380460 |
| ENSP00000216879 | ENSP00000382562 |
| ENSP00000216923 | ENSP00000312649 |
| ENSP00000216923 | ENSP00000318373 |
| ENSP00000216923 | ENSP00000347301 |
| ENSP00000216923 | ENSP00000378503 |
| ENSP00000216951 | ENSP00000229416 |
| ENSP00000216951 | ENSP00000241052 |
| ENSP00000216951 | ENSP00000251038 |
| ENSP00000216951 | ENSP00000263228 |
| ENSP00000216951 | ENSP00000272286 |
| ENSP00000216951 | ENSP00000276603 |
| ENSP00000216951 | ENSP00000354995 |
| ENSP00000216951 | ENSP00000365943 |
| ENSP00000216968 | ENSP00000257430 |
| ENSP00000216968 | ENSP00000321326 |
| ENSP00000216968 | ENSP00000339191 |
| ENSP00000217109 | ENSP00000243563 |
| ENSP00000217109 | ENSP00000260947 |
| ENSP00000217109 | ENSP00000261531 |
| ENSP00000217109 | ENSP00000262077 |
| ENSP00000217109 | ENSP00000263857 |
| ENSP00000217109 | ENSP00000292476 |
| ENSP00000217109 | ENSP00000314733 |
| ENSP00000217109 | ENSP00000314949 |
| ENSP00000217109 | ENSP00000315791 |
| ENSP00000217109 | ENSP00000318861 |
| ENSP00000217109 | ENSP00000336752 |
| ENSP00000217109 | ENSP00000350283 |
| ENSP00000217109 | ENSP00000366557 |
| ENSP00000217109 | ENSP00000368438 |
| ENSP00000217109 | ENSP00000379339 |
| ENSP00000217130 | ENSP00000269468 |
| ENSP00000217130 | ENSP00000285021 |
| ENSP00000217130 | ENSP00000339845 |
| ENSP00000217173 | ENSP00000231524 |

|                 |                 |
|-----------------|-----------------|
| ENSP00000217173 | ENSP00000231790 |
| ENSP00000217173 | ENSP00000263202 |
| ENSP00000217173 | ENSP00000283943 |
| ENSP00000217173 | ENSP00000321617 |
| ENSP00000217173 | ENSP00000326813 |
| ENSP00000217173 | ENSP00000326921 |
| ENSP00000217173 | ENSP00000328203 |
| ENSP00000217173 | ENSP00000331201 |
| ENSP00000217173 | ENSP00000331487 |
| ENSP00000217173 | ENSP00000340305 |
| ENSP00000217173 | ENSP00000347498 |
| ENSP00000217173 | ENSP00000347836 |
| ENSP00000217173 | ENSP00000347997 |
| ENSP00000217173 | ENSP00000350708 |
| ENSP00000217173 | ENSP00000354883 |
| ENSP00000217173 | ENSP00000363338 |
| ENSP00000217173 | ENSP00000369531 |
| ENSP00000217173 | ENSP00000380460 |
| ENSP00000217195 | ENSP00000254942 |
| ENSP00000217244 | ENSP00000217515 |
| ENSP00000217244 | ENSP00000219700 |
| ENSP00000217244 | ENSP00000220058 |
| ENSP00000217244 | ENSP00000221265 |
| ENSP00000217244 | ENSP00000222005 |
| ENSP00000217244 | ENSP00000222330 |
| ENSP00000217244 | ENSP00000225504 |
| ENSP00000217244 | ENSP00000225983 |
| ENSP00000217244 | ENSP00000226218 |
| ENSP00000217244 | ENSP00000227163 |
| ENSP00000217244 | ENSP00000228916 |
| ENSP00000217244 | ENSP00000229251 |
| ENSP00000217244 | ENSP00000229595 |
| ENSP00000217244 | ENSP00000230056 |
| ENSP00000217244 | ENSP00000236192 |
| ENSP00000217244 | ENSP00000236979 |
| ENSP00000217244 | ENSP00000237596 |
| ENSP00000217244 | ENSP00000238789 |
| ENSP00000217244 | ENSP00000239938 |
| ENSP00000217244 | ENSP00000244496 |
| ENSP00000217244 | ENSP00000244741 |
| ENSP00000217244 | ENSP00000245960 |
| ENSP00000217244 | ENSP00000246891 |
| ENSP00000217244 | ENSP00000247970 |
| ENSP00000217244 | ENSP00000252445 |
| ENSP00000217244 | ENSP00000252622 |
| ENSP00000217244 | ENSP00000253107 |



|                 |                 |
|-----------------|-----------------|
| ENSP00000217244 | ENSP00000253693 |
| ENSP00000217244 | ENSP00000254079 |
| ENSP00000217244 | ENSP00000254301 |
| ENSP00000217244 | ENSP00000256474 |
| ENSP00000217244 | ENSP00000256897 |
| ENSP00000217244 | ENSP00000257181 |
| ENSP00000217244 | ENSP00000257430 |
| ENSP00000217244 | ENSP00000260803 |
| ENSP00000217244 | ENSP00000261245 |
| ENSP00000217244 | ENSP00000261448 |
| ENSP00000217244 | ENSP00000262367 |
| ENSP00000217244 | ENSP00000263228 |
| ENSP00000217244 | ENSP00000263274 |
| ENSP00000217244 | ENSP00000264670 |
| ENSP00000217244 | ENSP00000264834 |
| ENSP00000217244 | ENSP00000265073 |
| ENSP00000217244 | ENSP00000265354 |
| ENSP00000217244 | ENSP00000265372 |
| ENSP00000217244 | ENSP00000265462 |
| ENSP00000217244 | ENSP00000267812 |
| ENSP00000217244 | ENSP00000268058 |
| ENSP00000217244 | ENSP00000268605 |
| ENSP00000217244 | ENSP00000268717 |
| ENSP00000217244 | ENSP00000269127 |
| ENSP00000217244 | ENSP00000269385 |
| ENSP00000217244 | ENSP00000269397 |
| ENSP00000217244 | ENSP00000272937 |
| ENSP00000217244 | ENSP00000273480 |
| ENSP00000217244 | ENSP00000273783 |
| ENSP00000217244 | ENSP00000276072 |
| ENSP00000217244 | ENSP00000278412 |
| ENSP00000217244 | ENSP00000279392 |
| ENSP00000217244 | ENSP00000281043 |
| ENSP00000217244 | ENSP00000283882 |
| ENSP00000217244 | ENSP00000283928 |
| ENSP00000217244 | ENSP00000285243 |
| ENSP00000217244 | ENSP00000287878 |
| ENSP00000217244 | ENSP00000294008 |
| ENSP00000217244 | ENSP00000295685 |
| ENSP00000217244 | ENSP00000296028 |
| ENSP00000217244 | ENSP00000296509 |
| ENSP00000217244 | ENSP00000297338 |
| ENSP00000217244 | ENSP00000297990 |
| ENSP00000217244 | ENSP00000298281 |
| ENSP00000217244 | ENSP00000299259 |
| ENSP00000217244 | ENSP00000299543 |

|                 |                 |
|-----------------|-----------------|
| ENSP00000217244 | ENSP00000299601 |
| ENSP00000217244 | ENSP00000299767 |
| ENSP00000217244 | ENSP00000302111 |
| ENSP00000217244 | ENSP00000302640 |
| ENSP00000217244 | ENSP00000302935 |
| ENSP00000217244 | ENSP00000305790 |
| ENSP00000217244 | ENSP00000305958 |
| ENSP00000217244 | ENSP00000306245 |
| ENSP00000217244 | ENSP00000307491 |
| ENSP00000217244 | ENSP00000308750 |
| ENSP00000217244 | ENSP00000310040 |
| ENSP00000217244 | ENSP00000310042 |
| ENSP00000217244 | ENSP00000311677 |
| ENSP00000217244 | ENSP00000312042 |
| ENSP00000217244 | ENSP00000312664 |
| ENSP00000217244 | ENSP00000312735 |
| ENSP00000217244 | ENSP00000313420 |
| ENSP00000217244 | ENSP00000314620 |
| ENSP00000217244 | ENSP00000314949 |
| ENSP00000217244 | ENSP00000314971 |
| ENSP00000217244 | ENSP00000315859 |
| ENSP00000217244 | ENSP00000316454 |
| ENSP00000217244 | ENSP00000317904 |
| ENSP00000217244 | ENSP00000318195 |
| ENSP00000217244 | ENSP00000318604 |
| ENSP00000217244 | ENSP00000318822 |
| ENSP00000217244 | ENSP00000319104 |
| ENSP00000217244 | ENSP00000321449 |
| ENSP00000217244 | ENSP00000322419 |
| ENSP00000217244 | ENSP00000325120 |
| ENSP00000217244 | ENSP00000327179 |
| ENSP00000217244 | ENSP00000329029 |
| ENSP00000217244 | ENSP00000329357 |
| ENSP00000217244 | ENSP00000329419 |
| ENSP00000217244 | ENSP00000329466 |
| ENSP00000217244 | ENSP00000330753 |
| ENSP00000217244 | ENSP00000334538 |
| ENSP00000217244 | ENSP00000336752 |
| ENSP00000217244 | ENSP00000338345 |
| ENSP00000217244 | ENSP00000339191 |
| ENSP00000217244 | ENSP00000340671 |
| ENSP00000217244 | ENSP00000342011 |
| ENSP00000217244 | ENSP00000342681 |
| ENSP00000217244 | ENSP00000343190 |
| ENSP00000217244 | ENSP00000344456 |
| ENSP00000217244 | ENSP00000344572 |

|                 |                 |
|-----------------|-----------------|
| ENSP00000217244 | ENSP00000346566 |
| ENSP00000217244 | ENSP00000347168 |
| ENSP00000217244 | ENSP00000347329 |
| ENSP00000217244 | ENSP00000347548 |
| ENSP00000217244 | ENSP00000348577 |
| ENSP00000217244 | ENSP00000348877 |
| ENSP00000217244 | ENSP00000349437 |
| ENSP00000217244 | ENSP00000349640 |
| ENSP00000217244 | ENSP00000350283 |
| ENSP00000217244 | ENSP00000350704 |
| ENSP00000217244 | ENSP00000350757 |
| ENSP00000217244 | ENSP00000350767 |
| ENSP00000217244 | ENSP00000351284 |
| ENSP00000217244 | ENSP00000351407 |
| ENSP00000217244 | ENSP00000351490 |
| ENSP00000217244 | ENSP00000351492 |
| ENSP00000217244 | ENSP00000351575 |
| ENSP00000217244 | ENSP00000351885 |
| ENSP00000217244 | ENSP00000351947 |
| ENSP00000217244 | ENSP00000352257 |
| ENSP00000217244 | ENSP00000353622 |
| ENSP00000217244 | ENSP00000353698 |
| ENSP00000217244 | ENSP00000353741 |
| ENSP00000217244 | ENSP00000354125 |
| ENSP00000217244 | ENSP00000354522 |
| ENSP00000217244 | ENSP00000354558 |
| ENSP00000217244 | ENSP00000355013 |
| ENSP00000217244 | ENSP00000355051 |
| ENSP00000217244 | ENSP00000355899 |
| ENSP00000217244 | ENSP00000356346 |
| ENSP00000217244 | ENSP00000356405 |
| ENSP00000217244 | ENSP00000357113 |
| ENSP00000217244 | ENSP00000357789 |
| ENSP00000217244 | ENSP00000357998 |
| ENSP00000217244 | ENSP00000358120 |
| ENSP00000217244 | ENSP00000358140 |
| ENSP00000217244 | ENSP00000358404 |
| ENSP00000217244 | ENSP00000359345 |
| ENSP00000217244 | ENSP00000360497 |
| ENSP00000217244 | ENSP00000360821 |
| ENSP00000217244 | ENSP00000362824 |
| ENSP00000217244 | ENSP00000364119 |
| ENSP00000217244 | ENSP00000365025 |
| ENSP00000217244 | ENSP00000365891 |
| ENSP00000217244 | ENSP00000366271 |
| ENSP00000217244 | ENSP00000366974 |

|                 |                 |
|-----------------|-----------------|
| ENSP00000217244 | ENSP00000367034 |
| ENSP00000217244 | ENSP00000367208 |
| ENSP00000217244 | ENSP00000368438 |
| ENSP00000217244 | ENSP00000369162 |
| ENSP00000217244 | ENSP00000369716 |
| ENSP00000217244 | ENSP00000370571 |
| ENSP00000217244 | ENSP00000370589 |
| ENSP00000217244 | ENSP00000372654 |
| ENSP00000217244 | ENSP00000374280 |
| ENSP00000217244 | ENSP00000374455 |
| ENSP00000217244 | ENSP00000377218 |
| ENSP00000217244 | ENSP00000377262 |
| ENSP00000217244 | ENSP00000377372 |
| ENSP00000217244 | ENSP00000377747 |
| ENSP00000217244 | ENSP00000377969 |
| ENSP00000217244 | ENSP00000378517 |
| ENSP00000217244 | ENSP00000379457 |
| ENSP00000217244 | ENSP00000380414 |
| ENSP00000217244 | ENSP00000380982 |
| ENSP00000217244 | ENSP00000382779 |
| ENSP00000217244 | ENSP00000384026 |
| ENSP00000217244 | ENSP00000384313 |
| ENSP00000217244 | ENSP00000384597 |
| ENSP00000217244 | ENSP00000386621 |
| ENSP00000217244 | ENSP00000386759 |
| ENSP00000217244 | ENSP00000391944 |
| ENSP00000217244 | ENSP00000392028 |
| ENSP00000217244 | ENSP00000402084 |
| ENSP00000217244 | ENSP00000402935 |
| ENSP00000217244 | ENSP00000409167 |
| ENSP00000217244 | ENSP00000419494 |
| ENSP00000217246 | ENSP00000254942 |
| ENSP00000217246 | ENSP00000276603 |
| ENSP00000217372 | ENSP00000265295 |
| ENSP00000217372 | ENSP00000323046 |
| ENSP00000217446 | ENSP00000251038 |
| ENSP00000217446 | ENSP00000256031 |
| ENSP00000217446 | ENSP00000261534 |
| ENSP00000217446 | ENSP00000278243 |
| ENSP00000217446 | ENSP00000299626 |
| ENSP00000217446 | ENSP00000300658 |
| ENSP00000217446 | ENSP00000309430 |
| ENSP00000217446 | ENSP00000326699 |
| ENSP00000217446 | ENSP00000334052 |
| ENSP00000217446 | ENSP00000340466 |
| ENSP00000217446 | ENSP00000347206 |

|                 |                 |
|-----------------|-----------------|
| ENSP00000217446 | ENSP00000350263 |
| ENSP00000217446 | ENSP00000359848 |
| ENSP00000217446 | ENSP00000360644 |
| ENSP00000217446 | ENSP00000415203 |
| ENSP00000217455 | ENSP00000334044 |
| ENSP00000217455 | ENSP00000339484 |
| ENSP00000217455 | ENSP00000366249 |
| ENSP00000217455 | ENSP00000368699 |
| ENSP00000217455 | ENSP00000373039 |
| ENSP00000217455 | ENSP00000387262 |
| ENSP00000217455 | ENSP00000396152 |
| ENSP00000217455 | ENSP00000410416 |
| ENSP00000217515 | ENSP00000219313 |
| ENSP00000217515 | ENSP00000233893 |
| ENSP00000217515 | ENSP00000234590 |
| ENSP00000217515 | ENSP00000261601 |
| ENSP00000217515 | ENSP00000265462 |
| ENSP00000217515 | ENSP00000286428 |
| ENSP00000217515 | ENSP00000292180 |
| ENSP00000217515 | ENSP00000295901 |
| ENSP00000217515 | ENSP00000296577 |
| ENSP00000217515 | ENSP00000298852 |
| ENSP00000217515 | ENSP00000302160 |
| ENSP00000217515 | ENSP00000310129 |
| ENSP00000217515 | ENSP00000313921 |
| ENSP00000217515 | ENSP00000330836 |
| ENSP00000217515 | ENSP00000340237 |
| ENSP00000217515 | ENSP00000362110 |
| ENSP00000217515 | ENSP00000375881 |
| ENSP00000217893 | ENSP00000225916 |
| ENSP00000217893 | ENSP00000233242 |
| ENSP00000217893 | ENSP00000240055 |
| ENSP00000217893 | ENSP00000240316 |
| ENSP00000217893 | ENSP00000246548 |
| ENSP00000217893 | ENSP00000247843 |
| ENSP00000217893 | ENSP00000251038 |
| ENSP00000217893 | ENSP00000252996 |
| ENSP00000217893 | ENSP00000254037 |
| ENSP00000217893 | ENSP00000256383 |
| ENSP00000217893 | ENSP00000256398 |
| ENSP00000217893 | ENSP00000256854 |
| ENSP00000217893 | ENSP00000256996 |
| ENSP00000217893 | ENSP00000259469 |
| ENSP00000217893 | ENSP00000260956 |
| ENSP00000217893 | ENSP00000261531 |
| ENSP00000217893 | ENSP00000261593 |

|                 |                 |
|-----------------|-----------------|
| ENSP00000217893 | ENSP00000262039 |
| ENSP00000217893 | ENSP00000263390 |
| ENSP00000217893 | ENSP00000263974 |
| ENSP00000217893 | ENSP00000264193 |
| ENSP00000217893 | ENSP00000264335 |
| ENSP00000217893 | ENSP00000264515 |
| ENSP00000217893 | ENSP00000264834 |
| ENSP00000217893 | ENSP00000264883 |
| ENSP00000217893 | ENSP00000265970 |
| ENSP00000217893 | ENSP00000265990 |
| ENSP00000217893 | ENSP00000272286 |
| ENSP00000217893 | ENSP00000276072 |
| ENSP00000217893 | ENSP00000278616 |
| ENSP00000217893 | ENSP00000283882 |
| ENSP00000217893 | ENSP00000294168 |
| ENSP00000217893 | ENSP00000298937 |
| ENSP00000217893 | ENSP00000299424 |
| ENSP00000217893 | ENSP00000303315 |
| ENSP00000217893 | ENSP00000305422 |
| ENSP00000217893 | ENSP00000305790 |
| ENSP00000217893 | ENSP00000306983 |
| ENSP00000217893 | ENSP00000307684 |
| ENSP00000217893 | ENSP00000307850 |
| ENSP00000217893 | ENSP00000309555 |
| ENSP00000217893 | ENSP00000311028 |
| ENSP00000217893 | ENSP00000311505 |
| ENSP00000217893 | ENSP00000313420 |
| ENSP00000217893 | ENSP00000314311 |
| ENSP00000217893 | ENSP00000316114 |
| ENSP00000217893 | ENSP00000331310 |
| ENSP00000217893 | ENSP00000338413 |
| ENSP00000217893 | ENSP00000339109 |
| ENSP00000217893 | ENSP00000339529 |
| ENSP00000217893 | ENSP00000341805 |
| ENSP00000217893 | ENSP00000343701 |
| ENSP00000217893 | ENSP00000343741 |
| ENSP00000217893 | ENSP00000344537 |
| ENSP00000217893 | ENSP00000345702 |
| ENSP00000217893 | ENSP00000347733 |
| ENSP00000217893 | ENSP00000350283 |
| ENSP00000217893 | ENSP00000350967 |
| ENSP00000217893 | ENSP00000352121 |
| ENSP00000217893 | ENSP00000352673 |
| ENSP00000217893 | ENSP00000353575 |
| ENSP00000217893 | ENSP00000354558 |
| ENSP00000217893 | ENSP00000354633 |

|                 |                 |
|-----------------|-----------------|
| ENSP00000217893 | ENSP00000354951 |
| ENSP00000217893 | ENSP00000354995 |
| ENSP00000217893 | ENSP00000358854 |
| ENSP00000217893 | ENSP00000358886 |
| ENSP00000217893 | ENSP00000359531 |
| ENSP00000217893 | ENSP00000360515 |
| ENSP00000217893 | ENSP00000362068 |
| ENSP00000217893 | ENSP00000362688 |
| ENSP00000217893 | ENSP00000363779 |
| ENSP00000217893 | ENSP00000364895 |
| ENSP00000217893 | ENSP00000367406 |
| ENSP00000217893 | ENSP00000369695 |
| ENSP00000217893 | ENSP00000369736 |
| ENSP00000217893 | ENSP00000369871 |
| ENSP00000217893 | ENSP00000389182 |
| ENSP00000217893 | ENSP00000397259 |
| ENSP00000217893 | ENSP00000402515 |
| ENSP00000217901 | ENSP00000222673 |
| ENSP00000217901 | ENSP00000253792 |
| ENSP00000217901 | ENSP00000259569 |
| ENSP00000217901 | ENSP00000263201 |
| ENSP00000217901 | ENSP00000264705 |
| ENSP00000217901 | ENSP00000265195 |
| ENSP00000217901 | ENSP00000269122 |
| ENSP00000217901 | ENSP00000273398 |
| ENSP00000217901 | ENSP00000280346 |
| ENSP00000217901 | ENSP00000300648 |
| ENSP00000217901 | ENSP00000310623 |
| ENSP00000217901 | ENSP00000313953 |
| ENSP00000217901 | ENSP00000317159 |
| ENSP00000217901 | ENSP00000327070 |
| ENSP00000217901 | ENSP00000331897 |
| ENSP00000217901 | ENSP00000333946 |
| ENSP00000217901 | ENSP00000335261 |
| ENSP00000217901 | ENSP00000335304 |
| ENSP00000217901 | ENSP00000342056 |
| ENSP00000217901 | ENSP00000346173 |
| ENSP00000217901 | ENSP00000346453 |
| ENSP00000217901 | ENSP00000350230 |
| ENSP00000217901 | ENSP00000353826 |
| ENSP00000217901 | ENSP00000355013 |
| ENSP00000217901 | ENSP00000361699 |
| ENSP00000217901 | ENSP00000365534 |
| ENSP00000217901 | ENSP00000367923 |
| ENSP00000217901 | ENSP00000368439 |
| ENSP00000217901 | ENSP00000369757 |

|                 |                 |
|-----------------|-----------------|
| ENSP00000217901 | ENSP00000377446 |
| ENSP00000217901 | ENSP00000377527 |
| ENSP00000217901 | ENSP00000378782 |
| ENSP00000217901 | ENSP00000387262 |
| ENSP00000217939 | ENSP00000232905 |
| ENSP00000217939 | ENSP00000258418 |
| ENSP00000217964 | ENSP00000219473 |
| ENSP00000217964 | ENSP00000225983 |
| ENSP00000217964 | ENSP00000231487 |
| ENSP00000217964 | ENSP00000232978 |
| ENSP00000217964 | ENSP00000247843 |
| ENSP00000217964 | ENSP00000251038 |
| ENSP00000217964 | ENSP00000251871 |
| ENSP00000217964 | ENSP00000255764 |
| ENSP00000217964 | ENSP00000256031 |
| ENSP00000217964 | ENSP00000256379 |
| ENSP00000217964 | ENSP00000258648 |
| ENSP00000217964 | ENSP00000260970 |
| ENSP00000217964 | ENSP00000262518 |
| ENSP00000217964 | ENSP00000262519 |
| ENSP00000217964 | ENSP00000262904 |
| ENSP00000217964 | ENSP00000263121 |
| ENSP00000217964 | ENSP00000263205 |
| ENSP00000217964 | ENSP00000264160 |
| ENSP00000217964 | ENSP00000264637 |
| ENSP00000217964 | ENSP00000265175 |
| ENSP00000217964 | ENSP00000265350 |
| ENSP00000217964 | ENSP00000267064 |
| ENSP00000217964 | ENSP00000267101 |
| ENSP00000217964 | ENSP00000267176 |
| ENSP00000217964 | ENSP00000267197 |
| ENSP00000217964 | ENSP00000267415 |
| ENSP00000217964 | ENSP00000276603 |
| ENSP00000217964 | ENSP00000277541 |
| ENSP00000217964 | ENSP00000281928 |
| ENSP00000217964 | ENSP00000283195 |
| ENSP00000217964 | ENSP00000286317 |
| ENSP00000217964 | ENSP00000290158 |
| ENSP00000217964 | ENSP00000290663 |
| ENSP00000217964 | ENSP00000292035 |
| ENSP00000217964 | ENSP00000293777 |
| ENSP00000217964 | ENSP00000296755 |
| ENSP00000217964 | ENSP00000297338 |
| ENSP00000217964 | ENSP00000297347 |
| ENSP00000217964 | ENSP00000300231 |
| ENSP00000217964 | ENSP00000304593 |



|                 |                 |
|-----------------|-----------------|
| ENSP00000217964 | ENSP00000308699 |
| ENSP00000217964 | ENSP00000311028 |
| ENSP00000217964 | ENSP00000312262 |
| ENSP00000217964 | ENSP00000313829 |
| ENSP00000217964 | ENSP00000315791 |
| ENSP00000217964 | ENSP00000320566 |
| ENSP00000217964 | ENSP00000323302 |
| ENSP00000217964 | ENSP00000323720 |
| ENSP00000217964 | ENSP00000325612 |
| ENSP00000217964 | ENSP00000326128 |
| ENSP00000217964 | ENSP00000326767 |
| ENSP00000217964 | ENSP00000328169 |
| ENSP00000217964 | ENSP00000334188 |
| ENSP00000217964 | ENSP00000336842 |
| ENSP00000217964 | ENSP00000344456 |
| ENSP00000217964 | ENSP00000348551 |
| ENSP00000217964 | ENSP00000353622 |
| ENSP00000217964 | ENSP00000355205 |
| ENSP00000217964 | ENSP00000356405 |
| ENSP00000217964 | ENSP00000356448 |
| ENSP00000217964 | ENSP00000356652 |
| ENSP00000217964 | ENSP00000356989 |
| ENSP00000217964 | ENSP00000357047 |
| ENSP00000217964 | ENSP00000357494 |
| ENSP00000217964 | ENSP00000357887 |
| ENSP00000217964 | ENSP00000357907 |
| ENSP00000217964 | ENSP00000360371 |
| ENSP00000217964 | ENSP00000360621 |
| ENSP00000217964 | ENSP00000362948 |
| ENSP00000217964 | ENSP00000363313 |
| ENSP00000217964 | ENSP00000363734 |
| ENSP00000217964 | ENSP00000364929 |
| ENSP00000217964 | ENSP00000370826 |
| ENSP00000217964 | ENSP00000372694 |
| ENSP00000217964 | ENSP00000374213 |
| ENSP00000217964 | ENSP00000381216 |
| ENSP00000217964 | ENSP00000384048 |
| ENSP00000217964 | ENSP00000386759 |
| ENSP00000217964 | ENSP00000391774 |
| ENSP00000217964 | ENSP00000392617 |
| ENSP00000217964 | ENSP00000412319 |
| ENSP00000217964 | ENSP00000415678 |
| ENSP00000217999 | ENSP00000226218 |
| ENSP00000217999 | ENSP00000372023 |
| ENSP00000218004 | ENSP00000283195 |
| ENSP00000218004 | ENSP00000290158 |

|                 |                 |
|-----------------|-----------------|
| ENSP00000218004 | ENSP00000300128 |
| ENSP00000218004 | ENSP00000336712 |
| ENSP00000218004 | ENSP00000348577 |
| ENSP00000218006 | ENSP00000229922 |
| ENSP00000218006 | ENSP00000251102 |
| ENSP00000218006 | ENSP00000262460 |
| ENSP00000218006 | ENSP00000264917 |
| ENSP00000218006 | ENSP00000337127 |
| ENSP00000218006 | ENSP00000351015 |
| ENSP00000218006 | ENSP00000367208 |
| ENSP00000218056 | ENSP00000253003 |
| ENSP00000218056 | ENSP00000256398 |
| ENSP00000218056 | ENSP00000282892 |
| ENSP00000218056 | ENSP00000298937 |
| ENSP00000218056 | ENSP00000304593 |
| ENSP00000218056 | ENSP00000334061 |
| ENSP00000218056 | ENSP00000357907 |
| ENSP00000218056 | ENSP00000360473 |
| ENSP00000218056 | ENSP00000386759 |
| ENSP00000218056 | ENSP00000396937 |
| ENSP00000218104 | ENSP00000254942 |
| ENSP00000218104 | ENSP00000256216 |
| ENSP00000218104 | ENSP00000258873 |
| ENSP00000218104 | ENSP00000264951 |
| ENSP00000218104 | ENSP00000300146 |
| ENSP00000218104 | ENSP00000302160 |
| ENSP00000218104 | ENSP00000346067 |
| ENSP00000218104 | ENSP00000349016 |
| ENSP00000218104 | ENSP00000350249 |
| ENSP00000218104 | ENSP00000357051 |
| ENSP00000218104 | ENSP00000360798 |
| ENSP00000218104 | ENSP00000370719 |
| ENSP00000218104 | ENSP00000410758 |
| ENSP00000218147 | ENSP00000225983 |
| ENSP00000218147 | ENSP00000419494 |
| ENSP00000218364 | ENSP00000221448 |
| ENSP00000218364 | ENSP00000221494 |
| ENSP00000218364 | ENSP00000225504 |
| ENSP00000218364 | ENSP00000227524 |
| ENSP00000218364 | ENSP00000233084 |
| ENSP00000218364 | ENSP00000251038 |
| ENSP00000218364 | ENSP00000254193 |
| ENSP00000218364 | ENSP00000261531 |
| ENSP00000218364 | ENSP00000301764 |
| ENSP00000218364 | ENSP00000303015 |
| ENSP00000218364 | ENSP00000305790 |

|                 |                 |
|-----------------|-----------------|
| ENSP00000218364 | ENSP00000307863 |
| ENSP00000218364 | ENSP00000310723 |
| ENSP00000218364 | ENSP00000314949 |
| ENSP00000218364 | ENSP00000335321 |
| ENSP00000218364 | ENSP00000340823 |
| ENSP00000218364 | ENSP00000346236 |
| ENSP00000218364 | ENSP00000354522 |
| ENSP00000218364 | ENSP00000361577 |
| ENSP00000218364 | ENSP00000362110 |
| ENSP00000218364 | ENSP00000362900 |
| ENSP00000218364 | ENSP00000366557 |
| ENSP00000218364 | ENSP00000368801 |
| ENSP00000218364 | ENSP00000380982 |
| ENSP00000218364 | ENSP00000412566 |
| ENSP00000218516 | ENSP00000285599 |
| ENSP00000218516 | ENSP00000353655 |
| ENSP00000218516 | ENSP00000409279 |
| ENSP00000218652 | ENSP00000220763 |
| ENSP00000218652 | ENSP00000223051 |
| ENSP00000218652 | ENSP00000251968 |
| ENSP00000218652 | ENSP00000262052 |
| ENSP00000218652 | ENSP00000297265 |
| ENSP00000218652 | ENSP00000297290 |
| ENSP00000218652 | ENSP00000300658 |
| ENSP00000218652 | ENSP00000311200 |
| ENSP00000218652 | ENSP00000324560 |
| ENSP00000218652 | ENSP00000326921 |
| ENSP00000218652 | ENSP00000331201 |
| ENSP00000218652 | ENSP00000337127 |
| ENSP00000218652 | ENSP00000345530 |
| ENSP00000218652 | ENSP00000347408 |
| ENSP00000218652 | ENSP00000347498 |
| ENSP00000218652 | ENSP00000367299 |
| ENSP00000218652 | ENSP00000374328 |
| ENSP00000218652 | ENSP00000379500 |
| ENSP00000218652 | ENSP00000400312 |
| ENSP00000218652 | ENSP00000404705 |
| ENSP00000218758 | ENSP00000272322 |
| ENSP00000218758 | ENSP00000273398 |
| ENSP00000218758 | ENSP00000314499 |
| ENSP00000218758 | ENSP00000378517 |
| ENSP00000219022 | ENSP00000300589 |
| ENSP00000219066 | ENSP00000222286 |
| ENSP00000219066 | ENSP00000224862 |
| ENSP00000219066 | ENSP00000230859 |
| ENSP00000219066 | ENSP00000231790 |

|                 |                 |
|-----------------|-----------------|
| ENSP00000219066 | ENSP00000233146 |
| ENSP00000219066 | ENSP00000234420 |
| ENSP00000219066 | ENSP00000242576 |
| ENSP00000219066 | ENSP00000258428 |
| ENSP00000219066 | ENSP00000263187 |
| ENSP00000219066 | ENSP00000264926 |
| ENSP00000219066 | ENSP00000265081 |
| ENSP00000219066 | ENSP00000265849 |
| ENSP00000219066 | ENSP00000267430 |
| ENSP00000219066 | ENSP00000282999 |
| ENSP00000219066 | ENSP00000288985 |
| ENSP00000219066 | ENSP00000296273 |
| ENSP00000219066 | ENSP00000306080 |
| ENSP00000219066 | ENSP00000306561 |
| ENSP00000219066 | ENSP00000307853 |
| ENSP00000219066 | ENSP00000308944 |
| ENSP00000219066 | ENSP00000310520 |
| ENSP00000219066 | ENSP00000318977 |
| ENSP00000219066 | ENSP00000322570 |
| ENSP00000219066 | ENSP00000323511 |
| ENSP00000219066 | ENSP00000324792 |
| ENSP00000219066 | ENSP00000330343 |
| ENSP00000219066 | ENSP00000334675 |
| ENSP00000219066 | ENSP00000337353 |
| ENSP00000219066 | ENSP00000339503 |
| ENSP00000219066 | ENSP00000343392 |
| ENSP00000219066 | ENSP00000343741 |
| ENSP00000219066 | ENSP00000344504 |
| ENSP00000219066 | ENSP00000347978 |
| ENSP00000219066 | ENSP00000348020 |
| ENSP00000219066 | ENSP00000348089 |
| ENSP00000219066 | ENSP00000349016 |
| ENSP00000219066 | ENSP00000351284 |
| ENSP00000219066 | ENSP00000351697 |
| ENSP00000219066 | ENSP00000352121 |
| ENSP00000219066 | ENSP00000352257 |
| ENSP00000219066 | ENSP00000354522 |
| ENSP00000219066 | ENSP00000354558 |
| ENSP00000219066 | ENSP00000358478 |
| ENSP00000219066 | ENSP00000361310 |
| ENSP00000219066 | ENSP00000364126 |
| ENSP00000219066 | ENSP00000364270 |
| ENSP00000219066 | ENSP00000368349 |
| ENSP00000219066 | ENSP00000374213 |
| ENSP00000219066 | ENSP00000400806 |
| ENSP00000219066 | ENSP00000406490 |

|                 |                 |
|-----------------|-----------------|
| ENSP00000219066 | ENSP00000406868 |
| ENSP00000219097 | ENSP00000223129 |
| ENSP00000219097 | ENSP00000234296 |
| ENSP00000219097 | ENSP00000234626 |
| ENSP00000219097 | ENSP00000254719 |
| ENSP00000219097 | ENSP00000254942 |
| ENSP00000219097 | ENSP00000257789 |
| ENSP00000219097 | ENSP00000263201 |
| ENSP00000219097 | ENSP00000264169 |
| ENSP00000219097 | ENSP00000265056 |
| ENSP00000219097 | ENSP00000265728 |
| ENSP00000219097 | ENSP00000297431 |
| ENSP00000219097 | ENSP00000352257 |
| ENSP00000219097 | ENSP00000360621 |
| ENSP00000219139 | ENSP00000247986 |
| ENSP00000219139 | ENSP00000284981 |
| ENSP00000219139 | ENSP00000367408 |
| ENSP00000219168 | ENSP00000369519 |
| ENSP00000219169 | ENSP00000219409 |
| ENSP00000219169 | ENSP00000219700 |
| ENSP00000219169 | ENSP00000226105 |
| ENSP00000219169 | ENSP00000228872 |
| ENSP00000219169 | ENSP00000231498 |
| ENSP00000219169 | ENSP00000251038 |
| ENSP00000219169 | ENSP00000259667 |
| ENSP00000219169 | ENSP00000262077 |
| ENSP00000219169 | ENSP00000264883 |
| ENSP00000219169 | ENSP00000265304 |
| ENSP00000219169 | ENSP00000278412 |
| ENSP00000219169 | ENSP00000283195 |
| ENSP00000219169 | ENSP00000290158 |
| ENSP00000219169 | ENSP00000290231 |
| ENSP00000219169 | ENSP00000296509 |
| ENSP00000219169 | ENSP00000304593 |
| ENSP00000219169 | ENSP00000305503 |
| ENSP00000219169 | ENSP00000310668 |
| ENSP00000219169 | ENSP00000311436 |
| ENSP00000219169 | ENSP00000316032 |
| ENSP00000219169 | ENSP00000330343 |
| ENSP00000219169 | ENSP00000332721 |
| ENSP00000219169 | ENSP00000343701 |
| ENSP00000219169 | ENSP00000344547 |
| ENSP00000219169 | ENSP00000351926 |
| ENSP00000219169 | ENSP00000362463 |
| ENSP00000219169 | ENSP00000365811 |
| ENSP00000219169 | ENSP00000371155 |

|                 |                 |
|-----------------|-----------------|
| ENSP00000219235 | ENSP00000229416 |
| ENSP00000219235 | ENSP00000292199 |
| ENSP00000219235 | ENSP00000294728 |
| ENSP00000219240 | ENSP00000251038 |
| ENSP00000219240 | ENSP00000264718 |
| ENSP00000219240 | ENSP00000264932 |
| ENSP00000219240 | ENSP00000282050 |
| ENSP00000219240 | ENSP00000293195 |
| ENSP00000219240 | ENSP00000354499 |
| ENSP00000219240 | ENSP00000355518 |
| ENSP00000219240 | ENSP00000359211 |
| ENSP00000219252 | ENSP00000221249 |
| ENSP00000219252 | ENSP00000221265 |
| ENSP00000219252 | ENSP00000221859 |
| ENSP00000219252 | ENSP00000222286 |
| ENSP00000219252 | ENSP00000222567 |
| ENSP00000219252 | ENSP00000225504 |
| ENSP00000219252 | ENSP00000228136 |
| ENSP00000219252 | ENSP00000230050 |
| ENSP00000219252 | ENSP00000235090 |
| ENSP00000219252 | ENSP00000237380 |
| ENSP00000219252 | ENSP00000237455 |
| ENSP00000219252 | ENSP00000238789 |
| ENSP00000219252 | ENSP00000241600 |
| ENSP00000219252 | ENSP00000242719 |
| ENSP00000219252 | ENSP00000245539 |
| ENSP00000219252 | ENSP00000247219 |
| ENSP00000219252 | ENSP00000247843 |
| ENSP00000219252 | ENSP00000251871 |
| ENSP00000219252 | ENSP00000252115 |
| ENSP00000219252 | ENSP00000252445 |
| ENSP00000219252 | ENSP00000253107 |
| ENSP00000219252 | ENSP00000255764 |
| ENSP00000219252 | ENSP00000256257 |
| ENSP00000219252 | ENSP00000256379 |
| ENSP00000219252 | ENSP00000259605 |
| ENSP00000219252 | ENSP00000260956 |
| ENSP00000219252 | ENSP00000261168 |
| ENSP00000219252 | ENSP00000261917 |
| ENSP00000219252 | ENSP00000263390 |
| ENSP00000219252 | ENSP00000263997 |
| ENSP00000219252 | ENSP00000264399 |
| ENSP00000219252 | ENSP00000264515 |
| ENSP00000219252 | ENSP00000264718 |
| ENSP00000219252 | ENSP00000264995 |
| ENSP00000219252 | ENSP00000265073 |

|                 |                 |
|-----------------|-----------------|
| ENSP00000219252 | ENSP00000265304 |
| ENSP00000219252 | ENSP00000265717 |
| ENSP00000219252 | ENSP00000265963 |
| ENSP00000219252 | ENSP00000267064 |
| ENSP00000219252 | ENSP00000267978 |
| ENSP00000219252 | ENSP00000268661 |
| ENSP00000219252 | ENSP00000268711 |
| ENSP00000219252 | ENSP00000270625 |
| ENSP00000219252 | ENSP00000272444 |
| ENSP00000219252 | ENSP00000272645 |
| ENSP00000219252 | ENSP00000278572 |
| ENSP00000219252 | ENSP00000282884 |
| ENSP00000219252 | ENSP00000283875 |
| ENSP00000219252 | ENSP00000285398 |
| ENSP00000219252 | ENSP00000286317 |
| ENSP00000219252 | ENSP00000286835 |
| ENSP00000219252 | ENSP00000287878 |
| ENSP00000219252 | ENSP00000287936 |
| ENSP00000219252 | ENSP00000288199 |
| ENSP00000219252 | ENSP00000288985 |
| ENSP00000219252 | ENSP00000292035 |
| ENSP00000219252 | ENSP00000292363 |
| ENSP00000219252 | ENSP00000295131 |
| ENSP00000219252 | ENSP00000295321 |
| ENSP00000219252 | ENSP00000296674 |
| ENSP00000219252 | ENSP00000298746 |
| ENSP00000219252 | ENSP00000299543 |
| ENSP00000219252 | ENSP00000299767 |
| ENSP00000219252 | ENSP00000300291 |
| ENSP00000219252 | ENSP00000300648 |
| ENSP00000219252 | ENSP00000301788 |
| ENSP00000219252 | ENSP00000302478 |
| ENSP00000219252 | ENSP00000304321 |
| ENSP00000219252 | ENSP00000304593 |
| ENSP00000219252 | ENSP00000305459 |
| ENSP00000219252 | ENSP00000306123 |
| ENSP00000219252 | ENSP00000306906 |
| ENSP00000219252 | ENSP00000306983 |
| ENSP00000219252 | ENSP00000310260 |
| ENSP00000219252 | ENSP00000310723 |
| ENSP00000219252 | ENSP00000312735 |
| ENSP00000219252 | ENSP00000314311 |
| ENSP00000219252 | ENSP00000314949 |
| ENSP00000219252 | ENSP00000315950 |
| ENSP00000219252 | ENSP00000317636 |
| ENSP00000219252 | ENSP00000318604 |

|                 |                 |
|-----------------|-----------------|
| ENSP00000219252 | ENSP00000318641 |
| ENSP00000219252 | ENSP00000319104 |
| ENSP00000219252 | ENSP00000319169 |
| ENSP00000219252 | ENSP00000321636 |
| ENSP00000219252 | ENSP00000323720 |
| ENSP00000219252 | ENSP00000324122 |
| ENSP00000219252 | ENSP00000324124 |
| ENSP00000219252 | ENSP00000325677 |
| ENSP00000219252 | ENSP00000326238 |
| ENSP00000219252 | ENSP00000326767 |
| ENSP00000219252 | ENSP00000326806 |
| ENSP00000219252 | ENSP00000327889 |
| ENSP00000219252 | ENSP00000329933 |
| ENSP00000219252 | ENSP00000331111 |
| ENSP00000219252 | ENSP00000331817 |
| ENSP00000219252 | ENSP00000334675 |
| ENSP00000219252 | ENSP00000336606 |
| ENSP00000219252 | ENSP00000336790 |
| ENSP00000219252 | ENSP00000336842 |
| ENSP00000219252 | ENSP00000337340 |
| ENSP00000219252 | ENSP00000339495 |
| ENSP00000219252 | ENSP00000339933 |
| ENSP00000219252 | ENSP00000340796 |
| ENSP00000219252 | ENSP00000340823 |
| ENSP00000219252 | ENSP00000342121 |
| ENSP00000219252 | ENSP00000342300 |
| ENSP00000219252 | ENSP00000342889 |
| ENSP00000219252 | ENSP00000345096 |
| ENSP00000219252 | ENSP00000345530 |
| ENSP00000219252 | ENSP00000346022 |
| ENSP00000219252 | ENSP00000346067 |
| ENSP00000219252 | ENSP00000347978 |
| ENSP00000219252 | ENSP00000348089 |
| ENSP00000219252 | ENSP00000348168 |
| ENSP00000219252 | ENSP00000350967 |
| ENSP00000219252 | ENSP00000353655 |
| ENSP00000219252 | ENSP00000354775 |
| ENSP00000219252 | ENSP00000355013 |
| ENSP00000219252 | ENSP00000356146 |
| ENSP00000219252 | ENSP00000358497 |
| ENSP00000219252 | ENSP00000358563 |
| ENSP00000219252 | ENSP00000359531 |
| ENSP00000219252 | ENSP00000361084 |
| ENSP00000219252 | ENSP00000361982 |
| ENSP00000219252 | ENSP00000362900 |
| ENSP00000219252 | ENSP00000363018 |



|                 |                 |
|-----------------|-----------------|
| ENSP00000219252 | ENSP00000363676 |
| ENSP00000219252 | ENSP00000363779 |
| ENSP00000219252 | ENSP00000366135 |
| ENSP00000219252 | ENSP00000366828 |
| ENSP00000219252 | ENSP00000368927 |
| ENSP00000219252 | ENSP00000369695 |
| ENSP00000219252 | ENSP00000370589 |
| ENSP00000219252 | ENSP00000371800 |
| ENSP00000219252 | ENSP00000372335 |
| ENSP00000219252 | ENSP00000377969 |
| ENSP00000219252 | ENSP00000378529 |
| ENSP00000219252 | ENSP00000379566 |
| ENSP00000219252 | ENSP00000379933 |
| ENSP00000219252 | ENSP00000380271 |
| ENSP00000219252 | ENSP00000381064 |
| ENSP00000219252 | ENSP00000383503 |
| ENSP00000219252 | ENSP00000385722 |
| ENSP00000219252 | ENSP00000386759 |
| ENSP00000219252 | ENSP00000389103 |
| ENSP00000219252 | ENSP00000396452 |
| ENSP00000219252 | ENSP00000397598 |
| ENSP00000219252 | ENSP00000397636 |
| ENSP00000219252 | ENSP00000403852 |
| ENSP00000219252 | ENSP00000405636 |
| ENSP00000219252 | ENSP00000410530 |
| ENSP00000219252 | ENSP00000410954 |
| ENSP00000219252 | ENSP00000414110 |
| ENSP00000219252 | ENSP00000414237 |
| ENSP00000219252 | ENSP00000416599 |
| ENSP00000219281 | ENSP00000341551 |
| ENSP00000219313 | ENSP00000219431 |
| ENSP00000219313 | ENSP00000222308 |
| ENSP00000219313 | ENSP00000222553 |
| ENSP00000219313 | ENSP00000225430 |
| ENSP00000219313 | ENSP00000231449 |
| ENSP00000219313 | ENSP00000231487 |
| ENSP00000219313 | ENSP00000237596 |
| ENSP00000219313 | ENSP00000248450 |
| ENSP00000219313 | ENSP00000248566 |
| ENSP00000219313 | ENSP00000250092 |
| ENSP00000219313 | ENSP00000251038 |
| ENSP00000219313 | ENSP00000253003 |
| ENSP00000219313 | ENSP00000256216 |
| ENSP00000219313 | ENSP00000256442 |
| ENSP00000219313 | ENSP00000259457 |
| ENSP00000219313 | ENSP00000261601 |

|                 |                 |
|-----------------|-----------------|
| ENSP00000219313 | ENSP00000261712 |
| ENSP00000219313 | ENSP00000262193 |
| ENSP00000219313 | ENSP00000262850 |
| ENSP00000219313 | ENSP00000264639 |
| ENSP00000219313 | ENSP00000265388 |
| ENSP00000219313 | ENSP00000265849 |
| ENSP00000219313 | ENSP00000280701 |
| ENSP00000219313 | ENSP00000284202 |
| ENSP00000219313 | ENSP00000289528 |
| ENSP00000219313 | ENSP00000290541 |
| ENSP00000219313 | ENSP00000295901 |
| ENSP00000219313 | ENSP00000296509 |
| ENSP00000219313 | ENSP00000296543 |
| ENSP00000219313 | ENSP00000298852 |
| ENSP00000219313 | ENSP00000309474 |
| ENSP00000219313 | ENSP00000310129 |
| ENSP00000219313 | ENSP00000311665 |
| ENSP00000219313 | ENSP00000317334 |
| ENSP00000219313 | ENSP00000325448 |
| ENSP00000219313 | ENSP00000331310 |
| ENSP00000219313 | ENSP00000336606 |
| ENSP00000219313 | ENSP00000336702 |
| ENSP00000219313 | ENSP00000337405 |
| ENSP00000219313 | ENSP00000339095 |
| ENSP00000219313 | ENSP00000341243 |
| ENSP00000219313 | ENSP00000347184 |
| ENSP00000219313 | ENSP00000348442 |
| ENSP00000219313 | ENSP00000350708 |
| ENSP00000219313 | ENSP00000353098 |
| ENSP00000219313 | ENSP00000354673 |
| ENSP00000219313 | ENSP00000359518 |
| ENSP00000219313 | ENSP00000360821 |
| ENSP00000219313 | ENSP00000361699 |
| ENSP00000219313 | ENSP00000362166 |
| ENSP00000219313 | ENSP00000362334 |
| ENSP00000219313 | ENSP00000364119 |
| ENSP00000219313 | ENSP00000379607 |
| ENSP00000219313 | ENSP00000381891 |
| ENSP00000219313 | ENSP00000384211 |
| ENSP00000219313 | ENSP00000386212 |
| ENSP00000219313 | ENSP00000396937 |
| ENSP00000219313 | ENSP00000401508 |
| ENSP00000219313 | ENSP00000402084 |
| ENSP00000219313 | ENSP00000406490 |
| ENSP00000219313 | ENSP00000417748 |
| ENSP00000219368 | ENSP00000220584 |

|                 |                 |
|-----------------|-----------------|
| ENSP00000219368 | ENSP00000220853 |
| ENSP00000219368 | ENSP00000228027 |
| ENSP00000219368 | ENSP00000244051 |
| ENSP00000219368 | ENSP00000245222 |
| ENSP00000219368 | ENSP00000247225 |
| ENSP00000219368 | ENSP00000251363 |
| ENSP00000219368 | ENSP00000256319 |
| ENSP00000219368 | ENSP00000258052 |
| ENSP00000219368 | ENSP00000261507 |
| ENSP00000219368 | ENSP00000262265 |
| ENSP00000219368 | ENSP00000262315 |
| ENSP00000219368 | ENSP00000262519 |
| ENSP00000219368 | ENSP00000263702 |
| ENSP00000219368 | ENSP00000264027 |
| ENSP00000219368 | ENSP00000265351 |
| ENSP00000219368 | ENSP00000265896 |
| ENSP00000219368 | ENSP00000267197 |
| ENSP00000219368 | ENSP00000270538 |
| ENSP00000219368 | ENSP00000271375 |
| ENSP00000219368 | ENSP00000272163 |
| ENSP00000219368 | ENSP00000277010 |
| ENSP00000219368 | ENSP00000280350 |
| ENSP00000219368 | ENSP00000285949 |
| ENSP00000219368 | ENSP00000286317 |
| ENSP00000219368 | ENSP00000287936 |
| ENSP00000219368 | ENSP00000288266 |
| ENSP00000219368 | ENSP00000292535 |
| ENSP00000219368 | ENSP00000298292 |
| ENSP00000219368 | ENSP00000302790 |
| ENSP00000219368 | ENSP00000310721 |
| ENSP00000219368 | ENSP00000312458 |
| ENSP00000219368 | ENSP00000315693 |
| ENSP00000219368 | ENSP00000317334 |
| ENSP00000219368 | ENSP00000318115 |
| ENSP00000219368 | ENSP00000327716 |
| ENSP00000219368 | ENSP00000331479 |
| ENSP00000219368 | ENSP00000331487 |
| ENSP00000219368 | ENSP00000332258 |
| ENSP00000219368 | ENSP00000333946 |
| ENSP00000219368 | ENSP00000336724 |
| ENSP00000219368 | ENSP00000341159 |
| ENSP00000219368 | ENSP00000341551 |
| ENSP00000219368 | ENSP00000341662 |
| ENSP00000219368 | ENSP00000342609 |
| ENSP00000219368 | ENSP00000346733 |
| ENSP00000219368 | ENSP00000348762 |

|                 |                 |
|-----------------|-----------------|
| ENSP00000219368 | ENSP00000350012 |
| ENSP00000219368 | ENSP00000350297 |
| ENSP00000219368 | ENSP00000351520 |
| ENSP00000219368 | ENSP00000354519 |
| ENSP00000219368 | ENSP00000355517 |
| ENSP00000219368 | ENSP00000356591 |
| ENSP00000219368 | ENSP00000358695 |
| ENSP00000219368 | ENSP00000358831 |
| ENSP00000219368 | ENSP00000359000 |
| ENSP00000219368 | ENSP00000359380 |
| ENSP00000219368 | ENSP00000365766 |
| ENSP00000219368 | ENSP00000371236 |
| ENSP00000219368 | ENSP00000372720 |
| ENSP00000219368 | ENSP00000379430 |
| ENSP00000219368 | ENSP00000381293 |
| ENSP00000219368 | ENSP00000381567 |
| ENSP00000219368 | ENSP00000386284 |
| ENSP00000219368 | ENSP00000389277 |
| ENSP00000219368 | ENSP00000397441 |
| ENSP00000219368 | ENSP00000402240 |
| ENSP00000219368 | ENSP00000412922 |
| ENSP00000219400 | ENSP00000251038 |
| ENSP00000219400 | ENSP00000297151 |
| ENSP00000219400 | ENSP00000418348 |
| ENSP00000219409 | ENSP00000280605 |
| ENSP00000219409 | ENSP00000368438 |
| ENSP00000219431 | ENSP00000233893 |
| ENSP00000219431 | ENSP00000245206 |
| ENSP00000219431 | ENSP00000256594 |
| ENSP00000219431 | ENSP00000265881 |
| ENSP00000219431 | ENSP00000290299 |
| ENSP00000219431 | ENSP00000300086 |
| ENSP00000219431 | ENSP00000300291 |
| ENSP00000219431 | ENSP00000337127 |
| ENSP00000219431 | ENSP00000350708 |
| ENSP00000219431 | ENSP00000356652 |
| ENSP00000219431 | ENSP00000379339 |
| ENSP00000219431 | ENSP00000393393 |
| ENSP00000219439 | ENSP00000256383 |
| ENSP00000219439 | ENSP00000261875 |
| ENSP00000219439 | ENSP00000263208 |
| ENSP00000219439 | ENSP00000266126 |
| ENSP00000219439 | ENSP00000273783 |
| ENSP00000219439 | ENSP00000315925 |
| ENSP00000219439 | ENSP00000330408 |
| ENSP00000219439 | ENSP00000353575 |

|                 |                 |
|-----------------|-----------------|
| ENSP00000219439 | ENSP00000355308 |
| ENSP00000219439 | ENSP00000362869 |
| ENSP00000219439 | ENSP00000364119 |
| ENSP00000219439 | ENSP00000370607 |
| ENSP00000219439 | ENSP00000394869 |
| ENSP00000219454 | ENSP00000352271 |
| ENSP00000219473 | ENSP00000224073 |
| ENSP00000219473 | ENSP00000225504 |
| ENSP00000219473 | ENSP00000225728 |
| ENSP00000219473 | ENSP00000226796 |
| ENSP00000219473 | ENSP00000228916 |
| ENSP00000219473 | ENSP00000234170 |
| ENSP00000219473 | ENSP00000234827 |
| ENSP00000219473 | ENSP00000236051 |
| ENSP00000219473 | ENSP00000240922 |
| ENSP00000219473 | ENSP00000243563 |
| ENSP00000219473 | ENSP00000245838 |
| ENSP00000219473 | ENSP00000247219 |
| ENSP00000219473 | ENSP00000247843 |
| ENSP00000219473 | ENSP00000248566 |
| ENSP00000219473 | ENSP00000251871 |
| ENSP00000219473 | ENSP00000254193 |
| ENSP00000219473 | ENSP00000254940 |
| ENSP00000219473 | ENSP00000256379 |
| ENSP00000219473 | ENSP00000256442 |
| ENSP00000219473 | ENSP00000257829 |
| ENSP00000219473 | ENSP00000261758 |
| ENSP00000219473 | ENSP00000261845 |
| ENSP00000219473 | ENSP00000262455 |
| ENSP00000219473 | ENSP00000262518 |
| ENSP00000219473 | ENSP00000262544 |
| ENSP00000219473 | ENSP00000262803 |
| ENSP00000219473 | ENSP00000262812 |
| ENSP00000219473 | ENSP00000262966 |
| ENSP00000219473 | ENSP00000263205 |
| ENSP00000219473 | ENSP00000263390 |
| ENSP00000219473 | ENSP00000263657 |
| ENSP00000219473 | ENSP00000263710 |
| ENSP00000219473 | ENSP00000264028 |
| ENSP00000219473 | ENSP00000264160 |
| ENSP00000219473 | ENSP00000264515 |
| ENSP00000219473 | ENSP00000264951 |
| ENSP00000219473 | ENSP00000265073 |
| ENSP00000219473 | ENSP00000265175 |
| ENSP00000219473 | ENSP00000265857 |
| ENSP00000219473 | ENSP00000267064 |

|                 |                 |
|-----------------|-----------------|
| ENSP00000219473 | ENSP00000268482 |
| ENSP00000219473 | ENSP00000273398 |
| ENSP00000219473 | ENSP00000278572 |
| ENSP00000219473 | ENSP00000281928 |
| ENSP00000219473 | ENSP00000282007 |
| ENSP00000219473 | ENSP00000282441 |
| ENSP00000219473 | ENSP00000283882 |
| ENSP00000219473 | ENSP00000284719 |
| ENSP00000219473 | ENSP00000285021 |
| ENSP00000219473 | ENSP00000286317 |
| ENSP00000219473 | ENSP00000287878 |
| ENSP00000219473 | ENSP00000288985 |
| ENSP00000219473 | ENSP00000290663 |
| ENSP00000219473 | ENSP00000293406 |
| ENSP00000219473 | ENSP00000293777 |
| ENSP00000219473 | ENSP00000294119 |
| ENSP00000219473 | ENSP00000296328 |
| ENSP00000219473 | ENSP00000296577 |
| ENSP00000219473 | ENSP00000296755 |
| ENSP00000219473 | ENSP00000298532 |
| ENSP00000219473 | ENSP00000298746 |
| ENSP00000219473 | ENSP00000299138 |
| ENSP00000219473 | ENSP00000300231 |
| ENSP00000219473 | ENSP00000304593 |
| ENSP00000219473 | ENSP00000305682 |
| ENSP00000219473 | ENSP00000306124 |
| ENSP00000219473 | ENSP00000307684 |
| ENSP00000219473 | ENSP00000307863 |
| ENSP00000219473 | ENSP00000308944 |
| ENSP00000219473 | ENSP00000310129 |
| ENSP00000219473 | ENSP00000311005 |
| ENSP00000219473 | ENSP00000312066 |
| ENSP00000219473 | ENSP00000312735 |
| ENSP00000219473 | ENSP00000314615 |
| ENSP00000219473 | ENSP00000314949 |
| ENSP00000219473 | ENSP00000316879 |
| ENSP00000219473 | ENSP00000317992 |
| ENSP00000219473 | ENSP00000320309 |
| ENSP00000219473 | ENSP00000320949 |
| ENSP00000219473 | ENSP00000322608 |
| ENSP00000219473 | ENSP00000323720 |
| ENSP00000219473 | ENSP00000324560 |
| ENSP00000219473 | ENSP00000325448 |
| ENSP00000219473 | ENSP00000325612 |
| ENSP00000219473 | ENSP00000326128 |
| ENSP00000219473 | ENSP00000326767 |

|                 |                 |
|-----------------|-----------------|
| ENSP00000219473 | ENSP00000326806 |
| ENSP00000219473 | ENSP00000327179 |
| ENSP00000219473 | ENSP00000327716 |
| ENSP00000219473 | ENSP00000329419 |
| ENSP00000219473 | ENSP00000331487 |
| ENSP00000219473 | ENSP00000331897 |
| ENSP00000219473 | ENSP00000331907 |
| ENSP00000219473 | ENSP00000332103 |
| ENSP00000219473 | ENSP00000334675 |
| ENSP00000219473 | ENSP00000336606 |
| ENSP00000219473 | ENSP00000336842 |
| ENSP00000219473 | ENSP00000338788 |
| ENSP00000219473 | ENSP00000338862 |
| ENSP00000219473 | ENSP00000343535 |
| ENSP00000219473 | ENSP00000343557 |
| ENSP00000219473 | ENSP00000345530 |
| ENSP00000219473 | ENSP00000347883 |
| ENSP00000219473 | ENSP00000348089 |
| ENSP00000219473 | ENSP00000348442 |
| ENSP00000219473 | ENSP00000348577 |
| ENSP00000219473 | ENSP00000350708 |
| ENSP00000219473 | ENSP00000352738 |
| ENSP00000219473 | ENSP00000353741 |
| ENSP00000219473 | ENSP00000353998 |
| ENSP00000219473 | ENSP00000354061 |
| ENSP00000219473 | ENSP00000354125 |
| ENSP00000219473 | ENSP00000354558 |
| ENSP00000219473 | ENSP00000354927 |
| ENSP00000219473 | ENSP00000355051 |
| ENSP00000219473 | ENSP00000355205 |
| ENSP00000219473 | ENSP00000355231 |
| ENSP00000219473 | ENSP00000355890 |
| ENSP00000219473 | ENSP00000356520 |
| ENSP00000219473 | ENSP00000357047 |
| ENSP00000219473 | ENSP00000357887 |
| ENSP00000219473 | ENSP00000357907 |
| ENSP00000219473 | ENSP00000358081 |
| ENSP00000219473 | ENSP00000358140 |
| ENSP00000219473 | ENSP00000358478 |
| ENSP00000219473 | ENSP00000358563 |
| ENSP00000219473 | ENSP00000359345 |
| ENSP00000219473 | ENSP00000359552 |
| ENSP00000219473 | ENSP00000360515 |
| ENSP00000219473 | ENSP00000360532 |
| ENSP00000219473 | ENSP00000361465 |
| ENSP00000219473 | ENSP00000361577 |

|                 |                 |
|-----------------|-----------------|
| ENSP00000219473 | ENSP00000361699 |
| ENSP00000219473 | ENSP00000362306 |
| ENSP00000219473 | ENSP00000362936 |
| ENSP00000219473 | ENSP00000362948 |
| ENSP00000219473 | ENSP00000365005 |
| ENSP00000219473 | ENSP00000366607 |
| ENSP00000219473 | ENSP00000366974 |
| ENSP00000219473 | ENSP00000367029 |
| ENSP00000219473 | ENSP00000367498 |
| ENSP00000219473 | ENSP00000374213 |
| ENSP00000219473 | ENSP00000376268 |
| ENSP00000219473 | ENSP00000377655 |
| ENSP00000219473 | ENSP00000377969 |
| ENSP00000219473 | ENSP00000379228 |
| ENSP00000219473 | ENSP00000380129 |
| ENSP00000219473 | ENSP00000380460 |
| ENSP00000219473 | ENSP00000380982 |
| ENSP00000219473 | ENSP00000382423 |
| ENSP00000219473 | ENSP00000384048 |
| ENSP00000219473 | ENSP00000384211 |
| ENSP00000219473 | ENSP00000388872 |
| ENSP00000219473 | ENSP00000391774 |
| ENSP00000219473 | ENSP00000392617 |
| ENSP00000219473 | ENSP00000396937 |
| ENSP00000219473 | ENSP00000402527 |
| ENSP00000219473 | ENSP00000406293 |
| ENSP00000219473 | ENSP00000412566 |
| ENSP00000219473 | ENSP00000417281 |
| ENSP00000219473 | ENSP00000418734 |
| ENSP00000219476 | ENSP00000220849 |
| ENSP00000219476 | ENSP00000223369 |
| ENSP00000219476 | ENSP00000227507 |
| ENSP00000219476 | ENSP00000228872 |
| ENSP00000219476 | ENSP00000246166 |
| ENSP00000219476 | ENSP00000247970 |
| ENSP00000219476 | ENSP00000248673 |
| ENSP00000219476 | ENSP00000255465 |
| ENSP00000219476 | ENSP00000262039 |
| ENSP00000219476 | ENSP00000262320 |
| ENSP00000219476 | ENSP00000262643 |
| ENSP00000219476 | ENSP00000264335 |
| ENSP00000219476 | ENSP00000265970 |
| ENSP00000219476 | ENSP00000274255 |
| ENSP00000219476 | ENSP00000278616 |
| ENSP00000219476 | ENSP00000281043 |
| ENSP00000219476 | ENSP00000282388 |



|                 |                 |
|-----------------|-----------------|
| ENSP00000219476 | ENSP00000297316 |
| ENSP00000219476 | ENSP00000298552 |
| ENSP00000219476 | ENSP00000298630 |
| ENSP00000219476 | ENSP00000303423 |
| ENSP00000219476 | ENSP00000306100 |
| ENSP00000219476 | ENSP00000313034 |
| ENSP00000219476 | ENSP00000313420 |
| ENSP00000219476 | ENSP00000330098 |
| ENSP00000219476 | ENSP00000331152 |
| ENSP00000219476 | ENSP00000339191 |
| ENSP00000219476 | ENSP00000341189 |
| ENSP00000219476 | ENSP00000343741 |
| ENSP00000219476 | ENSP00000347733 |
| ENSP00000219476 | ENSP00000348813 |
| ENSP00000219476 | ENSP00000349078 |
| ENSP00000219476 | ENSP00000350785 |
| ENSP00000219476 | ENSP00000351490 |
| ENSP00000219476 | ENSP00000352121 |
| ENSP00000219476 | ENSP00000353698 |
| ENSP00000219476 | ENSP00000354558 |
| ENSP00000219476 | ENSP00000359567 |
| ENSP00000219476 | ENSP00000381045 |
| ENSP00000219476 | ENSP00000402515 |
| ENSP00000219476 | ENSP00000408020 |
| ENSP00000219479 | ENSP00000241052 |
| ENSP00000219479 | ENSP00000242576 |
| ENSP00000219479 | ENSP00000252487 |
| ENSP00000219479 | ENSP00000254942 |
| ENSP00000219479 | ENSP00000301585 |
| ENSP00000219479 | ENSP00000304908 |
| ENSP00000219479 | ENSP00000312735 |
| ENSP00000219479 | ENSP00000368438 |
| ENSP00000219479 | ENSP00000369456 |
| ENSP00000219479 | ENSP00000369757 |
| ENSP00000219548 | ENSP00000223029 |
| ENSP00000219548 | ENSP00000230882 |
| ENSP00000219548 | ENSP00000242057 |
| ENSP00000219548 | ENSP00000244769 |
| ENSP00000219548 | ENSP00000245816 |
| ENSP00000219548 | ENSP00000246062 |
| ENSP00000219548 | ENSP00000254942 |
| ENSP00000219548 | ENSP00000255631 |
| ENSP00000219548 | ENSP00000260818 |
| ENSP00000219548 | ENSP00000262375 |
| ENSP00000219548 | ENSP00000263202 |
| ENSP00000219548 | ENSP00000263734 |

|                 |                 |
|-----------------|-----------------|
| ENSP00000219548 | ENSP00000266000 |
| ENSP00000219548 | ENSP00000267415 |
| ENSP00000219548 | ENSP00000272638 |
| ENSP00000219548 | ENSP00000274255 |
| ENSP00000219548 | ENSP00000276603 |
| ENSP00000219548 | ENSP00000284981 |
| ENSP00000219548 | ENSP00000292211 |
| ENSP00000219548 | ENSP00000294339 |
| ENSP00000219548 | ENSP00000296474 |
| ENSP00000219548 | ENSP00000296509 |
| ENSP00000219548 | ENSP00000298910 |
| ENSP00000219548 | ENSP00000303507 |
| ENSP00000219548 | ENSP00000306449 |
| ENSP00000219548 | ENSP00000309474 |
| ENSP00000219548 | ENSP00000309572 |
| ENSP00000219548 | ENSP00000319788 |
| ENSP00000219548 | ENSP00000320758 |
| ENSP00000219548 | ENSP00000321617 |
| ENSP00000219548 | ENSP00000323275 |
| ENSP00000219548 | ENSP00000326391 |
| ENSP00000219548 | ENSP00000326813 |
| ENSP00000219548 | ENSP00000331057 |
| ENSP00000219548 | ENSP00000331201 |
| ENSP00000219548 | ENSP00000331487 |
| ENSP00000219548 | ENSP00000334061 |
| ENSP00000219548 | ENSP00000337088 |
| ENSP00000219548 | ENSP00000338345 |
| ENSP00000219548 | ENSP00000338814 |
| ENSP00000219548 | ENSP00000340019 |
| ENSP00000219548 | ENSP00000340278 |
| ENSP00000219548 | ENSP00000340305 |
| ENSP00000219548 | ENSP00000340820 |
| ENSP00000219548 | ENSP00000341551 |
| ENSP00000219548 | ENSP00000344874 |
| ENSP00000219548 | ENSP00000345464 |
| ENSP00000219548 | ENSP00000346240 |
| ENSP00000219548 | ENSP00000350249 |
| ENSP00000219548 | ENSP00000351908 |
| ENSP00000219548 | ENSP00000352514 |
| ENSP00000219548 | ENSP00000355865 |
| ENSP00000219548 | ENSP00000356489 |
| ENSP00000219548 | ENSP00000359727 |
| ENSP00000219548 | ENSP00000360644 |
| ENSP00000219548 | ENSP00000363089 |
| ENSP00000219548 | ENSP00000377496 |
| ENSP00000219548 | ENSP00000380019 |

|                 |                 |
|-----------------|-----------------|
| ENSP00000219548 | ENSP00000380460 |
| ENSP00000219551 | ENSP00000265354 |
| ENSP00000219551 | ENSP00000267101 |
| ENSP00000219551 | ENSP00000271555 |
| ENSP00000219551 | ENSP00000277541 |
| ENSP00000219551 | ENSP00000302216 |
| ENSP00000219551 | ENSP00000304676 |
| ENSP00000219551 | ENSP00000309871 |
| ENSP00000219551 | ENSP00000343785 |
| ENSP00000219551 | ENSP00000363055 |
| ENSP00000219551 | ENSP00000367972 |
| ENSP00000219551 | ENSP00000369042 |
| ENSP00000219596 | ENSP00000297135 |
| ENSP00000219599 | ENSP00000223127 |
| ENSP00000219599 | ENSP00000276603 |
| ENSP00000219599 | ENSP00000351575 |
| ENSP00000219599 | ENSP00000376758 |
| ENSP00000219689 | ENSP00000291688 |
| ENSP00000219689 | ENSP00000321449 |
| ENSP00000219689 | ENSP00000368438 |
| ENSP00000219689 | ENSP00000380460 |
| ENSP00000219700 | ENSP00000229416 |
| ENSP00000219700 | ENSP00000241052 |
| ENSP00000219700 | ENSP00000251038 |
| ENSP00000219700 | ENSP00000265304 |
| ENSP00000219700 | ENSP00000284981 |
| ENSP00000219700 | ENSP00000286627 |
| ENSP00000219700 | ENSP00000313921 |
| ENSP00000219700 | ENSP00000333433 |
| ENSP00000219700 | ENSP00000381863 |
| ENSP00000219789 | ENSP00000227471 |
| ENSP00000219789 | ENSP00000251038 |
| ENSP00000219789 | ENSP00000256854 |
| ENSP00000219789 | ENSP00000260257 |
| ENSP00000219789 | ENSP00000261386 |
| ENSP00000219789 | ENSP00000264161 |
| ENSP00000219789 | ENSP00000264167 |
| ENSP00000219789 | ENSP00000266095 |
| ENSP00000219789 | ENSP00000274680 |
| ENSP00000219789 | ENSP00000281828 |
| ENSP00000219789 | ENSP00000288937 |
| ENSP00000219789 | ENSP00000292199 |
| ENSP00000219789 | ENSP00000311505 |
| ENSP00000219789 | ENSP00000314440 |
| ENSP00000219789 | ENSP00000315693 |
| ENSP00000219789 | ENSP00000320309 |

|                 |                 |
|-----------------|-----------------|
| ENSP00000219789 | ENSP00000322316 |
| ENSP00000219789 | ENSP00000340093 |
| ENSP00000219789 | ENSP00000345530 |
| ENSP00000219789 | ENSP00000346037 |
| ENSP00000219789 | ENSP00000353826 |
| ENSP00000219789 | ENSP00000357998 |
| ENSP00000219789 | ENSP00000362306 |
| ENSP00000219789 | ENSP00000367498 |
| ENSP00000219789 | ENSP00000370372 |
| ENSP00000219789 | ENSP00000379228 |
| ENSP00000219789 | ENSP00000379568 |
| ENSP00000219789 | ENSP00000381891 |
| ENSP00000219905 | ENSP00000254029 |
| ENSP00000219905 | ENSP00000262904 |
| ENSP00000219905 | ENSP00000269397 |
| ENSP00000219905 | ENSP00000308750 |
| ENSP00000219905 | ENSP00000351490 |
| ENSP00000219905 | ENSP00000358862 |
| ENSP00000219905 | ENSP00000368686 |
| ENSP00000219905 | ENSP00000419494 |
| ENSP00000220058 | ENSP00000222286 |
| ENSP00000220058 | ENSP00000229214 |
| ENSP00000220058 | ENSP00000261211 |
| ENSP00000220058 | ENSP00000263629 |
| ENSP00000220058 | ENSP00000334188 |
| ENSP00000220058 | ENSP00000388872 |
| ENSP00000220062 | ENSP00000340954 |
| ENSP00000220062 | ENSP00000341551 |
| ENSP00000220478 | ENSP00000327145 |
| ENSP00000220496 | ENSP00000222969 |
| ENSP00000220496 | ENSP00000227524 |
| ENSP00000220496 | ENSP00000254193 |
| ENSP00000220496 | ENSP00000258415 |
| ENSP00000220496 | ENSP00000261531 |
| ENSP00000220496 | ENSP00000270538 |
| ENSP00000220496 | ENSP00000286621 |
| ENSP00000220496 | ENSP00000294053 |
| ENSP00000220496 | ENSP00000301764 |
| ENSP00000220496 | ENSP00000304350 |
| ENSP00000220496 | ENSP00000305790 |
| ENSP00000220496 | ENSP00000307525 |
| ENSP00000220496 | ENSP00000314499 |
| ENSP00000220496 | ENSP00000335321 |
| ENSP00000220496 | ENSP00000340879 |
| ENSP00000220496 | ENSP00000342374 |
| ENSP00000220496 | ENSP00000351137 |

|                 |                 |
|-----------------|-----------------|
| ENSP00000220496 | ENSP00000357998 |
| ENSP00000220496 | ENSP00000360532 |
| ENSP00000220496 | ENSP00000362110 |
| ENSP00000220496 | ENSP00000366557 |
| ENSP00000220496 | ENSP00000368565 |
| ENSP00000220509 | ENSP00000231368 |
| ENSP00000220509 | ENSP00000249923 |
| ENSP00000220509 | ENSP00000251038 |
| ENSP00000220509 | ENSP00000253083 |
| ENSP00000220509 | ENSP00000253699 |
| ENSP00000220509 | ENSP00000255465 |
| ENSP00000220509 | ENSP00000258301 |
| ENSP00000220509 | ENSP00000262215 |
| ENSP00000220509 | ENSP00000263688 |
| ENSP00000220509 | ENSP00000265056 |
| ENSP00000220509 | ENSP00000273398 |
| ENSP00000220509 | ENSP00000300245 |
| ENSP00000220509 | ENSP00000305255 |
| ENSP00000220509 | ENSP00000309457 |
| ENSP00000220509 | ENSP00000311200 |
| ENSP00000220509 | ENSP00000312870 |
| ENSP00000220509 | ENSP00000313420 |
| ENSP00000220509 | ENSP00000326534 |
| ENSP00000220509 | ENSP00000344055 |
| ENSP00000220509 | ENSP00000348455 |
| ENSP00000220509 | ENSP00000354558 |
| ENSP00000220509 | ENSP00000360252 |
| ENSP00000220509 | ENSP00000360268 |
| ENSP00000220509 | ENSP00000367265 |
| ENSP00000220509 | ENSP00000367406 |
| ENSP00000220509 | ENSP00000369810 |
| ENSP00000220509 | ENSP00000390783 |
| ENSP00000220509 | ENSP00000402515 |
| ENSP00000220509 | ENSP00000418661 |
| ENSP00000220514 | ENSP00000266732 |
| ENSP00000220514 | ENSP00000286186 |
| ENSP00000220514 | ENSP00000288602 |
| ENSP00000220514 | ENSP00000323880 |
| ENSP00000220514 | ENSP00000356595 |
| ENSP00000220514 | ENSP00000357051 |
| ENSP00000220531 | ENSP00000240079 |
| ENSP00000220531 | ENSP00000261597 |
| ENSP00000220531 | ENSP00000281172 |
| ENSP00000220531 | ENSP00000285116 |
| ENSP00000220531 | ENSP00000316109 |
| ENSP00000220531 | ENSP00000318128 |

|                 |                 |
|-----------------|-----------------|
| ENSP00000220531 | ENSP00000336856 |
| ENSP00000220531 | ENSP00000341680 |
| ENSP00000220531 | ENSP00000353564 |
| ENSP00000220531 | ENSP00000357674 |
| ENSP00000220531 | ENSP00000361048 |
| ENSP00000220531 | ENSP00000365401 |
| ENSP00000220531 | ENSP00000380598 |
| ENSP00000220562 | ENSP00000244007 |
| ENSP00000220562 | ENSP00000300574 |
| ENSP00000220584 | ENSP00000231487 |
| ENSP00000220584 | ENSP00000254521 |
| ENSP00000220584 | ENSP00000256319 |
| ENSP00000220584 | ENSP00000258415 |
| ENSP00000220584 | ENSP00000260129 |
| ENSP00000220584 | ENSP00000261507 |
| ENSP00000220584 | ENSP00000264027 |
| ENSP00000220584 | ENSP00000272163 |
| ENSP00000220584 | ENSP00000285949 |
| ENSP00000220584 | ENSP00000303992 |
| ENSP00000220584 | ENSP00000310721 |
| ENSP00000220584 | ENSP00000315626 |
| ENSP00000220584 | ENSP00000320604 |
| ENSP00000220584 | ENSP00000325425 |
| ENSP00000220584 | ENSP00000325690 |
| ENSP00000220584 | ENSP00000330812 |
| ENSP00000220584 | ENSP00000341662 |
| ENSP00000220584 | ENSP00000343657 |
| ENSP00000220584 | ENSP00000345972 |
| ENSP00000220584 | ENSP00000348380 |
| ENSP00000220584 | ENSP00000358605 |
| ENSP00000220584 | ENSP00000360918 |
| ENSP00000220584 | ENSP00000367079 |
| ENSP00000220584 | ENSP00000387019 |
| ENSP00000220597 | ENSP00000274376 |
| ENSP00000220597 | ENSP00000340944 |
| ENSP00000220597 | ENSP00000364898 |
| ENSP00000220616 | ENSP00000263816 |
| ENSP00000220616 | ENSP00000286091 |
| ENSP00000220616 | ENSP00000299767 |
| ENSP00000220659 | ENSP00000221232 |
| ENSP00000220659 | ENSP00000222284 |
| ENSP00000220659 | ENSP00000225728 |
| ENSP00000220659 | ENSP00000228955 |
| ENSP00000220659 | ENSP00000244763 |
| ENSP00000220659 | ENSP00000247970 |
| ENSP00000220659 | ENSP00000248553 |

|                 |                 |
|-----------------|-----------------|
| ENSP00000220659 | ENSP00000253003 |
| ENSP00000220659 | ENSP00000255305 |
| ENSP00000220659 | ENSP00000262133 |
| ENSP00000220659 | ENSP00000262982 |
| ENSP00000220659 | ENSP00000263974 |
| ENSP00000220659 | ENSP00000265073 |
| ENSP00000220659 | ENSP00000265388 |
| ENSP00000220659 | ENSP00000266263 |
| ENSP00000220659 | ENSP00000272645 |
| ENSP00000220659 | ENSP00000276072 |
| ENSP00000220659 | ENSP00000282003 |
| ENSP00000220659 | ENSP00000285398 |
| ENSP00000220659 | ENSP00000287295 |
| ENSP00000220659 | ENSP00000291386 |
| ENSP00000220659 | ENSP00000293195 |
| ENSP00000220659 | ENSP00000298281 |
| ENSP00000220659 | ENSP00000298532 |
| ENSP00000220659 | ENSP00000299424 |
| ENSP00000220659 | ENSP00000301788 |
| ENSP00000220659 | ENSP00000302790 |
| ENSP00000220659 | ENSP00000304704 |
| ENSP00000220659 | ENSP00000308944 |
| ENSP00000220659 | ENSP00000310842 |
| ENSP00000220659 | ENSP00000312735 |
| ENSP00000220659 | ENSP00000313953 |
| ENSP00000220659 | ENSP00000315791 |
| ENSP00000220659 | ENSP00000317992 |
| ENSP00000220659 | ENSP00000318604 |
| ENSP00000220659 | ENSP00000323720 |
| ENSP00000220659 | ENSP00000324124 |
| ENSP00000220659 | ENSP00000325002 |
| ENSP00000220659 | ENSP00000337405 |
| ENSP00000220659 | ENSP00000342889 |
| ENSP00000220659 | ENSP00000346453 |
| ENSP00000220659 | ENSP00000347345 |
| ENSP00000220659 | ENSP00000348010 |
| ENSP00000220659 | ENSP00000351575 |
| ENSP00000220659 | ENSP00000354125 |
| ENSP00000220659 | ENSP00000354742 |
| ENSP00000220659 | ENSP00000356405 |
| ENSP00000220659 | ENSP00000358140 |
| ENSP00000220659 | ENSP00000358716 |
| ENSP00000220659 | ENSP00000359211 |
| ENSP00000220659 | ENSP00000359290 |
| ENSP00000220659 | ENSP00000359484 |
| ENSP00000220659 | ENSP00000360644 |

|                 |                 |
|-----------------|-----------------|
| ENSP00000220659 | ENSP00000364119 |
| ENSP00000220659 | ENSP00000364289 |
| ENSP00000220659 | ENSP00000366748 |
| ENSP00000220659 | ENSP00000370258 |
| ENSP00000220659 | ENSP00000378736 |
| ENSP00000220659 | ENSP00000379372 |
| ENSP00000220659 | ENSP00000384597 |
| ENSP00000220659 | ENSP00000386992 |
| ENSP00000220659 | ENSP00000403852 |
| ENSP00000220659 | ENSP00000417229 |
| ENSP00000220669 | ENSP00000238789 |
| ENSP00000220669 | ENSP00000248633 |
| ENSP00000220669 | ENSP00000251038 |
| ENSP00000220669 | ENSP00000253107 |
| ENSP00000220669 | ENSP00000276692 |
| ENSP00000220669 | ENSP00000306080 |
| ENSP00000220669 | ENSP00000320885 |
| ENSP00000220669 | ENSP00000331487 |
| ENSP00000220669 | ENSP00000358140 |
| ENSP00000220669 | ENSP00000363338 |
| ENSP00000220669 | ENSP00000370258 |
| ENSP00000220669 | ENSP00000384048 |
| ENSP00000220676 | ENSP00000222115 |
| ENSP00000220676 | ENSP00000227758 |
| ENSP00000220676 | ENSP00000242285 |
| ENSP00000220676 | ENSP00000256658 |
| ENSP00000220676 | ENSP00000257430 |
| ENSP00000220676 | ENSP00000271628 |
| ENSP00000220676 | ENSP00000300249 |
| ENSP00000220676 | ENSP00000301788 |
| ENSP00000220676 | ENSP00000349298 |
| ENSP00000220676 | ENSP00000350199 |
| ENSP00000220676 | ENSP00000386394 |
| ENSP00000220676 | ENSP00000393596 |
| ENSP00000220676 | ENSP00000402240 |
| ENSP00000220751 | ENSP00000227758 |
| ENSP00000220751 | ENSP00000234590 |
| ENSP00000220751 | ENSP00000252543 |
| ENSP00000220751 | ENSP00000254691 |
| ENSP00000220751 | ENSP00000259808 |
| ENSP00000220751 | ENSP00000300303 |
| ENSP00000220751 | ENSP00000300589 |
| ENSP00000220751 | ENSP00000309830 |
| ENSP00000220751 | ENSP00000311028 |
| ENSP00000220751 | ENSP00000315112 |
| ENSP00000220751 | ENSP00000335657 |



|                 |                 |
|-----------------|-----------------|
| ENSP00000220751 | ENSP00000337127 |
| ENSP00000220751 | ENSP00000341551 |
| ENSP00000220751 | ENSP00000356319 |
| ENSP00000220751 | ENSP00000358335 |
| ENSP00000220751 | ENSP00000358997 |
| ENSP00000220751 | ENSP00000363089 |
| ENSP00000220751 | ENSP00000364858 |
| ENSP00000220751 | ENSP00000368698 |
| ENSP00000220751 | ENSP00000376309 |
| ENSP00000220751 | ENSP00000401980 |
| ENSP00000220763 | ENSP00000338413 |
| ENSP00000220763 | ENSP00000367835 |
| ENSP00000220764 | ENSP00000238647 |
| ENSP00000220764 | ENSP00000264029 |
| ENSP00000220764 | ENSP00000331201 |
| ENSP00000220764 | ENSP00000344936 |
| ENSP00000220849 | ENSP00000228825 |
| ENSP00000220849 | ENSP00000229251 |
| ENSP00000220849 | ENSP00000237281 |
| ENSP00000220849 | ENSP00000248342 |
| ENSP00000220849 | ENSP00000253108 |
| ENSP00000220849 | ENSP00000253363 |
| ENSP00000220849 | ENSP00000256442 |
| ENSP00000220849 | ENSP00000259569 |
| ENSP00000220849 | ENSP00000261531 |
| ENSP00000220849 | ENSP00000261908 |
| ENSP00000220849 | ENSP00000263734 |
| ENSP00000220849 | ENSP00000265753 |
| ENSP00000220849 | ENSP00000268058 |
| ENSP00000220849 | ENSP00000271628 |
| ENSP00000220849 | ENSP00000278616 |
| ENSP00000220849 | ENSP00000281708 |
| ENSP00000220849 | ENSP00000283195 |
| ENSP00000220849 | ENSP00000290795 |
| ENSP00000220849 | ENSP00000291576 |
| ENSP00000220849 | ENSP00000296930 |
| ENSP00000220849 | ENSP00000297185 |
| ENSP00000220849 | ENSP00000299259 |
| ENSP00000220849 | ENSP00000302768 |
| ENSP00000220849 | ENSP00000304102 |
| ENSP00000220849 | ENSP00000304822 |
| ENSP00000220849 | ENSP00000310040 |
| ENSP00000220849 | ENSP00000310129 |
| ENSP00000220849 | ENSP00000316476 |
| ENSP00000220849 | ENSP00000316879 |
| ENSP00000220849 | ENSP00000318195 |

|                 |                 |
|-----------------|-----------------|
| ENSP00000220849 | ENSP00000319977 |
| ENSP00000220849 | ENSP00000326806 |
| ENSP00000220849 | ENSP00000328103 |
| ENSP00000220849 | ENSP00000329466 |
| ENSP00000220849 | ENSP00000329715 |
| ENSP00000220849 | ENSP00000332444 |
| ENSP00000220849 | ENSP00000340281 |
| ENSP00000220849 | ENSP00000346340 |
| ENSP00000220849 | ENSP00000346453 |
| ENSP00000220849 | ENSP00000347206 |
| ENSP00000220849 | ENSP00000348442 |
| ENSP00000220849 | ENSP00000354125 |
| ENSP00000220849 | ENSP00000355370 |
| ENSP00000220849 | ENSP00000358140 |
| ENSP00000220849 | ENSP00000361949 |
| ENSP00000220849 | ENSP00000362688 |
| ENSP00000220849 | ENSP00000362900 |
| ENSP00000220849 | ENSP00000364847 |
| ENSP00000220849 | ENSP00000365175 |
| ENSP00000220849 | ENSP00000376309 |
| ENSP00000220849 | ENSP00000381293 |
| ENSP00000220849 | ENSP00000381891 |
| ENSP00000220849 | ENSP00000387477 |
| ENSP00000220849 | ENSP00000401371 |
| ENSP00000220849 | ENSP00000415363 |
| ENSP00000220849 | ENSP00000416892 |
| ENSP00000220853 | ENSP00000243253 |
| ENSP00000220853 | ENSP00000245046 |
| ENSP00000220853 | ENSP00000253457 |
| ENSP00000220853 | ENSP00000267750 |
| ENSP00000220853 | ENSP00000277010 |
| ENSP00000220853 | ENSP00000283351 |
| ENSP00000220853 | ENSP00000301281 |
| ENSP00000220853 | ENSP00000302176 |
| ENSP00000220853 | ENSP00000327716 |
| ENSP00000220853 | ENSP00000354522 |
| ENSP00000220853 | ENSP00000360645 |
| ENSP00000220853 | ENSP00000361845 |
| ENSP00000220853 | ENSP00000420608 |
| ENSP00000220913 | ENSP00000265717 |
| ENSP00000220913 | ENSP00000269216 |
| ENSP00000220913 | ENSP00000291688 |
| ENSP00000220913 | ENSP00000307684 |
| ENSP00000220913 | ENSP00000316114 |
| ENSP00000220913 | ENSP00000324560 |
| ENSP00000220913 | ENSP00000340954 |

|                 |                 |
|-----------------|-----------------|
| ENSP00000220913 | ENSP00000345681 |
| ENSP00000220913 | ENSP00000353458 |
| ENSP00000220913 | ENSP00000379065 |
| ENSP00000220913 | ENSP00000379607 |
| ENSP00000220913 | ENSP00000384434 |
| ENSP00000220913 | ENSP00000396749 |
| ENSP00000220913 | ENSP00000400312 |
| ENSP00000220913 | ENSP00000417281 |
| ENSP00000220959 | ENSP00000248553 |
| ENSP00000220959 | ENSP00000260810 |
| ENSP00000220959 | ENSP00000261531 |
| ENSP00000220959 | ENSP00000261942 |
| ENSP00000220959 | ENSP00000262643 |
| ENSP00000220959 | ENSP00000263390 |
| ENSP00000220959 | ENSP00000265192 |
| ENSP00000220959 | ENSP00000265849 |
| ENSP00000220959 | ENSP00000268957 |
| ENSP00000220959 | ENSP00000290158 |
| ENSP00000220959 | ENSP00000294008 |
| ENSP00000220959 | ENSP00000294119 |
| ENSP00000220959 | ENSP00000296328 |
| ENSP00000220959 | ENSP00000297185 |
| ENSP00000220959 | ENSP00000297261 |
| ENSP00000220959 | ENSP00000301764 |
| ENSP00000220959 | ENSP00000302530 |
| ENSP00000220959 | ENSP00000302768 |
| ENSP00000220959 | ENSP00000307491 |
| ENSP00000220959 | ENSP00000317636 |
| ENSP00000220959 | ENSP00000325120 |
| ENSP00000220959 | ENSP00000326767 |
| ENSP00000220959 | ENSP00000329466 |
| ENSP00000220959 | ENSP00000331057 |
| ENSP00000220959 | ENSP00000333873 |
| ENSP00000220959 | ENSP00000337340 |
| ENSP00000220959 | ENSP00000341024 |
| ENSP00000220959 | ENSP00000343701 |
| ENSP00000220959 | ENSP00000348168 |
| ENSP00000220959 | ENSP00000348442 |
| ENSP00000220959 | ENSP00000348784 |
| ENSP00000220959 | ENSP00000348877 |
| ENSP00000220959 | ENSP00000349640 |
| ENSP00000220959 | ENSP00000361990 |
| ENSP00000220959 | ENSP00000364847 |
| ENSP00000220959 | ENSP00000379144 |
| ENSP00000220959 | ENSP00000386165 |
| ENSP00000220959 | ENSP00000396068 |

|                 |                 |
|-----------------|-----------------|
| ENSP00000220959 | ENSP00000399968 |
| ENSP00000220959 | ENSP00000406490 |
| ENSP00000221114 | ENSP00000259632 |
| ENSP00000221114 | ENSP00000300087 |
| ENSP00000221114 | ENSP00000346067 |
| ENSP00000221114 | ENSP00000408910 |
| ENSP00000221114 | ENSP00000414906 |
| ENSP00000221132 | ENSP00000239849 |
| ENSP00000221132 | ENSP00000259808 |
| ENSP00000221132 | ENSP00000286186 |
| ENSP00000221132 | ENSP00000301838 |
| ENSP00000221132 | ENSP00000310933 |
| ENSP00000221132 | ENSP00000340278 |
| ENSP00000221132 | ENSP00000341268 |
| ENSP00000221132 | ENSP00000341692 |
| ENSP00000221132 | ENSP00000374455 |
| ENSP00000221232 | ENSP00000225916 |
| ENSP00000221232 | ENSP00000229195 |
| ENSP00000221232 | ENSP00000233078 |
| ENSP00000221232 | ENSP00000240159 |
| ENSP00000221232 | ENSP00000247219 |
| ENSP00000221232 | ENSP00000251038 |
| ENSP00000221232 | ENSP00000252115 |
| ENSP00000221232 | ENSP00000254900 |
| ENSP00000221232 | ENSP00000256897 |
| ENSP00000221232 | ENSP00000260210 |
| ENSP00000221232 | ENSP00000261741 |
| ENSP00000221232 | ENSP00000261951 |
| ENSP00000221232 | ENSP00000262367 |
| ENSP00000221232 | ENSP00000263702 |
| ENSP00000221232 | ENSP00000263857 |
| ENSP00000221232 | ENSP00000263974 |
| ENSP00000221232 | ENSP00000264157 |
| ENSP00000221232 | ENSP00000264389 |
| ENSP00000221232 | ENSP00000268957 |
| ENSP00000221232 | ENSP00000273064 |
| ENSP00000221232 | ENSP00000276072 |
| ENSP00000221232 | ENSP00000280701 |
| ENSP00000221232 | ENSP00000285896 |
| ENSP00000221232 | ENSP00000288774 |
| ENSP00000221232 | ENSP00000290429 |
| ENSP00000221232 | ENSP00000291688 |
| ENSP00000221232 | ENSP00000294168 |
| ENSP00000221232 | ENSP00000295926 |
| ENSP00000221232 | ENSP00000295989 |
| ENSP00000221232 | ENSP00000296328 |

|                 |                 |
|-----------------|-----------------|
| ENSP00000221232 | ENSP00000296509 |
| ENSP00000221232 | ENSP00000302160 |
| ENSP00000221232 | ENSP00000302640 |
| ENSP00000221232 | ENSP00000313350 |
| ENSP00000221232 | ENSP00000314949 |
| ENSP00000221232 | ENSP00000318374 |
| ENSP00000221232 | ENSP00000320566 |
| ENSP00000221232 | ENSP00000320949 |
| ENSP00000221232 | ENSP00000322242 |
| ENSP00000221232 | ENSP00000325376 |
| ENSP00000221232 | ENSP00000326261 |
| ENSP00000221232 | ENSP00000329029 |
| ENSP00000221232 | ENSP00000331817 |
| ENSP00000221232 | ENSP00000337839 |
| ENSP00000221232 | ENSP00000339095 |
| ENSP00000221232 | ENSP00000339191 |
| ENSP00000221232 | ENSP00000340271 |
| ENSP00000221232 | ENSP00000344537 |
| ENSP00000221232 | ENSP00000354673 |
| ENSP00000221232 | ENSP00000355051 |
| ENSP00000221232 | ENSP00000358854 |
| ENSP00000221232 | ENSP00000359531 |
| ENSP00000221232 | ENSP00000359939 |
| ENSP00000221232 | ENSP00000360473 |
| ENSP00000221232 | ENSP00000360532 |
| ENSP00000221232 | ENSP00000361287 |
| ENSP00000221232 | ENSP00000366135 |
| ENSP00000221232 | ENSP00000369965 |
| ENSP00000221232 | ENSP00000371475 |
| ENSP00000221232 | ENSP00000372023 |
| ENSP00000221232 | ENSP00000374529 |
| ENSP00000221232 | ENSP00000380460 |
| ENSP00000221232 | ENSP00000387170 |
| ENSP00000221232 | ENSP00000388872 |
| ENSP00000221232 | ENSP00000391944 |
| ENSP00000221249 | ENSP00000255389 |
| ENSP00000221249 | ENSP00000259569 |
| ENSP00000221249 | ENSP00000261015 |
| ENSP00000221249 | ENSP00000318351 |
| ENSP00000221249 | ENSP00000346453 |
| ENSP00000221249 | ENSP00000346725 |
| ENSP00000221249 | ENSP00000353622 |
| ENSP00000221249 | ENSP00000361465 |
| ENSP00000221249 | ENSP00000368565 |
| ENSP00000221249 | ENSP00000403852 |
| ENSP00000221265 | ENSP00000221859 |

|                 |                 |
|-----------------|-----------------|
| ENSP00000221265 | ENSP00000224140 |
| ENSP00000221265 | ENSP00000225504 |
| ENSP00000221265 | ENSP00000240079 |
| ENSP00000221265 | ENSP00000248566 |
| ENSP00000221265 | ENSP00000251038 |
| ENSP00000221265 | ENSP00000253107 |
| ENSP00000221265 | ENSP00000256398 |
| ENSP00000221265 | ENSP00000261601 |
| ENSP00000221265 | ENSP00000261951 |
| ENSP00000221265 | ENSP00000262803 |
| ENSP00000221265 | ENSP00000265354 |
| ENSP00000221265 | ENSP00000265562 |
| ENSP00000221265 | ENSP00000273077 |
| ENSP00000221265 | ENSP00000276590 |
| ENSP00000221265 | ENSP00000278412 |
| ENSP00000221265 | ENSP00000280614 |
| ENSP00000221265 | ENSP00000286835 |
| ENSP00000221265 | ENSP00000289013 |
| ENSP00000221265 | ENSP00000296292 |
| ENSP00000221265 | ENSP00000296786 |
| ENSP00000221265 | ENSP00000298937 |
| ENSP00000221265 | ENSP00000299424 |
| ENSP00000221265 | ENSP00000299543 |
| ENSP00000221265 | ENSP00000299601 |
| ENSP00000221265 | ENSP00000300648 |
| ENSP00000221265 | ENSP00000300738 |
| ENSP00000221265 | ENSP00000301280 |
| ENSP00000221265 | ENSP00000303315 |
| ENSP00000221265 | ENSP00000307387 |
| ENSP00000221265 | ENSP00000309142 |
| ENSP00000221265 | ENSP00000314776 |
| ENSP00000221265 | ENSP00000314949 |
| ENSP00000221265 | ENSP00000319104 |
| ENSP00000221265 | ENSP00000329715 |
| ENSP00000221265 | ENSP00000329933 |
| ENSP00000221265 | ENSP00000339933 |
| ENSP00000221265 | ENSP00000340823 |
| ENSP00000221265 | ENSP00000340944 |
| ENSP00000221265 | ENSP00000343190 |
| ENSP00000221265 | ENSP00000343742 |
| ENSP00000221265 | ENSP00000350967 |
| ENSP00000221265 | ENSP00000351596 |
| ENSP00000221265 | ENSP00000354977 |
| ENSP00000221265 | ENSP00000355013 |
| ENSP00000221265 | ENSP00000356146 |
| ENSP00000221265 | ENSP00000356405 |

|                 |                 |
|-----------------|-----------------|
| ENSP00000221265 | ENSP00000357602 |
| ENSP00000221265 | ENSP00000360116 |
| ENSP00000221265 | ENSP00000360515 |
| ENSP00000221265 | ENSP00000362334 |
| ENSP00000221265 | ENSP00000363779 |
| ENSP00000221265 | ENSP00000365025 |
| ENSP00000221265 | ENSP00000366135 |
| ENSP00000221265 | ENSP00000366746 |
| ENSP00000221265 | ENSP00000367029 |
| ENSP00000221265 | ENSP00000369695 |
| ENSP00000221265 | ENSP00000374280 |
| ENSP00000221265 | ENSP00000376097 |
| ENSP00000221265 | ENSP00000379217 |
| ENSP00000221265 | ENSP00000386759 |
| ENSP00000221265 | ENSP00000403852 |
| ENSP00000221403 | ENSP00000222330 |
| ENSP00000221403 | ENSP00000231487 |
| ENSP00000221403 | ENSP00000265073 |
| ENSP00000221403 | ENSP00000280871 |
| ENSP00000221403 | ENSP00000282892 |
| ENSP00000221403 | ENSP00000287878 |
| ENSP00000221403 | ENSP00000298746 |
| ENSP00000221403 | ENSP00000301364 |
| ENSP00000221403 | ENSP00000304350 |
| ENSP00000221403 | ENSP00000307684 |
| ENSP00000221403 | ENSP00000318318 |
| ENSP00000221403 | ENSP00000332444 |
| ENSP00000221403 | ENSP00000336842 |
| ENSP00000221403 | ENSP00000349577 |
| ENSP00000221403 | ENSP00000357907 |
| ENSP00000221403 | ENSP00000358563 |
| ENSP00000221403 | ENSP00000361982 |
| ENSP00000221403 | ENSP00000361990 |
| ENSP00000221403 | ENSP00000366620 |
| ENSP00000221403 | ENSP00000368119 |
| ENSP00000221403 | ENSP00000420608 |
| ENSP00000221419 | ENSP00000225983 |
| ENSP00000221419 | ENSP00000256474 |
| ENSP00000221419 | ENSP00000262982 |
| ENSP00000221419 | ENSP00000264731 |
| ENSP00000221419 | ENSP00000282486 |
| ENSP00000221419 | ENSP00000298852 |
| ENSP00000221419 | ENSP00000301740 |
| ENSP00000221419 | ENSP00000312318 |
| ENSP00000221419 | ENSP00000322016 |
| ENSP00000221419 | ENSP00000345530 |

|                 |                 |
|-----------------|-----------------|
| ENSP00000221419 | ENSP00000351947 |
| ENSP00000221419 | ENSP00000353735 |
| ENSP00000221419 | ENSP00000353920 |
| ENSP00000221419 | ENSP00000354522 |
| ENSP00000221419 | ENSP00000360876 |
| ENSP00000221419 | ENSP00000363373 |
| ENSP00000221419 | ENSP00000365439 |
| ENSP00000221419 | ENSP00000366237 |
| ENSP00000221419 | ENSP00000379607 |
| ENSP00000221419 | ENSP00000379847 |
| ENSP00000221419 | ENSP00000381293 |
| ENSP00000221431 | ENSP00000225298 |
| ENSP00000221431 | ENSP00000231487 |
| ENSP00000221431 | ENSP00000233078 |
| ENSP00000221431 | ENSP00000235521 |
| ENSP00000221431 | ENSP00000240185 |
| ENSP00000221431 | ENSP00000256854 |
| ENSP00000221431 | ENSP00000258499 |
| ENSP00000221431 | ENSP00000264161 |
| ENSP00000221431 | ENSP00000264705 |
| ENSP00000221431 | ENSP00000270223 |
| ENSP00000221431 | ENSP00000297338 |
| ENSP00000221431 | ENSP00000298746 |
| ENSP00000221431 | ENSP00000301585 |
| ENSP00000221431 | ENSP00000304102 |
| ENSP00000221431 | ENSP00000304592 |
| ENSP00000221431 | ENSP00000311766 |
| ENSP00000221431 | ENSP00000312356 |
| ENSP00000221431 | ENSP00000322016 |
| ENSP00000221431 | ENSP00000325448 |
| ENSP00000221431 | ENSP00000340019 |
| ENSP00000221431 | ENSP00000341243 |
| ENSP00000221431 | ENSP00000347495 |
| ENSP00000221431 | ENSP00000350512 |
| ENSP00000221431 | ENSP00000354347 |
| ENSP00000221431 | ENSP00000355890 |
| ENSP00000221431 | ENSP00000365775 |
| ENSP00000221431 | ENSP00000369335 |
| ENSP00000221431 | ENSP00000371888 |
| ENSP00000221431 | ENSP00000377914 |
| ENSP00000221448 | ENSP00000221494 |
| ENSP00000221448 | ENSP00000226796 |
| ENSP00000221448 | ENSP00000227524 |
| ENSP00000221448 | ENSP00000231487 |
| ENSP00000221448 | ENSP00000240304 |
| ENSP00000221448 | ENSP00000242719 |



|                 |                 |
|-----------------|-----------------|
| ENSP00000221448 | ENSP00000243563 |
| ENSP00000221448 | ENSP00000244204 |
| ENSP00000221448 | ENSP00000244520 |
| ENSP00000221448 | ENSP00000254193 |
| ENSP00000221448 | ENSP00000254942 |
| ENSP00000221448 | ENSP00000258428 |
| ENSP00000221448 | ENSP00000261531 |
| ENSP00000221448 | ENSP00000261776 |
| ENSP00000221448 | ENSP00000261973 |
| ENSP00000221448 | ENSP00000262803 |
| ENSP00000221448 | ENSP00000265073 |
| ENSP00000221448 | ENSP00000265334 |
| ENSP00000221448 | ENSP00000266735 |
| ENSP00000221448 | ENSP00000299543 |
| ENSP00000221448 | ENSP00000300291 |
| ENSP00000221448 | ENSP00000300413 |
| ENSP00000221448 | ENSP00000301740 |
| ENSP00000221448 | ENSP00000301764 |
| ENSP00000221448 | ENSP00000302768 |
| ENSP00000221448 | ENSP00000304350 |
| ENSP00000221448 | ENSP00000305790 |
| ENSP00000221448 | ENSP00000307863 |
| ENSP00000221448 | ENSP00000308533 |
| ENSP00000221448 | ENSP00000310448 |
| ENSP00000221448 | ENSP00000313674 |
| ENSP00000221448 | ENSP00000313829 |
| ENSP00000221448 | ENSP00000315859 |
| ENSP00000221448 | ENSP00000316879 |
| ENSP00000221448 | ENSP00000319169 |
| ENSP00000221448 | ENSP00000322016 |
| ENSP00000221448 | ENSP00000326806 |
| ENSP00000221448 | ENSP00000329466 |
| ENSP00000221448 | ENSP00000331879 |
| ENSP00000221448 | ENSP00000333666 |
| ENSP00000221448 | ENSP00000336524 |
| ENSP00000221448 | ENSP00000336712 |
| ENSP00000221448 | ENSP00000337405 |
| ENSP00000221448 | ENSP00000340281 |
| ENSP00000221448 | ENSP00000341551 |
| ENSP00000221448 | ENSP00000342374 |
| ENSP00000221448 | ENSP00000348010 |
| ENSP00000221448 | ENSP00000349748 |
| ENSP00000221448 | ENSP00000353564 |
| ENSP00000221448 | ENSP00000358374 |
| ENSP00000221448 | ENSP00000359206 |
| ENSP00000221448 | ENSP00000359958 |

|                 |                 |
|-----------------|-----------------|
| ENSP00000221448 | ENSP00000360147 |
| ENSP00000221448 | ENSP00000360464 |
| ENSP00000221448 | ENSP00000360532 |
| ENSP00000221448 | ENSP00000360876 |
| ENSP00000221448 | ENSP00000361577 |
| ENSP00000221448 | ENSP00000362110 |
| ENSP00000221448 | ENSP00000362820 |
| ENSP00000221448 | ENSP00000362900 |
| ENSP00000221448 | ENSP00000362936 |
| ENSP00000221448 | ENSP00000364289 |
| ENSP00000221448 | ENSP00000366607 |
| ENSP00000221448 | ENSP00000368801 |
| ENSP00000221448 | ENSP00000370083 |
| ENSP00000221448 | ENSP00000370119 |
| ENSP00000221448 | ENSP00000370377 |
| ENSP00000221448 | ENSP00000377262 |
| ENSP00000221448 | ENSP00000378350 |
| ENSP00000221448 | ENSP00000379093 |
| ENSP00000221448 | ENSP00000379607 |
| ENSP00000221448 | ENSP00000381216 |
| ENSP00000221448 | ENSP00000383059 |
| ENSP00000221448 | ENSP00000400591 |
| ENSP00000221448 | ENSP00000405963 |
| ENSP00000221448 | ENSP00000412566 |
| ENSP00000221448 | ENSP00000420195 |
| ENSP00000221455 | ENSP00000244769 |
| ENSP00000221455 | ENSP00000254942 |
| ENSP00000221455 | ENSP00000381932 |
| ENSP00000221466 | ENSP00000295897 |
| ENSP00000221466 | ENSP00000378394 |
| ENSP00000221480 | ENSP00000223136 |
| ENSP00000221480 | ENSP00000225873 |
| ENSP00000221480 | ENSP00000241052 |
| ENSP00000221480 | ENSP00000256216 |
| ENSP00000221480 | ENSP00000288774 |
| ENSP00000221480 | ENSP00000295030 |
| ENSP00000221480 | ENSP00000320646 |
| ENSP00000221480 | ENSP00000349016 |
| ENSP00000221480 | ENSP00000349543 |
| ENSP00000221480 | ENSP00000356563 |
| ENSP00000221480 | ENSP00000358312 |
| ENSP00000221480 | ENSP00000407401 |
| ENSP00000221486 | ENSP00000233146 |
| ENSP00000221486 | ENSP00000234420 |
| ENSP00000221486 | ENSP00000241436 |
| ENSP00000221486 | ENSP00000251038 |

|                 |                 |
|-----------------|-----------------|
| ENSP00000221486 | ENSP00000258428 |
| ENSP00000221486 | ENSP00000264951 |
| ENSP00000221486 | ENSP00000265081 |
| ENSP00000221486 | ENSP00000288774 |
| ENSP00000221486 | ENSP00000298139 |
| ENSP00000221486 | ENSP00000302801 |
| ENSP00000221486 | ENSP00000308193 |
| ENSP00000221486 | ENSP00000311873 |
| ENSP00000221486 | ENSP00000313350 |
| ENSP00000221486 | ENSP00000317039 |
| ENSP00000221486 | ENSP00000317636 |
| ENSP00000221486 | ENSP00000318977 |
| ENSP00000221486 | ENSP00000322570 |
| ENSP00000221486 | ENSP00000323439 |
| ENSP00000221486 | ENSP00000325863 |
| ENSP00000221486 | ENSP00000337405 |
| ENSP00000221486 | ENSP00000337623 |
| ENSP00000221486 | ENSP00000340305 |
| ENSP00000221486 | ENSP00000343392 |
| ENSP00000221486 | ENSP00000347232 |
| ENSP00000221486 | ENSP00000347978 |
| ENSP00000221486 | ENSP00000348107 |
| ENSP00000221486 | ENSP00000351284 |
| ENSP00000221486 | ENSP00000351697 |
| ENSP00000221486 | ENSP00000353622 |
| ENSP00000221486 | ENSP00000354522 |
| ENSP00000221486 | ENSP00000361310 |
| ENSP00000221486 | ENSP00000364126 |
| ENSP00000221486 | ENSP00000368349 |
| ENSP00000221486 | ENSP00000368438 |
| ENSP00000221486 | ENSP00000374399 |
| ENSP00000221486 | ENSP00000394869 |
| ENSP00000221494 | ENSP00000222969 |
| ENSP00000221494 | ENSP00000227524 |
| ENSP00000221494 | ENSP00000236273 |
| ENSP00000221494 | ENSP00000242784 |
| ENSP00000221494 | ENSP00000243563 |
| ENSP00000221494 | ENSP00000244520 |
| ENSP00000221494 | ENSP00000246190 |
| ENSP00000221494 | ENSP00000247001 |
| ENSP00000221494 | ENSP00000248378 |
| ENSP00000221494 | ENSP00000252115 |
| ENSP00000221494 | ENSP00000253363 |
| ENSP00000221494 | ENSP00000254193 |
| ENSP00000221494 | ENSP00000259235 |
| ENSP00000221494 | ENSP00000260210 |

|                 |                 |
|-----------------|-----------------|
| ENSP00000221494 | ENSP00000261167 |
| ENSP00000221494 | ENSP00000261531 |
| ENSP00000221494 | ENSP00000261973 |
| ENSP00000221494 | ENSP00000262498 |
| ENSP00000221494 | ENSP00000262518 |
| ENSP00000221494 | ENSP00000262710 |
| ENSP00000221494 | ENSP00000263697 |
| ENSP00000221494 | ENSP00000265872 |
| ENSP00000221494 | ENSP00000266079 |
| ENSP00000221494 | ENSP00000266735 |
| ENSP00000221494 | ENSP00000267812 |
| ENSP00000221494 | ENSP00000268482 |
| ENSP00000221494 | ENSP00000271526 |
| ENSP00000221494 | ENSP00000271628 |
| ENSP00000221494 | ENSP00000276201 |
| ENSP00000221494 | ENSP00000291688 |
| ENSP00000221494 | ENSP00000296702 |
| ENSP00000221494 | ENSP00000300413 |
| ENSP00000221494 | ENSP00000301011 |
| ENSP00000221494 | ENSP00000301740 |
| ENSP00000221494 | ENSP00000302160 |
| ENSP00000221494 | ENSP00000302768 |
| ENSP00000221494 | ENSP00000303191 |
| ENSP00000221494 | ENSP00000304350 |
| ENSP00000221494 | ENSP00000304370 |
| ENSP00000221494 | ENSP00000304903 |
| ENSP00000221494 | ENSP00000305790 |
| ENSP00000221494 | ENSP00000307863 |
| ENSP00000221494 | ENSP00000310448 |
| ENSP00000221494 | ENSP00000310723 |
| ENSP00000221494 | ENSP00000311677 |
| ENSP00000221494 | ENSP00000313674 |
| ENSP00000221494 | ENSP00000314491 |
| ENSP00000221494 | ENSP00000315379 |
| ENSP00000221494 | ENSP00000315859 |
| ENSP00000221494 | ENSP00000316109 |
| ENSP00000221494 | ENSP00000316879 |
| ENSP00000221494 | ENSP00000318861 |
| ENSP00000221494 | ENSP00000322016 |
| ENSP00000221494 | ENSP00000323302 |
| ENSP00000221494 | ENSP00000326261 |
| ENSP00000221494 | ENSP00000326806 |
| ENSP00000221494 | ENSP00000331817 |
| ENSP00000221494 | ENSP00000333376 |
| ENSP00000221494 | ENSP00000334148 |
| ENSP00000221494 | ENSP00000335321 |

|                 |                 |
|-----------------|-----------------|
| ENSP00000221494 | ENSP00000337405 |
| ENSP00000221494 | ENSP00000337501 |
| ENSP00000221494 | ENSP00000337632 |
| ENSP00000221494 | ENSP00000339090 |
| ENSP00000221494 | ENSP00000340019 |
| ENSP00000221494 | ENSP00000340281 |
| ENSP00000221494 | ENSP00000342374 |
| ENSP00000221494 | ENSP00000346236 |
| ENSP00000221494 | ENSP00000347592 |
| ENSP00000221494 | ENSP00000352308 |
| ENSP00000221494 | ENSP00000355011 |
| ENSP00000221494 | ENSP00000355050 |
| ENSP00000221494 | ENSP00000355205 |
| ENSP00000221494 | ENSP00000356520 |
| ENSP00000221494 | ENSP00000356541 |
| ENSP00000221494 | ENSP00000357631 |
| ENSP00000221494 | ENSP00000358554 |
| ENSP00000221494 | ENSP00000358605 |
| ENSP00000221494 | ENSP00000360286 |
| ENSP00000221494 | ENSP00000360532 |
| ENSP00000221494 | ENSP00000362110 |
| ENSP00000221494 | ENSP00000362820 |
| ENSP00000221494 | ENSP00000362900 |
| ENSP00000221494 | ENSP00000362936 |
| ENSP00000221494 | ENSP00000363313 |
| ENSP00000221494 | ENSP00000363745 |
| ENSP00000221494 | ENSP00000364289 |
| ENSP00000221494 | ENSP00000365439 |
| ENSP00000221494 | ENSP00000365747 |
| ENSP00000221494 | ENSP00000366607 |
| ENSP00000221494 | ENSP00000366829 |
| ENSP00000221494 | ENSP00000368801 |
| ENSP00000221494 | ENSP00000368856 |
| ENSP00000221494 | ENSP00000369218 |
| ENSP00000221494 | ENSP00000374213 |
| ENSP00000221494 | ENSP00000375863 |
| ENSP00000221494 | ENSP00000376309 |
| ENSP00000221494 | ENSP00000378165 |
| ENSP00000221494 | ENSP00000383059 |
| ENSP00000221494 | ENSP00000400591 |
| ENSP00000221494 | ENSP00000404121 |
| ENSP00000221494 | ENSP00000412566 |
| ENSP00000221494 | ENSP00000416959 |
| ENSP00000221496 | ENSP00000257863 |
| ENSP00000221496 | ENSP00000274712 |
| ENSP00000221496 | ENSP00000297261 |

|                 |                 |
|-----------------|-----------------|
| ENSP00000221496 | ENSP00000306894 |
| ENSP00000221496 | ENSP00000332353 |
| ENSP00000221496 | ENSP00000350512 |
| ENSP00000221496 | ENSP00000365943 |
| ENSP00000221498 | ENSP00000300574 |
| ENSP00000221498 | ENSP00000325508 |
| ENSP00000221498 | ENSP00000390783 |
| ENSP00000221498 | ENSP00000400223 |
| ENSP00000221554 | ENSP00000227524 |
| ENSP00000221554 | ENSP00000252137 |
| ENSP00000221554 | ENSP00000261531 |
| ENSP00000221554 | ENSP00000261745 |
| ENSP00000221554 | ENSP00000264233 |
| ENSP00000221554 | ENSP00000268206 |
| ENSP00000221554 | ENSP00000278886 |
| ENSP00000221554 | ENSP00000291688 |
| ENSP00000221554 | ENSP00000295488 |
| ENSP00000221554 | ENSP00000296805 |
| ENSP00000221554 | ENSP00000298288 |
| ENSP00000221554 | ENSP00000298532 |
| ENSP00000221554 | ENSP00000304350 |
| ENSP00000221554 | ENSP00000304370 |
| ENSP00000221554 | ENSP00000307491 |
| ENSP00000221554 | ENSP00000326531 |
| ENSP00000221554 | ENSP00000334148 |
| ENSP00000221554 | ENSP00000351137 |
| ENSP00000221554 | ENSP00000355296 |
| ENSP00000221554 | ENSP00000359454 |
| ENSP00000221554 | ENSP00000360532 |
| ENSP00000221554 | ENSP00000364212 |
| ENSP00000221554 | ENSP00000364289 |
| ENSP00000221554 | ENSP00000366557 |
| ENSP00000221554 | ENSP00000376973 |
| ENSP00000221554 | ENSP00000387006 |
| ENSP00000221554 | ENSP00000416583 |
| ENSP00000221566 | ENSP00000223136 |
| ENSP00000221566 | ENSP00000223641 |
| ENSP00000221566 | ENSP00000225726 |
| ENSP00000221566 | ENSP00000230882 |
| ENSP00000221566 | ENSP00000234590 |
| ENSP00000221566 | ENSP00000238994 |
| ENSP00000221566 | ENSP00000239944 |
| ENSP00000221566 | ENSP00000240159 |
| ENSP00000221566 | ENSP00000242465 |
| ENSP00000221566 | ENSP00000249636 |
| ENSP00000221566 | ENSP00000252487 |

|                 |                 |
|-----------------|-----------------|
| ENSP00000221566 | ENSP00000254878 |
| ENSP00000221566 | ENSP00000265857 |
| ENSP00000221566 | ENSP00000266732 |
| ENSP00000221566 | ENSP00000276570 |
| ENSP00000221566 | ENSP00000277541 |
| ENSP00000221566 | ENSP00000287143 |
| ENSP00000221566 | ENSP00000294053 |
| ENSP00000221566 | ENSP00000299767 |
| ENSP00000221566 | ENSP00000300175 |
| ENSP00000221566 | ENSP00000307674 |
| ENSP00000221566 | ENSP00000310521 |
| ENSP00000221566 | ENSP00000317331 |
| ENSP00000221566 | ENSP00000320508 |
| ENSP00000221566 | ENSP00000326981 |
| ENSP00000221566 | ENSP00000327716 |
| ENSP00000221566 | ENSP00000332171 |
| ENSP00000221566 | ENSP00000333920 |
| ENSP00000221566 | ENSP00000340864 |
| ENSP00000221566 | ENSP00000341170 |
| ENSP00000221566 | ENSP00000341551 |
| ENSP00000221566 | ENSP00000349887 |
| ENSP00000221566 | ENSP00000350005 |
| ENSP00000221566 | ENSP00000350708 |
| ENSP00000221566 | ENSP00000351665 |
| ENSP00000221566 | ENSP00000355896 |
| ENSP00000221566 | ENSP00000357360 |
| ENSP00000221566 | ENSP00000360660 |
| ENSP00000221566 | ENSP00000365131 |
| ENSP00000221566 | ENSP00000370588 |
| ENSP00000221566 | ENSP00000378517 |
| ENSP00000221566 | ENSP00000381293 |
| ENSP00000221566 | ENSP00000383115 |
| ENSP00000221566 | ENSP00000388841 |
| ENSP00000221566 | ENSP00000397956 |
| ENSP00000221573 | ENSP00000298532 |
| ENSP00000221671 | ENSP00000222005 |
| ENSP00000221855 | ENSP00000255465 |
| ENSP00000221855 | ENSP00000256031 |
| ENSP00000221855 | ENSP00000299601 |
| ENSP00000221855 | ENSP00000327009 |
| ENSP00000221855 | ENSP00000343535 |
| ENSP00000221855 | ENSP00000347719 |
| ENSP00000221855 | ENSP00000351665 |
| ENSP00000221855 | ENSP00000355560 |
| ENSP00000221855 | ENSP00000356579 |
| ENSP00000221855 | ENSP00000356989 |

|                 |                 |
|-----------------|-----------------|
| ENSP00000221855 | ENSP00000357651 |
| ENSP00000221855 | ENSP00000363734 |
| ENSP00000221855 | ENSP00000369736 |
| ENSP00000221855 | ENSP00000372694 |
| ENSP00000221855 | ENSP00000376946 |
| ENSP00000221855 | ENSP00000386621 |
| ENSP00000221855 | ENSP00000408910 |
| ENSP00000221855 | ENSP00000412319 |
| ENSP00000221855 | ENSP00000414906 |
| ENSP00000221855 | ENSP00000415678 |
| ENSP00000221859 | ENSP00000222567 |
| ENSP00000221859 | ENSP00000224862 |
| ENSP00000221859 | ENSP00000225504 |
| ENSP00000221859 | ENSP00000225728 |
| ENSP00000221859 | ENSP00000225916 |
| ENSP00000221859 | ENSP00000229971 |
| ENSP00000221859 | ENSP00000237455 |
| ENSP00000221859 | ENSP00000242719 |
| ENSP00000221859 | ENSP00000245539 |
| ENSP00000221859 | ENSP00000247843 |
| ENSP00000221859 | ENSP00000247970 |
| ENSP00000221859 | ENSP00000247977 |
| ENSP00000221859 | ENSP00000251038 |
| ENSP00000221859 | ENSP00000252445 |
| ENSP00000221859 | ENSP00000252602 |
| ENSP00000221859 | ENSP00000254719 |
| ENSP00000221859 | ENSP00000254900 |
| ENSP00000221859 | ENSP00000255764 |
| ENSP00000221859 | ENSP00000256257 |
| ENSP00000221859 | ENSP00000256379 |
| ENSP00000221859 | ENSP00000256398 |
| ENSP00000221859 | ENSP00000256897 |
| ENSP00000221859 | ENSP00000259605 |
| ENSP00000221859 | ENSP00000262498 |
| ENSP00000221859 | ENSP00000262608 |
| ENSP00000221859 | ENSP00000263390 |
| ENSP00000221859 | ENSP00000263997 |
| ENSP00000221859 | ENSP00000265073 |
| ENSP00000221859 | ENSP00000272645 |
| ENSP00000221859 | ENSP00000277865 |
| ENSP00000221859 | ENSP00000283875 |
| ENSP00000221859 | ENSP00000283882 |
| ENSP00000221859 | ENSP00000286317 |
| ENSP00000221859 | ENSP00000288199 |
| ENSP00000221859 | ENSP00000288985 |
| ENSP00000221859 | ENSP00000292363 |



|                 |                 |
|-----------------|-----------------|
| ENSP00000221859 | ENSP00000295131 |
| ENSP00000221859 | ENSP00000296509 |
| ENSP00000221859 | ENSP00000299543 |
| ENSP00000221859 | ENSP00000301788 |
| ENSP00000221859 | ENSP00000302160 |
| ENSP00000221859 | ENSP00000304321 |
| ENSP00000221859 | ENSP00000304593 |
| ENSP00000221859 | ENSP00000306906 |
| ENSP00000221859 | ENSP00000306983 |
| ENSP00000221859 | ENSP00000307491 |
| ENSP00000221859 | ENSP00000307684 |
| ENSP00000221859 | ENSP00000308944 |
| ENSP00000221859 | ENSP00000312735 |
| ENSP00000221859 | ENSP00000314949 |
| ENSP00000221859 | ENSP00000315791 |
| ENSP00000221859 | ENSP00000315950 |
| ENSP00000221859 | ENSP00000317636 |
| ENSP00000221859 | ENSP00000318604 |
| ENSP00000221859 | ENSP00000318674 |
| ENSP00000221859 | ENSP00000321386 |
| ENSP00000221859 | ENSP00000321927 |
| ENSP00000221859 | ENSP00000324124 |
| ENSP00000221859 | ENSP00000325677 |
| ENSP00000221859 | ENSP00000330098 |
| ENSP00000221859 | ENSP00000334188 |
| ENSP00000221859 | ENSP00000334675 |
| ENSP00000221859 | ENSP00000336868 |
| ENSP00000221859 | ENSP00000337340 |
| ENSP00000221859 | ENSP00000339845 |
| ENSP00000221859 | ENSP00000340823 |
| ENSP00000221859 | ENSP00000342121 |
| ENSP00000221859 | ENSP00000342889 |
| ENSP00000221859 | ENSP00000345096 |
| ENSP00000221859 | ENSP00000347345 |
| ENSP00000221859 | ENSP00000347719 |
| ENSP00000221859 | ENSP00000348089 |
| ENSP00000221859 | ENSP00000348708 |
| ENSP00000221859 | ENSP00000351284 |
| ENSP00000221859 | ENSP00000351575 |
| ENSP00000221859 | ENSP00000353098 |
| ENSP00000221859 | ENSP00000354775 |
| ENSP00000221859 | ENSP00000357494 |
| ENSP00000221859 | ENSP00000357887 |
| ENSP00000221859 | ENSP00000358478 |
| ENSP00000221859 | ENSP00000359531 |
| ENSP00000221859 | ENSP00000360515 |

|                 |                 |
|-----------------|-----------------|
| ENSP00000221859 | ENSP00000364289 |
| ENSP00000221859 | ENSP00000366271 |
| ENSP00000221859 | ENSP00000366828 |
| ENSP00000221859 | ENSP00000367029 |
| ENSP00000221859 | ENSP00000369695 |
| ENSP00000221859 | ENSP00000370968 |
| ENSP00000221859 | ENSP00000371475 |
| ENSP00000221859 | ENSP00000371800 |
| ENSP00000221859 | ENSP00000377969 |
| ENSP00000221859 | ENSP00000378736 |
| ENSP00000221859 | ENSP00000380793 |
| ENSP00000221859 | ENSP00000386134 |
| ENSP00000221859 | ENSP00000386759 |
| ENSP00000221859 | ENSP00000391723 |
| ENSP00000221859 | ENSP00000403852 |
| ENSP00000221859 | ENSP00000418111 |
| ENSP00000221922 | ENSP00000267415 |
| ENSP00000221922 | ENSP00000276603 |
| ENSP00000221922 | ENSP00000350249 |
| ENSP00000221972 | ENSP00000254801 |
| ENSP00000221972 | ENSP00000265132 |
| ENSP00000221972 | ENSP00000313419 |
| ENSP00000221972 | ENSP00000342681 |
| ENSP00000221972 | ENSP00000346839 |
| ENSP00000221972 | ENSP00000348888 |
| ENSP00000221972 | ENSP00000356346 |
| ENSP00000221972 | ENSP00000364898 |
| ENSP00000221972 | ENSP00000373952 |
| ENSP00000221972 | ENSP00000376544 |
| ENSP00000221978 | ENSP00000356737 |
| ENSP00000221980 | ENSP00000326366 |
| ENSP00000221980 | ENSP00000327513 |
| ENSP00000222005 | ENSP00000230510 |
| ENSP00000222005 | ENSP00000234626 |
| ENSP00000222005 | ENSP00000254942 |
| ENSP00000222005 | ENSP00000262315 |
| ENSP00000222005 | ENSP00000263043 |
| ENSP00000222005 | ENSP00000270223 |
| ENSP00000222005 | ENSP00000276603 |
| ENSP00000222005 | ENSP00000277010 |
| ENSP00000222005 | ENSP00000288602 |
| ENSP00000222005 | ENSP00000296084 |
| ENSP00000222005 | ENSP00000298139 |
| ENSP00000222005 | ENSP00000300146 |
| ENSP00000222005 | ENSP00000304593 |
| ENSP00000222005 | ENSP00000305958 |

|                 |                 |
|-----------------|-----------------|
| ENSP00000222005 | ENSP00000311005 |
| ENSP00000222005 | ENSP00000311083 |
| ENSP00000222005 | ENSP00000312244 |
| ENSP00000222005 | ENSP00000313601 |
| ENSP00000222005 | ENSP00000317039 |
| ENSP00000222005 | ENSP00000318646 |
| ENSP00000222005 | ENSP00000321636 |
| ENSP00000222005 | ENSP00000322180 |
| ENSP00000222005 | ENSP00000324560 |
| ENSP00000222005 | ENSP00000325677 |
| ENSP00000222005 | ENSP00000329933 |
| ENSP00000222005 | ENSP00000329967 |
| ENSP00000222005 | ENSP00000338990 |
| ENSP00000222005 | ENSP00000347232 |
| ENSP00000222005 | ENSP00000351596 |
| ENSP00000222005 | ENSP00000353059 |
| ENSP00000222005 | ENSP00000353826 |
| ENSP00000222005 | ENSP00000354558 |
| ENSP00000222005 | ENSP00000354927 |
| ENSP00000222005 | ENSP00000356989 |
| ENSP00000222005 | ENSP00000357494 |
| ENSP00000222005 | ENSP00000358335 |
| ENSP00000222005 | ENSP00000364204 |
| ENSP00000222005 | ENSP00000364543 |
| ENSP00000222005 | ENSP00000365005 |
| ENSP00000222005 | ENSP00000367029 |
| ENSP00000222005 | ENSP00000370741 |
| ENSP00000222005 | ENSP00000372827 |
| ENSP00000222005 | ENSP00000373700 |
| ENSP00000222005 | ENSP00000374455 |
| ENSP00000222005 | ENSP00000378350 |
| ENSP00000222005 | ENSP00000382423 |
| ENSP00000222005 | ENSP00000386621 |
| ENSP00000222005 | ENSP00000391249 |
| ENSP00000222005 | ENSP00000394400 |
| ENSP00000222005 | ENSP00000399530 |
| ENSP00000222005 | ENSP00000400626 |
| ENSP00000222005 | ENSP00000412310 |
| ENSP00000222008 | ENSP00000223136 |
| ENSP00000222008 | ENSP00000232003 |
| ENSP00000222008 | ENSP00000238831 |
| ENSP00000222008 | ENSP00000243918 |
| ENSP00000222008 | ENSP00000245923 |
| ENSP00000222008 | ENSP00000248139 |
| ENSP00000222008 | ENSP00000250113 |
| ENSP00000222008 | ENSP00000258301 |

|                 |                 |
|-----------------|-----------------|
| ENSP00000222008 | ENSP00000263233 |
| ENSP00000222008 | ENSP00000263274 |
| ENSP00000222008 | ENSP00000263925 |
| ENSP00000222008 | ENSP00000266126 |
| ENSP00000222008 | ENSP00000267484 |
| ENSP00000222008 | ENSP00000283351 |
| ENSP00000222008 | ENSP00000284957 |
| ENSP00000222008 | ENSP00000296509 |
| ENSP00000222008 | ENSP00000304292 |
| ENSP00000222008 | ENSP00000305255 |
| ENSP00000222008 | ENSP00000307900 |
| ENSP00000222008 | ENSP00000316854 |
| ENSP00000222008 | ENSP00000317891 |
| ENSP00000222008 | ENSP00000328070 |
| ENSP00000222008 | ENSP00000329715 |
| ENSP00000222008 | ENSP00000330945 |
| ENSP00000222008 | ENSP00000336724 |
| ENSP00000222008 | ENSP00000337838 |
| ENSP00000222008 | ENSP00000338345 |
| ENSP00000222008 | ENSP00000340836 |
| ENSP00000222008 | ENSP00000342136 |
| ENSP00000222008 | ENSP00000343435 |
| ENSP00000222008 | ENSP00000344106 |
| ENSP00000222008 | ENSP00000348459 |
| ENSP00000222008 | ENSP00000349016 |
| ENSP00000222008 | ENSP00000355739 |
| ENSP00000222008 | ENSP00000356602 |
| ENSP00000222008 | ENSP00000356920 |
| ENSP00000222008 | ENSP00000359691 |
| ENSP00000222008 | ENSP00000362588 |
| ENSP00000222008 | ENSP00000365630 |
| ENSP00000222008 | ENSP00000368959 |
| ENSP00000222008 | ENSP00000370410 |
| ENSP00000222008 | ENSP00000376871 |
| ENSP00000222008 | ENSP00000377665 |
| ENSP00000222008 | ENSP00000386134 |
| ENSP00000222008 | ENSP00000386394 |
| ENSP00000222008 | ENSP00000394071 |
| ENSP00000222008 | ENSP00000402240 |
| ENSP00000222115 | ENSP00000226284 |
| ENSP00000222115 | ENSP00000243563 |
| ENSP00000222115 | ENSP00000256474 |
| ENSP00000222115 | ENSP00000281282 |
| ENSP00000222115 | ENSP00000299601 |
| ENSP00000222115 | ENSP00000332681 |
| ENSP00000222115 | ENSP00000334100 |

|                 |                 |
|-----------------|-----------------|
| ENSP00000222115 | ENSP00000337053 |
| ENSP00000222115 | ENSP00000340935 |
| ENSP00000222115 | ENSP00000348708 |
| ENSP00000222115 | ENSP00000358413 |
| ENSP00000222115 | ENSP00000361845 |
| ENSP00000222115 | ENSP00000363559 |
| ENSP00000222115 | ENSP00000382767 |
| ENSP00000222115 | ENSP00000391432 |
| ENSP00000222115 | ENSP00000397598 |
| ENSP00000222115 | ENSP00000407879 |
| ENSP00000222122 | ENSP00000273951 |
| ENSP00000222122 | ENSP00000308741 |
| ENSP00000222122 | ENSP00000319977 |
| ENSP00000222122 | ENSP00000340671 |
| ENSP00000222122 | ENSP00000348565 |
| ENSP00000222122 | ENSP00000351407 |
| ENSP00000222139 | ENSP00000222254 |
| ENSP00000222139 | ENSP00000228280 |
| ENSP00000222139 | ENSP00000244007 |
| ENSP00000222139 | ENSP00000252723 |
| ENSP00000222139 | ENSP00000262995 |
| ENSP00000222139 | ENSP00000263233 |
| ENSP00000222139 | ENSP00000281171 |
| ENSP00000222139 | ENSP00000296474 |
| ENSP00000222139 | ENSP00000340944 |
| ENSP00000222139 | ENSP00000341208 |
| ENSP00000222139 | ENSP00000342755 |
| ENSP00000222139 | ENSP00000356346 |
| ENSP00000222139 | ENSP00000359206 |
| ENSP00000222139 | ENSP00000364898 |
| ENSP00000222139 | ENSP00000365016 |
| ENSP00000222139 | ENSP00000384053 |
| ENSP00000222139 | ENSP00000409346 |
| ENSP00000222157 | ENSP00000311005 |
| ENSP00000222157 | ENSP00000339826 |
| ENSP00000222247 | ENSP00000225430 |
| ENSP00000222247 | ENSP00000230050 |
| ENSP00000222247 | ENSP00000230859 |
| ENSP00000222247 | ENSP00000238256 |
| ENSP00000222247 | ENSP00000245539 |
| ENSP00000222247 | ENSP00000252037 |
| ENSP00000222247 | ENSP00000252543 |
| ENSP00000222247 | ENSP00000253099 |
| ENSP00000222247 | ENSP00000253788 |
| ENSP00000222247 | ENSP00000254037 |
| ENSP00000222247 | ENSP00000257829 |

|                 |                 |
|-----------------|-----------------|
| ENSP00000222247 | ENSP00000258455 |
| ENSP00000222247 | ENSP00000259469 |
| ENSP00000222247 | ENSP00000260102 |
| ENSP00000222247 | ENSP00000260443 |
| ENSP00000222247 | ENSP00000262584 |
| ENSP00000222247 | ENSP00000264995 |
| ENSP00000222247 | ENSP00000265100 |
| ENSP00000222247 | ENSP00000268616 |
| ENSP00000222247 | ENSP00000268661 |
| ENSP00000222247 | ENSP00000269499 |
| ENSP00000222247 | ENSP00000270625 |
| ENSP00000222247 | ENSP00000272418 |
| ENSP00000222247 | ENSP00000274242 |
| ENSP00000222247 | ENSP00000274606 |
| ENSP00000222247 | ENSP00000274849 |
| ENSP00000222247 | ENSP00000278412 |
| ENSP00000222247 | ENSP00000278572 |
| ENSP00000222247 | ENSP00000287038 |
| ENSP00000222247 | ENSP00000294189 |
| ENSP00000222247 | ENSP00000296411 |
| ENSP00000222247 | ENSP00000296802 |
| ENSP00000222247 | ENSP00000297990 |
| ENSP00000222247 | ENSP00000298283 |
| ENSP00000222247 | ENSP00000298310 |
| ENSP00000222247 | ENSP00000300151 |
| ENSP00000222247 | ENSP00000302886 |
| ENSP00000222247 | ENSP00000302896 |
| ENSP00000222247 | ENSP00000305702 |
| ENSP00000222247 | ENSP00000306548 |
| ENSP00000222247 | ENSP00000307889 |
| ENSP00000222247 | ENSP00000308897 |
| ENSP00000222247 | ENSP00000309334 |
| ENSP00000222247 | ENSP00000309830 |
| ENSP00000222247 | ENSP00000310042 |
| ENSP00000222247 | ENSP00000311028 |
| ENSP00000222247 | ENSP00000311430 |
| ENSP00000222247 | ENSP00000312042 |
| ENSP00000222247 | ENSP00000314348 |
| ENSP00000222247 | ENSP00000317232 |
| ENSP00000222247 | ENSP00000317376 |
| ENSP00000222247 | ENSP00000317992 |
| ENSP00000222247 | ENSP00000318604 |
| ENSP00000222247 | ENSP00000318646 |
| ENSP00000222247 | ENSP00000322419 |
| ENSP00000222247 | ENSP00000325312 |
| ENSP00000222247 | ENSP00000326981 |

|                 |                 |
|-----------------|-----------------|
| ENSP00000222247 | ENSP00000329466 |
| ENSP00000222247 | ENSP00000336856 |
| ENSP00000222247 | ENSP00000337839 |
| ENSP00000222247 | ENSP00000338862 |
| ENSP00000222247 | ENSP00000339095 |
| ENSP00000222247 | ENSP00000339795 |
| ENSP00000222247 | ENSP00000341885 |
| ENSP00000222247 | ENSP00000345156 |
| ENSP00000222247 | ENSP00000346015 |
| ENSP00000222247 | ENSP00000346022 |
| ENSP00000222247 | ENSP00000346027 |
| ENSP00000222247 | ENSP00000346037 |
| ENSP00000222247 | ENSP00000346050 |
| ENSP00000222247 | ENSP00000346088 |
| ENSP00000222247 | ENSP00000346120 |
| ENSP00000222247 | ENSP00000347087 |
| ENSP00000222247 | ENSP00000352021 |
| ENSP00000222247 | ENSP00000354040 |
| ENSP00000222247 | ENSP00000354525 |
| ENSP00000222247 | ENSP00000354739 |
| ENSP00000222247 | ENSP00000355759 |
| ENSP00000222247 | ENSP00000356811 |
| ENSP00000222247 | ENSP00000359345 |
| ENSP00000222247 | ENSP00000359688 |
| ENSP00000222247 | ENSP00000361076 |
| ENSP00000222247 | ENSP00000362744 |
| ENSP00000222247 | ENSP00000363018 |
| ENSP00000222247 | ENSP00000363559 |
| ENSP00000222247 | ENSP00000363676 |
| ENSP00000222247 | ENSP00000364320 |
| ENSP00000222247 | ENSP00000369757 |
| ENSP00000222247 | ENSP00000370589 |
| ENSP00000222247 | ENSP00000373404 |
| ENSP00000222247 | ENSP00000375730 |
| ENSP00000222247 | ENSP00000377640 |
| ENSP00000222247 | ENSP00000377865 |
| ENSP00000222247 | ENSP00000378160 |
| ENSP00000222247 | ENSP00000379607 |
| ENSP00000222247 | ENSP00000379888 |
| ENSP00000222247 | ENSP00000380156 |
| ENSP00000222247 | ENSP00000380982 |
| ENSP00000222247 | ENSP00000386717 |
| ENSP00000222247 | ENSP00000389103 |
| ENSP00000222247 | ENSP00000391723 |
| ENSP00000222247 | ENSP00000393241 |
| ENSP00000222247 | ENSP00000393393 |

|                 |                 |
|-----------------|-----------------|
| ENSP00000222247 | ENSP00000402338 |
| ENSP00000222247 | ENSP00000403175 |
| ENSP00000222247 | ENSP00000412583 |
| ENSP00000222247 | ENSP00000413152 |
| ENSP00000222247 | ENSP00000414321 |
| ENSP00000222247 | ENSP00000416110 |
| ENSP00000222254 | ENSP00000226574 |
| ENSP00000222254 | ENSP00000231487 |
| ENSP00000222254 | ENSP00000237380 |
| ENSP00000222254 | ENSP00000264637 |
| ENSP00000222254 | ENSP00000265171 |
| ENSP00000222254 | ENSP00000267101 |
| ENSP00000222254 | ENSP00000269485 |
| ENSP00000222254 | ENSP00000273317 |
| ENSP00000222254 | ENSP00000295408 |
| ENSP00000222254 | ENSP00000298229 |
| ENSP00000222254 | ENSP00000300574 |
| ENSP00000222254 | ENSP00000306124 |
| ENSP00000222254 | ENSP00000312946 |
| ENSP00000222254 | ENSP00000313829 |
| ENSP00000222254 | ENSP00000327513 |
| ENSP00000222254 | ENSP00000331044 |
| ENSP00000222254 | ENSP00000340944 |
| ENSP00000222254 | ENSP00000341189 |
| ENSP00000222254 | ENSP00000347532 |
| ENSP00000222254 | ENSP00000352121 |
| ENSP00000222254 | ENSP00000355827 |
| ENSP00000222254 | ENSP00000361855 |
| ENSP00000222254 | ENSP00000364898 |
| ENSP00000222254 | ENSP00000365016 |
| ENSP00000222254 | ENSP00000365439 |
| ENSP00000222254 | ENSP00000366936 |
| ENSP00000222254 | ENSP00000381793 |
| ENSP00000222254 | ENSP00000384675 |
| ENSP00000222266 | ENSP00000257626 |
| ENSP00000222266 | ENSP00000262133 |
| ENSP00000222266 | ENSP00000294785 |
| ENSP00000222266 | ENSP00000326366 |
| ENSP00000222266 | ENSP00000329102 |
| ENSP00000222266 | ENSP00000340995 |
| ENSP00000222266 | ENSP00000341947 |
| ENSP00000222266 | ENSP00000358105 |
| ENSP00000222266 | ENSP00000362592 |
| ENSP00000222266 | ENSP00000368686 |
| ENSP00000222284 | ENSP00000379282 |
| ENSP00000222284 | ENSP00000390746 |



|                 |                 |
|-----------------|-----------------|
| ENSP00000222286 | ENSP00000233242 |
| ENSP00000222286 | ENSP00000234590 |
| ENSP00000222286 | ENSP00000245206 |
| ENSP00000222286 | ENSP00000254035 |
| ENSP00000222286 | ENSP00000258494 |
| ENSP00000222286 | ENSP00000265354 |
| ENSP00000222286 | ENSP00000282541 |
| ENSP00000222286 | ENSP00000322570 |
| ENSP00000222286 | ENSP00000327070 |
| ENSP00000222286 | ENSP00000329189 |
| ENSP00000222286 | ENSP00000336927 |
| ENSP00000222286 | ENSP00000339933 |
| ENSP00000222286 | ENSP00000340237 |
| ENSP00000222286 | ENSP00000351697 |
| ENSP00000222286 | ENSP00000361465 |
| ENSP00000222286 | ENSP00000363873 |
| ENSP00000222286 | ENSP00000367408 |
| ENSP00000222286 | ENSP00000368349 |
| ENSP00000222286 | ENSP00000373477 |
| ENSP00000222286 | ENSP00000379607 |
| ENSP00000222286 | ENSP00000417281 |
| ENSP00000222286 | ENSP00000417963 |
| ENSP00000222304 | ENSP00000261024 |
| ENSP00000222304 | ENSP00000367265 |
| ENSP00000222305 | ENSP00000241600 |
| ENSP00000222305 | ENSP00000264731 |
| ENSP00000222305 | ENSP00000278070 |
| ENSP00000222305 | ENSP00000283882 |
| ENSP00000222305 | ENSP00000296930 |
| ENSP00000222305 | ENSP00000302530 |
| ENSP00000222305 | ENSP00000306245 |
| ENSP00000222305 | ENSP00000327048 |
| ENSP00000222305 | ENSP00000336724 |
| ENSP00000222305 | ENSP00000342056 |
| ENSP00000222305 | ENSP00000345702 |
| ENSP00000222305 | ENSP00000350283 |
| ENSP00000222305 | ENSP00000374280 |
| ENSP00000222305 | ENSP00000397441 |
| ENSP00000222305 | ENSP00000417281 |
| ENSP00000222307 | ENSP00000250113 |
| ENSP00000222307 | ENSP00000258424 |
| ENSP00000222307 | ENSP00000261708 |
| ENSP00000222307 | ENSP00000263805 |
| ENSP00000222307 | ENSP00000263925 |
| ENSP00000222307 | ENSP00000279281 |
| ENSP00000222307 | ENSP00000284957 |

|                 |                 |
|-----------------|-----------------|
| ENSP00000222307 | ENSP00000288266 |
| ENSP00000222307 | ENSP00000288422 |
| ENSP00000222307 | ENSP00000326514 |
| ENSP00000222307 | ENSP00000326767 |
| ENSP00000222307 | ENSP00000334100 |
| ENSP00000222307 | ENSP00000336524 |
| ENSP00000222307 | ENSP00000343479 |
| ENSP00000222307 | ENSP00000344547 |
| ENSP00000222307 | ENSP00000349640 |
| ENSP00000222307 | ENSP00000355840 |
| ENSP00000222307 | ENSP00000363135 |
| ENSP00000222307 | ENSP00000363972 |
| ENSP00000222307 | ENSP00000366249 |
| ENSP00000222307 | ENSP00000368699 |
| ENSP00000222307 | ENSP00000370410 |
| ENSP00000222307 | ENSP00000373039 |
| ENSP00000222307 | ENSP00000373669 |
| ENSP00000222307 | ENSP00000374455 |
| ENSP00000222307 | ENSP00000381031 |
| ENSP00000222307 | ENSP00000381795 |
| ENSP00000222307 | ENSP00000386394 |
| ENSP00000222307 | ENSP00000387209 |
| ENSP00000222307 | ENSP00000396152 |
| ENSP00000222307 | ENSP00000410416 |
| ENSP00000222307 | ENSP00000417281 |
| ENSP00000222308 | ENSP00000252037 |
| ENSP00000222308 | ENSP00000253003 |
| ENSP00000222308 | ENSP00000256474 |
| ENSP00000222308 | ENSP00000259457 |
| ENSP00000222308 | ENSP00000261712 |
| ENSP00000222308 | ENSP00000262193 |
| ENSP00000222308 | ENSP00000264639 |
| ENSP00000222308 | ENSP00000276603 |
| ENSP00000222308 | ENSP00000295901 |
| ENSP00000222308 | ENSP00000298852 |
| ENSP00000222308 | ENSP00000309474 |
| ENSP00000222308 | ENSP00000310129 |
| ENSP00000222308 | ENSP00000329623 |
| ENSP00000222308 | ENSP00000332513 |
| ENSP00000222308 | ENSP00000343412 |
| ENSP00000222308 | ENSP00000348442 |
| ENSP00000222308 | ENSP00000355601 |
| ENSP00000222308 | ENSP00000359385 |
| ENSP00000222308 | ENSP00000362334 |
| ENSP00000222308 | ENSP00000370376 |
| ENSP00000222308 | ENSP00000381863 |

|                 |                 |
|-----------------|-----------------|
| ENSP00000222308 | ENSP00000396937 |
| ENSP00000222329 | ENSP00000358716 |
| ENSP00000222329 | ENSP00000363763 |
| ENSP00000222330 | ENSP00000228307 |
| ENSP00000222330 | ENSP00000229595 |
| ENSP00000222330 | ENSP00000232607 |
| ENSP00000222330 | ENSP00000236051 |
| ENSP00000222330 | ENSP00000240922 |
| ENSP00000222330 | ENSP00000245960 |
| ENSP00000222330 | ENSP00000246166 |
| ENSP00000222330 | ENSP00000249373 |
| ENSP00000222330 | ENSP00000253693 |
| ENSP00000222330 | ENSP00000256442 |
| ENSP00000222330 | ENSP00000258052 |
| ENSP00000222330 | ENSP00000262320 |
| ENSP00000222330 | ENSP00000262367 |
| ENSP00000222330 | ENSP00000262764 |
| ENSP00000222330 | ENSP00000263246 |
| ENSP00000222330 | ENSP00000264883 |
| ENSP00000222330 | ENSP00000265073 |
| ENSP00000222330 | ENSP00000265372 |
| ENSP00000222330 | ENSP00000266126 |
| ENSP00000222330 | ENSP00000267064 |
| ENSP00000222330 | ENSP00000268459 |
| ENSP00000222330 | ENSP00000273783 |
| ENSP00000222330 | ENSP00000284981 |
| ENSP00000222330 | ENSP00000295872 |
| ENSP00000222330 | ENSP00000298746 |
| ENSP00000222330 | ENSP00000300417 |
| ENSP00000222330 | ENSP00000303088 |
| ENSP00000222330 | ENSP00000307235 |
| ENSP00000222330 | ENSP00000310042 |
| ENSP00000222330 | ENSP00000310649 |
| ENSP00000222330 | ENSP00000315693 |
| ENSP00000222330 | ENSP00000316879 |
| ENSP00000222330 | ENSP00000320485 |
| ENSP00000222330 | ENSP00000320488 |
| ENSP00000222330 | ENSP00000320646 |
| ENSP00000222330 | ENSP00000323858 |
| ENSP00000222330 | ENSP00000334061 |
| ENSP00000222330 | ENSP00000339933 |
| ENSP00000222330 | ENSP00000340820 |
| ENSP00000222330 | ENSP00000343479 |
| ENSP00000222330 | ENSP00000346236 |
| ENSP00000222330 | ENSP00000351284 |
| ENSP00000222330 | ENSP00000354927 |

|                 |                 |
|-----------------|-----------------|
| ENSP00000222330 | ENSP00000355596 |
| ENSP00000222330 | ENSP00000356602 |
| ENSP00000222330 | ENSP00000356920 |
| ENSP00000222330 | ENSP00000357051 |
| ENSP00000222330 | ENSP00000358022 |
| ENSP00000222330 | ENSP00000358404 |
| ENSP00000222330 | ENSP00000358563 |
| ENSP00000222330 | ENSP00000358918 |
| ENSP00000222330 | ENSP00000362171 |
| ENSP00000222330 | ENSP00000365005 |
| ENSP00000222330 | ENSP00000369757 |
| ENSP00000222330 | ENSP00000371846 |
| ENSP00000222330 | ENSP00000372857 |
| ENSP00000222330 | ENSP00000382423 |
| ENSP00000222330 | ENSP00000385903 |
| ENSP00000222381 | ENSP00000295897 |
| ENSP00000222547 | ENSP00000223369 |
| ENSP00000222547 | ENSP00000225567 |
| ENSP00000222547 | ENSP00000225724 |
| ENSP00000222547 | ENSP00000231668 |
| ENSP00000222547 | ENSP00000236192 |
| ENSP00000222547 | ENSP00000248633 |
| ENSP00000222547 | ENSP00000249647 |
| ENSP00000222547 | ENSP00000249923 |
| ENSP00000222547 | ENSP00000252597 |
| ENSP00000222547 | ENSP00000256897 |
| ENSP00000222547 | ENSP00000258301 |
| ENSP00000222547 | ENSP00000258654 |
| ENSP00000222547 | ENSP00000259400 |
| ENSP00000222547 | ENSP00000262544 |
| ENSP00000222547 | ENSP00000262812 |
| ENSP00000222547 | ENSP00000263897 |
| ENSP00000222547 | ENSP00000264028 |
| ENSP00000222547 | ENSP00000264157 |
| ENSP00000222547 | ENSP00000265175 |
| ENSP00000222547 | ENSP00000285243 |
| ENSP00000222547 | ENSP00000286448 |
| ENSP00000222547 | ENSP00000294179 |
| ENSP00000222547 | ENSP00000295119 |
| ENSP00000222547 | ENSP00000302783 |
| ENSP00000222547 | ENSP00000305255 |
| ENSP00000222547 | ENSP00000305647 |
| ENSP00000222547 | ENSP00000305810 |
| ENSP00000222547 | ENSP00000310521 |
| ENSP00000222547 | ENSP00000311134 |
| ENSP00000222547 | ENSP00000317714 |

|                 |                 |
|-----------------|-----------------|
| ENSP00000222547 | ENSP00000320885 |
| ENSP00000222547 | ENSP00000324628 |
| ENSP00000222547 | ENSP00000325002 |
| ENSP00000222547 | ENSP00000327309 |
| ENSP00000222547 | ENSP00000327650 |
| ENSP00000222547 | ENSP00000328079 |
| ENSP00000222547 | ENSP00000329419 |
| ENSP00000222547 | ENSP00000333950 |
| ENSP00000222547 | ENSP00000340836 |
| ENSP00000222547 | ENSP00000345656 |
| ENSP00000222547 | ENSP00000347329 |
| ENSP00000222547 | ENSP00000349785 |
| ENSP00000222547 | ENSP00000355721 |
| ENSP00000222547 | ENSP00000362399 |
| ENSP00000222547 | ENSP00000366225 |
| ENSP00000222547 | ENSP00000374529 |
| ENSP00000222547 | ENSP00000381293 |
| ENSP00000222547 | ENSP00000390783 |
| ENSP00000222553 | ENSP00000264170 |
| ENSP00000222553 | ENSP00000265896 |
| ENSP00000222553 | ENSP00000294973 |
| ENSP00000222553 | ENSP00000304102 |
| ENSP00000222553 | ENSP00000310040 |
| ENSP00000222553 | ENSP00000313050 |
| ENSP00000222553 | ENSP00000320949 |
| ENSP00000222553 | ENSP00000321711 |
| ENSP00000222553 | ENSP00000329466 |
| ENSP00000222553 | ENSP00000333946 |
| ENSP00000222553 | ENSP00000346155 |
| ENSP00000222553 | ENSP00000348442 |
| ENSP00000222553 | ENSP00000350512 |
| ENSP00000222553 | ENSP00000352928 |
| ENSP00000222553 | ENSP00000354522 |
| ENSP00000222553 | ENSP00000354687 |
| ENSP00000222553 | ENSP00000355517 |
| ENSP00000222553 | ENSP00000360992 |
| ENSP00000222553 | ENSP00000373952 |
| ENSP00000222553 | ENSP00000378782 |
| ENSP00000222553 | ENSP00000396937 |
| ENSP00000222567 | ENSP00000226796 |
| ENSP00000222567 | ENSP00000228862 |
| ENSP00000222567 | ENSP00000230050 |
| ENSP00000222567 | ENSP00000238256 |
| ENSP00000222567 | ENSP00000238789 |
| ENSP00000222567 | ENSP00000247219 |
| ENSP00000222567 | ENSP00000252037 |

|                 |                 |
|-----------------|-----------------|
| ENSP00000222567 | ENSP00000254719 |
| ENSP00000222567 | ENSP00000261881 |
| ENSP00000222567 | ENSP00000263736 |
| ENSP00000222567 | ENSP00000263857 |
| ENSP00000222567 | ENSP00000274606 |
| ENSP00000222567 | ENSP00000288976 |
| ENSP00000222567 | ENSP00000293860 |
| ENSP00000222567 | ENSP00000298746 |
| ENSP00000222567 | ENSP00000302478 |
| ENSP00000222567 | ENSP00000312735 |
| ENSP00000222567 | ENSP00000314949 |
| ENSP00000222567 | ENSP00000314971 |
| ENSP00000222567 | ENSP00000317232 |
| ENSP00000222567 | ENSP00000319104 |
| ENSP00000222567 | ENSP00000321636 |
| ENSP00000222567 | ENSP00000323856 |
| ENSP00000222567 | ENSP00000324124 |
| ENSP00000222567 | ENSP00000324792 |
| ENSP00000222567 | ENSP00000330343 |
| ENSP00000222567 | ENSP00000331111 |
| ENSP00000222567 | ENSP00000332171 |
| ENSP00000222567 | ENSP00000333920 |
| ENSP00000222567 | ENSP00000335357 |
| ENSP00000222567 | ENSP00000339095 |
| ENSP00000222567 | ENSP00000342121 |
| ENSP00000222567 | ENSP00000342889 |
| ENSP00000222567 | ENSP00000351596 |
| ENSP00000222567 | ENSP00000354916 |
| ENSP00000222567 | ENSP00000358563 |
| ENSP00000222567 | ENSP00000358812 |
| ENSP00000222567 | ENSP00000361076 |
| ENSP00000222567 | ENSP00000361465 |
| ENSP00000222567 | ENSP00000361982 |
| ENSP00000222567 | ENSP00000366557 |
| ENSP00000222567 | ENSP00000367029 |
| ENSP00000222567 | ENSP00000380504 |
| ENSP00000222567 | ENSP00000383503 |
| ENSP00000222567 | ENSP00000397636 |
| ENSP00000222567 | ENSP00000403852 |
| ENSP00000222567 | ENSP00000405636 |
| ENSP00000222567 | ENSP00000406293 |
| ENSP00000222567 | ENSP00000410530 |
| ENSP00000222567 | ENSP00000410954 |
| ENSP00000222567 | ENSP00000413152 |
| ENSP00000222567 | ENSP00000414110 |
| ENSP00000222567 | ENSP00000416599 |

|                 |                 |
|-----------------|-----------------|
| ENSP00000222574 | ENSP00000246166 |
| ENSP00000222574 | ENSP00000253003 |
| ENSP00000222574 | ENSP00000261845 |
| ENSP00000222574 | ENSP00000262133 |
| ENSP00000222574 | ENSP00000262367 |
| ENSP00000222574 | ENSP00000264157 |
| ENSP00000222574 | ENSP00000267163 |
| ENSP00000222574 | ENSP00000296328 |
| ENSP00000222574 | ENSP00000296504 |
| ENSP00000222574 | ENSP00000303148 |
| ENSP00000222574 | ENSP00000306163 |
| ENSP00000222574 | ENSP00000307272 |
| ENSP00000222574 | ENSP00000311005 |
| ENSP00000222574 | ENSP00000314949 |
| ENSP00000222574 | ENSP00000353622 |
| ENSP00000222574 | ENSP00000354848 |
| ENSP00000222574 | ENSP00000365550 |
| ENSP00000222574 | ENSP00000381031 |
| ENSP00000222584 | ENSP00000263121 |
| ENSP00000222584 | ENSP00000265351 |
| ENSP00000222584 | ENSP00000265717 |
| ENSP00000222584 | ENSP00000281043 |
| ENSP00000222584 | ENSP00000329357 |
| ENSP00000222584 | ENSP00000354850 |
| ENSP00000222584 | ENSP00000369042 |
| ENSP00000222584 | ENSP00000378306 |
| ENSP00000222673 | ENSP00000228318 |
| ENSP00000222673 | ENSP00000252699 |
| ENSP00000222673 | ENSP00000254193 |
| ENSP00000222673 | ENSP00000258886 |
| ENSP00000222673 | ENSP00000263966 |
| ENSP00000222673 | ENSP00000268668 |
| ENSP00000222673 | ENSP00000277865 |
| ENSP00000222673 | ENSP00000280346 |
| ENSP00000222673 | ENSP00000282050 |
| ENSP00000222673 | ENSP00000295951 |
| ENSP00000222673 | ENSP00000317159 |
| ENSP00000222673 | ENSP00000322570 |
| ENSP00000222673 | ENSP00000330343 |
| ENSP00000222673 | ENSP00000334188 |
| ENSP00000222673 | ENSP00000335304 |
| ENSP00000222673 | ENSP00000341838 |
| ENSP00000222673 | ENSP00000351697 |
| ENSP00000222673 | ENSP00000360569 |
| ENSP00000222673 | ENSP00000361577 |
| ENSP00000222673 | ENSP00000363944 |

|                 |                 |
|-----------------|-----------------|
| ENSP00000222673 | ENSP00000368349 |
| ENSP00000222673 | ENSP00000379607 |
| ENSP00000222673 | ENSP00000387262 |
| ENSP00000222718 | ENSP00000251871 |
| ENSP00000222718 | ENSP00000267064 |
| ENSP00000222718 | ENSP00000269397 |
| ENSP00000222718 | ENSP00000276072 |
| ENSP00000222718 | ENSP00000280098 |
| ENSP00000222718 | ENSP00000281928 |
| ENSP00000222718 | ENSP00000286364 |
| ENSP00000222718 | ENSP00000340896 |
| ENSP00000222718 | ENSP00000341805 |
| ENSP00000222718 | ENSP00000343246 |
| ENSP00000222718 | ENSP00000358854 |
| ENSP00000222718 | ENSP00000364524 |
| ENSP00000222725 | ENSP00000231357 |
| ENSP00000222725 | ENSP00000257879 |
| ENSP00000222725 | ENSP00000277541 |
| ENSP00000222725 | ENSP00000331608 |
| ENSP00000222725 | ENSP00000358532 |
| ENSP00000222725 | ENSP00000362717 |
| ENSP00000222725 | ENSP00000363373 |
| ENSP00000222725 | ENSP00000378132 |
| ENSP00000222725 | ENSP00000381293 |
| ENSP00000222747 | ENSP00000367301 |
| ENSP00000222753 | ENSP00000240423 |
| ENSP00000222753 | ENSP00000318423 |
| ENSP00000222753 | ENSP00000326296 |
| ENSP00000222792 | ENSP00000236051 |
| ENSP00000222792 | ENSP00000253339 |
| ENSP00000222792 | ENSP00000256216 |
| ENSP00000222792 | ENSP00000260008 |
| ENSP00000222792 | ENSP00000262300 |
| ENSP00000222792 | ENSP00000264639 |
| ENSP00000222792 | ENSP00000267101 |
| ENSP00000222792 | ENSP00000309871 |
| ENSP00000222792 | ENSP00000311005 |
| ENSP00000222792 | ENSP00000315659 |
| ENSP00000222792 | ENSP00000316845 |
| ENSP00000222792 | ENSP00000318884 |
| ENSP00000222792 | ENSP00000322957 |
| ENSP00000222792 | ENSP00000327315 |
| ENSP00000222792 | ENSP00000333950 |
| ENSP00000222792 | ENSP00000339299 |
| ENSP00000222792 | ENSP00000348215 |
| ENSP00000222792 | ENSP00000349145 |



|                 |                 |
|-----------------|-----------------|
| ENSP00000222792 | ENSP00000354718 |
| ENSP00000222792 | ENSP00000361009 |
| ENSP00000222792 | ENSP00000366121 |
| ENSP00000222792 | ENSP00000376410 |
| ENSP00000222792 | ENSP00000382177 |
| ENSP00000222792 | ENSP00000391249 |
| ENSP00000222792 | ENSP00000397351 |
| ENSP00000222800 | ENSP00000248553 |
| ENSP00000222968 | ENSP00000330382 |
| ENSP00000222968 | ENSP00000341947 |
| ENSP00000222969 | ENSP00000225171 |
| ENSP00000222969 | ENSP00000227524 |
| ENSP00000222969 | ENSP00000232888 |
| ENSP00000222969 | ENSP00000258383 |
| ENSP00000222969 | ENSP00000261531 |
| ENSP00000222969 | ENSP00000262584 |
| ENSP00000222969 | ENSP00000264065 |
| ENSP00000222969 | ENSP00000264233 |
| ENSP00000222969 | ENSP00000268206 |
| ENSP00000222969 | ENSP00000268482 |
| ENSP00000222969 | ENSP00000276570 |
| ENSP00000222969 | ENSP00000282050 |
| ENSP00000222969 | ENSP00000286317 |
| ENSP00000222969 | ENSP00000295373 |
| ENSP00000222969 | ENSP00000295488 |
| ENSP00000222969 | ENSP00000296805 |
| ENSP00000222969 | ENSP00000298532 |
| ENSP00000222969 | ENSP00000301740 |
| ENSP00000222969 | ENSP00000301764 |
| ENSP00000222969 | ENSP00000303191 |
| ENSP00000222969 | ENSP00000304350 |
| ENSP00000222969 | ENSP00000304370 |
| ENSP00000222969 | ENSP00000305790 |
| ENSP00000222969 | ENSP00000312311 |
| ENSP00000222969 | ENSP00000313674 |
| ENSP00000222969 | ENSP00000315700 |
| ENSP00000222969 | ENSP00000316240 |
| ENSP00000222969 | ENSP00000318861 |
| ENSP00000222969 | ENSP00000326531 |
| ENSP00000222969 | ENSP00000327070 |
| ENSP00000222969 | ENSP00000328992 |
| ENSP00000222969 | ENSP00000331907 |
| ENSP00000222969 | ENSP00000334148 |
| ENSP00000222969 | ENSP00000339845 |
| ENSP00000222969 | ENSP00000343557 |
| ENSP00000222969 | ENSP00000343745 |

|                 |                 |
|-----------------|-----------------|
| ENSP00000222969 | ENSP00000346986 |
| ENSP00000222969 | ENSP00000351137 |
| ENSP00000222969 | ENSP00000354522 |
| ENSP00000222969 | ENSP00000355050 |
| ENSP00000222969 | ENSP00000356520 |
| ENSP00000222969 | ENSP00000359454 |
| ENSP00000222969 | ENSP00000360532 |
| ENSP00000222969 | ENSP00000362041 |
| ENSP00000222969 | ENSP00000362110 |
| ENSP00000222969 | ENSP00000362744 |
| ENSP00000222969 | ENSP00000366179 |
| ENSP00000222969 | ENSP00000366557 |
| ENSP00000222969 | ENSP00000368523 |
| ENSP00000222969 | ENSP00000371236 |
| ENSP00000222969 | ENSP00000371451 |
| ENSP00000222969 | ENSP00000373404 |
| ENSP00000222969 | ENSP00000376973 |
| ENSP00000222969 | ENSP00000379607 |
| ENSP00000222969 | ENSP00000387303 |
| ENSP00000222969 | ENSP00000392601 |
| ENSP00000222969 | ENSP00000393953 |
| ENSP00000222969 | ENSP00000416959 |
| ENSP00000222990 | ENSP00000233055 |
| ENSP00000222990 | ENSP00000243918 |
| ENSP00000222990 | ENSP00000245923 |
| ENSP00000222990 | ENSP00000251038 |
| ENSP00000222990 | ENSP00000265990 |
| ENSP00000222990 | ENSP00000267484 |
| ENSP00000222990 | ENSP00000269122 |
| ENSP00000222990 | ENSP00000281187 |
| ENSP00000222990 | ENSP00000299138 |
| ENSP00000222990 | ENSP00000307850 |
| ENSP00000222990 | ENSP00000314949 |
| ENSP00000222990 | ENSP00000337838 |
| ENSP00000222990 | ENSP00000344106 |
| ENSP00000222990 | ENSP00000358497 |
| ENSP00000222990 | ENSP00000359607 |
| ENSP00000222990 | ENSP00000365567 |
| ENSP00000223023 | ENSP00000225655 |
| ENSP00000223023 | ENSP00000234396 |
| ENSP00000223023 | ENSP00000242285 |
| ENSP00000223023 | ENSP00000252699 |
| ENSP00000223023 | ENSP00000252725 |
| ENSP00000223023 | ENSP00000253083 |
| ENSP00000223023 | ENSP00000259477 |
| ENSP00000223023 | ENSP00000261017 |

|                 |                 |
|-----------------|-----------------|
| ENSP00000223023 | ENSP00000261558 |
| ENSP00000223023 | ENSP00000262375 |
| ENSP00000223023 | ENSP00000263246 |
| ENSP00000223023 | ENSP00000264864 |
| ENSP00000223023 | ENSP00000269122 |
| ENSP00000223023 | ENSP00000276416 |
| ENSP00000223023 | ENSP00000277541 |
| ENSP00000223023 | ENSP00000284637 |
| ENSP00000223023 | ENSP00000294129 |
| ENSP00000223023 | ENSP00000295685 |
| ENSP00000223023 | ENSP00000300574 |
| ENSP00000223023 | ENSP00000301843 |
| ENSP00000223023 | ENSP00000303434 |
| ENSP00000223023 | ENSP00000307272 |
| ENSP00000223023 | ENSP00000309610 |
| ENSP00000223023 | ENSP00000309629 |
| ENSP00000223023 | ENSP00000314499 |
| ENSP00000223023 | ENSP00000315659 |
| ENSP00000223023 | ENSP00000320924 |
| ENSP00000223023 | ENSP00000326238 |
| ENSP00000223023 | ENSP00000333873 |
| ENSP00000223023 | ENSP00000333950 |
| ENSP00000223023 | ENSP00000334836 |
| ENSP00000223023 | ENSP00000340494 |
| ENSP00000223023 | ENSP00000343526 |
| ENSP00000223023 | ENSP00000343741 |
| ENSP00000223023 | ENSP00000344741 |
| ENSP00000223023 | ENSP00000345530 |
| ENSP00000223023 | ENSP00000348163 |
| ENSP00000223023 | ENSP00000348215 |
| ENSP00000223023 | ENSP00000348602 |
| ENSP00000223023 | ENSP00000349959 |
| ENSP00000223023 | ENSP00000352121 |
| ENSP00000223023 | ENSP00000352603 |
| ENSP00000223023 | ENSP00000352802 |
| ENSP00000223023 | ENSP00000358994 |
| ENSP00000223023 | ENSP00000360798 |
| ENSP00000223023 | ENSP00000366121 |
| ENSP00000223023 | ENSP00000366746 |
| ENSP00000223023 | ENSP00000368818 |
| ENSP00000223023 | ENSP00000370719 |
| ENSP00000223023 | ENSP00000378338 |
| ENSP00000223023 | ENSP00000379228 |
| ENSP00000223023 | ENSP00000379709 |
| ENSP00000223023 | ENSP00000380450 |
| ENSP00000223023 | ENSP00000380921 |

|                 |                 |
|-----------------|-----------------|
| ENSP00000223023 | ENSP00000382177 |
| ENSP00000223023 | ENSP00000386456 |
| ENSP00000223023 | ENSP00000386722 |
| ENSP00000223023 | ENSP00000407879 |
| ENSP00000223023 | ENSP00000408910 |
| ENSP00000223023 | ENSP00000413625 |
| ENSP00000223029 | ENSP00000227758 |
| ENSP00000223029 | ENSP00000231572 |
| ENSP00000223029 | ENSP00000232905 |
| ENSP00000223029 | ENSP00000254336 |
| ENSP00000223029 | ENSP00000259075 |
| ENSP00000223029 | ENSP00000262027 |
| ENSP00000223029 | ENSP00000263925 |
| ENSP00000223029 | ENSP00000264161 |
| ENSP00000223029 | ENSP00000268058 |
| ENSP00000223029 | ENSP00000281172 |
| ENSP00000223029 | ENSP00000282276 |
| ENSP00000223029 | ENSP00000296564 |
| ENSP00000223029 | ENSP00000300086 |
| ENSP00000223029 | ENSP00000307567 |
| ENSP00000223029 | ENSP00000318128 |
| ENSP00000223029 | ENSP00000325448 |
| ENSP00000223029 | ENSP00000355086 |
| ENSP00000223029 | ENSP00000355865 |
| ENSP00000223029 | ENSP00000355890 |
| ENSP00000223029 | ENSP00000357283 |
| ENSP00000223029 | ENSP00000364794 |
| ENSP00000223029 | ENSP00000364815 |
| ENSP00000223029 | ENSP00000369038 |
| ENSP00000223029 | ENSP00000370410 |
| ENSP00000223029 | ENSP00000379607 |
| ENSP00000223029 | ENSP00000401121 |
| ENSP00000223029 | ENSP00000403359 |
| ENSP00000223029 | ENSP00000415316 |
| ENSP00000223051 | ENSP00000296509 |
| ENSP00000223051 | ENSP00000338413 |
| ENSP00000223054 | ENSP00000223136 |
| ENSP00000223054 | ENSP00000262812 |
| ENSP00000223054 | ENSP00000324792 |
| ENSP00000223054 | ENSP00000330343 |
| ENSP00000223054 | ENSP00000336994 |
| ENSP00000223054 | ENSP00000353741 |
| ENSP00000223054 | ENSP00000368439 |
| ENSP00000223054 | ENSP00000392330 |
| ENSP00000223073 | ENSP00000226796 |
| ENSP00000223073 | ENSP00000230859 |

|                 |                 |
|-----------------|-----------------|
| ENSP00000223073 | ENSP00000234170 |
| ENSP00000223073 | ENSP00000236051 |
| ENSP00000223073 | ENSP00000252115 |
| ENSP00000223073 | ENSP00000253107 |
| ENSP00000223073 | ENSP00000254940 |
| ENSP00000223073 | ENSP00000257829 |
| ENSP00000223073 | ENSP00000259569 |
| ENSP00000223073 | ENSP00000261015 |
| ENSP00000223073 | ENSP00000261637 |
| ENSP00000223073 | ENSP00000262056 |
| ENSP00000223073 | ENSP00000267425 |
| ENSP00000223073 | ENSP00000268661 |
| ENSP00000223073 | ENSP00000278856 |
| ENSP00000223073 | ENSP00000298746 |
| ENSP00000223073 | ENSP00000302886 |
| ENSP00000223073 | ENSP00000305702 |
| ENSP00000223073 | ENSP00000310668 |
| ENSP00000223073 | ENSP00000314311 |
| ENSP00000223073 | ENSP00000314348 |
| ENSP00000223073 | ENSP00000317992 |
| ENSP00000223073 | ENSP00000320917 |
| ENSP00000223073 | ENSP00000321711 |
| ENSP00000223073 | ENSP00000322396 |
| ENSP00000223073 | ENSP00000323858 |
| ENSP00000223073 | ENSP00000328690 |
| ENSP00000223073 | ENSP00000329466 |
| ENSP00000223073 | ENSP00000331817 |
| ENSP00000223073 | ENSP00000338573 |
| ENSP00000223073 | ENSP00000338862 |
| ENSP00000223073 | ENSP00000339145 |
| ENSP00000223073 | ENSP00000339795 |
| ENSP00000223073 | ENSP00000346453 |
| ENSP00000223073 | ENSP00000346725 |
| ENSP00000223073 | ENSP00000350491 |
| ENSP00000223073 | ENSP00000353741 |
| ENSP00000223073 | ENSP00000354040 |
| ENSP00000223073 | ENSP00000354522 |
| ENSP00000223073 | ENSP00000355541 |
| ENSP00000223073 | ENSP00000358400 |
| ENSP00000223073 | ENSP00000358563 |
| ENSP00000223073 | ENSP00000358812 |
| ENSP00000223073 | ENSP00000359345 |
| ENSP00000223073 | ENSP00000359688 |
| ENSP00000223073 | ENSP00000360031 |
| ENSP00000223073 | ENSP00000360828 |
| ENSP00000223073 | ENSP00000361076 |

|                 |                 |
|-----------------|-----------------|
| ENSP00000223073 | ENSP00000361232 |
| ENSP00000223073 | ENSP00000366519 |
| ENSP00000223073 | ENSP00000368612 |
| ENSP00000223073 | ENSP00000370589 |
| ENSP00000223073 | ENSP00000372199 |
| ENSP00000223073 | ENSP00000379607 |
| ENSP00000223073 | ENSP00000380982 |
| ENSP00000223073 | ENSP00000382392 |
| ENSP00000223073 | ENSP00000389103 |
| ENSP00000223073 | ENSP00000402338 |
| ENSP00000223122 | ENSP00000304364 |
| ENSP00000223127 | ENSP00000253490 |
| ENSP00000223127 | ENSP00000272902 |
| ENSP00000223127 | ENSP00000365147 |
| ENSP00000223127 | ENSP00000379607 |
| ENSP00000223127 | ENSP00000410833 |
| ENSP00000223129 | ENSP00000234296 |
| ENSP00000223129 | ENSP00000243326 |
| ENSP00000223129 | ENSP00000254719 |
| ENSP00000223129 | ENSP00000265056 |
| ENSP00000223129 | ENSP00000296137 |
| ENSP00000223129 | ENSP00000314129 |
| ENSP00000223129 | ENSP00000318352 |
| ENSP00000223129 | ENSP00000322957 |
| ENSP00000223129 | ENSP00000334675 |
| ENSP00000223129 | ENSP00000337088 |
| ENSP00000223129 | ENSP00000338067 |
| ENSP00000223129 | ENSP00000347232 |
| ENSP00000223129 | ENSP00000350491 |
| ENSP00000223129 | ENSP00000351284 |
| ENSP00000223129 | ENSP00000354361 |
| ENSP00000223129 | ENSP00000363021 |
| ENSP00000223129 | ENSP00000368438 |
| ENSP00000223129 | ENSP00000379607 |
| ENSP00000223136 | ENSP00000235329 |
| ENSP00000223136 | ENSP00000254442 |
| ENSP00000223136 | ENSP00000262715 |
| ENSP00000223136 | ENSP00000263150 |
| ENSP00000223136 | ENSP00000285873 |
| ENSP00000223136 | ENSP00000300589 |
| ENSP00000223136 | ENSP00000300688 |
| ENSP00000223136 | ENSP00000311344 |
| ENSP00000223136 | ENSP00000338533 |
| ENSP00000223136 | ENSP00000345656 |
| ENSP00000223136 | ENSP00000349887 |
| ENSP00000223136 | ENSP00000351813 |

|                 |                 |
|-----------------|-----------------|
| ENSP00000223136 | ENSP00000352820 |
| ENSP00000223136 | ENSP00000353059 |
| ENSP00000223136 | ENSP00000358312 |
| ENSP00000223136 | ENSP00000362688 |
| ENSP00000223136 | ENSP00000366953 |
| ENSP00000223136 | ENSP00000371888 |
| ENSP00000223136 | ENSP00000387262 |
| ENSP00000223136 | ENSP00000392330 |
| ENSP00000223167 | ENSP00000295685 |
| ENSP00000223167 | ENSP00000341838 |
| ENSP00000223190 | ENSP00000278070 |
| ENSP00000223190 | ENSP00000285599 |
| ENSP00000223190 | ENSP00000305422 |
| ENSP00000223190 | ENSP00000355759 |
| ENSP00000223210 | ENSP00000381003 |
| ENSP00000223215 | ENSP00000278937 |
| ENSP00000223215 | ENSP00000331201 |
| ENSP00000223215 | ENSP00000348762 |
| ENSP00000223215 | ENSP00000354560 |
| ENSP00000223273 | ENSP00000274030 |
| ENSP00000223273 | ENSP00000279147 |
| ENSP00000223273 | ENSP00000296577 |
| ENSP00000223273 | ENSP00000307077 |
| ENSP00000223273 | ENSP00000376946 |
| ENSP00000223324 | ENSP00000225969 |
| ENSP00000223324 | ENSP00000251038 |
| ENSP00000223324 | ENSP00000256404 |
| ENSP00000223324 | ENSP00000269143 |
| ENSP00000223324 | ENSP00000301585 |
| ENSP00000223324 | ENSP00000308275 |
| ENSP00000223324 | ENSP00000333401 |
| ENSP00000223336 | ENSP00000261070 |
| ENSP00000223336 | ENSP00000355572 |
| ENSP00000223369 | ENSP00000225567 |
| ENSP00000223369 | ENSP00000225724 |
| ENSP00000223369 | ENSP00000229314 |
| ENSP00000223369 | ENSP00000231668 |
| ENSP00000223369 | ENSP00000236192 |
| ENSP00000223369 | ENSP00000246166 |
| ENSP00000223369 | ENSP00000249647 |
| ENSP00000223369 | ENSP00000251038 |
| ENSP00000223369 | ENSP00000257700 |
| ENSP00000223369 | ENSP00000258301 |
| ENSP00000223369 | ENSP00000258654 |
| ENSP00000223369 | ENSP00000259400 |
| ENSP00000223369 | ENSP00000260818 |

|                 |                 |
|-----------------|-----------------|
| ENSP00000223369 | ENSP00000261776 |
| ENSP00000223369 | ENSP00000263116 |
| ENSP00000223369 | ENSP00000263897 |
| ENSP00000223369 | ENSP00000264157 |
| ENSP00000223369 | ENSP00000265857 |
| ENSP00000223369 | ENSP00000272322 |
| ENSP00000223369 | ENSP00000286448 |
| ENSP00000223369 | ENSP00000294179 |
| ENSP00000223369 | ENSP00000305255 |
| ENSP00000223369 | ENSP00000305647 |
| ENSP00000223369 | ENSP00000305810 |
| ENSP00000223369 | ENSP00000309163 |
| ENSP00000223369 | ENSP00000309457 |
| ENSP00000223369 | ENSP00000310521 |
| ENSP00000223369 | ENSP00000317714 |
| ENSP00000223369 | ENSP00000323377 |
| ENSP00000223369 | ENSP00000324628 |
| ENSP00000223369 | ENSP00000325002 |
| ENSP00000223369 | ENSP00000326534 |
| ENSP00000223369 | ENSP00000327650 |
| ENSP00000223369 | ENSP00000334044 |
| ENSP00000223369 | ENSP00000339484 |
| ENSP00000223369 | ENSP00000344456 |
| ENSP00000223369 | ENSP00000348215 |
| ENSP00000223369 | ENSP00000349887 |
| ENSP00000223369 | ENSP00000353073 |
| ENSP00000223369 | ENSP00000355721 |
| ENSP00000223369 | ENSP00000357887 |
| ENSP00000223369 | ENSP00000360183 |
| ENSP00000223369 | ENSP00000361699 |
| ENSP00000223369 | ENSP00000366225 |
| ENSP00000223369 | ENSP00000366249 |
| ENSP00000223369 | ENSP00000368699 |
| ENSP00000223369 | ENSP00000369810 |
| ENSP00000223369 | ENSP00000373039 |
| ENSP00000223369 | ENSP00000374529 |
| ENSP00000223369 | ENSP00000380450 |
| ENSP00000223369 | ENSP00000381293 |
| ENSP00000223369 | ENSP00000390783 |
| ENSP00000223369 | ENSP00000396152 |
| ENSP00000223369 | ENSP00000397441 |
| ENSP00000223369 | ENSP00000402240 |
| ENSP00000223369 | ENSP00000403397 |
| ENSP00000223369 | ENSP00000410416 |
| ENSP00000223369 | ENSP00000417748 |
| ENSP00000223369 | ENSP00000418661 |



|                 |                 |
|-----------------|-----------------|
| ENSP00000223500 | ENSP00000242285 |
| ENSP00000223500 | ENSP00000251038 |
| ENSP00000223500 | ENSP00000260956 |
| ENSP00000223500 | ENSP00000262995 |
| ENSP00000223500 | ENSP00000263795 |
| ENSP00000223500 | ENSP00000263856 |
| ENSP00000223500 | ENSP00000272444 |
| ENSP00000223500 | ENSP00000273398 |
| ENSP00000223500 | ENSP00000283351 |
| ENSP00000223500 | ENSP00000302239 |
| ENSP00000223500 | ENSP00000309830 |
| ENSP00000223500 | ENSP00000310440 |
| ENSP00000223500 | ENSP00000310596 |
| ENSP00000223500 | ENSP00000327077 |
| ENSP00000223500 | ENSP00000330408 |
| ENSP00000223500 | ENSP00000343742 |
| ENSP00000223500 | ENSP00000345216 |
| ENSP00000223500 | ENSP00000348081 |
| ENSP00000223500 | ENSP00000352738 |
| ENSP00000223500 | ENSP00000354522 |
| ENSP00000223500 | ENSP00000356602 |
| ENSP00000223500 | ENSP00000361202 |
| ENSP00000223500 | ENSP00000365016 |
| ENSP00000223500 | ENSP00000368699 |
| ENSP00000223500 | ENSP00000378368 |
| ENSP00000223500 | ENSP00000383431 |
| ENSP00000223641 | ENSP00000225430 |
| ENSP00000223641 | ENSP00000230449 |
| ENSP00000223641 | ENSP00000233242 |
| ENSP00000223641 | ENSP00000237530 |
| ENSP00000223641 | ENSP00000239944 |
| ENSP00000223641 | ENSP00000243253 |
| ENSP00000223641 | ENSP00000244763 |
| ENSP00000223641 | ENSP00000245923 |
| ENSP00000223641 | ENSP00000248139 |
| ENSP00000223641 | ENSP00000248566 |
| ENSP00000223641 | ENSP00000250498 |
| ENSP00000223641 | ENSP00000253861 |
| ENSP00000223641 | ENSP00000259469 |
| ENSP00000223641 | ENSP00000262213 |
| ENSP00000223641 | ENSP00000265100 |
| ENSP00000223641 | ENSP00000267484 |
| ENSP00000223641 | ENSP00000272427 |
| ENSP00000223641 | ENSP00000282074 |
| ENSP00000223641 | ENSP00000290649 |
| ENSP00000223641 | ENSP00000295770 |

|                 |                 |
|-----------------|-----------------|
| ENSP00000223641 | ENSP00000296255 |
| ENSP00000223641 | ENSP00000305892 |
| ENSP00000223641 | ENSP00000311430 |
| ENSP00000223641 | ENSP00000323377 |
| ENSP00000223641 | ENSP00000327716 |
| ENSP00000223641 | ENSP00000332326 |
| ENSP00000223641 | ENSP00000337688 |
| ENSP00000223641 | ENSP00000337838 |
| ENSP00000223641 | ENSP00000341538 |
| ENSP00000223641 | ENSP00000342181 |
| ENSP00000223641 | ENSP00000344106 |
| ENSP00000223641 | ENSP00000349887 |
| ENSP00000223641 | ENSP00000357998 |
| ENSP00000223641 | ENSP00000359000 |
| ENSP00000223641 | ENSP00000364188 |
| ENSP00000223641 | ENSP00000365131 |
| ENSP00000223641 | ENSP00000365630 |
| ENSP00000223641 | ENSP00000368959 |
| ENSP00000223641 | ENSP00000369409 |
| ENSP00000223641 | ENSP00000386717 |
| ENSP00000223641 | ENSP00000389103 |
| ENSP00000223641 | ENSP00000389934 |
| ENSP00000223641 | ENSP00000392330 |
| ENSP00000223795 | ENSP00000336762 |
| ENSP00000223864 | ENSP00000339328 |
| ENSP00000224073 | ENSP00000248566 |
| ENSP00000224073 | ENSP00000251038 |
| ENSP00000224073 | ENSP00000264335 |
| ENSP00000224073 | ENSP00000276072 |
| ENSP00000224073 | ENSP00000287598 |
| ENSP00000224073 | ENSP00000287820 |
| ENSP00000224073 | ENSP00000291688 |
| ENSP00000224073 | ENSP00000302530 |
| ENSP00000224073 | ENSP00000306245 |
| ENSP00000224073 | ENSP00000311005 |
| ENSP00000224073 | ENSP00000356331 |
| ENSP00000224073 | ENSP00000366607 |
| ENSP00000224073 | ENSP00000402338 |
| ENSP00000224073 | ENSP00000414187 |
| ENSP00000224140 | ENSP00000230050 |
| ENSP00000224140 | ENSP00000247815 |
| ENSP00000224140 | ENSP00000251038 |
| ENSP00000224140 | ENSP00000252115 |
| ENSP00000224140 | ENSP00000254037 |
| ENSP00000224140 | ENSP00000254719 |
| ENSP00000224140 | ENSP00000261531 |

|                 |                 |
|-----------------|-----------------|
| ENSP00000224140 | ENSP00000263274 |
| ENSP00000224140 | ENSP00000263360 |
| ENSP00000224140 | ENSP00000264883 |
| ENSP00000224140 | ENSP00000264951 |
| ENSP00000224140 | ENSP00000265462 |
| ENSP00000224140 | ENSP00000268043 |
| ENSP00000224140 | ENSP00000268616 |
| ENSP00000224140 | ENSP00000269499 |
| ENSP00000224140 | ENSP00000286835 |
| ENSP00000224140 | ENSP00000287038 |
| ENSP00000224140 | ENSP00000295897 |
| ENSP00000224140 | ENSP00000296328 |
| ENSP00000224140 | ENSP00000296490 |
| ENSP00000224140 | ENSP00000298139 |
| ENSP00000224140 | ENSP00000299601 |
| ENSP00000224140 | ENSP00000300648 |
| ENSP00000224140 | ENSP00000307525 |
| ENSP00000224140 | ENSP00000307786 |
| ENSP00000224140 | ENSP00000307853 |
| ENSP00000224140 | ENSP00000311873 |
| ENSP00000224140 | ENSP00000314348 |
| ENSP00000224140 | ENSP00000314949 |
| ENSP00000224140 | ENSP00000317636 |
| ENSP00000224140 | ENSP00000318195 |
| ENSP00000224140 | ENSP00000325448 |
| ENSP00000224140 | ENSP00000325863 |
| ENSP00000224140 | ENSP00000326806 |
| ENSP00000224140 | ENSP00000331310 |
| ENSP00000224140 | ENSP00000331817 |
| ENSP00000224140 | ENSP00000337839 |
| ENSP00000224140 | ENSP00000339845 |
| ENSP00000224140 | ENSP00000341243 |
| ENSP00000224140 | ENSP00000343745 |
| ENSP00000224140 | ENSP00000346015 |
| ENSP00000224140 | ENSP00000347232 |
| ENSP00000224140 | ENSP00000347978 |
| ENSP00000224140 | ENSP00000349393 |
| ENSP00000224140 | ENSP00000351284 |
| ENSP00000224140 | ENSP00000356146 |
| ENSP00000224140 | ENSP00000360532 |
| ENSP00000224140 | ENSP00000363021 |
| ENSP00000224140 | ENSP00000364289 |
| ENSP00000224140 | ENSP00000366135 |
| ENSP00000224140 | ENSP00000366843 |
| ENSP00000224140 | ENSP00000369335 |
| ENSP00000224140 | ENSP00000370150 |

|                 |                 |
|-----------------|-----------------|
| ENSP00000224140 | ENSP00000377527 |
| ENSP00000224140 | ENSP00000379933 |
| ENSP00000224652 | ENSP00000256474 |
| ENSP00000224652 | ENSP00000321636 |
| ENSP00000224652 | ENSP00000341743 |
| ENSP00000224652 | ENSP00000356405 |
| ENSP00000224652 | ENSP00000360286 |
| ENSP00000224652 | ENSP00000369757 |
| ENSP00000224652 | ENSP00000396704 |
| ENSP00000224756 | ENSP00000259895 |
| ENSP00000224756 | ENSP00000265963 |
| ENSP00000224756 | ENSP00000326514 |
| ENSP00000224756 | ENSP00000362441 |
| ENSP00000224862 | ENSP00000225504 |
| ENSP00000224862 | ENSP00000231487 |
| ENSP00000224862 | ENSP00000232501 |
| ENSP00000224862 | ENSP00000284811 |
| ENSP00000224862 | ENSP00000285021 |
| ENSP00000224862 | ENSP00000288985 |
| ENSP00000224862 | ENSP00000334675 |
| ENSP00000224862 | ENSP00000341243 |
| ENSP00000224862 | ENSP00000345530 |
| ENSP00000224862 | ENSP00000348089 |
| ENSP00000224862 | ENSP00000350708 |
| ENSP00000224862 | ENSP00000360621 |
| ENSP00000224862 | ENSP00000364270 |
| ENSP00000224862 | ENSP00000379228 |
| ENSP00000224950 | ENSP00000234420 |
| ENSP00000224950 | ENSP00000251871 |
| ENSP00000224950 | ENSP00000256379 |
| ENSP00000224950 | ENSP00000256996 |
| ENSP00000224950 | ENSP00000258648 |
| ENSP00000224950 | ENSP00000260383 |
| ENSP00000224950 | ENSP00000261424 |
| ENSP00000224950 | ENSP00000261881 |
| ENSP00000224950 | ENSP00000263043 |
| ENSP00000224950 | ENSP00000263795 |
| ENSP00000224950 | ENSP00000264926 |
| ENSP00000224950 | ENSP00000268711 |
| ENSP00000224950 | ENSP00000290663 |
| ENSP00000224950 | ENSP00000292035 |
| ENSP00000224950 | ENSP00000297347 |
| ENSP00000224950 | ENSP00000300651 |
| ENSP00000224950 | ENSP00000304370 |
| ENSP00000224950 | ENSP00000309572 |
| ENSP00000224950 | ENSP00000313171 |

|                 |                 |
|-----------------|-----------------|
| ENSP00000224950 | ENSP00000313759 |
| ENSP00000224950 | ENSP00000314949 |
| ENSP00000224950 | ENSP00000323720 |
| ENSP00000224950 | ENSP00000325612 |
| ENSP00000224950 | ENSP00000326767 |
| ENSP00000224950 | ENSP00000334148 |
| ENSP00000224950 | ENSP00000348610 |
| ENSP00000224950 | ENSP00000350249 |
| ENSP00000224950 | ENSP00000355759 |
| ENSP00000224950 | ENSP00000357047 |
| ENSP00000224950 | ENSP00000363193 |
| ENSP00000224950 | ENSP00000371419 |
| ENSP00000225171 | ENSP00000261531 |
| ENSP00000225171 | ENSP00000270538 |
| ENSP00000225171 | ENSP00000294053 |
| ENSP00000225171 | ENSP00000304350 |
| ENSP00000225171 | ENSP00000307525 |
| ENSP00000225171 | ENSP00000314499 |
| ENSP00000225171 | ENSP00000335321 |
| ENSP00000225171 | ENSP00000351137 |
| ENSP00000225171 | ENSP00000357998 |
| ENSP00000225171 | ENSP00000360532 |
| ENSP00000225171 | ENSP00000362110 |
| ENSP00000225171 | ENSP00000368565 |
| ENSP00000225298 | ENSP00000226796 |
| ENSP00000225298 | ENSP00000234677 |
| ENSP00000225298 | ENSP00000244230 |
| ENSP00000225298 | ENSP00000245539 |
| ENSP00000225298 | ENSP00000256398 |
| ENSP00000225298 | ENSP00000258455 |
| ENSP00000225298 | ENSP00000260257 |
| ENSP00000225298 | ENSP00000261531 |
| ENSP00000225298 | ENSP00000261601 |
| ENSP00000225298 | ENSP00000261708 |
| ENSP00000225298 | ENSP00000263657 |
| ENSP00000225298 | ENSP00000267425 |
| ENSP00000225298 | ENSP00000291576 |
| ENSP00000225298 | ENSP00000296792 |
| ENSP00000225298 | ENSP00000297990 |
| ENSP00000225298 | ENSP00000298292 |
| ENSP00000225298 | ENSP00000308179 |
| ENSP00000225298 | ENSP00000310590 |
| ENSP00000225298 | ENSP00000314193 |
| ENSP00000225298 | ENSP00000326981 |
| ENSP00000225298 | ENSP00000327179 |
| ENSP00000225298 | ENSP00000328854 |

|                 |                 |
|-----------------|-----------------|
| ENSP00000225298 | ENSP00000329466 |
| ENSP00000225298 | ENSP00000339095 |
| ENSP00000225298 | ENSP00000339145 |
| ENSP00000225298 | ENSP00000353246 |
| ENSP00000225298 | ENSP00000354040 |
| ENSP00000225298 | ENSP00000355541 |
| ENSP00000225298 | ENSP00000358812 |
| ENSP00000225298 | ENSP00000362105 |
| ENSP00000225298 | ENSP00000370589 |
| ENSP00000225298 | ENSP00000377944 |
| ENSP00000225298 | ENSP00000379607 |
| ENSP00000225298 | ENSP00000386134 |
| ENSP00000225388 | ENSP00000251968 |
| ENSP00000225388 | ENSP00000329466 |
| ENSP00000225388 | ENSP00000330343 |
| ENSP00000225388 | ENSP00000352738 |
| ENSP00000225430 | ENSP00000226796 |
| ENSP00000225430 | ENSP00000230050 |
| ENSP00000225430 | ENSP00000243253 |
| ENSP00000225430 | ENSP00000245539 |
| ENSP00000225430 | ENSP00000252543 |
| ENSP00000225430 | ENSP00000253099 |
| ENSP00000225430 | ENSP00000253788 |
| ENSP00000225430 | ENSP00000257879 |
| ENSP00000225430 | ENSP00000258455 |
| ENSP00000225430 | ENSP00000259469 |
| ENSP00000225430 | ENSP00000260102 |
| ENSP00000225430 | ENSP00000260443 |
| ENSP00000225430 | ENSP00000261531 |
| ENSP00000225430 | ENSP00000262584 |
| ENSP00000225430 | ENSP00000262966 |
| ENSP00000225430 | ENSP00000263360 |
| ENSP00000225430 | ENSP00000264995 |
| ENSP00000225430 | ENSP00000265100 |
| ENSP00000225430 | ENSP00000268661 |
| ENSP00000225430 | ENSP00000270625 |
| ENSP00000225430 | ENSP00000272418 |
| ENSP00000225430 | ENSP00000274242 |
| ENSP00000225430 | ENSP00000274606 |
| ENSP00000225430 | ENSP00000276603 |
| ENSP00000225430 | ENSP00000277541 |
| ENSP00000225430 | ENSP00000278572 |
| ENSP00000225430 | ENSP00000287038 |
| ENSP00000225430 | ENSP00000294189 |
| ENSP00000225430 | ENSP00000297338 |
| ENSP00000225430 | ENSP00000298283 |

|                 |                 |
|-----------------|-----------------|
| ENSP00000225430 | ENSP00000299335 |
| ENSP00000225430 | ENSP00000300151 |
| ENSP00000225430 | ENSP00000306548 |
| ENSP00000225430 | ENSP00000307889 |
| ENSP00000225430 | ENSP00000308897 |
| ENSP00000225430 | ENSP00000309334 |
| ENSP00000225430 | ENSP00000309830 |
| ENSP00000225430 | ENSP00000310040 |
| ENSP00000225430 | ENSP00000311028 |
| ENSP00000225430 | ENSP00000311430 |
| ENSP00000225430 | ENSP00000313691 |
| ENSP00000225430 | ENSP00000315693 |
| ENSP00000225430 | ENSP00000317376 |
| ENSP00000225430 | ENSP00000322419 |
| ENSP00000225430 | ENSP00000329466 |
| ENSP00000225430 | ENSP00000339095 |
| ENSP00000225430 | ENSP00000339795 |
| ENSP00000225430 | ENSP00000341538 |
| ENSP00000225430 | ENSP00000341885 |
| ENSP00000225430 | ENSP00000343392 |
| ENSP00000225430 | ENSP00000345156 |
| ENSP00000225430 | ENSP00000346015 |
| ENSP00000225430 | ENSP00000346022 |
| ENSP00000225430 | ENSP00000346027 |
| ENSP00000225430 | ENSP00000346037 |
| ENSP00000225430 | ENSP00000346050 |
| ENSP00000225430 | ENSP00000346088 |
| ENSP00000225430 | ENSP00000346725 |
| ENSP00000225430 | ENSP00000347978 |
| ENSP00000225430 | ENSP00000354525 |
| ENSP00000225430 | ENSP00000354739 |
| ENSP00000225430 | ENSP00000358831 |
| ENSP00000225430 | ENSP00000359345 |
| ENSP00000225430 | ENSP00000360286 |
| ENSP00000225430 | ENSP00000361076 |
| ENSP00000225430 | ENSP00000361800 |
| ENSP00000225430 | ENSP00000362576 |
| ENSP00000225430 | ENSP00000363018 |
| ENSP00000225430 | ENSP00000363559 |
| ENSP00000225430 | ENSP00000363676 |
| ENSP00000225430 | ENSP00000364320 |
| ENSP00000225430 | ENSP00000369757 |
| ENSP00000225430 | ENSP00000373404 |
| ENSP00000225430 | ENSP00000375730 |
| ENSP00000225430 | ENSP00000377640 |
| ENSP00000225430 | ENSP00000377865 |

|                 |                 |
|-----------------|-----------------|
| ENSP00000225430 | ENSP00000378160 |
| ENSP00000225430 | ENSP00000379607 |
| ENSP00000225430 | ENSP00000380156 |
| ENSP00000225430 | ENSP00000386717 |
| ENSP00000225430 | ENSP00000389103 |
| ENSP00000225430 | ENSP00000391723 |
| ENSP00000225430 | ENSP00000393393 |
| ENSP00000225430 | ENSP00000402338 |
| ENSP00000225430 | ENSP00000413625 |
| ENSP00000225430 | ENSP00000414321 |
| ENSP00000225430 | ENSP00000418734 |
| ENSP00000225504 | ENSP00000229179 |
| ENSP00000225504 | ENSP00000229971 |
| ENSP00000225504 | ENSP00000234827 |
| ENSP00000225504 | ENSP00000247219 |
| ENSP00000225504 | ENSP00000247970 |
| ENSP00000225504 | ENSP00000247977 |
| ENSP00000225504 | ENSP00000251038 |
| ENSP00000225504 | ENSP00000252445 |
| ENSP00000225504 | ENSP00000262173 |
| ENSP00000225504 | ENSP00000263208 |
| ENSP00000225504 | ENSP00000263390 |
| ENSP00000225504 | ENSP00000263736 |
| ENSP00000225504 | ENSP00000263857 |
| ENSP00000225504 | ENSP00000264515 |
| ENSP00000225504 | ENSP00000265990 |
| ENSP00000225504 | ENSP00000272252 |
| ENSP00000225504 | ENSP00000272444 |
| ENSP00000225504 | ENSP00000272645 |
| ENSP00000225504 | ENSP00000278412 |
| ENSP00000225504 | ENSP00000288985 |
| ENSP00000225504 | ENSP00000291386 |
| ENSP00000225504 | ENSP00000293860 |
| ENSP00000225504 | ENSP00000295321 |
| ENSP00000225504 | ENSP00000296328 |
| ENSP00000225504 | ENSP00000299543 |
| ENSP00000225504 | ENSP00000299601 |
| ENSP00000225504 | ENSP00000301788 |
| ENSP00000225504 | ENSP00000302478 |
| ENSP00000225504 | ENSP00000304593 |
| ENSP00000225504 | ENSP00000312735 |
| ENSP00000225504 | ENSP00000314949 |
| ENSP00000225504 | ENSP00000318674 |
| ENSP00000225504 | ENSP00000319104 |
| ENSP00000225504 | ENSP00000321386 |
| ENSP00000225504 | ENSP00000321927 |



|                 |                 |
|-----------------|-----------------|
| ENSP00000225504 | ENSP00000324124 |
| ENSP00000225504 | ENSP00000325677 |
| ENSP00000225504 | ENSP00000330098 |
| ENSP00000225504 | ENSP00000331111 |
| ENSP00000225504 | ENSP00000334675 |
| ENSP00000225504 | ENSP00000336868 |
| ENSP00000225504 | ENSP00000340823 |
| ENSP00000225504 | ENSP00000342889 |
| ENSP00000225504 | ENSP00000347168 |
| ENSP00000225504 | ENSP00000347345 |
| ENSP00000225504 | ENSP00000347836 |
| ENSP00000225504 | ENSP00000348089 |
| ENSP00000225504 | ENSP00000350767 |
| ENSP00000225504 | ENSP00000352738 |
| ENSP00000225504 | ENSP00000354977 |
| ENSP00000225504 | ENSP00000356405 |
| ENSP00000225504 | ENSP00000357887 |
| ENSP00000225504 | ENSP00000357907 |
| ENSP00000225504 | ENSP00000358478 |
| ENSP00000225504 | ENSP00000358497 |
| ENSP00000225504 | ENSP00000360116 |
| ENSP00000225504 | ENSP00000361465 |
| ENSP00000225504 | ENSP00000362352 |
| ENSP00000225504 | ENSP00000364270 |
| ENSP00000225504 | ENSP00000366135 |
| ENSP00000225504 | ENSP00000366271 |
| ENSP00000225504 | ENSP00000366974 |
| ENSP00000225504 | ENSP00000367029 |
| ENSP00000225504 | ENSP00000367034 |
| ENSP00000225504 | ENSP00000371475 |
| ENSP00000225504 | ENSP00000374280 |
| ENSP00000225504 | ENSP00000377969 |
| ENSP00000225504 | ENSP00000381031 |
| ENSP00000225504 | ENSP00000383503 |
| ENSP00000225504 | ENSP00000397259 |
| ENSP00000225504 | ENSP00000397636 |
| ENSP00000225504 | ENSP00000403852 |
| ENSP00000225504 | ENSP00000405636 |
| ENSP00000225504 | ENSP00000406293 |
| ENSP00000225504 | ENSP00000410530 |
| ENSP00000225504 | ENSP00000410954 |
| ENSP00000225504 | ENSP00000414110 |
| ENSP00000225504 | ENSP00000416599 |
| ENSP00000225504 | ENSP00000418111 |
| ENSP00000225519 | ENSP00000264029 |
| ENSP00000225519 | ENSP00000264705 |

|                 |                 |
|-----------------|-----------------|
| ENSP00000225519 | ENSP00000330408 |
| ENSP00000225519 | ENSP00000360268 |
| ENSP00000225519 | ENSP00000417281 |
| ENSP00000225567 | ENSP00000225724 |
| ENSP00000225567 | ENSP00000231668 |
| ENSP00000225567 | ENSP00000236192 |
| ENSP00000225567 | ENSP00000238831 |
| ENSP00000225567 | ENSP00000249647 |
| ENSP00000225567 | ENSP00000249923 |
| ENSP00000225567 | ENSP00000251038 |
| ENSP00000225567 | ENSP00000258301 |
| ENSP00000225567 | ENSP00000259400 |
| ENSP00000225567 | ENSP00000262544 |
| ENSP00000225567 | ENSP00000262812 |
| ENSP00000225567 | ENSP00000263897 |
| ENSP00000225567 | ENSP00000264028 |
| ENSP00000225567 | ENSP00000264157 |
| ENSP00000225567 | ENSP00000265175 |
| ENSP00000225567 | ENSP00000265857 |
| ENSP00000225567 | ENSP00000286448 |
| ENSP00000225567 | ENSP00000294179 |
| ENSP00000225567 | ENSP00000302783 |
| ENSP00000225567 | ENSP00000305255 |
| ENSP00000225567 | ENSP00000305647 |
| ENSP00000225567 | ENSP00000305810 |
| ENSP00000225567 | ENSP00000310521 |
| ENSP00000225567 | ENSP00000317714 |
| ENSP00000225567 | ENSP00000324628 |
| ENSP00000225567 | ENSP00000325002 |
| ENSP00000225567 | ENSP00000327309 |
| ENSP00000225567 | ENSP00000327650 |
| ENSP00000225567 | ENSP00000328079 |
| ENSP00000225567 | ENSP00000329419 |
| ENSP00000225567 | ENSP00000353564 |
| ENSP00000225567 | ENSP00000355721 |
| ENSP00000225567 | ENSP00000357048 |
| ENSP00000225567 | ENSP00000360183 |
| ENSP00000225567 | ENSP00000362399 |
| ENSP00000225567 | ENSP00000374529 |
| ENSP00000225567 | ENSP00000381293 |
| ENSP00000225567 | ENSP00000390783 |
| ENSP00000225567 | ENSP00000397441 |
| ENSP00000225573 | ENSP00000251038 |
| ENSP00000225573 | ENSP00000267064 |
| ENSP00000225576 | ENSP00000253031 |
| ENSP00000225576 | ENSP00000263116 |

|                 |                 |
|-----------------|-----------------|
| ENSP00000225576 | ENSP00000342148 |
| ENSP00000225576 | ENSP00000367615 |
| ENSP00000225655 | ENSP00000229922 |
| ENSP00000225655 | ENSP00000252699 |
| ENSP00000225655 | ENSP00000252725 |
| ENSP00000225655 | ENSP00000253861 |
| ENSP00000225655 | ENSP00000260008 |
| ENSP00000225655 | ENSP00000262300 |
| ENSP00000225655 | ENSP00000269122 |
| ENSP00000225655 | ENSP00000289373 |
| ENSP00000225655 | ENSP00000292385 |
| ENSP00000225655 | ENSP00000302790 |
| ENSP00000225655 | ENSP00000305958 |
| ENSP00000225655 | ENSP00000309629 |
| ENSP00000225655 | ENSP00000318884 |
| ENSP00000225655 | ENSP00000320924 |
| ENSP00000225655 | ENSP00000325402 |
| ENSP00000225655 | ENSP00000326238 |
| ENSP00000225655 | ENSP00000329219 |
| ENSP00000225655 | ENSP00000333950 |
| ENSP00000225655 | ENSP00000336702 |
| ENSP00000225655 | ENSP00000346791 |
| ENSP00000225655 | ENSP00000351284 |
| ENSP00000225655 | ENSP00000352425 |
| ENSP00000225655 | ENSP00000355809 |
| ENSP00000225655 | ENSP00000361467 |
| ENSP00000225655 | ENSP00000362413 |
| ENSP00000225655 | ENSP00000376410 |
| ENSP00000225655 | ENSP00000380129 |
| ENSP00000225655 | ENSP00000383623 |
| ENSP00000225655 | ENSP00000397351 |
| ENSP00000225655 | ENSP00000402084 |
| ENSP00000225688 | ENSP00000320758 |
| ENSP00000225688 | ENSP00000341551 |
| ENSP00000225688 | ENSP00000341957 |
| ENSP00000225688 | ENSP00000355133 |
| ENSP00000225688 | ENSP00000369075 |
| ENSP00000225698 | ENSP00000225983 |
| ENSP00000225698 | ENSP00000240055 |
| ENSP00000225698 | ENSP00000240316 |
| ENSP00000225698 | ENSP00000257572 |
| ENSP00000225698 | ENSP00000261168 |
| ENSP00000225698 | ENSP00000262995 |
| ENSP00000225698 | ENSP00000275015 |
| ENSP00000225698 | ENSP00000295025 |
| ENSP00000225698 | ENSP00000298097 |

|                 |                 |
|-----------------|-----------------|
| ENSP00000225698 | ENSP00000301329 |
| ENSP00000225698 | ENSP00000301585 |
| ENSP00000225698 | ENSP00000325562 |
| ENSP00000225698 | ENSP00000333568 |
| ENSP00000225698 | ENSP00000334538 |
| ENSP00000225698 | ENSP00000355865 |
| ENSP00000225698 | ENSP00000364398 |
| ENSP00000225698 | ENSP00000365175 |
| ENSP00000225698 | ENSP00000365435 |
| ENSP00000225698 | ENSP00000379607 |
| ENSP00000225698 | ENSP00000379888 |
| ENSP00000225698 | ENSP00000387477 |
| ENSP00000225698 | ENSP00000398597 |
| ENSP00000225698 | ENSP00000415363 |
| ENSP00000225719 | ENSP00000276893 |
| ENSP00000225724 | ENSP00000231668 |
| ENSP00000225724 | ENSP00000236192 |
| ENSP00000225724 | ENSP00000243918 |
| ENSP00000225724 | ENSP00000253339 |
| ENSP00000225724 | ENSP00000258301 |
| ENSP00000225724 | ENSP00000258418 |
| ENSP00000225724 | ENSP00000258654 |
| ENSP00000225724 | ENSP00000259400 |
| ENSP00000225724 | ENSP00000263116 |
| ENSP00000225724 | ENSP00000263379 |
| ENSP00000225724 | ENSP00000263897 |
| ENSP00000225724 | ENSP00000264157 |
| ENSP00000225724 | ENSP00000265175 |
| ENSP00000225724 | ENSP00000271375 |
| ENSP00000225724 | ENSP00000286448 |
| ENSP00000225724 | ENSP00000292535 |
| ENSP00000225724 | ENSP00000294179 |
| ENSP00000225724 | ENSP00000305255 |
| ENSP00000225724 | ENSP00000305459 |
| ENSP00000225724 | ENSP00000305647 |
| ENSP00000225724 | ENSP00000305810 |
| ENSP00000225724 | ENSP00000308496 |
| ENSP00000225724 | ENSP00000311825 |
| ENSP00000225724 | ENSP00000317714 |
| ENSP00000225724 | ENSP00000324628 |
| ENSP00000225724 | ENSP00000325369 |
| ENSP00000225724 | ENSP00000326869 |
| ENSP00000225724 | ENSP00000336724 |
| ENSP00000225724 | ENSP00000344055 |
| ENSP00000225724 | ENSP00000344223 |
| ENSP00000225724 | ENSP00000346139 |

|                 |                 |
|-----------------|-----------------|
| ENSP00000225724 | ENSP00000356405 |
| ENSP00000225724 | ENSP00000356437 |
| ENSP00000225724 | ENSP00000358417 |
| ENSP00000225724 | ENSP00000360183 |
| ENSP00000225724 | ENSP00000361057 |
| ENSP00000225724 | ENSP00000363349 |
| ENSP00000225724 | ENSP00000363779 |
| ENSP00000225724 | ENSP00000374529 |
| ENSP00000225724 | ENSP00000376268 |
| ENSP00000225724 | ENSP00000377769 |
| ENSP00000225724 | ENSP00000381293 |
| ENSP00000225724 | ENSP00000390783 |
| ENSP00000225724 | ENSP00000397441 |
| ENSP00000225724 | ENSP00000402240 |
| ENSP00000225726 | ENSP00000227471 |
| ENSP00000225726 | ENSP00000230582 |
| ENSP00000225726 | ENSP00000251038 |
| ENSP00000225726 | ENSP00000255389 |
| ENSP00000225726 | ENSP00000262265 |
| ENSP00000225726 | ENSP00000280350 |
| ENSP00000225726 | ENSP00000290649 |
| ENSP00000225726 | ENSP00000298292 |
| ENSP00000225726 | ENSP00000299767 |
| ENSP00000225726 | ENSP00000329411 |
| ENSP00000225726 | ENSP00000331288 |
| ENSP00000225726 | ENSP00000349887 |
| ENSP00000225726 | ENSP00000353073 |
| ENSP00000225726 | ENSP00000356989 |
| ENSP00000225726 | ENSP00000358997 |
| ENSP00000225726 | ENSP00000361076 |
| ENSP00000225726 | ENSP00000376445 |
| ENSP00000225728 | ENSP00000225916 |
| ENSP00000225728 | ENSP00000227474 |
| ENSP00000225728 | ENSP00000229595 |
| ENSP00000225728 | ENSP00000230859 |
| ENSP00000225728 | ENSP00000237380 |
| ENSP00000225728 | ENSP00000238112 |
| ENSP00000225728 | ENSP00000242480 |
| ENSP00000225728 | ENSP00000245206 |
| ENSP00000225728 | ENSP00000248566 |
| ENSP00000225728 | ENSP00000251871 |
| ENSP00000225728 | ENSP00000252622 |
| ENSP00000225728 | ENSP00000254900 |
| ENSP00000225728 | ENSP00000255764 |
| ENSP00000225728 | ENSP00000256379 |
| ENSP00000225728 | ENSP00000256398 |

|                 |                 |
|-----------------|-----------------|
| ENSP00000225728 | ENSP00000256854 |
| ENSP00000225728 | ENSP00000260129 |
| ENSP00000225728 | ENSP00000260956 |
| ENSP00000225728 | ENSP00000261245 |
| ENSP00000225728 | ENSP00000261601 |
| ENSP00000225728 | ENSP00000262367 |
| ENSP00000225728 | ENSP00000262518 |
| ENSP00000225728 | ENSP00000262608 |
| ENSP00000225728 | ENSP00000262982 |
| ENSP00000225728 | ENSP00000263390 |
| ENSP00000225728 | ENSP00000263857 |
| ENSP00000225728 | ENSP00000264501 |
| ENSP00000225728 | ENSP00000264515 |
| ENSP00000225728 | ENSP00000265073 |
| ENSP00000225728 | ENSP00000265350 |
| ENSP00000225728 | ENSP00000265351 |
| ENSP00000225728 | ENSP00000268711 |
| ENSP00000225728 | ENSP00000272645 |
| ENSP00000225728 | ENSP00000276072 |
| ENSP00000225728 | ENSP00000281928 |
| ENSP00000225728 | ENSP00000282326 |
| ENSP00000225728 | ENSP00000282884 |
| ENSP00000225728 | ENSP00000282892 |
| ENSP00000225728 | ENSP00000283882 |
| ENSP00000225728 | ENSP00000285896 |
| ENSP00000225728 | ENSP00000286317 |
| ENSP00000225728 | ENSP00000290663 |
| ENSP00000225728 | ENSP00000291688 |
| ENSP00000225728 | ENSP00000293777 |
| ENSP00000225728 | ENSP00000293860 |
| ENSP00000225728 | ENSP00000295066 |
| ENSP00000225728 | ENSP00000296328 |
| ENSP00000225728 | ENSP00000296786 |
| ENSP00000225728 | ENSP00000298937 |
| ENSP00000225728 | ENSP00000299601 |
| ENSP00000225728 | ENSP00000300651 |
| ENSP00000225728 | ENSP00000304593 |
| ENSP00000225728 | ENSP00000307850 |
| ENSP00000225728 | ENSP00000307863 |
| ENSP00000225728 | ENSP00000308944 |
| ENSP00000225728 | ENSP00000310596 |
| ENSP00000225728 | ENSP00000312735 |
| ENSP00000225728 | ENSP00000314311 |
| ENSP00000225728 | ENSP00000314949 |
| ENSP00000225728 | ENSP00000318604 |
| ENSP00000225728 | ENSP00000320566 |

|                 |                 |
|-----------------|-----------------|
| ENSP00000225728 | ENSP00000321711 |
| ENSP00000225728 | ENSP00000323720 |
| ENSP00000225728 | ENSP00000325677 |
| ENSP00000225728 | ENSP00000326767 |
| ENSP00000225728 | ENSP00000327716 |
| ENSP00000225728 | ENSP00000329029 |
| ENSP00000225728 | ENSP00000329933 |
| ENSP00000225728 | ENSP00000331111 |
| ENSP00000225728 | ENSP00000331310 |
| ENSP00000225728 | ENSP00000334188 |
| ENSP00000225728 | ENSP00000337340 |
| ENSP00000225728 | ENSP00000337405 |
| ENSP00000225728 | ENSP00000347184 |
| ENSP00000225728 | ENSP00000350967 |
| ENSP00000225728 | ENSP00000352738 |
| ENSP00000225728 | ENSP00000353622 |
| ENSP00000225728 | ENSP00000354522 |
| ENSP00000225728 | ENSP00000354742 |
| ENSP00000225728 | ENSP00000354951 |
| ENSP00000225728 | ENSP00000355205 |
| ENSP00000225728 | ENSP00000357861 |
| ENSP00000225728 | ENSP00000357887 |
| ENSP00000225728 | ENSP00000357907 |
| ENSP00000225728 | ENSP00000358064 |
| ENSP00000225728 | ENSP00000358478 |
| ENSP00000225728 | ENSP00000359290 |
| ENSP00000225728 | ENSP00000359474 |
| ENSP00000225728 | ENSP00000359518 |
| ENSP00000225728 | ENSP00000359531 |
| ENSP00000225728 | ENSP00000360025 |
| ENSP00000225728 | ENSP00000360473 |
| ENSP00000225728 | ENSP00000360515 |
| ENSP00000225728 | ENSP00000361949 |
| ENSP00000225728 | ENSP00000362532 |
| ENSP00000225728 | ENSP00000362948 |
| ENSP00000225728 | ENSP00000363193 |
| ENSP00000225728 | ENSP00000363734 |
| ENSP00000225728 | ENSP00000363779 |
| ENSP00000225728 | ENSP00000364929 |
| ENSP00000225728 | ENSP00000365025 |
| ENSP00000225728 | ENSP00000365837 |
| ENSP00000225728 | ENSP00000366135 |
| ENSP00000225728 | ENSP00000370589 |
| ENSP00000225728 | ENSP00000371236 |
| ENSP00000225728 | ENSP00000372694 |
| ENSP00000225728 | ENSP00000373715 |

|                 |                 |
|-----------------|-----------------|
| ENSP00000225728 | ENSP00000374213 |
| ENSP00000225728 | ENSP00000376204 |
| ENSP00000225728 | ENSP00000379217 |
| ENSP00000225728 | ENSP00000383503 |
| ENSP00000225728 | ENSP00000386759 |
| ENSP00000225728 | ENSP00000386992 |
| ENSP00000225728 | ENSP00000397636 |
| ENSP00000225728 | ENSP00000405636 |
| ENSP00000225728 | ENSP00000406293 |
| ENSP00000225728 | ENSP00000410530 |
| ENSP00000225728 | ENSP00000410954 |
| ENSP00000225728 | ENSP00000412319 |
| ENSP00000225728 | ENSP00000414110 |
| ENSP00000225728 | ENSP00000415678 |
| ENSP00000225728 | ENSP00000416599 |
| ENSP00000225737 | ENSP00000265717 |
| ENSP00000225737 | ENSP00000329002 |
| ENSP00000225842 | ENSP00000262854 |
| ENSP00000225873 | ENSP00000251038 |
| ENSP00000225873 | ENSP00000256216 |
| ENSP00000225873 | ENSP00000288774 |
| ENSP00000225873 | ENSP00000295030 |
| ENSP00000225873 | ENSP00000299138 |
| ENSP00000225873 | ENSP00000313432 |
| ENSP00000225873 | ENSP00000347836 |
| ENSP00000225873 | ENSP00000349016 |
| ENSP00000225873 | ENSP00000349543 |
| ENSP00000225873 | ENSP00000357051 |
| ENSP00000225873 | ENSP00000358312 |
| ENSP00000225873 | ENSP00000360116 |
| ENSP00000225873 | ENSP00000407401 |
| ENSP00000225916 | ENSP00000225983 |
| ENSP00000225916 | ENSP00000229595 |
| ENSP00000225916 | ENSP00000231487 |
| ENSP00000225916 | ENSP00000233146 |
| ENSP00000225916 | ENSP00000234040 |
| ENSP00000225916 | ENSP00000234111 |
| ENSP00000225916 | ENSP00000234296 |
| ENSP00000225916 | ENSP00000237380 |
| ENSP00000225916 | ENSP00000247219 |
| ENSP00000225916 | ENSP00000247843 |
| ENSP00000225916 | ENSP00000247970 |
| ENSP00000225916 | ENSP00000250615 |
| ENSP00000225916 | ENSP00000250894 |
| ENSP00000225916 | ENSP00000251871 |
| ENSP00000225916 | ENSP00000252996 |



|                 |                 |
|-----------------|-----------------|
| ENSP00000225916 | ENSP00000254193 |
| ENSP00000225916 | ENSP00000256379 |
| ENSP00000225916 | ENSP00000256398 |
| ENSP00000225916 | ENSP00000256442 |
| ENSP00000225916 | ENSP00000256474 |
| ENSP00000225916 | ENSP00000256897 |
| ENSP00000225916 | ENSP00000258648 |
| ENSP00000225916 | ENSP00000261819 |
| ENSP00000225916 | ENSP00000261951 |
| ENSP00000225916 | ENSP00000262300 |
| ENSP00000225916 | ENSP00000262367 |
| ENSP00000225916 | ENSP00000263205 |
| ENSP00000225916 | ENSP00000263390 |
| ENSP00000225916 | ENSP00000263620 |
| ENSP00000225916 | ENSP00000263974 |
| ENSP00000225916 | ENSP00000264183 |
| ENSP00000225916 | ENSP00000264193 |
| ENSP00000225916 | ENSP00000265354 |
| ENSP00000225916 | ENSP00000265537 |
| ENSP00000225916 | ENSP00000265990 |
| ENSP00000225916 | ENSP00000269127 |
| ENSP00000225916 | ENSP00000272645 |
| ENSP00000225916 | ENSP00000276072 |
| ENSP00000225916 | ENSP00000277541 |
| ENSP00000225916 | ENSP00000278412 |
| ENSP00000225916 | ENSP00000279873 |
| ENSP00000225916 | ENSP00000282892 |
| ENSP00000225916 | ENSP00000286317 |
| ENSP00000225916 | ENSP00000287239 |
| ENSP00000225916 | ENSP00000290663 |
| ENSP00000225916 | ENSP00000292035 |
| ENSP00000225916 | ENSP00000294168 |
| ENSP00000225916 | ENSP00000297431 |
| ENSP00000225916 | ENSP00000298937 |
| ENSP00000225916 | ENSP00000299424 |
| ENSP00000225916 | ENSP00000300648 |
| ENSP00000225916 | ENSP00000300651 |
| ENSP00000225916 | ENSP00000301764 |
| ENSP00000225916 | ENSP00000301887 |
| ENSP00000225916 | ENSP00000303315 |
| ENSP00000225916 | ENSP00000305422 |
| ENSP00000225916 | ENSP00000305790 |
| ENSP00000225916 | ENSP00000306983 |
| ENSP00000225916 | ENSP00000307208 |
| ENSP00000225916 | ENSP00000307684 |
| ENSP00000225916 | ENSP00000308236 |

|                 |                 |
|-----------------|-----------------|
| ENSP00000225916 | ENSP00000309555 |
| ENSP00000225916 | ENSP00000310649 |
| ENSP00000225916 | ENSP00000312735 |
| ENSP00000225916 | ENSP00000313420 |
| ENSP00000225916 | ENSP00000314949 |
| ENSP00000225916 | ENSP00000316114 |
| ENSP00000225916 | ENSP00000316786 |
| ENSP00000225916 | ENSP00000319104 |
| ENSP00000225916 | ENSP00000319169 |
| ENSP00000225916 | ENSP00000322579 |
| ENSP00000225916 | ENSP00000323720 |
| ENSP00000225916 | ENSP00000324444 |
| ENSP00000225916 | ENSP00000325612 |
| ENSP00000225916 | ENSP00000326550 |
| ENSP00000225916 | ENSP00000329411 |
| ENSP00000225916 | ENSP00000331310 |
| ENSP00000225916 | ENSP00000331879 |
| ENSP00000225916 | ENSP00000334061 |
| ENSP00000225916 | ENSP00000334280 |
| ENSP00000225916 | ENSP00000335044 |
| ENSP00000225916 | ENSP00000336750 |
| ENSP00000225916 | ENSP00000339353 |
| ENSP00000225916 | ENSP00000340271 |
| ENSP00000225916 | ENSP00000343392 |
| ENSP00000225916 | ENSP00000344456 |
| ENSP00000225916 | ENSP00000344504 |
| ENSP00000225916 | ENSP00000344537 |
| ENSP00000225916 | ENSP00000345681 |
| ENSP00000225916 | ENSP00000347602 |
| ENSP00000225916 | ENSP00000347733 |
| ENSP00000225916 | ENSP00000348069 |
| ENSP00000225916 | ENSP00000348610 |
| ENSP00000225916 | ENSP00000349213 |
| ENSP00000225916 | ENSP00000350078 |
| ENSP00000225916 | ENSP00000350283 |
| ENSP00000225916 | ENSP00000350967 |
| ENSP00000225916 | ENSP00000351284 |
| ENSP00000225916 | ENSP00000351490 |
| ENSP00000225916 | ENSP00000352257 |
| ENSP00000225916 | ENSP00000353622 |
| ENSP00000225916 | ENSP00000353793 |
| ENSP00000225916 | ENSP00000353804 |
| ENSP00000225916 | ENSP00000354633 |
| ENSP00000225916 | ENSP00000354673 |
| ENSP00000225916 | ENSP00000355205 |
| ENSP00000225916 | ENSP00000355884 |

|                 |                 |
|-----------------|-----------------|
| ENSP00000225916 | ENSP00000355958 |
| ENSP00000225916 | ENSP00000356405 |
| ENSP00000225916 | ENSP00000356448 |
| ENSP00000225916 | ENSP00000356530 |
| ENSP00000225916 | ENSP00000356848 |
| ENSP00000225916 | ENSP00000357047 |
| ENSP00000225916 | ENSP00000357442 |
| ENSP00000225916 | ENSP00000358854 |
| ENSP00000225916 | ENSP00000358886 |
| ENSP00000225916 | ENSP00000359290 |
| ENSP00000225916 | ENSP00000359837 |
| ENSP00000225916 | ENSP00000360286 |
| ENSP00000225916 | ENSP00000360515 |
| ENSP00000225916 | ENSP00000360621 |
| ENSP00000225916 | ENSP00000360676 |
| ENSP00000225916 | ENSP00000361998 |
| ENSP00000225916 | ENSP00000362068 |
| ENSP00000225916 | ENSP00000362948 |
| ENSP00000225916 | ENSP00000363193 |
| ENSP00000225916 | ENSP00000363779 |
| ENSP00000225916 | ENSP00000364815 |
| ENSP00000225916 | ENSP00000366974 |
| ENSP00000225916 | ENSP00000367406 |
| ENSP00000225916 | ENSP00000368686 |
| ENSP00000225916 | ENSP00000369695 |
| ENSP00000225916 | ENSP00000369716 |
| ENSP00000225916 | ENSP00000373340 |
| ENSP00000225916 | ENSP00000377218 |
| ENSP00000225916 | ENSP00000377747 |
| ENSP00000225916 | ENSP00000379372 |
| ENSP00000225916 | ENSP00000381098 |
| ENSP00000225916 | ENSP00000381657 |
| ENSP00000225916 | ENSP00000388320 |
| ENSP00000225916 | ENSP00000392028 |
| ENSP00000225916 | ENSP00000396749 |
| ENSP00000225916 | ENSP00000397259 |
| ENSP00000225916 | ENSP00000401121 |
| ENSP00000225916 | ENSP00000401445 |
| ENSP00000225916 | ENSP00000403359 |
| ENSP00000225916 | ENSP00000415316 |
| ENSP00000225927 | ENSP00000259253 |
| ENSP00000225927 | ENSP00000272227 |
| ENSP00000225927 | ENSP00000273308 |
| ENSP00000225927 | ENSP00000323313 |
| ENSP00000225927 | ENSP00000326699 |
| ENSP00000225927 | ENSP00000350102 |

|                 |                 |
|-----------------|-----------------|
| ENSP00000225927 | ENSP00000356599 |
| ENSP00000225969 | ENSP00000226796 |
| ENSP00000225969 | ENSP00000241600 |
| ENSP00000225969 | ENSP00000253099 |
| ENSP00000225969 | ENSP00000256404 |
| ENSP00000225969 | ENSP00000258383 |
| ENSP00000225969 | ENSP00000260102 |
| ENSP00000225969 | ENSP00000261819 |
| ENSP00000225969 | ENSP00000264995 |
| ENSP00000225969 | ENSP00000279242 |
| ENSP00000225969 | ENSP00000288937 |
| ENSP00000225969 | ENSP00000296102 |
| ENSP00000225969 | ENSP00000300151 |
| ENSP00000225969 | ENSP00000301585 |
| ENSP00000225969 | ENSP00000302768 |
| ENSP00000225969 | ENSP00000306548 |
| ENSP00000225969 | ENSP00000308275 |
| ENSP00000225969 | ENSP00000308897 |
| ENSP00000225969 | ENSP00000312311 |
| ENSP00000225969 | ENSP00000315017 |
| ENSP00000225969 | ENSP00000316879 |
| ENSP00000225969 | ENSP00000324122 |
| ENSP00000225969 | ENSP00000333401 |
| ENSP00000225969 | ENSP00000340281 |
| ENSP00000225969 | ENSP00000342026 |
| ENSP00000225969 | ENSP00000347087 |
| ENSP00000225969 | ENSP00000354525 |
| ENSP00000225969 | ENSP00000360498 |
| ENSP00000225969 | ENSP00000370930 |
| ENSP00000225969 | ENSP00000373404 |
| ENSP00000225969 | ENSP00000377486 |
| ENSP00000225969 | ENSP00000417602 |
| ENSP00000225972 | ENSP00000255465 |
| ENSP00000225972 | ENSP00000263753 |
| ENSP00000225972 | ENSP00000381891 |
| ENSP00000225983 | ENSP00000226574 |
| ENSP00000225983 | ENSP00000227524 |
| ENSP00000225983 | ENSP00000228318 |
| ENSP00000225983 | ENSP00000229595 |
| ENSP00000225983 | ENSP00000231449 |
| ENSP00000225983 | ENSP00000231572 |
| ENSP00000225983 | ENSP00000232014 |
| ENSP00000225983 | ENSP00000233084 |
| ENSP00000225983 | ENSP00000233146 |
| ENSP00000225983 | ENSP00000237530 |
| ENSP00000225983 | ENSP00000245206 |

|                 |                 |
|-----------------|-----------------|
| ENSP00000225983 | ENSP00000249923 |
| ENSP00000225983 | ENSP00000252699 |
| ENSP00000225983 | ENSP00000253363 |
| ENSP00000225983 | ENSP00000253792 |
| ENSP00000225983 | ENSP00000253794 |
| ENSP00000225983 | ENSP00000254900 |
| ENSP00000225983 | ENSP00000256398 |
| ENSP00000225983 | ENSP00000257566 |
| ENSP00000225983 | ENSP00000259803 |
| ENSP00000225983 | ENSP00000260665 |
| ENSP00000225983 | ENSP00000261712 |
| ENSP00000225983 | ENSP00000261819 |
| ENSP00000225983 | ENSP00000261973 |
| ENSP00000225983 | ENSP00000262027 |
| ENSP00000225983 | ENSP00000262030 |
| ENSP00000225983 | ENSP00000262032 |
| ENSP00000225983 | ENSP00000262238 |
| ENSP00000225983 | ENSP00000262518 |
| ENSP00000225983 | ENSP00000262608 |
| ENSP00000225983 | ENSP00000262776 |
| ENSP00000225983 | ENSP00000262803 |
| ENSP00000225983 | ENSP00000262850 |
| ENSP00000225983 | ENSP00000262982 |
| ENSP00000225983 | ENSP00000263201 |
| ENSP00000225983 | ENSP00000263974 |
| ENSP00000225983 | ENSP00000264161 |
| ENSP00000225983 | ENSP00000264335 |
| ENSP00000225983 | ENSP00000264639 |
| ENSP00000225983 | ENSP00000265056 |
| ENSP00000225983 | ENSP00000268379 |
| ENSP00000225983 | ENSP00000269122 |
| ENSP00000225983 | ENSP00000270625 |
| ENSP00000225983 | ENSP00000271555 |
| ENSP00000225983 | ENSP00000272227 |
| ENSP00000225983 | ENSP00000275015 |
| ENSP00000225983 | ENSP00000277865 |
| ENSP00000225983 | ENSP00000278412 |
| ENSP00000225983 | ENSP00000278572 |
| ENSP00000225983 | ENSP00000282050 |
| ENSP00000225983 | ENSP00000282516 |
| ENSP00000225983 | ENSP00000287598 |
| ENSP00000225983 | ENSP00000290158 |
| ENSP00000225983 | ENSP00000292055 |
| ENSP00000225983 | ENSP00000294168 |
| ENSP00000225983 | ENSP00000295901 |
| ENSP00000225983 | ENSP00000296255 |

|                 |                 |
|-----------------|-----------------|
| ENSP00000225983 | ENSP00000296755 |
| ENSP00000225983 | ENSP00000296785 |
| ENSP00000225983 | ENSP00000296930 |
| ENSP00000225983 | ENSP00000297185 |
| ENSP00000225983 | ENSP00000298532 |
| ENSP00000225983 | ENSP00000299767 |
| ENSP00000225983 | ENSP00000300648 |
| ENSP00000225983 | ENSP00000301030 |
| ENSP00000225983 | ENSP00000301764 |
| ENSP00000225983 | ENSP00000302886 |
| ENSP00000225983 | ENSP00000304350 |
| ENSP00000225983 | ENSP00000304592 |
| ENSP00000225983 | ENSP00000305790 |
| ENSP00000225983 | ENSP00000305976 |
| ENSP00000225983 | ENSP00000307208 |
| ENSP00000225983 | ENSP00000307567 |
| ENSP00000225983 | ENSP00000307889 |
| ENSP00000225983 | ENSP00000309474 |
| ENSP00000225983 | ENSP00000309555 |
| ENSP00000225983 | ENSP00000310040 |
| ENSP00000225983 | ENSP00000310129 |
| ENSP00000225983 | ENSP00000310668 |
| ENSP00000225983 | ENSP00000311430 |
| ENSP00000225983 | ENSP00000311747 |
| ENSP00000225983 | ENSP00000311816 |
| ENSP00000225983 | ENSP00000313420 |
| ENSP00000225983 | ENSP00000316328 |
| ENSP00000225983 | ENSP00000317334 |
| ENSP00000225983 | ENSP00000317468 |
| ENSP00000225983 | ENSP00000318861 |
| ENSP00000225983 | ENSP00000319169 |
| ENSP00000225983 | ENSP00000320566 |
| ENSP00000225983 | ENSP00000321503 |
| ENSP00000225983 | ENSP00000324560 |
| ENSP00000225983 | ENSP00000327070 |
| ENSP00000225983 | ENSP00000327213 |
| ENSP00000225983 | ENSP00000327821 |
| ENSP00000225983 | ENSP00000329419 |
| ENSP00000225983 | ENSP00000329933 |
| ENSP00000225983 | ENSP00000333568 |
| ENSP00000225983 | ENSP00000333667 |
| ENSP00000225983 | ENSP00000335321 |
| ENSP00000225983 | ENSP00000336712 |
| ENSP00000225983 | ENSP00000336842 |
| ENSP00000225983 | ENSP00000336927 |
| ENSP00000225983 | ENSP00000338157 |

|                 |                 |
|-----------------|-----------------|
| ENSP00000225983 | ENSP00000338413 |
| ENSP00000225983 | ENSP00000339527 |
| ENSP00000225983 | ENSP00000339795 |
| ENSP00000225983 | ENSP00000340019 |
| ENSP00000225983 | ENSP00000340466 |
| ENSP00000225983 | ENSP00000342026 |
| ENSP00000225983 | ENSP00000342056 |
| ENSP00000225983 | ENSP00000343535 |
| ENSP00000225983 | ENSP00000343745 |
| ENSP00000225983 | ENSP00000345681 |
| ENSP00000225983 | ENSP00000346022 |
| ENSP00000225983 | ENSP00000346050 |
| ENSP00000225983 | ENSP00000346067 |
| ENSP00000225983 | ENSP00000347733 |
| ENSP00000225983 | ENSP00000348010 |
| ENSP00000225983 | ENSP00000348551 |
| ENSP00000225983 | ENSP00000349213 |
| ENSP00000225983 | ENSP00000349748 |
| ENSP00000225983 | ENSP00000350767 |
| ENSP00000225983 | ENSP00000351284 |
| ENSP00000225983 | ENSP00000352257 |
| ENSP00000225983 | ENSP00000352400 |
| ENSP00000225983 | ENSP00000352514 |
| ENSP00000225983 | ENSP00000352516 |
| ENSP00000225983 | ENSP00000353622 |
| ENSP00000225983 | ENSP00000354125 |
| ENSP00000225983 | ENSP00000354522 |
| ENSP00000225983 | ENSP00000354586 |
| ENSP00000225983 | ENSP00000354720 |
| ENSP00000225983 | ENSP00000355011 |
| ENSP00000225983 | ENSP00000355205 |
| ENSP00000225983 | ENSP00000355759 |
| ENSP00000225983 | ENSP00000355890 |
| ENSP00000225983 | ENSP00000356520 |
| ENSP00000225983 | ENSP00000357459 |
| ENSP00000225983 | ENSP00000357887 |
| ENSP00000225983 | ENSP00000358417 |
| ENSP00000225983 | ENSP00000358716 |
| ENSP00000225983 | ENSP00000358857 |
| ENSP00000225983 | ENSP00000359345 |
| ENSP00000225983 | ENSP00000359552 |
| ENSP00000225983 | ENSP00000359727 |
| ENSP00000225983 | ENSP00000360268 |
| ENSP00000225983 | ENSP00000360532 |
| ENSP00000225983 | ENSP00000361076 |
| ENSP00000225983 | ENSP00000361202 |

|                 |                 |
|-----------------|-----------------|
| ENSP00000225983 | ENSP00000361686 |
| ENSP00000225983 | ENSP00000362413 |
| ENSP00000225983 | ENSP00000362592 |
| ENSP00000225983 | ENSP00000362744 |
| ENSP00000225983 | ENSP00000362824 |
| ENSP00000225983 | ENSP00000363018 |
| ENSP00000225983 | ENSP00000363205 |
| ENSP00000225983 | ENSP00000363745 |
| ENSP00000225983 | ENSP00000363804 |
| ENSP00000225983 | ENSP00000364188 |
| ENSP00000225983 | ENSP00000364794 |
| ENSP00000225983 | ENSP00000365877 |
| ENSP00000225983 | ENSP00000366607 |
| ENSP00000225983 | ENSP00000367299 |
| ENSP00000225983 | ENSP00000367705 |
| ENSP00000225983 | ENSP00000368438 |
| ENSP00000225983 | ENSP00000368646 |
| ENSP00000225983 | ENSP00000370023 |
| ENSP00000225983 | ENSP00000370826 |
| ENSP00000225983 | ENSP00000371607 |
| ENSP00000225983 | ENSP00000374213 |
| ENSP00000225983 | ENSP00000375986 |
| ENSP00000225983 | ENSP00000376309 |
| ENSP00000225983 | ENSP00000377954 |
| ENSP00000225983 | ENSP00000379888 |
| ENSP00000225983 | ENSP00000379933 |
| ENSP00000225983 | ENSP00000382392 |
| ENSP00000225983 | ENSP00000386759 |
| ENSP00000225983 | ENSP00000392270 |
| ENSP00000225983 | ENSP00000396976 |
| ENSP00000225983 | ENSP00000404121 |
| ENSP00000225983 | ENSP00000408957 |
| ENSP00000225983 | ENSP00000416892 |
| ENSP00000226091 | ENSP00000260130 |
| ENSP00000226091 | ENSP00000284811 |
| ENSP00000226091 | ENSP00000311005 |
| ENSP00000226091 | ENSP00000348550 |
| ENSP00000226091 | ENSP00000363921 |
| ENSP00000226091 | ENSP00000381098 |
| ENSP00000226091 | ENSP00000392423 |
| ENSP00000226091 | ENSP00000394794 |
| ENSP00000226105 | ENSP00000227474 |
| ENSP00000226105 | ENSP00000238616 |
| ENSP00000226105 | ENSP00000251038 |
| ENSP00000226105 | ENSP00000252622 |
| ENSP00000226105 | ENSP00000254605 |



|                 |                 |
|-----------------|-----------------|
| ENSP00000226105 | ENSP00000255389 |
| ENSP00000226105 | ENSP00000256031 |
| ENSP00000226105 | ENSP00000257177 |
| ENSP00000226105 | ENSP00000261396 |
| ENSP00000226105 | ENSP00000261609 |
| ENSP00000226105 | ENSP00000262077 |
| ENSP00000226105 | ENSP00000263710 |
| ENSP00000226105 | ENSP00000264276 |
| ENSP00000226105 | ENSP00000264883 |
| ENSP00000226105 | ENSP00000264951 |
| ENSP00000226105 | ENSP00000285896 |
| ENSP00000226105 | ENSP00000296577 |
| ENSP00000226105 | ENSP00000305721 |
| ENSP00000226105 | ENSP00000316032 |
| ENSP00000226105 | ENSP00000317334 |
| ENSP00000226105 | ENSP00000343701 |
| ENSP00000226105 | ENSP00000345144 |
| ENSP00000226105 | ENSP00000346453 |
| ENSP00000226105 | ENSP00000348107 |
| ENSP00000226105 | ENSP00000360286 |
| ENSP00000226105 | ENSP00000364293 |
| ENSP00000226105 | ENSP00000364582 |
| ENSP00000226105 | ENSP00000365811 |
| ENSP00000226105 | ENSP00000366607 |
| ENSP00000226105 | ENSP00000367766 |
| ENSP00000226105 | ENSP00000373715 |
| ENSP00000226105 | ENSP00000378624 |
| ENSP00000226105 | ENSP00000390158 |
| ENSP00000226218 | ENSP00000234040 |
| ENSP00000226218 | ENSP00000264708 |
| ENSP00000226218 | ENSP00000265023 |
| ENSP00000226218 | ENSP00000265171 |
| ENSP00000226218 | ENSP00000277865 |
| ENSP00000226218 | ENSP00000288828 |
| ENSP00000226218 | ENSP00000297350 |
| ENSP00000226218 | ENSP00000327647 |
| ENSP00000226218 | ENSP00000339328 |
| ENSP00000226218 | ENSP00000348602 |
| ENSP00000226218 | ENSP00000350512 |
| ENSP00000226218 | ENSP00000354782 |
| ENSP00000226218 | ENSP00000355896 |
| ENSP00000226218 | ENSP00000368646 |
| ENSP00000226218 | ENSP00000375730 |
| ENSP00000226230 | ENSP00000261507 |
| ENSP00000226230 | ENSP00000352708 |
| ENSP00000226247 | ENSP00000266744 |

|                 |                 |
|-----------------|-----------------|
| ENSP00000226247 | ENSP00000363708 |
| ENSP00000226284 | ENSP00000227758 |
| ENSP00000226284 | ENSP00000242285 |
| ENSP00000226284 | ENSP00000256658 |
| ENSP00000226284 | ENSP00000349298 |
| ENSP00000226284 | ENSP00000350199 |
| ENSP00000226284 | ENSP00000393596 |
| ENSP00000226299 | ENSP00000251968 |
| ENSP00000226299 | ENSP00000263985 |
| ENSP00000226299 | ENSP00000264029 |
| ENSP00000226299 | ENSP00000280362 |
| ENSP00000226299 | ENSP00000301021 |
| ENSP00000226299 | ENSP00000340019 |
| ENSP00000226299 | ENSP00000348565 |
| ENSP00000226299 | ENSP00000348877 |
| ENSP00000226299 | ENSP00000352928 |
| ENSP00000226299 | ENSP00000379933 |
| ENSP00000226382 | ENSP00000341679 |
| ENSP00000226382 | ENSP00000390783 |
| ENSP00000226432 | ENSP00000233616 |
| ENSP00000226432 | ENSP00000251038 |
| ENSP00000226432 | ENSP00000306124 |
| ENSP00000226432 | ENSP00000359552 |
| ENSP00000226522 | ENSP00000234170 |
| ENSP00000226522 | ENSP00000256429 |
| ENSP00000226522 | ENSP00000262850 |
| ENSP00000226522 | ENSP00000274353 |
| ENSP00000226522 | ENSP00000278671 |
| ENSP00000226522 | ENSP00000305721 |
| ENSP00000226522 | ENSP00000355153 |
| ENSP00000226522 | ENSP00000357288 |
| ENSP00000226522 | ENSP00000358423 |
| ENSP00000226522 | ENSP00000358918 |
| ENSP00000226574 | ENSP00000227163 |
| ENSP00000226574 | ENSP00000228284 |
| ENSP00000226574 | ENSP00000239849 |
| ENSP00000226574 | ENSP00000244565 |
| ENSP00000226574 | ENSP00000248673 |
| ENSP00000226574 | ENSP00000251871 |
| ENSP00000226574 | ENSP00000259808 |
| ENSP00000226574 | ENSP00000261884 |
| ENSP00000226574 | ENSP00000262238 |
| ENSP00000226574 | ENSP00000263056 |
| ENSP00000226574 | ENSP00000263401 |
| ENSP00000226574 | ENSP00000264639 |
| ENSP00000226574 | ENSP00000264705 |

|                 |                 |
|-----------------|-----------------|
| ENSP00000226574 | ENSP00000265960 |
| ENSP00000226574 | ENSP00000267935 |
| ENSP00000226574 | ENSP00000268058 |
| ENSP00000226574 | ENSP00000268638 |
| ENSP00000226574 | ENSP00000269122 |
| ENSP00000226574 | ENSP00000271002 |
| ENSP00000226574 | ENSP00000274458 |
| ENSP00000226574 | ENSP00000275015 |
| ENSP00000226574 | ENSP00000277541 |
| ENSP00000226574 | ENSP00000278572 |
| ENSP00000226574 | ENSP00000278980 |
| ENSP00000226574 | ENSP00000289431 |
| ENSP00000226574 | ENSP00000295025 |
| ENSP00000226574 | ENSP00000295897 |
| ENSP00000226574 | ENSP00000297185 |
| ENSP00000226574 | ENSP00000304133 |
| ENSP00000226574 | ENSP00000304544 |
| ENSP00000226574 | ENSP00000304803 |
| ENSP00000226574 | ENSP00000305422 |
| ENSP00000226574 | ENSP00000306245 |
| ENSP00000226574 | ENSP00000307900 |
| ENSP00000226574 | ENSP00000308236 |
| ENSP00000226574 | ENSP00000311513 |
| ENSP00000226574 | ENSP00000313420 |
| ENSP00000226574 | ENSP00000314949 |
| ENSP00000226574 | ENSP00000317891 |
| ENSP00000226574 | ENSP00000318115 |
| ENSP00000226574 | ENSP00000321203 |
| ENSP00000226574 | ENSP00000325376 |
| ENSP00000226574 | ENSP00000325663 |
| ENSP00000226574 | ENSP00000325690 |
| ENSP00000226574 | ENSP00000329357 |
| ENSP00000226574 | ENSP00000329419 |
| ENSP00000226574 | ENSP00000329967 |
| ENSP00000226574 | ENSP00000333122 |
| ENSP00000226574 | ENSP00000334061 |
| ENSP00000226574 | ENSP00000337088 |
| ENSP00000226574 | ENSP00000341805 |
| ENSP00000226574 | ENSP00000343701 |
| ENSP00000226574 | ENSP00000344352 |
| ENSP00000226574 | ENSP00000344456 |
| ENSP00000226574 | ENSP00000348054 |
| ENSP00000226574 | ENSP00000348551 |
| ENSP00000226574 | ENSP00000349748 |
| ENSP00000226574 | ENSP00000349959 |
| ENSP00000226574 | ENSP00000350283 |

|                 |                 |
|-----------------|-----------------|
| ENSP00000226574 | ENSP00000350512 |
| ENSP00000226574 | ENSP00000351894 |
| ENSP00000226574 | ENSP00000352673 |
| ENSP00000226574 | ENSP00000352738 |
| ENSP00000226574 | ENSP00000353622 |
| ENSP00000226574 | ENSP00000354346 |
| ENSP00000226574 | ENSP00000355759 |
| ENSP00000226574 | ENSP00000356623 |
| ENSP00000226574 | ENSP00000356713 |
| ENSP00000226574 | ENSP00000358812 |
| ENSP00000226574 | ENSP00000358997 |
| ENSP00000226574 | ENSP00000359206 |
| ENSP00000226574 | ENSP00000359727 |
| ENSP00000226574 | ENSP00000364893 |
| ENSP00000226574 | ENSP00000366032 |
| ENSP00000226574 | ENSP00000366607 |
| ENSP00000226574 | ENSP00000366915 |
| ENSP00000226574 | ENSP00000367454 |
| ENSP00000226574 | ENSP00000369293 |
| ENSP00000226574 | ENSP00000370984 |
| ENSP00000226574 | ENSP00000371475 |
| ENSP00000226574 | ENSP00000376903 |
| ENSP00000226574 | ENSP00000377218 |
| ENSP00000226574 | ENSP00000378503 |
| ENSP00000226574 | ENSP00000379888 |
| ENSP00000226574 | ENSP00000381461 |
| ENSP00000226574 | ENSP00000384026 |
| ENSP00000226574 | ENSP00000400476 |
| ENSP00000226574 | ENSP00000415836 |
| ENSP00000226574 | ENSP00000419475 |
| ENSP00000226730 | ENSP00000278572 |
| ENSP00000226730 | ENSP00000338010 |
| ENSP00000226730 | ENSP00000369293 |
| ENSP00000226760 | ENSP00000276603 |
| ENSP00000226760 | ENSP00000366395 |
| ENSP00000226796 | ENSP00000227524 |
| ENSP00000226796 | ENSP00000230050 |
| ENSP00000226796 | ENSP00000230859 |
| ENSP00000226796 | ENSP00000232888 |
| ENSP00000226796 | ENSP00000233078 |
| ENSP00000226796 | ENSP00000235090 |
| ENSP00000226796 | ENSP00000248450 |
| ENSP00000226796 | ENSP00000251289 |
| ENSP00000226796 | ENSP00000252115 |
| ENSP00000226796 | ENSP00000253108 |
| ENSP00000226796 | ENSP00000253237 |

|                 |                 |
|-----------------|-----------------|
| ENSP00000226796 | ENSP00000253363 |
| ENSP00000226796 | ENSP00000254037 |
| ENSP00000226796 | ENSP00000254605 |
| ENSP00000226796 | ENSP00000260956 |
| ENSP00000226796 | ENSP00000261015 |
| ENSP00000226796 | ENSP00000261637 |
| ENSP00000226796 | ENSP00000261741 |
| ENSP00000226796 | ENSP00000262056 |
| ENSP00000226796 | ENSP00000263857 |
| ENSP00000226796 | ENSP00000265753 |
| ENSP00000226796 | ENSP00000265758 |
| ENSP00000226796 | ENSP00000267425 |
| ENSP00000226796 | ENSP00000271628 |
| ENSP00000226796 | ENSP00000274606 |
| ENSP00000226796 | ENSP00000285873 |
| ENSP00000226796 | ENSP00000291576 |
| ENSP00000226796 | ENSP00000296792 |
| ENSP00000226796 | ENSP00000296802 |
| ENSP00000226796 | ENSP00000297579 |
| ENSP00000226796 | ENSP00000298746 |
| ENSP00000226796 | ENSP00000301364 |
| ENSP00000226796 | ENSP00000301788 |
| ENSP00000226796 | ENSP00000302768 |
| ENSP00000226796 | ENSP00000302896 |
| ENSP00000226796 | ENSP00000304370 |
| ENSP00000226796 | ENSP00000305702 |
| ENSP00000226796 | ENSP00000308179 |
| ENSP00000226796 | ENSP00000308332 |
| ENSP00000226796 | ENSP00000308533 |
| ENSP00000226796 | ENSP00000309334 |
| ENSP00000226796 | ENSP00000311083 |
| ENSP00000226796 | ENSP00000312981 |
| ENSP00000226796 | ENSP00000314193 |
| ENSP00000226796 | ENSP00000314311 |
| ENSP00000226796 | ENSP00000314348 |
| ENSP00000226796 | ENSP00000315182 |
| ENSP00000226796 | ENSP00000316879 |
| ENSP00000226796 | ENSP00000317992 |
| ENSP00000226796 | ENSP00000318195 |
| ENSP00000226796 | ENSP00000320917 |
| ENSP00000226796 | ENSP00000321326 |
| ENSP00000226796 | ENSP00000321706 |
| ENSP00000226796 | ENSP00000322016 |
| ENSP00000226796 | ENSP00000322570 |
| ENSP00000226796 | ENSP00000323302 |
| ENSP00000226796 | ENSP00000324122 |

|                 |                 |
|-----------------|-----------------|
| ENSP00000226796 | ENSP00000325690 |
| ENSP00000226796 | ENSP00000326806 |
| ENSP00000226796 | ENSP00000326981 |
| ENSP00000226796 | ENSP00000327179 |
| ENSP00000226796 | ENSP00000331817 |
| ENSP00000226796 | ENSP00000331879 |
| ENSP00000226796 | ENSP00000332198 |
| ENSP00000226796 | ENSP00000334148 |
| ENSP00000226796 | ENSP00000336868 |
| ENSP00000226796 | ENSP00000338862 |
| ENSP00000226796 | ENSP00000339845 |
| ENSP00000226796 | ENSP00000340281 |
| ENSP00000226796 | ENSP00000343103 |
| ENSP00000226796 | ENSP00000343745 |
| ENSP00000226796 | ENSP00000344393 |
| ENSP00000226796 | ENSP00000345917 |
| ENSP00000226796 | ENSP00000346120 |
| ENSP00000226796 | ENSP00000347087 |
| ENSP00000226796 | ENSP00000347345 |
| ENSP00000226796 | ENSP00000350071 |
| ENSP00000226796 | ENSP00000351100 |
| ENSP00000226796 | ENSP00000351697 |
| ENSP00000226796 | ENSP00000352738 |
| ENSP00000226796 | ENSP00000354812 |
| ENSP00000226796 | ENSP00000356290 |
| ENSP00000226796 | ENSP00000356811 |
| ENSP00000226796 | ENSP00000358563 |
| ENSP00000226796 | ENSP00000358716 |
| ENSP00000226796 | ENSP00000358812 |
| ENSP00000226796 | ENSP00000360031 |
| ENSP00000226796 | ENSP00000361076 |
| ENSP00000226796 | ENSP00000361949 |
| ENSP00000226796 | ENSP00000361982 |
| ENSP00000226796 | ENSP00000362688 |
| ENSP00000226796 | ENSP00000362900 |
| ENSP00000226796 | ENSP00000363308 |
| ENSP00000226796 | ENSP00000363313 |
| ENSP00000226796 | ENSP00000366974 |
| ENSP00000226796 | ENSP00000368349 |
| ENSP00000226796 | ENSP00000368887 |
| ENSP00000226796 | ENSP00000369162 |
| ENSP00000226796 | ENSP00000370083 |
| ENSP00000226796 | ENSP00000370119 |
| ENSP00000226796 | ENSP00000370589 |
| ENSP00000226796 | ENSP00000371169 |
| ENSP00000226796 | ENSP00000372199 |

|                 |                 |
|-----------------|-----------------|
| ENSP00000226796 | ENSP00000374390 |
| ENSP00000226796 | ENSP00000376309 |
| ENSP00000226796 | ENSP00000377617 |
| ENSP00000226796 | ENSP00000378160 |
| ENSP00000226796 | ENSP00000379607 |
| ENSP00000226796 | ENSP00000379888 |
| ENSP00000226796 | ENSP00000380982 |
| ENSP00000226796 | ENSP00000382392 |
| ENSP00000226796 | ENSP00000382779 |
| ENSP00000226796 | ENSP00000384302 |
| ENSP00000226796 | ENSP00000393241 |
| ENSP00000226796 | ENSP00000401371 |
| ENSP00000226796 | ENSP00000403175 |
| ENSP00000226796 | ENSP00000412583 |
| ENSP00000226796 | ENSP00000416110 |
| ENSP00000226796 | ENSP00000416959 |
| ENSP00000226798 | ENSP00000227524 |
| ENSP00000226798 | ENSP00000228284 |
| ENSP00000226798 | ENSP00000292535 |
| ENSP00000226798 | ENSP00000304370 |
| ENSP00000226798 | ENSP00000334148 |
| ENSP00000226798 | ENSP00000387006 |
| ENSP00000226840 | ENSP00000232607 |
| ENSP00000226840 | ENSP00000251038 |
| ENSP00000226840 | ENSP00000263881 |
| ENSP00000226840 | ENSP00000270776 |
| ENSP00000226951 | ENSP00000316460 |
| ENSP00000227163 | ENSP00000232014 |
| ENSP00000227163 | ENSP00000262367 |
| ENSP00000227163 | ENSP00000263620 |
| ENSP00000227163 | ENSP00000264709 |
| ENSP00000227163 | ENSP00000265372 |
| ENSP00000227163 | ENSP00000267163 |
| ENSP00000227163 | ENSP00000268058 |
| ENSP00000227163 | ENSP00000268638 |
| ENSP00000227163 | ENSP00000268679 |
| ENSP00000227163 | ENSP00000278412 |
| ENSP00000227163 | ENSP00000283921 |
| ENSP00000227163 | ENSP00000291009 |
| ENSP00000227163 | ENSP00000294702 |
| ENSP00000227163 | ENSP00000305422 |
| ENSP00000227163 | ENSP00000306245 |
| ENSP00000227163 | ENSP00000328207 |
| ENSP00000227163 | ENSP00000345681 |
| ENSP00000227163 | ENSP00000345702 |
| ENSP00000227163 | ENSP00000353344 |

|                 |                 |
|-----------------|-----------------|
| ENSP00000227163 | ENSP00000353622 |
| ENSP00000227163 | ENSP00000367797 |
| ENSP00000227163 | ENSP00000367972 |
| ENSP00000227163 | ENSP00000381891 |
| ENSP00000227163 | ENSP00000385361 |
| ENSP00000227163 | ENSP00000386165 |
| ENSP00000227163 | ENSP00000395535 |
| ENSP00000227163 | ENSP00000414187 |
| ENSP00000227266 | ENSP00000357484 |
| ENSP00000227266 | ENSP00000380349 |
| ENSP00000227322 | ENSP00000298852 |
| ENSP00000227322 | ENSP00000309831 |
| ENSP00000227348 | ENSP00000345731 |
| ENSP00000227348 | ENSP00000349486 |
| ENSP00000227471 | ENSP00000229314 |
| ENSP00000227471 | ENSP00000245615 |
| ENSP00000227471 | ENSP00000295770 |
| ENSP00000227471 | ENSP00000307275 |
| ENSP00000227471 | ENSP00000320309 |
| ENSP00000227471 | ENSP00000336994 |
| ENSP00000227471 | ENSP00000337053 |
| ENSP00000227471 | ENSP00000350263 |
| ENSP00000227471 | ENSP00000355963 |
| ENSP00000227471 | ENSP00000358997 |
| ENSP00000227471 | ENSP00000361057 |
| ENSP00000227471 | ENSP00000364188 |
| ENSP00000227471 | ENSP00000365567 |
| ENSP00000227471 | ENSP00000369618 |
| ENSP00000227471 | ENSP00000381237 |
| ENSP00000227474 | ENSP00000229214 |
| ENSP00000227474 | ENSP00000244051 |
| ENSP00000227474 | ENSP00000254803 |
| ENSP00000227474 | ENSP00000256383 |
| ENSP00000227474 | ENSP00000256398 |
| ENSP00000227474 | ENSP00000256854 |
| ENSP00000227474 | ENSP00000260129 |
| ENSP00000227474 | ENSP00000260210 |
| ENSP00000227474 | ENSP00000260956 |
| ENSP00000227474 | ENSP00000261758 |
| ENSP00000227474 | ENSP00000261868 |
| ENSP00000227474 | ENSP00000263576 |
| ENSP00000227474 | ENSP00000263657 |
| ENSP00000227474 | ENSP00000264670 |
| ENSP00000227474 | ENSP00000264951 |
| ENSP00000227474 | ENSP00000273962 |
| ENSP00000227474 | ENSP00000275605 |



|                 |                 |
|-----------------|-----------------|
| ENSP00000227474 | ENSP00000282276 |
| ENSP00000227474 | ENSP00000286317 |
| ENSP00000227474 | ENSP00000296577 |
| ENSP00000227474 | ENSP00000297990 |
| ENSP00000227474 | ENSP00000298310 |
| ENSP00000227474 | ENSP00000298746 |
| ENSP00000227474 | ENSP00000298937 |
| ENSP00000227474 | ENSP00000300648 |
| ENSP00000227474 | ENSP00000302896 |
| ENSP00000227474 | ENSP00000303515 |
| ENSP00000227474 | ENSP00000304593 |
| ENSP00000227474 | ENSP00000307863 |
| ENSP00000227474 | ENSP00000310129 |
| ENSP00000227474 | ENSP00000310596 |
| ENSP00000227474 | ENSP00000311977 |
| ENSP00000227474 | ENSP00000312356 |
| ENSP00000227474 | ENSP00000314311 |
| ENSP00000227474 | ENSP00000314441 |
| ENSP00000227474 | ENSP00000318604 |
| ENSP00000227474 | ENSP00000324122 |
| ENSP00000227474 | ENSP00000324956 |
| ENSP00000227474 | ENSP00000326981 |
| ENSP00000227474 | ENSP00000327821 |
| ENSP00000227474 | ENSP00000328671 |
| ENSP00000227474 | ENSP00000334188 |
| ENSP00000227474 | ENSP00000338862 |
| ENSP00000227474 | ENSP00000339881 |
| ENSP00000227474 | ENSP00000345530 |
| ENSP00000227474 | ENSP00000346453 |
| ENSP00000227474 | ENSP00000348107 |
| ENSP00000227474 | ENSP00000350967 |
| ENSP00000227474 | ENSP00000352678 |
| ENSP00000227474 | ENSP00000354812 |
| ENSP00000227474 | ENSP00000356476 |
| ENSP00000227474 | ENSP00000358563 |
| ENSP00000227474 | ENSP00000358812 |
| ENSP00000227474 | ENSP00000361982 |
| ENSP00000227474 | ENSP00000363779 |
| ENSP00000227474 | ENSP00000364293 |
| ENSP00000227474 | ENSP00000364320 |
| ENSP00000227474 | ENSP00000370589 |
| ENSP00000227474 | ENSP00000379228 |
| ENSP00000227474 | ENSP00000382595 |
| ENSP00000227474 | ENSP00000412922 |
| ENSP00000227507 | ENSP00000228872 |
| ENSP00000227507 | ENSP00000229758 |

|                 |                 |
|-----------------|-----------------|
| ENSP00000227507 | ENSP00000231487 |
| ENSP00000227507 | ENSP00000235090 |
| ENSP00000227507 | ENSP00000244741 |
| ENSP00000227507 | ENSP00000248553 |
| ENSP00000227507 | ENSP00000256398 |
| ENSP00000227507 | ENSP00000256897 |
| ENSP00000227507 | ENSP00000257430 |
| ENSP00000227507 | ENSP00000257934 |
| ENSP00000227507 | ENSP00000260187 |
| ENSP00000227507 | ENSP00000261424 |
| ENSP00000227507 | ENSP00000261712 |
| ENSP00000227507 | ENSP00000262133 |
| ENSP00000227507 | ENSP00000262367 |
| ENSP00000227507 | ENSP00000262904 |
| ENSP00000227507 | ENSP00000264169 |
| ENSP00000227507 | ENSP00000264335 |
| ENSP00000227507 | ENSP00000264637 |
| ENSP00000227507 | ENSP00000264639 |
| ENSP00000227507 | ENSP00000265056 |
| ENSP00000227507 | ENSP00000265351 |
| ENSP00000227507 | ENSP00000267163 |
| ENSP00000227507 | ENSP00000269701 |
| ENSP00000227507 | ENSP00000271883 |
| ENSP00000227507 | ENSP00000276072 |
| ENSP00000227507 | ENSP00000276893 |
| ENSP00000227507 | ENSP00000278616 |
| ENSP00000227507 | ENSP00000281623 |
| ENSP00000227507 | ENSP00000287598 |
| ENSP00000227507 | ENSP00000295901 |
| ENSP00000227507 | ENSP00000296509 |
| ENSP00000227507 | ENSP00000298139 |
| ENSP00000227507 | ENSP00000298552 |
| ENSP00000227507 | ENSP00000300213 |
| ENSP00000227507 | ENSP00000302530 |
| ENSP00000227507 | ENSP00000304226 |
| ENSP00000227507 | ENSP00000306999 |
| ENSP00000227507 | ENSP00000307272 |
| ENSP00000227507 | ENSP00000309474 |
| ENSP00000227507 | ENSP00000309871 |
| ENSP00000227507 | ENSP00000310841 |
| ENSP00000227507 | ENSP00000311083 |
| ENSP00000227507 | ENSP00000313420 |
| ENSP00000227507 | ENSP00000314949 |
| ENSP00000227507 | ENSP00000319169 |
| ENSP00000227507 | ENSP00000321636 |
| ENSP00000227507 | ENSP00000323246 |

|                 |                 |
|-----------------|-----------------|
| ENSP00000227507 | ENSP00000323377 |
| ENSP00000227507 | ENSP00000325120 |
| ENSP00000227507 | ENSP00000329357 |
| ENSP00000227507 | ENSP00000332171 |
| ENSP00000227507 | ENSP00000332353 |
| ENSP00000227507 | ENSP00000343741 |
| ENSP00000227507 | ENSP00000344456 |
| ENSP00000227507 | ENSP00000344460 |
| ENSP00000227507 | ENSP00000346566 |
| ENSP00000227507 | ENSP00000347169 |
| ENSP00000227507 | ENSP00000347602 |
| ENSP00000227507 | ENSP00000347733 |
| ENSP00000227507 | ENSP00000348550 |
| ENSP00000227507 | ENSP00000350283 |
| ENSP00000227507 | ENSP00000350491 |
| ENSP00000227507 | ENSP00000351284 |
| ENSP00000227507 | ENSP00000352121 |
| ENSP00000227507 | ENSP00000353622 |
| ENSP00000227507 | ENSP00000354558 |
| ENSP00000227507 | ENSP00000355013 |
| ENSP00000227507 | ENSP00000355153 |
| ENSP00000227507 | ENSP00000357907 |
| ENSP00000227507 | ENSP00000358404 |
| ENSP00000227507 | ENSP00000360660 |
| ENSP00000227507 | ENSP00000361465 |
| ENSP00000227507 | ENSP00000362532 |
| ENSP00000227507 | ENSP00000363827 |
| ENSP00000227507 | ENSP00000365775 |
| ENSP00000227507 | ENSP00000368438 |
| ENSP00000227507 | ENSP00000368686 |
| ENSP00000227507 | ENSP00000369757 |
| ENSP00000227507 | ENSP00000377793 |
| ENSP00000227507 | ENSP00000381932 |
| ENSP00000227507 | ENSP00000384109 |
| ENSP00000227507 | ENSP00000384675 |
| ENSP00000227507 | ENSP00000390098 |
| ENSP00000227507 | ENSP00000413720 |
| ENSP00000227507 | ENSP00000414259 |
| ENSP00000227520 | ENSP00000329466 |
| ENSP00000227524 | ENSP00000230050 |
| ENSP00000227524 | ENSP00000236273 |
| ENSP00000227524 | ENSP00000240304 |
| ENSP00000227524 | ENSP00000240922 |
| ENSP00000227524 | ENSP00000243563 |
| ENSP00000227524 | ENSP00000244520 |
| ENSP00000227524 | ENSP00000245539 |

|                 |                 |
|-----------------|-----------------|
| ENSP00000227524 | ENSP00000248553 |
| ENSP00000227524 | ENSP00000252137 |
| ENSP00000227524 | ENSP00000252622 |
| ENSP00000227524 | ENSP00000253108 |
| ENSP00000227524 | ENSP00000253363 |
| ENSP00000227524 | ENSP00000254193 |
| ENSP00000227524 | ENSP00000260210 |
| ENSP00000227524 | ENSP00000261531 |
| ENSP00000227524 | ENSP00000261973 |
| ENSP00000227524 | ENSP00000262962 |
| ENSP00000227524 | ENSP00000264951 |
| ENSP00000227524 | ENSP00000265107 |
| ENSP00000227524 | ENSP00000266079 |
| ENSP00000227524 | ENSP00000266735 |
| ENSP00000227524 | ENSP00000267812 |
| ENSP00000227524 | ENSP00000268482 |
| ENSP00000227524 | ENSP00000271526 |
| ENSP00000227524 | ENSP00000271628 |
| ENSP00000227524 | ENSP00000272091 |
| ENSP00000227524 | ENSP00000272139 |
| ENSP00000227524 | ENSP00000274712 |
| ENSP00000227524 | ENSP00000276570 |
| ENSP00000227524 | ENSP00000278572 |
| ENSP00000227524 | ENSP00000282251 |
| ENSP00000227524 | ENSP00000283943 |
| ENSP00000227524 | ENSP00000290541 |
| ENSP00000227524 | ENSP00000296215 |
| ENSP00000227524 | ENSP00000296702 |
| ENSP00000227524 | ENSP00000297151 |
| ENSP00000227524 | ENSP00000298229 |
| ENSP00000227524 | ENSP00000300146 |
| ENSP00000227524 | ENSP00000300413 |
| ENSP00000227524 | ENSP00000301740 |
| ENSP00000227524 | ENSP00000301764 |
| ENSP00000227524 | ENSP00000302160 |
| ENSP00000227524 | ENSP00000302896 |
| ENSP00000227524 | ENSP00000303191 |
| ENSP00000227524 | ENSP00000304350 |
| ENSP00000227524 | ENSP00000304370 |
| ENSP00000227524 | ENSP00000305790 |
| ENSP00000227524 | ENSP00000307863 |
| ENSP00000227524 | ENSP00000308369 |
| ENSP00000227524 | ENSP00000310448 |
| ENSP00000227524 | ENSP00000310596 |
| ENSP00000227524 | ENSP00000310721 |
| ENSP00000227524 | ENSP00000311028 |

|                 |                 |
|-----------------|-----------------|
| ENSP00000227524 | ENSP00000312981 |
| ENSP00000227524 | ENSP00000313674 |
| ENSP00000227524 | ENSP00000315379 |
| ENSP00000227524 | ENSP00000318861 |
| ENSP00000227524 | ENSP00000319341 |
| ENSP00000227524 | ENSP00000323302 |
| ENSP00000227524 | ENSP00000324122 |
| ENSP00000227524 | ENSP00000325448 |
| ENSP00000227524 | ENSP00000326261 |
| ENSP00000227524 | ENSP00000326411 |
| ENSP00000227524 | ENSP00000326514 |
| ENSP00000227524 | ENSP00000326806 |
| ENSP00000227524 | ENSP00000331907 |
| ENSP00000227524 | ENSP00000332103 |
| ENSP00000227524 | ENSP00000334100 |
| ENSP00000227524 | ENSP00000335321 |
| ENSP00000227524 | ENSP00000339090 |
| ENSP00000227524 | ENSP00000339095 |
| ENSP00000227524 | ENSP00000339145 |
| ENSP00000227524 | ENSP00000342374 |
| ENSP00000227524 | ENSP00000343557 |
| ENSP00000227524 | ENSP00000343701 |
| ENSP00000227524 | ENSP00000344241 |
| ENSP00000227524 | ENSP00000344741 |
| ENSP00000227524 | ENSP00000345917 |
| ENSP00000227524 | ENSP00000346236 |
| ENSP00000227524 | ENSP00000346986 |
| ENSP00000227524 | ENSP00000348010 |
| ENSP00000227524 | ENSP00000351137 |
| ENSP00000227524 | ENSP00000351284 |
| ENSP00000227524 | ENSP00000351947 |
| ENSP00000227524 | ENSP00000352308 |
| ENSP00000227524 | ENSP00000354340 |
| ENSP00000227524 | ENSP00000355050 |
| ENSP00000227524 | ENSP00000356541 |
| ENSP00000227524 | ENSP00000357631 |
| ENSP00000227524 | ENSP00000358554 |
| ENSP00000227524 | ENSP00000360216 |
| ENSP00000227524 | ENSP00000360497 |
| ENSP00000227524 | ENSP00000360532 |
| ENSP00000227524 | ENSP00000360777 |
| ENSP00000227524 | ENSP00000361557 |
| ENSP00000227524 | ENSP00000361577 |
| ENSP00000227524 | ENSP00000361616 |
| ENSP00000227524 | ENSP00000362110 |
| ENSP00000227524 | ENSP00000362115 |

|                 |                 |
|-----------------|-----------------|
| ENSP00000227524 | ENSP00000362900 |
| ENSP00000227524 | ENSP00000362936 |
| ENSP00000227524 | ENSP00000363308 |
| ENSP00000227524 | ENSP00000363313 |
| ENSP00000227524 | ENSP00000363734 |
| ENSP00000227524 | ENSP00000364270 |
| ENSP00000227524 | ENSP00000364289 |
| ENSP00000227524 | ENSP00000364813 |
| ENSP00000227524 | ENSP00000366557 |
| ENSP00000227524 | ENSP00000366607 |
| ENSP00000227524 | ENSP00000366829 |
| ENSP00000227524 | ENSP00000367439 |
| ENSP00000227524 | ENSP00000370460 |
| ENSP00000227524 | ENSP00000373354 |
| ENSP00000227524 | ENSP00000376973 |
| ENSP00000227524 | ENSP00000377262 |
| ENSP00000227524 | ENSP00000379607 |
| ENSP00000227524 | ENSP00000384534 |
| ENSP00000227524 | ENSP00000385903 |
| ENSP00000227524 | ENSP00000387006 |
| ENSP00000227524 | ENSP00000391432 |
| ENSP00000227524 | ENSP00000396937 |
| ENSP00000227524 | ENSP00000397435 |
| ENSP00000227524 | ENSP00000400591 |
| ENSP00000227524 | ENSP00000404151 |
| ENSP00000227524 | ENSP00000412566 |
| ENSP00000227524 | ENSP00000414006 |
| ENSP00000227524 | ENSP00000414634 |
| ENSP00000227618 | ENSP00000318775 |
| ENSP00000227638 | ENSP00000419952 |
| ENSP00000227667 | ENSP00000295897 |
| ENSP00000227667 | ENSP00000314615 |
| ENSP00000227752 | ENSP00000315768 |
| ENSP00000227752 | ENSP00000341208 |
| ENSP00000227752 | ENSP00000359206 |
| ENSP00000227752 | ENSP00000412237 |
| ENSP00000227758 | ENSP00000228318 |
| ENSP00000227758 | ENSP00000245912 |
| ENSP00000227758 | ENSP00000250113 |
| ENSP00000227758 | ENSP00000251968 |
| ENSP00000227758 | ENSP00000253003 |
| ENSP00000227758 | ENSP00000253462 |
| ENSP00000227758 | ENSP00000256442 |
| ENSP00000227758 | ENSP00000259075 |
| ENSP00000227758 | ENSP00000259808 |
| ENSP00000227758 | ENSP00000264193 |

|                 |                 |
|-----------------|-----------------|
| ENSP00000227758 | ENSP00000264552 |
| ENSP00000227758 | ENSP00000266087 |
| ENSP00000227758 | ENSP00000267169 |
| ENSP00000227758 | ENSP00000294119 |
| ENSP00000227758 | ENSP00000296328 |
| ENSP00000227758 | ENSP00000298743 |
| ENSP00000227758 | ENSP00000299601 |
| ENSP00000227758 | ENSP00000299767 |
| ENSP00000227758 | ENSP00000300589 |
| ENSP00000227758 | ENSP00000306906 |
| ENSP00000227758 | ENSP00000309595 |
| ENSP00000227758 | ENSP00000314132 |
| ENSP00000227758 | ENSP00000314733 |
| ENSP00000227758 | ENSP00000319673 |
| ENSP00000227758 | ENSP00000326366 |
| ENSP00000227758 | ENSP00000326579 |
| ENSP00000227758 | ENSP00000326737 |
| ENSP00000227758 | ENSP00000332454 |
| ENSP00000227758 | ENSP00000335657 |
| ENSP00000227758 | ENSP00000340935 |
| ENSP00000227758 | ENSP00000341268 |
| ENSP00000227758 | ENSP00000345341 |
| ENSP00000227758 | ENSP00000353059 |
| ENSP00000227758 | ENSP00000354822 |
| ENSP00000227758 | ENSP00000355028 |
| ENSP00000227758 | ENSP00000358335 |
| ENSP00000227758 | ENSP00000358997 |
| ENSP00000227758 | ENSP00000363089 |
| ENSP00000227758 | ENSP00000363095 |
| ENSP00000227758 | ENSP00000363680 |
| ENSP00000227758 | ENSP00000368646 |
| ENSP00000227758 | ENSP00000380921 |
| ENSP00000227758 | ENSP00000381863 |
| ENSP00000227758 | ENSP00000381891 |
| ENSP00000227758 | ENSP00000382423 |
| ENSP00000227758 | ENSP00000401980 |
| ENSP00000227880 | ENSP00000344648 |
| ENSP00000227880 | ENSP00000361990 |
| ENSP00000227880 | ENSP00000396068 |
| ENSP00000228027 | ENSP00000244051 |
| ENSP00000228027 | ENSP00000261596 |
| ENSP00000228027 | ENSP00000264005 |
| ENSP00000228027 | ENSP00000265052 |
| ENSP00000228027 | ENSP00000290949 |
| ENSP00000228027 | ENSP00000292566 |
| ENSP00000228027 | ENSP00000325518 |

|                 |                 |
|-----------------|-----------------|
| ENSP00000228027 | ENSP00000332258 |
| ENSP00000228027 | ENSP00000356591 |
| ENSP00000228027 | ENSP00000358777 |
| ENSP00000228027 | ENSP00000359380 |
| ENSP00000228027 | ENSP00000361667 |
| ENSP00000228136 | ENSP00000261368 |
| ENSP00000228136 | ENSP00000294008 |
| ENSP00000228136 | ENSP00000307491 |
| ENSP00000228136 | ENSP00000335321 |
| ENSP00000228251 | ENSP00000240055 |
| ENSP00000228251 | ENSP00000261531 |
| ENSP00000228251 | ENSP00000269385 |
| ENSP00000228251 | ENSP00000281537 |
| ENSP00000228251 | ENSP00000296930 |
| ENSP00000228251 | ENSP00000308546 |
| ENSP00000228251 | ENSP00000326261 |
| ENSP00000228251 | ENSP00000339145 |
| ENSP00000228251 | ENSP00000355675 |
| ENSP00000228251 | ENSP00000360876 |
| ENSP00000228251 | ENSP00000369871 |
| ENSP00000228251 | ENSP00000379607 |
| ENSP00000228251 | ENSP00000381657 |
| ENSP00000228280 | ENSP00000250340 |
| ENSP00000228280 | ENSP00000296871 |
| ENSP00000228280 | ENSP00000340305 |
| ENSP00000228284 | ENSP00000240316 |
| ENSP00000228284 | ENSP00000248114 |
| ENSP00000228284 | ENSP00000252622 |
| ENSP00000228284 | ENSP00000256857 |
| ENSP00000228284 | ENSP00000261531 |
| ENSP00000228284 | ENSP00000263413 |
| ENSP00000228284 | ENSP00000263736 |
| ENSP00000228284 | ENSP00000264951 |
| ENSP00000228284 | ENSP00000266079 |
| ENSP00000228284 | ENSP00000267163 |
| ENSP00000228284 | ENSP00000268483 |
| ENSP00000228284 | ENSP00000274473 |
| ENSP00000228284 | ENSP00000274712 |
| ENSP00000228284 | ENSP00000284719 |
| ENSP00000228284 | ENSP00000300146 |
| ENSP00000228284 | ENSP00000300413 |
| ENSP00000228284 | ENSP00000301740 |
| ENSP00000228284 | ENSP00000302160 |
| ENSP00000228284 | ENSP00000304370 |
| ENSP00000228284 | ENSP00000308546 |
| ENSP00000228284 | ENSP00000310596 |



|                 |                 |
|-----------------|-----------------|
| ENSP00000228284 | ENSP00000310723 |
| ENSP00000228284 | ENSP00000312981 |
| ENSP00000228284 | ENSP00000313674 |
| ENSP00000228284 | ENSP00000315379 |
| ENSP00000228284 | ENSP00000315859 |
| ENSP00000228284 | ENSP00000319341 |
| ENSP00000228284 | ENSP00000320251 |
| ENSP00000228284 | ENSP00000324122 |
| ENSP00000228284 | ENSP00000329466 |
| ENSP00000228284 | ENSP00000334148 |
| ENSP00000228284 | ENSP00000344220 |
| ENSP00000228284 | ENSP00000348565 |
| ENSP00000228284 | ENSP00000351490 |
| ENSP00000228284 | ENSP00000355899 |
| ENSP00000228284 | ENSP00000363313 |
| ENSP00000228284 | ENSP00000367265 |
| ENSP00000228284 | ENSP00000379457 |
| ENSP00000228284 | ENSP00000402338 |
| ENSP00000228284 | ENSP00000410396 |
| ENSP00000228284 | ENSP00000410758 |
| ENSP00000228284 | ENSP00000412566 |
| ENSP00000228284 | ENSP00000414006 |
| ENSP00000228284 | ENSP00000414634 |
| ENSP00000228284 | ENSP00000417229 |
| ENSP00000228307 | ENSP00000230449 |
| ENSP00000228307 | ENSP00000232458 |
| ENSP00000228307 | ENSP00000247226 |
| ENSP00000228307 | ENSP00000253861 |
| ENSP00000228307 | ENSP00000254051 |
| ENSP00000228307 | ENSP00000257430 |
| ENSP00000228307 | ENSP00000262304 |
| ENSP00000228307 | ENSP00000262995 |
| ENSP00000228307 | ENSP00000264093 |
| ENSP00000228307 | ENSP00000268182 |
| ENSP00000228307 | ENSP00000269122 |
| ENSP00000228307 | ENSP00000274376 |
| ENSP00000228307 | ENSP00000276416 |
| ENSP00000228307 | ENSP00000281171 |
| ENSP00000228307 | ENSP00000281172 |
| ENSP00000228307 | ENSP00000288602 |
| ENSP00000228307 | ENSP00000300574 |
| ENSP00000228307 | ENSP00000302478 |
| ENSP00000228307 | ENSP00000303507 |
| ENSP00000228307 | ENSP00000306124 |
| ENSP00000228307 | ENSP00000312506 |
| ENSP00000228307 | ENSP00000329140 |

|                 |                 |
|-----------------|-----------------|
| ENSP00000228307 | ENSP00000329623 |
| ENSP00000228307 | ENSP00000336740 |
| ENSP00000228307 | ENSP00000339933 |
| ENSP00000228307 | ENSP00000340944 |
| ENSP00000228307 | ENSP00000341189 |
| ENSP00000228307 | ENSP00000344220 |
| ENSP00000228307 | ENSP00000344666 |
| ENSP00000228307 | ENSP00000346839 |
| ENSP00000228307 | ENSP00000347134 |
| ENSP00000228307 | ENSP00000348602 |
| ENSP00000228307 | ENSP00000349824 |
| ENSP00000228307 | ENSP00000349959 |
| ENSP00000228307 | ENSP00000350297 |
| ENSP00000228307 | ENSP00000351015 |
| ENSP00000228307 | ENSP00000351318 |
| ENSP00000228307 | ENSP00000354718 |
| ENSP00000228307 | ENSP00000355136 |
| ENSP00000228307 | ENSP00000355296 |
| ENSP00000228307 | ENSP00000356346 |
| ENSP00000228307 | ENSP00000363763 |
| ENSP00000228307 | ENSP00000364893 |
| ENSP00000228307 | ENSP00000364898 |
| ENSP00000228307 | ENSP00000370719 |
| ENSP00000228307 | ENSP00000371236 |
| ENSP00000228307 | ENSP00000371897 |
| ENSP00000228307 | ENSP00000377047 |
| ENSP00000228307 | ENSP00000378338 |
| ENSP00000228307 | ENSP00000380942 |
| ENSP00000228307 | ENSP00000383623 |
| ENSP00000228307 | ENSP00000402240 |
| ENSP00000228318 | ENSP00000229379 |
| ENSP00000228318 | ENSP00000231706 |
| ENSP00000228318 | ENSP00000237530 |
| ENSP00000228318 | ENSP00000245796 |
| ENSP00000228318 | ENSP00000251864 |
| ENSP00000228318 | ENSP00000252487 |
| ENSP00000228318 | ENSP00000256216 |
| ENSP00000228318 | ENSP00000258886 |
| ENSP00000228318 | ENSP00000259569 |
| ENSP00000228318 | ENSP00000260102 |
| ENSP00000228318 | ENSP00000260443 |
| ENSP00000228318 | ENSP00000262215 |
| ENSP00000228318 | ENSP00000262982 |
| ENSP00000228318 | ENSP00000264705 |
| ENSP00000228318 | ENSP00000265351 |
| ENSP00000228318 | ENSP00000268379 |

|                 |                 |
|-----------------|-----------------|
| ENSP00000228318 | ENSP00000268668 |
| ENSP00000228318 | ENSP00000277865 |
| ENSP00000228318 | ENSP00000282541 |
| ENSP00000228318 | ENSP00000290429 |
| ENSP00000228318 | ENSP00000294724 |
| ENSP00000228318 | ENSP00000301585 |
| ENSP00000228318 | ENSP00000302790 |
| ENSP00000228318 | ENSP00000302896 |
| ENSP00000228318 | ENSP00000304592 |
| ENSP00000228318 | ENSP00000305653 |
| ENSP00000228318 | ENSP00000308944 |
| ENSP00000228318 | ENSP00000309595 |
| ENSP00000228318 | ENSP00000311505 |
| ENSP00000228318 | ENSP00000311766 |
| ENSP00000228318 | ENSP00000314036 |
| ENSP00000228318 | ENSP00000314380 |
| ENSP00000228318 | ENSP00000317159 |
| ENSP00000228318 | ENSP00000324127 |
| ENSP00000228318 | ENSP00000336712 |
| ENSP00000228318 | ENSP00000341838 |
| ENSP00000228318 | ENSP00000342026 |
| ENSP00000228318 | ENSP00000346453 |
| ENSP00000228318 | ENSP00000349142 |
| ENSP00000228318 | ENSP00000350012 |
| ENSP00000228318 | ENSP00000351885 |
| ENSP00000228318 | ENSP00000355518 |
| ENSP00000228318 | ENSP00000355890 |
| ENSP00000228318 | ENSP00000357880 |
| ENSP00000228318 | ENSP00000357998 |
| ENSP00000228318 | ENSP00000358478 |
| ENSP00000228318 | ENSP00000359000 |
| ENSP00000228318 | ENSP00000359526 |
| ENSP00000228318 | ENSP00000360327 |
| ENSP00000228318 | ENSP00000361207 |
| ENSP00000228318 | ENSP00000362306 |
| ENSP00000228318 | ENSP00000364649 |
| ENSP00000228318 | ENSP00000366482 |
| ENSP00000228318 | ENSP00000368646 |
| ENSP00000228318 | ENSP00000369042 |
| ENSP00000228318 | ENSP00000377280 |
| ENSP00000228318 | ENSP00000377527 |
| ENSP00000228318 | ENSP00000377640 |
| ENSP00000228318 | ENSP00000379712 |
| ENSP00000228318 | ENSP00000381237 |
| ENSP00000228318 | ENSP00000383719 |
| ENSP00000228318 | ENSP00000386239 |

|                 |                 |
|-----------------|-----------------|
| ENSP00000228318 | ENSP00000387262 |
| ENSP00000228318 | ENSP00000394382 |
| ENSP00000228318 | ENSP00000408236 |
| ENSP00000228425 | ENSP00000380921 |
| ENSP00000228425 | ENSP00000388373 |
| ENSP00000228437 | ENSP00000258106 |
| ENSP00000228437 | ENSP00000350633 |
| ENSP00000228476 | ENSP00000254101 |
| ENSP00000228476 | ENSP00000365103 |
| ENSP00000228476 | ENSP00000374280 |
| ENSP00000228510 | ENSP00000251038 |
| ENSP00000228510 | ENSP00000276603 |
| ENSP00000228510 | ENSP00000282841 |
| ENSP00000228510 | ENSP00000318604 |
| ENSP00000228510 | ENSP00000339933 |
| ENSP00000228510 | ENSP00000350249 |
| ENSP00000228510 | ENSP00000356591 |
| ENSP00000228510 | ENSP00000381031 |
| ENSP00000228534 | ENSP00000231228 |
| ENSP00000228534 | ENSP00000314425 |
| ENSP00000228534 | ENSP00000321345 |
| ENSP00000228705 | ENSP00000393596 |
| ENSP00000228799 | ENSP00000337850 |
| ENSP00000228799 | ENSP00000371341 |
| ENSP00000228811 | ENSP00000302021 |
| ENSP00000228825 | ENSP00000251038 |
| ENSP00000228825 | ENSP00000252725 |
| ENSP00000228825 | ENSP00000253083 |
| ENSP00000228825 | ENSP00000259477 |
| ENSP00000228825 | ENSP00000260956 |
| ENSP00000228825 | ENSP00000261017 |
| ENSP00000228825 | ENSP00000261534 |
| ENSP00000228825 | ENSP00000273398 |
| ENSP00000228825 | ENSP00000286091 |
| ENSP00000228825 | ENSP00000287598 |
| ENSP00000228825 | ENSP00000295685 |
| ENSP00000228825 | ENSP00000298852 |
| ENSP00000228825 | ENSP00000299626 |
| ENSP00000228825 | ENSP00000301843 |
| ENSP00000228825 | ENSP00000302530 |
| ENSP00000228825 | ENSP00000310129 |
| ENSP00000228825 | ENSP00000317334 |
| ENSP00000228825 | ENSP00000320924 |
| ENSP00000228825 | ENSP00000326238 |
| ENSP00000228825 | ENSP00000338727 |
| ENSP00000228825 | ENSP00000352802 |

|                 |                 |
|-----------------|-----------------|
| ENSP00000228825 | ENSP00000354125 |
| ENSP00000228825 | ENSP00000358994 |
| ENSP00000228825 | ENSP00000359067 |
| ENSP00000228825 | ENSP00000360149 |
| ENSP00000228825 | ENSP00000362744 |
| ENSP00000228825 | ENSP00000365147 |
| ENSP00000228825 | ENSP00000365891 |
| ENSP00000228825 | ENSP00000367841 |
| ENSP00000228825 | ENSP00000370517 |
| ENSP00000228825 | ENSP00000375857 |
| ENSP00000228825 | ENSP00000380431 |
| ENSP00000228825 | ENSP00000382177 |
| ENSP00000228825 | ENSP00000386878 |
| ENSP00000228825 | ENSP00000391723 |
| ENSP00000228825 | ENSP00000417229 |
| ENSP00000228843 | ENSP00000261584 |
| ENSP00000228843 | ENSP00000307491 |
| ENSP00000228862 | ENSP00000306245 |
| ENSP00000228862 | ENSP00000364320 |
| ENSP00000228862 | ENSP00000365439 |
| ENSP00000228862 | ENSP00000367029 |
| ENSP00000228865 | ENSP00000265372 |
| ENSP00000228865 | ENSP00000295899 |
| ENSP00000228865 | ENSP00000304185 |
| ENSP00000228865 | ENSP00000362094 |
| ENSP00000228872 | ENSP00000231487 |
| ENSP00000228872 | ENSP00000234160 |
| ENSP00000228872 | ENSP00000244741 |
| ENSP00000228872 | ENSP00000247970 |
| ENSP00000228872 | ENSP00000255465 |
| ENSP00000228872 | ENSP00000256442 |
| ENSP00000228872 | ENSP00000257430 |
| ENSP00000228872 | ENSP00000262643 |
| ENSP00000228872 | ENSP00000264335 |
| ENSP00000228872 | ENSP00000267163 |
| ENSP00000228872 | ENSP00000274255 |
| ENSP00000228872 | ENSP00000298552 |
| ENSP00000228872 | ENSP00000301764 |
| ENSP00000228872 | ENSP00000311083 |
| ENSP00000228872 | ENSP00000321239 |
| ENSP00000228872 | ENSP00000328287 |
| ENSP00000228872 | ENSP00000330074 |
| ENSP00000228872 | ENSP00000335628 |
| ENSP00000228872 | ENSP00000338413 |
| ENSP00000228872 | ENSP00000343701 |
| ENSP00000228872 | ENSP00000345895 |

|                 |                 |
|-----------------|-----------------|
| ENSP00000228872 | ENSP00000350512 |
| ENSP00000228872 | ENSP00000360821 |
| ENSP00000228872 | ENSP00000381045 |
| ENSP00000228916 | ENSP00000251968 |
| ENSP00000228916 | ENSP00000260187 |
| ENSP00000228916 | ENSP00000331201 |
| ENSP00000228916 | ENSP00000345530 |
| ENSP00000228916 | ENSP00000359688 |
| ENSP00000228916 | ENSP00000379228 |
| ENSP00000228928 | ENSP00000310042 |
| ENSP00000228928 | ENSP00000345917 |
| ENSP00000228928 | ENSP00000354040 |
| ENSP00000228928 | ENSP00000354522 |
| ENSP00000228928 | ENSP00000361949 |
| ENSP00000228928 | ENSP00000363559 |
| ENSP00000228928 | ENSP00000392601 |
| ENSP00000228928 | ENSP00000401980 |
| ENSP00000228955 | ENSP00000247219 |
| ENSP00000228955 | ENSP00000247843 |
| ENSP00000228955 | ENSP00000251038 |
| ENSP00000228955 | ENSP00000256897 |
| ENSP00000228955 | ENSP00000259895 |
| ENSP00000228955 | ENSP00000261245 |
| ENSP00000228955 | ENSP00000263857 |
| ENSP00000228955 | ENSP00000264157 |
| ENSP00000228955 | ENSP00000265963 |
| ENSP00000228955 | ENSP00000278412 |
| ENSP00000228955 | ENSP00000283875 |
| ENSP00000228955 | ENSP00000285398 |
| ENSP00000228955 | ENSP00000295926 |
| ENSP00000228955 | ENSP00000296328 |
| ENSP00000228955 | ENSP00000306983 |
| ENSP00000228955 | ENSP00000314949 |
| ENSP00000228955 | ENSP00000325448 |
| ENSP00000228955 | ENSP00000329029 |
| ENSP00000228955 | ENSP00000340823 |
| ENSP00000228955 | ENSP00000348168 |
| ENSP00000228955 | ENSP00000359531 |
| ENSP00000228955 | ENSP00000367406 |
| ENSP00000228955 | ENSP00000369695 |
| ENSP00000228955 | ENSP00000374529 |
| ENSP00000228955 | ENSP00000375809 |
| ENSP00000228955 | ENSP00000377969 |
| ENSP00000229003 | ENSP00000304903 |
| ENSP00000229135 | ENSP00000290158 |
| ENSP00000229135 | ENSP00000290219 |

|                 |                 |
|-----------------|-----------------|
| ENSP00000229135 | ENSP00000343701 |
| ENSP00000229135 | ENSP00000356713 |
| ENSP00000229179 | ENSP00000229595 |
| ENSP00000229179 | ENSP00000231498 |
| ENSP00000229179 | ENSP00000233146 |
| ENSP00000229179 | ENSP00000234420 |
| ENSP00000229179 | ENSP00000234827 |
| ENSP00000229179 | ENSP00000240159 |
| ENSP00000229179 | ENSP00000245544 |
| ENSP00000229179 | ENSP00000247815 |
| ENSP00000229179 | ENSP00000247970 |
| ENSP00000229179 | ENSP00000248566 |
| ENSP00000229179 | ENSP00000251074 |
| ENSP00000229179 | ENSP00000260327 |
| ENSP00000229179 | ENSP00000261396 |
| ENSP00000229179 | ENSP00000261531 |
| ENSP00000229179 | ENSP00000261596 |
| ENSP00000229179 | ENSP00000261881 |
| ENSP00000229179 | ENSP00000262077 |
| ENSP00000229179 | ENSP00000262315 |
| ENSP00000229179 | ENSP00000262765 |
| ENSP00000229179 | ENSP00000263390 |
| ENSP00000229179 | ENSP00000264883 |
| ENSP00000229179 | ENSP00000265081 |
| ENSP00000229179 | ENSP00000265304 |
| ENSP00000229179 | ENSP00000265351 |
| ENSP00000229179 | ENSP00000268043 |
| ENSP00000229179 | ENSP00000283195 |
| ENSP00000229179 | ENSP00000285243 |
| ENSP00000229179 | ENSP00000285968 |
| ENSP00000229179 | ENSP00000288774 |
| ENSP00000229179 | ENSP00000290158 |
| ENSP00000229179 | ENSP00000291688 |
| ENSP00000229179 | ENSP00000296411 |
| ENSP00000229179 | ENSP00000298139 |
| ENSP00000229179 | ENSP00000302790 |
| ENSP00000229179 | ENSP00000302886 |
| ENSP00000229179 | ENSP00000305503 |
| ENSP00000229179 | ENSP00000308622 |
| ENSP00000229179 | ENSP00000310668 |
| ENSP00000229179 | ENSP00000311873 |
| ENSP00000229179 | ENSP00000313171 |
| ENSP00000229179 | ENSP00000315700 |
| ENSP00000229179 | ENSP00000316032 |
| ENSP00000229179 | ENSP00000318977 |
| ENSP00000229179 | ENSP00000322180 |

|                 |                 |
|-----------------|-----------------|
| ENSP00000229179 | ENSP00000322218 |
| ENSP00000229179 | ENSP00000322242 |
| ENSP00000229179 | ENSP00000322396 |
| ENSP00000229179 | ENSP00000325312 |
| ENSP00000229179 | ENSP00000325863 |
| ENSP00000229179 | ENSP00000329466 |
| ENSP00000229179 | ENSP00000331310 |
| ENSP00000229179 | ENSP00000342262 |
| ENSP00000229179 | ENSP00000343701 |
| ENSP00000229179 | ENSP00000344460 |
| ENSP00000229179 | ENSP00000347232 |
| ENSP00000229179 | ENSP00000347329 |
| ENSP00000229179 | ENSP00000351284 |
| ENSP00000229179 | ENSP00000352021 |
| ENSP00000229179 | ENSP00000352400 |
| ENSP00000229179 | ENSP00000354522 |
| ENSP00000229179 | ENSP00000355185 |
| ENSP00000229179 | ENSP00000355560 |
| ENSP00000229179 | ENSP00000355922 |
| ENSP00000229179 | ENSP00000356448 |
| ENSP00000229179 | ENSP00000360268 |
| ENSP00000229179 | ENSP00000360286 |
| ENSP00000229179 | ENSP00000360532 |
| ENSP00000229179 | ENSP00000365811 |
| ENSP00000229179 | ENSP00000367721 |
| ENSP00000229179 | ENSP00000368959 |
| ENSP00000229179 | ENSP00000370150 |
| ENSP00000229179 | ENSP00000370151 |
| ENSP00000229179 | ENSP00000373715 |
| ENSP00000229179 | ENSP00000377793 |
| ENSP00000229179 | ENSP00000382779 |
| ENSP00000229179 | ENSP00000406293 |
| ENSP00000229179 | ENSP00000414321 |
| ENSP00000229195 | ENSP00000233078 |
| ENSP00000229195 | ENSP00000240185 |
| ENSP00000229195 | ENSP00000247219 |
| ENSP00000229195 | ENSP00000251038 |
| ENSP00000229195 | ENSP00000252115 |
| ENSP00000229195 | ENSP00000253363 |
| ENSP00000229195 | ENSP00000256897 |
| ENSP00000229195 | ENSP00000261741 |
| ENSP00000229195 | ENSP00000261951 |
| ENSP00000229195 | ENSP00000262077 |
| ENSP00000229195 | ENSP00000263576 |
| ENSP00000229195 | ENSP00000263857 |
| ENSP00000229195 | ENSP00000264157 |



|                 |                 |
|-----------------|-----------------|
| ENSP00000229195 | ENSP00000268957 |
| ENSP00000229195 | ENSP00000273064 |
| ENSP00000229195 | ENSP00000276072 |
| ENSP00000229195 | ENSP00000285896 |
| ENSP00000229195 | ENSP00000295926 |
| ENSP00000229195 | ENSP00000296328 |
| ENSP00000229195 | ENSP00000296509 |
| ENSP00000229195 | ENSP00000300146 |
| ENSP00000229195 | ENSP00000301764 |
| ENSP00000229195 | ENSP00000311343 |
| ENSP00000229195 | ENSP00000314949 |
| ENSP00000229195 | ENSP00000320949 |
| ENSP00000229195 | ENSP00000325376 |
| ENSP00000229195 | ENSP00000330060 |
| ENSP00000229195 | ENSP00000331817 |
| ENSP00000229195 | ENSP00000331879 |
| ENSP00000229195 | ENSP00000332444 |
| ENSP00000229195 | ENSP00000346120 |
| ENSP00000229195 | ENSP00000348551 |
| ENSP00000229195 | ENSP00000354673 |
| ENSP00000229195 | ENSP00000354995 |
| ENSP00000229195 | ENSP00000355051 |
| ENSP00000229195 | ENSP00000356448 |
| ENSP00000229195 | ENSP00000357907 |
| ENSP00000229195 | ENSP00000361005 |
| ENSP00000229195 | ENSP00000361287 |
| ENSP00000229195 | ENSP00000361949 |
| ENSP00000229195 | ENSP00000362532 |
| ENSP00000229195 | ENSP00000362900 |
| ENSP00000229195 | ENSP00000366135 |
| ENSP00000229195 | ENSP00000368984 |
| ENSP00000229195 | ENSP00000369965 |
| ENSP00000229195 | ENSP00000374529 |
| ENSP00000229201 | ENSP00000234296 |
| ENSP00000229201 | ENSP00000234626 |
| ENSP00000229201 | ENSP00000247815 |
| ENSP00000229201 | ENSP00000248114 |
| ENSP00000229201 | ENSP00000249636 |
| ENSP00000229201 | ENSP00000251038 |
| ENSP00000229201 | ENSP00000253462 |
| ENSP00000229201 | ENSP00000254719 |
| ENSP00000229201 | ENSP00000258052 |
| ENSP00000229201 | ENSP00000260731 |
| ENSP00000229201 | ENSP00000261396 |
| ENSP00000229201 | ENSP00000261424 |
| ENSP00000229201 | ENSP00000261881 |

|                 |                 |
|-----------------|-----------------|
| ENSP00000229201 | ENSP00000262315 |
| ENSP00000229201 | ENSP00000262367 |
| ENSP00000229201 | ENSP00000262518 |
| ENSP00000229201 | ENSP00000263201 |
| ENSP00000229201 | ENSP00000264552 |
| ENSP00000229201 | ENSP00000264926 |
| ENSP00000229201 | ENSP00000265056 |
| ENSP00000229201 | ENSP00000265728 |
| ENSP00000229201 | ENSP00000267430 |
| ENSP00000229201 | ENSP00000268043 |
| ENSP00000229201 | ENSP00000276533 |
| ENSP00000229201 | ENSP00000282326 |
| ENSP00000229201 | ENSP00000287239 |
| ENSP00000229201 | ENSP00000287598 |
| ENSP00000229201 | ENSP00000290231 |
| ENSP00000229201 | ENSP00000296273 |
| ENSP00000229201 | ENSP00000297338 |
| ENSP00000229201 | ENSP00000298139 |
| ENSP00000229201 | ENSP00000302530 |
| ENSP00000229201 | ENSP00000302955 |
| ENSP00000229201 | ENSP00000307853 |
| ENSP00000229201 | ENSP00000308699 |
| ENSP00000229201 | ENSP00000310520 |
| ENSP00000229201 | ENSP00000312870 |
| ENSP00000229201 | ENSP00000312995 |
| ENSP00000229201 | ENSP00000313171 |
| ENSP00000229201 | ENSP00000314420 |
| ENSP00000229201 | ENSP00000316032 |
| ENSP00000229201 | ENSP00000317039 |
| ENSP00000229201 | ENSP00000317636 |
| ENSP00000229201 | ENSP00000318977 |
| ENSP00000229201 | ENSP00000321636 |
| ENSP00000229201 | ENSP00000322180 |
| ENSP00000229201 | ENSP00000322570 |
| ENSP00000229201 | ENSP00000323099 |
| ENSP00000229201 | ENSP00000323663 |
| ENSP00000229201 | ENSP00000325863 |
| ENSP00000229201 | ENSP00000334474 |
| ENSP00000229201 | ENSP00000336606 |
| ENSP00000229201 | ENSP00000336868 |
| ENSP00000229201 | ENSP00000340879 |
| ENSP00000229201 | ENSP00000341382 |
| ENSP00000229201 | ENSP00000343741 |
| ENSP00000229201 | ENSP00000347232 |
| ENSP00000229201 | ENSP00000351284 |
| ENSP00000229201 | ENSP00000351697 |

|                 |                 |
|-----------------|-----------------|
| ENSP00000229201 | ENSP00000353793 |
| ENSP00000229201 | ENSP00000354522 |
| ENSP00000229201 | ENSP00000354720 |
| ENSP00000229201 | ENSP00000354957 |
| ENSP00000229201 | ENSP00000355388 |
| ENSP00000229201 | ENSP00000355922 |
| ENSP00000229201 | ENSP00000360116 |
| ENSP00000229201 | ENSP00000360621 |
| ENSP00000229201 | ENSP00000365588 |
| ENSP00000229201 | ENSP00000366974 |
| ENSP00000229201 | ENSP00000368349 |
| ENSP00000229201 | ENSP00000368438 |
| ENSP00000229201 | ENSP00000369335 |
| ENSP00000229201 | ENSP00000369411 |
| ENSP00000229201 | ENSP00000370151 |
| ENSP00000229201 | ENSP00000371155 |
| ENSP00000229201 | ENSP00000371475 |
| ENSP00000229201 | ENSP00000372023 |
| ENSP00000229201 | ENSP00000373060 |
| ENSP00000229201 | ENSP00000374213 |
| ENSP00000229201 | ENSP00000380504 |
| ENSP00000229201 | ENSP00000384048 |
| ENSP00000229201 | ENSP00000387429 |
| ENSP00000229201 | ENSP00000396484 |
| ENSP00000229201 | ENSP00000404318 |
| ENSP00000229201 | ENSP00000409167 |
| ENSP00000229201 | ENSP00000413632 |
| ENSP00000229201 | ENSP00000415212 |
| ENSP00000229201 | ENSP00000416511 |
| ENSP00000229214 | ENSP00000230050 |
| ENSP00000229214 | ENSP00000230340 |
| ENSP00000229214 | ENSP00000232888 |
| ENSP00000229214 | ENSP00000237289 |
| ENSP00000229214 | ENSP00000238256 |
| ENSP00000229214 | ENSP00000241600 |
| ENSP00000229214 | ENSP00000244230 |
| ENSP00000229214 | ENSP00000244496 |
| ENSP00000229214 | ENSP00000245539 |
| ENSP00000229214 | ENSP00000245960 |
| ENSP00000229214 | ENSP00000253099 |
| ENSP00000229214 | ENSP00000253237 |
| ENSP00000229214 | ENSP00000254037 |
| ENSP00000229214 | ENSP00000256383 |
| ENSP00000229214 | ENSP00000256442 |
| ENSP00000229214 | ENSP00000257829 |
| ENSP00000229214 | ENSP00000258499 |

|                 |                 |
|-----------------|-----------------|
| ENSP00000229214 | ENSP00000261637 |
| ENSP00000229214 | ENSP00000261708 |
| ENSP00000229214 | ENSP00000261868 |
| ENSP00000229214 | ENSP00000262056 |
| ENSP00000229214 | ENSP00000262300 |
| ENSP00000229214 | ENSP00000262854 |
| ENSP00000229214 | ENSP00000262903 |
| ENSP00000229214 | ENSP00000263629 |
| ENSP00000229214 | ENSP00000268616 |
| ENSP00000229214 | ENSP00000268802 |
| ENSP00000229214 | ENSP00000269385 |
| ENSP00000229214 | ENSP00000269499 |
| ENSP00000229214 | ENSP00000270583 |
| ENSP00000229214 | ENSP00000270625 |
| ENSP00000229214 | ENSP00000272521 |
| ENSP00000229214 | ENSP00000274606 |
| ENSP00000229214 | ENSP00000274849 |
| ENSP00000229214 | ENSP00000276201 |
| ENSP00000229214 | ENSP00000278572 |
| ENSP00000229214 | ENSP00000283109 |
| ENSP00000229214 | ENSP00000286719 |
| ENSP00000229214 | ENSP00000291576 |
| ENSP00000229214 | ENSP00000296792 |
| ENSP00000229214 | ENSP00000296802 |
| ENSP00000229214 | ENSP00000297579 |
| ENSP00000229214 | ENSP00000297990 |
| ENSP00000229214 | ENSP00000298746 |
| ENSP00000229214 | ENSP00000301364 |
| ENSP00000229214 | ENSP00000302896 |
| ENSP00000229214 | ENSP00000305702 |
| ENSP00000229214 | ENSP00000308179 |
| ENSP00000229214 | ENSP00000311028 |
| ENSP00000229214 | ENSP00000311135 |
| ENSP00000229214 | ENSP00000311430 |
| ENSP00000229214 | ENSP00000314193 |
| ENSP00000229214 | ENSP00000314311 |
| ENSP00000229214 | ENSP00000314348 |
| ENSP00000229214 | ENSP00000315674 |
| ENSP00000229214 | ENSP00000317334 |
| ENSP00000229214 | ENSP00000318604 |
| ENSP00000229214 | ENSP00000318646 |
| ENSP00000229214 | ENSP00000320566 |
| ENSP00000229214 | ENSP00000320917 |
| ENSP00000229214 | ENSP00000324122 |
| ENSP00000229214 | ENSP00000325448 |
| ENSP00000229214 | ENSP00000326806 |

|                 |                 |
|-----------------|-----------------|
| ENSP00000229214 | ENSP00000326981 |
| ENSP00000229214 | ENSP00000327179 |
| ENSP00000229214 | ENSP00000328854 |
| ENSP00000229214 | ENSP00000329466 |
| ENSP00000229214 | ENSP00000337839 |
| ENSP00000229214 | ENSP00000339095 |
| ENSP00000229214 | ENSP00000339795 |
| ENSP00000229214 | ENSP00000340019 |
| ENSP00000229214 | ENSP00000346015 |
| ENSP00000229214 | ENSP00000346050 |
| ENSP00000229214 | ENSP00000346067 |
| ENSP00000229214 | ENSP00000346120 |
| ENSP00000229214 | ENSP00000348714 |
| ENSP00000229214 | ENSP00000350009 |
| ENSP00000229214 | ENSP00000355471 |
| ENSP00000229214 | ENSP00000355541 |
| ENSP00000229214 | ENSP00000356134 |
| ENSP00000229214 | ENSP00000356520 |
| ENSP00000229214 | ENSP00000358563 |
| ENSP00000229214 | ENSP00000358812 |
| ENSP00000229214 | ENSP00000360031 |
| ENSP00000229214 | ENSP00000360215 |
| ENSP00000229214 | ENSP00000361076 |
| ENSP00000229214 | ENSP00000361245 |
| ENSP00000229214 | ENSP00000361982 |
| ENSP00000229214 | ENSP00000362744 |
| ENSP00000229214 | ENSP00000363308 |
| ENSP00000229214 | ENSP00000363642 |
| ENSP00000229214 | ENSP00000363676 |
| ENSP00000229214 | ENSP00000363746 |
| ENSP00000229214 | ENSP00000364293 |
| ENSP00000229214 | ENSP00000364320 |
| ENSP00000229214 | ENSP00000365837 |
| ENSP00000229214 | ENSP00000366135 |
| ENSP00000229214 | ENSP00000366557 |
| ENSP00000229214 | ENSP00000366974 |
| ENSP00000229214 | ENSP00000368984 |
| ENSP00000229214 | ENSP00000370589 |
| ENSP00000229214 | ENSP00000371101 |
| ENSP00000229214 | ENSP00000371155 |
| ENSP00000229214 | ENSP00000372023 |
| ENSP00000229214 | ENSP00000372695 |
| ENSP00000229214 | ENSP00000374390 |
| ENSP00000229214 | ENSP00000376309 |
| ENSP00000229214 | ENSP00000376946 |
| ENSP00000229214 | ENSP00000377865 |

|                 |                 |
|-----------------|-----------------|
| ENSP00000229214 | ENSP00000379607 |
| ENSP00000229214 | ENSP00000379888 |
| ENSP00000229214 | ENSP00000380982 |
| ENSP00000229214 | ENSP00000381031 |
| ENSP00000229214 | ENSP00000384474 |
| ENSP00000229214 | ENSP00000386134 |
| ENSP00000229214 | ENSP00000389103 |
| ENSP00000229214 | ENSP00000391723 |
| ENSP00000229214 | ENSP00000399454 |
| ENSP00000229214 | ENSP00000401980 |
| ENSP00000229214 | ENSP00000402084 |
| ENSP00000229214 | ENSP00000402338 |
| ENSP00000229214 | ENSP00000402869 |
| ENSP00000229214 | ENSP00000405614 |
| ENSP00000229214 | ENSP00000416959 |
| ENSP00000229214 | ENSP00000417229 |
| ENSP00000229214 | ENSP00000420195 |
| ENSP00000229238 | ENSP00000301585 |
| ENSP00000229251 | ENSP00000261712 |
| ENSP00000229251 | ENSP00000264389 |
| ENSP00000229251 | ENSP00000268717 |
| ENSP00000229251 | ENSP00000299259 |
| ENSP00000229251 | ENSP00000301764 |
| ENSP00000229251 | ENSP00000302955 |
| ENSP00000229251 | ENSP00000304102 |
| ENSP00000229251 | ENSP00000304822 |
| ENSP00000229251 | ENSP00000333568 |
| ENSP00000229251 | ENSP00000335557 |
| ENSP00000229251 | ENSP00000346340 |
| ENSP00000229251 | ENSP00000350512 |
| ENSP00000229251 | ENSP00000354125 |
| ENSP00000229251 | ENSP00000356438 |
| ENSP00000229251 | ENSP00000357260 |
| ENSP00000229251 | ENSP00000417229 |
| ENSP00000229304 | ENSP00000257430 |
| ENSP00000229304 | ENSP00000287322 |
| ENSP00000229307 | ENSP00000233146 |
| ENSP00000229307 | ENSP00000243326 |
| ENSP00000229307 | ENSP00000247005 |
| ENSP00000229307 | ENSP00000247970 |
| ENSP00000229307 | ENSP00000251020 |
| ENSP00000229307 | ENSP00000251289 |
| ENSP00000229307 | ENSP00000256429 |
| ENSP00000229307 | ENSP00000257566 |
| ENSP00000229307 | ENSP00000263360 |
| ENSP00000229307 | ENSP00000264709 |

|                 |                 |
|-----------------|-----------------|
| ENSP00000229307 | ENSP00000268058 |
| ENSP00000229307 | ENSP00000272134 |
| ENSP00000229307 | ENSP00000294740 |
| ENSP00000229307 | ENSP00000295901 |
| ENSP00000229307 | ENSP00000296273 |
| ENSP00000229307 | ENSP00000297792 |
| ENSP00000229307 | ENSP00000298767 |
| ENSP00000229307 | ENSP00000311816 |
| ENSP00000229307 | ENSP00000319169 |
| ENSP00000229307 | ENSP00000322915 |
| ENSP00000229307 | ENSP00000333633 |
| ENSP00000229307 | ENSP00000342307 |
| ENSP00000229307 | ENSP00000349049 |
| ENSP00000229307 | ENSP00000349213 |
| ENSP00000229307 | ENSP00000350094 |
| ENSP00000229307 | ENSP00000350708 |
| ENSP00000229307 | ENSP00000351250 |
| ENSP00000229307 | ENSP00000351490 |
| ENSP00000229307 | ENSP00000351552 |
| ENSP00000229307 | ENSP00000353622 |
| ENSP00000229307 | ENSP00000359567 |
| ENSP00000229307 | ENSP00000360621 |
| ENSP00000229307 | ENSP00000362592 |
| ENSP00000229307 | ENSP00000363089 |
| ENSP00000229307 | ENSP00000363193 |
| ENSP00000229307 | ENSP00000368253 |
| ENSP00000229307 | ENSP00000381657 |
| ENSP00000229314 | ENSP00000236192 |
| ENSP00000229314 | ENSP00000238831 |
| ENSP00000229314 | ENSP00000251038 |
| ENSP00000229314 | ENSP00000262812 |
| ENSP00000229314 | ENSP00000265175 |
| ENSP00000229314 | ENSP00000271375 |
| ENSP00000229314 | ENSP00000286448 |
| ENSP00000229314 | ENSP00000295119 |
| ENSP00000229314 | ENSP00000305459 |
| ENSP00000229314 | ENSP00000310003 |
| ENSP00000229314 | ENSP00000310521 |
| ENSP00000229314 | ENSP00000327716 |
| ENSP00000229314 | ENSP00000328079 |
| ENSP00000229314 | ENSP00000329419 |
| ENSP00000229314 | ENSP00000336724 |
| ENSP00000229314 | ENSP00000349887 |
| ENSP00000229314 | ENSP00000355308 |
| ENSP00000229314 | ENSP00000359305 |
| ENSP00000229314 | ENSP00000366225 |

|                 |                 |
|-----------------|-----------------|
| ENSP00000229314 | ENSP00000381293 |
| ENSP00000229314 | ENSP00000390783 |
| ENSP00000229314 | ENSP00000397441 |
| ENSP00000229379 | ENSP00000247655 |
| ENSP00000229379 | ENSP00000258424 |
| ENSP00000229379 | ENSP00000262077 |
| ENSP00000229379 | ENSP00000268379 |
| ENSP00000229379 | ENSP00000274787 |
| ENSP00000229379 | ENSP00000287022 |
| ENSP00000229379 | ENSP00000297564 |
| ENSP00000229379 | ENSP00000307786 |
| ENSP00000229379 | ENSP00000309565 |
| ENSP00000229379 | ENSP00000317159 |
| ENSP00000229379 | ENSP00000317780 |
| ENSP00000229379 | ENSP00000332887 |
| ENSP00000229379 | ENSP00000354499 |
| ENSP00000229379 | ENSP00000354554 |
| ENSP00000229379 | ENSP00000354876 |
| ENSP00000229379 | ENSP00000354982 |
| ENSP00000229379 | ENSP00000355572 |
| ENSP00000229379 | ENSP00000360782 |
| ENSP00000229379 | ENSP00000367934 |
| ENSP00000229395 | ENSP00000230056 |
| ENSP00000229395 | ENSP00000265148 |
| ENSP00000229395 | ENSP00000267807 |
| ENSP00000229395 | ENSP00000271715 |
| ENSP00000229395 | ENSP00000275780 |
| ENSP00000229395 | ENSP00000278572 |
| ENSP00000229395 | ENSP00000295951 |
| ENSP00000229395 | ENSP00000298317 |
| ENSP00000229395 | ENSP00000301019 |
| ENSP00000229395 | ENSP00000315702 |
| ENSP00000229395 | ENSP00000322915 |
| ENSP00000229395 | ENSP00000323288 |
| ENSP00000229395 | ENSP00000324020 |
| ENSP00000229395 | ENSP00000336587 |
| ENSP00000229395 | ENSP00000350071 |
| ENSP00000229395 | ENSP00000350094 |
| ENSP00000229395 | ENSP00000352676 |
| ENSP00000229395 | ENSP00000358810 |
| ENSP00000229395 | ENSP00000362424 |
| ENSP00000229395 | ENSP00000362578 |
| ENSP00000229395 | ENSP00000373331 |
| ENSP00000229416 | ENSP00000234396 |
| ENSP00000229416 | ENSP00000241052 |
| ENSP00000229416 | ENSP00000251038 |



|                 |                 |
|-----------------|-----------------|
| ENSP00000229416 | ENSP00000261601 |
| ENSP00000229416 | ENSP00000265316 |
| ENSP00000229416 | ENSP00000272227 |
| ENSP00000229416 | ENSP00000272286 |
| ENSP00000229416 | ENSP00000287936 |
| ENSP00000229416 | ENSP00000290597 |
| ENSP00000229416 | ENSP00000296786 |
| ENSP00000229416 | ENSP00000300648 |
| ENSP00000229416 | ENSP00000323313 |
| ENSP00000229416 | ENSP00000330836 |
| ENSP00000229416 | ENSP00000351284 |
| ENSP00000229416 | ENSP00000354995 |
| ENSP00000229416 | ENSP00000358140 |
| ENSP00000229416 | ENSP00000359258 |
| ENSP00000229416 | ENSP00000360183 |
| ENSP00000229416 | ENSP00000360268 |
| ENSP00000229416 | ENSP00000379217 |
| ENSP00000229416 | ENSP00000417963 |
| ENSP00000229595 | ENSP00000230859 |
| ENSP00000229595 | ENSP00000233146 |
| ENSP00000229595 | ENSP00000234296 |
| ENSP00000229595 | ENSP00000234420 |
| ENSP00000229595 | ENSP00000238789 |
| ENSP00000229595 | ENSP00000247219 |
| ENSP00000229595 | ENSP00000247815 |
| ENSP00000229595 | ENSP00000247843 |
| ENSP00000229595 | ENSP00000248633 |
| ENSP00000229595 | ENSP00000249636 |
| ENSP00000229595 | ENSP00000252622 |
| ENSP00000229595 | ENSP00000254037 |
| ENSP00000229595 | ENSP00000254719 |
| ENSP00000229595 | ENSP00000254900 |
| ENSP00000229595 | ENSP00000257177 |
| ENSP00000229595 | ENSP00000257789 |
| ENSP00000229595 | ENSP00000259008 |
| ENSP00000229595 | ENSP00000259050 |
| ENSP00000229595 | ENSP00000260810 |
| ENSP00000229595 | ENSP00000261211 |
| ENSP00000229595 | ENSP00000261424 |
| ENSP00000229595 | ENSP00000261601 |
| ENSP00000229595 | ENSP00000261819 |
| ENSP00000229595 | ENSP00000262300 |
| ENSP00000229595 | ENSP00000262315 |
| ENSP00000229595 | ENSP00000262608 |
| ENSP00000229595 | ENSP00000263043 |
| ENSP00000229595 | ENSP00000263121 |

|                 |                 |
|-----------------|-----------------|
| ENSP00000229595 | ENSP00000263201 |
| ENSP00000229595 | ENSP00000263208 |
| ENSP00000229595 | ENSP00000263377 |
| ENSP00000229595 | ENSP00000263390 |
| ENSP00000229595 | ENSP00000263805 |
| ENSP00000229595 | ENSP00000263956 |
| ENSP00000229595 | ENSP00000264169 |
| ENSP00000229595 | ENSP00000264183 |
| ENSP00000229595 | ENSP00000264926 |
| ENSP00000229595 | ENSP00000265056 |
| ENSP00000229595 | ENSP00000265073 |
| ENSP00000229595 | ENSP00000265081 |
| ENSP00000229595 | ENSP00000265140 |
| ENSP00000229595 | ENSP00000265970 |
| ENSP00000229595 | ENSP00000265990 |
| ENSP00000229595 | ENSP00000267064 |
| ENSP00000229595 | ENSP00000267430 |
| ENSP00000229595 | ENSP00000268043 |
| ENSP00000229595 | ENSP00000270176 |
| ENSP00000229595 | ENSP00000274140 |
| ENSP00000229595 | ENSP00000275780 |
| ENSP00000229595 | ENSP00000276072 |
| ENSP00000229595 | ENSP00000278412 |
| ENSP00000229595 | ENSP00000278616 |
| ENSP00000229595 | ENSP00000283882 |
| ENSP00000229595 | ENSP00000283928 |
| ENSP00000229595 | ENSP00000287239 |
| ENSP00000229595 | ENSP00000287598 |
| ENSP00000229595 | ENSP00000290649 |
| ENSP00000229595 | ENSP00000296273 |
| ENSP00000229595 | ENSP00000296783 |
| ENSP00000229595 | ENSP00000298139 |
| ENSP00000229595 | ENSP00000301280 |
| ENSP00000229595 | ENSP00000302478 |
| ENSP00000229595 | ENSP00000302530 |
| ENSP00000229595 | ENSP00000302955 |
| ENSP00000229595 | ENSP00000304593 |
| ENSP00000229595 | ENSP00000306983 |
| ENSP00000229595 | ENSP00000307143 |
| ENSP00000229595 | ENSP00000307208 |
| ENSP00000229595 | ENSP00000308944 |
| ENSP00000229595 | ENSP00000309141 |
| ENSP00000229595 | ENSP00000312244 |
| ENSP00000229595 | ENSP00000312981 |
| ENSP00000229595 | ENSP00000313171 |
| ENSP00000229595 | ENSP00000313243 |

|                 |                 |
|-----------------|-----------------|
| ENSP00000229595 | ENSP00000313420 |
| ENSP00000229595 | ENSP00000315700 |
| ENSP00000229595 | ENSP00000315791 |
| ENSP00000229595 | ENSP00000317087 |
| ENSP00000229595 | ENSP00000317636 |
| ENSP00000229595 | ENSP00000318977 |
| ENSP00000229595 | ENSP00000320485 |
| ENSP00000229595 | ENSP00000320885 |
| ENSP00000229595 | ENSP00000322570 |
| ENSP00000229595 | ENSP00000322957 |
| ENSP00000229595 | ENSP00000325677 |
| ENSP00000229595 | ENSP00000329466 |
| ENSP00000229595 | ENSP00000329933 |
| ENSP00000229595 | ENSP00000331310 |
| ENSP00000229595 | ENSP00000333667 |
| ENSP00000229595 | ENSP00000333836 |
| ENSP00000229595 | ENSP00000334061 |
| ENSP00000229595 | ENSP00000334675 |
| ENSP00000229595 | ENSP00000336606 |
| ENSP00000229595 | ENSP00000336842 |
| ENSP00000229595 | ENSP00000343392 |
| ENSP00000229595 | ENSP00000343741 |
| ENSP00000229595 | ENSP00000343745 |
| ENSP00000229595 | ENSP00000344741 |
| ENSP00000229595 | ENSP00000346453 |
| ENSP00000229595 | ENSP00000347232 |
| ENSP00000229595 | ENSP00000347602 |
| ENSP00000229595 | ENSP00000348010 |
| ENSP00000229595 | ENSP00000348089 |
| ENSP00000229595 | ENSP00000348564 |
| ENSP00000229595 | ENSP00000349205 |
| ENSP00000229595 | ENSP00000349213 |
| ENSP00000229595 | ENSP00000351284 |
| ENSP00000229595 | ENSP00000351697 |
| ENSP00000229595 | ENSP00000351947 |
| ENSP00000229595 | ENSP00000353332 |
| ENSP00000229595 | ENSP00000353622 |
| ENSP00000229595 | ENSP00000353793 |
| ENSP00000229595 | ENSP00000353904 |
| ENSP00000229595 | ENSP00000354522 |
| ENSP00000229595 | ENSP00000354916 |
| ENSP00000229595 | ENSP00000355051 |
| ENSP00000229595 | ENSP00000355866 |
| ENSP00000229595 | ENSP00000356530 |
| ENSP00000229595 | ENSP00000356744 |
| ENSP00000229595 | ENSP00000357597 |

|                 |                 |
|-----------------|-----------------|
| ENSP00000229595 | ENSP00000357887 |
| ENSP00000229595 | ENSP00000358478 |
| ENSP00000229595 | ENSP00000358854 |
| ENSP00000229595 | ENSP00000359531 |
| ENSP00000229595 | ENSP00000360116 |
| ENSP00000229595 | ENSP00000360621 |
| ENSP00000229595 | ENSP00000361998 |
| ENSP00000229595 | ENSP00000362352 |
| ENSP00000229595 | ENSP00000362441 |
| ENSP00000229595 | ENSP00000362592 |
| ENSP00000229595 | ENSP00000364591 |
| ENSP00000229595 | ENSP00000365025 |
| ENSP00000229595 | ENSP00000366395 |
| ENSP00000229595 | ENSP00000366565 |
| ENSP00000229595 | ENSP00000366974 |
| ENSP00000229595 | ENSP00000367406 |
| ENSP00000229595 | ENSP00000368349 |
| ENSP00000229595 | ENSP00000368438 |
| ENSP00000229595 | ENSP00000369411 |
| ENSP00000229595 | ENSP00000369695 |
| ENSP00000229595 | ENSP00000369716 |
| ENSP00000229595 | ENSP00000370151 |
| ENSP00000229595 | ENSP00000371475 |
| ENSP00000229595 | ENSP00000372023 |
| ENSP00000229595 | ENSP00000374213 |
| ENSP00000229595 | ENSP00000375809 |
| ENSP00000229595 | ENSP00000375986 |
| ENSP00000229595 | ENSP00000377262 |
| ENSP00000229595 | ENSP00000377747 |
| ENSP00000229595 | ENSP00000379372 |
| ENSP00000229595 | ENSP00000380129 |
| ENSP00000229595 | ENSP00000380504 |
| ENSP00000229595 | ENSP00000381657 |
| ENSP00000229595 | ENSP00000382688 |
| ENSP00000229595 | ENSP00000386239 |
| ENSP00000229595 | ENSP00000386759 |
| ENSP00000229595 | ENSP00000392028 |
| ENSP00000229595 | ENSP00000392985 |
| ENSP00000229595 | ENSP00000394791 |
| ENSP00000229595 | ENSP00000398824 |
| ENSP00000229595 | ENSP00000401445 |
| ENSP00000229595 | ENSP00000402084 |
| ENSP00000229595 | ENSP00000402515 |
| ENSP00000229595 | ENSP00000418734 |
| ENSP00000229758 | ENSP00000231487 |
| ENSP00000229758 | ENSP00000256442 |

|                 |                 |
|-----------------|-----------------|
| ENSP00000229758 | ENSP00000348554 |
| ENSP00000229758 | ENSP00000359206 |
| ENSP00000229758 | ENSP00000359356 |
| ENSP00000229758 | ENSP00000363322 |
| ENSP00000229758 | ENSP00000378529 |
| ENSP00000229769 | ENSP00000232424 |
| ENSP00000229769 | ENSP00000261755 |
| ENSP00000229769 | ENSP00000267430 |
| ENSP00000229769 | ENSP00000287647 |
| ENSP00000229769 | ENSP00000289081 |
| ENSP00000229769 | ENSP00000330875 |
| ENSP00000229769 | ENSP00000367808 |
| ENSP00000229769 | ENSP00000367910 |
| ENSP00000229769 | ENSP00000368438 |
| ENSP00000229769 | ENSP00000369497 |
| ENSP00000229769 | ENSP00000373952 |
| ENSP00000229771 | ENSP00000402935 |
| ENSP00000229922 | ENSP00000253083 |
| ENSP00000229922 | ENSP00000261170 |
| ENSP00000229922 | ENSP00000261249 |
| ENSP00000229922 | ENSP00000262428 |
| ENSP00000229922 | ENSP00000263265 |
| ENSP00000229922 | ENSP00000264335 |
| ENSP00000229922 | ENSP00000264995 |
| ENSP00000229922 | ENSP00000266058 |
| ENSP00000229922 | ENSP00000268661 |
| ENSP00000229922 | ENSP00000272203 |
| ENSP00000229922 | ENSP00000275605 |
| ENSP00000229922 | ENSP00000276416 |
| ENSP00000229922 | ENSP00000292385 |
| ENSP00000229922 | ENSP00000294016 |
| ENSP00000229922 | ENSP00000295685 |
| ENSP00000229922 | ENSP00000298288 |
| ENSP00000229922 | ENSP00000301843 |
| ENSP00000229922 | ENSP00000315859 |
| ENSP00000229922 | ENSP00000322170 |
| ENSP00000229922 | ENSP00000326238 |
| ENSP00000229922 | ENSP00000326806 |
| ENSP00000229922 | ENSP00000329858 |
| ENSP00000229922 | ENSP00000333950 |
| ENSP00000229922 | ENSP00000337463 |
| ENSP00000229922 | ENSP00000339845 |
| ENSP00000229922 | ENSP00000344874 |
| ENSP00000229922 | ENSP00000348163 |
| ENSP00000229922 | ENSP00000348602 |
| ENSP00000229922 | ENSP00000356825 |

|                 |                 |
|-----------------|-----------------|
| ENSP00000229922 | ENSP00000359380 |
| ENSP00000229922 | ENSP00000364289 |
| ENSP00000229922 | ENSP00000368305 |
| ENSP00000229922 | ENSP00000368824 |
| ENSP00000229922 | ENSP00000376410 |
| ENSP00000229922 | ENSP00000380431 |
| ENSP00000229922 | ENSP00000382723 |
| ENSP00000229922 | ENSP00000389516 |
| ENSP00000229922 | ENSP00000389934 |
| ENSP00000229922 | ENSP00000395863 |
| ENSP00000229922 | ENSP00000401287 |
| ENSP00000229922 | ENSP00000405864 |
| ENSP00000229922 | ENSP00000412805 |
| ENSP00000229922 | ENSP00000413625 |
| ENSP00000229922 | ENSP00000419361 |
| ENSP00000229971 | ENSP00000231487 |
| ENSP00000229971 | ENSP00000232501 |
| ENSP00000229971 | ENSP00000284811 |
| ENSP00000229971 | ENSP00000285021 |
| ENSP00000229971 | ENSP00000288985 |
| ENSP00000229971 | ENSP00000334675 |
| ENSP00000229971 | ENSP00000348089 |
| ENSP00000229971 | ENSP00000350708 |
| ENSP00000229971 | ENSP00000360621 |
| ENSP00000229971 | ENSP00000364270 |
| ENSP00000230036 | ENSP00000251038 |
| ENSP00000230036 | ENSP00000316333 |
| ENSP00000230036 | ENSP00000349687 |
| ENSP00000230036 | ENSP00000350425 |
| ENSP00000230036 | ENSP00000362334 |
| ENSP00000230036 | ENSP00000375881 |
| ENSP00000230048 | ENSP00000293406 |
| ENSP00000230048 | ENSP00000317872 |
| ENSP00000230048 | ENSP00000386227 |
| ENSP00000230050 | ENSP00000232905 |
| ENSP00000230050 | ENSP00000234170 |
| ENSP00000230050 | ENSP00000236051 |
| ENSP00000230050 | ENSP00000241600 |
| ENSP00000230050 | ENSP00000245539 |
| ENSP00000230050 | ENSP00000251038 |
| ENSP00000230050 | ENSP00000252543 |
| ENSP00000230050 | ENSP00000253099 |
| ENSP00000230050 | ENSP00000253788 |
| ENSP00000230050 | ENSP00000254037 |
| ENSP00000230050 | ENSP00000254940 |
| ENSP00000230050 | ENSP00000257829 |

|                 |                 |
|-----------------|-----------------|
| ENSP00000230050 | ENSP00000258455 |
| ENSP00000230050 | ENSP00000258654 |
| ENSP00000230050 | ENSP00000259469 |
| ENSP00000230050 | ENSP00000260102 |
| ENSP00000230050 | ENSP00000260443 |
| ENSP00000230050 | ENSP00000262584 |
| ENSP00000230050 | ENSP00000263629 |
| ENSP00000230050 | ENSP00000263657 |
| ENSP00000230050 | ENSP00000264995 |
| ENSP00000230050 | ENSP00000265100 |
| ENSP00000230050 | ENSP00000268661 |
| ENSP00000230050 | ENSP00000270625 |
| ENSP00000230050 | ENSP00000272418 |
| ENSP00000230050 | ENSP00000274242 |
| ENSP00000230050 | ENSP00000278572 |
| ENSP00000230050 | ENSP00000283109 |
| ENSP00000230050 | ENSP00000287038 |
| ENSP00000230050 | ENSP00000289371 |
| ENSP00000230050 | ENSP00000294189 |
| ENSP00000230050 | ENSP00000296411 |
| ENSP00000230050 | ENSP00000296577 |
| ENSP00000230050 | ENSP00000296674 |
| ENSP00000230050 | ENSP00000296802 |
| ENSP00000230050 | ENSP00000298283 |
| ENSP00000230050 | ENSP00000298746 |
| ENSP00000230050 | ENSP00000300151 |
| ENSP00000230050 | ENSP00000302886 |
| ENSP00000230050 | ENSP00000302896 |
| ENSP00000230050 | ENSP00000303434 |
| ENSP00000230050 | ENSP00000306548 |
| ENSP00000230050 | ENSP00000307525 |
| ENSP00000230050 | ENSP00000307889 |
| ENSP00000230050 | ENSP00000308897 |
| ENSP00000230050 | ENSP00000309334 |
| ENSP00000230050 | ENSP00000309830 |
| ENSP00000230050 | ENSP00000310448 |
| ENSP00000230050 | ENSP00000311028 |
| ENSP00000230050 | ENSP00000311430 |
| ENSP00000230050 | ENSP00000312735 |
| ENSP00000230050 | ENSP00000317376 |
| ENSP00000230050 | ENSP00000317992 |
| ENSP00000230050 | ENSP00000318646 |
| ENSP00000230050 | ENSP00000320917 |
| ENSP00000230050 | ENSP00000322396 |
| ENSP00000230050 | ENSP00000322419 |
| ENSP00000230050 | ENSP00000323856 |

|                 |                 |
|-----------------|-----------------|
| ENSP00000230050 | ENSP00000325312 |
| ENSP00000230050 | ENSP00000326981 |
| ENSP00000230050 | ENSP00000328854 |
| ENSP00000230050 | ENSP00000329466 |
| ENSP00000230050 | ENSP00000331019 |
| ENSP00000230050 | ENSP00000332198 |
| ENSP00000230050 | ENSP00000336702 |
| ENSP00000230050 | ENSP00000338862 |
| ENSP00000230050 | ENSP00000339095 |
| ENSP00000230050 | ENSP00000339795 |
| ENSP00000230050 | ENSP00000341885 |
| ENSP00000230050 | ENSP00000345096 |
| ENSP00000230050 | ENSP00000345156 |
| ENSP00000230050 | ENSP00000346015 |
| ENSP00000230050 | ENSP00000346022 |
| ENSP00000230050 | ENSP00000346027 |
| ENSP00000230050 | ENSP00000346037 |
| ENSP00000230050 | ENSP00000346050 |
| ENSP00000230050 | ENSP00000346067 |
| ENSP00000230050 | ENSP00000346088 |
| ENSP00000230050 | ENSP00000346725 |
| ENSP00000230050 | ENSP00000354040 |
| ENSP00000230050 | ENSP00000354525 |
| ENSP00000230050 | ENSP00000354739 |
| ENSP00000230050 | ENSP00000354812 |
| ENSP00000230050 | ENSP00000355541 |
| ENSP00000230050 | ENSP00000358563 |
| ENSP00000230050 | ENSP00000359345 |
| ENSP00000230050 | ENSP00000359688 |
| ENSP00000230050 | ENSP00000359939 |
| ENSP00000230050 | ENSP00000360031 |
| ENSP00000230050 | ENSP00000360412 |
| ENSP00000230050 | ENSP00000361982 |
| ENSP00000230050 | ENSP00000362306 |
| ENSP00000230050 | ENSP00000362744 |
| ENSP00000230050 | ENSP00000363018 |
| ENSP00000230050 | ENSP00000363308 |
| ENSP00000230050 | ENSP00000363384 |
| ENSP00000230050 | ENSP00000363559 |
| ENSP00000230050 | ENSP00000363676 |
| ENSP00000230050 | ENSP00000364320 |
| ENSP00000230050 | ENSP00000369757 |
| ENSP00000230050 | ENSP00000373404 |
| ENSP00000230050 | ENSP00000375730 |
| ENSP00000230050 | ENSP00000377640 |
| ENSP00000230050 | ENSP00000377865 |



|                 |                 |
|-----------------|-----------------|
| ENSP00000230050 | ENSP00000378160 |
| ENSP00000230050 | ENSP00000379339 |
| ENSP00000230050 | ENSP00000379607 |
| ENSP00000230050 | ENSP00000379888 |
| ENSP00000230050 | ENSP00000380156 |
| ENSP00000230050 | ENSP00000380982 |
| ENSP00000230050 | ENSP00000386717 |
| ENSP00000230050 | ENSP00000389103 |
| ENSP00000230050 | ENSP00000392859 |
| ENSP00000230050 | ENSP00000393241 |
| ENSP00000230050 | ENSP00000393393 |
| ENSP00000230050 | ENSP00000402338 |
| ENSP00000230050 | ENSP00000403175 |
| ENSP00000230050 | ENSP00000412583 |
| ENSP00000230050 | ENSP00000414321 |
| ENSP00000230050 | ENSP00000416110 |
| ENSP00000230056 | ENSP00000244741 |
| ENSP00000230056 | ENSP00000249499 |
| ENSP00000230056 | ENSP00000249504 |
| ENSP00000230056 | ENSP00000267807 |
| ENSP00000230056 | ENSP00000271715 |
| ENSP00000230056 | ENSP00000283921 |
| ENSP00000230056 | ENSP00000295951 |
| ENSP00000230056 | ENSP00000298317 |
| ENSP00000230056 | ENSP00000301019 |
| ENSP00000230056 | ENSP00000315949 |
| ENSP00000230056 | ENSP00000316109 |
| ENSP00000230056 | ENSP00000322915 |
| ENSP00000230056 | ENSP00000323288 |
| ENSP00000230056 | ENSP00000336587 |
| ENSP00000230056 | ENSP00000345096 |
| ENSP00000230056 | ENSP00000350094 |
| ENSP00000230056 | ENSP00000351407 |
| ENSP00000230056 | ENSP00000355153 |
| ENSP00000230056 | ENSP00000359531 |
| ENSP00000230056 | ENSP00000372170 |
| ENSP00000230056 | ENSP00000373331 |
| ENSP00000230056 | ENSP00000414920 |
| ENSP00000230124 | ENSP00000251038 |
| ENSP00000230124 | ENSP00000259253 |
| ENSP00000230124 | ENSP00000261776 |
| ENSP00000230124 | ENSP00000261842 |
| ENSP00000230124 | ENSP00000264380 |
| ENSP00000230124 | ENSP00000269122 |
| ENSP00000230124 | ENSP00000288828 |
| ENSP00000230124 | ENSP00000290974 |

|                 |                 |
|-----------------|-----------------|
| ENSP00000230124 | ENSP00000331201 |
| ENSP00000230124 | ENSP00000351926 |
| ENSP00000230124 | ENSP00000353098 |
| ENSP00000230124 | ENSP00000354519 |
| ENSP00000230124 | ENSP00000362115 |
| ENSP00000230124 | ENSP00000373399 |
| ENSP00000230124 | ENSP00000376268 |
| ENSP00000230124 | ENSP00000377148 |
| ENSP00000230124 | ENSP00000384651 |
| ENSP00000230340 | ENSP00000232888 |
| ENSP00000230340 | ENSP00000240316 |
| ENSP00000230340 | ENSP00000244230 |
| ENSP00000230340 | ENSP00000253099 |
| ENSP00000230340 | ENSP00000254037 |
| ENSP00000230340 | ENSP00000254605 |
| ENSP00000230340 | ENSP00000257829 |
| ENSP00000230340 | ENSP00000257909 |
| ENSP00000230340 | ENSP00000259750 |
| ENSP00000230340 | ENSP00000261637 |
| ENSP00000230340 | ENSP00000261708 |
| ENSP00000230340 | ENSP00000261741 |
| ENSP00000230340 | ENSP00000262294 |
| ENSP00000230340 | ENSP00000263657 |
| ENSP00000230340 | ENSP00000265758 |
| ENSP00000230340 | ENSP00000267425 |
| ENSP00000230340 | ENSP00000268482 |
| ENSP00000230340 | ENSP00000268802 |
| ENSP00000230340 | ENSP00000270625 |
| ENSP00000230340 | ENSP00000272521 |
| ENSP00000230340 | ENSP00000278412 |
| ENSP00000230340 | ENSP00000278572 |
| ENSP00000230340 | ENSP00000282412 |
| ENSP00000230340 | ENSP00000283109 |
| ENSP00000230340 | ENSP00000283875 |
| ENSP00000230340 | ENSP00000285873 |
| ENSP00000230340 | ENSP00000291576 |
| ENSP00000230340 | ENSP00000293883 |
| ENSP00000230340 | ENSP00000295373 |
| ENSP00000230340 | ENSP00000296733 |
| ENSP00000230340 | ENSP00000296792 |
| ENSP00000230340 | ENSP00000296802 |
| ENSP00000230340 | ENSP00000297579 |
| ENSP00000230340 | ENSP00000297873 |
| ENSP00000230340 | ENSP00000297990 |
| ENSP00000230340 | ENSP00000298746 |
| ENSP00000230340 | ENSP00000300151 |

|                 |                 |
|-----------------|-----------------|
| ENSP00000230340 | ENSP00000301364 |
| ENSP00000230340 | ENSP00000302896 |
| ENSP00000230340 | ENSP00000308179 |
| ENSP00000230340 | ENSP00000311028 |
| ENSP00000230340 | ENSP00000311135 |
| ENSP00000230340 | ENSP00000311430 |
| ENSP00000230340 | ENSP00000314193 |
| ENSP00000230340 | ENSP00000315674 |
| ENSP00000230340 | ENSP00000315859 |
| ENSP00000230340 | ENSP00000318646 |
| ENSP00000230340 | ENSP00000320768 |
| ENSP00000230340 | ENSP00000320917 |
| ENSP00000230340 | ENSP00000324122 |
| ENSP00000230340 | ENSP00000326981 |
| ENSP00000230340 | ENSP00000327179 |
| ENSP00000230340 | ENSP00000328854 |
| ENSP00000230340 | ENSP00000329466 |
| ENSP00000230340 | ENSP00000331879 |
| ENSP00000230340 | ENSP00000331907 |
| ENSP00000230340 | ENSP00000336712 |
| ENSP00000230340 | ENSP00000339095 |
| ENSP00000230340 | ENSP00000342381 |
| ENSP00000230340 | ENSP00000347087 |
| ENSP00000230340 | ENSP00000354125 |
| ENSP00000230340 | ENSP00000355471 |
| ENSP00000230340 | ENSP00000355541 |
| ENSP00000230340 | ENSP00000356134 |
| ENSP00000230340 | ENSP00000356520 |
| ENSP00000230340 | ENSP00000356548 |
| ENSP00000230340 | ENSP00000358563 |
| ENSP00000230340 | ENSP00000358812 |
| ENSP00000230340 | ENSP00000359688 |
| ENSP00000230340 | ENSP00000360031 |
| ENSP00000230340 | ENSP00000361287 |
| ENSP00000230340 | ENSP00000361686 |
| ENSP00000230340 | ENSP00000361982 |
| ENSP00000230340 | ENSP00000362105 |
| ENSP00000230340 | ENSP00000362744 |
| ENSP00000230340 | ENSP00000363308 |
| ENSP00000230340 | ENSP00000363642 |
| ENSP00000230340 | ENSP00000363676 |
| ENSP00000230340 | ENSP00000363746 |
| ENSP00000230340 | ENSP00000366557 |
| ENSP00000230340 | ENSP00000369162 |
| ENSP00000230340 | ENSP00000369757 |
| ENSP00000230340 | ENSP00000370589 |

|                 |                 |
|-----------------|-----------------|
| ENSP00000230340 | ENSP00000371101 |
| ENSP00000230340 | ENSP00000371169 |
| ENSP00000230340 | ENSP00000372695 |
| ENSP00000230340 | ENSP00000374219 |
| ENSP00000230340 | ENSP00000375986 |
| ENSP00000230340 | ENSP00000377040 |
| ENSP00000230340 | ENSP00000378529 |
| ENSP00000230340 | ENSP00000379888 |
| ENSP00000230340 | ENSP00000384302 |
| ENSP00000230340 | ENSP00000387303 |
| ENSP00000230340 | ENSP00000392601 |
| ENSP00000230340 | ENSP00000399454 |
| ENSP00000230340 | ENSP00000402338 |
| ENSP00000230340 | ENSP00000402869 |
| ENSP00000230340 | ENSP00000405614 |
| ENSP00000230340 | ENSP00000417229 |
| ENSP00000230419 | ENSP00000296084 |
| ENSP00000230419 | ENSP00000324857 |
| ENSP00000230419 | ENSP00000344456 |
| ENSP00000230431 | ENSP00000276603 |
| ENSP00000230431 | ENSP00000350249 |
| ENSP00000230449 | ENSP00000243253 |
| ENSP00000230449 | ENSP00000248139 |
| ENSP00000230449 | ENSP00000249647 |
| ENSP00000230449 | ENSP00000251038 |
| ENSP00000230449 | ENSP00000253861 |
| ENSP00000230449 | ENSP00000261531 |
| ENSP00000230449 | ENSP00000267484 |
| ENSP00000230449 | ENSP00000272427 |
| ENSP00000230449 | ENSP00000272972 |
| ENSP00000230449 | ENSP00000273666 |
| ENSP00000230449 | ENSP00000311505 |
| ENSP00000230449 | ENSP00000317714 |
| ENSP00000230449 | ENSP00000323377 |
| ENSP00000230449 | ENSP00000326514 |
| ENSP00000230449 | ENSP00000328182 |
| ENSP00000230449 | ENSP00000334100 |
| ENSP00000230449 | ENSP00000341538 |
| ENSP00000230449 | ENSP00000348215 |
| ENSP00000230449 | ENSP00000348602 |
| ENSP00000230449 | ENSP00000353564 |
| ENSP00000230449 | ENSP00000355721 |
| ENSP00000230449 | ENSP00000359222 |
| ENSP00000230449 | ENSP00000360532 |
| ENSP00000230449 | ENSP00000361669 |
| ENSP00000230449 | ENSP00000362399 |

|                 |                 |
|-----------------|-----------------|
| ENSP00000230449 | ENSP00000365630 |
| ENSP00000230449 | ENSP00000369863 |
| ENSP00000230449 | ENSP00000373399 |
| ENSP00000230449 | ENSP00000380450 |
| ENSP00000230449 | ENSP00000381293 |
| ENSP00000230449 | ENSP00000382177 |
| ENSP00000230449 | ENSP00000382492 |
| ENSP00000230449 | ENSP00000389934 |
| ENSP00000230449 | ENSP00000411409 |
| ENSP00000230510 | ENSP00000233623 |
| ENSP00000230510 | ENSP00000251038 |
| ENSP00000230510 | ENSP00000252999 |
| ENSP00000230510 | ENSP00000256442 |
| ENSP00000230510 | ENSP00000260731 |
| ENSP00000230510 | ENSP00000261211 |
| ENSP00000230510 | ENSP00000261531 |
| ENSP00000230510 | ENSP00000261597 |
| ENSP00000230510 | ENSP00000270861 |
| ENSP00000230510 | ENSP00000271452 |
| ENSP00000230510 | ENSP00000274289 |
| ENSP00000230510 | ENSP00000276014 |
| ENSP00000230510 | ENSP00000287598 |
| ENSP00000230510 | ENSP00000296509 |
| ENSP00000230510 | ENSP00000300249 |
| ENSP00000230510 | ENSP00000300584 |
| ENSP00000230510 | ENSP00000302530 |
| ENSP00000230510 | ENSP00000305941 |
| ENSP00000230510 | ENSP00000305958 |
| ENSP00000230510 | ENSP00000311083 |
| ENSP00000230510 | ENSP00000316121 |
| ENSP00000230510 | ENSP00000322180 |
| ENSP00000230510 | ENSP00000331831 |
| ENSP00000230510 | ENSP00000334280 |
| ENSP00000230510 | ENSP00000335463 |
| ENSP00000230510 | ENSP00000346791 |
| ENSP00000230510 | ENSP00000348554 |
| ENSP00000230510 | ENSP00000356448 |
| ENSP00000230510 | ENSP00000367208 |
| ENSP00000230510 | ENSP00000378350 |
| ENSP00000230510 | ENSP00000381003 |
| ENSP00000230510 | ENSP00000382562 |
| ENSP00000230510 | ENSP00000383145 |
| ENSP00000230568 | ENSP00000266058 |
| ENSP00000230568 | ENSP00000370034 |
| ENSP00000230588 | ENSP00000242152 |
| ENSP00000230588 | ENSP00000252999 |

|                 |                 |
|-----------------|-----------------|
| ENSP00000230588 | ENSP00000256010 |
| ENSP00000230588 | ENSP00000256857 |
| ENSP00000230588 | ENSP00000264708 |
| ENSP00000230588 | ENSP00000265023 |
| ENSP00000230588 | ENSP00000276414 |
| ENSP00000230588 | ENSP00000282091 |
| ENSP00000230588 | ENSP00000301740 |
| ENSP00000230588 | ENSP00000321106 |
| ENSP00000230588 | ENSP00000335657 |
| ENSP00000230588 | ENSP00000346839 |
| ENSP00000230588 | ENSP00000355627 |
| ENSP00000230588 | ENSP00000356213 |
| ENSP00000230588 | ENSP00000387662 |
| ENSP00000230792 | ENSP00000293406 |
| ENSP00000230792 | ENSP00000402338 |
| ENSP00000230859 | ENSP00000236051 |
| ENSP00000230859 | ENSP00000244769 |
| ENSP00000230859 | ENSP00000246802 |
| ENSP00000230859 | ENSP00000247843 |
| ENSP00000230859 | ENSP00000251038 |
| ENSP00000230859 | ENSP00000251607 |
| ENSP00000230859 | ENSP00000252115 |
| ENSP00000230859 | ENSP00000254037 |
| ENSP00000230859 | ENSP00000256383 |
| ENSP00000230859 | ENSP00000259469 |
| ENSP00000230859 | ENSP00000260129 |
| ENSP00000230859 | ENSP00000260403 |
| ENSP00000230859 | ENSP00000260810 |
| ENSP00000230859 | ENSP00000260956 |
| ENSP00000230859 | ENSP00000261015 |
| ENSP00000230859 | ENSP00000262056 |
| ENSP00000230859 | ENSP00000262077 |
| ENSP00000230859 | ENSP00000262584 |
| ENSP00000230859 | ENSP00000263201 |
| ENSP00000230859 | ENSP00000263208 |
| ENSP00000230859 | ENSP00000264515 |
| ENSP00000230859 | ENSP00000264670 |
| ENSP00000230859 | ENSP00000264951 |
| ENSP00000230859 | ENSP00000268482 |
| ENSP00000230859 | ENSP00000268802 |
| ENSP00000230859 | ENSP00000272418 |
| ENSP00000230859 | ENSP00000273064 |
| ENSP00000230859 | ENSP00000274242 |
| ENSP00000230859 | ENSP00000278572 |
| ENSP00000230859 | ENSP00000282999 |
| ENSP00000230859 | ENSP00000286835 |

|                 |                 |
|-----------------|-----------------|
| ENSP00000230859 | ENSP00000287038 |
| ENSP00000230859 | ENSP00000287239 |
| ENSP00000230859 | ENSP00000295951 |
| ENSP00000230859 | ENSP00000296792 |
| ENSP00000230859 | ENSP00000296802 |
| ENSP00000230859 | ENSP00000301764 |
| ENSP00000230859 | ENSP00000302896 |
| ENSP00000230859 | ENSP00000306561 |
| ENSP00000230859 | ENSP00000306983 |
| ENSP00000230859 | ENSP00000307889 |
| ENSP00000230859 | ENSP00000311028 |
| ENSP00000230859 | ENSP00000311430 |
| ENSP00000230859 | ENSP00000311873 |
| ENSP00000230859 | ENSP00000311977 |
| ENSP00000230859 | ENSP00000313350 |
| ENSP00000230859 | ENSP00000314311 |
| ENSP00000230859 | ENSP00000314441 |
| ENSP00000230859 | ENSP00000314792 |
| ENSP00000230859 | ENSP00000315859 |
| ENSP00000230859 | ENSP00000316879 |
| ENSP00000230859 | ENSP00000318195 |
| ENSP00000230859 | ENSP00000318977 |
| ENSP00000230859 | ENSP00000322396 |
| ENSP00000230859 | ENSP00000322457 |
| ENSP00000230859 | ENSP00000322570 |
| ENSP00000230859 | ENSP00000325518 |
| ENSP00000230859 | ENSP00000331817 |
| ENSP00000230859 | ENSP00000337839 |
| ENSP00000230859 | ENSP00000338862 |
| ENSP00000230859 | ENSP00000339845 |
| ENSP00000230859 | ENSP00000342374 |
| ENSP00000230859 | ENSP00000343745 |
| ENSP00000230859 | ENSP00000346015 |
| ENSP00000230859 | ENSP00000346120 |
| ENSP00000230859 | ENSP00000347087 |
| ENSP00000230859 | ENSP00000351284 |
| ENSP00000230859 | ENSP00000351575 |
| ENSP00000230859 | ENSP00000351697 |
| ENSP00000230859 | ENSP00000354040 |
| ENSP00000230859 | ENSP00000354522 |
| ENSP00000230859 | ENSP00000355185 |
| ENSP00000230859 | ENSP00000355899 |
| ENSP00000230859 | ENSP00000356146 |
| ENSP00000230859 | ENSP00000358140 |
| ENSP00000230859 | ENSP00000358576 |
| ENSP00000230859 | ENSP00000358812 |

|                 |                 |
|-----------------|-----------------|
| ENSP00000230859 | ENSP00000360817 |
| ENSP00000230859 | ENSP00000361076 |
| ENSP00000230859 | ENSP00000362153 |
| ENSP00000230859 | ENSP00000362306 |
| ENSP00000230859 | ENSP00000362688 |
| ENSP00000230859 | ENSP00000362900 |
| ENSP00000230859 | ENSP00000363559 |
| ENSP00000230859 | ENSP00000363676 |
| ENSP00000230859 | ENSP00000363944 |
| ENSP00000230859 | ENSP00000364119 |
| ENSP00000230859 | ENSP00000364543 |
| ENSP00000230859 | ENSP00000366135 |
| ENSP00000230859 | ENSP00000366519 |
| ENSP00000230859 | ENSP00000366974 |
| ENSP00000230859 | ENSP00000367527 |
| ENSP00000230859 | ENSP00000368349 |
| ENSP00000230859 | ENSP00000369757 |
| ENSP00000230859 | ENSP00000370741 |
| ENSP00000230859 | ENSP00000372023 |
| ENSP00000230859 | ENSP00000372827 |
| ENSP00000230859 | ENSP00000373404 |
| ENSP00000230859 | ENSP00000374213 |
| ENSP00000230859 | ENSP00000377640 |
| ENSP00000230859 | ENSP00000377865 |
| ENSP00000230859 | ENSP00000380982 |
| ENSP00000230859 | ENSP00000381045 |
| ENSP00000230859 | ENSP00000382392 |
| ENSP00000230859 | ENSP00000394400 |
| ENSP00000230859 | ENSP00000399530 |
| ENSP00000230859 | ENSP00000400626 |
| ENSP00000230859 | ENSP00000402338 |
| ENSP00000230859 | ENSP00000412310 |
| ENSP00000230859 | ENSP00000414321 |
| ENSP00000230882 | ENSP00000244007 |
| ENSP00000230882 | ENSP00000264818 |
| ENSP00000230882 | ENSP00000300574 |
| ENSP00000230882 | ENSP00000302150 |
| ENSP00000230882 | ENSP00000303554 |
| ENSP00000230882 | ENSP00000309524 |
| ENSP00000230882 | ENSP00000340944 |
| ENSP00000230882 | ENSP00000341208 |
| ENSP00000230882 | ENSP00000351894 |
| ENSP00000230882 | ENSP00000351926 |
| ENSP00000230882 | ENSP00000356346 |
| ENSP00000230882 | ENSP00000359206 |
| ENSP00000230882 | ENSP00000378394 |



|                 |                 |
|-----------------|-----------------|
| ENSP00000230882 | ENSP00000381793 |
| ENSP00000230882 | ENSP00000394794 |
| ENSP00000230882 | ENSP00000409346 |
| ENSP00000230895 | ENSP00000271643 |
| ENSP00000230990 | ENSP00000232014 |
| ENSP00000230990 | ENSP00000338157 |
| ENSP00000231198 | ENSP00000234296 |
| ENSP00000231198 | ENSP00000263791 |
| ENSP00000231198 | ENSP00000265840 |
| ENSP00000231198 | ENSP00000276603 |
| ENSP00000231198 | ENSP00000304668 |
| ENSP00000231198 | ENSP00000356562 |
| ENSP00000231198 | ENSP00000359976 |
| ENSP00000231198 | ENSP00000368305 |
| ENSP00000231228 | ENSP00000262345 |
| ENSP00000231228 | ENSP00000303231 |
| ENSP00000231228 | ENSP00000314425 |
| ENSP00000231238 | ENSP00000340237 |
| ENSP00000231238 | ENSP00000349016 |
| ENSP00000231238 | ENSP00000360141 |
| ENSP00000231357 | ENSP00000240587 |
| ENSP00000231357 | ENSP00000249442 |
| ENSP00000231357 | ENSP00000265354 |
| ENSP00000231357 | ENSP00000277541 |
| ENSP00000231357 | ENSP00000361990 |
| ENSP00000231368 | ENSP00000234296 |
| ENSP00000231368 | ENSP00000258774 |
| ENSP00000231368 | ENSP00000298852 |
| ENSP00000231368 | ENSP00000311579 |
| ENSP00000231368 | ENSP00000340879 |
| ENSP00000231368 | ENSP00000360621 |
| ENSP00000231368 | ENSP00000362399 |
| ENSP00000231368 | ENSP00000363873 |
| ENSP00000231420 | ENSP00000245206 |
| ENSP00000231420 | ENSP00000267845 |
| ENSP00000231420 | ENSP00000350928 |
| ENSP00000231420 | ENSP00000359518 |
| ENSP00000231420 | ENSP00000362298 |
| ENSP00000231420 | ENSP00000370611 |
| ENSP00000231449 | ENSP00000234396 |
| ENSP00000231449 | ENSP00000270776 |
| ENSP00000231449 | ENSP00000285046 |
| ENSP00000231449 | ENSP00000296137 |
| ENSP00000231449 | ENSP00000296328 |
| ENSP00000231449 | ENSP00000302478 |
| ENSP00000231449 | ENSP00000311430 |

|                 |                 |
|-----------------|-----------------|
| ENSP00000231449 | ENSP00000313420 |
| ENSP00000231449 | ENSP00000314949 |
| ENSP00000231449 | ENSP00000317955 |
| ENSP00000231449 | ENSP00000326534 |
| ENSP00000231449 | ENSP00000327821 |
| ENSP00000231449 | ENSP00000344446 |
| ENSP00000231449 | ENSP00000348577 |
| ENSP00000231449 | ENSP00000353393 |
| ENSP00000231449 | ENSP00000354558 |
| ENSP00000231449 | ENSP00000355205 |
| ENSP00000231449 | ENSP00000356548 |
| ENSP00000231449 | ENSP00000360730 |
| ENSP00000231449 | ENSP00000366135 |
| ENSP00000231449 | ENSP00000366843 |
| ENSP00000231449 | ENSP00000377954 |
| ENSP00000231449 | ENSP00000415203 |
| ENSP00000231454 | ENSP00000256452 |
| ENSP00000231454 | ENSP00000384053 |
| ENSP00000231487 | ENSP00000232014 |
| ENSP00000231487 | ENSP00000234396 |
| ENSP00000231487 | ENSP00000237281 |
| ENSP00000231487 | ENSP00000244426 |
| ENSP00000231487 | ENSP00000244741 |
| ENSP00000231487 | ENSP00000246548 |
| ENSP00000231487 | ENSP00000247977 |
| ENSP00000231487 | ENSP00000250003 |
| ENSP00000231487 | ENSP00000250615 |
| ENSP00000231487 | ENSP00000251038 |
| ENSP00000231487 | ENSP00000251076 |
| ENSP00000231487 | ENSP00000252602 |
| ENSP00000231487 | ENSP00000253003 |
| ENSP00000231487 | ENSP00000253413 |
| ENSP00000231487 | ENSP00000256379 |
| ENSP00000231487 | ENSP00000256897 |
| ENSP00000231487 | ENSP00000258200 |
| ENSP00000231487 | ENSP00000258873 |
| ENSP00000231487 | ENSP00000259803 |
| ENSP00000231487 | ENSP00000260766 |
| ENSP00000231487 | ENSP00000261245 |
| ENSP00000231487 | ENSP00000261712 |
| ENSP00000231487 | ENSP00000262133 |
| ENSP00000231487 | ENSP00000262306 |
| ENSP00000231487 | ENSP00000262367 |
| ENSP00000231487 | ENSP00000262643 |
| ENSP00000231487 | ENSP00000262644 |
| ENSP00000231487 | ENSP00000263026 |

|                 |                 |
|-----------------|-----------------|
| ENSP00000231487 | ENSP00000263201 |
| ENSP00000231487 | ENSP00000263228 |
| ENSP00000231487 | ENSP00000264198 |
| ENSP00000231487 | ENSP00000264389 |
| ENSP00000231487 | ENSP00000264552 |
| ENSP00000231487 | ENSP00000265056 |
| ENSP00000231487 | ENSP00000265148 |
| ENSP00000231487 | ENSP00000265651 |
| ENSP00000231487 | ENSP00000265960 |
| ENSP00000231487 | ENSP00000266087 |
| ENSP00000231487 | ENSP00000266126 |
| ENSP00000231487 | ENSP00000270225 |
| ENSP00000231487 | ENSP00000270861 |
| ENSP00000231487 | ENSP00000273398 |
| ENSP00000231487 | ENSP00000274255 |
| ENSP00000231487 | ENSP00000274289 |
| ENSP00000231487 | ENSP00000275015 |
| ENSP00000231487 | ENSP00000276326 |
| ENSP00000231487 | ENSP00000276603 |
| ENSP00000231487 | ENSP00000276893 |
| ENSP00000231487 | ENSP00000277865 |
| ENSP00000231487 | ENSP00000278616 |
| ENSP00000231487 | ENSP00000279230 |
| ENSP00000231487 | ENSP00000281623 |
| ENSP00000231487 | ENSP00000281708 |
| ENSP00000231487 | ENSP00000282892 |
| ENSP00000231487 | ENSP00000284202 |
| ENSP00000231487 | ENSP00000287598 |
| ENSP00000231487 | ENSP00000290810 |
| ENSP00000231487 | ENSP00000293860 |
| ENSP00000231487 | ENSP00000295066 |
| ENSP00000231487 | ENSP00000296328 |
| ENSP00000231487 | ENSP00000296438 |
| ENSP00000231487 | ENSP00000296509 |
| ENSP00000231487 | ENSP00000297185 |
| ENSP00000231487 | ENSP00000298097 |
| ENSP00000231487 | ENSP00000298852 |
| ENSP00000231487 | ENSP00000298937 |
| ENSP00000231487 | ENSP00000299259 |
| ENSP00000231487 | ENSP00000299543 |
| ENSP00000231487 | ENSP00000302530 |
| ENSP00000231487 | ENSP00000303208 |
| ENSP00000231487 | ENSP00000304102 |
| ENSP00000231487 | ENSP00000307786 |
| ENSP00000231487 | ENSP00000310040 |
| ENSP00000231487 | ENSP00000310332 |

|                 |                 |
|-----------------|-----------------|
| ENSP00000231487 | ENSP00000310841 |
| ENSP00000231487 | ENSP00000311083 |
| ENSP00000231487 | ENSP00000311505 |
| ENSP00000231487 | ENSP00000312870 |
| ENSP00000231487 | ENSP00000313034 |
| ENSP00000231487 | ENSP00000313159 |
| ENSP00000231487 | ENSP00000314004 |
| ENSP00000231487 | ENSP00000319482 |
| ENSP00000231487 | ENSP00000323687 |
| ENSP00000231487 | ENSP00000323822 |
| ENSP00000231487 | ENSP00000329967 |
| ENSP00000231487 | ENSP00000330098 |
| ENSP00000231487 | ENSP00000330484 |
| ENSP00000231487 | ENSP00000336842 |
| ENSP00000231487 | ENSP00000338413 |
| ENSP00000231487 | ENSP00000343741 |
| ENSP00000231487 | ENSP00000344456 |
| ENSP00000231487 | ENSP00000344866 |
| ENSP00000231487 | ENSP00000345988 |
| ENSP00000231487 | ENSP00000346240 |
| ENSP00000231487 | ENSP00000347733 |
| ENSP00000231487 | ENSP00000347836 |
| ENSP00000231487 | ENSP00000350009 |
| ENSP00000231487 | ENSP00000350012 |
| ENSP00000231487 | ENSP00000350512 |
| ENSP00000231487 | ENSP00000351052 |
| ENSP00000231487 | ENSP00000352121 |
| ENSP00000231487 | ENSP00000352522 |
| ENSP00000231487 | ENSP00000354201 |
| ENSP00000231487 | ENSP00000354340 |
| ENSP00000231487 | ENSP00000354558 |
| ENSP00000231487 | ENSP00000354720 |
| ENSP00000231487 | ENSP00000355384 |
| ENSP00000231487 | ENSP00000355511 |
| ENSP00000231487 | ENSP00000355827 |
| ENSP00000231487 | ENSP00000356211 |
| ENSP00000231487 | ENSP00000356652 |
| ENSP00000231487 | ENSP00000358022 |
| ENSP00000231487 | ENSP00000359096 |
| ENSP00000231487 | ENSP00000359100 |
| ENSP00000231487 | ENSP00000359206 |
| ENSP00000231487 | ENSP00000360116 |
| ENSP00000231487 | ENSP00000360992 |
| ENSP00000231487 | ENSP00000361965 |
| ENSP00000231487 | ENSP00000362110 |
| ENSP00000231487 | ENSP00000362334 |

|                 |                 |
|-----------------|-----------------|
| ENSP00000231487 | ENSP00000362413 |
| ENSP00000231487 | ENSP00000363779 |
| ENSP00000231487 | ENSP00000364742 |
| ENSP00000231487 | ENSP00000365534 |
| ENSP00000231487 | ENSP00000366271 |
| ENSP00000231487 | ENSP00000366620 |
| ENSP00000231487 | ENSP00000367208 |
| ENSP00000231487 | ENSP00000367319 |
| ENSP00000231487 | ENSP00000367705 |
| ENSP00000231487 | ENSP00000368438 |
| ENSP00000231487 | ENSP00000368589 |
| ENSP00000231487 | ENSP00000369335 |
| ENSP00000231487 | ENSP00000375082 |
| ENSP00000231487 | ENSP00000376945 |
| ENSP00000231487 | ENSP00000377280 |
| ENSP00000231487 | ENSP00000379430 |
| ENSP00000231487 | ENSP00000379457 |
| ENSP00000231487 | ENSP00000379607 |
| ENSP00000231487 | ENSP00000380256 |
| ENSP00000231487 | ENSP00000381863 |
| ENSP00000231487 | ENSP00000383719 |
| ENSP00000231487 | ENSP00000384109 |
| ENSP00000231487 | ENSP00000389934 |
| ENSP00000231487 | ENSP00000393154 |
| ENSP00000231487 | ENSP00000393596 |
| ENSP00000231487 | ENSP00000394071 |
| ENSP00000231487 | ENSP00000394869 |
| ENSP00000231487 | ENSP00000395574 |
| ENSP00000231487 | ENSP00000401566 |
| ENSP00000231487 | ENSP00000413720 |
| ENSP00000231487 | ENSP00000419494 |
| ENSP00000231498 | ENSP00000238112 |
| ENSP00000231498 | ENSP00000245544 |
| ENSP00000231498 | ENSP00000247970 |
| ENSP00000231498 | ENSP00000251038 |
| ENSP00000231498 | ENSP00000252115 |
| ENSP00000231498 | ENSP00000255465 |
| ENSP00000231498 | ENSP00000256442 |
| ENSP00000231498 | ENSP00000261396 |
| ENSP00000231498 | ENSP00000261531 |
| ENSP00000231498 | ENSP00000262077 |
| ENSP00000231498 | ENSP00000262193 |
| ENSP00000231498 | ENSP00000262643 |
| ENSP00000231498 | ENSP00000262765 |
| ENSP00000231498 | ENSP00000262982 |
| ENSP00000231498 | ENSP00000264883 |

|                 |                 |
|-----------------|-----------------|
| ENSP00000231498 | ENSP00000265056 |
| ENSP00000231498 | ENSP00000270223 |
| ENSP00000231498 | ENSP00000283195 |
| ENSP00000231498 | ENSP00000290158 |
| ENSP00000231498 | ENSP00000290231 |
| ENSP00000231498 | ENSP00000290541 |
| ENSP00000231498 | ENSP00000291688 |
| ENSP00000231498 | ENSP00000294008 |
| ENSP00000231498 | ENSP00000296411 |
| ENSP00000231498 | ENSP00000296509 |
| ENSP00000231498 | ENSP00000296577 |
| ENSP00000231498 | ENSP00000296755 |
| ENSP00000231498 | ENSP00000298139 |
| ENSP00000231498 | ENSP00000300231 |
| ENSP00000231498 | ENSP00000301364 |
| ENSP00000231498 | ENSP00000302886 |
| ENSP00000231498 | ENSP00000307939 |
| ENSP00000231498 | ENSP00000308622 |
| ENSP00000231498 | ENSP00000310668 |
| ENSP00000231498 | ENSP00000314129 |
| ENSP00000231498 | ENSP00000314440 |
| ENSP00000231498 | ENSP00000315791 |
| ENSP00000231498 | ENSP00000316032 |
| ENSP00000231498 | ENSP00000317334 |
| ENSP00000231498 | ENSP00000325312 |
| ENSP00000231498 | ENSP00000329466 |
| ENSP00000231498 | ENSP00000331817 |
| ENSP00000231498 | ENSP00000335357 |
| ENSP00000231498 | ENSP00000336712 |
| ENSP00000231498 | ENSP00000343701 |
| ENSP00000231498 | ENSP00000347232 |
| ENSP00000231498 | ENSP00000348577 |
| ENSP00000231498 | ENSP00000351284 |
| ENSP00000231498 | ENSP00000352021 |
| ENSP00000231498 | ENSP00000352400 |
| ENSP00000231498 | ENSP00000354742 |
| ENSP00000231498 | ENSP00000356548 |
| ENSP00000231498 | ENSP00000360286 |
| ENSP00000231498 | ENSP00000360532 |
| ENSP00000231498 | ENSP00000362900 |
| ENSP00000231498 | ENSP00000368797 |
| ENSP00000231498 | ENSP00000369042 |
| ENSP00000231498 | ENSP00000371155 |
| ENSP00000231498 | ENSP00000372857 |
| ENSP00000231498 | ENSP00000373918 |
| ENSP00000231498 | ENSP00000379568 |

|                 |                 |
|-----------------|-----------------|
| ENSP00000231498 | ENSP00000379607 |
| ENSP00000231498 | ENSP00000382779 |
| ENSP00000231498 | ENSP00000386992 |
| ENSP00000231498 | ENSP00000413632 |
| ENSP00000231524 | ENSP00000250113 |
| ENSP00000231524 | ENSP00000251968 |
| ENSP00000231524 | ENSP00000254336 |
| ENSP00000231524 | ENSP00000257909 |
| ENSP00000231524 | ENSP00000263925 |
| ENSP00000231524 | ENSP00000264926 |
| ENSP00000231524 | ENSP00000269122 |
| ENSP00000231524 | ENSP00000279036 |
| ENSP00000231524 | ENSP00000292180 |
| ENSP00000231524 | ENSP00000292363 |
| ENSP00000231524 | ENSP00000298295 |
| ENSP00000231524 | ENSP00000299853 |
| ENSP00000231524 | ENSP00000300245 |
| ENSP00000231524 | ENSP00000313881 |
| ENSP00000231524 | ENSP00000315950 |
| ENSP00000231524 | ENSP00000323913 |
| ENSP00000231524 | ENSP00000328203 |
| ENSP00000231524 | ENSP00000342087 |
| ENSP00000231524 | ENSP00000343129 |
| ENSP00000231524 | ENSP00000347836 |
| ENSP00000231524 | ENSP00000359000 |
| ENSP00000231524 | ENSP00000360116 |
| ENSP00000231524 | ENSP00000360183 |
| ENSP00000231524 | ENSP00000363095 |
| ENSP00000231524 | ENSP00000365924 |
| ENSP00000231524 | ENSP00000366607 |
| ENSP00000231524 | ENSP00000370410 |
| ENSP00000231524 | ENSP00000376871 |
| ENSP00000231524 | ENSP00000398677 |
| ENSP00000231524 | ENSP00000408236 |
| ENSP00000231524 | ENSP00000417281 |
| ENSP00000231572 | ENSP00000256854 |
| ENSP00000231572 | ENSP00000259075 |
| ENSP00000231572 | ENSP00000262027 |
| ENSP00000231572 | ENSP00000264161 |
| ENSP00000231572 | ENSP00000268835 |
| ENSP00000231572 | ENSP00000275015 |
| ENSP00000231572 | ENSP00000282276 |
| ENSP00000231572 | ENSP00000296509 |
| ENSP00000231572 | ENSP00000303279 |
| ENSP00000231572 | ENSP00000307567 |
| ENSP00000231572 | ENSP00000315859 |

|                 |                 |
|-----------------|-----------------|
| ENSP00000231572 | ENSP00000348442 |
| ENSP00000231572 | ENSP00000355890 |
| ENSP00000231572 | ENSP00000364794 |
| ENSP00000231572 | ENSP00000364815 |
| ENSP00000231572 | ENSP00000368790 |
| ENSP00000231572 | ENSP00000369038 |
| ENSP00000231572 | ENSP00000370408 |
| ENSP00000231572 | ENSP00000377954 |
| ENSP00000231572 | ENSP00000379607 |
| ENSP00000231572 | ENSP00000401121 |
| ENSP00000231572 | ENSP00000403359 |
| ENSP00000231572 | ENSP00000415316 |
| ENSP00000231668 | ENSP00000236192 |
| ENSP00000231668 | ENSP00000263897 |
| ENSP00000231668 | ENSP00000286448 |
| ENSP00000231668 | ENSP00000294179 |
| ENSP00000231668 | ENSP00000305255 |
| ENSP00000231668 | ENSP00000305810 |
| ENSP00000231668 | ENSP00000320508 |
| ENSP00000231668 | ENSP00000324628 |
| ENSP00000231668 | ENSP00000329623 |
| ENSP00000231668 | ENSP00000364289 |
| ENSP00000231668 | ENSP00000374455 |
| ENSP00000231668 | ENSP00000381293 |
| ENSP00000231668 | ENSP00000390783 |
| ENSP00000231706 | ENSP00000353073 |
| ENSP00000231749 | ENSP00000300181 |
| ENSP00000231749 | ENSP00000306906 |
| ENSP00000231790 | ENSP00000233146 |
| ENSP00000231790 | ENSP00000234420 |
| ENSP00000231790 | ENSP00000234626 |
| ENSP00000231790 | ENSP00000249910 |
| ENSP00000231790 | ENSP00000258428 |
| ENSP00000231790 | ENSP00000259008 |
| ENSP00000231790 | ENSP00000260947 |
| ENSP00000231790 | ENSP00000261424 |
| ENSP00000231790 | ENSP00000261531 |
| ENSP00000231790 | ENSP00000261881 |
| ENSP00000231790 | ENSP00000263187 |
| ENSP00000231790 | ENSP00000264169 |
| ENSP00000231790 | ENSP00000264951 |
| ENSP00000231790 | ENSP00000265081 |
| ENSP00000231790 | ENSP00000265433 |
| ENSP00000231790 | ENSP00000265849 |
| ENSP00000231790 | ENSP00000265970 |
| ENSP00000231790 | ENSP00000267430 |



|                 |                 |
|-----------------|-----------------|
| ENSP00000231790 | ENSP00000278616 |
| ENSP00000231790 | ENSP00000282050 |
| ENSP00000231790 | ENSP00000285021 |
| ENSP00000231790 | ENSP00000286800 |
| ENSP00000231790 | ENSP00000287295 |
| ENSP00000231790 | ENSP00000287647 |
| ENSP00000231790 | ENSP00000290158 |
| ENSP00000231790 | ENSP00000307853 |
| ENSP00000231790 | ENSP00000310520 |
| ENSP00000231790 | ENSP00000311766 |
| ENSP00000231790 | ENSP00000311873 |
| ENSP00000231790 | ENSP00000313420 |
| ENSP00000231790 | ENSP00000318977 |
| ENSP00000231790 | ENSP00000322570 |
| ENSP00000231790 | ENSP00000324127 |
| ENSP00000231790 | ENSP00000324463 |
| ENSP00000231790 | ENSP00000325863 |
| ENSP00000231790 | ENSP00000330343 |
| ENSP00000231790 | ENSP00000333253 |
| ENSP00000231790 | ENSP00000343129 |
| ENSP00000231790 | ENSP00000343190 |
| ENSP00000231790 | ENSP00000346236 |
| ENSP00000231790 | ENSP00000347232 |
| ENSP00000231790 | ENSP00000348020 |
| ENSP00000231790 | ENSP00000348550 |
| ENSP00000231790 | ENSP00000350283 |
| ENSP00000231790 | ENSP00000351284 |
| ENSP00000231790 | ENSP00000351697 |
| ENSP00000231790 | ENSP00000354497 |
| ENSP00000231790 | ENSP00000355185 |
| ENSP00000231790 | ENSP00000357283 |
| ENSP00000231790 | ENSP00000358576 |
| ENSP00000231790 | ENSP00000359652 |
| ENSP00000231790 | ENSP00000361027 |
| ENSP00000231790 | ENSP00000361310 |
| ENSP00000231790 | ENSP00000364270 |
| ENSP00000231790 | ENSP00000367527 |
| ENSP00000231790 | ENSP00000368349 |
| ENSP00000231790 | ENSP00000368438 |
| ENSP00000231790 | ENSP00000369335 |
| ENSP00000231790 | ENSP00000369618 |
| ENSP00000231790 | ENSP00000377865 |
| ENSP00000231790 | ENSP00000378306 |
| ENSP00000231790 | ENSP00000406490 |
| ENSP00000231948 | ENSP00000301764 |
| ENSP00000231948 | ENSP00000304102 |

|                 |                 |
|-----------------|-----------------|
| ENSP00000231948 | ENSP00000339867 |
| ENSP00000232003 | ENSP00000267101 |
| ENSP00000232003 | ENSP00000306361 |
| ENSP00000232003 | ENSP00000321239 |
| ENSP00000232003 | ENSP00000343785 |
| ENSP00000232003 | ENSP00000346839 |
| ENSP00000232014 | ENSP00000247970 |
| ENSP00000232014 | ENSP00000249373 |
| ENSP00000232014 | ENSP00000250894 |
| ENSP00000232014 | ENSP00000251871 |
| ENSP00000232014 | ENSP00000256379 |
| ENSP00000232014 | ENSP00000257749 |
| ENSP00000232014 | ENSP00000261708 |
| ENSP00000232014 | ENSP00000262238 |
| ENSP00000232014 | ENSP00000262367 |
| ENSP00000232014 | ENSP00000262904 |
| ENSP00000232014 | ENSP00000264380 |
| ENSP00000232014 | ENSP00000268058 |
| ENSP00000232014 | ENSP00000270225 |
| ENSP00000232014 | ENSP00000284719 |
| ENSP00000232014 | ENSP00000300101 |
| ENSP00000232014 | ENSP00000303315 |
| ENSP00000232014 | ENSP00000304803 |
| ENSP00000232014 | ENSP00000307235 |
| ENSP00000232014 | ENSP00000310596 |
| ENSP00000232014 | ENSP00000314444 |
| ENSP00000232014 | ENSP00000320291 |
| ENSP00000232014 | ENSP00000320485 |
| ENSP00000232014 | ENSP00000323822 |
| ENSP00000232014 | ENSP00000328103 |
| ENSP00000232014 | ENSP00000329357 |
| ENSP00000232014 | ENSP00000338157 |
| ENSP00000232014 | ENSP00000339845 |
| ENSP00000232014 | ENSP00000342307 |
| ENSP00000232014 | ENSP00000347978 |
| ENSP00000232014 | ENSP00000348551 |
| ENSP00000232014 | ENSP00000353362 |
| ENSP00000232014 | ENSP00000353622 |
| ENSP00000232014 | ENSP00000357047 |
| ENSP00000232014 | ENSP00000357907 |
| ENSP00000232014 | ENSP00000359988 |
| ENSP00000232014 | ENSP00000364912 |
| ENSP00000232014 | ENSP00000367705 |
| ENSP00000232014 | ENSP00000369716 |
| ENSP00000232014 | ENSP00000377655 |
| ENSP00000232014 | ENSP00000384434 |

|                 |                 |
|-----------------|-----------------|
| ENSP00000232014 | ENSP00000417980 |
| ENSP00000232014 | ENSP00000418210 |
| ENSP00000232424 | ENSP00000262367 |
| ENSP00000232424 | ENSP00000266744 |
| ENSP00000232424 | ENSP00000272937 |
| ENSP00000232424 | ENSP00000277541 |
| ENSP00000232424 | ENSP00000289081 |
| ENSP00000232424 | ENSP00000302216 |
| ENSP00000232424 | ENSP00000311825 |
| ENSP00000232424 | ENSP00000314949 |
| ENSP00000232424 | ENSP00000330875 |
| ENSP00000232424 | ENSP00000331057 |
| ENSP00000232424 | ENSP00000339004 |
| ENSP00000232424 | ENSP00000347140 |
| ENSP00000232424 | ENSP00000352514 |
| ENSP00000232424 | ENSP00000353735 |
| ENSP00000232424 | ENSP00000355759 |
| ENSP00000232424 | ENSP00000357348 |
| ENSP00000232424 | ENSP00000358105 |
| ENSP00000232424 | ENSP00000358417 |
| ENSP00000232424 | ENSP00000361824 |
| ENSP00000232424 | ENSP00000365735 |
| ENSP00000232424 | ENSP00000367910 |
| ENSP00000232424 | ENSP00000367972 |
| ENSP00000232424 | ENSP00000373952 |
| ENSP00000232424 | ENSP00000385021 |
| ENSP00000232458 | ENSP00000256442 |
| ENSP00000232458 | ENSP00000260363 |
| ENSP00000232458 | ENSP00000261833 |
| ENSP00000232458 | ENSP00000262643 |
| ENSP00000232458 | ENSP00000270861 |
| ENSP00000232458 | ENSP00000276014 |
| ENSP00000232458 | ENSP00000309871 |
| ENSP00000232458 | ENSP00000317985 |
| ENSP00000232458 | ENSP00000333950 |
| ENSP00000232458 | ENSP00000348349 |
| ENSP00000232458 | ENSP00000355731 |
| ENSP00000232458 | ENSP00000360532 |
| ENSP00000232458 | ENSP00000363921 |
| ENSP00000232458 | ENSP00000378624 |
| ENSP00000232458 | ENSP00000381045 |
| ENSP00000232458 | ENSP00000381565 |
| ENSP00000232458 | ENSP00000381577 |
| ENSP00000232496 | ENSP00000350447 |
| ENSP00000232501 | ENSP00000247977 |
| ENSP00000232501 | ENSP00000262144 |

|                 |                 |
|-----------------|-----------------|
| ENSP00000232501 | ENSP00000293883 |
| ENSP00000232501 | ENSP00000318674 |
| ENSP00000232501 | ENSP00000321386 |
| ENSP00000232501 | ENSP00000321927 |
| ENSP00000232501 | ENSP00000330098 |
| ENSP00000232501 | ENSP00000339881 |
| ENSP00000232501 | ENSP00000366135 |
| ENSP00000232501 | ENSP00000366271 |
| ENSP00000232501 | ENSP00000371546 |
| ENSP00000232501 | ENSP00000382779 |
| ENSP00000232501 | ENSP00000382834 |
| ENSP00000232501 | ENSP00000398028 |
| ENSP00000232501 | ENSP00000418111 |
| ENSP00000232607 | ENSP00000251038 |
| ENSP00000232607 | ENSP00000255465 |
| ENSP00000232607 | ENSP00000256442 |
| ENSP00000232607 | ENSP00000263246 |
| ENSP00000232607 | ENSP00000267103 |
| ENSP00000232607 | ENSP00000278060 |
| ENSP00000232607 | ENSP00000278412 |
| ENSP00000232607 | ENSP00000290332 |
| ENSP00000232607 | ENSP00000300231 |
| ENSP00000232607 | ENSP00000300648 |
| ENSP00000232607 | ENSP00000302640 |
| ENSP00000232607 | ENSP00000302955 |
| ENSP00000232607 | ENSP00000320646 |
| ENSP00000232607 | ENSP00000331719 |
| ENSP00000232607 | ENSP00000336856 |
| ENSP00000232607 | ENSP00000343190 |
| ENSP00000232607 | ENSP00000345681 |
| ENSP00000232607 | ENSP00000346050 |
| ENSP00000232607 | ENSP00000346155 |
| ENSP00000232607 | ENSP00000352706 |
| ENSP00000232607 | ENSP00000354522 |
| ENSP00000232607 | ENSP00000355922 |
| ENSP00000232607 | ENSP00000360532 |
| ENSP00000232607 | ENSP00000361642 |
| ENSP00000232607 | ENSP00000365534 |
| ENSP00000232607 | ENSP00000366030 |
| ENSP00000232607 | ENSP00000367029 |
| ENSP00000232607 | ENSP00000368439 |
| ENSP00000232607 | ENSP00000369100 |
| ENSP00000232607 | ENSP00000379339 |
| ENSP00000232607 | ENSP00000420588 |
| ENSP00000232744 | ENSP00000251038 |
| ENSP00000232744 | ENSP00000273480 |

|                 |                 |
|-----------------|-----------------|
| ENSP00000232744 | ENSP00000358147 |
| ENSP00000232744 | ENSP00000361705 |
| ENSP00000232744 | ENSP00000384109 |
| ENSP00000232854 | ENSP00000253233 |
| ENSP00000232854 | ENSP00000265857 |
| ENSP00000232854 | ENSP00000353741 |
| ENSP00000232854 | ENSP00000359904 |
| ENSP00000232854 | ENSP00000368790 |
| ENSP00000232888 | ENSP00000243563 |
| ENSP00000232888 | ENSP00000244230 |
| ENSP00000232888 | ENSP00000257829 |
| ENSP00000232888 | ENSP00000261637 |
| ENSP00000232888 | ENSP00000261708 |
| ENSP00000232888 | ENSP00000262265 |
| ENSP00000232888 | ENSP00000267425 |
| ENSP00000232888 | ENSP00000275820 |
| ENSP00000232888 | ENSP00000280350 |
| ENSP00000232888 | ENSP00000285873 |
| ENSP00000232888 | ENSP00000291576 |
| ENSP00000232888 | ENSP00000296792 |
| ENSP00000232888 | ENSP00000297579 |
| ENSP00000232888 | ENSP00000297990 |
| ENSP00000232888 | ENSP00000298292 |
| ENSP00000232888 | ENSP00000308179 |
| ENSP00000232888 | ENSP00000311028 |
| ENSP00000232888 | ENSP00000311135 |
| ENSP00000232888 | ENSP00000314193 |
| ENSP00000232888 | ENSP00000315674 |
| ENSP00000232888 | ENSP00000321449 |
| ENSP00000232888 | ENSP00000321810 |
| ENSP00000232888 | ENSP00000323302 |
| ENSP00000232888 | ENSP00000326981 |
| ENSP00000232888 | ENSP00000327179 |
| ENSP00000232888 | ENSP00000328854 |
| ENSP00000232888 | ENSP00000329466 |
| ENSP00000232888 | ENSP00000339145 |
| ENSP00000232888 | ENSP00000353246 |
| ENSP00000232888 | ENSP00000354040 |
| ENSP00000232888 | ENSP00000355471 |
| ENSP00000232888 | ENSP00000355541 |
| ENSP00000232888 | ENSP00000358812 |
| ENSP00000232888 | ENSP00000360327 |
| ENSP00000232888 | ENSP00000363313 |
| ENSP00000232888 | ENSP00000363642 |
| ENSP00000232888 | ENSP00000363746 |
| ENSP00000232888 | ENSP00000370258 |

|                 |                 |
|-----------------|-----------------|
| ENSP00000232888 | ENSP00000370589 |
| ENSP00000232888 | ENSP00000371169 |
| ENSP00000232888 | ENSP00000372695 |
| ENSP00000232888 | ENSP00000378529 |
| ENSP00000232888 | ENSP00000384302 |
| ENSP00000232888 | ENSP00000399454 |
| ENSP00000232888 | ENSP00000402869 |
| ENSP00000232888 | ENSP00000405614 |
| ENSP00000232905 | ENSP00000240922 |
| ENSP00000232905 | ENSP00000241600 |
| ENSP00000232905 | ENSP00000245539 |
| ENSP00000232905 | ENSP00000246337 |
| ENSP00000232905 | ENSP00000253108 |
| ENSP00000232905 | ENSP00000256383 |
| ENSP00000232905 | ENSP00000258455 |
| ENSP00000232905 | ENSP00000260129 |
| ENSP00000232905 | ENSP00000261868 |
| ENSP00000232905 | ENSP00000262803 |
| ENSP00000232905 | ENSP00000265753 |
| ENSP00000232905 | ENSP00000266126 |
| ENSP00000232905 | ENSP00000270625 |
| ENSP00000232905 | ENSP00000271764 |
| ENSP00000232905 | ENSP00000272418 |
| ENSP00000232905 | ENSP00000274606 |
| ENSP00000232905 | ENSP00000276201 |
| ENSP00000232905 | ENSP00000278572 |
| ENSP00000232905 | ENSP00000278618 |
| ENSP00000232905 | ENSP00000283109 |
| ENSP00000232905 | ENSP00000283875 |
| ENSP00000232905 | ENSP00000295930 |
| ENSP00000232905 | ENSP00000296674 |
| ENSP00000232905 | ENSP00000296802 |
| ENSP00000232905 | ENSP00000301364 |
| ENSP00000232905 | ENSP00000302768 |
| ENSP00000232905 | ENSP00000302896 |
| ENSP00000232905 | ENSP00000304854 |
| ENSP00000232905 | ENSP00000310129 |
| ENSP00000232905 | ENSP00000311028 |
| ENSP00000232905 | ENSP00000316879 |
| ENSP00000232905 | ENSP00000317376 |
| ENSP00000232905 | ENSP00000318646 |
| ENSP00000232905 | ENSP00000323856 |
| ENSP00000232905 | ENSP00000326981 |
| ENSP00000232905 | ENSP00000331019 |
| ENSP00000232905 | ENSP00000336702 |
| ENSP00000232905 | ENSP00000338235 |

|                 |                 |
|-----------------|-----------------|
| ENSP00000232905 | ENSP00000339095 |
| ENSP00000232905 | ENSP00000339844 |
| ENSP00000232905 | ENSP00000340281 |
| ENSP00000232905 | ENSP00000341885 |
| ENSP00000232905 | ENSP00000346050 |
| ENSP00000232905 | ENSP00000346067 |
| ENSP00000232905 | ENSP00000352738 |
| ENSP00000232905 | ENSP00000353393 |
| ENSP00000232905 | ENSP00000354125 |
| ENSP00000232905 | ENSP00000354919 |
| ENSP00000232905 | ENSP00000357051 |
| ENSP00000232905 | ENSP00000358140 |
| ENSP00000232905 | ENSP00000360473 |
| ENSP00000232905 | ENSP00000362576 |
| ENSP00000232905 | ENSP00000362688 |
| ENSP00000232905 | ENSP00000362744 |
| ENSP00000232905 | ENSP00000363308 |
| ENSP00000232905 | ENSP00000363921 |
| ENSP00000232905 | ENSP00000364119 |
| ENSP00000232905 | ENSP00000368927 |
| ENSP00000232905 | ENSP00000369038 |
| ENSP00000232905 | ENSP00000369757 |
| ENSP00000232905 | ENSP00000370258 |
| ENSP00000232905 | ENSP00000371475 |
| ENSP00000232905 | ENSP00000379339 |
| ENSP00000232905 | ENSP00000379888 |
| ENSP00000232905 | ENSP00000380431 |
| ENSP00000232905 | ENSP00000384474 |
| ENSP00000232905 | ENSP00000393241 |
| ENSP00000232905 | ENSP00000396937 |
| ENSP00000232905 | ENSP00000403175 |
| ENSP00000232905 | ENSP00000412583 |
| ENSP00000232905 | ENSP00000414321 |
| ENSP00000232905 | ENSP00000416110 |
| ENSP00000232905 | ENSP00000417229 |
| ENSP00000232905 | ENSP00000420714 |
| ENSP00000232978 | ENSP00000233623 |
| ENSP00000232978 | ENSP00000283351 |
| ENSP00000232978 | ENSP00000294053 |
| ENSP00000232978 | ENSP00000305958 |
| ENSP00000232978 | ENSP00000315859 |
| ENSP00000232978 | ENSP00000326424 |
| ENSP00000232978 | ENSP00000336724 |
| ENSP00000232978 | ENSP00000345793 |
| ENSP00000232978 | ENSP00000346791 |
| ENSP00000232978 | ENSP00000348551 |

|                 |                 |
|-----------------|-----------------|
| ENSP00000232978 | ENSP00000356579 |
| ENSP00000232978 | ENSP00000360183 |
| ENSP00000232978 | ENSP00000360329 |
| ENSP00000232978 | ENSP00000365439 |
| ENSP00000232978 | ENSP00000366843 |
| ENSP00000232978 | ENSP00000367208 |
| ENSP00000232978 | ENSP00000368976 |
| ENSP00000232978 | ENSP00000381003 |
| ENSP00000232978 | ENSP00000386621 |
| ENSP00000233055 | ENSP00000245923 |
| ENSP00000233055 | ENSP00000251775 |
| ENSP00000233055 | ENSP00000267484 |
| ENSP00000233055 | ENSP00000273258 |
| ENSP00000233055 | ENSP00000337838 |
| ENSP00000233055 | ENSP00000344106 |
| ENSP00000233055 | ENSP00000363349 |
| ENSP00000233057 | ENSP00000236051 |
| ENSP00000233057 | ENSP00000246802 |
| ENSP00000233057 | ENSP00000256383 |
| ENSP00000233057 | ENSP00000260045 |
| ENSP00000233057 | ENSP00000260956 |
| ENSP00000233057 | ENSP00000263666 |
| ENSP00000233057 | ENSP00000264818 |
| ENSP00000233057 | ENSP00000266987 |
| ENSP00000233057 | ENSP00000281828 |
| ENSP00000233057 | ENSP00000289081 |
| ENSP00000233057 | ENSP00000296930 |
| ENSP00000233057 | ENSP00000314733 |
| ENSP00000233057 | ENSP00000318944 |
| ENSP00000233057 | ENSP00000320309 |
| ENSP00000233057 | ENSP00000325312 |
| ENSP00000233057 | ENSP00000325794 |
| ENSP00000233057 | ENSP00000341551 |
| ENSP00000233057 | ENSP00000342755 |
| ENSP00000233057 | ENSP00000343745 |
| ENSP00000233057 | ENSP00000344352 |
| ENSP00000233057 | ENSP00000345917 |
| ENSP00000233057 | ENSP00000350869 |
| ENSP00000233057 | ENSP00000351811 |
| ENSP00000233057 | ENSP00000351908 |
| ENSP00000233057 | ENSP00000354040 |
| ENSP00000233057 | ENSP00000354522 |
| ENSP00000233057 | ENSP00000355011 |
| ENSP00000233057 | ENSP00000356520 |
| ENSP00000233057 | ENSP00000356641 |
| ENSP00000233057 | ENSP00000358335 |



|                 |                 |
|-----------------|-----------------|
| ENSP00000233057 | ENSP00000358854 |
| ENSP00000233057 | ENSP00000360412 |
| ENSP00000233057 | ENSP00000360922 |
| ENSP00000233057 | ENSP00000361202 |
| ENSP00000233057 | ENSP00000361949 |
| ENSP00000233057 | ENSP00000363559 |
| ENSP00000233057 | ENSP00000365016 |
| ENSP00000233057 | ENSP00000376445 |
| ENSP00000233057 | ENSP00000381010 |
| ENSP00000233057 | ENSP00000382392 |
| ENSP00000233057 | ENSP00000384391 |
| ENSP00000233057 | ENSP00000392601 |
| ENSP00000233057 | ENSP00000401980 |
| ENSP00000233057 | ENSP00000404121 |
| ENSP00000233078 | ENSP00000234677 |
| ENSP00000233078 | ENSP00000251038 |
| ENSP00000233078 | ENSP00000261951 |
| ENSP00000233078 | ENSP00000262803 |
| ENSP00000233078 | ENSP00000266744 |
| ENSP00000233078 | ENSP00000285896 |
| ENSP00000233078 | ENSP00000301364 |
| ENSP00000233078 | ENSP00000304704 |
| ENSP00000233078 | ENSP00000315791 |
| ENSP00000233078 | ENSP00000316032 |
| ENSP00000233078 | ENSP00000320949 |
| ENSP00000233078 | ENSP00000325376 |
| ENSP00000233078 | ENSP00000331879 |
| ENSP00000233078 | ENSP00000332444 |
| ENSP00000233078 | ENSP00000336712 |
| ENSP00000233078 | ENSP00000346453 |
| ENSP00000233078 | ENSP00000348708 |
| ENSP00000233078 | ENSP00000351284 |
| ENSP00000233078 | ENSP00000354522 |
| ENSP00000233078 | ENSP00000354673 |
| ENSP00000233078 | ENSP00000359531 |
| ENSP00000233078 | ENSP00000362900 |
| ENSP00000233078 | ENSP00000379607 |
| ENSP00000233078 | ENSP00000384573 |
| ENSP00000233078 | ENSP00000416829 |
| ENSP00000233084 | ENSP00000234170 |
| ENSP00000233084 | ENSP00000236051 |
| ENSP00000233084 | ENSP00000238823 |
| ENSP00000233084 | ENSP00000251038 |
| ENSP00000233084 | ENSP00000251607 |
| ENSP00000233084 | ENSP00000252622 |
| ENSP00000233084 | ENSP00000254940 |

|                 |                 |
|-----------------|-----------------|
| ENSP00000233084 | ENSP00000256398 |
| ENSP00000233084 | ENSP00000257829 |
| ENSP00000233084 | ENSP00000261531 |
| ENSP00000233084 | ENSP00000261700 |
| ENSP00000233084 | ENSP00000261708 |
| ENSP00000233084 | ENSP00000263629 |
| ENSP00000233084 | ENSP00000265433 |
| ENSP00000233084 | ENSP00000267812 |
| ENSP00000233084 | ENSP00000278616 |
| ENSP00000233084 | ENSP00000289371 |
| ENSP00000233084 | ENSP00000296802 |
| ENSP00000233084 | ENSP00000301740 |
| ENSP00000233084 | ENSP00000311430 |
| ENSP00000233084 | ENSP00000319977 |
| ENSP00000233084 | ENSP00000321711 |
| ENSP00000233084 | ENSP00000322396 |
| ENSP00000233084 | ENSP00000325863 |
| ENSP00000233084 | ENSP00000329715 |
| ENSP00000233084 | ENSP00000338862 |
| ENSP00000233084 | ENSP00000343557 |
| ENSP00000233084 | ENSP00000346022 |
| ENSP00000233084 | ENSP00000353246 |
| ENSP00000233084 | ENSP00000354040 |
| ENSP00000233084 | ENSP00000356785 |
| ENSP00000233084 | ENSP00000358812 |
| ENSP00000233084 | ENSP00000359345 |
| ENSP00000233084 | ENSP00000360412 |
| ENSP00000233084 | ENSP00000361465 |
| ENSP00000233084 | ENSP00000363676 |
| ENSP00000233084 | ENSP00000365439 |
| ENSP00000233084 | ENSP00000379607 |
| ENSP00000233084 | ENSP00000380982 |
| ENSP00000233084 | ENSP00000393953 |
| ENSP00000233084 | ENSP00000402338 |
| ENSP00000233099 | ENSP00000256658 |
| ENSP00000233099 | ENSP00000261842 |
| ENSP00000233099 | ENSP00000263121 |
| ENSP00000233099 | ENSP00000264639 |
| ENSP00000233099 | ENSP00000265742 |
| ENSP00000233099 | ENSP00000269122 |
| ENSP00000233099 | ENSP00000340944 |
| ENSP00000233099 | ENSP00000351926 |
| ENSP00000233099 | ENSP00000377148 |
| ENSP00000233099 | ENSP00000396704 |
| ENSP00000233146 | ENSP00000234420 |
| ENSP00000233146 | ENSP00000241436 |

|                 |                 |
|-----------------|-----------------|
| ENSP00000233146 | ENSP00000244745 |
| ENSP00000233146 | ENSP00000245479 |
| ENSP00000233146 | ENSP00000251038 |
| ENSP00000233146 | ENSP00000254719 |
| ENSP00000233146 | ENSP00000256996 |
| ENSP00000233146 | ENSP00000258428 |
| ENSP00000233146 | ENSP00000259008 |
| ENSP00000233146 | ENSP00000260947 |
| ENSP00000233146 | ENSP00000261424 |
| ENSP00000233146 | ENSP00000261531 |
| ENSP00000233146 | ENSP00000261637 |
| ENSP00000233146 | ENSP00000262315 |
| ENSP00000233146 | ENSP00000262367 |
| ENSP00000233146 | ENSP00000263795 |
| ENSP00000233146 | ENSP00000264233 |
| ENSP00000233146 | ENSP00000265007 |
| ENSP00000233146 | ENSP00000265081 |
| ENSP00000233146 | ENSP00000265304 |
| ENSP00000233146 | ENSP00000265433 |
| ENSP00000233146 | ENSP00000265849 |
| ENSP00000233146 | ENSP00000267064 |
| ENSP00000233146 | ENSP00000267430 |
| ENSP00000233146 | ENSP00000268124 |
| ENSP00000233146 | ENSP00000269397 |
| ENSP00000233146 | ENSP00000270708 |
| ENSP00000233146 | ENSP00000278616 |
| ENSP00000233146 | ENSP00000284719 |
| ENSP00000233146 | ENSP00000285021 |
| ENSP00000233146 | ENSP00000285398 |
| ENSP00000233146 | ENSP00000286428 |
| ENSP00000233146 | ENSP00000287647 |
| ENSP00000233146 | ENSP00000288985 |
| ENSP00000233146 | ENSP00000294008 |
| ENSP00000233146 | ENSP00000297316 |
| ENSP00000233146 | ENSP00000299767 |
| ENSP00000233146 | ENSP00000301764 |
| ENSP00000233146 | ENSP00000302111 |
| ENSP00000233146 | ENSP00000303515 |
| ENSP00000233146 | ENSP00000305790 |
| ENSP00000233146 | ENSP00000306561 |
| ENSP00000233146 | ENSP00000307853 |
| ENSP00000233146 | ENSP00000310520 |
| ENSP00000233146 | ENSP00000311873 |
| ENSP00000233146 | ENSP00000317904 |
| ENSP00000233146 | ENSP00000318977 |
| ENSP00000233146 | ENSP00000321636 |

|                 |                 |
|-----------------|-----------------|
| ENSP00000233146 | ENSP00000322570 |
| ENSP00000233146 | ENSP00000323099 |
| ENSP00000233146 | ENSP00000323858 |
| ENSP00000233146 | ENSP00000325863 |
| ENSP00000233146 | ENSP00000329466 |
| ENSP00000233146 | ENSP00000334061 |
| ENSP00000233146 | ENSP00000334675 |
| ENSP00000233146 | ENSP00000336856 |
| ENSP00000233146 | ENSP00000337127 |
| ENSP00000233146 | ENSP00000337353 |
| ENSP00000233146 | ENSP00000339495 |
| ENSP00000233146 | ENSP00000341243 |
| ENSP00000233146 | ENSP00000342889 |
| ENSP00000233146 | ENSP00000343392 |
| ENSP00000233146 | ENSP00000343741 |
| ENSP00000233146 | ENSP00000343745 |
| ENSP00000233146 | ENSP00000344741 |
| ENSP00000233146 | ENSP00000347232 |
| ENSP00000233146 | ENSP00000347978 |
| ENSP00000233146 | ENSP00000348089 |
| ENSP00000233146 | ENSP00000350283 |
| ENSP00000233146 | ENSP00000350491 |
| ENSP00000233146 | ENSP00000350767 |
| ENSP00000233146 | ENSP00000351284 |
| ENSP00000233146 | ENSP00000351490 |
| ENSP00000233146 | ENSP00000351697 |
| ENSP00000233146 | ENSP00000351947 |
| ENSP00000233146 | ENSP00000352257 |
| ENSP00000233146 | ENSP00000353332 |
| ENSP00000233146 | ENSP00000355013 |
| ENSP00000233146 | ENSP00000355185 |
| ENSP00000233146 | ENSP00000355518 |
| ENSP00000233146 | ENSP00000355958 |
| ENSP00000233146 | ENSP00000357440 |
| ENSP00000233146 | ENSP00000358576 |
| ENSP00000233146 | ENSP00000359444 |
| ENSP00000233146 | ENSP00000359567 |
| ENSP00000233146 | ENSP00000360268 |
| ENSP00000233146 | ENSP00000360310 |
| ENSP00000233146 | ENSP00000360532 |
| ENSP00000233146 | ENSP00000361310 |
| ENSP00000233146 | ENSP00000363021 |
| ENSP00000233146 | ENSP00000364270 |
| ENSP00000233146 | ENSP00000364289 |
| ENSP00000233146 | ENSP00000367527 |
| ENSP00000233146 | ENSP00000368349 |

|                 |                 |
|-----------------|-----------------|
| ENSP00000233146 | ENSP00000368438 |
| ENSP00000233146 | ENSP00000368646 |
| ENSP00000233146 | ENSP00000369335 |
| ENSP00000233146 | ENSP00000369411 |
| ENSP00000233146 | ENSP00000372023 |
| ENSP00000233146 | ENSP00000373952 |
| ENSP00000233146 | ENSP00000375809 |
| ENSP00000233146 | ENSP00000380504 |
| ENSP00000233146 | ENSP00000383986 |
| ENSP00000233146 | ENSP00000406490 |
| ENSP00000233146 | ENSP00000418734 |
| ENSP00000233146 | ENSP00000420588 |
| ENSP00000233154 | ENSP00000233668 |
| ENSP00000233154 | ENSP00000250113 |
| ENSP00000233154 | ENSP00000258682 |
| ENSP00000233154 | ENSP00000261017 |
| ENSP00000233154 | ENSP00000261167 |
| ENSP00000233154 | ENSP00000262320 |
| ENSP00000233154 | ENSP00000264122 |
| ENSP00000233154 | ENSP00000267101 |
| ENSP00000233154 | ENSP00000271628 |
| ENSP00000233154 | ENSP00000274376 |
| ENSP00000233154 | ENSP00000294129 |
| ENSP00000233154 | ENSP00000302079 |
| ENSP00000233154 | ENSP00000310561 |
| ENSP00000233154 | ENSP00000313829 |
| ENSP00000233154 | ENSP00000315465 |
| ENSP00000233154 | ENSP00000316460 |
| ENSP00000233154 | ENSP00000317332 |
| ENSP00000233154 | ENSP00000320924 |
| ENSP00000233154 | ENSP00000337838 |
| ENSP00000233154 | ENSP00000339299 |
| ENSP00000233154 | ENSP00000341189 |
| ENSP00000233154 | ENSP00000352802 |
| ENSP00000233154 | ENSP00000354313 |
| ENSP00000233154 | ENSP00000354566 |
| ENSP00000233154 | ENSP00000356694 |
| ENSP00000233154 | ENSP00000359552 |
| ENSP00000233154 | ENSP00000365439 |
| ENSP00000233154 | ENSP00000365637 |
| ENSP00000233154 | ENSP00000365891 |
| ENSP00000233154 | ENSP00000368190 |
| ENSP00000233154 | ENSP00000384675 |
| ENSP00000233154 | ENSP00000391774 |
| ENSP00000233154 | ENSP00000394794 |
| ENSP00000233154 | ENSP00000399511 |

|                 |                 |
|-----------------|-----------------|
| ENSP00000233154 | ENSP00000401397 |
| ENSP00000233154 | ENSP00000406091 |
| ENSP00000233156 | ENSP00000361405 |
| ENSP00000233156 | ENSP00000364709 |
| ENSP00000233190 | ENSP00000233627 |
| ENSP00000233190 | ENSP00000237289 |
| ENSP00000233190 | ENSP00000251864 |
| ENSP00000233190 | ENSP00000252102 |
| ENSP00000233190 | ENSP00000263774 |
| ENSP00000233190 | ENSP00000264230 |
| ENSP00000233190 | ENSP00000268668 |
| ENSP00000233190 | ENSP00000292180 |
| ENSP00000233190 | ENSP00000301585 |
| ENSP00000233190 | ENSP00000313490 |
| ENSP00000233190 | ENSP00000315774 |
| ENSP00000233190 | ENSP00000322450 |
| ENSP00000233190 | ENSP00000322706 |
| ENSP00000233190 | ENSP00000327070 |
| ENSP00000233190 | ENSP00000327268 |
| ENSP00000233190 | ENSP00000329466 |
| ENSP00000233190 | ENSP00000356972 |
| ENSP00000233190 | ENSP00000371888 |
| ENSP00000233190 | ENSP00000378605 |
| ENSP00000233190 | ENSP00000386722 |
| ENSP00000233190 | ENSP00000394085 |
| ENSP00000233242 | ENSP00000243253 |
| ENSP00000233242 | ENSP00000263816 |
| ENSP00000233242 | ENSP00000265517 |
| ENSP00000233242 | ENSP00000282541 |
| ENSP00000233242 | ENSP00000286091 |
| ENSP00000233242 | ENSP00000296350 |
| ENSP00000233242 | ENSP00000297261 |
| ENSP00000233242 | ENSP00000299767 |
| ENSP00000233242 | ENSP00000314615 |
| ENSP00000233242 | ENSP00000332353 |
| ENSP00000233242 | ENSP00000336927 |
| ENSP00000233242 | ENSP00000363873 |
| ENSP00000233242 | ENSP00000367992 |
| ENSP00000233242 | ENSP00000368646 |
| ENSP00000233331 | ENSP00000233809 |
| ENSP00000233331 | ENSP00000243903 |
| ENSP00000233331 | ENSP00000262238 |
| ENSP00000233331 | ENSP00000297157 |
| ENSP00000233331 | ENSP00000336842 |
| ENSP00000233331 | ENSP00000349640 |
| ENSP00000233331 | ENSP00000355205 |

|                 |                 |
|-----------------|-----------------|
| ENSP00000233331 | ENSP00000366434 |
| ENSP00000233331 | ENSP00000384198 |
| ENSP00000233331 | ENSP00000391457 |
| ENSP00000233331 | ENSP00000400476 |
| ENSP00000233336 | ENSP00000261424 |
| ENSP00000233336 | ENSP00000280665 |
| ENSP00000233336 | ENSP00000298139 |
| ENSP00000233336 | ENSP00000313171 |
| ENSP00000233336 | ENSP00000320503 |
| ENSP00000233336 | ENSP00000347232 |
| ENSP00000233336 | ENSP00000352265 |
| ENSP00000233557 | ENSP00000262306 |
| ENSP00000233557 | ENSP00000284811 |
| ENSP00000233557 | ENSP00000300181 |
| ENSP00000233557 | ENSP00000348157 |
| ENSP00000233557 | ENSP00000397435 |
| ENSP00000233575 | ENSP00000244007 |
| ENSP00000233575 | ENSP00000263686 |
| ENSP00000233575 | ENSP00000263816 |
| ENSP00000233575 | ENSP00000300574 |
| ENSP00000233616 | ENSP00000239891 |
| ENSP00000233616 | ENSP00000250498 |
| ENSP00000233616 | ENSP00000254101 |
| ENSP00000233616 | ENSP00000259253 |
| ENSP00000233616 | ENSP00000261534 |
| ENSP00000233616 | ENSP00000262215 |
| ENSP00000233616 | ENSP00000264501 |
| ENSP00000233616 | ENSP00000264639 |
| ENSP00000233616 | ENSP00000270538 |
| ENSP00000233616 | ENSP00000278243 |
| ENSP00000233616 | ENSP00000286091 |
| ENSP00000233616 | ENSP00000299626 |
| ENSP00000233616 | ENSP00000300658 |
| ENSP00000233616 | ENSP00000310621 |
| ENSP00000233616 | ENSP00000313420 |
| ENSP00000233616 | ENSP00000319979 |
| ENSP00000233616 | ENSP00000326699 |
| ENSP00000233616 | ENSP00000331268 |
| ENSP00000233616 | ENSP00000337688 |
| ENSP00000233616 | ENSP00000340466 |
| ENSP00000233616 | ENSP00000345656 |
| ENSP00000233616 | ENSP00000346809 |
| ENSP00000233616 | ENSP00000349877 |
| ENSP00000233616 | ENSP00000352708 |
| ENSP00000233616 | ENSP00000354558 |
| ENSP00000233616 | ENSP00000356530 |

|                 |                 |
|-----------------|-----------------|
| ENSP00000233616 | ENSP00000357998 |
| ENSP00000233616 | ENSP00000371888 |
| ENSP00000233616 | ENSP00000379042 |
| ENSP00000233616 | ENSP00000401445 |
| ENSP00000233616 | ENSP00000402515 |
| ENSP00000233616 | ENSP00000415203 |
| ENSP00000233623 | ENSP00000249356 |
| ENSP00000233623 | ENSP00000260970 |
| ENSP00000233623 | ENSP00000262177 |
| ENSP00000233623 | ENSP00000285398 |
| ENSP00000233623 | ENSP00000294053 |
| ENSP00000233623 | ENSP00000344431 |
| ENSP00000233623 | ENSP00000358019 |
| ENSP00000233623 | ENSP00000371451 |
| ENSP00000233623 | ENSP00000404381 |
| ENSP00000233627 | ENSP00000252102 |
| ENSP00000233627 | ENSP00000260361 |
| ENSP00000233627 | ENSP00000263774 |
| ENSP00000233627 | ENSP00000266544 |
| ENSP00000233627 | ENSP00000283429 |
| ENSP00000233627 | ENSP00000286428 |
| ENSP00000233627 | ENSP00000315774 |
| ENSP00000233627 | ENSP00000322450 |
| ENSP00000233627 | ENSP00000327268 |
| ENSP00000233627 | ENSP00000330737 |
| ENSP00000233627 | ENSP00000345917 |
| ENSP00000233627 | ENSP00000354687 |
| ENSP00000233627 | ENSP00000356972 |
| ENSP00000233627 | ENSP00000363676 |
| ENSP00000233627 | ENSP00000392985 |
| ENSP00000233668 | ENSP00000244007 |
| ENSP00000233668 | ENSP00000274376 |
| ENSP00000233668 | ENSP00000327513 |
| ENSP00000233668 | ENSP00000340944 |
| ENSP00000233668 | ENSP00000347942 |
| ENSP00000233668 | ENSP00000348307 |
| ENSP00000233668 | ENSP00000358417 |
| ENSP00000233668 | ENSP00000381793 |
| ENSP00000233668 | ENSP00000401277 |
| ENSP00000233809 | ENSP00000302665 |
| ENSP00000233809 | ENSP00000312584 |
| ENSP00000233809 | ENSP00000355751 |
| ENSP00000233838 | ENSP00000357255 |
| ENSP00000233838 | ENSP00000364709 |
| ENSP00000233893 | ENSP00000269980 |
| ENSP00000233893 | ENSP00000272227 |



|                 |                 |
|-----------------|-----------------|
| ENSP00000233893 | ENSP00000299767 |
| ENSP00000233893 | ENSP00000304802 |
| ENSP00000233893 | ENSP00000305682 |
| ENSP00000233893 | ENSP00000305958 |
| ENSP00000233893 | ENSP00000318351 |
| ENSP00000233893 | ENSP00000323822 |
| ENSP00000233893 | ENSP00000340019 |
| ENSP00000233893 | ENSP00000340278 |
| ENSP00000233893 | ENSP00000342087 |
| ENSP00000233893 | ENSP00000351644 |
| ENSP00000233893 | ENSP00000356130 |
| ENSP00000233893 | ENSP00000367208 |
| ENSP00000233893 | ENSP00000368438 |
| ENSP00000233893 | ENSP00000379607 |
| ENSP00000233893 | ENSP00000387262 |
| ENSP00000233893 | ENSP00000394382 |
| ENSP00000233954 | ENSP00000370842 |
| ENSP00000233954 | ENSP00000376445 |
| ENSP00000234040 | ENSP00000236959 |
| ENSP00000234040 | ENSP00000246548 |
| ENSP00000234040 | ENSP00000248553 |
| ENSP00000234040 | ENSP00000249636 |
| ENSP00000234040 | ENSP00000254101 |
| ENSP00000234040 | ENSP00000254900 |
| ENSP00000234040 | ENSP00000261434 |
| ENSP00000234040 | ENSP00000262193 |
| ENSP00000234040 | ENSP00000262608 |
| ENSP00000234040 | ENSP00000264160 |
| ENSP00000234040 | ENSP00000264193 |
| ENSP00000234040 | ENSP00000264335 |
| ENSP00000234040 | ENSP00000264705 |
| ENSP00000234040 | ENSP00000294168 |
| ENSP00000234040 | ENSP00000306361 |
| ENSP00000234040 | ENSP00000307272 |
| ENSP00000234040 | ENSP00000317904 |
| ENSP00000234040 | ENSP00000328103 |
| ENSP00000234040 | ENSP00000331342 |
| ENSP00000234040 | ENSP00000338703 |
| ENSP00000234040 | ENSP00000340820 |
| ENSP00000234040 | ENSP00000344537 |
| ENSP00000234040 | ENSP00000346022 |
| ENSP00000234040 | ENSP00000347134 |
| ENSP00000234040 | ENSP00000348278 |
| ENSP00000234040 | ENSP00000348455 |
| ENSP00000234040 | ENSP00000349887 |
| ENSP00000234040 | ENSP00000354558 |

|                 |                 |
|-----------------|-----------------|
| ENSP00000234040 | ENSP00000357283 |
| ENSP00000234040 | ENSP00000361287 |
| ENSP00000234040 | ENSP00000361998 |
| ENSP00000234040 | ENSP00000366482 |
| ENSP00000234040 | ENSP00000369293 |
| ENSP00000234040 | ENSP00000369757 |
| ENSP00000234040 | ENSP00000369897 |
| ENSP00000234040 | ENSP00000370421 |
| ENSP00000234040 | ENSP00000370719 |
| ENSP00000234040 | ENSP00000379678 |
| ENSP00000234111 | ENSP00000244763 |
| ENSP00000234111 | ENSP00000262265 |
| ENSP00000234111 | ENSP00000280350 |
| ENSP00000234111 | ENSP00000298292 |
| ENSP00000234111 | ENSP00000319788 |
| ENSP00000234111 | ENSP00000325448 |
| ENSP00000234111 | ENSP00000341243 |
| ENSP00000234111 | ENSP00000357880 |
| ENSP00000234111 | ENSP00000366156 |
| ENSP00000234111 | ENSP00000377520 |
| ENSP00000234111 | ENSP00000381499 |
| ENSP00000234111 | ENSP00000385746 |
| ENSP00000234111 | ENSP00000393583 |
| ENSP00000234111 | ENSP00000401445 |
| ENSP00000234111 | ENSP00000419371 |
| ENSP00000234160 | ENSP00000251968 |
| ENSP00000234160 | ENSP00000260649 |
| ENSP00000234160 | ENSP00000262544 |
| ENSP00000234160 | ENSP00000264122 |
| ENSP00000234160 | ENSP00000265175 |
| ENSP00000234160 | ENSP00000284637 |
| ENSP00000234160 | ENSP00000290541 |
| ENSP00000234160 | ENSP00000300181 |
| ENSP00000234160 | ENSP00000305503 |
| ENSP00000234160 | ENSP00000310003 |
| ENSP00000234160 | ENSP00000327541 |
| ENSP00000234160 | ENSP00000329419 |
| ENSP00000234160 | ENSP00000330945 |
| ENSP00000234160 | ENSP00000336606 |
| ENSP00000234160 | ENSP00000341848 |
| ENSP00000234160 | ENSP00000344460 |
| ENSP00000234160 | ENSP00000357861 |
| ENSP00000234160 | ENSP00000362153 |
| ENSP00000234160 | ENSP00000379500 |
| ENSP00000234160 | ENSP00000380793 |
| ENSP00000234160 | ENSP00000387477 |

|                 |                 |
|-----------------|-----------------|
| ENSP00000234160 | ENSP00000410833 |
| ENSP00000234160 | ENSP00000416097 |
| ENSP00000234160 | ENSP00000420405 |
| ENSP00000234170 | ENSP00000236051 |
| ENSP00000234170 | ENSP00000238789 |
| ENSP00000234170 | ENSP00000240055 |
| ENSP00000234170 | ENSP00000245121 |
| ENSP00000234170 | ENSP00000248633 |
| ENSP00000234170 | ENSP00000252115 |
| ENSP00000234170 | ENSP00000253107 |
| ENSP00000234170 | ENSP00000253329 |
| ENSP00000234170 | ENSP00000253363 |
| ENSP00000234170 | ENSP00000254037 |
| ENSP00000234170 | ENSP00000254940 |
| ENSP00000234170 | ENSP00000261015 |
| ENSP00000234170 | ENSP00000261637 |
| ENSP00000234170 | ENSP00000261741 |
| ENSP00000234170 | ENSP00000262056 |
| ENSP00000234170 | ENSP00000263278 |
| ENSP00000234170 | ENSP00000263629 |
| ENSP00000234170 | ENSP00000263795 |
| ENSP00000234170 | ENSP00000264065 |
| ENSP00000234170 | ENSP00000264230 |
| ENSP00000234170 | ENSP00000264670 |
| ENSP00000234170 | ENSP00000264951 |
| ENSP00000234170 | ENSP00000264995 |
| ENSP00000234170 | ENSP00000265245 |
| ENSP00000234170 | ENSP00000266529 |
| ENSP00000234170 | ENSP00000267425 |
| ENSP00000234170 | ENSP00000268616 |
| ENSP00000234170 | ENSP00000268661 |
| ENSP00000234170 | ENSP00000269499 |
| ENSP00000234170 | ENSP00000274242 |
| ENSP00000234170 | ENSP00000274606 |
| ENSP00000234170 | ENSP00000278856 |
| ENSP00000234170 | ENSP00000284000 |
| ENSP00000234170 | ENSP00000289371 |
| ENSP00000234170 | ENSP00000298292 |
| ENSP00000234170 | ENSP00000298746 |
| ENSP00000234170 | ENSP00000302886 |
| ENSP00000234170 | ENSP00000303511 |
| ENSP00000234170 | ENSP00000305702 |
| ENSP00000234170 | ENSP00000306548 |
| ENSP00000234170 | ENSP00000309334 |
| ENSP00000234170 | ENSP00000310042 |
| ENSP00000234170 | ENSP00000314311 |

|                 |                 |
|-----------------|-----------------|
| ENSP00000234170 | ENSP00000314348 |
| ENSP00000234170 | ENSP00000317992 |
| ENSP00000234170 | ENSP00000318195 |
| ENSP00000234170 | ENSP00000318604 |
| ENSP00000234170 | ENSP00000320885 |
| ENSP00000234170 | ENSP00000322419 |
| ENSP00000234170 | ENSP00000323424 |
| ENSP00000234170 | ENSP00000323858 |
| ENSP00000234170 | ENSP00000324122 |
| ENSP00000234170 | ENSP00000326806 |
| ENSP00000234170 | ENSP00000328690 |
| ENSP00000234170 | ENSP00000328854 |
| ENSP00000234170 | ENSP00000329466 |
| ENSP00000234170 | ENSP00000331817 |
| ENSP00000234170 | ENSP00000332171 |
| ENSP00000234170 | ENSP00000332340 |
| ENSP00000234170 | ENSP00000333836 |
| ENSP00000234170 | ENSP00000337839 |
| ENSP00000234170 | ENSP00000338573 |
| ENSP00000234170 | ENSP00000338862 |
| ENSP00000234170 | ENSP00000339145 |
| ENSP00000234170 | ENSP00000339795 |
| ENSP00000234170 | ENSP00000340434 |
| ENSP00000234170 | ENSP00000346037 |
| ENSP00000234170 | ENSP00000346120 |
| ENSP00000234170 | ENSP00000346236 |
| ENSP00000234170 | ENSP00000346725 |
| ENSP00000234170 | ENSP00000351596 |
| ENSP00000234170 | ENSP00000352678 |
| ENSP00000234170 | ENSP00000352738 |
| ENSP00000234170 | ENSP00000353098 |
| ENSP00000234170 | ENSP00000354040 |
| ENSP00000234170 | ENSP00000355541 |
| ENSP00000234170 | ENSP00000358563 |
| ENSP00000234170 | ENSP00000358716 |
| ENSP00000234170 | ENSP00000358812 |
| ENSP00000234170 | ENSP00000359345 |
| ENSP00000234170 | ENSP00000359688 |
| ENSP00000234170 | ENSP00000359939 |
| ENSP00000234170 | ENSP00000360031 |
| ENSP00000234170 | ENSP00000360412 |
| ENSP00000234170 | ENSP00000360828 |
| ENSP00000234170 | ENSP00000361010 |
| ENSP00000234170 | ENSP00000361076 |
| ENSP00000234170 | ENSP00000361232 |
| ENSP00000234170 | ENSP00000361982 |

|                 |                 |
|-----------------|-----------------|
| ENSP00000234170 | ENSP00000362153 |
| ENSP00000234170 | ENSP00000363559 |
| ENSP00000234170 | ENSP00000364543 |
| ENSP00000234170 | ENSP00000365806 |
| ENSP00000234170 | ENSP00000366179 |
| ENSP00000234170 | ENSP00000366519 |
| ENSP00000234170 | ENSP00000366557 |
| ENSP00000234170 | ENSP00000367439 |
| ENSP00000234170 | ENSP00000370589 |
| ENSP00000234170 | ENSP00000371201 |
| ENSP00000234170 | ENSP00000371451 |
| ENSP00000234170 | ENSP00000372199 |
| ENSP00000234170 | ENSP00000372827 |
| ENSP00000234170 | ENSP00000373090 |
| ENSP00000234170 | ENSP00000373715 |
| ENSP00000234170 | ENSP00000374390 |
| ENSP00000234170 | ENSP00000375730 |
| ENSP00000234170 | ENSP00000376307 |
| ENSP00000234170 | ENSP00000376309 |
| ENSP00000234170 | ENSP00000377344 |
| ENSP00000234170 | ENSP00000380495 |
| ENSP00000234170 | ENSP00000380982 |
| ENSP00000234170 | ENSP00000381045 |
| ENSP00000234170 | ENSP00000381293 |
| ENSP00000234170 | ENSP00000382392 |
| ENSP00000234170 | ENSP00000387347 |
| ENSP00000234170 | ENSP00000388464 |
| ENSP00000234170 | ENSP00000394290 |
| ENSP00000234170 | ENSP00000394400 |
| ENSP00000234170 | ENSP00000398597 |
| ENSP00000234170 | ENSP00000399530 |
| ENSP00000234170 | ENSP00000400626 |
| ENSP00000234170 | ENSP00000401371 |
| ENSP00000234170 | ENSP00000402338 |
| ENSP00000234170 | ENSP00000403576 |
| ENSP00000234170 | ENSP00000409074 |
| ENSP00000234170 | ENSP00000409367 |
| ENSP00000234170 | ENSP00000411162 |
| ENSP00000234170 | ENSP00000412310 |
| ENSP00000234170 | ENSP00000416959 |
| ENSP00000234170 | ENSP00000419740 |
| ENSP00000234198 | ENSP00000269385 |
| ENSP00000234198 | ENSP00000337163 |
| ENSP00000234198 | ENSP00000352257 |
| ENSP00000234198 | ENSP00000354478 |
| ENSP00000234198 | ENSP00000364847 |

|                 |                 |
|-----------------|-----------------|
| ENSP00000234198 | ENSP00000372170 |
| ENSP00000234198 | ENSP00000399968 |
| ENSP00000234198 | ENSP00000408792 |
| ENSP00000234296 | ENSP00000234626 |
| ENSP00000234296 | ENSP00000240055 |
| ENSP00000234296 | ENSP00000245960 |
| ENSP00000234296 | ENSP00000246548 |
| ENSP00000234296 | ENSP00000251038 |
| ENSP00000234296 | ENSP00000251289 |
| ENSP00000234296 | ENSP00000254719 |
| ENSP00000234296 | ENSP00000254942 |
| ENSP00000234296 | ENSP00000255465 |
| ENSP00000234296 | ENSP00000256442 |
| ENSP00000234296 | ENSP00000257789 |
| ENSP00000234296 | ENSP00000259008 |
| ENSP00000234296 | ENSP00000261424 |
| ENSP00000234296 | ENSP00000261531 |
| ENSP00000234296 | ENSP00000261881 |
| ENSP00000234296 | ENSP00000262144 |
| ENSP00000234296 | ENSP00000262315 |
| ENSP00000234296 | ENSP00000263201 |
| ENSP00000234296 | ENSP00000264108 |
| ENSP00000234296 | ENSP00000264169 |
| ENSP00000234296 | ENSP00000264335 |
| ENSP00000234296 | ENSP00000264926 |
| ENSP00000234296 | ENSP00000265056 |
| ENSP00000234296 | ENSP00000265465 |
| ENSP00000234296 | ENSP00000265728 |
| ENSP00000234296 | ENSP00000266070 |
| ENSP00000234296 | ENSP00000269127 |
| ENSP00000234296 | ENSP00000269468 |
| ENSP00000234296 | ENSP00000270861 |
| ENSP00000234296 | ENSP00000274289 |
| ENSP00000234296 | ENSP00000276603 |
| ENSP00000234296 | ENSP00000282058 |
| ENSP00000234296 | ENSP00000288976 |
| ENSP00000234296 | ENSP00000290810 |
| ENSP00000234296 | ENSP00000295640 |
| ENSP00000234296 | ENSP00000296273 |
| ENSP00000234296 | ENSP00000296509 |
| ENSP00000234296 | ENSP00000296543 |
| ENSP00000234296 | ENSP00000296755 |
| ENSP00000234296 | ENSP00000297431 |
| ENSP00000234296 | ENSP00000298139 |
| ENSP00000234296 | ENSP00000300086 |
| ENSP00000234296 | ENSP00000300231 |

|                 |                 |
|-----------------|-----------------|
| ENSP00000234296 | ENSP00000300738 |
| ENSP00000234296 | ENSP00000301019 |
| ENSP00000234296 | ENSP00000307208 |
| ENSP00000234296 | ENSP00000308944 |
| ENSP00000234296 | ENSP00000313171 |
| ENSP00000234296 | ENSP00000313420 |
| ENSP00000234296 | ENSP00000317636 |
| ENSP00000234296 | ENSP00000322396 |
| ENSP00000234296 | ENSP00000327541 |
| ENSP00000234296 | ENSP00000328720 |
| ENSP00000234296 | ENSP00000329466 |
| ENSP00000234296 | ENSP00000335357 |
| ENSP00000234296 | ENSP00000336606 |
| ENSP00000234296 | ENSP00000336856 |
| ENSP00000234296 | ENSP00000336868 |
| ENSP00000234296 | ENSP00000338413 |
| ENSP00000234296 | ENSP00000340879 |
| ENSP00000234296 | ENSP00000343741 |
| ENSP00000234296 | ENSP00000346725 |
| ENSP00000234296 | ENSP00000347168 |
| ENSP00000234296 | ENSP00000347232 |
| ENSP00000234296 | ENSP00000348565 |
| ENSP00000234296 | ENSP00000350283 |
| ENSP00000234296 | ENSP00000350767 |
| ENSP00000234296 | ENSP00000351947 |
| ENSP00000234296 | ENSP00000352257 |
| ENSP00000234296 | ENSP00000353332 |
| ENSP00000234296 | ENSP00000353793 |
| ENSP00000234296 | ENSP00000354340 |
| ENSP00000234296 | ENSP00000354916 |
| ENSP00000234296 | ENSP00000355011 |
| ENSP00000234296 | ENSP00000355153 |
| ENSP00000234296 | ENSP00000360412 |
| ENSP00000234296 | ENSP00000360532 |
| ENSP00000234296 | ENSP00000360621 |
| ENSP00000234296 | ENSP00000362578 |
| ENSP00000234296 | ENSP00000362592 |
| ENSP00000234296 | ENSP00000363021 |
| ENSP00000234296 | ENSP00000366557 |
| ENSP00000234296 | ENSP00000366953 |
| ENSP00000234296 | ENSP00000366974 |
| ENSP00000234296 | ENSP00000367034 |
| ENSP00000234296 | ENSP00000367406 |
| ENSP00000234296 | ENSP00000369335 |
| ENSP00000234296 | ENSP00000369411 |
| ENSP00000234296 | ENSP00000369716 |

|                 |                 |
|-----------------|-----------------|
| ENSP00000234296 | ENSP00000370151 |
| ENSP00000234296 | ENSP00000371475 |
| ENSP00000234296 | ENSP00000375809 |
| ENSP00000234296 | ENSP00000377747 |
| ENSP00000234296 | ENSP00000382562 |
| ENSP00000234296 | ENSP00000387982 |
| ENSP00000234296 | ENSP00000390475 |
| ENSP00000234296 | ENSP00000392028 |
| ENSP00000234296 | ENSP00000402515 |
| ENSP00000234396 | ENSP00000236067 |
| ENSP00000234396 | ENSP00000249289 |
| ENSP00000234396 | ENSP00000251076 |
| ENSP00000234396 | ENSP00000252699 |
| ENSP00000234396 | ENSP00000253083 |
| ENSP00000234396 | ENSP00000253413 |
| ENSP00000234396 | ENSP00000261714 |
| ENSP00000234396 | ENSP00000262039 |
| ENSP00000234396 | ENSP00000262554 |
| ENSP00000234396 | ENSP00000262850 |
| ENSP00000234396 | ENSP00000263208 |
| ENSP00000234396 | ENSP00000264029 |
| ENSP00000234396 | ENSP00000269385 |
| ENSP00000234396 | ENSP00000269397 |
| ENSP00000234396 | ENSP00000272238 |
| ENSP00000234396 | ENSP00000277010 |
| ENSP00000234396 | ENSP00000282841 |
| ENSP00000234396 | ENSP00000284727 |
| ENSP00000234396 | ENSP00000290949 |
| ENSP00000234396 | ENSP00000295685 |
| ENSP00000234396 | ENSP00000303191 |
| ENSP00000234396 | ENSP00000307214 |
| ENSP00000234396 | ENSP00000308750 |
| ENSP00000234396 | ENSP00000322706 |
| ENSP00000234396 | ENSP00000329715 |
| ENSP00000234396 | ENSP00000330836 |
| ENSP00000234396 | ENSP00000333946 |
| ENSP00000234396 | ENSP00000336724 |
| ENSP00000234396 | ENSP00000337127 |
| ENSP00000234396 | ENSP00000344460 |
| ENSP00000234396 | ENSP00000349078 |
| ENSP00000234396 | ENSP00000352522 |
| ENSP00000234396 | ENSP00000356470 |
| ENSP00000234396 | ENSP00000358033 |
| ENSP00000234396 | ENSP00000360183 |
| ENSP00000234396 | ENSP00000363162 |
| ENSP00000234396 | ENSP00000365388 |



|                 |                 |
|-----------------|-----------------|
| ENSP00000234396 | ENSP00000369456 |
| ENSP00000234396 | ENSP00000371888 |
| ENSP00000234396 | ENSP00000379908 |
| ENSP00000234396 | ENSP00000384490 |
| ENSP00000234420 | ENSP00000242576 |
| ENSP00000234420 | ENSP00000251038 |
| ENSP00000234420 | ENSP00000254719 |
| ENSP00000234420 | ENSP00000256996 |
| ENSP00000234420 | ENSP00000258428 |
| ENSP00000234420 | ENSP00000259008 |
| ENSP00000234420 | ENSP00000260810 |
| ENSP00000234420 | ENSP00000260947 |
| ENSP00000234420 | ENSP00000261424 |
| ENSP00000234420 | ENSP00000261531 |
| ENSP00000234420 | ENSP00000262367 |
| ENSP00000234420 | ENSP00000263642 |
| ENSP00000234420 | ENSP00000263795 |
| ENSP00000234420 | ENSP00000264233 |
| ENSP00000234420 | ENSP00000265081 |
| ENSP00000234420 | ENSP00000265304 |
| ENSP00000234420 | ENSP00000265433 |
| ENSP00000234420 | ENSP00000265849 |
| ENSP00000234420 | ENSP00000267064 |
| ENSP00000234420 | ENSP00000267430 |
| ENSP00000234420 | ENSP00000268043 |
| ENSP00000234420 | ENSP00000268711 |
| ENSP00000234420 | ENSP00000276326 |
| ENSP00000234420 | ENSP00000278616 |
| ENSP00000234420 | ENSP00000284719 |
| ENSP00000234420 | ENSP00000285021 |
| ENSP00000234420 | ENSP00000285398 |
| ENSP00000234420 | ENSP00000301280 |
| ENSP00000234420 | ENSP00000306561 |
| ENSP00000234420 | ENSP00000307853 |
| ENSP00000234420 | ENSP00000308944 |
| ENSP00000234420 | ENSP00000310520 |
| ENSP00000234420 | ENSP00000311873 |
| ENSP00000234420 | ENSP00000312995 |
| ENSP00000234420 | ENSP00000313420 |
| ENSP00000234420 | ENSP00000321636 |
| ENSP00000234420 | ENSP00000322570 |
| ENSP00000234420 | ENSP00000325863 |
| ENSP00000234420 | ENSP00000329466 |
| ENSP00000234420 | ENSP00000331310 |
| ENSP00000234420 | ENSP00000337127 |
| ENSP00000234420 | ENSP00000341243 |

|                 |                 |
|-----------------|-----------------|
| ENSP00000234420 | ENSP00000343741 |
| ENSP00000234420 | ENSP00000343745 |
| ENSP00000234420 | ENSP00000345917 |
| ENSP00000234420 | ENSP00000346566 |
| ENSP00000234420 | ENSP00000347232 |
| ENSP00000234420 | ENSP00000348020 |
| ENSP00000234420 | ENSP00000349049 |
| ENSP00000234420 | ENSP00000350283 |
| ENSP00000234420 | ENSP00000351284 |
| ENSP00000234420 | ENSP00000351697 |
| ENSP00000234420 | ENSP00000351947 |
| ENSP00000234420 | ENSP00000352257 |
| ENSP00000234420 | ENSP00000355185 |
| ENSP00000234420 | ENSP00000355958 |
| ENSP00000234420 | ENSP00000358478 |
| ENSP00000234420 | ENSP00000358576 |
| ENSP00000234420 | ENSP00000360268 |
| ENSP00000234420 | ENSP00000360310 |
| ENSP00000234420 | ENSP00000360532 |
| ENSP00000234420 | ENSP00000361310 |
| ENSP00000234420 | ENSP00000363021 |
| ENSP00000234420 | ENSP00000363313 |
| ENSP00000234420 | ENSP00000364289 |
| ENSP00000234420 | ENSP00000367527 |
| ENSP00000234420 | ENSP00000368349 |
| ENSP00000234420 | ENSP00000368438 |
| ENSP00000234420 | ENSP00000368646 |
| ENSP00000234420 | ENSP00000369335 |
| ENSP00000234420 | ENSP00000372023 |
| ENSP00000234420 | ENSP00000375809 |
| ENSP00000234420 | ENSP00000379607 |
| ENSP00000234420 | ENSP00000380504 |
| ENSP00000234420 | ENSP00000392601 |
| ENSP00000234420 | ENSP00000406490 |
| ENSP00000234420 | ENSP00000418734 |
| ENSP00000234454 | ENSP00000264108 |
| ENSP00000234454 | ENSP00000311977 |
| ENSP00000234454 | ENSP00000359939 |
| ENSP00000234488 | ENSP00000349887 |
| ENSP00000234590 | ENSP00000240922 |
| ENSP00000234590 | ENSP00000251607 |
| ENSP00000234590 | ENSP00000251968 |
| ENSP00000234590 | ENSP00000259229 |
| ENSP00000234590 | ENSP00000262030 |
| ENSP00000234590 | ENSP00000262850 |
| ENSP00000234590 | ENSP00000264335 |

|                 |                 |
|-----------------|-----------------|
| ENSP00000234590 | ENSP00000268206 |
| ENSP00000234590 | ENSP00000270776 |
| ENSP00000234590 | ENSP00000272227 |
| ENSP00000234590 | ENSP00000276326 |
| ENSP00000234590 | ENSP00000296805 |
| ENSP00000234590 | ENSP00000297185 |
| ENSP00000234590 | ENSP00000301729 |
| ENSP00000234590 | ENSP00000305958 |
| ENSP00000234590 | ENSP00000307900 |
| ENSP00000234590 | ENSP00000318131 |
| ENSP00000234590 | ENSP00000325448 |
| ENSP00000234590 | ENSP00000327070 |
| ENSP00000234590 | ENSP00000336702 |
| ENSP00000234590 | ENSP00000337127 |
| ENSP00000234590 | ENSP00000338703 |
| ENSP00000234590 | ENSP00000343557 |
| ENSP00000234590 | ENSP00000343885 |
| ENSP00000234590 | ENSP00000344460 |
| ENSP00000234590 | ENSP00000349577 |
| ENSP00000234590 | ENSP00000351284 |
| ENSP00000234590 | ENSP00000352708 |
| ENSP00000234590 | ENSP00000356290 |
| ENSP00000234590 | ENSP00000361686 |
| ENSP00000234590 | ENSP00000362334 |
| ENSP00000234590 | ENSP00000362413 |
| ENSP00000234590 | ENSP00000362824 |
| ENSP00000234590 | ENSP00000368438 |
| ENSP00000234590 | ENSP00000368699 |
| ENSP00000234590 | ENSP00000369257 |
| ENSP00000234590 | ENSP00000370376 |
| ENSP00000234590 | ENSP00000373952 |
| ENSP00000234590 | ENSP00000379607 |
| ENSP00000234590 | ENSP00000379933 |
| ENSP00000234590 | ENSP00000384523 |
| ENSP00000234590 | ENSP00000393953 |
| ENSP00000234590 | ENSP00000394071 |
| ENSP00000234590 | ENSP00000417763 |
| ENSP00000234626 | ENSP00000244741 |
| ENSP00000234626 | ENSP00000245960 |
| ENSP00000234626 | ENSP00000246062 |
| ENSP00000234626 | ENSP00000253003 |
| ENSP00000234626 | ENSP00000253462 |
| ENSP00000234626 | ENSP00000256442 |
| ENSP00000234626 | ENSP00000257789 |
| ENSP00000234626 | ENSP00000258418 |
| ENSP00000234626 | ENSP00000259750 |

|                 |                 |
|-----------------|-----------------|
| ENSP00000234626 | ENSP00000260810 |
| ENSP00000234626 | ENSP00000261845 |
| ENSP00000234626 | ENSP00000261881 |
| ENSP00000234626 | ENSP00000262315 |
| ENSP00000234626 | ENSP00000262319 |
| ENSP00000234626 | ENSP00000262519 |
| ENSP00000234626 | ENSP00000263201 |
| ENSP00000234626 | ENSP00000264926 |
| ENSP00000234626 | ENSP00000265056 |
| ENSP00000234626 | ENSP00000265140 |
| ENSP00000234626 | ENSP00000265728 |
| ENSP00000234626 | ENSP00000267197 |
| ENSP00000234626 | ENSP00000269214 |
| ENSP00000234626 | ENSP00000270861 |
| ENSP00000234626 | ENSP00000274289 |
| ENSP00000234626 | ENSP00000276014 |
| ENSP00000234626 | ENSP00000296509 |
| ENSP00000234626 | ENSP00000297338 |
| ENSP00000234626 | ENSP00000297431 |
| ENSP00000234626 | ENSP00000298139 |
| ENSP00000234626 | ENSP00000298852 |
| ENSP00000234626 | ENSP00000301280 |
| ENSP00000234626 | ENSP00000302478 |
| ENSP00000234626 | ENSP00000306999 |
| ENSP00000234626 | ENSP00000308699 |
| ENSP00000234626 | ENSP00000308944 |
| ENSP00000234626 | ENSP00000309474 |
| ENSP00000234626 | ENSP00000310129 |
| ENSP00000234626 | ENSP00000311005 |
| ENSP00000234626 | ENSP00000312995 |
| ENSP00000234626 | ENSP00000313432 |
| ENSP00000234626 | ENSP00000317334 |
| ENSP00000234626 | ENSP00000317636 |
| ENSP00000234626 | ENSP00000321636 |
| ENSP00000234626 | ENSP00000322180 |
| ENSP00000234626 | ENSP00000323663 |
| ENSP00000234626 | ENSP00000328854 |
| ENSP00000234626 | ENSP00000329419 |
| ENSP00000234626 | ENSP00000331268 |
| ENSP00000234626 | ENSP00000336868 |
| ENSP00000234626 | ENSP00000340879 |
| ENSP00000234626 | ENSP00000342381 |
| ENSP00000234626 | ENSP00000343190 |
| ENSP00000234626 | ENSP00000343741 |
| ENSP00000234626 | ENSP00000347168 |
| ENSP00000234626 | ENSP00000347232 |

|                 |                 |
|-----------------|-----------------|
| ENSP00000234626 | ENSP00000350767 |
| ENSP00000234626 | ENSP00000351284 |
| ENSP00000234626 | ENSP00000351697 |
| ENSP00000234626 | ENSP00000353793 |
| ENSP00000234626 | ENSP00000354347 |
| ENSP00000234626 | ENSP00000355153 |
| ENSP00000234626 | ENSP00000355388 |
| ENSP00000234626 | ENSP00000358478 |
| ENSP00000234626 | ENSP00000360621 |
| ENSP00000234626 | ENSP00000361310 |
| ENSP00000234626 | ENSP00000366974 |
| ENSP00000234626 | ENSP00000367034 |
| ENSP00000234626 | ENSP00000368349 |
| ENSP00000234626 | ENSP00000368438 |
| ENSP00000234626 | ENSP00000369335 |
| ENSP00000234626 | ENSP00000370151 |
| ENSP00000234626 | ENSP00000371475 |
| ENSP00000234626 | ENSP00000372023 |
| ENSP00000234626 | ENSP00000376946 |
| ENSP00000234626 | ENSP00000381565 |
| ENSP00000234626 | ENSP00000384048 |
| ENSP00000234626 | ENSP00000402515 |
| ENSP00000234626 | ENSP00000413632 |
| ENSP00000234677 | ENSP00000235521 |
| ENSP00000234677 | ENSP00000240185 |
| ENSP00000234677 | ENSP00000249923 |
| ENSP00000234677 | ENSP00000251038 |
| ENSP00000234677 | ENSP00000256854 |
| ENSP00000234677 | ENSP00000258499 |
| ENSP00000234677 | ENSP00000259154 |
| ENSP00000234677 | ENSP00000264161 |
| ENSP00000234677 | ENSP00000264705 |
| ENSP00000234677 | ENSP00000267415 |
| ENSP00000234677 | ENSP00000270223 |
| ENSP00000234677 | ENSP00000276603 |
| ENSP00000234677 | ENSP00000301585 |
| ENSP00000234677 | ENSP00000304592 |
| ENSP00000234677 | ENSP00000311766 |
| ENSP00000234677 | ENSP00000322016 |
| ENSP00000234677 | ENSP00000325448 |
| ENSP00000234677 | ENSP00000340019 |
| ENSP00000234677 | ENSP00000341243 |
| ENSP00000234677 | ENSP00000347495 |
| ENSP00000234677 | ENSP00000348565 |
| ENSP00000234677 | ENSP00000350249 |
| ENSP00000234677 | ENSP00000354347 |

|                 |                 |
|-----------------|-----------------|
| ENSP00000234677 | ENSP00000355890 |
| ENSP00000234677 | ENSP00000358563 |
| ENSP00000234677 | ENSP00000362807 |
| ENSP00000234677 | ENSP00000363205 |
| ENSP00000234677 | ENSP00000367923 |
| ENSP00000234677 | ENSP00000369335 |
| ENSP00000234677 | ENSP00000370883 |
| ENSP00000234677 | ENSP00000377914 |
| ENSP00000234800 | ENSP00000311134 |
| ENSP00000234827 | ENSP00000247970 |
| ENSP00000234827 | ENSP00000252445 |
| ENSP00000234827 | ENSP00000256854 |
| ENSP00000234827 | ENSP00000262518 |
| ENSP00000234827 | ENSP00000264515 |
| ENSP00000234827 | ENSP00000265073 |
| ENSP00000234827 | ENSP00000283882 |
| ENSP00000234827 | ENSP00000295066 |
| ENSP00000234827 | ENSP00000302160 |
| ENSP00000234827 | ENSP00000304593 |
| ENSP00000234827 | ENSP00000325677 |
| ENSP00000234827 | ENSP00000334188 |
| ENSP00000234827 | ENSP00000354977 |
| ENSP00000234827 | ENSP00000357887 |
| ENSP00000234827 | ENSP00000360116 |
| ENSP00000234827 | ENSP00000366135 |
| ENSP00000234827 | ENSP00000370968 |
| ENSP00000234827 | ENSP00000374213 |
| ENSP00000234827 | ENSP00000386134 |
| ENSP00000234827 | ENSP00000386759 |
| ENSP00000235090 | ENSP00000238112 |
| ENSP00000235090 | ENSP00000244520 |
| ENSP00000235090 | ENSP00000245934 |
| ENSP00000235090 | ENSP00000253048 |
| ENSP00000235090 | ENSP00000256429 |
| ENSP00000235090 | ENSP00000261531 |
| ENSP00000235090 | ENSP00000261600 |
| ENSP00000235090 | ENSP00000264515 |
| ENSP00000235090 | ENSP00000266735 |
| ENSP00000235090 | ENSP00000271628 |
| ENSP00000235090 | ENSP00000286307 |
| ENSP00000235090 | ENSP00000291386 |
| ENSP00000235090 | ENSP00000292476 |
| ENSP00000235090 | ENSP00000296490 |
| ENSP00000235090 | ENSP00000298281 |
| ENSP00000235090 | ENSP00000299543 |
| ENSP00000235090 | ENSP00000300413 |

|                 |                 |
|-----------------|-----------------|
| ENSP00000235090 | ENSP00000302160 |
| ENSP00000235090 | ENSP00000302530 |
| ENSP00000235090 | ENSP00000304327 |
| ENSP00000235090 | ENSP00000304704 |
| ENSP00000235090 | ENSP00000308466 |
| ENSP00000235090 | ENSP00000311677 |
| ENSP00000235090 | ENSP00000314348 |
| ENSP00000235090 | ENSP00000315791 |
| ENSP00000235090 | ENSP00000316578 |
| ENSP00000235090 | ENSP00000317872 |
| ENSP00000235090 | ENSP00000319169 |
| ENSP00000235090 | ENSP00000321320 |
| ENSP00000235090 | ENSP00000325376 |
| ENSP00000235090 | ENSP00000331369 |
| ENSP00000235090 | ENSP00000331817 |
| ENSP00000235090 | ENSP00000332444 |
| ENSP00000235090 | ENSP00000336752 |
| ENSP00000235090 | ENSP00000339145 |
| ENSP00000235090 | ENSP00000339353 |
| ENSP00000235090 | ENSP00000342374 |
| ENSP00000235090 | ENSP00000347592 |
| ENSP00000235090 | ENSP00000353246 |
| ENSP00000235090 | ENSP00000354951 |
| ENSP00000235090 | ENSP00000355050 |
| ENSP00000235090 | ENSP00000359727 |
| ENSP00000235090 | ENSP00000361162 |
| ENSP00000235090 | ENSP00000362306 |
| ENSP00000235090 | ENSP00000365735 |
| ENSP00000235090 | ENSP00000365747 |
| ENSP00000235090 | ENSP00000366607 |
| ENSP00000235090 | ENSP00000378165 |
| ENSP00000235090 | ENSP00000379607 |
| ENSP00000235090 | ENSP00000390475 |
| ENSP00000235090 | ENSP00000393275 |
| ENSP00000235090 | ENSP00000400591 |
| ENSP00000235090 | ENSP00000412566 |
| ENSP00000235090 | ENSP00000418734 |
| ENSP00000235310 | ENSP00000258428 |
| ENSP00000235310 | ENSP00000271526 |
| ENSP00000235310 | ENSP00000296509 |
| ENSP00000235310 | ENSP00000309968 |
| ENSP00000235310 | ENSP00000311368 |
| ENSP00000235310 | ENSP00000312753 |
| ENSP00000235310 | ENSP00000317872 |
| ENSP00000235310 | ENSP00000351697 |
| ENSP00000235310 | ENSP00000354730 |

|                 |                 |
|-----------------|-----------------|
| ENSP00000235310 | ENSP00000365175 |
| ENSP00000235310 | ENSP00000378529 |
| ENSP00000235310 | ENSP00000387477 |
| ENSP00000235310 | ENSP00000415363 |
| ENSP00000235329 | ENSP00000253083 |
| ENSP00000235329 | ENSP00000254442 |
| ENSP00000235329 | ENSP00000262715 |
| ENSP00000235329 | ENSP00000262854 |
| ENSP00000235329 | ENSP00000285873 |
| ENSP00000235329 | ENSP00000290299 |
| ENSP00000235329 | ENSP00000323377 |
| ENSP00000235329 | ENSP00000324404 |
| ENSP00000235329 | ENSP00000325421 |
| ENSP00000235329 | ENSP00000340093 |
| ENSP00000235329 | ENSP00000351813 |
| ENSP00000235329 | ENSP00000352820 |
| ENSP00000235329 | ENSP00000353059 |
| ENSP00000235329 | ENSP00000355865 |
| ENSP00000235329 | ENSP00000362344 |
| ENSP00000235329 | ENSP00000363591 |
| ENSP00000235329 | ENSP00000366482 |
| ENSP00000235329 | ENSP00000366953 |
| ENSP00000235329 | ENSP00000369335 |
| ENSP00000235329 | ENSP00000418667 |
| ENSP00000235332 | ENSP00000334061 |
| ENSP00000235332 | ENSP00000337396 |
| ENSP00000235345 | ENSP00000277541 |
| ENSP00000235345 | ENSP00000336724 |
| ENSP00000235345 | ENSP00000357494 |
| ENSP00000235372 | ENSP00000267163 |
| ENSP00000235372 | ENSP00000325120 |
| ENSP00000235521 | ENSP00000243563 |
| ENSP00000235521 | ENSP00000264705 |
| ENSP00000235521 | ENSP00000340019 |
| ENSP00000235521 | ENSP00000347495 |
| ENSP00000235933 | ENSP00000347948 |
| ENSP00000236051 | ENSP00000244496 |
| ENSP00000236051 | ENSP00000246802 |
| ENSP00000236051 | ENSP00000248673 |
| ENSP00000236051 | ENSP00000249636 |
| ENSP00000236051 | ENSP00000252115 |
| ENSP00000236051 | ENSP00000252622 |
| ENSP00000236051 | ENSP00000253107 |
| ENSP00000236051 | ENSP00000253108 |
| ENSP00000236051 | ENSP00000254037 |
| ENSP00000236051 | ENSP00000254940 |



|                 |                 |
|-----------------|-----------------|
| ENSP00000236051 | ENSP00000260102 |
| ENSP00000236051 | ENSP00000261015 |
| ENSP00000236051 | ENSP00000261531 |
| ENSP00000236051 | ENSP00000261741 |
| ENSP00000236051 | ENSP00000264230 |
| ENSP00000236051 | ENSP00000264670 |
| ENSP00000236051 | ENSP00000264995 |
| ENSP00000236051 | ENSP00000265245 |
| ENSP00000236051 | ENSP00000268616 |
| ENSP00000236051 | ENSP00000268661 |
| ENSP00000236051 | ENSP00000269499 |
| ENSP00000236051 | ENSP00000274606 |
| ENSP00000236051 | ENSP00000278856 |
| ENSP00000236051 | ENSP00000281708 |
| ENSP00000236051 | ENSP00000282388 |
| ENSP00000236051 | ENSP00000296411 |
| ENSP00000236051 | ENSP00000296755 |
| ENSP00000236051 | ENSP00000296802 |
| ENSP00000236051 | ENSP00000297325 |
| ENSP00000236051 | ENSP00000297990 |
| ENSP00000236051 | ENSP00000298746 |
| ENSP00000236051 | ENSP00000300231 |
| ENSP00000236051 | ENSP00000301962 |
| ENSP00000236051 | ENSP00000302886 |
| ENSP00000236051 | ENSP00000305702 |
| ENSP00000236051 | ENSP00000307889 |
| ENSP00000236051 | ENSP00000308944 |
| ENSP00000236051 | ENSP00000309334 |
| ENSP00000236051 | ENSP00000310590 |
| ENSP00000236051 | ENSP00000314348 |
| ENSP00000236051 | ENSP00000317992 |
| ENSP00000236051 | ENSP00000318195 |
| ENSP00000236051 | ENSP00000318374 |
| ENSP00000236051 | ENSP00000322016 |
| ENSP00000236051 | ENSP00000322396 |
| ENSP00000236051 | ENSP00000323858 |
| ENSP00000236051 | ENSP00000324792 |
| ENSP00000236051 | ENSP00000325312 |
| ENSP00000236051 | ENSP00000326806 |
| ENSP00000236051 | ENSP00000328690 |
| ENSP00000236051 | ENSP00000329466 |
| ENSP00000236051 | ENSP00000330343 |
| ENSP00000236051 | ENSP00000331817 |
| ENSP00000236051 | ENSP00000332340 |
| ENSP00000236051 | ENSP00000337839 |
| ENSP00000236051 | ENSP00000338573 |

|                 |                 |
|-----------------|-----------------|
| ENSP00000236051 | ENSP00000338862 |
| ENSP00000236051 | ENSP00000339145 |
| ENSP00000236051 | ENSP00000339795 |
| ENSP00000236051 | ENSP00000345917 |
| ENSP00000236051 | ENSP00000346015 |
| ENSP00000236051 | ENSP00000346120 |
| ENSP00000236051 | ENSP00000346725 |
| ENSP00000236051 | ENSP00000354040 |
| ENSP00000236051 | ENSP00000358478 |
| ENSP00000236051 | ENSP00000358563 |
| ENSP00000236051 | ENSP00000358812 |
| ENSP00000236051 | ENSP00000359345 |
| ENSP00000236051 | ENSP00000359688 |
| ENSP00000236051 | ENSP00000360031 |
| ENSP00000236051 | ENSP00000360412 |
| ENSP00000236051 | ENSP00000360828 |
| ENSP00000236051 | ENSP00000361076 |
| ENSP00000236051 | ENSP00000361092 |
| ENSP00000236051 | ENSP00000361232 |
| ENSP00000236051 | ENSP00000361982 |
| ENSP00000236051 | ENSP00000362153 |
| ENSP00000236051 | ENSP00000363391 |
| ENSP00000236051 | ENSP00000364320 |
| ENSP00000236051 | ENSP00000365806 |
| ENSP00000236051 | ENSP00000366519 |
| ENSP00000236051 | ENSP00000366557 |
| ENSP00000236051 | ENSP00000368887 |
| ENSP00000236051 | ENSP00000370589 |
| ENSP00000236051 | ENSP00000371201 |
| ENSP00000236051 | ENSP00000372199 |
| ENSP00000236051 | ENSP00000373090 |
| ENSP00000236051 | ENSP00000374390 |
| ENSP00000236051 | ENSP00000379607 |
| ENSP00000236051 | ENSP00000379888 |
| ENSP00000236051 | ENSP00000382392 |
| ENSP00000236051 | ENSP00000384015 |
| ENSP00000236051 | ENSP00000388464 |
| ENSP00000236051 | ENSP00000389103 |
| ENSP00000236051 | ENSP00000394290 |
| ENSP00000236051 | ENSP00000402338 |
| ENSP00000236051 | ENSP00000403576 |
| ENSP00000236051 | ENSP00000409074 |
| ENSP00000236051 | ENSP00000409367 |
| ENSP00000236051 | ENSP00000411162 |
| ENSP00000236051 | ENSP00000414321 |
| ENSP00000236051 | ENSP00000419740 |

|                 |                 |
|-----------------|-----------------|
| ENSP00000236067 | ENSP00000237530 |
| ENSP00000236067 | ENSP00000255108 |
| ENSP00000236067 | ENSP00000262030 |
| ENSP00000236067 | ENSP00000263083 |
| ENSP00000236067 | ENSP00000273398 |
| ENSP00000236067 | ENSP00000282050 |
| ENSP00000236067 | ENSP00000290299 |
| ENSP00000236067 | ENSP00000290541 |
| ENSP00000236067 | ENSP00000295702 |
| ENSP00000236067 | ENSP00000295890 |
| ENSP00000236067 | ENSP00000301587 |
| ENSP00000236067 | ENSP00000311028 |
| ENSP00000236067 | ENSP00000314348 |
| ENSP00000236067 | ENSP00000332247 |
| ENSP00000236067 | ENSP00000332681 |
| ENSP00000236067 | ENSP00000333873 |
| ENSP00000236067 | ENSP00000337053 |
| ENSP00000236067 | ENSP00000343885 |
| ENSP00000236067 | ENSP00000345096 |
| ENSP00000236067 | ENSP00000347134 |
| ENSP00000236067 | ENSP00000347979 |
| ENSP00000236067 | ENSP00000349142 |
| ENSP00000236067 | ENSP00000352522 |
| ENSP00000236067 | ENSP00000354632 |
| ENSP00000236067 | ENSP00000358737 |
| ENSP00000236067 | ENSP00000361057 |
| ENSP00000236067 | ENSP00000362334 |
| ENSP00000236067 | ENSP00000363162 |
| ENSP00000236067 | ENSP00000365943 |
| ENSP00000236067 | ENSP00000370719 |
| ENSP00000236067 | ENSP00000379093 |
| ENSP00000236067 | ENSP00000382767 |
| ENSP00000236192 | ENSP00000258301 |
| ENSP00000236192 | ENSP00000258654 |
| ENSP00000236192 | ENSP00000259400 |
| ENSP00000236192 | ENSP00000260818 |
| ENSP00000236192 | ENSP00000261173 |
| ENSP00000236192 | ENSP00000263897 |
| ENSP00000236192 | ENSP00000265857 |
| ENSP00000236192 | ENSP00000272322 |
| ENSP00000236192 | ENSP00000286448 |
| ENSP00000236192 | ENSP00000294179 |
| ENSP00000236192 | ENSP00000305255 |
| ENSP00000236192 | ENSP00000309457 |
| ENSP00000236192 | ENSP00000310521 |
| ENSP00000236192 | ENSP00000314615 |

|                 |                 |
|-----------------|-----------------|
| ENSP00000236192 | ENSP00000316454 |
| ENSP00000236192 | ENSP00000317714 |
| ENSP00000236192 | ENSP00000320885 |
| ENSP00000236192 | ENSP00000323377 |
| ENSP00000236192 | ENSP00000324628 |
| ENSP00000236192 | ENSP00000325002 |
| ENSP00000236192 | ENSP00000326534 |
| ENSP00000236192 | ENSP00000327650 |
| ENSP00000236192 | ENSP00000337501 |
| ENSP00000236192 | ENSP00000344055 |
| ENSP00000236192 | ENSP00000349887 |
| ENSP00000236192 | ENSP00000353073 |
| ENSP00000236192 | ENSP00000356405 |
| ENSP00000236192 | ENSP00000357887 |
| ENSP00000236192 | ENSP00000360183 |
| ENSP00000236192 | ENSP00000363349 |
| ENSP00000236192 | ENSP00000369810 |
| ENSP00000236192 | ENSP00000373215 |
| ENSP00000236192 | ENSP00000376268 |
| ENSP00000236192 | ENSP00000378368 |
| ENSP00000236192 | ENSP00000381293 |
| ENSP00000236192 | ENSP00000389934 |
| ENSP00000236192 | ENSP00000390783 |
| ENSP00000236192 | ENSP00000397441 |
| ENSP00000236192 | ENSP00000417748 |
| ENSP00000236192 | ENSP00000418661 |
| ENSP00000236273 | ENSP00000243563 |
| ENSP00000236273 | ENSP00000251038 |
| ENSP00000236273 | ENSP00000252622 |
| ENSP00000236273 | ENSP00000254193 |
| ENSP00000236273 | ENSP00000260210 |
| ENSP00000236273 | ENSP00000262056 |
| ENSP00000236273 | ENSP00000265753 |
| ENSP00000236273 | ENSP00000266529 |
| ENSP00000236273 | ENSP00000268482 |
| ENSP00000236273 | ENSP00000297151 |
| ENSP00000236273 | ENSP00000298532 |
| ENSP00000236273 | ENSP00000300213 |
| ENSP00000236273 | ENSP00000300648 |
| ENSP00000236273 | ENSP00000301740 |
| ENSP00000236273 | ENSP00000303191 |
| ENSP00000236273 | ENSP00000303712 |
| ENSP00000236273 | ENSP00000304370 |
| ENSP00000236273 | ENSP00000314311 |
| ENSP00000236273 | ENSP00000314792 |
| ENSP00000236273 | ENSP00000326806 |

|                 |                 |
|-----------------|-----------------|
| ENSP00000236273 | ENSP00000331907 |
| ENSP00000236273 | ENSP00000332103 |
| ENSP00000236273 | ENSP00000334148 |
| ENSP00000236273 | ENSP00000334188 |
| ENSP00000236273 | ENSP00000339090 |
| ENSP00000236273 | ENSP00000343557 |
| ENSP00000236273 | ENSP00000351137 |
| ENSP00000236273 | ENSP00000351492 |
| ENSP00000236273 | ENSP00000360532 |
| ENSP00000236273 | ENSP00000361577 |
| ENSP00000236273 | ENSP00000362936 |
| ENSP00000236273 | ENSP00000366557 |
| ENSP00000236273 | ENSP00000367835 |
| ENSP00000236273 | ENSP00000376309 |
| ENSP00000236273 | ENSP00000376973 |
| ENSP00000236273 | ENSP00000384573 |
| ENSP00000236273 | ENSP00000412566 |
| ENSP00000236273 | ENSP00000416959 |
| ENSP00000236273 | ENSP00000417451 |
| ENSP00000236273 | ENSP00000420195 |
| ENSP00000236959 | ENSP00000243563 |
| ENSP00000236959 | ENSP00000248566 |
| ENSP00000236959 | ENSP00000251303 |
| ENSP00000236959 | ENSP00000253462 |
| ENSP00000236959 | ENSP00000260361 |
| ENSP00000236959 | ENSP00000260598 |
| ENSP00000236959 | ENSP00000264220 |
| ENSP00000236959 | ENSP00000264335 |
| ENSP00000236959 | ENSP00000282441 |
| ENSP00000236959 | ENSP00000286621 |
| ENSP00000236959 | ENSP00000287878 |
| ENSP00000236959 | ENSP00000288532 |
| ENSP00000236959 | ENSP00000296658 |
| ENSP00000236959 | ENSP00000300738 |
| ENSP00000236959 | ENSP00000306817 |
| ENSP00000236959 | ENSP00000311876 |
| ENSP00000236959 | ENSP00000328940 |
| ENSP00000236959 | ENSP00000329466 |
| ENSP00000236959 | ENSP00000330918 |
| ENSP00000236959 | ENSP00000337358 |
| ENSP00000236959 | ENSP00000345096 |
| ENSP00000236959 | ENSP00000352673 |
| ENSP00000236959 | ENSP00000355518 |
| ENSP00000236959 | ENSP00000360286 |
| ENSP00000236959 | ENSP00000360316 |
| ENSP00000236959 | ENSP00000361699 |

|                 |                 |
|-----------------|-----------------|
| ENSP00000236959 | ENSP00000361965 |
| ENSP00000236959 | ENSP00000363384 |
| ENSP00000236959 | ENSP00000365775 |
| ENSP00000236959 | ENSP00000365891 |
| ENSP00000236959 | ENSP00000366620 |
| ENSP00000236959 | ENSP00000369897 |
| ENSP00000236959 | ENSP00000382492 |
| ENSP00000236959 | ENSP00000382595 |
| ENSP00000236959 | ENSP00000400806 |
| ENSP00000236980 | ENSP00000301585 |
| ENSP00000237014 | ENSP00000263816 |
| ENSP00000237014 | ENSP00000265857 |
| ENSP00000237014 | ENSP00000284981 |
| ENSP00000237014 | ENSP00000295897 |
| ENSP00000237014 | ENSP00000307134 |
| ENSP00000237014 | ENSP00000336790 |
| ENSP00000237014 | ENSP00000360519 |
| ENSP00000237014 | ENSP00000363779 |
| ENSP00000237014 | ENSP00000363827 |
| ENSP00000237014 | ENSP00000364217 |
| ENSP00000237014 | ENSP00000401397 |
| ENSP00000237014 | ENSP00000416097 |
| ENSP00000237281 | ENSP00000257430 |
| ENSP00000237281 | ENSP00000281043 |
| ENSP00000237281 | ENSP00000281708 |
| ENSP00000237281 | ENSP00000304102 |
| ENSP00000237281 | ENSP00000306788 |
| ENSP00000237281 | ENSP00000320648 |
| ENSP00000237281 | ENSP00000341551 |
| ENSP00000237283 | ENSP00000251038 |
| ENSP00000237283 | ENSP00000252622 |
| ENSP00000237283 | ENSP00000273962 |
| ENSP00000237283 | ENSP00000282388 |
| ENSP00000237283 | ENSP00000294053 |
| ENSP00000237283 | ENSP00000298317 |
| ENSP00000237283 | ENSP00000300648 |
| ENSP00000237283 | ENSP00000323288 |
| ENSP00000237283 | ENSP00000342374 |
| ENSP00000237283 | ENSP00000346155 |
| ENSP00000237283 | ENSP00000359531 |
| ENSP00000237283 | ENSP00000373331 |
| ENSP00000237289 | ENSP00000242719 |
| ENSP00000237289 | ENSP00000248244 |
| ENSP00000237289 | ENSP00000259808 |
| ENSP00000237289 | ENSP00000260731 |
| ENSP00000237289 | ENSP00000264335 |

|                 |                 |
|-----------------|-----------------|
| ENSP00000237289 | ENSP00000265651 |
| ENSP00000237289 | ENSP00000287218 |
| ENSP00000237289 | ENSP00000294507 |
| ENSP00000237289 | ENSP00000301838 |
| ENSP00000237289 | ENSP00000311344 |
| ENSP00000237289 | ENSP00000313059 |
| ENSP00000237289 | ENSP00000317891 |
| ENSP00000237289 | ENSP00000321203 |
| ENSP00000237289 | ENSP00000329411 |
| ENSP00000237289 | ENSP00000329967 |
| ENSP00000237289 | ENSP00000333298 |
| ENSP00000237289 | ENSP00000351908 |
| ENSP00000237289 | ENSP00000355231 |
| ENSP00000237289 | ENSP00000358997 |
| ENSP00000237289 | ENSP00000367498 |
| ENSP00000237289 | ENSP00000368824 |
| ENSP00000237289 | ENSP00000370737 |
| ENSP00000237289 | ENSP00000376250 |
| ENSP00000237289 | ENSP00000379612 |
| ENSP00000237380 | ENSP00000251871 |
| ENSP00000237380 | ENSP00000252597 |
| ENSP00000237380 | ENSP00000255764 |
| ENSP00000237380 | ENSP00000256379 |
| ENSP00000237380 | ENSP00000258648 |
| ENSP00000237380 | ENSP00000261884 |
| ENSP00000237380 | ENSP00000263205 |
| ENSP00000237380 | ENSP00000263390 |
| ENSP00000237380 | ENSP00000265350 |
| ENSP00000237380 | ENSP00000268711 |
| ENSP00000237380 | ENSP00000272645 |
| ENSP00000237380 | ENSP00000281928 |
| ENSP00000237380 | ENSP00000282007 |
| ENSP00000237380 | ENSP00000282441 |
| ENSP00000237380 | ENSP00000282892 |
| ENSP00000237380 | ENSP00000286317 |
| ENSP00000237380 | ENSP00000290663 |
| ENSP00000237380 | ENSP00000292035 |
| ENSP00000237380 | ENSP00000293777 |
| ENSP00000237380 | ENSP00000297347 |
| ENSP00000237380 | ENSP00000300651 |
| ENSP00000237380 | ENSP00000301788 |
| ENSP00000237380 | ENSP00000304604 |
| ENSP00000237380 | ENSP00000312735 |
| ENSP00000237380 | ENSP00000313169 |
| ENSP00000237380 | ENSP00000314949 |
| ENSP00000237380 | ENSP00000323720 |

|                 |                 |
|-----------------|-----------------|
| ENSP00000237380 | ENSP00000324124 |
| ENSP00000237380 | ENSP00000325612 |
| ENSP00000237380 | ENSP00000326767 |
| ENSP00000237380 | ENSP00000337340 |
| ENSP00000237380 | ENSP00000340836 |
| ENSP00000237380 | ENSP00000342343 |
| ENSP00000237380 | ENSP00000344666 |
| ENSP00000237380 | ENSP00000348215 |
| ENSP00000237380 | ENSP00000348610 |
| ENSP00000237380 | ENSP00000356437 |
| ENSP00000237380 | ENSP00000356595 |
| ENSP00000237380 | ENSP00000357047 |
| ENSP00000237380 | ENSP00000357907 |
| ENSP00000237380 | ENSP00000362948 |
| ENSP00000237380 | ENSP00000363193 |
| ENSP00000237380 | ENSP00000366746 |
| ENSP00000237455 | ENSP00000259512 |
| ENSP00000237455 | ENSP00000263897 |
| ENSP00000237455 | ENSP00000272645 |
| ENSP00000237455 | ENSP00000312735 |
| ENSP00000237455 | ENSP00000324124 |
| ENSP00000237455 | ENSP00000347836 |
| ENSP00000237455 | ENSP00000354201 |
| ENSP00000237455 | ENSP00000383911 |
| ENSP00000237455 | ENSP00000403852 |
| ENSP00000237530 | ENSP00000239891 |
| ENSP00000237530 | ENSP00000243253 |
| ENSP00000237530 | ENSP00000250498 |
| ENSP00000237530 | ENSP00000251038 |
| ENSP00000237530 | ENSP00000253003 |
| ENSP00000237530 | ENSP00000259154 |
| ENSP00000237530 | ENSP00000259569 |
| ENSP00000237530 | ENSP00000261173 |
| ENSP00000237530 | ENSP00000262554 |
| ENSP00000237530 | ENSP00000276326 |
| ENSP00000237530 | ENSP00000295770 |
| ENSP00000237530 | ENSP00000295887 |
| ENSP00000237530 | ENSP00000295989 |
| ENSP00000237530 | ENSP00000296255 |
| ENSP00000237530 | ENSP00000296786 |
| ENSP00000237530 | ENSP00000299626 |
| ENSP00000237530 | ENSP00000299767 |
| ENSP00000237530 | ENSP00000304500 |
| ENSP00000237530 | ENSP00000304592 |
| ENSP00000237530 | ENSP00000306124 |
| ENSP00000237530 | ENSP00000307275 |



|                 |                 |
|-----------------|-----------------|
| ENSP00000237530 | ENSP00000314036 |
| ENSP00000237530 | ENSP00000317331 |
| ENSP00000237530 | ENSP00000319977 |
| ENSP00000237530 | ENSP00000319979 |
| ENSP00000237530 | ENSP00000320508 |
| ENSP00000237530 | ENSP00000321239 |
| ENSP00000237530 | ENSP00000326699 |
| ENSP00000237530 | ENSP00000329466 |
| ENSP00000237530 | ENSP00000329715 |
| ENSP00000237530 | ENSP00000340466 |
| ENSP00000237530 | ENSP00000341213 |
| ENSP00000237530 | ENSP00000341538 |
| ENSP00000237530 | ENSP00000343412 |
| ENSP00000237530 | ENSP00000345528 |
| ENSP00000237530 | ENSP00000353073 |
| ENSP00000237530 | ENSP00000355890 |
| ENSP00000237530 | ENSP00000359552 |
| ENSP00000237530 | ENSP00000360149 |
| ENSP00000237530 | ENSP00000361057 |
| ENSP00000237530 | ENSP00000362592 |
| ENSP00000237530 | ENSP00000362688 |
| ENSP00000237530 | ENSP00000364188 |
| ENSP00000237530 | ENSP00000366748 |
| ENSP00000237530 | ENSP00000370414 |
| ENSP00000237530 | ENSP00000370883 |
| ENSP00000237530 | ENSP00000377527 |
| ENSP00000237530 | ENSP00000379607 |
| ENSP00000237530 | ENSP00000380793 |
| ENSP00000237530 | ENSP00000392330 |
| ENSP00000237596 | ENSP00000261813 |
| ENSP00000237596 | ENSP00000262304 |
| ENSP00000237596 | ENSP00000316454 |
| ENSP00000237596 | ENSP00000329002 |
| ENSP00000237596 | ENSP00000341838 |
| ENSP00000237596 | ENSP00000380921 |
| ENSP00000237596 | ENSP00000381565 |
| ENSP00000237596 | ENSP00000392330 |
| ENSP00000237654 | ENSP00000256398 |
| ENSP00000237654 | ENSP00000256897 |
| ENSP00000237654 | ENSP00000257789 |
| ENSP00000237654 | ENSP00000260731 |
| ENSP00000237654 | ENSP00000269214 |
| ENSP00000237654 | ENSP00000287598 |
| ENSP00000237654 | ENSP00000296509 |
| ENSP00000237654 | ENSP00000296577 |
| ENSP00000237654 | ENSP00000302530 |

|                 |                 |
|-----------------|-----------------|
| ENSP00000237654 | ENSP00000306999 |
| ENSP00000237654 | ENSP00000307853 |
| ENSP00000237654 | ENSP00000310649 |
| ENSP00000237654 | ENSP00000336524 |
| ENSP00000237654 | ENSP00000343741 |
| ENSP00000237654 | ENSP00000353698 |
| ENSP00000237654 | ENSP00000356448 |
| ENSP00000237654 | ENSP00000360621 |
| ENSP00000237654 | ENSP00000363827 |
| ENSP00000237654 | ENSP00000372023 |
| ENSP00000237654 | ENSP00000377793 |
| ENSP00000237654 | ENSP00000391723 |
| ENSP00000237822 | ENSP00000261207 |
| ENSP00000237822 | ENSP00000272167 |
| ENSP00000237822 | ENSP00000299824 |
| ENSP00000237822 | ENSP00000349145 |
| ENSP00000237837 | ENSP00000339826 |
| ENSP00000237853 | ENSP00000255764 |
| ENSP00000237853 | ENSP00000263390 |
| ENSP00000237853 | ENSP00000264157 |
| ENSP00000237853 | ENSP00000265343 |
| ENSP00000237853 | ENSP00000277541 |
| ENSP00000237853 | ENSP00000296564 |
| ENSP00000237853 | ENSP00000305689 |
| ENSP00000237853 | ENSP00000337340 |
| ENSP00000237853 | ENSP00000357494 |
| ENSP00000237853 | ENSP00000367408 |
| ENSP00000237853 | ENSP00000369695 |
| ENSP00000237853 | ENSP00000380054 |
| ENSP00000237889 | ENSP00000252102 |
| ENSP00000237889 | ENSP00000349142 |
| ENSP00000238112 | ENSP00000245934 |
| ENSP00000238112 | ENSP00000253048 |
| ENSP00000238112 | ENSP00000256383 |
| ENSP00000238112 | ENSP00000256854 |
| ENSP00000238112 | ENSP00000261531 |
| ENSP00000238112 | ENSP00000262577 |
| ENSP00000238112 | ENSP00000263629 |
| ENSP00000238112 | ENSP00000263956 |
| ENSP00000238112 | ENSP00000264335 |
| ENSP00000238112 | ENSP00000291386 |
| ENSP00000238112 | ENSP00000291688 |
| ENSP00000238112 | ENSP00000292476 |
| ENSP00000238112 | ENSP00000293860 |
| ENSP00000238112 | ENSP00000296490 |
| ENSP00000238112 | ENSP00000296930 |

|                 |                 |
|-----------------|-----------------|
| ENSP00000238112 | ENSP00000298281 |
| ENSP00000238112 | ENSP00000298310 |
| ENSP00000238112 | ENSP00000302801 |
| ENSP00000238112 | ENSP00000304704 |
| ENSP00000238112 | ENSP00000311873 |
| ENSP00000238112 | ENSP00000314348 |
| ENSP00000238112 | ENSP00000314949 |
| ENSP00000238112 | ENSP00000315791 |
| ENSP00000238112 | ENSP00000317872 |
| ENSP00000238112 | ENSP00000322570 |
| ENSP00000238112 | ENSP00000325377 |
| ENSP00000238112 | ENSP00000325448 |
| ENSP00000238112 | ENSP00000329466 |
| ENSP00000238112 | ENSP00000330343 |
| ENSP00000238112 | ENSP00000336752 |
| ENSP00000238112 | ENSP00000339109 |
| ENSP00000238112 | ENSP00000339245 |
| ENSP00000238112 | ENSP00000339353 |
| ENSP00000238112 | ENSP00000339845 |
| ENSP00000238112 | ENSP00000346236 |
| ENSP00000238112 | ENSP00000348010 |
| ENSP00000238112 | ENSP00000351697 |
| ENSP00000238112 | ENSP00000351947 |
| ENSP00000238112 | ENSP00000356405 |
| ENSP00000238112 | ENSP00000356548 |
| ENSP00000238112 | ENSP00000360532 |
| ENSP00000238112 | ENSP00000367406 |
| ENSP00000238112 | ENSP00000368349 |
| ENSP00000238112 | ENSP00000374399 |
| ENSP00000238112 | ENSP00000380453 |
| ENSP00000238112 | ENSP00000386161 |
| ENSP00000238112 | ENSP00000402038 |
| ENSP00000238256 | ENSP00000246802 |
| ENSP00000238256 | ENSP00000254940 |
| ENSP00000238256 | ENSP00000265963 |
| ENSP00000238256 | ENSP00000317992 |
| ENSP00000238256 | ENSP00000322396 |
| ENSP00000238256 | ENSP00000338862 |
| ENSP00000238256 | ENSP00000354040 |
| ENSP00000238256 | ENSP00000359345 |
| ENSP00000238256 | ENSP00000359688 |
| ENSP00000238256 | ENSP00000360412 |
| ENSP00000238256 | ENSP00000363384 |
| ENSP00000238256 | ENSP00000380982 |
| ENSP00000238256 | ENSP00000381657 |
| ENSP00000238256 | ENSP00000402338 |

|                 |                 |
|-----------------|-----------------|
| ENSP00000238341 | ENSP00000261845 |
| ENSP00000238341 | ENSP00000341268 |
| ENSP00000238341 | ENSP00000375986 |
| ENSP00000238379 | ENSP00000266095 |
| ENSP00000238558 | ENSP00000253003 |
| ENSP00000238558 | ENSP00000341551 |
| ENSP00000238558 | ENSP00000366534 |
| ENSP00000238558 | ENSP00000372023 |
| ENSP00000238616 | ENSP00000255465 |
| ENSP00000238616 | ENSP00000256398 |
| ENSP00000238616 | ENSP00000256442 |
| ENSP00000238616 | ENSP00000262457 |
| ENSP00000238616 | ENSP00000262850 |
| ENSP00000238616 | ENSP00000276014 |
| ENSP00000238616 | ENSP00000276297 |
| ENSP00000238616 | ENSP00000278412 |
| ENSP00000238616 | ENSP00000348273 |
| ENSP00000238616 | ENSP00000348577 |
| ENSP00000238647 | ENSP00000250448 |
| ENSP00000238647 | ENSP00000251968 |
| ENSP00000238647 | ENSP00000253363 |
| ENSP00000238647 | ENSP00000257934 |
| ENSP00000238647 | ENSP00000268058 |
| ENSP00000238647 | ENSP00000292211 |
| ENSP00000238647 | ENSP00000297689 |
| ENSP00000238647 | ENSP00000323780 |
| ENSP00000238647 | ENSP00000343535 |
| ENSP00000238647 | ENSP00000344936 |
| ENSP00000238647 | ENSP00000349640 |
| ENSP00000238647 | ENSP00000351908 |
| ENSP00000238647 | ENSP00000355153 |
| ENSP00000238647 | ENSP00000357484 |
| ENSP00000238647 | ENSP00000359939 |
| ENSP00000238647 | ENSP00000361433 |
| ENSP00000238647 | ENSP00000362441 |
| ENSP00000238647 | ENSP00000364699 |
| ENSP00000238647 | ENSP00000377218 |
| ENSP00000238647 | ENSP00000380414 |
| ENSP00000238647 | ENSP00000417281 |
| ENSP00000238651 | ENSP00000354501 |
| ENSP00000238788 | ENSP00000310596 |
| ENSP00000238789 | ENSP00000247843 |
| ENSP00000238789 | ENSP00000251038 |
| ENSP00000238789 | ENSP00000251968 |
| ENSP00000238789 | ENSP00000254719 |
| ENSP00000238789 | ENSP00000254940 |

|                 |                 |
|-----------------|-----------------|
| ENSP00000238789 | ENSP00000256442 |
| ENSP00000238789 | ENSP00000256996 |
| ENSP00000238789 | ENSP00000257934 |
| ENSP00000238789 | ENSP00000259050 |
| ENSP00000238789 | ENSP00000261424 |
| ENSP00000238789 | ENSP00000262518 |
| ENSP00000238789 | ENSP00000263121 |
| ENSP00000238789 | ENSP00000263208 |
| ENSP00000238789 | ENSP00000263228 |
| ENSP00000238789 | ENSP00000263795 |
| ENSP00000238789 | ENSP00000263857 |
| ENSP00000238789 | ENSP00000263974 |
| ENSP00000238789 | ENSP00000264169 |
| ENSP00000238789 | ENSP00000264183 |
| ENSP00000238789 | ENSP00000265056 |
| ENSP00000238789 | ENSP00000265990 |
| ENSP00000238789 | ENSP00000267064 |
| ENSP00000238789 | ENSP00000269127 |
| ENSP00000238789 | ENSP00000273067 |
| ENSP00000238789 | ENSP00000274140 |
| ENSP00000238789 | ENSP00000278412 |
| ENSP00000238789 | ENSP00000286317 |
| ENSP00000238789 | ENSP00000287239 |
| ENSP00000238789 | ENSP00000287598 |
| ENSP00000238789 | ENSP00000287936 |
| ENSP00000238789 | ENSP00000289528 |
| ENSP00000238789 | ENSP00000293406 |
| ENSP00000238789 | ENSP00000294168 |
| ENSP00000238789 | ENSP00000296273 |
| ENSP00000238789 | ENSP00000296328 |
| ENSP00000238789 | ENSP00000296509 |
| ENSP00000238789 | ENSP00000302530 |
| ENSP00000238789 | ENSP00000302886 |
| ENSP00000238789 | ENSP00000304593 |
| ENSP00000238789 | ENSP00000305810 |
| ENSP00000238789 | ENSP00000307208 |
| ENSP00000238789 | ENSP00000309141 |
| ENSP00000238789 | ENSP00000310129 |
| ENSP00000238789 | ENSP00000311496 |
| ENSP00000238789 | ENSP00000312735 |
| ENSP00000238789 | ENSP00000312870 |
| ENSP00000238789 | ENSP00000313171 |
| ENSP00000238789 | ENSP00000314193 |
| ENSP00000238789 | ENSP00000314949 |
| ENSP00000238789 | ENSP00000317087 |
| ENSP00000238789 | ENSP00000317468 |

|                 |                 |
|-----------------|-----------------|
| ENSP00000238789 | ENSP00000318977 |
| ENSP00000238789 | ENSP00000324124 |
| ENSP00000238789 | ENSP00000325002 |
| ENSP00000238789 | ENSP00000329419 |
| ENSP00000238789 | ENSP00000329466 |
| ENSP00000238789 | ENSP00000329933 |
| ENSP00000238789 | ENSP00000334564 |
| ENSP00000238789 | ENSP00000336842 |
| ENSP00000238789 | ENSP00000344504 |
| ENSP00000238789 | ENSP00000344537 |
| ENSP00000238789 | ENSP00000345702 |
| ENSP00000238789 | ENSP00000348442 |
| ENSP00000238789 | ENSP00000349078 |
| ENSP00000238789 | ENSP00000349213 |
| ENSP00000238789 | ENSP00000350708 |
| ENSP00000238789 | ENSP00000353458 |
| ENSP00000238789 | ENSP00000353622 |
| ENSP00000238789 | ENSP00000355205 |
| ENSP00000238789 | ENSP00000355890 |
| ENSP00000238789 | ENSP00000356405 |
| ENSP00000238789 | ENSP00000356989 |
| ENSP00000238789 | ENSP00000357048 |
| ENSP00000238789 | ENSP00000357887 |
| ENSP00000238789 | ENSP00000360116 |
| ENSP00000238789 | ENSP00000360412 |
| ENSP00000238789 | ENSP00000360621 |
| ENSP00000238789 | ENSP00000361465 |
| ENSP00000238789 | ENSP00000362208 |
| ENSP00000238789 | ENSP00000362334 |
| ENSP00000238789 | ENSP00000362688 |
| ENSP00000238789 | ENSP00000364486 |
| ENSP00000238789 | ENSP00000365025 |
| ENSP00000238789 | ENSP00000366974 |
| ENSP00000238789 | ENSP00000367029 |
| ENSP00000238789 | ENSP00000369411 |
| ENSP00000238789 | ENSP00000369716 |
| ENSP00000238789 | ENSP00000370589 |
| ENSP00000238789 | ENSP00000372023 |
| ENSP00000238789 | ENSP00000373340 |
| ENSP00000238789 | ENSP00000374213 |
| ENSP00000238789 | ENSP00000376534 |
| ENSP00000238789 | ENSP00000377747 |
| ENSP00000238789 | ENSP00000380982 |
| ENSP00000238789 | ENSP00000392028 |
| ENSP00000238789 | ENSP00000392617 |
| ENSP00000238789 | ENSP00000396704 |

|                 |                 |
|-----------------|-----------------|
| ENSP00000238789 | ENSP00000418734 |
| ENSP00000238823 | ENSP00000261700 |
| ENSP00000238823 | ENSP00000330343 |
| ENSP00000238823 | ENSP00000379607 |
| ENSP00000238831 | ENSP00000251775 |
| ENSP00000238831 | ENSP00000256433 |
| ENSP00000238831 | ENSP00000258301 |
| ENSP00000238831 | ENSP00000260643 |
| ENSP00000238831 | ENSP00000262544 |
| ENSP00000238831 | ENSP00000263116 |
| ENSP00000238831 | ENSP00000285243 |
| ENSP00000238831 | ENSP00000300022 |
| ENSP00000238831 | ENSP00000305255 |
| ENSP00000238831 | ENSP00000311134 |
| ENSP00000238831 | ENSP00000325002 |
| ENSP00000238831 | ENSP00000347329 |
| ENSP00000238831 | ENSP00000368959 |
| ENSP00000238831 | ENSP00000376871 |
| ENSP00000238831 | ENSP00000394071 |
| ENSP00000238855 | ENSP00000377148 |
| ENSP00000238855 | ENSP00000381045 |
| ENSP00000238892 | ENSP00000345731 |
| ENSP00000238892 | ENSP00000348211 |
| ENSP00000238994 | ENSP00000285896 |
| ENSP00000238994 | ENSP00000294724 |
| ENSP00000238994 | ENSP00000317904 |
| ENSP00000238994 | ENSP00000345464 |
| ENSP00000238994 | ENSP00000356489 |
| ENSP00000239125 | ENSP00000357480 |
| ENSP00000239587 | ENSP00000261424 |
| ENSP00000239587 | ENSP00000280665 |
| ENSP00000239587 | ENSP00000313171 |
| ENSP00000239587 | ENSP00000320503 |
| ENSP00000239614 | ENSP00000285398 |
| ENSP00000239690 | ENSP00000310590 |
| ENSP00000239690 | ENSP00000322706 |
| ENSP00000239690 | ENSP00000394085 |
| ENSP00000239849 | ENSP00000257527 |
| ENSP00000239849 | ENSP00000269485 |
| ENSP00000239849 | ENSP00000297350 |
| ENSP00000239849 | ENSP00000309968 |
| ENSP00000239849 | ENSP00000313829 |
| ENSP00000239849 | ENSP00000348307 |
| ENSP00000239849 | ENSP00000357798 |
| ENSP00000239849 | ENSP00000375097 |
| ENSP00000239878 | ENSP00000267169 |

|                 |                 |
|-----------------|-----------------|
| ENSP00000239878 | ENSP00000341551 |
| ENSP00000239878 | ENSP00000344683 |
| ENSP00000239878 | ENSP00000348565 |
| ENSP00000239878 | ENSP00000356982 |
| ENSP00000239891 | ENSP00000243253 |
| ENSP00000239891 | ENSP00000250498 |
| ENSP00000239891 | ENSP00000262812 |
| ENSP00000239891 | ENSP00000264501 |
| ENSP00000239891 | ENSP00000266483 |
| ENSP00000239891 | ENSP00000277010 |
| ENSP00000239891 | ENSP00000295770 |
| ENSP00000239891 | ENSP00000296255 |
| ENSP00000239891 | ENSP00000299626 |
| ENSP00000239891 | ENSP00000300658 |
| ENSP00000239891 | ENSP00000308339 |
| ENSP00000239891 | ENSP00000325369 |
| ENSP00000239891 | ENSP00000330343 |
| ENSP00000239891 | ENSP00000331268 |
| ENSP00000239891 | ENSP00000333813 |
| ENSP00000239891 | ENSP00000334052 |
| ENSP00000239891 | ENSP00000346809 |
| ENSP00000239891 | ENSP00000353104 |
| ENSP00000239891 | ENSP00000353622 |
| ENSP00000239891 | ENSP00000356530 |
| ENSP00000239891 | ENSP00000359848 |
| ENSP00000239891 | ENSP00000360149 |
| ENSP00000239891 | ENSP00000361845 |
| ENSP00000239891 | ENSP00000364188 |
| ENSP00000239891 | ENSP00000380793 |
| ENSP00000239891 | ENSP00000386918 |
| ENSP00000239891 | ENSP00000401445 |
| ENSP00000239891 | ENSP00000402338 |
| ENSP00000239891 | ENSP00000415203 |
| ENSP00000239906 | ENSP00000313059 |
| ENSP00000239938 | ENSP00000247970 |
| ENSP00000239938 | ENSP00000262367 |
| ENSP00000239938 | ENSP00000263341 |
| ENSP00000239938 | ENSP00000267101 |
| ENSP00000239938 | ENSP00000300131 |
| ENSP00000239938 | ENSP00000305422 |
| ENSP00000239938 | ENSP00000329357 |
| ENSP00000239938 | ENSP00000334188 |
| ENSP00000239938 | ENSP00000355153 |
| ENSP00000239938 | ENSP00000357494 |
| ENSP00000239938 | ENSP00000362717 |
| ENSP00000239938 | ENSP00000366607 |



|                 |                 |
|-----------------|-----------------|
| ENSP00000239944 | ENSP00000243253 |
| ENSP00000239944 | ENSP00000349887 |
| ENSP00000239944 | ENSP00000365131 |
| ENSP00000240055 | ENSP00000256398 |
| ENSP00000240055 | ENSP00000262367 |
| ENSP00000240055 | ENSP00000263795 |
| ENSP00000240055 | ENSP00000263974 |
| ENSP00000240055 | ENSP00000264169 |
| ENSP00000240055 | ENSP00000265073 |
| ENSP00000240055 | ENSP00000286317 |
| ENSP00000240055 | ENSP00000296509 |
| ENSP00000240055 | ENSP00000298937 |
| ENSP00000240055 | ENSP00000307850 |
| ENSP00000240055 | ENSP00000316328 |
| ENSP00000240055 | ENSP00000329357 |
| ENSP00000240055 | ENSP00000329933 |
| ENSP00000240055 | ENSP00000331310 |
| ENSP00000240055 | ENSP00000344537 |
| ENSP00000240055 | ENSP00000345702 |
| ENSP00000240055 | ENSP00000350967 |
| ENSP00000240055 | ENSP00000352738 |
| ENSP00000240055 | ENSP00000354633 |
| ENSP00000240055 | ENSP00000360621 |
| ENSP00000240055 | ENSP00000363779 |
| ENSP00000240055 | ENSP00000369785 |
| ENSP00000240055 | ENSP00000386759 |
| ENSP00000240055 | ENSP00000396620 |
| ENSP00000240079 | ENSP00000261017 |
| ENSP00000240079 | ENSP00000261597 |
| ENSP00000240079 | ENSP00000263036 |
| ENSP00000240079 | ENSP00000305503 |
| ENSP00000240079 | ENSP00000317542 |
| ENSP00000240079 | ENSP00000326767 |
| ENSP00000240079 | ENSP00000327077 |
| ENSP00000240079 | ENSP00000343635 |
| ENSP00000240079 | ENSP00000349640 |
| ENSP00000240079 | ENSP00000352425 |
| ENSP00000240079 | ENSP00000357448 |
| ENSP00000240079 | ENSP00000367265 |
| ENSP00000240079 | ENSP00000392896 |
| ENSP00000240159 | ENSP00000246548 |
| ENSP00000240159 | ENSP00000249636 |
| ENSP00000240159 | ENSP00000261396 |
| ENSP00000240159 | ENSP00000261424 |
| ENSP00000240159 | ENSP00000261601 |
| ENSP00000240159 | ENSP00000263208 |

|                 |                 |
|-----------------|-----------------|
| ENSP00000240159 | ENSP00000264183 |
| ENSP00000240159 | ENSP00000264515 |
| ENSP00000240159 | ENSP00000265990 |
| ENSP00000240159 | ENSP00000270225 |
| ENSP00000240159 | ENSP00000274140 |
| ENSP00000240159 | ENSP00000282077 |
| ENSP00000240159 | ENSP00000287437 |
| ENSP00000240159 | ENSP00000295066 |
| ENSP00000240159 | ENSP00000296257 |
| ENSP00000240159 | ENSP00000296786 |
| ENSP00000240159 | ENSP00000298139 |
| ENSP00000240159 | ENSP00000302160 |
| ENSP00000240159 | ENSP00000304593 |
| ENSP00000240159 | ENSP00000310596 |
| ENSP00000240159 | ENSP00000312244 |
| ENSP00000240159 | ENSP00000313171 |
| ENSP00000240159 | ENSP00000317039 |
| ENSP00000240159 | ENSP00000321636 |
| ENSP00000240159 | ENSP00000324792 |
| ENSP00000240159 | ENSP00000325863 |
| ENSP00000240159 | ENSP00000327197 |
| ENSP00000240159 | ENSP00000330343 |
| ENSP00000240159 | ENSP00000331310 |
| ENSP00000240159 | ENSP00000334474 |
| ENSP00000240159 | ENSP00000347232 |
| ENSP00000240159 | ENSP00000347602 |
| ENSP00000240159 | ENSP00000351284 |
| ENSP00000240159 | ENSP00000356989 |
| ENSP00000240159 | ENSP00000360116 |
| ENSP00000240159 | ENSP00000360473 |
| ENSP00000240159 | ENSP00000366135 |
| ENSP00000240159 | ENSP00000377655 |
| ENSP00000240159 | ENSP00000377793 |
| ENSP00000240159 | ENSP00000379217 |
| ENSP00000240159 | ENSP00000380460 |
| ENSP00000240159 | ENSP00000384900 |
| ENSP00000240159 | ENSP00000386759 |
| ENSP00000240159 | ENSP00000394791 |
| ENSP00000240159 | ENSP00000402527 |
| ENSP00000240185 | ENSP00000251038 |
| ENSP00000240185 | ENSP00000253363 |
| ENSP00000240185 | ENSP00000255764 |
| ENSP00000240185 | ENSP00000261531 |
| ENSP00000240185 | ENSP00000262803 |
| ENSP00000240185 | ENSP00000268957 |
| ENSP00000240185 | ENSP00000285896 |

|                 |                 |
|-----------------|-----------------|
| ENSP00000240185 | ENSP00000290231 |
| ENSP00000240185 | ENSP00000301364 |
| ENSP00000240185 | ENSP00000304704 |
| ENSP00000240185 | ENSP00000315791 |
| ENSP00000240185 | ENSP00000320949 |
| ENSP00000240185 | ENSP00000325376 |
| ENSP00000240185 | ENSP00000331879 |
| ENSP00000240185 | ENSP00000332444 |
| ENSP00000240185 | ENSP00000334061 |
| ENSP00000240185 | ENSP00000336712 |
| ENSP00000240185 | ENSP00000337340 |
| ENSP00000240185 | ENSP00000338862 |
| ENSP00000240185 | ENSP00000347948 |
| ENSP00000240185 | ENSP00000348168 |
| ENSP00000240185 | ENSP00000348708 |
| ENSP00000240185 | ENSP00000349594 |
| ENSP00000240185 | ENSP00000354522 |
| ENSP00000240185 | ENSP00000354673 |
| ENSP00000240185 | ENSP00000358997 |
| ENSP00000240185 | ENSP00000359531 |
| ENSP00000240185 | ENSP00000360532 |
| ENSP00000240185 | ENSP00000362900 |
| ENSP00000240185 | ENSP00000366135 |
| ENSP00000240185 | ENSP00000366843 |
| ENSP00000240185 | ENSP00000371155 |
| ENSP00000240185 | ENSP00000374455 |
| ENSP00000240185 | ENSP00000379607 |
| ENSP00000240185 | ENSP00000391723 |
| ENSP00000240304 | ENSP00000244520 |
| ENSP00000240304 | ENSP00000254193 |
| ENSP00000240304 | ENSP00000258416 |
| ENSP00000240304 | ENSP00000261973 |
| ENSP00000240304 | ENSP00000262982 |
| ENSP00000240304 | ENSP00000266735 |
| ENSP00000240304 | ENSP00000268206 |
| ENSP00000240304 | ENSP00000283195 |
| ENSP00000240304 | ENSP00000296805 |
| ENSP00000240304 | ENSP00000300413 |
| ENSP00000240304 | ENSP00000304350 |
| ENSP00000240304 | ENSP00000304370 |
| ENSP00000240304 | ENSP00000305790 |
| ENSP00000240304 | ENSP00000307863 |
| ENSP00000240304 | ENSP00000307939 |
| ENSP00000240304 | ENSP00000308546 |
| ENSP00000240304 | ENSP00000308925 |
| ENSP00000240304 | ENSP00000309457 |

|                 |                 |
|-----------------|-----------------|
| ENSP00000240304 | ENSP00000310448 |
| ENSP00000240304 | ENSP00000314311 |
| ENSP00000240304 | ENSP00000315700 |
| ENSP00000240304 | ENSP00000315859 |
| ENSP00000240304 | ENSP00000319341 |
| ENSP00000240304 | ENSP00000326806 |
| ENSP00000240304 | ENSP00000332103 |
| ENSP00000240304 | ENSP00000334148 |
| ENSP00000240304 | ENSP00000335321 |
| ENSP00000240304 | ENSP00000337340 |
| ENSP00000240304 | ENSP00000337405 |
| ENSP00000240304 | ENSP00000339145 |
| ENSP00000240304 | ENSP00000342374 |
| ENSP00000240304 | ENSP00000344241 |
| ENSP00000240304 | ENSP00000346986 |
| ENSP00000240304 | ENSP00000348010 |
| ENSP00000240304 | ENSP00000354720 |
| ENSP00000240304 | ENSP00000357631 |
| ENSP00000240304 | ENSP00000361577 |
| ENSP00000240304 | ENSP00000364289 |
| ENSP00000240304 | ENSP00000366607 |
| ENSP00000240304 | ENSP00000376309 |
| ENSP00000240304 | ENSP00000377262 |
| ENSP00000240304 | ENSP00000379607 |
| ENSP00000240304 | ENSP00000412566 |
| ENSP00000240304 | ENSP00000416959 |
| ENSP00000240304 | ENSP00000420195 |
| ENSP00000240316 | ENSP00000242872 |
| ENSP00000240316 | ENSP00000244769 |
| ENSP00000240316 | ENSP00000250113 |
| ENSP00000240316 | ENSP00000252699 |
| ENSP00000240316 | ENSP00000260129 |
| ENSP00000240316 | ENSP00000260648 |
| ENSP00000240316 | ENSP00000262127 |
| ENSP00000240316 | ENSP00000262375 |
| ENSP00000240316 | ENSP00000262643 |
| ENSP00000240316 | ENSP00000263925 |
| ENSP00000240316 | ENSP00000264982 |
| ENSP00000240316 | ENSP00000270176 |
| ENSP00000240316 | ENSP00000293362 |
| ENSP00000240316 | ENSP00000297788 |
| ENSP00000240316 | ENSP00000314837 |
| ENSP00000240316 | ENSP00000318821 |
| ENSP00000240316 | ENSP00000324203 |
| ENSP00000240316 | ENSP00000329466 |
| ENSP00000240316 | ENSP00000342381 |

|                 |                 |
|-----------------|-----------------|
| ENSP00000240316 | ENSP00000349465 |
| ENSP00000240316 | ENSP00000352257 |
| ENSP00000240316 | ENSP00000354501 |
| ENSP00000240316 | ENSP00000363787 |
| ENSP00000240316 | ENSP00000364398 |
| ENSP00000240316 | ENSP00000364591 |
| ENSP00000240316 | ENSP00000365025 |
| ENSP00000240316 | ENSP00000365198 |
| ENSP00000240316 | ENSP00000370083 |
| ENSP00000240316 | ENSP00000370119 |
| ENSP00000240316 | ENSP00000370671 |
| ENSP00000240316 | ENSP00000370968 |
| ENSP00000240316 | ENSP00000382562 |
| ENSP00000240316 | ENSP00000386394 |
| ENSP00000240316 | ENSP00000396439 |
| ENSP00000240316 | ENSP00000412566 |
| ENSP00000240316 | ENSP00000419235 |
| ENSP00000240335 | ENSP00000250448 |
| ENSP00000240335 | ENSP00000297261 |
| ENSP00000240423 | ENSP00000243103 |
| ENSP00000240423 | ENSP00000247970 |
| ENSP00000240423 | ENSP00000249499 |
| ENSP00000240423 | ENSP00000249504 |
| ENSP00000240423 | ENSP00000251496 |
| ENSP00000240423 | ENSP00000260731 |
| ENSP00000240423 | ENSP00000260766 |
| ENSP00000240423 | ENSP00000261531 |
| ENSP00000240423 | ENSP00000263710 |
| ENSP00000240423 | ENSP00000269127 |
| ENSP00000240423 | ENSP00000283921 |
| ENSP00000240423 | ENSP00000297338 |
| ENSP00000240423 | ENSP00000302114 |
| ENSP00000240423 | ENSP00000304437 |
| ENSP00000240423 | ENSP00000308699 |
| ENSP00000240423 | ENSP00000311873 |
| ENSP00000240423 | ENSP00000318977 |
| ENSP00000240423 | ENSP00000325017 |
| ENSP00000240423 | ENSP00000334675 |
| ENSP00000240423 | ENSP00000336606 |
| ENSP00000240423 | ENSP00000339109 |
| ENSP00000240423 | ENSP00000341243 |
| ENSP00000240423 | ENSP00000341382 |
| ENSP00000240423 | ENSP00000347978 |
| ENSP00000240423 | ENSP00000348089 |
| ENSP00000240423 | ENSP00000353793 |
| ENSP00000240423 | ENSP00000354995 |

|                 |                 |
|-----------------|-----------------|
| ENSP00000240423 | ENSP00000356607 |
| ENSP00000240423 | ENSP00000358062 |
| ENSP00000240423 | ENSP00000358478 |
| ENSP00000240423 | ENSP00000360532 |
| ENSP00000240423 | ENSP00000361264 |
| ENSP00000240423 | ENSP00000362441 |
| ENSP00000240423 | ENSP00000366746 |
| ENSP00000240423 | ENSP00000369716 |
| ENSP00000240423 | ENSP00000372023 |
| ENSP00000240423 | ENSP00000377747 |
| ENSP00000240423 | ENSP00000377793 |
| ENSP00000240423 | ENSP00000384675 |
| ENSP00000240423 | ENSP00000392028 |
| ENSP00000240423 | ENSP00000396704 |
| ENSP00000240423 | ENSP00000405963 |
| ENSP00000240488 | ENSP00000256442 |
| ENSP00000240488 | ENSP00000262315 |
| ENSP00000240488 | ENSP00000263187 |
| ENSP00000240488 | ENSP00000278616 |
| ENSP00000240488 | ENSP00000296273 |
| ENSP00000240488 | ENSP00000313171 |
| ENSP00000240488 | ENSP00000313420 |
| ENSP00000240488 | ENSP00000343392 |
| ENSP00000240488 | ENSP00000343741 |
| ENSP00000240488 | ENSP00000355167 |
| ENSP00000240488 | ENSP00000360310 |
| ENSP00000240488 | ENSP00000369411 |
| ENSP00000240488 | ENSP00000370151 |
| ENSP00000240488 | ENSP00000377384 |
| ENSP00000240587 | ENSP00000326296 |
| ENSP00000240587 | ENSP00000331608 |
| ENSP00000240587 | ENSP00000344456 |
| ENSP00000240587 | ENSP00000346155 |
| ENSP00000240587 | ENSP00000347294 |
| ENSP00000240587 | ENSP00000354586 |
| ENSP00000240587 | ENSP00000358799 |
| ENSP00000240587 | ENSP00000364912 |
| ENSP00000240618 | ENSP00000246551 |
| ENSP00000240618 | ENSP00000262629 |
| ENSP00000240618 | ENSP00000356329 |
| ENSP00000240618 | ENSP00000360286 |
| ENSP00000240618 | ENSP00000402134 |
| ENSP00000240652 | ENSP00000253796 |
| ENSP00000240652 | ENSP00000254661 |
| ENSP00000240652 | ENSP00000370421 |
| ENSP00000240851 | ENSP00000247970 |

|                 |                 |
|-----------------|-----------------|
| ENSP00000240851 | ENSP00000251968 |
| ENSP00000240851 | ENSP00000282892 |
| ENSP00000240851 | ENSP00000297338 |
| ENSP00000240851 | ENSP00000347294 |
| ENSP00000240851 | ENSP00000379607 |
| ENSP00000240922 | ENSP00000247843 |
| ENSP00000240922 | ENSP00000251038 |
| ENSP00000240922 | ENSP00000261745 |
| ENSP00000240922 | ENSP00000264995 |
| ENSP00000240922 | ENSP00000268661 |
| ENSP00000240922 | ENSP00000274606 |
| ENSP00000240922 | ENSP00000278572 |
| ENSP00000240922 | ENSP00000283109 |
| ENSP00000240922 | ENSP00000286428 |
| ENSP00000240922 | ENSP00000296509 |
| ENSP00000240922 | ENSP00000296543 |
| ENSP00000240922 | ENSP00000304370 |
| ENSP00000240922 | ENSP00000307684 |
| ENSP00000240922 | ENSP00000309555 |
| ENSP00000240922 | ENSP00000317992 |
| ENSP00000240922 | ENSP00000323858 |
| ENSP00000240922 | ENSP00000323967 |
| ENSP00000240922 | ENSP00000334148 |
| ENSP00000240922 | ENSP00000350512 |
| ENSP00000240922 | ENSP00000354850 |
| ENSP00000240922 | ENSP00000354972 |
| ENSP00000240922 | ENSP00000359290 |
| ENSP00000240922 | ENSP00000360532 |
| ENSP00000240922 | ENSP00000362105 |
| ENSP00000240922 | ENSP00000377617 |
| ENSP00000240922 | ENSP00000384474 |
| ENSP00000240922 | ENSP00000392617 |
| ENSP00000240922 | ENSP00000416583 |
| ENSP00000240922 | ENSP00000417229 |
| ENSP00000240922 | ENSP00000417763 |
| ENSP00000241041 | ENSP00000349016 |
| ENSP00000241041 | ENSP00000356563 |
| ENSP00000241041 | ENSP00000357051 |
| ENSP00000241051 | ENSP00000261531 |
| ENSP00000241051 | ENSP00000294008 |
| ENSP00000241051 | ENSP00000359531 |
| ENSP00000241051 | ENSP00000360532 |
| ENSP00000241052 | ENSP00000255390 |
| ENSP00000241052 | ENSP00000260045 |
| ENSP00000241052 | ENSP00000266126 |
| ENSP00000241052 | ENSP00000270776 |

|                 |                 |
|-----------------|-----------------|
| ENSP00000241052 | ENSP00000274030 |
| ENSP00000241052 | ENSP00000284957 |
| ENSP00000241052 | ENSP00000284981 |
| ENSP00000241052 | ENSP00000285896 |
| ENSP00000241052 | ENSP00000287078 |
| ENSP00000241052 | ENSP00000299335 |
| ENSP00000241052 | ENSP00000304292 |
| ENSP00000241052 | ENSP00000308925 |
| ENSP00000241052 | ENSP00000310668 |
| ENSP00000241052 | ENSP00000340836 |
| ENSP00000241052 | ENSP00000340944 |
| ENSP00000241052 | ENSP00000344460 |
| ENSP00000241052 | ENSP00000349016 |
| ENSP00000241052 | ENSP00000356595 |
| ENSP00000241052 | ENSP00000356785 |
| ENSP00000241052 | ENSP00000357494 |
| ENSP00000241052 | ENSP00000358312 |
| ENSP00000241052 | ENSP00000360286 |
| ENSP00000241052 | ENSP00000373700 |
| ENSP00000241052 | ENSP00000374467 |
| ENSP00000241052 | ENSP00000377665 |
| ENSP00000241052 | ENSP00000379678 |
| ENSP00000241052 | ENSP00000394869 |
| ENSP00000241052 | ENSP00000407401 |
| ENSP00000241071 | ENSP00000273398 |
| ENSP00000241071 | ENSP00000310129 |
| ENSP00000241071 | ENSP00000337501 |
| ENSP00000241071 | ENSP00000379612 |
| ENSP00000241071 | ENSP00000417748 |
| ENSP00000241436 | ENSP00000249636 |
| ENSP00000241436 | ENSP00000254719 |
| ENSP00000241436 | ENSP00000258428 |
| ENSP00000241436 | ENSP00000258774 |
| ENSP00000241436 | ENSP00000264233 |
| ENSP00000241436 | ENSP00000264926 |
| ENSP00000241436 | ENSP00000268124 |
| ENSP00000241436 | ENSP00000269214 |
| ENSP00000241436 | ENSP00000306561 |
| ENSP00000241436 | ENSP00000306999 |
| ENSP00000241436 | ENSP00000308944 |
| ENSP00000241436 | ENSP00000311873 |
| ENSP00000241436 | ENSP00000313350 |
| ENSP00000241436 | ENSP00000318977 |
| ENSP00000241436 | ENSP00000323439 |
| ENSP00000241436 | ENSP00000340305 |
| ENSP00000241436 | ENSP00000340879 |



|                 |                 |
|-----------------|-----------------|
| ENSP00000241436 | ENSP00000343392 |
| ENSP00000241436 | ENSP00000347978 |
| ENSP00000241436 | ENSP00000351284 |
| ENSP00000241436 | ENSP00000351697 |
| ENSP00000241436 | ENSP00000352257 |
| ENSP00000241436 | ENSP00000354720 |
| ENSP00000241436 | ENSP00000361310 |
| ENSP00000241436 | ENSP00000364270 |
| ENSP00000241436 | ENSP00000368438 |
| ENSP00000241436 | ENSP00000369335 |
| ENSP00000241436 | ENSP00000370150 |
| ENSP00000241436 | ENSP00000372316 |
| ENSP00000241436 | ENSP00000381657 |
| ENSP00000241453 | ENSP00000264122 |
| ENSP00000241453 | ENSP00000340944 |
| ENSP00000241453 | ENSP00000348685 |
| ENSP00000241453 | ENSP00000364893 |
| ENSP00000241453 | ENSP00000415151 |
| ENSP00000241502 | ENSP00000261531 |
| ENSP00000241502 | ENSP00000369816 |
| ENSP00000241527 | ENSP00000244769 |
| ENSP00000241527 | ENSP00000301585 |
| ENSP00000241527 | ENSP00000419740 |
| ENSP00000241600 | ENSP00000242057 |
| ENSP00000241600 | ENSP00000245539 |
| ENSP00000241600 | ENSP00000254928 |
| ENSP00000241600 | ENSP00000256897 |
| ENSP00000241600 | ENSP00000258383 |
| ENSP00000241600 | ENSP00000258455 |
| ENSP00000241600 | ENSP00000260443 |
| ENSP00000241600 | ENSP00000262030 |
| ENSP00000241600 | ENSP00000263657 |
| ENSP00000241600 | ENSP00000264705 |
| ENSP00000241600 | ENSP00000268206 |
| ENSP00000241600 | ENSP00000270625 |
| ENSP00000241600 | ENSP00000272418 |
| ENSP00000241600 | ENSP00000274606 |
| ENSP00000241600 | ENSP00000278572 |
| ENSP00000241600 | ENSP00000279242 |
| ENSP00000241600 | ENSP00000280557 |
| ENSP00000241600 | ENSP00000288937 |
| ENSP00000241600 | ENSP00000295491 |
| ENSP00000241600 | ENSP00000296674 |
| ENSP00000241600 | ENSP00000296802 |
| ENSP00000241600 | ENSP00000296805 |
| ENSP00000241600 | ENSP00000297908 |

|                 |                 |
|-----------------|-----------------|
| ENSP00000241600 | ENSP00000299767 |
| ENSP00000241600 | ENSP00000301585 |
| ENSP00000241600 | ENSP00000301729 |
| ENSP00000241600 | ENSP00000302896 |
| ENSP00000241600 | ENSP00000306548 |
| ENSP00000241600 | ENSP00000308275 |
| ENSP00000241600 | ENSP00000311028 |
| ENSP00000241600 | ENSP00000312311 |
| ENSP00000241600 | ENSP00000314129 |
| ENSP00000241600 | ENSP00000315017 |
| ENSP00000241600 | ENSP00000317376 |
| ENSP00000241600 | ENSP00000318646 |
| ENSP00000241600 | ENSP00000321636 |
| ENSP00000241600 | ENSP00000323856 |
| ENSP00000241600 | ENSP00000326981 |
| ENSP00000241600 | ENSP00000331019 |
| ENSP00000241600 | ENSP00000336702 |
| ENSP00000241600 | ENSP00000337127 |
| ENSP00000241600 | ENSP00000337839 |
| ENSP00000241600 | ENSP00000339095 |
| ENSP00000241600 | ENSP00000339844 |
| ENSP00000241600 | ENSP00000341692 |
| ENSP00000241600 | ENSP00000341885 |
| ENSP00000241600 | ENSP00000343081 |
| ENSP00000241600 | ENSP00000345096 |
| ENSP00000241600 | ENSP00000346022 |
| ENSP00000241600 | ENSP00000346050 |
| ENSP00000241600 | ENSP00000346453 |
| ENSP00000241600 | ENSP00000347087 |
| ENSP00000241600 | ENSP00000348722 |
| ENSP00000241600 | ENSP00000348965 |
| ENSP00000241600 | ENSP00000352706 |
| ENSP00000241600 | ENSP00000355471 |
| ENSP00000241600 | ENSP00000356134 |
| ENSP00000241600 | ENSP00000358140 |
| ENSP00000241600 | ENSP00000358812 |
| ENSP00000241600 | ENSP00000360498 |
| ENSP00000241600 | ENSP00000360782 |
| ENSP00000241600 | ENSP00000361076 |
| ENSP00000241600 | ENSP00000361206 |
| ENSP00000241600 | ENSP00000361465 |
| ENSP00000241600 | ENSP00000362036 |
| ENSP00000241600 | ENSP00000362135 |
| ENSP00000241600 | ENSP00000362208 |
| ENSP00000241600 | ENSP00000362744 |
| ENSP00000241600 | ENSP00000363018 |

|                 |                 |
|-----------------|-----------------|
| ENSP00000241600 | ENSP00000364320 |
| ENSP00000241600 | ENSP00000368790 |
| ENSP00000241600 | ENSP00000369757 |
| ENSP00000241600 | ENSP00000370258 |
| ENSP00000241600 | ENSP00000372445 |
| ENSP00000241600 | ENSP00000377486 |
| ENSP00000241600 | ENSP00000377640 |
| ENSP00000241600 | ENSP00000377865 |
| ENSP00000241600 | ENSP00000379339 |
| ENSP00000241600 | ENSP00000379888 |
| ENSP00000241600 | ENSP00000382250 |
| ENSP00000241600 | ENSP00000392859 |
| ENSP00000241600 | ENSP00000393241 |
| ENSP00000241600 | ENSP00000403175 |
| ENSP00000241600 | ENSP00000412583 |
| ENSP00000241600 | ENSP00000414321 |
| ENSP00000241600 | ENSP00000416110 |
| ENSP00000241600 | ENSP00000420714 |
| ENSP00000242057 | ENSP00000250448 |
| ENSP00000242057 | ENSP00000252996 |
| ENSP00000242057 | ENSP00000267163 |
| ENSP00000242057 | ENSP00000269385 |
| ENSP00000242057 | ENSP00000301764 |
| ENSP00000242057 | ENSP00000327048 |
| ENSP00000242057 | ENSP00000327213 |
| ENSP00000242057 | ENSP00000329357 |
| ENSP00000242057 | ENSP00000340823 |
| ENSP00000242057 | ENSP00000341692 |
| ENSP00000242057 | ENSP00000344456 |
| ENSP00000242057 | ENSP00000346067 |
| ENSP00000242057 | ENSP00000348551 |
| ENSP00000242057 | ENSP00000351407 |
| ENSP00000242057 | ENSP00000357341 |
| ENSP00000242057 | ENSP00000377969 |
| ENSP00000242057 | ENSP00000384109 |
| ENSP00000242057 | ENSP00000399968 |
| ENSP00000242067 | ENSP00000245157 |
| ENSP00000242067 | ENSP00000264499 |
| ENSP00000242067 | ENSP00000268057 |
| ENSP00000242067 | ENSP00000295240 |
| ENSP00000242067 | ENSP00000296135 |
| ENSP00000242067 | ENSP00000319062 |
| ENSP00000242067 | ENSP00000353701 |
| ENSP00000242067 | ENSP00000370031 |
| ENSP00000242067 | ENSP00000376946 |
| ENSP00000242109 | ENSP00000345528 |

|                 |                 |
|-----------------|-----------------|
| ENSP00000242152 | ENSP00000267017 |
| ENSP00000242152 | ENSP00000307822 |
| ENSP00000242152 | ENSP00000332225 |
| ENSP00000242152 | ENSP00000335074 |
| ENSP00000242152 | ENSP00000339377 |
| ENSP00000242152 | ENSP00000368766 |
| ENSP00000242208 | ENSP00000243786 |
| ENSP00000242208 | ENSP00000295633 |
| ENSP00000242208 | ENSP00000311184 |
| ENSP00000242208 | ENSP00000355010 |
| ENSP00000242208 | ENSP00000362299 |
| ENSP00000242210 | ENSP00000310800 |
| ENSP00000242285 | ENSP00000243918 |
| ENSP00000242285 | ENSP00000253083 |
| ENSP00000242285 | ENSP00000256658 |
| ENSP00000242285 | ENSP00000260257 |
| ENSP00000242285 | ENSP00000261558 |
| ENSP00000242285 | ENSP00000261842 |
| ENSP00000242285 | ENSP00000262812 |
| ENSP00000242285 | ENSP00000269122 |
| ENSP00000242285 | ENSP00000270176 |
| ENSP00000242285 | ENSP00000299601 |
| ENSP00000242285 | ENSP00000314499 |
| ENSP00000242285 | ENSP00000317431 |
| ENSP00000242285 | ENSP00000320543 |
| ENSP00000242285 | ENSP00000326550 |
| ENSP00000242285 | ENSP00000340935 |
| ENSP00000242285 | ENSP00000346566 |
| ENSP00000242285 | ENSP00000350199 |
| ENSP00000242285 | ENSP00000352603 |
| ENSP00000242285 | ENSP00000360798 |
| ENSP00000242285 | ENSP00000365891 |
| ENSP00000242285 | ENSP00000368818 |
| ENSP00000242285 | ENSP00000371341 |
| ENSP00000242285 | ENSP00000377148 |
| ENSP00000242285 | ENSP00000379607 |
| ENSP00000242317 | ENSP00000300249 |
| ENSP00000242317 | ENSP00000327009 |
| ENSP00000242317 | ENSP00000334188 |
| ENSP00000242317 | ENSP00000351665 |
| ENSP00000242317 | ENSP00000356579 |
| ENSP00000242317 | ENSP00000377793 |
| ENSP00000242338 | ENSP00000248098 |
| ENSP00000242338 | ENSP00000263409 |
| ENSP00000242338 | ENSP00000284981 |
| ENSP00000242338 | ENSP00000293925 |

|                 |                 |
|-----------------|-----------------|
| ENSP00000242338 | ENSP00000300574 |
| ENSP00000242338 | ENSP00000309338 |
| ENSP00000242338 | ENSP00000338799 |
| ENSP00000242338 | ENSP00000355370 |
| ENSP00000242338 | ENSP00000376188 |
| ENSP00000242351 | ENSP00000329466 |
| ENSP00000242351 | ENSP00000379607 |
| ENSP00000242465 | ENSP00000295897 |
| ENSP00000242465 | ENSP00000337396 |
| ENSP00000242465 | ENSP00000358925 |
| ENSP00000242465 | ENSP00000364403 |
| ENSP00000242480 | ENSP00000248098 |
| ENSP00000242480 | ENSP00000300131 |
| ENSP00000242480 | ENSP00000309555 |
| ENSP00000242480 | ENSP00000342032 |
| ENSP00000242480 | ENSP00000356972 |
| ENSP00000242480 | ENSP00000357494 |
| ENSP00000242480 | ENSP00000362717 |
| ENSP00000242480 | ENSP00000366607 |
| ENSP00000242576 | ENSP00000248553 |
| ENSP00000242576 | ENSP00000264451 |
| ENSP00000242576 | ENSP00000265081 |
| ENSP00000242576 | ENSP00000265304 |
| ENSP00000242576 | ENSP00000267430 |
| ENSP00000242576 | ENSP00000291565 |
| ENSP00000242576 | ENSP00000301764 |
| ENSP00000242576 | ENSP00000307853 |
| ENSP00000242576 | ENSP00000310520 |
| ENSP00000242576 | ENSP00000315644 |
| ENSP00000242576 | ENSP00000340879 |
| ENSP00000242576 | ENSP00000343392 |
| ENSP00000242576 | ENSP00000350491 |
| ENSP00000242576 | ENSP00000355890 |
| ENSP00000242576 | ENSP00000356785 |
| ENSP00000242576 | ENSP00000363021 |
| ENSP00000242576 | ENSP00000364126 |
| ENSP00000242576 | ENSP00000364270 |
| ENSP00000242576 | ENSP00000365534 |
| ENSP00000242576 | ENSP00000368438 |
| ENSP00000242576 | ENSP00000370376 |
| ENSP00000242576 | ENSP00000374213 |
| ENSP00000242576 | ENSP00000414066 |
| ENSP00000242576 | ENSP00000420037 |
| ENSP00000242719 | ENSP00000259808 |
| ENSP00000242719 | ENSP00000262320 |
| ENSP00000242719 | ENSP00000262854 |

|                 |                 |
|-----------------|-----------------|
| ENSP00000242719 | ENSP00000263036 |
| ENSP00000242719 | ENSP00000272645 |
| ENSP00000242719 | ENSP00000307567 |
| ENSP00000242719 | ENSP00000312735 |
| ENSP00000242719 | ENSP00000317891 |
| ENSP00000242719 | ENSP00000324124 |
| ENSP00000242719 | ENSP00000341551 |
| ENSP00000242719 | ENSP00000345530 |
| ENSP00000242719 | ENSP00000359688 |
| ENSP00000242719 | ENSP00000360116 |
| ENSP00000242719 | ENSP00000360798 |
| ENSP00000242719 | ENSP00000360992 |
| ENSP00000242719 | ENSP00000379612 |
| ENSP00000242719 | ENSP00000403852 |
| ENSP00000242728 | ENSP00000250003 |
| ENSP00000242728 | ENSP00000305422 |
| ENSP00000242728 | ENSP00000329357 |
| ENSP00000242728 | ENSP00000331057 |
| ENSP00000242728 | ENSP00000386165 |
| ENSP00000242784 | ENSP00000243563 |
| ENSP00000242872 | ENSP00000254908 |
| ENSP00000242872 | ENSP00000256637 |
| ENSP00000242872 | ENSP00000261745 |
| ENSP00000242872 | ENSP00000262643 |
| ENSP00000242872 | ENSP00000264335 |
| ENSP00000242872 | ENSP00000267163 |
| ENSP00000242872 | ENSP00000276893 |
| ENSP00000242872 | ENSP00000283006 |
| ENSP00000242872 | ENSP00000301280 |
| ENSP00000242872 | ENSP00000319788 |
| ENSP00000242872 | ENSP00000336868 |
| ENSP00000242872 | ENSP00000353868 |
| ENSP00000242872 | ENSP00000359518 |
| ENSP00000242872 | ENSP00000360621 |
| ENSP00000242872 | ENSP00000362824 |
| ENSP00000242872 | ENSP00000368438 |
| ENSP00000242872 | ENSP00000382492 |
| ENSP00000242872 | ENSP00000387477 |
| ENSP00000243103 | ENSP00000318423 |
| ENSP00000243103 | ENSP00000326296 |
| ENSP00000243167 | ENSP00000245222 |
| ENSP00000243167 | ENSP00000251038 |
| ENSP00000243167 | ENSP00000256854 |
| ENSP00000243167 | ENSP00000263985 |
| ENSP00000243167 | ENSP00000264161 |
| ENSP00000243167 | ENSP00000318351 |

|                 |                 |
|-----------------|-----------------|
| ENSP00000243167 | ENSP00000355890 |
| ENSP00000243167 | ENSP00000360268 |
| ENSP00000243167 | ENSP00000370377 |
| ENSP00000243253 | ENSP00000245680 |
| ENSP00000243253 | ENSP00000247138 |
| ENSP00000243253 | ENSP00000248378 |
| ENSP00000243253 | ENSP00000249356 |
| ENSP00000243253 | ENSP00000250498 |
| ENSP00000243253 | ENSP00000253099 |
| ENSP00000243253 | ENSP00000257575 |
| ENSP00000243253 | ENSP00000259050 |
| ENSP00000243253 | ENSP00000259469 |
| ENSP00000243253 | ENSP00000259512 |
| ENSP00000243253 | ENSP00000262177 |
| ENSP00000243253 | ENSP00000262812 |
| ENSP00000243253 | ENSP00000263897 |
| ENSP00000243253 | ENSP00000265100 |
| ENSP00000243253 | ENSP00000265295 |
| ENSP00000243253 | ENSP00000267750 |
| ENSP00000243253 | ENSP00000273067 |
| ENSP00000243253 | ENSP00000274140 |
| ENSP00000243253 | ENSP00000287936 |
| ENSP00000243253 | ENSP00000290649 |
| ENSP00000243253 | ENSP00000295770 |
| ENSP00000243253 | ENSP00000295887 |
| ENSP00000243253 | ENSP00000295890 |
| ENSP00000243253 | ENSP00000296255 |
| ENSP00000243253 | ENSP00000297185 |
| ENSP00000243253 | ENSP00000298852 |
| ENSP00000243253 | ENSP00000299767 |
| ENSP00000243253 | ENSP00000302176 |
| ENSP00000243253 | ENSP00000304051 |
| ENSP00000243253 | ENSP00000304500 |
| ENSP00000243253 | ENSP00000306106 |
| ENSP00000243253 | ENSP00000307275 |
| ENSP00000243253 | ENSP00000309141 |
| ENSP00000243253 | ENSP00000311430 |
| ENSP00000243253 | ENSP00000311496 |
| ENSP00000243253 | ENSP00000314036 |
| ENSP00000243253 | ENSP00000317087 |
| ENSP00000243253 | ENSP00000317331 |
| ENSP00000243253 | ENSP00000323377 |
| ENSP00000243253 | ENSP00000326514 |
| ENSP00000243253 | ENSP00000327716 |
| ENSP00000243253 | ENSP00000328023 |
| ENSP00000243253 | ENSP00000330945 |

|                 |                 |
|-----------------|-----------------|
| ENSP00000243253 | ENSP00000331268 |
| ENSP00000243253 | ENSP00000331288 |
| ENSP00000243253 | ENSP00000332681 |
| ENSP00000243253 | ENSP00000337053 |
| ENSP00000243253 | ENSP00000337688 |
| ENSP00000243253 | ENSP00000341538 |
| ENSP00000243253 | ENSP00000342181 |
| ENSP00000243253 | ENSP00000345528 |
| ENSP00000243253 | ENSP00000347495 |
| ENSP00000243253 | ENSP00000349877 |
| ENSP00000243253 | ENSP00000349887 |
| ENSP00000243253 | ENSP00000354525 |
| ENSP00000243253 | ENSP00000357998 |
| ENSP00000243253 | ENSP00000360149 |
| ENSP00000243253 | ENSP00000360644 |
| ENSP00000243253 | ENSP00000361057 |
| ENSP00000243253 | ENSP00000361845 |
| ENSP00000243253 | ENSP00000364188 |
| ENSP00000243253 | ENSP00000366395 |
| ENSP00000243253 | ENSP00000370414 |
| ENSP00000243253 | ENSP00000371888 |
| ENSP00000243253 | ENSP00000377401 |
| ENSP00000243253 | ENSP00000381863 |
| ENSP00000243253 | ENSP00000381891 |
| ENSP00000243253 | ENSP00000382767 |
| ENSP00000243253 | ENSP00000383719 |
| ENSP00000243253 | ENSP00000386717 |
| ENSP00000243253 | ENSP00000386918 |
| ENSP00000243253 | ENSP00000389103 |
| ENSP00000243253 | ENSP00000392330 |
| ENSP00000243253 | ENSP00000397435 |
| ENSP00000243253 | ENSP00000420608 |
| ENSP00000243326 | ENSP00000260947 |
| ENSP00000243326 | ENSP00000261531 |
| ENSP00000243326 | ENSP00000263468 |
| ENSP00000243326 | ENSP00000263857 |
| ENSP00000243326 | ENSP00000278919 |
| ENSP00000243326 | ENSP00000294740 |
| ENSP00000243326 | ENSP00000297439 |
| ENSP00000243326 | ENSP00000300738 |
| ENSP00000243326 | ENSP00000310356 |
| ENSP00000243326 | ENSP00000317039 |
| ENSP00000243326 | ENSP00000317992 |
| ENSP00000243326 | ENSP00000321636 |
| ENSP00000243326 | ENSP00000329466 |
| ENSP00000243326 | ENSP00000334002 |



|                 |                 |
|-----------------|-----------------|
| ENSP00000243326 | ENSP00000347232 |
| ENSP00000243326 | ENSP00000350249 |
| ENSP00000243326 | ENSP00000353073 |
| ENSP00000243326 | ENSP00000357965 |
| ENSP00000243326 | ENSP00000358778 |
| ENSP00000243326 | ENSP00000360532 |
| ENSP00000243326 | ENSP00000361949 |
| ENSP00000243326 | ENSP00000368253 |
| ENSP00000243326 | ENSP00000369716 |
| ENSP00000243326 | ENSP00000378180 |
| ENSP00000243326 | ENSP00000378338 |
| ENSP00000243326 | ENSP00000379607 |
| ENSP00000243326 | ENSP00000379839 |
| ENSP00000243346 | ENSP00000245919 |
| ENSP00000243346 | ENSP00000256857 |
| ENSP00000243346 | ENSP00000262367 |
| ENSP00000243346 | ENSP00000270708 |
| ENSP00000243346 | ENSP00000281043 |
| ENSP00000243346 | ENSP00000315768 |
| ENSP00000243346 | ENSP00000319531 |
| ENSP00000243346 | ENSP00000319597 |
| ENSP00000243346 | ENSP00000330721 |
| ENSP00000243346 | ENSP00000331201 |
| ENSP00000243346 | ENSP00000340698 |
| ENSP00000243346 | ENSP00000341208 |
| ENSP00000243346 | ENSP00000350283 |
| ENSP00000243346 | ENSP00000359978 |
| ENSP00000243563 | ENSP00000244520 |
| ENSP00000243563 | ENSP00000251289 |
| ENSP00000243563 | ENSP00000253363 |
| ENSP00000243563 | ENSP00000254193 |
| ENSP00000243563 | ENSP00000256854 |
| ENSP00000243563 | ENSP00000260129 |
| ENSP00000243563 | ENSP00000261015 |
| ENSP00000243563 | ENSP00000261973 |
| ENSP00000243563 | ENSP00000262633 |
| ENSP00000243563 | ENSP00000262803 |
| ENSP00000243563 | ENSP00000264161 |
| ENSP00000243563 | ENSP00000264233 |
| ENSP00000243563 | ENSP00000264731 |
| ENSP00000243563 | ENSP00000264951 |
| ENSP00000243563 | ENSP00000266079 |
| ENSP00000243563 | ENSP00000266735 |
| ENSP00000243563 | ENSP00000267064 |
| ENSP00000243563 | ENSP00000268482 |
| ENSP00000243563 | ENSP00000276201 |

|                 |                 |
|-----------------|-----------------|
| ENSP00000243563 | ENSP00000278780 |
| ENSP00000243563 | ENSP00000290158 |
| ENSP00000243563 | ENSP00000293406 |
| ENSP00000243563 | ENSP00000295488 |
| ENSP00000243563 | ENSP00000297591 |
| ENSP00000243563 | ENSP00000300413 |
| ENSP00000243563 | ENSP00000301764 |
| ENSP00000243563 | ENSP00000303191 |
| ENSP00000243563 | ENSP00000304350 |
| ENSP00000243563 | ENSP00000304370 |
| ENSP00000243563 | ENSP00000304903 |
| ENSP00000243563 | ENSP00000305790 |
| ENSP00000243563 | ENSP00000307863 |
| ENSP00000243563 | ENSP00000310448 |
| ENSP00000243563 | ENSP00000310723 |
| ENSP00000243563 | ENSP00000311135 |
| ENSP00000243563 | ENSP00000314311 |
| ENSP00000243563 | ENSP00000315859 |
| ENSP00000243563 | ENSP00000316879 |
| ENSP00000243563 | ENSP00000318861 |
| ENSP00000243563 | ENSP00000324122 |
| ENSP00000243563 | ENSP00000324203 |
| ENSP00000243563 | ENSP00000326411 |
| ENSP00000243563 | ENSP00000326531 |
| ENSP00000243563 | ENSP00000326806 |
| ENSP00000243563 | ENSP00000331907 |
| ENSP00000243563 | ENSP00000334148 |
| ENSP00000243563 | ENSP00000335321 |
| ENSP00000243563 | ENSP00000337405 |
| ENSP00000243563 | ENSP00000337839 |
| ENSP00000243563 | ENSP00000341243 |
| ENSP00000243563 | ENSP00000342374 |
| ENSP00000243563 | ENSP00000343557 |
| ENSP00000243563 | ENSP00000343701 |
| ENSP00000243563 | ENSP00000345096 |
| ENSP00000243563 | ENSP00000347495 |
| ENSP00000243563 | ENSP00000348010 |
| ENSP00000243563 | ENSP00000348708 |
| ENSP00000243563 | ENSP00000349748 |
| ENSP00000243563 | ENSP00000352738 |
| ENSP00000243563 | ENSP00000354522 |
| ENSP00000243563 | ENSP00000355153 |
| ENSP00000243563 | ENSP00000355922 |
| ENSP00000243563 | ENSP00000358563 |
| ENSP00000243563 | ENSP00000359454 |
| ENSP00000243563 | ENSP00000360532 |

|                 |                 |
|-----------------|-----------------|
| ENSP00000243563 | ENSP00000360876 |
| ENSP00000243563 | ENSP00000361949 |
| ENSP00000243563 | ENSP00000362110 |
| ENSP00000243563 | ENSP00000362592 |
| ENSP00000243563 | ENSP00000362820 |
| ENSP00000243563 | ENSP00000362936 |
| ENSP00000243563 | ENSP00000363313 |
| ENSP00000243563 | ENSP00000363397 |
| ENSP00000243563 | ENSP00000364289 |
| ENSP00000243563 | ENSP00000365439 |
| ENSP00000243563 | ENSP00000366607 |
| ENSP00000243563 | ENSP00000368801 |
| ENSP00000243563 | ENSP00000370119 |
| ENSP00000243563 | ENSP00000370460 |
| ENSP00000243563 | ENSP00000379607 |
| ENSP00000243563 | ENSP00000380336 |
| ENSP00000243563 | ENSP00000386759 |
| ENSP00000243563 | ENSP00000387170 |
| ENSP00000243563 | ENSP00000393953 |
| ENSP00000243563 | ENSP00000400591 |
| ENSP00000243563 | ENSP00000412566 |
| ENSP00000243706 | ENSP00000260372 |
| ENSP00000243706 | ENSP00000282058 |
| ENSP00000243706 | ENSP00000369871 |
| ENSP00000243776 | ENSP00000247970 |
| ENSP00000243776 | ENSP00000359206 |
| ENSP00000243776 | ENSP00000366135 |
| ENSP00000243776 | ENSP00000398597 |
| ENSP00000243878 | ENSP00000258947 |
| ENSP00000243878 | ENSP00000264335 |
| ENSP00000243878 | ENSP00000264982 |
| ENSP00000243878 | ENSP00000300181 |
| ENSP00000243878 | ENSP00000347301 |
| ENSP00000243896 | ENSP00000359526 |
| ENSP00000243903 | ENSP00000247843 |
| ENSP00000243903 | ENSP00000251038 |
| ENSP00000243903 | ENSP00000253490 |
| ENSP00000243903 | ENSP00000262238 |
| ENSP00000243903 | ENSP00000263208 |
| ENSP00000243903 | ENSP00000265990 |
| ENSP00000243903 | ENSP00000300648 |
| ENSP00000243903 | ENSP00000301764 |
| ENSP00000243903 | ENSP00000302640 |
| ENSP00000243903 | ENSP00000306983 |
| ENSP00000243903 | ENSP00000317156 |
| ENSP00000243903 | ENSP00000332444 |

|                 |                 |
|-----------------|-----------------|
| ENSP00000243903 | ENSP00000336842 |
| ENSP00000243903 | ENSP00000336856 |
| ENSP00000243903 | ENSP00000341243 |
| ENSP00000243903 | ENSP00000349640 |
| ENSP00000243903 | ENSP00000355205 |
| ENSP00000243903 | ENSP00000361465 |
| ENSP00000243903 | ENSP00000364486 |
| ENSP00000243903 | ENSP00000369695 |
| ENSP00000243903 | ENSP00000384198 |
| ENSP00000243903 | ENSP00000391457 |
| ENSP00000243903 | ENSP00000400476 |
| ENSP00000243903 | ENSP00000420588 |
| ENSP00000243918 | ENSP00000255194 |
| ENSP00000243918 | ENSP00000255389 |
| ENSP00000243918 | ENSP00000262544 |
| ENSP00000243918 | ENSP00000263116 |
| ENSP00000243918 | ENSP00000265175 |
| ENSP00000243918 | ENSP00000273398 |
| ENSP00000243918 | ENSP00000283351 |
| ENSP00000243918 | ENSP00000286835 |
| ENSP00000243918 | ENSP00000295887 |
| ENSP00000243918 | ENSP00000299138 |
| ENSP00000243918 | ENSP00000305459 |
| ENSP00000243918 | ENSP00000308496 |
| ENSP00000243918 | ENSP00000309163 |
| ENSP00000243918 | ENSP00000309457 |
| ENSP00000243918 | ENSP00000314499 |
| ENSP00000243918 | ENSP00000314615 |
| ENSP00000243918 | ENSP00000321449 |
| ENSP00000243918 | ENSP00000327716 |
| ENSP00000243918 | ENSP00000329419 |
| ENSP00000243918 | ENSP00000336724 |
| ENSP00000243918 | ENSP00000344055 |
| ENSP00000243918 | ENSP00000347408 |
| ENSP00000243918 | ENSP00000349877 |
| ENSP00000243918 | ENSP00000349887 |
| ENSP00000243918 | ENSP00000354519 |
| ENSP00000243918 | ENSP00000355231 |
| ENSP00000243918 | ENSP00000356146 |
| ENSP00000243918 | ENSP00000360183 |
| ENSP00000243918 | ENSP00000365840 |
| ENSP00000243918 | ENSP00000376268 |
| ENSP00000243918 | ENSP00000377769 |
| ENSP00000243918 | ENSP00000397441 |
| ENSP00000243918 | ENSP00000402240 |
| ENSP00000243924 | ENSP00000252244 |

|                 |                 |
|-----------------|-----------------|
| ENSP00000243924 | ENSP00000264474 |
| ENSP00000243924 | ENSP00000301607 |
| ENSP00000243924 | ENSP00000357731 |
| ENSP00000244007 | ENSP00000251864 |
| ENSP00000244007 | ENSP00000262995 |
| ENSP00000244007 | ENSP00000263409 |
| ENSP00000244007 | ENSP00000265175 |
| ENSP00000244007 | ENSP00000265963 |
| ENSP00000244007 | ENSP00000267101 |
| ENSP00000244007 | ENSP00000274376 |
| ENSP00000244007 | ENSP00000275635 |
| ENSP00000244007 | ENSP00000286364 |
| ENSP00000244007 | ENSP00000291582 |
| ENSP00000244007 | ENSP00000295408 |
| ENSP00000244007 | ENSP00000295987 |
| ENSP00000244007 | ENSP00000296440 |
| ENSP00000244007 | ENSP00000296474 |
| ENSP00000244007 | ENSP00000299440 |
| ENSP00000244007 | ENSP00000301280 |
| ENSP00000244007 | ENSP00000303507 |
| ENSP00000244007 | ENSP00000307305 |
| ENSP00000244007 | ENSP00000307889 |
| ENSP00000244007 | ENSP00000308774 |
| ENSP00000244007 | ENSP00000310561 |
| ENSP00000244007 | ENSP00000313829 |
| ENSP00000244007 | ENSP00000316460 |
| ENSP00000244007 | ENSP00000320340 |
| ENSP00000244007 | ENSP00000323424 |
| ENSP00000244007 | ENSP00000327145 |
| ENSP00000244007 | ENSP00000328203 |
| ENSP00000244007 | ENSP00000330393 |
| ENSP00000244007 | ENSP00000333568 |
| ENSP00000244007 | ENSP00000339495 |
| ENSP00000244007 | ENSP00000340944 |
| ENSP00000244007 | ENSP00000341189 |
| ENSP00000244007 | ENSP00000341658 |
| ENSP00000244007 | ENSP00000341680 |
| ENSP00000244007 | ENSP00000341692 |
| ENSP00000244007 | ENSP00000342793 |
| ENSP00000244007 | ENSP00000342905 |
| ENSP00000244007 | ENSP00000345731 |
| ENSP00000244007 | ENSP00000346566 |
| ENSP00000244007 | ENSP00000346839 |
| ENSP00000244007 | ENSP00000347942 |
| ENSP00000244007 | ENSP00000347979 |
| ENSP00000244007 | ENSP00000348685 |

|                 |                 |
|-----------------|-----------------|
| ENSP00000244007 | ENSP00000350297 |
| ENSP00000244007 | ENSP00000352608 |
| ENSP00000244007 | ENSP00000353375 |
| ENSP00000244007 | ENSP00000354119 |
| ENSP00000244007 | ENSP00000354207 |
| ENSP00000244007 | ENSP00000354341 |
| ENSP00000244007 | ENSP00000355865 |
| ENSP00000244007 | ENSP00000356595 |
| ENSP00000244007 | ENSP00000357182 |
| ENSP00000244007 | ENSP00000357494 |
| ENSP00000244007 | ENSP00000358033 |
| ENSP00000244007 | ENSP00000358081 |
| ENSP00000244007 | ENSP00000358301 |
| ENSP00000244007 | ENSP00000359489 |
| ENSP00000244007 | ENSP00000359552 |
| ENSP00000244007 | ENSP00000363649 |
| ENSP00000244007 | ENSP00000363763 |
| ENSP00000244007 | ENSP00000364898 |
| ENSP00000244007 | ENSP00000364912 |
| ENSP00000244007 | ENSP00000365016 |
| ENSP00000244007 | ENSP00000365891 |
| ENSP00000244007 | ENSP00000366603 |
| ENSP00000244007 | ENSP00000366936 |
| ENSP00000244007 | ENSP00000367787 |
| ENSP00000244007 | ENSP00000367972 |
| ENSP00000244007 | ENSP00000373700 |
| ENSP00000244007 | ENSP00000373952 |
| ENSP00000244007 | ENSP00000378306 |
| ENSP00000244007 | ENSP00000378338 |
| ENSP00000244007 | ENSP00000379158 |
| ENSP00000244007 | ENSP00000379946 |
| ENSP00000244007 | ENSP00000380921 |
| ENSP00000244007 | ENSP00000384675 |
| ENSP00000244007 | ENSP00000406091 |
| ENSP00000244051 | ENSP00000256398 |
| ENSP00000244051 | ENSP00000266126 |
| ENSP00000244051 | ENSP00000273064 |
| ENSP00000244051 | ENSP00000284957 |
| ENSP00000244051 | ENSP00000286428 |
| ENSP00000244051 | ENSP00000288532 |
| ENSP00000244051 | ENSP00000297338 |
| ENSP00000244051 | ENSP00000298937 |
| ENSP00000244051 | ENSP00000304292 |
| ENSP00000244051 | ENSP00000307272 |
| ENSP00000244051 | ENSP00000320566 |
| ENSP00000244051 | ENSP00000322957 |

|                 |                 |
|-----------------|-----------------|
| ENSP00000244051 | ENSP00000325677 |
| ENSP00000244051 | ENSP00000327716 |
| ENSP00000244051 | ENSP00000340836 |
| ENSP00000244051 | ENSP00000343190 |
| ENSP00000244051 | ENSP00000350967 |
| ENSP00000244051 | ENSP00000353622 |
| ENSP00000244051 | ENSP00000355890 |
| ENSP00000244051 | ENSP00000356405 |
| ENSP00000244051 | ENSP00000359939 |
| ENSP00000244051 | ENSP00000360676 |
| ENSP00000244051 | ENSP00000361642 |
| ENSP00000244051 | ENSP00000363205 |
| ENSP00000244051 | ENSP00000363779 |
| ENSP00000244051 | ENSP00000377665 |
| ENSP00000244051 | ENSP00000380982 |
| ENSP00000244051 | ENSP00000388320 |
| ENSP00000244051 | ENSP00000394869 |
| ENSP00000244051 | ENSP00000398597 |
| ENSP00000244051 | ENSP00000412922 |
| ENSP00000244174 | ENSP00000274520 |
| ENSP00000244174 | ENSP00000327647 |
| ENSP00000244204 | ENSP00000263925 |
| ENSP00000244204 | ENSP00000264029 |
| ENSP00000244204 | ENSP00000276590 |
| ENSP00000244204 | ENSP00000296490 |
| ENSP00000244204 | ENSP00000301329 |
| ENSP00000244204 | ENSP00000355812 |
| ENSP00000244204 | ENSP00000370410 |
| ENSP00000244204 | ENSP00000373566 |
| ENSP00000244204 | ENSP00000373715 |
| ENSP00000244217 | ENSP00000270776 |
| ENSP00000244217 | ENSP00000336927 |
| ENSP00000244217 | ENSP00000397009 |
| ENSP00000244227 | ENSP00000261973 |
| ENSP00000244227 | ENSP00000296702 |
| ENSP00000244227 | ENSP00000308546 |
| ENSP00000244227 | ENSP00000312981 |
| ENSP00000244227 | ENSP00000346986 |
| ENSP00000244227 | ENSP00000363313 |
| ENSP00000244227 | ENSP00000368801 |
| ENSP00000244227 | ENSP00000377262 |
| ENSP00000244227 | ENSP00000383059 |
| ENSP00000244230 | ENSP00000245539 |
| ENSP00000244230 | ENSP00000254037 |
| ENSP00000244230 | ENSP00000254803 |
| ENSP00000244230 | ENSP00000257829 |

|                 |                 |
|-----------------|-----------------|
| ENSP00000244230 | ENSP00000261637 |
| ENSP00000244230 | ENSP00000261708 |
| ENSP00000244230 | ENSP00000261741 |
| ENSP00000244230 | ENSP00000263657 |
| ENSP00000244230 | ENSP00000267425 |
| ENSP00000244230 | ENSP00000272521 |
| ENSP00000244230 | ENSP00000274606 |
| ENSP00000244230 | ENSP00000274849 |
| ENSP00000244230 | ENSP00000291576 |
| ENSP00000244230 | ENSP00000295373 |
| ENSP00000244230 | ENSP00000296792 |
| ENSP00000244230 | ENSP00000296802 |
| ENSP00000244230 | ENSP00000297579 |
| ENSP00000244230 | ENSP00000297990 |
| ENSP00000244230 | ENSP00000302896 |
| ENSP00000244230 | ENSP00000308179 |
| ENSP00000244230 | ENSP00000308332 |
| ENSP00000244230 | ENSP00000311028 |
| ENSP00000244230 | ENSP00000311135 |
| ENSP00000244230 | ENSP00000314193 |
| ENSP00000244230 | ENSP00000315674 |
| ENSP00000244230 | ENSP00000318646 |
| ENSP00000244230 | ENSP00000323302 |
| ENSP00000244230 | ENSP00000324122 |
| ENSP00000244230 | ENSP00000326981 |
| ENSP00000244230 | ENSP00000327179 |
| ENSP00000244230 | ENSP00000328854 |
| ENSP00000244230 | ENSP00000329466 |
| ENSP00000244230 | ENSP00000331907 |
| ENSP00000244230 | ENSP00000332340 |
| ENSP00000244230 | ENSP00000338703 |
| ENSP00000244230 | ENSP00000339095 |
| ENSP00000244230 | ENSP00000341885 |
| ENSP00000244230 | ENSP00000343557 |
| ENSP00000244230 | ENSP00000344393 |
| ENSP00000244230 | ENSP00000355471 |
| ENSP00000244230 | ENSP00000355541 |
| ENSP00000244230 | ENSP00000356134 |
| ENSP00000244230 | ENSP00000356520 |
| ENSP00000244230 | ENSP00000356903 |
| ENSP00000244230 | ENSP00000358812 |
| ENSP00000244230 | ENSP00000360031 |
| ENSP00000244230 | ENSP00000362105 |
| ENSP00000244230 | ENSP00000362744 |
| ENSP00000244230 | ENSP00000363313 |
| ENSP00000244230 | ENSP00000363642 |



|                 |                 |
|-----------------|-----------------|
| ENSP00000244230 | ENSP00000363746 |
| ENSP00000244230 | ENSP00000366557 |
| ENSP00000244230 | ENSP00000367439 |
| ENSP00000244230 | ENSP00000369757 |
| ENSP00000244230 | ENSP00000370589 |
| ENSP00000244230 | ENSP00000371169 |
| ENSP00000244230 | ENSP00000372695 |
| ENSP00000244230 | ENSP00000377944 |
| ENSP00000244230 | ENSP00000379888 |
| ENSP00000244230 | ENSP00000384048 |
| ENSP00000244230 | ENSP00000384302 |
| ENSP00000244230 | ENSP00000399454 |
| ENSP00000244230 | ENSP00000402869 |
| ENSP00000244230 | ENSP00000405614 |
| ENSP00000244230 | ENSP00000410396 |
| ENSP00000244230 | ENSP00000414321 |
| ENSP00000244241 | ENSP00000288167 |
| ENSP00000244241 | ENSP00000320936 |
| ENSP00000244289 | ENSP00000253339 |
| ENSP00000244289 | ENSP00000258424 |
| ENSP00000244289 | ENSP00000261813 |
| ENSP00000244289 | ENSP00000286428 |
| ENSP00000244289 | ENSP00000334188 |
| ENSP00000244289 | ENSP00000353622 |
| ENSP00000244333 | ENSP00000391490 |
| ENSP00000244426 | ENSP00000251038 |
| ENSP00000244426 | ENSP00000263228 |
| ENSP00000244426 | ENSP00000273480 |
| ENSP00000244426 | ENSP00000281543 |
| ENSP00000244426 | ENSP00000308897 |
| ENSP00000244426 | ENSP00000314004 |
| ENSP00000244426 | ENSP00000354739 |
| ENSP00000244426 | ENSP00000358147 |
| ENSP00000244426 | ENSP00000384109 |
| ENSP00000244496 | ENSP00000246802 |
| ENSP00000244496 | ENSP00000263657 |
| ENSP00000244496 | ENSP00000297579 |
| ENSP00000244496 | ENSP00000297990 |
| ENSP00000244496 | ENSP00000314348 |
| ENSP00000244496 | ENSP00000334100 |
| ENSP00000244496 | ENSP00000361092 |
| ENSP00000244496 | ENSP00000363313 |
| ENSP00000244496 | ENSP00000364320 |
| ENSP00000244496 | ENSP00000365025 |
| ENSP00000244520 | ENSP00000253108 |
| ENSP00000244520 | ENSP00000254193 |

|                 |                 |
|-----------------|-----------------|
| ENSP00000244520 | ENSP00000260129 |
| ENSP00000244520 | ENSP00000260257 |
| ENSP00000244520 | ENSP00000261973 |
| ENSP00000244520 | ENSP00000266079 |
| ENSP00000244520 | ENSP00000266735 |
| ENSP00000244520 | ENSP00000274680 |
| ENSP00000244520 | ENSP00000281828 |
| ENSP00000244520 | ENSP00000290158 |
| ENSP00000244520 | ENSP00000296702 |
| ENSP00000244520 | ENSP00000298288 |
| ENSP00000244520 | ENSP00000300413 |
| ENSP00000244520 | ENSP00000301740 |
| ENSP00000244520 | ENSP00000305958 |
| ENSP00000244520 | ENSP00000307863 |
| ENSP00000244520 | ENSP00000309166 |
| ENSP00000244520 | ENSP00000310448 |
| ENSP00000244520 | ENSP00000312753 |
| ENSP00000244520 | ENSP00000316109 |
| ENSP00000244520 | ENSP00000319169 |
| ENSP00000244520 | ENSP00000320309 |
| ENSP00000244520 | ENSP00000324203 |
| ENSP00000244520 | ENSP00000325690 |
| ENSP00000244520 | ENSP00000326261 |
| ENSP00000244520 | ENSP00000326806 |
| ENSP00000244520 | ENSP00000336712 |
| ENSP00000244520 | ENSP00000342374 |
| ENSP00000244520 | ENSP00000346986 |
| ENSP00000244520 | ENSP00000348010 |
| ENSP00000244520 | ENSP00000348107 |
| ENSP00000244520 | ENSP00000352308 |
| ENSP00000244520 | ENSP00000360876 |
| ENSP00000244520 | ENSP00000361577 |
| ENSP00000244520 | ENSP00000362936 |
| ENSP00000244520 | ENSP00000364289 |
| ENSP00000244520 | ENSP00000366607 |
| ENSP00000244520 | ENSP00000366829 |
| ENSP00000244520 | ENSP00000367498 |
| ENSP00000244520 | ENSP00000368801 |
| ENSP00000244520 | ENSP00000375863 |
| ENSP00000244520 | ENSP00000381031 |
| ENSP00000244520 | ENSP00000387170 |
| ENSP00000244520 | ENSP00000400591 |
| ENSP00000244520 | ENSP00000404121 |
| ENSP00000244520 | ENSP00000412566 |
| ENSP00000244571 | ENSP00000264705 |
| ENSP00000244571 | ENSP00000266126 |

|                 |                 |
|-----------------|-----------------|
| ENSP00000244571 | ENSP00000274473 |
| ENSP00000244571 | ENSP00000301585 |
| ENSP00000244571 | ENSP00000312042 |
| ENSP00000244571 | ENSP00000362993 |
| ENSP00000244571 | ENSP00000397598 |
| ENSP00000244709 | ENSP00000262629 |
| ENSP00000244711 | ENSP00000379607 |
| ENSP00000244741 | ENSP00000247970 |
| ENSP00000244741 | ENSP00000251968 |
| ENSP00000244741 | ENSP00000255465 |
| ENSP00000244741 | ENSP00000256442 |
| ENSP00000244741 | ENSP00000257430 |
| ENSP00000244741 | ENSP00000259469 |
| ENSP00000244741 | ENSP00000261402 |
| ENSP00000244741 | ENSP00000262320 |
| ENSP00000244741 | ENSP00000262367 |
| ENSP00000244741 | ENSP00000262643 |
| ENSP00000244741 | ENSP00000263036 |
| ENSP00000244741 | ENSP00000263201 |
| ENSP00000244741 | ENSP00000264717 |
| ENSP00000244741 | ENSP00000264731 |
| ENSP00000244741 | ENSP00000267023 |
| ENSP00000244741 | ENSP00000267163 |
| ENSP00000244741 | ENSP00000274255 |
| ENSP00000244741 | ENSP00000279281 |
| ENSP00000244741 | ENSP00000282058 |
| ENSP00000244741 | ENSP00000283033 |
| ENSP00000244741 | ENSP00000292180 |
| ENSP00000244741 | ENSP00000293362 |
| ENSP00000244741 | ENSP00000294360 |
| ENSP00000244741 | ENSP00000296930 |
| ENSP00000244741 | ENSP00000298832 |
| ENSP00000244741 | ENSP00000301634 |
| ENSP00000244741 | ENSP00000301764 |
| ENSP00000244741 | ENSP00000302111 |
| ENSP00000244741 | ENSP00000304226 |
| ENSP00000244741 | ENSP00000309103 |
| ENSP00000244741 | ENSP00000310129 |
| ENSP00000244741 | ENSP00000314949 |
| ENSP00000244741 | ENSP00000317891 |
| ENSP00000244741 | ENSP00000321203 |
| ENSP00000244741 | ENSP00000325120 |
| ENSP00000244741 | ENSP00000329357 |
| ENSP00000244741 | ENSP00000334061 |
| ENSP00000244741 | ENSP00000339527 |
| ENSP00000244741 | ENSP00000340995 |

|                 |                 |
|-----------------|-----------------|
| ENSP00000244741 | ENSP00000347733 |
| ENSP00000244741 | ENSP00000348551 |
| ENSP00000244741 | ENSP00000349543 |
| ENSP00000244741 | ENSP00000350283 |
| ENSP00000244741 | ENSP00000351908 |
| ENSP00000244741 | ENSP00000352257 |
| ENSP00000244741 | ENSP00000355759 |
| ENSP00000244741 | ENSP00000355958 |
| ENSP00000244741 | ENSP00000357748 |
| ENSP00000244741 | ENSP00000360025 |
| ENSP00000244741 | ENSP00000360532 |
| ENSP00000244741 | ENSP00000362029 |
| ENSP00000244741 | ENSP00000362608 |
| ENSP00000244741 | ENSP00000365025 |
| ENSP00000244741 | ENSP00000365439 |
| ENSP00000244741 | ENSP00000368438 |
| ENSP00000244741 | ENSP00000378180 |
| ENSP00000244741 | ENSP00000386165 |
| ENSP00000244741 | ENSP00000397530 |
| ENSP00000244741 | ENSP00000417281 |
| ENSP00000244745 | ENSP00000260130 |
| ENSP00000244745 | ENSP00000262315 |
| ENSP00000244745 | ENSP00000262367 |
| ENSP00000244745 | ENSP00000362068 |
| ENSP00000244745 | ENSP00000367406 |
| ENSP00000244745 | ENSP00000417281 |
| ENSP00000244763 | ENSP00000264883 |
| ENSP00000244763 | ENSP00000268379 |
| ENSP00000244763 | ENSP00000317331 |
| ENSP00000244763 | ENSP00000321853 |
| ENSP00000244763 | ENSP00000354876 |
| ENSP00000244763 | ENSP00000358563 |
| ENSP00000244763 | ENSP00000362255 |
| ENSP00000244769 | ENSP00000246672 |
| ENSP00000244769 | ENSP00000247087 |
| ENSP00000244769 | ENSP00000247665 |
| ENSP00000244769 | ENSP00000256854 |
| ENSP00000244769 | ENSP00000257940 |
| ENSP00000244769 | ENSP00000259632 |
| ENSP00000244769 | ENSP00000261507 |
| ENSP00000244769 | ENSP00000261523 |
| ENSP00000244769 | ENSP00000261647 |
| ENSP00000244769 | ENSP00000262375 |
| ENSP00000244769 | ENSP00000262630 |
| ENSP00000244769 | ENSP00000263205 |
| ENSP00000244769 | ENSP00000264160 |

|                 |                 |
|-----------------|-----------------|
| ENSP00000244769 | ENSP00000264335 |
| ENSP00000244769 | ENSP00000267064 |
| ENSP00000244769 | ENSP00000272367 |
| ENSP00000244769 | ENSP00000276646 |
| ENSP00000244769 | ENSP00000288098 |
| ENSP00000244769 | ENSP00000290949 |
| ENSP00000244769 | ENSP00000295888 |
| ENSP00000244769 | ENSP00000296327 |
| ENSP00000244769 | ENSP00000297788 |
| ENSP00000244769 | ENSP00000297954 |
| ENSP00000244769 | ENSP00000298852 |
| ENSP00000244769 | ENSP00000300291 |
| ENSP00000244769 | ENSP00000300417 |
| ENSP00000244769 | ENSP00000300574 |
| ENSP00000244769 | ENSP00000301887 |
| ENSP00000244769 | ENSP00000303252 |
| ENSP00000244769 | ENSP00000307023 |
| ENSP00000244769 | ENSP00000307863 |
| ENSP00000244769 | ENSP00000309117 |
| ENSP00000244769 | ENSP00000309629 |
| ENSP00000244769 | ENSP00000310561 |
| ENSP00000244769 | ENSP00000312222 |
| ENSP00000244769 | ENSP00000312624 |
| ENSP00000244769 | ENSP00000313059 |
| ENSP00000244769 | ENSP00000314733 |
| ENSP00000244769 | ENSP00000315112 |
| ENSP00000244769 | ENSP00000316842 |
| ENSP00000244769 | ENSP00000318298 |
| ENSP00000244769 | ENSP00000324422 |
| ENSP00000244769 | ENSP00000327509 |
| ENSP00000244769 | ENSP00000328103 |
| ENSP00000244769 | ENSP00000330408 |
| ENSP00000244769 | ENSP00000337926 |
| ENSP00000244769 | ENSP00000343535 |
| ENSP00000244769 | ENSP00000344609 |
| ENSP00000244769 | ENSP00000345216 |
| ENSP00000244769 | ENSP00000345793 |
| ENSP00000244769 | ENSP00000346412 |
| ENSP00000244769 | ENSP00000348069 |
| ENSP00000244769 | ENSP00000348273 |
| ENSP00000244769 | ENSP00000348551 |
| ENSP00000244769 | ENSP00000349078 |
| ENSP00000244769 | ENSP00000350078 |
| ENSP00000244769 | ENSP00000350094 |
| ENSP00000244769 | ENSP00000355028 |
| ENSP00000244769 | ENSP00000358092 |

|                 |                 |
|-----------------|-----------------|
| ENSP00000244769 | ENSP00000359444 |
| ENSP00000244769 | ENSP00000363095 |
| ENSP00000244769 | ENSP00000364912 |
| ENSP00000244769 | ENSP00000365175 |
| ENSP00000244769 | ENSP00000365747 |
| ENSP00000244769 | ENSP00000365840 |
| ENSP00000244769 | ENSP00000366843 |
| ENSP00000244769 | ENSP00000367086 |
| ENSP00000244769 | ENSP00000368698 |
| ENSP00000244769 | ENSP00000369372 |
| ENSP00000244769 | ENSP00000372445 |
| ENSP00000244769 | ENSP00000374529 |
| ENSP00000244769 | ENSP00000377862 |
| ENSP00000244769 | ENSP00000379093 |
| ENSP00000244769 | ENSP00000380271 |
| ENSP00000244769 | ENSP00000381693 |
| ENSP00000244769 | ENSP00000382815 |
| ENSP00000244769 | ENSP00000386520 |
| ENSP00000244769 | ENSP00000386759 |
| ENSP00000244769 | ENSP00000387477 |
| ENSP00000244769 | ENSP00000391723 |
| ENSP00000244769 | ENSP00000392466 |
| ENSP00000244769 | ENSP00000402935 |
| ENSP00000244769 | ENSP00000415836 |
| ENSP00000244930 | ENSP00000303070 |
| ENSP00000245046 | ENSP00000251038 |
| ENSP00000245046 | ENSP00000253457 |
| ENSP00000245046 | ENSP00000267750 |
| ENSP00000245046 | ENSP00000349887 |
| ENSP00000245046 | ENSP00000420608 |
| ENSP00000245121 | ENSP00000251968 |
| ENSP00000245121 | ENSP00000278412 |
| ENSP00000245121 | ENSP00000317468 |
| ENSP00000245121 | ENSP00000348442 |
| ENSP00000245121 | ENSP00000360412 |
| ENSP00000245121 | ENSP00000386227 |
| ENSP00000245157 | ENSP00000246062 |
| ENSP00000245157 | ENSP00000263734 |
| ENSP00000245157 | ENSP00000264499 |
| ENSP00000245157 | ENSP00000268057 |
| ENSP00000245157 | ENSP00000274353 |
| ENSP00000245157 | ENSP00000293362 |
| ENSP00000245157 | ENSP00000295240 |
| ENSP00000245157 | ENSP00000296135 |
| ENSP00000245157 | ENSP00000319062 |
| ENSP00000245157 | ENSP00000327077 |

|                 |                 |
|-----------------|-----------------|
| ENSP00000245157 | ENSP00000334100 |
| ENSP00000245157 | ENSP00000344456 |
| ENSP00000245157 | ENSP00000353701 |
| ENSP00000245157 | ENSP00000370031 |
| ENSP00000245206 | ENSP00000256398 |
| ENSP00000245206 | ENSP00000258742 |
| ENSP00000245206 | ENSP00000259607 |
| ENSP00000245206 | ENSP00000264029 |
| ENSP00000245206 | ENSP00000264705 |
| ENSP00000245206 | ENSP00000268251 |
| ENSP00000245206 | ENSP00000272902 |
| ENSP00000245206 | ENSP00000277865 |
| ENSP00000245206 | ENSP00000280346 |
| ENSP00000245206 | ENSP00000295899 |
| ENSP00000245206 | ENSP00000296490 |
| ENSP00000245206 | ENSP00000301329 |
| ENSP00000245206 | ENSP00000307900 |
| ENSP00000245206 | ENSP00000308610 |
| ENSP00000245206 | ENSP00000317159 |
| ENSP00000245206 | ENSP00000322180 |
| ENSP00000245206 | ENSP00000327070 |
| ENSP00000245206 | ENSP00000335304 |
| ENSP00000245206 | ENSP00000340019 |
| ENSP00000245206 | ENSP00000349022 |
| ENSP00000245206 | ENSP00000351947 |
| ENSP00000245206 | ENSP00000354558 |
| ENSP00000245206 | ENSP00000358413 |
| ENSP00000245206 | ENSP00000360286 |
| ENSP00000245206 | ENSP00000362463 |
| ENSP00000245206 | ENSP00000363779 |
| ENSP00000245206 | ENSP00000365775 |
| ENSP00000245206 | ENSP00000373509 |
| ENSP00000245206 | ENSP00000377527 |
| ENSP00000245206 | ENSP00000384675 |
| ENSP00000245206 | ENSP00000417190 |
| ENSP00000245222 | ENSP00000247225 |
| ENSP00000245222 | ENSP00000261596 |
| ENSP00000245222 | ENSP00000262518 |
| ENSP00000245222 | ENSP00000262554 |
| ENSP00000245222 | ENSP00000287295 |
| ENSP00000245222 | ENSP00000304226 |
| ENSP00000245222 | ENSP00000322218 |
| ENSP00000245222 | ENSP00000328079 |
| ENSP00000245222 | ENSP00000329419 |
| ENSP00000245222 | ENSP00000346155 |
| ENSP00000245222 | ENSP00000348577 |

|                 |                 |
|-----------------|-----------------|
| ENSP00000245222 | ENSP00000349959 |
| ENSP00000245222 | ENSP00000351908 |
| ENSP00000245222 | ENSP00000352219 |
| ENSP00000245222 | ENSP00000355205 |
| ENSP00000245222 | ENSP00000362298 |
| ENSP00000245222 | ENSP00000362751 |
| ENSP00000245222 | ENSP00000369860 |
| ENSP00000245222 | ENSP00000369862 |
| ENSP00000245222 | ENSP00000374213 |
| ENSP00000245222 | ENSP00000375986 |
| ENSP00000245222 | ENSP00000381932 |
| ENSP00000245222 | ENSP00000386759 |
| ENSP00000245222 | ENSP00000403397 |
| ENSP00000245441 | ENSP00000249636 |
| ENSP00000245441 | ENSP00000261700 |
| ENSP00000245441 | ENSP00000262320 |
| ENSP00000245441 | ENSP00000361027 |
| ENSP00000245441 | ENSP00000379607 |
| ENSP00000245479 | ENSP00000262315 |
| ENSP00000245479 | ENSP00000262367 |
| ENSP00000245479 | ENSP00000290158 |
| ENSP00000245479 | ENSP00000327048 |
| ENSP00000245479 | ENSP00000333188 |
| ENSP00000245479 | ENSP00000352514 |
| ENSP00000245479 | ENSP00000352522 |
| ENSP00000245479 | ENSP00000356331 |
| ENSP00000245479 | ENSP00000362068 |
| ENSP00000245479 | ENSP00000363193 |
| ENSP00000245479 | ENSP00000364912 |
| ENSP00000245479 | ENSP00000367406 |
| ENSP00000245479 | ENSP00000371711 |
| ENSP00000245539 | ENSP00000252543 |
| ENSP00000245539 | ENSP00000253099 |
| ENSP00000245539 | ENSP00000253788 |
| ENSP00000245539 | ENSP00000257829 |
| ENSP00000245539 | ENSP00000258455 |
| ENSP00000245539 | ENSP00000259469 |
| ENSP00000245539 | ENSP00000259569 |
| ENSP00000245539 | ENSP00000260102 |
| ENSP00000245539 | ENSP00000260443 |
| ENSP00000245539 | ENSP00000261015 |
| ENSP00000245539 | ENSP00000262584 |
| ENSP00000245539 | ENSP00000263629 |
| ENSP00000245539 | ENSP00000263657 |
| ENSP00000245539 | ENSP00000264515 |
| ENSP00000245539 | ENSP00000264995 |



|                 |                 |
|-----------------|-----------------|
| ENSP00000245539 | ENSP00000265100 |
| ENSP00000245539 | ENSP00000268206 |
| ENSP00000245539 | ENSP00000268661 |
| ENSP00000245539 | ENSP00000268802 |
| ENSP00000245539 | ENSP00000270625 |
| ENSP00000245539 | ENSP00000272418 |
| ENSP00000245539 | ENSP00000274606 |
| ENSP00000245539 | ENSP00000278572 |
| ENSP00000245539 | ENSP00000280557 |
| ENSP00000245539 | ENSP00000283109 |
| ENSP00000245539 | ENSP00000287038 |
| ENSP00000245539 | ENSP00000288937 |
| ENSP00000245539 | ENSP00000289371 |
| ENSP00000245539 | ENSP00000293860 |
| ENSP00000245539 | ENSP00000295491 |
| ENSP00000245539 | ENSP00000295930 |
| ENSP00000245539 | ENSP00000296674 |
| ENSP00000245539 | ENSP00000296792 |
| ENSP00000245539 | ENSP00000296802 |
| ENSP00000245539 | ENSP00000296805 |
| ENSP00000245539 | ENSP00000297908 |
| ENSP00000245539 | ENSP00000298283 |
| ENSP00000245539 | ENSP00000300151 |
| ENSP00000245539 | ENSP00000301585 |
| ENSP00000245539 | ENSP00000301729 |
| ENSP00000245539 | ENSP00000302896 |
| ENSP00000245539 | ENSP00000306548 |
| ENSP00000245539 | ENSP00000307567 |
| ENSP00000245539 | ENSP00000307889 |
| ENSP00000245539 | ENSP00000308897 |
| ENSP00000245539 | ENSP00000309334 |
| ENSP00000245539 | ENSP00000309433 |
| ENSP00000245539 | ENSP00000311028 |
| ENSP00000245539 | ENSP00000311430 |
| ENSP00000245539 | ENSP00000312042 |
| ENSP00000245539 | ENSP00000312735 |
| ENSP00000245539 | ENSP00000317376 |
| ENSP00000245539 | ENSP00000318646 |
| ENSP00000245539 | ENSP00000322419 |
| ENSP00000245539 | ENSP00000323856 |
| ENSP00000245539 | ENSP00000324122 |
| ENSP00000245539 | ENSP00000326981 |
| ENSP00000245539 | ENSP00000331019 |
| ENSP00000245539 | ENSP00000336702 |
| ENSP00000245539 | ENSP00000337127 |
| ENSP00000245539 | ENSP00000339095 |

|                 |                 |
|-----------------|-----------------|
| ENSP00000245539 | ENSP00000339795 |
| ENSP00000245539 | ENSP00000340896 |
| ENSP00000245539 | ENSP00000341692 |
| ENSP00000245539 | ENSP00000341885 |
| ENSP00000245539 | ENSP00000342889 |
| ENSP00000245539 | ENSP00000345156 |
| ENSP00000245539 | ENSP00000346015 |
| ENSP00000245539 | ENSP00000346022 |
| ENSP00000245539 | ENSP00000346027 |
| ENSP00000245539 | ENSP00000346037 |
| ENSP00000245539 | ENSP00000346050 |
| ENSP00000245539 | ENSP00000346067 |
| ENSP00000245539 | ENSP00000346453 |
| ENSP00000245539 | ENSP00000347087 |
| ENSP00000245539 | ENSP00000351596 |
| ENSP00000245539 | ENSP00000352706 |
| ENSP00000245539 | ENSP00000353575 |
| ENSP00000245539 | ENSP00000354522 |
| ENSP00000245539 | ENSP00000354525 |
| ENSP00000245539 | ENSP00000354739 |
| ENSP00000245539 | ENSP00000355471 |
| ENSP00000245539 | ENSP00000355890 |
| ENSP00000245539 | ENSP00000356134 |
| ENSP00000245539 | ENSP00000357480 |
| ENSP00000245539 | ENSP00000357748 |
| ENSP00000245539 | ENSP00000359345 |
| ENSP00000245539 | ENSP00000361076 |
| ENSP00000245539 | ENSP00000361206 |
| ENSP00000245539 | ENSP00000361465 |
| ENSP00000245539 | ENSP00000362036 |
| ENSP00000245539 | ENSP00000362208 |
| ENSP00000245539 | ENSP00000362688 |
| ENSP00000245539 | ENSP00000362744 |
| ENSP00000245539 | ENSP00000362993 |
| ENSP00000245539 | ENSP00000363018 |
| ENSP00000245539 | ENSP00000363250 |
| ENSP00000245539 | ENSP00000363308 |
| ENSP00000245539 | ENSP00000363676 |
| ENSP00000245539 | ENSP00000363944 |
| ENSP00000245539 | ENSP00000364320 |
| ENSP00000245539 | ENSP00000368790 |
| ENSP00000245539 | ENSP00000368927 |
| ENSP00000245539 | ENSP00000369757 |
| ENSP00000245539 | ENSP00000370589 |
| ENSP00000245539 | ENSP00000371236 |
| ENSP00000245539 | ENSP00000372445 |

|                 |                 |
|-----------------|-----------------|
| ENSP00000245539 | ENSP00000373404 |
| ENSP00000245539 | ENSP00000375730 |
| ENSP00000245539 | ENSP00000377640 |
| ENSP00000245539 | ENSP00000379339 |
| ENSP00000245539 | ENSP00000379888 |
| ENSP00000245539 | ENSP00000380156 |
| ENSP00000245539 | ENSP00000386717 |
| ENSP00000245539 | ENSP00000389103 |
| ENSP00000245539 | ENSP00000393241 |
| ENSP00000245539 | ENSP00000402338 |
| ENSP00000245539 | ENSP00000403175 |
| ENSP00000245539 | ENSP00000412583 |
| ENSP00000245539 | ENSP00000414321 |
| ENSP00000245539 | ENSP00000416110 |
| ENSP00000245539 | ENSP00000418661 |
| ENSP00000245539 | ENSP00000420714 |
| ENSP00000245543 | ENSP00000311202 |
| ENSP00000245543 | ENSP00000345107 |
| ENSP00000245543 | ENSP00000391774 |
| ENSP00000245544 | ENSP00000245923 |
| ENSP00000245544 | ENSP00000247970 |
| ENSP00000245544 | ENSP00000251038 |
| ENSP00000245544 | ENSP00000251074 |
| ENSP00000245544 | ENSP00000252115 |
| ENSP00000245544 | ENSP00000260327 |
| ENSP00000245544 | ENSP00000261396 |
| ENSP00000245544 | ENSP00000262077 |
| ENSP00000245544 | ENSP00000263576 |
| ENSP00000245544 | ENSP00000264883 |
| ENSP00000245544 | ENSP00000265388 |
| ENSP00000245544 | ENSP00000266079 |
| ENSP00000245544 | ENSP00000267484 |
| ENSP00000245544 | ENSP00000268482 |
| ENSP00000245544 | ENSP00000273130 |
| ENSP00000245544 | ENSP00000283195 |
| ENSP00000245544 | ENSP00000290231 |
| ENSP00000245544 | ENSP00000291688 |
| ENSP00000245544 | ENSP00000296786 |
| ENSP00000245544 | ENSP00000307525 |
| ENSP00000245544 | ENSP00000307863 |
| ENSP00000245544 | ENSP00000308622 |
| ENSP00000245544 | ENSP00000308944 |
| ENSP00000245544 | ENSP00000310590 |
| ENSP00000245544 | ENSP00000315035 |
| ENSP00000245544 | ENSP00000315379 |
| ENSP00000245544 | ENSP00000316032 |

|                 |                 |
|-----------------|-----------------|
| ENSP00000245544 | ENSP00000331817 |
| ENSP00000245544 | ENSP00000334675 |
| ENSP00000245544 | ENSP00000335321 |
| ENSP00000245544 | ENSP00000337838 |
| ENSP00000245544 | ENSP00000342262 |
| ENSP00000245544 | ENSP00000344106 |
| ENSP00000245544 | ENSP00000344460 |
| ENSP00000245544 | ENSP00000352400 |
| ENSP00000245544 | ENSP00000358478 |
| ENSP00000245544 | ENSP00000360286 |
| ENSP00000245544 | ENSP00000367721 |
| ENSP00000245544 | ENSP00000368959 |
| ENSP00000245544 | ENSP00000371155 |
| ENSP00000245544 | ENSP00000382779 |
| ENSP00000245544 | ENSP00000392601 |
| ENSP00000245564 | ENSP00000317334 |
| ENSP00000245615 | ENSP00000255389 |
| ENSP00000245615 | ENSP00000262134 |
| ENSP00000245615 | ENSP00000266095 |
| ENSP00000245615 | ENSP00000310551 |
| ENSP00000245615 | ENSP00000331288 |
| ENSP00000245615 | ENSP00000337463 |
| ENSP00000245615 | ENSP00000355963 |
| ENSP00000245615 | ENSP00000380184 |
| ENSP00000245615 | ENSP00000395863 |
| ENSP00000245615 | ENSP00000401287 |
| ENSP00000245680 | ENSP00000271375 |
| ENSP00000245680 | ENSP00000280346 |
| ENSP00000245680 | ENSP00000306106 |
| ENSP00000245680 | ENSP00000348877 |
| ENSP00000245680 | ENSP00000361057 |
| ENSP00000245680 | ENSP00000370414 |
| ENSP00000245680 | ENSP00000374467 |
| ENSP00000245796 | ENSP00000350409 |
| ENSP00000245796 | ENSP00000388872 |
| ENSP00000245816 | ENSP00000294053 |
| ENSP00000245816 | ENSP00000300107 |
| ENSP00000245816 | ENSP00000341213 |
| ENSP00000245816 | ENSP00000343392 |
| ENSP00000245816 | ENSP00000353826 |
| ENSP00000245817 | ENSP00000366729 |
| ENSP00000245838 | ENSP00000251038 |
| ENSP00000245838 | ENSP00000252115 |
| ENSP00000245838 | ENSP00000254442 |
| ENSP00000245838 | ENSP00000261531 |
| ENSP00000245838 | ENSP00000261600 |

|                 |                 |
|-----------------|-----------------|
| ENSP00000245838 | ENSP00000262030 |
| ENSP00000245838 | ENSP00000262715 |
| ENSP00000245838 | ENSP00000265990 |
| ENSP00000245838 | ENSP00000285398 |
| ENSP00000245838 | ENSP00000285873 |
| ENSP00000245838 | ENSP00000286428 |
| ENSP00000245838 | ENSP00000290158 |
| ENSP00000245838 | ENSP00000291688 |
| ENSP00000245838 | ENSP00000298281 |
| ENSP00000245838 | ENSP00000300574 |
| ENSP00000245838 | ENSP00000308944 |
| ENSP00000245838 | ENSP00000315791 |
| ENSP00000245838 | ENSP00000323858 |
| ENSP00000245838 | ENSP00000325376 |
| ENSP00000245838 | ENSP00000326531 |
| ENSP00000245838 | ENSP00000329466 |
| ENSP00000245838 | ENSP00000331817 |
| ENSP00000245838 | ENSP00000332444 |
| ENSP00000245838 | ENSP00000334675 |
| ENSP00000245838 | ENSP00000336712 |
| ENSP00000245838 | ENSP00000336752 |
| ENSP00000245838 | ENSP00000337839 |
| ENSP00000245838 | ENSP00000343701 |
| ENSP00000245838 | ENSP00000343741 |
| ENSP00000245838 | ENSP00000348010 |
| ENSP00000245838 | ENSP00000352738 |
| ENSP00000245838 | ENSP00000352820 |
| ENSP00000245838 | ENSP00000353059 |
| ENSP00000245838 | ENSP00000354522 |
| ENSP00000245838 | ENSP00000356470 |
| ENSP00000245838 | ENSP00000358478 |
| ENSP00000245838 | ENSP00000362441 |
| ENSP00000245838 | ENSP00000362900 |
| ENSP00000245838 | ENSP00000364289 |
| ENSP00000245838 | ENSP00000365811 |
| ENSP00000245838 | ENSP00000366953 |
| ENSP00000245838 | ENSP00000372023 |
| ENSP00000245838 | ENSP00000379607 |
| ENSP00000245838 | ENSP00000380969 |
| ENSP00000245838 | ENSP00000386520 |
| ENSP00000245838 | ENSP00000402515 |
| ENSP00000245903 | ENSP00000266557 |
| ENSP00000245912 | ENSP00000267169 |
| ENSP00000245912 | ENSP00000347948 |
| ENSP00000245912 | ENSP00000353332 |
| ENSP00000245912 | ENSP00000393693 |

|                 |                 |
|-----------------|-----------------|
| ENSP00000245912 | ENSP00000410481 |
| ENSP00000245919 | ENSP00000262367 |
| ENSP00000245919 | ENSP00000263036 |
| ENSP00000245919 | ENSP00000265372 |
| ENSP00000245919 | ENSP00000267101 |
| ENSP00000245919 | ENSP00000281437 |
| ENSP00000245919 | ENSP00000303315 |
| ENSP00000245919 | ENSP00000307235 |
| ENSP00000245919 | ENSP00000311005 |
| ENSP00000245919 | ENSP00000333633 |
| ENSP00000245919 | ENSP00000339449 |
| ENSP00000245919 | ENSP00000343745 |
| ENSP00000245919 | ENSP00000350359 |
| ENSP00000245919 | ENSP00000350708 |
| ENSP00000245919 | ENSP00000355866 |
| ENSP00000245919 | ENSP00000357494 |
| ENSP00000245919 | ENSP00000358854 |
| ENSP00000245919 | ENSP00000391944 |
| ENSP00000245923 | ENSP00000251775 |
| ENSP00000245923 | ENSP00000332979 |
| ENSP00000245923 | ENSP00000360644 |
| ENSP00000245923 | ENSP00000363349 |
| ENSP00000245923 | ENSP00000367910 |
| ENSP00000245923 | ENSP00000368959 |
| ENSP00000245934 | ENSP00000247970 |
| ENSP00000245934 | ENSP00000251038 |
| ENSP00000245934 | ENSP00000253048 |
| ENSP00000245934 | ENSP00000261531 |
| ENSP00000245934 | ENSP00000263956 |
| ENSP00000245934 | ENSP00000265073 |
| ENSP00000245934 | ENSP00000291386 |
| ENSP00000245934 | ENSP00000292476 |
| ENSP00000245934 | ENSP00000296328 |
| ENSP00000245934 | ENSP00000296490 |
| ENSP00000245934 | ENSP00000298281 |
| ENSP00000245934 | ENSP00000304704 |
| ENSP00000245934 | ENSP00000313953 |
| ENSP00000245934 | ENSP00000314348 |
| ENSP00000245934 | ENSP00000314949 |
| ENSP00000245934 | ENSP00000315791 |
| ENSP00000245934 | ENSP00000317872 |
| ENSP00000245934 | ENSP00000325377 |
| ENSP00000245934 | ENSP00000329466 |
| ENSP00000245934 | ENSP00000331369 |
| ENSP00000245934 | ENSP00000336752 |
| ENSP00000245934 | ENSP00000339353 |

|                 |                 |
|-----------------|-----------------|
| ENSP00000245934 | ENSP00000347184 |
| ENSP00000245934 | ENSP00000351947 |
| ENSP00000245934 | ENSP00000356405 |
| ENSP00000245934 | ENSP00000359976 |
| ENSP00000245934 | ENSP00000360532 |
| ENSP00000245934 | ENSP00000364794 |
| ENSP00000245934 | ENSP00000367406 |
| ENSP00000245934 | ENSP00000386161 |
| ENSP00000245960 | ENSP00000247970 |
| ENSP00000245960 | ENSP00000256398 |
| ENSP00000245960 | ENSP00000257789 |
| ENSP00000245960 | ENSP00000257934 |
| ENSP00000245960 | ENSP00000258418 |
| ENSP00000245960 | ENSP00000259569 |
| ENSP00000245960 | ENSP00000260363 |
| ENSP00000245960 | ENSP00000260731 |
| ENSP00000245960 | ENSP00000260810 |
| ENSP00000245960 | ENSP00000262300 |
| ENSP00000245960 | ENSP00000262367 |
| ENSP00000245960 | ENSP00000263181 |
| ENSP00000245960 | ENSP00000263208 |
| ENSP00000245960 | ENSP00000263657 |
| ENSP00000245960 | ENSP00000263708 |
| ENSP00000245960 | ENSP00000264335 |
| ENSP00000245960 | ENSP00000265148 |
| ENSP00000245960 | ENSP00000269216 |
| ENSP00000245960 | ENSP00000272065 |
| ENSP00000245960 | ENSP00000274289 |
| ENSP00000245960 | ENSP00000276014 |
| ENSP00000245960 | ENSP00000277541 |
| ENSP00000245960 | ENSP00000278616 |
| ENSP00000245960 | ENSP00000281171 |
| ENSP00000245960 | ENSP00000282549 |
| ENSP00000245960 | ENSP00000295951 |
| ENSP00000245960 | ENSP00000297338 |
| ENSP00000245960 | ENSP00000297431 |
| ENSP00000245960 | ENSP00000298048 |
| ENSP00000245960 | ENSP00000298532 |
| ENSP00000245960 | ENSP00000301364 |
| ENSP00000245960 | ENSP00000301764 |
| ENSP00000245960 | ENSP00000305790 |
| ENSP00000245960 | ENSP00000310649 |
| ENSP00000245960 | ENSP00000311005 |
| ENSP00000245960 | ENSP00000312150 |
| ENSP00000245960 | ENSP00000313420 |
| ENSP00000245960 | ENSP00000314792 |

|                 |                 |
|-----------------|-----------------|
| ENSP00000245960 | ENSP00000318884 |
| ENSP00000245960 | ENSP00000319169 |
| ENSP00000245960 | ENSP00000322957 |
| ENSP00000245960 | ENSP00000325120 |
| ENSP00000245960 | ENSP00000340944 |
| ENSP00000245960 | ENSP00000342307 |
| ENSP00000245960 | ENSP00000342381 |
| ENSP00000245960 | ENSP00000343741 |
| ENSP00000245960 | ENSP00000344456 |
| ENSP00000245960 | ENSP00000346453 |
| ENSP00000245960 | ENSP00000347087 |
| ENSP00000245960 | ENSP00000351113 |
| ENSP00000245960 | ENSP00000353344 |
| ENSP00000245960 | ENSP00000353904 |
| ENSP00000245960 | ENSP00000354558 |
| ENSP00000245960 | ENSP00000354916 |
| ENSP00000245960 | ENSP00000356319 |
| ENSP00000245960 | ENSP00000358423 |
| ENSP00000245960 | ENSP00000359206 |
| ENSP00000245960 | ENSP00000360532 |
| ENSP00000245960 | ENSP00000360621 |
| ENSP00000245960 | ENSP00000365025 |
| ENSP00000245960 | ENSP00000368976 |
| ENSP00000245960 | ENSP00000374566 |
| ENSP00000245960 | ENSP00000375986 |
| ENSP00000245960 | ENSP00000377047 |
| ENSP00000245960 | ENSP00000378306 |
| ENSP00000245960 | ENSP00000378350 |
| ENSP00000245960 | ENSP00000394794 |
| ENSP00000245960 | ENSP00000402084 |
| ENSP00000246006 | ENSP00000265023 |
| ENSP00000246006 | ENSP00000270176 |
| ENSP00000246006 | ENSP00000300574 |
| ENSP00000246006 | ENSP00000318298 |
| ENSP00000246006 | ENSP00000344666 |
| ENSP00000246006 | ENSP00000350512 |
| ENSP00000246041 | ENSP00000261558 |
| ENSP00000246062 | ENSP00000256854 |
| ENSP00000246062 | ENSP00000259477 |
| ENSP00000246062 | ENSP00000262519 |
| ENSP00000246062 | ENSP00000263208 |
| ENSP00000246062 | ENSP00000263657 |
| ENSP00000246062 | ENSP00000263857 |
| ENSP00000246062 | ENSP00000264161 |
| ENSP00000246062 | ENSP00000264380 |
| ENSP00000246062 | ENSP00000264499 |



|                 |                 |
|-----------------|-----------------|
| ENSP00000246062 | ENSP00000264705 |
| ENSP00000246062 | ENSP00000267197 |
| ENSP00000246062 | ENSP00000273398 |
| ENSP00000246062 | ENSP00000274242 |
| ENSP00000246062 | ENSP00000274680 |
| ENSP00000246062 | ENSP00000281828 |
| ENSP00000246062 | ENSP00000283109 |
| ENSP00000246062 | ENSP00000285021 |
| ENSP00000246062 | ENSP00000286428 |
| ENSP00000246062 | ENSP00000295066 |
| ENSP00000246062 | ENSP00000296273 |
| ENSP00000246062 | ENSP00000300648 |
| ENSP00000246062 | ENSP00000305682 |
| ENSP00000246062 | ENSP00000311200 |
| ENSP00000246062 | ENSP00000312778 |
| ENSP00000246062 | ENSP00000317334 |
| ENSP00000246062 | ENSP00000319062 |
| ENSP00000246062 | ENSP00000320309 |
| ENSP00000246062 | ENSP00000320648 |
| ENSP00000246062 | ENSP00000325448 |
| ENSP00000246062 | ENSP00000327070 |
| ENSP00000246062 | ENSP00000327959 |
| ENSP00000246062 | ENSP00000329558 |
| ENSP00000246062 | ENSP00000334188 |
| ENSP00000246062 | ENSP00000338093 |
| ENSP00000246062 | ENSP00000340896 |
| ENSP00000246062 | ENSP00000346022 |
| ENSP00000246062 | ENSP00000346566 |
| ENSP00000246062 | ENSP00000353098 |
| ENSP00000246062 | ENSP00000355890 |
| ENSP00000246062 | ENSP00000355958 |
| ENSP00000246062 | ENSP00000357051 |
| ENSP00000246062 | ENSP00000357887 |
| ENSP00000246062 | ENSP00000358140 |
| ENSP00000246062 | ENSP00000358854 |
| ENSP00000246062 | ENSP00000360286 |
| ENSP00000246062 | ENSP00000360412 |
| ENSP00000246062 | ENSP00000360473 |
| ENSP00000246062 | ENSP00000361287 |
| ENSP00000246062 | ENSP00000361465 |
| ENSP00000246062 | ENSP00000362576 |
| ENSP00000246062 | ENSP00000363676 |
| ENSP00000246062 | ENSP00000363734 |
| ENSP00000246062 | ENSP00000367498 |
| ENSP00000246062 | ENSP00000369757 |
| ENSP00000246062 | ENSP00000371888 |

|                 |                 |
|-----------------|-----------------|
| ENSP00000246062 | ENSP00000372694 |
| ENSP00000246062 | ENSP00000376946 |
| ENSP00000246062 | ENSP00000379908 |
| ENSP00000246062 | ENSP00000382595 |
| ENSP00000246062 | ENSP00000403852 |
| ENSP00000246062 | ENSP00000412319 |
| ENSP00000246062 | ENSP00000415678 |
| ENSP00000246090 | ENSP00000259750 |
| ENSP00000246090 | ENSP00000265881 |
| ENSP00000246090 | ENSP00000342381 |
| ENSP00000246112 | ENSP00000311825 |
| ENSP00000246112 | ENSP00000312385 |
| ENSP00000246112 | ENSP00000345156 |
| ENSP00000246112 | ENSP00000359384 |
| ENSP00000246112 | ENSP00000359392 |
| ENSP00000246112 | ENSP00000414750 |
| ENSP00000246117 | ENSP00000347948 |
| ENSP00000246151 | ENSP00000262966 |
| ENSP00000246151 | ENSP00000310129 |
| ENSP00000246151 | ENSP00000418734 |
| ENSP00000246166 | ENSP00000248673 |
| ENSP00000246166 | ENSP00000263997 |
| ENSP00000246166 | ENSP00000273398 |
| ENSP00000246166 | ENSP00000282388 |
| ENSP00000246166 | ENSP00000287936 |
| ENSP00000246166 | ENSP00000288602 |
| ENSP00000246166 | ENSP00000296509 |
| ENSP00000246166 | ENSP00000297316 |
| ENSP00000246166 | ENSP00000303423 |
| ENSP00000246166 | ENSP00000320488 |
| ENSP00000246166 | ENSP00000334061 |
| ENSP00000246166 | ENSP00000342032 |
| ENSP00000246166 | ENSP00000349078 |
| ENSP00000246166 | ENSP00000350633 |
| ENSP00000246166 | ENSP00000355922 |
| ENSP00000246166 | ENSP00000362171 |
| ENSP00000246166 | ENSP00000375986 |
| ENSP00000246166 | ENSP00000378503 |
| ENSP00000246190 | ENSP00000284981 |
| ENSP00000246190 | ENSP00000364289 |
| ENSP00000246337 | ENSP00000278616 |
| ENSP00000246337 | ENSP00000278715 |
| ENSP00000246337 | ENSP00000280557 |
| ENSP00000246337 | ENSP00000328079 |
| ENSP00000246337 | ENSP00000329419 |
| ENSP00000246337 | ENSP00000350967 |

|                 |                 |
|-----------------|-----------------|
| ENSP00000246337 | ENSP00000354125 |
| ENSP00000246337 | ENSP00000364119 |
| ENSP00000246337 | ENSP00000370258 |
| ENSP00000246337 | ENSP00000386284 |
| ENSP00000246337 | ENSP00000417229 |
| ENSP00000246532 | ENSP00000344860 |
| ENSP00000246548 | ENSP00000247970 |
| ENSP00000246548 | ENSP00000249636 |
| ENSP00000246548 | ENSP00000250113 |
| ENSP00000246548 | ENSP00000256398 |
| ENSP00000246548 | ENSP00000259050 |
| ENSP00000246548 | ENSP00000261584 |
| ENSP00000246548 | ENSP00000262133 |
| ENSP00000246548 | ENSP00000263202 |
| ENSP00000246548 | ENSP00000265990 |
| ENSP00000246548 | ENSP00000267163 |
| ENSP00000246548 | ENSP00000270225 |
| ENSP00000246548 | ENSP00000273067 |
| ENSP00000246548 | ENSP00000274140 |
| ENSP00000246548 | ENSP00000283195 |
| ENSP00000246548 | ENSP00000286428 |
| ENSP00000246548 | ENSP00000288532 |
| ENSP00000246548 | ENSP00000300738 |
| ENSP00000246548 | ENSP00000301788 |
| ENSP00000246548 | ENSP00000309141 |
| ENSP00000246548 | ENSP00000311496 |
| ENSP00000246548 | ENSP00000317087 |
| ENSP00000246548 | ENSP00000322242 |
| ENSP00000246548 | ENSP00000323050 |
| ENSP00000246548 | ENSP00000323439 |
| ENSP00000246548 | ENSP00000330343 |
| ENSP00000246548 | ENSP00000334474 |
| ENSP00000246548 | ENSP00000338413 |
| ENSP00000246548 | ENSP00000338862 |
| ENSP00000246548 | ENSP00000340278 |
| ENSP00000246548 | ENSP00000343023 |
| ENSP00000246548 | ENSP00000346566 |
| ENSP00000246548 | ENSP00000350283 |
| ENSP00000246548 | ENSP00000350708 |
| ENSP00000246548 | ENSP00000354742 |
| ENSP00000246548 | ENSP00000354957 |
| ENSP00000246548 | ENSP00000359939 |
| ENSP00000246548 | ENSP00000363779 |
| ENSP00000246548 | ENSP00000365773 |
| ENSP00000246548 | ENSP00000366434 |
| ENSP00000246548 | ENSP00000377655 |

|                 |                 |
|-----------------|-----------------|
| ENSP00000246548 | ENSP00000402527 |
| ENSP00000246548 | ENSP00000403817 |
| ENSP00000246551 | ENSP00000262629 |
| ENSP00000246657 | ENSP00000259607 |
| ENSP00000246662 | ENSP00000257430 |
| ENSP00000246662 | ENSP00000259075 |
| ENSP00000246662 | ENSP00000295897 |
| ENSP00000246662 | ENSP00000362424 |
| ENSP00000246672 | ENSP00000262854 |
| ENSP00000246672 | ENSP00000266744 |
| ENSP00000246672 | ENSP00000306100 |
| ENSP00000246672 | ENSP00000311825 |
| ENSP00000246672 | ENSP00000314420 |
| ENSP00000246672 | ENSP00000349892 |
| ENSP00000246672 | ENSP00000372459 |
| ENSP00000246794 | ENSP00000345530 |
| ENSP00000246802 | ENSP00000252037 |
| ENSP00000246802 | ENSP00000254037 |
| ENSP00000246802 | ENSP00000254940 |
| ENSP00000246802 | ENSP00000257177 |
| ENSP00000246802 | ENSP00000262265 |
| ENSP00000246802 | ENSP00000264230 |
| ENSP00000246802 | ENSP00000264670 |
| ENSP00000246802 | ENSP00000264995 |
| ENSP00000246802 | ENSP00000265245 |
| ENSP00000246802 | ENSP00000267425 |
| ENSP00000246802 | ENSP00000267430 |
| ENSP00000246802 | ENSP00000268661 |
| ENSP00000246802 | ENSP00000280350 |
| ENSP00000246802 | ENSP00000294008 |
| ENSP00000246802 | ENSP00000296411 |
| ENSP00000246802 | ENSP00000296783 |
| ENSP00000246802 | ENSP00000297990 |
| ENSP00000246802 | ENSP00000298292 |
| ENSP00000246802 | ENSP00000298746 |
| ENSP00000246802 | ENSP00000301364 |
| ENSP00000246802 | ENSP00000302886 |
| ENSP00000246802 | ENSP00000307853 |
| ENSP00000246802 | ENSP00000310520 |
| ENSP00000246802 | ENSP00000317232 |
| ENSP00000246802 | ENSP00000318646 |
| ENSP00000246802 | ENSP00000324122 |
| ENSP00000246802 | ENSP00000325312 |
| ENSP00000246802 | ENSP00000326806 |
| ENSP00000246802 | ENSP00000329466 |
| ENSP00000246802 | ENSP00000333376 |

|                 |                 |
|-----------------|-----------------|
| ENSP00000246802 | ENSP00000338573 |
| ENSP00000246802 | ENSP00000339095 |
| ENSP00000246802 | ENSP00000345530 |
| ENSP00000246802 | ENSP00000346566 |
| ENSP00000246802 | ENSP00000348596 |
| ENSP00000246802 | ENSP00000352021 |
| ENSP00000246802 | ENSP00000354040 |
| ENSP00000246802 | ENSP00000358019 |
| ENSP00000246802 | ENSP00000358563 |
| ENSP00000246802 | ENSP00000361982 |
| ENSP00000246802 | ENSP00000362153 |
| ENSP00000246802 | ENSP00000364293 |
| ENSP00000246802 | ENSP00000364543 |
| ENSP00000246802 | ENSP00000365806 |
| ENSP00000246802 | ENSP00000366135 |
| ENSP00000246802 | ENSP00000366434 |
| ENSP00000246802 | ENSP00000366519 |
| ENSP00000246802 | ENSP00000370589 |
| ENSP00000246802 | ENSP00000371201 |
| ENSP00000246802 | ENSP00000372827 |
| ENSP00000246802 | ENSP00000373090 |
| ENSP00000246802 | ENSP00000377793 |
| ENSP00000246802 | ENSP00000382392 |
| ENSP00000246802 | ENSP00000388464 |
| ENSP00000246802 | ENSP00000394290 |
| ENSP00000246802 | ENSP00000394400 |
| ENSP00000246802 | ENSP00000399530 |
| ENSP00000246802 | ENSP00000400626 |
| ENSP00000246802 | ENSP00000402338 |
| ENSP00000246802 | ENSP00000403576 |
| ENSP00000246802 | ENSP00000409074 |
| ENSP00000246802 | ENSP00000409367 |
| ENSP00000246802 | ENSP00000411162 |
| ENSP00000246802 | ENSP00000412310 |
| ENSP00000246802 | ENSP00000413152 |
| ENSP00000246802 | ENSP00000417281 |
| ENSP00000246802 | ENSP00000419740 |
| ENSP00000246868 | ENSP00000251038 |
| ENSP00000246868 | ENSP00000252115 |
| ENSP00000246868 | ENSP00000254940 |
| ENSP00000246868 | ENSP00000264995 |
| ENSP00000246868 | ENSP00000268206 |
| ENSP00000246868 | ENSP00000268661 |
| ENSP00000246868 | ENSP00000276603 |
| ENSP00000246868 | ENSP00000296805 |
| ENSP00000246868 | ENSP00000300086 |

|                 |                 |
|-----------------|-----------------|
| ENSP00000246868 | ENSP00000331817 |
| ENSP00000246868 | ENSP00000350011 |
| ENSP00000246868 | ENSP00000350249 |
| ENSP00000246868 | ENSP00000353073 |
| ENSP00000246868 | ENSP00000358812 |
| ENSP00000246868 | ENSP00000363308 |
| ENSP00000246868 | ENSP00000363559 |
| ENSP00000246868 | ENSP00000366557 |
| ENSP00000246868 | ENSP00000377496 |
| ENSP00000246891 | ENSP00000259235 |
| ENSP00000246891 | ENSP00000259750 |
| ENSP00000246891 | ENSP00000314733 |
| ENSP00000246891 | ENSP00000339353 |
| ENSP00000246891 | ENSP00000346340 |
| ENSP00000246891 | ENSP00000350512 |
| ENSP00000246891 | ENSP00000369257 |
| ENSP00000246895 | ENSP00000302021 |
| ENSP00000246895 | ENSP00000358747 |
| ENSP00000246895 | ENSP00000382485 |
| ENSP00000246896 | ENSP00000302021 |
| ENSP00000246912 | ENSP00000312834 |
| ENSP00000246912 | ENSP00000320886 |
| ENSP00000246912 | ENSP00000347592 |
| ENSP00000246912 | ENSP00000382562 |
| ENSP00000247001 | ENSP00000307863 |
| ENSP00000247001 | ENSP00000366829 |
| ENSP00000247001 | ENSP00000369218 |
| ENSP00000247005 | ENSP00000297261 |
| ENSP00000247005 | ENSP00000332353 |
| ENSP00000247026 | ENSP00000355050 |
| ENSP00000247026 | ENSP00000361616 |
| ENSP00000247026 | ENSP00000394085 |
| ENSP00000247087 | ENSP00000384490 |
| ENSP00000247161 | ENSP00000262367 |
| ENSP00000247161 | ENSP00000265354 |
| ENSP00000247161 | ENSP00000305422 |
| ENSP00000247161 | ENSP00000306245 |
| ENSP00000247161 | ENSP00000310094 |
| ENSP00000247161 | ENSP00000315702 |
| ENSP00000247161 | ENSP00000338345 |
| ENSP00000247161 | ENSP00000350283 |
| ENSP00000247161 | ENSP00000363804 |
| ENSP00000247161 | ENSP00000381793 |
| ENSP00000247178 | ENSP00000262039 |
| ENSP00000247178 | ENSP00000277746 |
| ENSP00000247178 | ENSP00000336927 |

|                 |                 |
|-----------------|-----------------|
| ENSP00000247178 | ENSP00000349205 |
| ENSP00000247178 | ENSP00000355231 |
| ENSP00000247191 | ENSP00000262294 |
| ENSP00000247191 | ENSP00000266087 |
| ENSP00000247191 | ENSP00000359206 |
| ENSP00000247219 | ENSP00000247843 |
| ENSP00000247219 | ENSP00000250615 |
| ENSP00000247219 | ENSP00000251089 |
| ENSP00000247219 | ENSP00000254900 |
| ENSP00000247219 | ENSP00000259569 |
| ENSP00000247219 | ENSP00000261951 |
| ENSP00000247219 | ENSP00000262608 |
| ENSP00000247219 | ENSP00000262982 |
| ENSP00000247219 | ENSP00000263121 |
| ENSP00000247219 | ENSP00000264193 |
| ENSP00000247219 | ENSP00000272645 |
| ENSP00000247219 | ENSP00000274606 |
| ENSP00000247219 | ENSP00000280614 |
| ENSP00000247219 | ENSP00000287878 |
| ENSP00000247219 | ENSP00000293406 |
| ENSP00000247219 | ENSP00000295321 |
| ENSP00000247219 | ENSP00000298852 |
| ENSP00000247219 | ENSP00000298937 |
| ENSP00000247219 | ENSP00000299767 |
| ENSP00000247219 | ENSP00000301788 |
| ENSP00000247219 | ENSP00000303088 |
| ENSP00000247219 | ENSP00000304169 |
| ENSP00000247219 | ENSP00000306983 |
| ENSP00000247219 | ENSP00000307684 |
| ENSP00000247219 | ENSP00000309142 |
| ENSP00000247219 | ENSP00000320949 |
| ENSP00000247219 | ENSP00000328690 |
| ENSP00000247219 | ENSP00000329933 |
| ENSP00000247219 | ENSP00000336702 |
| ENSP00000247219 | ENSP00000340271 |
| ENSP00000247219 | ENSP00000341805 |
| ENSP00000247219 | ENSP00000345702 |
| ENSP00000247219 | ENSP00000346022 |
| ENSP00000247219 | ENSP00000346453 |
| ENSP00000247219 | ENSP00000347345 |
| ENSP00000247219 | ENSP00000347733 |
| ENSP00000247219 | ENSP00000349213 |
| ENSP00000247219 | ENSP00000350708 |
| ENSP00000247219 | ENSP00000351575 |
| ENSP00000247219 | ENSP00000354742 |
| ENSP00000247219 | ENSP00000356405 |

|                 |                 |
|-----------------|-----------------|
| ENSP00000247219 | ENSP00000357051 |
| ENSP00000247219 | ENSP00000357602 |
| ENSP00000247219 | ENSP00000360515 |
| ENSP00000247219 | ENSP00000361465 |
| ENSP00000247219 | ENSP00000364289 |
| ENSP00000247219 | ENSP00000365025 |
| ENSP00000247219 | ENSP00000369695 |
| ENSP00000247219 | ENSP00000369716 |
| ENSP00000247219 | ENSP00000370517 |
| ENSP00000247219 | ENSP00000374280 |
| ENSP00000247219 | ENSP00000377747 |
| ENSP00000247219 | ENSP00000377865 |
| ENSP00000247219 | ENSP00000386992 |
| ENSP00000247219 | ENSP00000392617 |
| ENSP00000247219 | ENSP00000396620 |
| ENSP00000247219 | ENSP00000396937 |
| ENSP00000247219 | ENSP00000414321 |
| ENSP00000247225 | ENSP00000258052 |
| ENSP00000247225 | ENSP00000262554 |
| ENSP00000247225 | ENSP00000326869 |
| ENSP00000247225 | ENSP00000358831 |
| ENSP00000247225 | ENSP00000362298 |
| ENSP00000247271 | ENSP00000258418 |
| ENSP00000247291 | ENSP00000350854 |
| ENSP00000247584 | ENSP00000262643 |
| ENSP00000247584 | ENSP00000341243 |
| ENSP00000247584 | ENSP00000352514 |
| ENSP00000247584 | ENSP00000364912 |
| ENSP00000247584 | ENSP00000365435 |
| ENSP00000247655 | ENSP00000251038 |
| ENSP00000247655 | ENSP00000258424 |
| ENSP00000247655 | ENSP00000268379 |
| ENSP00000247655 | ENSP00000287022 |
| ENSP00000247655 | ENSP00000297564 |
| ENSP00000247655 | ENSP00000307786 |
| ENSP00000247655 | ENSP00000309565 |
| ENSP00000247655 | ENSP00000317159 |
| ENSP00000247655 | ENSP00000317780 |
| ENSP00000247655 | ENSP00000332887 |
| ENSP00000247655 | ENSP00000354499 |
| ENSP00000247655 | ENSP00000354554 |
| ENSP00000247655 | ENSP00000354876 |
| ENSP00000247655 | ENSP00000354982 |
| ENSP00000247655 | ENSP00000355572 |
| ENSP00000247655 | ENSP00000367934 |
| ENSP00000247655 | ENSP00000387262 |



|                 |                 |
|-----------------|-----------------|
| ENSP00000247665 | ENSP00000267415 |
| ENSP00000247815 | ENSP00000254719 |
| ENSP00000247815 | ENSP00000255078 |
| ENSP00000247815 | ENSP00000262794 |
| ENSP00000247815 | ENSP00000262803 |
| ENSP00000247815 | ENSP00000264926 |
| ENSP00000247815 | ENSP00000265465 |
| ENSP00000247815 | ENSP00000267430 |
| ENSP00000247815 | ENSP00000288774 |
| ENSP00000247815 | ENSP00000298139 |
| ENSP00000247815 | ENSP00000300738 |
| ENSP00000247815 | ENSP00000306561 |
| ENSP00000247815 | ENSP00000309572 |
| ENSP00000247815 | ENSP00000311873 |
| ENSP00000247815 | ENSP00000317636 |
| ENSP00000247815 | ENSP00000318977 |
| ENSP00000247815 | ENSP00000321636 |
| ENSP00000247815 | ENSP00000322180 |
| ENSP00000247815 | ENSP00000325863 |
| ENSP00000247815 | ENSP00000330343 |
| ENSP00000247815 | ENSP00000343392 |
| ENSP00000247815 | ENSP00000347232 |
| ENSP00000247815 | ENSP00000347978 |
| ENSP00000247815 | ENSP00000351284 |
| ENSP00000247815 | ENSP00000351524 |
| ENSP00000247815 | ENSP00000351885 |
| ENSP00000247815 | ENSP00000352257 |
| ENSP00000247815 | ENSP00000360817 |
| ENSP00000247815 | ENSP00000362135 |
| ENSP00000247815 | ENSP00000366135 |
| ENSP00000247815 | ENSP00000368349 |
| ENSP00000247815 | ENSP00000368438 |
| ENSP00000247815 | ENSP00000369335 |
| ENSP00000247815 | ENSP00000406490 |
| ENSP00000247843 | ENSP00000251038 |
| ENSP00000247843 | ENSP00000252996 |
| ENSP00000247843 | ENSP00000254803 |
| ENSP00000247843 | ENSP00000254900 |
| ENSP00000247843 | ENSP00000255764 |
| ENSP00000247843 | ENSP00000256379 |
| ENSP00000247843 | ENSP00000258428 |
| ENSP00000247843 | ENSP00000259569 |
| ENSP00000247843 | ENSP00000261813 |
| ENSP00000247843 | ENSP00000262518 |
| ENSP00000247843 | ENSP00000262608 |
| ENSP00000247843 | ENSP00000263062 |

|                 |                 |
|-----------------|-----------------|
| ENSP00000247843 | ENSP00000263121 |
| ENSP00000247843 | ENSP00000263228 |
| ENSP00000247843 | ENSP00000263377 |
| ENSP00000247843 | ENSP00000263795 |
| ENSP00000247843 | ENSP00000263974 |
| ENSP00000247843 | ENSP00000264183 |
| ENSP00000247843 | ENSP00000264515 |
| ENSP00000247843 | ENSP00000264926 |
| ENSP00000247843 | ENSP00000265990 |
| ENSP00000247843 | ENSP00000267064 |
| ENSP00000247843 | ENSP00000272645 |
| ENSP00000247843 | ENSP00000276072 |
| ENSP00000247843 | ENSP00000278616 |
| ENSP00000247843 | ENSP00000281043 |
| ENSP00000247843 | ENSP00000282892 |
| ENSP00000247843 | ENSP00000283882 |
| ENSP00000247843 | ENSP00000286317 |
| ENSP00000247843 | ENSP00000286428 |
| ENSP00000247843 | ENSP00000287598 |
| ENSP00000247843 | ENSP00000291688 |
| ENSP00000247843 | ENSP00000293860 |
| ENSP00000247843 | ENSP00000294168 |
| ENSP00000247843 | ENSP00000295066 |
| ENSP00000247843 | ENSP00000296509 |
| ENSP00000247843 | ENSP00000298532 |
| ENSP00000247843 | ENSP00000299424 |
| ENSP00000247843 | ENSP00000299601 |
| ENSP00000247843 | ENSP00000300107 |
| ENSP00000247843 | ENSP00000301788 |
| ENSP00000247843 | ENSP00000302478 |
| ENSP00000247843 | ENSP00000302530 |
| ENSP00000247843 | ENSP00000302955 |
| ENSP00000247843 | ENSP00000303315 |
| ENSP00000247843 | ENSP00000304370 |
| ENSP00000247843 | ENSP00000304593 |
| ENSP00000247843 | ENSP00000307684 |
| ENSP00000247843 | ENSP00000308944 |
| ENSP00000247843 | ENSP00000309555 |
| ENSP00000247843 | ENSP00000310596 |
| ENSP00000247843 | ENSP00000311083 |
| ENSP00000247843 | ENSP00000312244 |
| ENSP00000247843 | ENSP00000312697 |
| ENSP00000247843 | ENSP00000312735 |
| ENSP00000247843 | ENSP00000316114 |
| ENSP00000247843 | ENSP00000320566 |
| ENSP00000247843 | ENSP00000322180 |

|                 |                 |
|-----------------|-----------------|
| ENSP00000247843 | ENSP00000322579 |
| ENSP00000247843 | ENSP00000323720 |
| ENSP00000247843 | ENSP00000324274 |
| ENSP00000247843 | ENSP00000324444 |
| ENSP00000247843 | ENSP00000325677 |
| ENSP00000247843 | ENSP00000326806 |
| ENSP00000247843 | ENSP00000331310 |
| ENSP00000247843 | ENSP00000334148 |
| ENSP00000247843 | ENSP00000334188 |
| ENSP00000247843 | ENSP00000334280 |
| ENSP00000247843 | ENSP00000336606 |
| ENSP00000247843 | ENSP00000336842 |
| ENSP00000247843 | ENSP00000336868 |
| ENSP00000247843 | ENSP00000340271 |
| ENSP00000247843 | ENSP00000340823 |
| ENSP00000247843 | ENSP00000340896 |
| ENSP00000247843 | ENSP00000342889 |
| ENSP00000247843 | ENSP00000343741 |
| ENSP00000247843 | ENSP00000344537 |
| ENSP00000247843 | ENSP00000346453 |
| ENSP00000247843 | ENSP00000347345 |
| ENSP00000247843 | ENSP00000347602 |
| ENSP00000247843 | ENSP00000347719 |
| ENSP00000247843 | ENSP00000347733 |
| ENSP00000247843 | ENSP00000348551 |
| ENSP00000247843 | ENSP00000349049 |
| ENSP00000247843 | ENSP00000350032 |
| ENSP00000247843 | ENSP00000351250 |
| ENSP00000247843 | ENSP00000352738 |
| ENSP00000247843 | ENSP00000353622 |
| ENSP00000247843 | ENSP00000353793 |
| ENSP00000247843 | ENSP00000354633 |
| ENSP00000247843 | ENSP00000355051 |
| ENSP00000247843 | ENSP00000355205 |
| ENSP00000247843 | ENSP00000355560 |
| ENSP00000247843 | ENSP00000355720 |
| ENSP00000247843 | ENSP00000356405 |
| ENSP00000247843 | ENSP00000356989 |
| ENSP00000247843 | ENSP00000357887 |
| ENSP00000247843 | ENSP00000358478 |
| ENSP00000247843 | ENSP00000358854 |
| ENSP00000247843 | ENSP00000359290 |
| ENSP00000247843 | ENSP00000359518 |
| ENSP00000247843 | ENSP00000359531 |
| ENSP00000247843 | ENSP00000359837 |
| ENSP00000247843 | ENSP00000360473 |

|                 |                 |
|-----------------|-----------------|
| ENSP00000247843 | ENSP00000360515 |
| ENSP00000247843 | ENSP00000360532 |
| ENSP00000247843 | ENSP00000360621 |
| ENSP00000247843 | ENSP00000361310 |
| ENSP00000247843 | ENSP00000361465 |
| ENSP00000247843 | ENSP00000361998 |
| ENSP00000247843 | ENSP00000362068 |
| ENSP00000247843 | ENSP00000362166 |
| ENSP00000247843 | ENSP00000362578 |
| ENSP00000247843 | ENSP00000363779 |
| ENSP00000247843 | ENSP00000366974 |
| ENSP00000247843 | ENSP00000367406 |
| ENSP00000247843 | ENSP00000368438 |
| ENSP00000247843 | ENSP00000368565 |
| ENSP00000247843 | ENSP00000369162 |
| ENSP00000247843 | ENSP00000374213 |
| ENSP00000247843 | ENSP00000374280 |
| ENSP00000247843 | ENSP00000377265 |
| ENSP00000247843 | ENSP00000377969 |
| ENSP00000247843 | ENSP00000378350 |
| ENSP00000247843 | ENSP00000382562 |
| ENSP00000247843 | ENSP00000382688 |
| ENSP00000247843 | ENSP00000385215 |
| ENSP00000247843 | ENSP00000386759 |
| ENSP00000247843 | ENSP00000391457 |
| ENSP00000247843 | ENSP00000392617 |
| ENSP00000247843 | ENSP00000402338 |
| ENSP00000247843 | ENSP00000403852 |
| ENSP00000247843 | ENSP00000418734 |
| ENSP00000247970 | ENSP00000248673 |
| ENSP00000247970 | ENSP00000251038 |
| ENSP00000247970 | ENSP00000252037 |
| ENSP00000247970 | ENSP00000253108 |
| ENSP00000247970 | ENSP00000253329 |
| ENSP00000247970 | ENSP00000256442 |
| ENSP00000247970 | ENSP00000258062 |
| ENSP00000247970 | ENSP00000260327 |
| ENSP00000247970 | ENSP00000260753 |
| ENSP00000247970 | ENSP00000260970 |
| ENSP00000247970 | ENSP00000261308 |
| ENSP00000247970 | ENSP00000261396 |
| ENSP00000247970 | ENSP00000262043 |
| ENSP00000247970 | ENSP00000262146 |
| ENSP00000247970 | ENSP00000262300 |
| ENSP00000247970 | ENSP00000262320 |
| ENSP00000247970 | ENSP00000262519 |

|                 |                 |
|-----------------|-----------------|
| ENSP00000247970 | ENSP00000262643 |
| ENSP00000247970 | ENSP00000262765 |
| ENSP00000247970 | ENSP00000262803 |
| ENSP00000247970 | ENSP00000262854 |
| ENSP00000247970 | ENSP00000263228 |
| ENSP00000247970 | ENSP00000263390 |
| ENSP00000247970 | ENSP00000264731 |
| ENSP00000247970 | ENSP00000264883 |
| ENSP00000247970 | ENSP00000264951 |
| ENSP00000247970 | ENSP00000265354 |
| ENSP00000247970 | ENSP00000266000 |
| ENSP00000247970 | ENSP00000266070 |
| ENSP00000247970 | ENSP00000267197 |
| ENSP00000247970 | ENSP00000268058 |
| ENSP00000247970 | ENSP00000277541 |
| ENSP00000247970 | ENSP00000281708 |
| ENSP00000247970 | ENSP00000282388 |
| ENSP00000247970 | ENSP00000282441 |
| ENSP00000247970 | ENSP00000283033 |
| ENSP00000247970 | ENSP00000283195 |
| ENSP00000247970 | ENSP00000284981 |
| ENSP00000247970 | ENSP00000285968 |
| ENSP00000247970 | ENSP00000286091 |
| ENSP00000247970 | ENSP00000286835 |
| ENSP00000247970 | ENSP00000288602 |
| ENSP00000247970 | ENSP00000290130 |
| ENSP00000247970 | ENSP00000291386 |
| ENSP00000247970 | ENSP00000293288 |
| ENSP00000247970 | ENSP00000294008 |
| ENSP00000247970 | ENSP00000296666 |
| ENSP00000247970 | ENSP00000297591 |
| ENSP00000247970 | ENSP00000298281 |
| ENSP00000247970 | ENSP00000299543 |
| ENSP00000247970 | ENSP00000300181 |
| ENSP00000247970 | ENSP00000300651 |
| ENSP00000247970 | ENSP00000301740 |
| ENSP00000247970 | ENSP00000301764 |
| ENSP00000247970 | ENSP00000302530 |
| ENSP00000247970 | ENSP00000304350 |
| ENSP00000247970 | ENSP00000304593 |
| ENSP00000247970 | ENSP00000305503 |
| ENSP00000247970 | ENSP00000307863 |
| ENSP00000247970 | ENSP00000310668 |
| ENSP00000247970 | ENSP00000311430 |
| ENSP00000247970 | ENSP00000312735 |
| ENSP00000247970 | ENSP00000313391 |

|                 |                 |
|-----------------|-----------------|
| ENSP00000247970 | ENSP00000314949 |
| ENSP00000247970 | ENSP00000315859 |
| ENSP00000247970 | ENSP00000317232 |
| ENSP00000247970 | ENSP00000317891 |
| ENSP00000247970 | ENSP00000318115 |
| ENSP00000247970 | ENSP00000323050 |
| ENSP00000247970 | ENSP00000323074 |
| ENSP00000247970 | ENSP00000324274 |
| ENSP00000247970 | ENSP00000326261 |
| ENSP00000247970 | ENSP00000329029 |
| ENSP00000247970 | ENSP00000329623 |
| ENSP00000247970 | ENSP00000330343 |
| ENSP00000247970 | ENSP00000334538 |
| ENSP00000247970 | ENSP00000336868 |
| ENSP00000247970 | ENSP00000340820 |
| ENSP00000247970 | ENSP00000344456 |
| ENSP00000247970 | ENSP00000345023 |
| ENSP00000247970 | ENSP00000345530 |
| ENSP00000247970 | ENSP00000346227 |
| ENSP00000247970 | ENSP00000346634 |
| ENSP00000247970 | ENSP00000347206 |
| ENSP00000247970 | ENSP00000348551 |
| ENSP00000247970 | ENSP00000349748 |
| ENSP00000247970 | ENSP00000351926 |
| ENSP00000247970 | ENSP00000352175 |
| ENSP00000247970 | ENSP00000352257 |
| ENSP00000247970 | ENSP00000352400 |
| ENSP00000247970 | ENSP00000352738 |
| ENSP00000247970 | ENSP00000353670 |
| ENSP00000247970 | ENSP00000353920 |
| ENSP00000247970 | ENSP00000354730 |
| ENSP00000247970 | ENSP00000356146 |
| ENSP00000247970 | ENSP00000356405 |
| ENSP00000247970 | ENSP00000356694 |
| ENSP00000247970 | ENSP00000357643 |
| ENSP00000247970 | ENSP00000357907 |
| ENSP00000247970 | ENSP00000358022 |
| ENSP00000247970 | ENSP00000358997 |
| ENSP00000247970 | ENSP00000359531 |
| ENSP00000247970 | ENSP00000359988 |
| ENSP00000247970 | ENSP00000360286 |
| ENSP00000247970 | ENSP00000360944 |
| ENSP00000247970 | ENSP00000362282 |
| ENSP00000247970 | ENSP00000362608 |
| ENSP00000247970 | ENSP00000363694 |
| ENSP00000247970 | ENSP00000365025 |

|                 |                 |
|-----------------|-----------------|
| ENSP00000247970 | ENSP00000365439 |
| ENSP00000247970 | ENSP00000366135 |
| ENSP00000247970 | ENSP00000366607 |
| ENSP00000247970 | ENSP00000366863 |
| ENSP00000247970 | ENSP00000366974 |
| ENSP00000247970 | ENSP00000368927 |
| ENSP00000247970 | ENSP00000370023 |
| ENSP00000247970 | ENSP00000370150 |
| ENSP00000247970 | ENSP00000370460 |
| ENSP00000247970 | ENSP00000374529 |
| ENSP00000247970 | ENSP00000377969 |
| ENSP00000247970 | ENSP00000379228 |
| ENSP00000247970 | ENSP00000382688 |
| ENSP00000247970 | ENSP00000385746 |
| ENSP00000247970 | ENSP00000386759 |
| ENSP00000247970 | ENSP00000391774 |
| ENSP00000247970 | ENSP00000402084 |
| ENSP00000247970 | ENSP00000406293 |
| ENSP00000247970 | ENSP00000412292 |
| ENSP00000247970 | ENSP00000413152 |
| ENSP00000247977 | ENSP00000284811 |
| ENSP00000247977 | ENSP00000285021 |
| ENSP00000247977 | ENSP00000288985 |
| ENSP00000247977 | ENSP00000334675 |
| ENSP00000247977 | ENSP00000348089 |
| ENSP00000247977 | ENSP00000350708 |
| ENSP00000247977 | ENSP00000360621 |
| ENSP00000247977 | ENSP00000364270 |
| ENSP00000247977 | ENSP00000413720 |
| ENSP00000247986 | ENSP00000249373 |
| ENSP00000247986 | ENSP00000265381 |
| ENSP00000247986 | ENSP00000284981 |
| ENSP00000247986 | ENSP00000297338 |
| ENSP00000247986 | ENSP00000367408 |
| ENSP00000247986 | ENSP00000385722 |
| ENSP00000248089 | ENSP00000309555 |
| ENSP00000248098 | ENSP00000332513 |
| ENSP00000248098 | ENSP00000362306 |
| ENSP00000248114 | ENSP00000251038 |
| ENSP00000248114 | ENSP00000254616 |
| ENSP00000248114 | ENSP00000257245 |
| ENSP00000248114 | ENSP00000264515 |
| ENSP00000248114 | ENSP00000295767 |
| ENSP00000248114 | ENSP00000299259 |
| ENSP00000248114 | ENSP00000307786 |
| ENSP00000248114 | ENSP00000321239 |

|                 |                 |
|-----------------|-----------------|
| ENSP00000248114 | ENSP00000326579 |
| ENSP00000248114 | ENSP00000340896 |
| ENSP00000248114 | ENSP00000346340 |
| ENSP00000248114 | ENSP00000350512 |
| ENSP00000248114 | ENSP00000351894 |
| ENSP00000248114 | ENSP00000379042 |
| ENSP00000248139 | ENSP00000253861 |
| ENSP00000248139 | ENSP00000262306 |
| ENSP00000248139 | ENSP00000272427 |
| ENSP00000248139 | ENSP00000273480 |
| ENSP00000248139 | ENSP00000284811 |
| ENSP00000248139 | ENSP00000334100 |
| ENSP00000248139 | ENSP00000336724 |
| ENSP00000248139 | ENSP00000361162 |
| ENSP00000248139 | ENSP00000362399 |
| ENSP00000248139 | ENSP00000389934 |
| ENSP00000248150 | ENSP00000345731 |
| ENSP00000248244 | ENSP00000259075 |
| ENSP00000248244 | ENSP00000259808 |
| ENSP00000248244 | ENSP00000262213 |
| ENSP00000248244 | ENSP00000264122 |
| ENSP00000248244 | ENSP00000329411 |
| ENSP00000248244 | ENSP00000329967 |
| ENSP00000248244 | ENSP00000342755 |
| ENSP00000248244 | ENSP00000362900 |
| ENSP00000248244 | ENSP00000363089 |
| ENSP00000248244 | ENSP00000364898 |
| ENSP00000248244 | ENSP00000374552 |
| ENSP00000248244 | ENSP00000376445 |
| ENSP00000248244 | ENSP00000401980 |
| ENSP00000248244 | ENSP00000419371 |
| ENSP00000248342 | ENSP00000253108 |
| ENSP00000248342 | ENSP00000261868 |
| ENSP00000248342 | ENSP00000310040 |
| ENSP00000248342 | ENSP00000354125 |
| ENSP00000248342 | ENSP00000358140 |
| ENSP00000248342 | ENSP00000416892 |
| ENSP00000248378 | ENSP00000251038 |
| ENSP00000248378 | ENSP00000255389 |
| ENSP00000248378 | ENSP00000327716 |
| ENSP00000248420 | ENSP00000315859 |
| ENSP00000248450 | ENSP00000248566 |
| ENSP00000248450 | ENSP00000262030 |
| ENSP00000248450 | ENSP00000262966 |
| ENSP00000248450 | ENSP00000298283 |
| ENSP00000248450 | ENSP00000339145 |



|                 |                 |
|-----------------|-----------------|
| ENSP00000248450 | ENSP00000348442 |
| ENSP00000248450 | ENSP00000353246 |
| ENSP00000248450 | ENSP00000354040 |
| ENSP00000248450 | ENSP00000363559 |
| ENSP00000248450 | ENSP00000366135 |
| ENSP00000248450 | ENSP00000396937 |
| ENSP00000248450 | ENSP00000418734 |
| ENSP00000248553 | ENSP00000250237 |
| ENSP00000248553 | ENSP00000255465 |
| ENSP00000248553 | ENSP00000257940 |
| ENSP00000248553 | ENSP00000259457 |
| ENSP00000248553 | ENSP00000261531 |
| ENSP00000248553 | ENSP00000263956 |
| ENSP00000248553 | ENSP00000264689 |
| ENSP00000248553 | ENSP00000266000 |
| ENSP00000248553 | ENSP00000267812 |
| ENSP00000248553 | ENSP00000268676 |
| ENSP00000248553 | ENSP00000270223 |
| ENSP00000248553 | ENSP00000281273 |
| ENSP00000248553 | ENSP00000287022 |
| ENSP00000248553 | ENSP00000291900 |
| ENSP00000248553 | ENSP00000294008 |
| ENSP00000248553 | ENSP00000295901 |
| ENSP00000248553 | ENSP00000297185 |
| ENSP00000248553 | ENSP00000299767 |
| ENSP00000248553 | ENSP00000300022 |
| ENSP00000248553 | ENSP00000301740 |
| ENSP00000248553 | ENSP00000303434 |
| ENSP00000248553 | ENSP00000304353 |
| ENSP00000248553 | ENSP00000305790 |
| ENSP00000248553 | ENSP00000307786 |
| ENSP00000248553 | ENSP00000311505 |
| ENSP00000248553 | ENSP00000315768 |
| ENSP00000248553 | ENSP00000316879 |
| ENSP00000248553 | ENSP00000320236 |
| ENSP00000248553 | ENSP00000323635 |
| ENSP00000248553 | ENSP00000331310 |
| ENSP00000248553 | ENSP00000333568 |
| ENSP00000248553 | ENSP00000334061 |
| ENSP00000248553 | ENSP00000337340 |
| ENSP00000248553 | ENSP00000338345 |
| ENSP00000248553 | ENSP00000339479 |
| ENSP00000248553 | ENSP00000340019 |
| ENSP00000248553 | ENSP00000343526 |
| ENSP00000248553 | ENSP00000345892 |
| ENSP00000248553 | ENSP00000350633 |

|                 |                 |
|-----------------|-----------------|
| ENSP00000248553 | ENSP00000351492 |
| ENSP00000248553 | ENSP00000357980 |
| ENSP00000248553 | ENSP00000360532 |
| ENSP00000248553 | ENSP00000362869 |
| ENSP00000248553 | ENSP00000364847 |
| ENSP00000248553 | ENSP00000366800 |
| ENSP00000248553 | ENSP00000367196 |
| ENSP00000248553 | ENSP00000367319 |
| ENSP00000248553 | ENSP00000369456 |
| ENSP00000248553 | ENSP00000374455 |
| ENSP00000248553 | ENSP00000379908 |
| ENSP00000248553 | ENSP00000386165 |
| ENSP00000248553 | ENSP00000396876 |
| ENSP00000248566 | ENSP00000251074 |
| ENSP00000248566 | ENSP00000252115 |
| ENSP00000248566 | ENSP00000252622 |
| ENSP00000248566 | ENSP00000253003 |
| ENSP00000248566 | ENSP00000253861 |
| ENSP00000248566 | ENSP00000261601 |
| ENSP00000248566 | ENSP00000261712 |
| ENSP00000248566 | ENSP00000261868 |
| ENSP00000248566 | ENSP00000262193 |
| ENSP00000248566 | ENSP00000262518 |
| ENSP00000248566 | ENSP00000263576 |
| ENSP00000248566 | ENSP00000264183 |
| ENSP00000248566 | ENSP00000264515 |
| ENSP00000248566 | ENSP00000264639 |
| ENSP00000248566 | ENSP00000267425 |
| ENSP00000248566 | ENSP00000272427 |
| ENSP00000248566 | ENSP00000283351 |
| ENSP00000248566 | ENSP00000290541 |
| ENSP00000248566 | ENSP00000295901 |
| ENSP00000248566 | ENSP00000296786 |
| ENSP00000248566 | ENSP00000298852 |
| ENSP00000248566 | ENSP00000299206 |
| ENSP00000248566 | ENSP00000300291 |
| ENSP00000248566 | ENSP00000300648 |
| ENSP00000248566 | ENSP00000302160 |
| ENSP00000248566 | ENSP00000304593 |
| ENSP00000248566 | ENSP00000309474 |
| ENSP00000248566 | ENSP00000310129 |
| ENSP00000248566 | ENSP00000310260 |
| ENSP00000248566 | ENSP00000310596 |
| ENSP00000248566 | ENSP00000312244 |
| ENSP00000248566 | ENSP00000312735 |
| ENSP00000248566 | ENSP00000318374 |

|                 |                 |
|-----------------|-----------------|
| ENSP00000248566 | ENSP00000318775 |
| ENSP00000248566 | ENSP00000325677 |
| ENSP00000248566 | ENSP00000327889 |
| ENSP00000248566 | ENSP00000331310 |
| ENSP00000248566 | ENSP00000331817 |
| ENSP00000248566 | ENSP00000334188 |
| ENSP00000248566 | ENSP00000337405 |
| ENSP00000248566 | ENSP00000346022 |
| ENSP00000248566 | ENSP00000347602 |
| ENSP00000248566 | ENSP00000347997 |
| ENSP00000248566 | ENSP00000348442 |
| ENSP00000248566 | ENSP00000350283 |
| ENSP00000248566 | ENSP00000352678 |
| ENSP00000248566 | ENSP00000354883 |
| ENSP00000248566 | ENSP00000355961 |
| ENSP00000248566 | ENSP00000356405 |
| ENSP00000248566 | ENSP00000356641 |
| ENSP00000248566 | ENSP00000356989 |
| ENSP00000248566 | ENSP00000357887 |
| ENSP00000248566 | ENSP00000360116 |
| ENSP00000248566 | ENSP00000360286 |
| ENSP00000248566 | ENSP00000360473 |
| ENSP00000248566 | ENSP00000360515 |
| ENSP00000248566 | ENSP00000362110 |
| ENSP00000248566 | ENSP00000362334 |
| ENSP00000248566 | ENSP00000363018 |
| ENSP00000248566 | ENSP00000364709 |
| ENSP00000248566 | ENSP00000365837 |
| ENSP00000248566 | ENSP00000366135 |
| ENSP00000248566 | ENSP00000369497 |
| ENSP00000248566 | ENSP00000369531 |
| ENSP00000248566 | ENSP00000369897 |
| ENSP00000248566 | ENSP00000374213 |
| ENSP00000248566 | ENSP00000374280 |
| ENSP00000248566 | ENSP00000379217 |
| ENSP00000248566 | ENSP00000381064 |
| ENSP00000248566 | ENSP00000381293 |
| ENSP00000248566 | ENSP00000386212 |
| ENSP00000248566 | ENSP00000389934 |
| ENSP00000248566 | ENSP00000391944 |
| ENSP00000248566 | ENSP00000396937 |
| ENSP00000248566 | ENSP00000398208 |
| ENSP00000248566 | ENSP00000401508 |
| ENSP00000248566 | ENSP00000402240 |
| ENSP00000248566 | ENSP00000414237 |
| ENSP00000248566 | ENSP00000417132 |

|                 |                 |
|-----------------|-----------------|
| ENSP00000248572 | ENSP00000259467 |
| ENSP00000248572 | ENSP00000346127 |
| ENSP00000248572 | ENSP00000360141 |
| ENSP00000248600 | ENSP00000252934 |
| ENSP00000248600 | ENSP00000275605 |
| ENSP00000248600 | ENSP00000364188 |
| ENSP00000248600 | ENSP00000364320 |
| ENSP00000248600 | ENSP00000379339 |
| ENSP00000248600 | ENSP00000386259 |
| ENSP00000248633 | ENSP00000251968 |
| ENSP00000248633 | ENSP00000264169 |
| ENSP00000248633 | ENSP00000274140 |
| ENSP00000248633 | ENSP00000288774 |
| ENSP00000248633 | ENSP00000295030 |
| ENSP00000248633 | ENSP00000303511 |
| ENSP00000248633 | ENSP00000309141 |
| ENSP00000248633 | ENSP00000317087 |
| ENSP00000248633 | ENSP00000317468 |
| ENSP00000248633 | ENSP00000329933 |
| ENSP00000248633 | ENSP00000331106 |
| ENSP00000248633 | ENSP00000349016 |
| ENSP00000248633 | ENSP00000360412 |
| ENSP00000248633 | ENSP00000366565 |
| ENSP00000248633 | ENSP00000396704 |
| ENSP00000248633 | ENSP00000407401 |
| ENSP00000248643 | ENSP00000263857 |
| ENSP00000248643 | ENSP00000265732 |
| ENSP00000248643 | ENSP00000292478 |
| ENSP00000248643 | ENSP00000301585 |
| ENSP00000248673 | ENSP00000252108 |
| ENSP00000248673 | ENSP00000252996 |
| ENSP00000248673 | ENSP00000262300 |
| ENSP00000248673 | ENSP00000263056 |
| ENSP00000248673 | ENSP00000263121 |
| ENSP00000248673 | ENSP00000264951 |
| ENSP00000248673 | ENSP00000283882 |
| ENSP00000248673 | ENSP00000318195 |
| ENSP00000248673 | ENSP00000320503 |
| ENSP00000248673 | ENSP00000343001 |
| ENSP00000248673 | ENSP00000348708 |
| ENSP00000248673 | ENSP00000350078 |
| ENSP00000248673 | ENSP00000351596 |
| ENSP00000248673 | ENSP00000351811 |
| ENSP00000248673 | ENSP00000352400 |
| ENSP00000248673 | ENSP00000359345 |
| ENSP00000248673 | ENSP00000365756 |

|                 |                 |
|-----------------|-----------------|
| ENSP00000248673 | ENSP00000373715 |
| ENSP00000248673 | ENSP00000375986 |
| ENSP00000248673 | ENSP00000380921 |
| ENSP00000248673 | ENSP00000398597 |
| ENSP00000248706 | ENSP00000381031 |
| ENSP00000248846 | ENSP00000252936 |
| ENSP00000248846 | ENSP00000252999 |
| ENSP00000248846 | ENSP00000260383 |
| ENSP00000248846 | ENSP00000260731 |
| ENSP00000248846 | ENSP00000261435 |
| ENSP00000248846 | ENSP00000261965 |
| ENSP00000248846 | ENSP00000262300 |
| ENSP00000248846 | ENSP00000267068 |
| ENSP00000248846 | ENSP00000270861 |
| ENSP00000248846 | ENSP00000274289 |
| ENSP00000248846 | ENSP00000288976 |
| ENSP00000248846 | ENSP00000296509 |
| ENSP00000248846 | ENSP00000300584 |
| ENSP00000248846 | ENSP00000305941 |
| ENSP00000248846 | ENSP00000331831 |
| ENSP00000248846 | ENSP00000335357 |
| ENSP00000248846 | ENSP00000346566 |
| ENSP00000248846 | ENSP00000354916 |
| ENSP00000248846 | ENSP00000356405 |
| ENSP00000248846 | ENSP00000356448 |
| ENSP00000248846 | ENSP00000363734 |
| ENSP00000248846 | ENSP00000367049 |
| ENSP00000248846 | ENSP00000370517 |
| ENSP00000248846 | ENSP00000372694 |
| ENSP00000248846 | ENSP00000377470 |
| ENSP00000248846 | ENSP00000382328 |
| ENSP00000248846 | ENSP00000402084 |
| ENSP00000248846 | ENSP00000412319 |
| ENSP00000248846 | ENSP00000415678 |
| ENSP00000248879 | ENSP00000324191 |
| ENSP00000248879 | ENSP00000324444 |
| ENSP00000248879 | ENSP00000341680 |
| ENSP00000248929 | ENSP00000259469 |
| ENSP00000248929 | ENSP00000261308 |
| ENSP00000248929 | ENSP00000307387 |
| ENSP00000248929 | ENSP00000344666 |
| ENSP00000248933 | ENSP00000352516 |
| ENSP00000248958 | ENSP00000254942 |
| ENSP00000248958 | ENSP00000264065 |
| ENSP00000248958 | ENSP00000339145 |
| ENSP00000248958 | ENSP00000379500 |

|                 |                 |
|-----------------|-----------------|
| ENSP00000248958 | ENSP00000379607 |
| ENSP00000249014 | ENSP00000265960 |
| ENSP00000249014 | ENSP00000307272 |
| ENSP00000249014 | ENSP00000348455 |
| ENSP00000249016 | ENSP00000298585 |
| ENSP00000249016 | ENSP00000332225 |
| ENSP00000249044 | ENSP00000300574 |
| ENSP00000249075 | ENSP00000263409 |
| ENSP00000249075 | ENSP00000338799 |
| ENSP00000249289 | ENSP00000253413 |
| ENSP00000249289 | ENSP00000272238 |
| ENSP00000249289 | ENSP00000273398 |
| ENSP00000249289 | ENSP00000290949 |
| ENSP00000249289 | ENSP00000292114 |
| ENSP00000249289 | ENSP00000322180 |
| ENSP00000249289 | ENSP00000332247 |
| ENSP00000249289 | ENSP00000333255 |
| ENSP00000249289 | ENSP00000333873 |
| ENSP00000249289 | ENSP00000352522 |
| ENSP00000249289 | ENSP00000358777 |
| ENSP00000249289 | ENSP00000363162 |
| ENSP00000249289 | ENSP00000367697 |
| ENSP00000249289 | ENSP00000369513 |
| ENSP00000249356 | ENSP00000294053 |
| ENSP00000249356 | ENSP00000296255 |
| ENSP00000249356 | ENSP00000296702 |
| ENSP00000249356 | ENSP00000305958 |
| ENSP00000249356 | ENSP00000329558 |
| ENSP00000249356 | ENSP00000346791 |
| ENSP00000249356 | ENSP00000359305 |
| ENSP00000249356 | ENSP00000360286 |
| ENSP00000249356 | ENSP00000363162 |
| ENSP00000249356 | ENSP00000367208 |
| ENSP00000249356 | ENSP00000381003 |
| ENSP00000249373 | ENSP00000253339 |
| ENSP00000249373 | ENSP00000295709 |
| ENSP00000249373 | ENSP00000297814 |
| ENSP00000249373 | ENSP00000332353 |
| ENSP00000249373 | ENSP00000342381 |
| ENSP00000249373 | ENSP00000347294 |
| ENSP00000249373 | ENSP00000354851 |
| ENSP00000249373 | ENSP00000359206 |
| ENSP00000249442 | ENSP00000252487 |
| ENSP00000249442 | ENSP00000290913 |
| ENSP00000249442 | ENSP00000295989 |
| ENSP00000249442 | ENSP00000325562 |

|                 |                 |
|-----------------|-----------------|
| ENSP00000249442 | ENSP00000326296 |
| ENSP00000249442 | ENSP00000327959 |
| ENSP00000249442 | ENSP00000331608 |
| ENSP00000249442 | ENSP00000334538 |
| ENSP00000249442 | ENSP00000345445 |
| ENSP00000249442 | ENSP00000357360 |
| ENSP00000249442 | ENSP00000359988 |
| ENSP00000249442 | ENSP00000364946 |
| ENSP00000249442 | ENSP00000378132 |
| ENSP00000249442 | ENSP00000387262 |
| ENSP00000249499 | ENSP00000251900 |
| ENSP00000249499 | ENSP00000269385 |
| ENSP00000249499 | ENSP00000287239 |
| ENSP00000249499 | ENSP00000306894 |
| ENSP00000249499 | ENSP00000318423 |
| ENSP00000249499 | ENSP00000326296 |
| ENSP00000249499 | ENSP00000343246 |
| ENSP00000249499 | ENSP00000355013 |
| ENSP00000249499 | ENSP00000356058 |
| ENSP00000249499 | ENSP00000356737 |
| ENSP00000249499 | ENSP00000359321 |
| ENSP00000249499 | ENSP00000362588 |
| ENSP00000249499 | ENSP00000394085 |
| ENSP00000249504 | ENSP00000318423 |
| ENSP00000249504 | ENSP00000326296 |
| ENSP00000249636 | ENSP00000252137 |
| ENSP00000249636 | ENSP00000254719 |
| ENSP00000249636 | ENSP00000258428 |
| ENSP00000249636 | ENSP00000262320 |
| ENSP00000249636 | ENSP00000262367 |
| ENSP00000249636 | ENSP00000263620 |
| ENSP00000249636 | ENSP00000264709 |
| ENSP00000249636 | ENSP00000264818 |
| ENSP00000249636 | ENSP00000264926 |
| ENSP00000249636 | ENSP00000265990 |
| ENSP00000249636 | ENSP00000266971 |
| ENSP00000249636 | ENSP00000267430 |
| ENSP00000249636 | ENSP00000268058 |
| ENSP00000249636 | ENSP00000268489 |
| ENSP00000249636 | ENSP00000269468 |
| ENSP00000249636 | ENSP00000270225 |
| ENSP00000249636 | ENSP00000278616 |
| ENSP00000249636 | ENSP00000281928 |
| ENSP00000249636 | ENSP00000285021 |
| ENSP00000249636 | ENSP00000287437 |
| ENSP00000249636 | ENSP00000287820 |

|                 |                 |
|-----------------|-----------------|
| ENSP00000249636 | ENSP00000288774 |
| ENSP00000249636 | ENSP00000296273 |
| ENSP00000249636 | ENSP00000298139 |
| ENSP00000249636 | ENSP00000307900 |
| ENSP00000249636 | ENSP00000308944 |
| ENSP00000249636 | ENSP00000313420 |
| ENSP00000249636 | ENSP00000314080 |
| ENSP00000249636 | ENSP00000317636 |
| ENSP00000249636 | ENSP00000317872 |
| ENSP00000249636 | ENSP00000321636 |
| ENSP00000249636 | ENSP00000321706 |
| ENSP00000249636 | ENSP00000322242 |
| ENSP00000249636 | ENSP00000322457 |
| ENSP00000249636 | ENSP00000322570 |
| ENSP00000249636 | ENSP00000323439 |
| ENSP00000249636 | ENSP00000325120 |
| ENSP00000249636 | ENSP00000327077 |
| ENSP00000249636 | ENSP00000327197 |
| ENSP00000249636 | ENSP00000330343 |
| ENSP00000249636 | ENSP00000333275 |
| ENSP00000249636 | ENSP00000339826 |
| ENSP00000249636 | ENSP00000340305 |
| ENSP00000249636 | ENSP00000341024 |
| ENSP00000249636 | ENSP00000341189 |
| ENSP00000249636 | ENSP00000341208 |
| ENSP00000249636 | ENSP00000341382 |
| ENSP00000249636 | ENSP00000341551 |
| ENSP00000249636 | ENSP00000343392 |
| ENSP00000249636 | ENSP00000343435 |
| ENSP00000249636 | ENSP00000343741 |
| ENSP00000249636 | ENSP00000346120 |
| ENSP00000249636 | ENSP00000347232 |
| ENSP00000249636 | ENSP00000350249 |
| ENSP00000249636 | ENSP00000350283 |
| ENSP00000249636 | ENSP00000351284 |
| ENSP00000249636 | ENSP00000351697 |
| ENSP00000249636 | ENSP00000352257 |
| ENSP00000249636 | ENSP00000354340 |
| ENSP00000249636 | ENSP00000354522 |
| ENSP00000249636 | ENSP00000354558 |
| ENSP00000249636 | ENSP00000354586 |
| ENSP00000249636 | ENSP00000354742 |
| ENSP00000249636 | ENSP00000354957 |
| ENSP00000249636 | ENSP00000355185 |
| ENSP00000249636 | ENSP00000356579 |
| ENSP00000249636 | ENSP00000357965 |



|                 |                 |
|-----------------|-----------------|
| ENSP00000249636 | ENSP00000358092 |
| ENSP00000249636 | ENSP00000358478 |
| ENSP00000249636 | ENSP00000358918 |
| ENSP00000249636 | ENSP00000360147 |
| ENSP00000249636 | ENSP00000361310 |
| ENSP00000249636 | ENSP00000363095 |
| ENSP00000249636 | ENSP00000368349 |
| ENSP00000249636 | ENSP00000368438 |
| ENSP00000249636 | ENSP00000369335 |
| ENSP00000249636 | ENSP00000370150 |
| ENSP00000249636 | ENSP00000372170 |
| ENSP00000249636 | ENSP00000373060 |
| ENSP00000249636 | ENSP00000377218 |
| ENSP00000249636 | ENSP00000377655 |
| ENSP00000249636 | ENSP00000394791 |
| ENSP00000249636 | ENSP00000402515 |
| ENSP00000249636 | ENSP00000402527 |
| ENSP00000249636 | ENSP00000417281 |
| ENSP00000249647 | ENSP00000250113 |
| ENSP00000249647 | ENSP00000253861 |
| ENSP00000249647 | ENSP00000258301 |
| ENSP00000249647 | ENSP00000260818 |
| ENSP00000249647 | ENSP00000261017 |
| ENSP00000249647 | ENSP00000263233 |
| ENSP00000249647 | ENSP00000263897 |
| ENSP00000249647 | ENSP00000264157 |
| ENSP00000249647 | ENSP00000272427 |
| ENSP00000249647 | ENSP00000273398 |
| ENSP00000249647 | ENSP00000286448 |
| ENSP00000249647 | ENSP00000294179 |
| ENSP00000249647 | ENSP00000305810 |
| ENSP00000249647 | ENSP00000310521 |
| ENSP00000249647 | ENSP00000317714 |
| ENSP00000249647 | ENSP00000323377 |
| ENSP00000249647 | ENSP00000324628 |
| ENSP00000249647 | ENSP00000332326 |
| ENSP00000249647 | ENSP00000334100 |
| ENSP00000249647 | ENSP00000337501 |
| ENSP00000249647 | ENSP00000339191 |
| ENSP00000249647 | ENSP00000341681 |
| ENSP00000249647 | ENSP00000342793 |
| ENSP00000249647 | ENSP00000353564 |
| ENSP00000249647 | ENSP00000354346 |
| ENSP00000249647 | ENSP00000357674 |
| ENSP00000249647 | ENSP00000360183 |
| ENSP00000249647 | ENSP00000367197 |

|                 |                 |
|-----------------|-----------------|
| ENSP00000249647 | ENSP00000369409 |
| ENSP00000249647 | ENSP00000370719 |
| ENSP00000249647 | ENSP00000381293 |
| ENSP00000249647 | ENSP00000382177 |
| ENSP00000249647 | ENSP00000389934 |
| ENSP00000249647 | ENSP00000390783 |
| ENSP00000249647 | ENSP00000403397 |
| ENSP00000249647 | ENSP00000417748 |
| ENSP00000249776 | ENSP00000258169 |
| ENSP00000249806 | ENSP00000259512 |
| ENSP00000249910 | ENSP00000301838 |
| ENSP00000249910 | ENSP00000307684 |
| ENSP00000249910 | ENSP00000328228 |
| ENSP00000249910 | ENSP00000347979 |
| ENSP00000249910 | ENSP00000353622 |
| ENSP00000249910 | ENSP00000362441 |
| ENSP00000249910 | ENSP00000365025 |
| ENSP00000249923 | ENSP00000251038 |
| ENSP00000249923 | ENSP00000257527 |
| ENSP00000249923 | ENSP00000258062 |
| ENSP00000249923 | ENSP00000259075 |
| ENSP00000249923 | ENSP00000260102 |
| ENSP00000249923 | ENSP00000261531 |
| ENSP00000249923 | ENSP00000262215 |
| ENSP00000249923 | ENSP00000262294 |
| ENSP00000249923 | ENSP00000262812 |
| ENSP00000249923 | ENSP00000264028 |
| ENSP00000249923 | ENSP00000264705 |
| ENSP00000249923 | ENSP00000265070 |
| ENSP00000249923 | ENSP00000265849 |
| ENSP00000249923 | ENSP00000269122 |
| ENSP00000249923 | ENSP00000283195 |
| ENSP00000249923 | ENSP00000294543 |
| ENSP00000249923 | ENSP00000296255 |
| ENSP00000249923 | ENSP00000299601 |
| ENSP00000249923 | ENSP00000303279 |
| ENSP00000249923 | ENSP00000303507 |
| ENSP00000249923 | ENSP00000304592 |
| ENSP00000249923 | ENSP00000306124 |
| ENSP00000249923 | ENSP00000306275 |
| ENSP00000249923 | ENSP00000310129 |
| ENSP00000249923 | ENSP00000310521 |
| ENSP00000249923 | ENSP00000311344 |
| ENSP00000249923 | ENSP00000312735 |
| ENSP00000249923 | ENSP00000325002 |
| ENSP00000249923 | ENSP00000326699 |

|                 |                 |
|-----------------|-----------------|
| ENSP0000024923  | ENSP00000327309 |
| ENSP0000024923  | ENSP00000329419 |
| ENSP0000024923  | ENSP00000329466 |
| ENSP0000024923  | ENSP00000330945 |
| ENSP0000024923  | ENSP00000337688 |
| ENSP0000024923  | ENSP00000341243 |
| ENSP0000024923  | ENSP00000345530 |
| ENSP0000024923  | ENSP00000346206 |
| ENSP0000024923  | ENSP00000348986 |
| ENSP0000024923  | ENSP00000349970 |
| ENSP0000024923  | ENSP00000350633 |
| ENSP0000024923  | ENSP00000352257 |
| ENSP0000024923  | ENSP00000352738 |
| ENSP0000024923  | ENSP00000354347 |
| ENSP0000024923  | ENSP00000354742 |
| ENSP0000024923  | ENSP00000355890 |
| ENSP0000024923  | ENSP00000357048 |
| ENSP0000024923  | ENSP00000359000 |
| ENSP0000024923  | ENSP00000359127 |
| ENSP0000024923  | ENSP00000359380 |
| ENSP0000024923  | ENSP00000360532 |
| ENSP0000024923  | ENSP00000360798 |
| ENSP0000024923  | ENSP00000363205 |
| ENSP0000024923  | ENSP00000364794 |
| ENSP0000024923  | ENSP00000367923 |
| ENSP0000024923  | ENSP00000370607 |
| ENSP0000024923  | ENSP00000377527 |
| ENSP0000024923  | ENSP00000378529 |
| ENSP0000024923  | ENSP00000378546 |
| ENSP0000024923  | ENSP00000379228 |
| ENSP0000024923  | ENSP00000383402 |
| ENSP0000024923  | ENSP00000395701 |
| ENSP0000024923  | ENSP00000411409 |
| ENSP00000250003 | ENSP00000254035 |
| ENSP00000250003 | ENSP00000261523 |
| ENSP00000250003 | ENSP00000261531 |
| ENSP00000250003 | ENSP00000262133 |
| ENSP00000250003 | ENSP00000262367 |
| ENSP00000250003 | ENSP00000263620 |
| ENSP00000250003 | ENSP00000265354 |
| ENSP00000250003 | ENSP00000267163 |
| ENSP00000250003 | ENSP00000271555 |
| ENSP00000250003 | ENSP00000274031 |
| ENSP00000250003 | ENSP00000276326 |
| ENSP00000250003 | ENSP00000295989 |
| ENSP00000250003 | ENSP00000301788 |

|                 |                 |
|-----------------|-----------------|
| ENSP00000250003 | ENSP00000302640 |
| ENSP00000250003 | ENSP00000319169 |
| ENSP00000250003 | ENSP00000325690 |
| ENSP00000250003 | ENSP00000326391 |
| ENSP00000250003 | ENSP00000327436 |
| ENSP00000250003 | ENSP00000329357 |
| ENSP00000250003 | ENSP00000331057 |
| ENSP00000250003 | ENSP00000338983 |
| ENSP00000250003 | ENSP00000340271 |
| ENSP00000250003 | ENSP00000341551 |
| ENSP00000250003 | ENSP00000345107 |
| ENSP00000250003 | ENSP00000348551 |
| ENSP00000250003 | ENSP00000349049 |
| ENSP00000250003 | ENSP00000365877 |
| ENSP00000250003 | ENSP00000367972 |
| ENSP00000250003 | ENSP00000370968 |
| ENSP00000250003 | ENSP00000379003 |
| ENSP00000250003 | ENSP00000399968 |
| ENSP00000250003 | ENSP00000413720 |
| ENSP00000250003 | ENSP00000415151 |
| ENSP00000250092 | ENSP00000261601 |
| ENSP00000250092 | ENSP00000309474 |
| ENSP00000250092 | ENSP00000310129 |
| ENSP00000250092 | ENSP00000348163 |
| ENSP00000250092 | ENSP00000361120 |
| ENSP00000250101 | ENSP00000267415 |
| ENSP00000250101 | ENSP00000309629 |
| ENSP00000250101 | ENSP00000348986 |
| ENSP00000250101 | ENSP00000369647 |
| ENSP00000250113 | ENSP00000254250 |
| ENSP00000250113 | ENSP00000254942 |
| ENSP00000250113 | ENSP00000258947 |
| ENSP00000250113 | ENSP00000262294 |
| ENSP00000250113 | ENSP00000267484 |
| ENSP00000250113 | ENSP00000280362 |
| ENSP00000250113 | ENSP00000282326 |
| ENSP00000250113 | ENSP00000283646 |
| ENSP00000250113 | ENSP00000286317 |
| ENSP00000250113 | ENSP00000293362 |
| ENSP00000250113 | ENSP00000295685 |
| ENSP00000250113 | ENSP00000296755 |
| ENSP00000250113 | ENSP00000300181 |
| ENSP00000250113 | ENSP00000300231 |
| ENSP00000250113 | ENSP00000305785 |
| ENSP00000250113 | ENSP00000306788 |
| ENSP00000250113 | ENSP00000312318 |

|                 |                 |
|-----------------|-----------------|
| ENSP00000250113 | ENSP00000319918 |
| ENSP00000250113 | ENSP00000323050 |
| ENSP00000250113 | ENSP00000324191 |
| ENSP00000250113 | ENSP00000324444 |
| ENSP00000250113 | ENSP00000326767 |
| ENSP00000250113 | ENSP00000329466 |
| ENSP00000250113 | ENSP00000329967 |
| ENSP00000250113 | ENSP00000337838 |
| ENSP00000250113 | ENSP00000339479 |
| ENSP00000250113 | ENSP00000339845 |
| ENSP00000250113 | ENSP00000343129 |
| ENSP00000250113 | ENSP00000343745 |
| ENSP00000250113 | ENSP00000344106 |
| ENSP00000250113 | ENSP00000344460 |
| ENSP00000250113 | ENSP00000346120 |
| ENSP00000250113 | ENSP00000349640 |
| ENSP00000250113 | ENSP00000354777 |
| ENSP00000250113 | ENSP00000359345 |
| ENSP00000250113 | ENSP00000359674 |
| ENSP00000250113 | ENSP00000359740 |
| ENSP00000250113 | ENSP00000359988 |
| ENSP00000250113 | ENSP00000362166 |
| ENSP00000250113 | ENSP00000363676 |
| ENSP00000250113 | ENSP00000365550 |
| ENSP00000250113 | ENSP00000365637 |
| ENSP00000250113 | ENSP00000368402 |
| ENSP00000250113 | ENSP00000374390 |
| ENSP00000250113 | ENSP00000381031 |
| ENSP00000250113 | ENSP00000381795 |
| ENSP00000250113 | ENSP00000382595 |
| ENSP00000250113 | ENSP00000390948 |
| ENSP00000250113 | ENSP00000409279 |
| ENSP00000250124 | ENSP00000261609 |
| ENSP00000250124 | ENSP00000262765 |
| ENSP00000250124 | ENSP00000346050 |
| ENSP00000250124 | ENSP00000357452 |
| ENSP00000250124 | ENSP00000369816 |
| ENSP00000250237 | ENSP00000281273 |
| ENSP00000250263 | ENSP00000267430 |
| ENSP00000250263 | ENSP00000339845 |
| ENSP00000250263 | ENSP00000343745 |
| ENSP00000250263 | ENSP00000417686 |
| ENSP00000250377 | ENSP00000301585 |
| ENSP00000250377 | ENSP00000312356 |
| ENSP00000250448 | ENSP00000263734 |
| ENSP00000250448 | ENSP00000267101 |

|                 |                 |
|-----------------|-----------------|
| ENSP00000250448 | ENSP00000272937 |
| ENSP00000250448 | ENSP00000297689 |
| ENSP00000250448 | ENSP00000305422 |
| ENSP00000250448 | ENSP00000354478 |
| ENSP00000250448 | ENSP00000356795 |
| ENSP00000250448 | ENSP00000386165 |
| ENSP00000250454 | ENSP00000262904 |
| ENSP00000250454 | ENSP00000313674 |
| ENSP00000250454 | ENSP00000381045 |
| ENSP00000250498 | ENSP00000261845 |
| ENSP00000250498 | ENSP00000295770 |
| ENSP00000250498 | ENSP00000296255 |
| ENSP00000250498 | ENSP00000311005 |
| ENSP00000250498 | ENSP00000319979 |
| ENSP00000250498 | ENSP00000358022 |
| ENSP00000250498 | ENSP00000360149 |
| ENSP00000250498 | ENSP00000360644 |
| ENSP00000250498 | ENSP00000364188 |
| ENSP00000250498 | ENSP00000380793 |
| ENSP00000250535 | ENSP00000256474 |
| ENSP00000250615 | ENSP00000251038 |
| ENSP00000250615 | ENSP00000254654 |
| ENSP00000250615 | ENSP00000254900 |
| ENSP00000250615 | ENSP00000262608 |
| ENSP00000250615 | ENSP00000282412 |
| ENSP00000250615 | ENSP00000287936 |
| ENSP00000250615 | ENSP00000293230 |
| ENSP00000250615 | ENSP00000306682 |
| ENSP00000250615 | ENSP00000312411 |
| ENSP00000250615 | ENSP00000372023 |
| ENSP00000250615 | ENSP00000373702 |
| ENSP00000250894 | ENSP00000273130 |
| ENSP00000250894 | ENSP00000314837 |
| ENSP00000250894 | ENSP00000341189 |
| ENSP00000250894 | ENSP00000351908 |
| ENSP00000250894 | ENSP00000363089 |
| ENSP00000250894 | ENSP00000373700 |
| ENSP00000250894 | ENSP00000382423 |
| ENSP00000250937 | ENSP00000262607 |
| ENSP00000250937 | ENSP00000335675 |
| ENSP00000250937 | ENSP00000336702 |
| ENSP00000250937 | ENSP00000361965 |
| ENSP00000250937 | ENSP00000376946 |
| ENSP00000250937 | ENSP00000379678 |
| ENSP00000250937 | ENSP00000384302 |
| ENSP00000251020 | ENSP00000256362 |

|                 |                 |
|-----------------|-----------------|
| ENSP00000251020 | ENSP00000256429 |
| ENSP00000251020 | ENSP00000269385 |
| ENSP00000251020 | ENSP00000276603 |
| ENSP00000251020 | ENSP00000333537 |
| ENSP00000251020 | ENSP00000344456 |
| ENSP00000251020 | ENSP00000351552 |
| ENSP00000251020 | ENSP00000362592 |
| ENSP00000251020 | ENSP00000368253 |
| ENSP00000251020 | ENSP00000379847 |
| ENSP00000251038 | ENSP00000251089 |
| ENSP00000251038 | ENSP00000252115 |
| ENSP00000251038 | ENSP00000252445 |
| ENSP00000251038 | ENSP00000252602 |
| ENSP00000251038 | ENSP00000252622 |
| ENSP00000251038 | ENSP00000252934 |
| ENSP00000251038 | ENSP00000252996 |
| ENSP00000251038 | ENSP00000253003 |
| ENSP00000251038 | ENSP00000253099 |
| ENSP00000251038 | ENSP00000253107 |
| ENSP00000251038 | ENSP00000253108 |
| ENSP00000251038 | ENSP00000253413 |
| ENSP00000251038 | ENSP00000253462 |
| ENSP00000251038 | ENSP00000253693 |
| ENSP00000251038 | ENSP00000253699 |
| ENSP00000251038 | ENSP00000253792 |
| ENSP00000251038 | ENSP00000253794 |
| ENSP00000251038 | ENSP00000254037 |
| ENSP00000251038 | ENSP00000254193 |
| ENSP00000251038 | ENSP00000254719 |
| ENSP00000251038 | ENSP00000254940 |
| ENSP00000251038 | ENSP00000256216 |
| ENSP00000251038 | ENSP00000256319 |
| ENSP00000251038 | ENSP00000256383 |
| ENSP00000251038 | ENSP00000256433 |
| ENSP00000251038 | ENSP00000256897 |
| ENSP00000251038 | ENSP00000257177 |
| ENSP00000251038 | ENSP00000257245 |
| ENSP00000251038 | ENSP00000257548 |
| ENSP00000251038 | ENSP00000257934 |
| ENSP00000251038 | ENSP00000258383 |
| ENSP00000251038 | ENSP00000258424 |
| ENSP00000251038 | ENSP00000258428 |
| ENSP00000251038 | ENSP00000258455 |
| ENSP00000251038 | ENSP00000258874 |
| ENSP00000251038 | ENSP00000258975 |
| ENSP00000251038 | ENSP00000259477 |

|                 |                 |
|-----------------|-----------------|
| ENSP00000251038 | ENSP00000260102 |
| ENSP00000251038 | ENSP00000260443 |
| ENSP00000251038 | ENSP00000260952 |
| ENSP00000251038 | ENSP00000260956 |
| ENSP00000251038 | ENSP00000261070 |
| ENSP00000251038 | ENSP00000261396 |
| ENSP00000251038 | ENSP00000261424 |
| ENSP00000251038 | ENSP00000261434 |
| ENSP00000251038 | ENSP00000261507 |
| ENSP00000251038 | ENSP00000261558 |
| ENSP00000251038 | ENSP00000261601 |
| ENSP00000251038 | ENSP00000261637 |
| ENSP00000251038 | ENSP00000261712 |
| ENSP00000251038 | ENSP00000261778 |
| ENSP00000251038 | ENSP00000261819 |
| ENSP00000251038 | ENSP00000261868 |
| ENSP00000251038 | ENSP00000261942 |
| ENSP00000251038 | ENSP00000261951 |
| ENSP00000251038 | ENSP00000262030 |
| ENSP00000251038 | ENSP00000262077 |
| ENSP00000251038 | ENSP00000262144 |
| ENSP00000251038 | ENSP00000262173 |
| ENSP00000251038 | ENSP00000262193 |
| ENSP00000251038 | ENSP00000262319 |
| ENSP00000251038 | ENSP00000262765 |
| ENSP00000251038 | ENSP00000262812 |
| ENSP00000251038 | ENSP00000262854 |
| ENSP00000251038 | ENSP00000262982 |
| ENSP00000251038 | ENSP00000263187 |
| ENSP00000251038 | ENSP00000263346 |
| ENSP00000251038 | ENSP00000263576 |
| ENSP00000251038 | ENSP00000263629 |
| ENSP00000251038 | ENSP00000263688 |
| ENSP00000251038 | ENSP00000263857 |
| ENSP00000251038 | ENSP00000263897 |
| ENSP00000251038 | ENSP00000263974 |
| ENSP00000251038 | ENSP00000263997 |
| ENSP00000251038 | ENSP00000264005 |
| ENSP00000251038 | ENSP00000264028 |
| ENSP00000251038 | ENSP00000264151 |
| ENSP00000251038 | ENSP00000264169 |
| ENSP00000251038 | ENSP00000264170 |
| ENSP00000251038 | ENSP00000264220 |
| ENSP00000251038 | ENSP00000264255 |
| ENSP00000251038 | ENSP00000264501 |
| ENSP00000251038 | ENSP00000264639 |



|                 |                 |
|-----------------|-----------------|
| ENSP00000251038 | ENSP00000264718 |
| ENSP00000251038 | ENSP00000264926 |
| ENSP00000251038 | ENSP00000264951 |
| ENSP00000251038 | ENSP00000264995 |
| ENSP00000251038 | ENSP00000265038 |
| ENSP00000251038 | ENSP00000265056 |
| ENSP00000251038 | ENSP00000265073 |
| ENSP00000251038 | ENSP00000265175 |
| ENSP00000251038 | ENSP00000265195 |
| ENSP00000251038 | ENSP00000265304 |
| ENSP00000251038 | ENSP00000265351 |
| ENSP00000251038 | ENSP00000265462 |
| ENSP00000251038 | ENSP00000265465 |
| ENSP00000251038 | ENSP00000265960 |
| ENSP00000251038 | ENSP00000266069 |
| ENSP00000251038 | ENSP00000266735 |
| ENSP00000251038 | ENSP00000267425 |
| ENSP00000251038 | ENSP00000267522 |
| ENSP00000251038 | ENSP00000267750 |
| ENSP00000251038 | ENSP00000268206 |
| ENSP00000251038 | ENSP00000268251 |
| ENSP00000251038 | ENSP00000268379 |
| ENSP00000251038 | ENSP00000268533 |
| ENSP00000251038 | ENSP00000268616 |
| ENSP00000251038 | ENSP00000269216 |
| ENSP00000251038 | ENSP00000269499 |
| ENSP00000251038 | ENSP00000270225 |
| ENSP00000251038 | ENSP00000270583 |
| ENSP00000251038 | ENSP00000271628 |
| ENSP00000251038 | ENSP00000272065 |
| ENSP00000251038 | ENSP00000272645 |
| ENSP00000251038 | ENSP00000272748 |
| ENSP00000251038 | ENSP00000273064 |
| ENSP00000251038 | ENSP00000273398 |
| ENSP00000251038 | ENSP00000273783 |
| ENSP00000251038 | ENSP00000273920 |
| ENSP00000251038 | ENSP00000273962 |
| ENSP00000251038 | ENSP00000274606 |
| ENSP00000251038 | ENSP00000274680 |
| ENSP00000251038 | ENSP00000276201 |
| ENSP00000251038 | ENSP00000276416 |
| ENSP00000251038 | ENSP00000278243 |
| ENSP00000251038 | ENSP00000278412 |
| ENSP00000251038 | ENSP00000278483 |
| ENSP00000251038 | ENSP00000278572 |
| ENSP00000251038 | ENSP00000278618 |

|                 |                 |
|-----------------|-----------------|
| ENSP00000251038 | ENSP00000278715 |
| ENSP00000251038 | ENSP00000279147 |
| ENSP00000251038 | ENSP00000280557 |
| ENSP00000251038 | ENSP00000280614 |
| ENSP00000251038 | ENSP00000280700 |
| ENSP00000251038 | ENSP00000282007 |
| ENSP00000251038 | ENSP00000282276 |
| ENSP00000251038 | ENSP00000282412 |
| ENSP00000251038 | ENSP00000282516 |
| ENSP00000251038 | ENSP00000282841 |
| ENSP00000251038 | ENSP00000282892 |
| ENSP00000251038 | ENSP00000282999 |
| ENSP00000251038 | ENSP00000283195 |
| ENSP00000251038 | ENSP00000283290 |
| ENSP00000251038 | ENSP00000283875 |
| ENSP00000251038 | ENSP00000283943 |
| ENSP00000251038 | ENSP00000284957 |
| ENSP00000251038 | ENSP00000285021 |
| ENSP00000251038 | ENSP00000285071 |
| ENSP00000251038 | ENSP00000285398 |
| ENSP00000251038 | ENSP00000285896 |
| ENSP00000251038 | ENSP00000285968 |
| ENSP00000251038 | ENSP00000286448 |
| ENSP00000251038 | ENSP00000286835 |
| ENSP00000251038 | ENSP00000287022 |
| ENSP00000251038 | ENSP00000287038 |
| ENSP00000251038 | ENSP00000288266 |
| ENSP00000251038 | ENSP00000288532 |
| ENSP00000251038 | ENSP00000288976 |
| ENSP00000251038 | ENSP00000289371 |
| ENSP00000251038 | ENSP00000290158 |
| ENSP00000251038 | ENSP00000290231 |
| ENSP00000251038 | ENSP00000290299 |
| ENSP00000251038 | ENSP00000290429 |
| ENSP00000251038 | ENSP00000290597 |
| ENSP00000251038 | ENSP00000290810 |
| ENSP00000251038 | ENSP00000291576 |
| ENSP00000251038 | ENSP00000291688 |
| ENSP00000251038 | ENSP00000292180 |
| ENSP00000251038 | ENSP00000292476 |
| ENSP00000251038 | ENSP00000293195 |
| ENSP00000251038 | ENSP00000293350 |
| ENSP00000251038 | ENSP00000293404 |
| ENSP00000251038 | ENSP00000293406 |
| ENSP00000251038 | ENSP00000293860 |
| ENSP00000251038 | ENSP00000293883 |

|                 |                 |
|-----------------|-----------------|
| ENSP00000251038 | ENSP00000294179 |
| ENSP00000251038 | ENSP00000294189 |
| ENSP00000251038 | ENSP00000294360 |
| ENSP00000251038 | ENSP00000294724 |
| ENSP00000251038 | ENSP00000294973 |
| ENSP00000251038 | ENSP00000295065 |
| ENSP00000251038 | ENSP00000295321 |
| ENSP00000251038 | ENSP00000295685 |
| ENSP00000251038 | ENSP00000295767 |
| ENSP00000251038 | ENSP00000295890 |
| ENSP00000251038 | ENSP00000295951 |
| ENSP00000251038 | ENSP00000296102 |
| ENSP00000251038 | ENSP00000296215 |
| ENSP00000251038 | ENSP00000296273 |
| ENSP00000251038 | ENSP00000296328 |
| ENSP00000251038 | ENSP00000296411 |
| ENSP00000251038 | ENSP00000296490 |
| ENSP00000251038 | ENSP00000296509 |
| ENSP00000251038 | ENSP00000296543 |
| ENSP00000251038 | ENSP00000296702 |
| ENSP00000251038 | ENSP00000296783 |
| ENSP00000251038 | ENSP00000298281 |
| ENSP00000251038 | ENSP00000298292 |
| ENSP00000251038 | ENSP00000298310 |
| ENSP00000251038 | ENSP00000298585 |
| ENSP00000251038 | ENSP00000298746 |
| ENSP00000251038 | ENSP00000298937 |
| ENSP00000251038 | ENSP00000299138 |
| ENSP00000251038 | ENSP00000299259 |
| ENSP00000251038 | ENSP00000299424 |
| ENSP00000251038 | ENSP00000299543 |
| ENSP00000251038 | ENSP00000299601 |
| ENSP00000251038 | ENSP00000300107 |
| ENSP00000251038 | ENSP00000300151 |
| ENSP00000251038 | ENSP00000300452 |
| ENSP00000251038 | ENSP00000300648 |
| ENSP00000251038 | ENSP00000300688 |
| ENSP00000251038 | ENSP00000301587 |
| ENSP00000251038 | ENSP00000301761 |
| ENSP00000251038 | ENSP00000301788 |
| ENSP00000251038 | ENSP00000302111 |
| ENSP00000251038 | ENSP00000302114 |
| ENSP00000251038 | ENSP00000302160 |
| ENSP00000251038 | ENSP00000302478 |
| ENSP00000251038 | ENSP00000302620 |
| ENSP00000251038 | ENSP00000302768 |

|                 |                 |
|-----------------|-----------------|
| ENSP00000251038 | ENSP00000302783 |
| ENSP00000251038 | ENSP00000302790 |
| ENSP00000251038 | ENSP00000302886 |
| ENSP00000251038 | ENSP00000303279 |
| ENSP00000251038 | ENSP00000303552 |
| ENSP00000251038 | ENSP00000303584 |
| ENSP00000251038 | ENSP00000304903 |
| ENSP00000251038 | ENSP00000305503 |
| ENSP00000251038 | ENSP00000305790 |
| ENSP00000251038 | ENSP00000305958 |
| ENSP00000251038 | ENSP00000306425 |
| ENSP00000251038 | ENSP00000306548 |
| ENSP00000251038 | ENSP00000306817 |
| ENSP00000251038 | ENSP00000307208 |
| ENSP00000251038 | ENSP00000307491 |
| ENSP00000251038 | ENSP00000307850 |
| ENSP00000251038 | ENSP00000307900 |
| ENSP00000251038 | ENSP00000307939 |
| ENSP00000251038 | ENSP00000308179 |
| ENSP00000251038 | ENSP00000308332 |
| ENSP00000251038 | ENSP00000308622 |
| ENSP00000251038 | ENSP00000308897 |
| ENSP00000251038 | ENSP00000308944 |
| ENSP00000251038 | ENSP00000309142 |
| ENSP00000251038 | ENSP00000309198 |
| ENSP00000251038 | ENSP00000309463 |
| ENSP00000251038 | ENSP00000309565 |
| ENSP00000251038 | ENSP00000309830 |
| ENSP00000251038 | ENSP00000310129 |
| ENSP00000251038 | ENSP00000310440 |
| ENSP00000251038 | ENSP00000310596 |
| ENSP00000251038 | ENSP00000310668 |
| ENSP00000251038 | ENSP00000310723 |
| ENSP00000251038 | ENSP00000311200 |
| ENSP00000251038 | ENSP00000311984 |
| ENSP00000251038 | ENSP00000312066 |
| ENSP00000251038 | ENSP00000312224 |
| ENSP00000251038 | ENSP00000312311 |
| ENSP00000251038 | ENSP00000312697 |
| ENSP00000251038 | ENSP00000312735 |
| ENSP00000251038 | ENSP00000312981 |
| ENSP00000251038 | ENSP00000313432 |
| ENSP00000251038 | ENSP00000313490 |
| ENSP00000251038 | ENSP00000313921 |
| ENSP00000251038 | ENSP00000314004 |
| ENSP00000251038 | ENSP00000314073 |

|                 |                 |
|-----------------|-----------------|
| ENSP00000251038 | ENSP00000314441 |
| ENSP00000251038 | ENSP00000315017 |
| ENSP00000251038 | ENSP00000315379 |
| ENSP00000251038 | ENSP00000315644 |
| ENSP00000251038 | ENSP00000315674 |
| ENSP00000251038 | ENSP00000315693 |
| ENSP00000251038 | ENSP00000315791 |
| ENSP00000251038 | ENSP00000316032 |
| ENSP00000251038 | ENSP00000316854 |
| ENSP00000251038 | ENSP00000316879 |
| ENSP00000251038 | ENSP00000317159 |
| ENSP00000251038 | ENSP00000317780 |
| ENSP00000251038 | ENSP00000317872 |
| ENSP00000251038 | ENSP00000318195 |
| ENSP00000251038 | ENSP00000318318 |
| ENSP00000251038 | ENSP00000318374 |
| ENSP00000251038 | ENSP00000318604 |
| ENSP00000251038 | ENSP00000318775 |
| ENSP00000251038 | ENSP00000319531 |
| ENSP00000251038 | ENSP00000320885 |
| ENSP00000251038 | ENSP00000321449 |
| ENSP00000251038 | ENSP00000321617 |
| ENSP00000251038 | ENSP00000321636 |
| ENSP00000251038 | ENSP00000321810 |
| ENSP00000251038 | ENSP00000322170 |
| ENSP00000251038 | ENSP00000322242 |
| ENSP00000251038 | ENSP00000322316 |
| ENSP00000251038 | ENSP00000322570 |
| ENSP00000251038 | ENSP00000323377 |
| ENSP00000251038 | ENSP00000323439 |
| ENSP00000251038 | ENSP00000324122 |
| ENSP00000251038 | ENSP00000324124 |
| ENSP00000251038 | ENSP00000324491 |
| ENSP00000251038 | ENSP00000325002 |
| ENSP00000251038 | ENSP00000325017 |
| ENSP00000251038 | ENSP00000325421 |
| ENSP00000251038 | ENSP00000325562 |
| ENSP00000251038 | ENSP00000325655 |
| ENSP00000251038 | ENSP00000325677 |
| ENSP00000251038 | ENSP00000325919 |
| ENSP00000251038 | ENSP00000326261 |
| ENSP00000251038 | ENSP00000326514 |
| ENSP00000251038 | ENSP00000326806 |
| ENSP00000251038 | ENSP00000326813 |
| ENSP00000251038 | ENSP00000327070 |
| ENSP00000251038 | ENSP00000327179 |

|                 |                 |
|-----------------|-----------------|
| ENSP00000251038 | ENSP00000327436 |
| ENSP00000251038 | ENSP00000327716 |
| ENSP00000251038 | ENSP00000327821 |
| ENSP00000251038 | ENSP00000328023 |
| ENSP00000251038 | ENSP00000328690 |
| ENSP00000251038 | ENSP00000329029 |
| ENSP00000251038 | ENSP00000329466 |
| ENSP00000251038 | ENSP00000329553 |
| ENSP00000251038 | ENSP00000329933 |
| ENSP00000251038 | ENSP00000330408 |
| ENSP00000251038 | ENSP00000330730 |
| ENSP00000251038 | ENSP00000331310 |
| ENSP00000251038 | ENSP00000331369 |
| ENSP00000251038 | ENSP00000331487 |
| ENSP00000251038 | ENSP00000331817 |
| ENSP00000251038 | ENSP00000331849 |
| ENSP00000251038 | ENSP00000331879 |
| ENSP00000251038 | ENSP00000332444 |
| ENSP00000251038 | ENSP00000332721 |
| ENSP00000251038 | ENSP00000333401 |
| ENSP00000251038 | ENSP00000333666 |
| ENSP00000251038 | ENSP00000333813 |
| ENSP00000251038 | ENSP00000333837 |
| ENSP00000251038 | ENSP00000334100 |
| ENSP00000251038 | ENSP00000334188 |
| ENSP00000251038 | ENSP00000335041 |
| ENSP00000251038 | ENSP00000335304 |
| ENSP00000251038 | ENSP00000335357 |
| ENSP00000251038 | ENSP00000336712 |
| ENSP00000251038 | ENSP00000337127 |
| ENSP00000251038 | ENSP00000337353 |
| ENSP00000251038 | ENSP00000337358 |
| ENSP00000251038 | ENSP00000337405 |
| ENSP00000251038 | ENSP00000337839 |
| ENSP00000251038 | ENSP00000339245 |
| ENSP00000251038 | ENSP00000339435 |
| ENSP00000251038 | ENSP00000339844 |
| ENSP00000251038 | ENSP00000339881 |
| ENSP00000251038 | ENSP00000340019 |
| ENSP00000251038 | ENSP00000340093 |
| ENSP00000251038 | ENSP00000340281 |
| ENSP00000251038 | ENSP00000340427 |
| ENSP00000251038 | ENSP00000340823 |
| ENSP00000251038 | ENSP00000341382 |
| ENSP00000251038 | ENSP00000341538 |
| ENSP00000251038 | ENSP00000341692 |

|                 |                 |
|-----------------|-----------------|
| ENSP00000251038 | ENSP00000341885 |
| ENSP00000251038 | ENSP00000342026 |
| ENSP00000251038 | ENSP00000342121 |
| ENSP00000251038 | ENSP00000342181 |
| ENSP00000251038 | ENSP00000343313 |
| ENSP00000251038 | ENSP00000343392 |
| ENSP00000251038 | ENSP00000343526 |
| ENSP00000251038 | ENSP00000343535 |
| ENSP00000251038 | ENSP00000343741 |
| ENSP00000251038 | ENSP00000343943 |
| ENSP00000251038 | ENSP00000344055 |
| ENSP00000251038 | ENSP00000344393 |
| ENSP00000251038 | ENSP00000344456 |
| ENSP00000251038 | ENSP00000344460 |
| ENSP00000251038 | ENSP00000345702 |
| ENSP00000251038 | ENSP00000346015 |
| ENSP00000251038 | ENSP00000346037 |
| ENSP00000251038 | ENSP00000346155 |
| ENSP00000251038 | ENSP00000346173 |
| ENSP00000251038 | ENSP00000346236 |
| ENSP00000251038 | ENSP00000346255 |
| ENSP00000251038 | ENSP00000347324 |
| ENSP00000251038 | ENSP00000347602 |
| ENSP00000251038 | ENSP00000347719 |
| ENSP00000251038 | ENSP00000347836 |
| ENSP00000251038 | ENSP00000347919 |
| ENSP00000251038 | ENSP00000347978 |
| ENSP00000251038 | ENSP00000348010 |
| ENSP00000251038 | ENSP00000348107 |
| ENSP00000251038 | ENSP00000348168 |
| ENSP00000251038 | ENSP00000348442 |
| ENSP00000251038 | ENSP00000348762 |
| ENSP00000251038 | ENSP00000348933 |
| ENSP00000251038 | ENSP00000349142 |
| ENSP00000251038 | ENSP00000349213 |
| ENSP00000251038 | ENSP00000349393 |
| ENSP00000251038 | ENSP00000349887 |
| ENSP00000251038 | ENSP00000349959 |
| ENSP00000251038 | ENSP00000349970 |
| ENSP00000251038 | ENSP00000350011 |
| ENSP00000251038 | ENSP00000350098 |
| ENSP00000251038 | ENSP00000350263 |
| ENSP00000251038 | ENSP00000350409 |
| ENSP00000251038 | ENSP00000350512 |
| ENSP00000251038 | ENSP00000350757 |
| ENSP00000251038 | ENSP00000351100 |

|                 |                 |
|-----------------|-----------------|
| ENSP00000251038 | ENSP00000351170 |
| ENSP00000251038 | ENSP00000351214 |
| ENSP00000251038 | ENSP00000352400 |
| ENSP00000251038 | ENSP00000353010 |
| ENSP00000251038 | ENSP00000353073 |
| ENSP00000251038 | ENSP00000353246 |
| ENSP00000251038 | ENSP00000353575 |
| ENSP00000251038 | ENSP00000353622 |
| ENSP00000251038 | ENSP00000353793 |
| ENSP00000251038 | ENSP00000353904 |
| ENSP00000251038 | ENSP00000354125 |
| ENSP00000251038 | ENSP00000354340 |
| ENSP00000251038 | ENSP00000354532 |
| ENSP00000251038 | ENSP00000354673 |
| ENSP00000251038 | ENSP00000354720 |
| ENSP00000251038 | ENSP00000354742 |
| ENSP00000251038 | ENSP00000354916 |
| ENSP00000251038 | ENSP00000355013 |
| ENSP00000251038 | ENSP00000355051 |
| ENSP00000251038 | ENSP00000355205 |
| ENSP00000251038 | ENSP00000355536 |
| ENSP00000251038 | ENSP00000355541 |
| ENSP00000251038 | ENSP00000355672 |
| ENSP00000251038 | ENSP00000355884 |
| ENSP00000251038 | ENSP00000355890 |
| ENSP00000251038 | ENSP00000356146 |
| ENSP00000251038 | ENSP00000356231 |
| ENSP00000251038 | ENSP00000356263 |
| ENSP00000251038 | ENSP00000356405 |
| ENSP00000251038 | ENSP00000356448 |
| ENSP00000251038 | ENSP00000356470 |
| ENSP00000251038 | ENSP00000356476 |
| ENSP00000251038 | ENSP00000356602 |
| ENSP00000251038 | ENSP00000356811 |
| ENSP00000251038 | ENSP00000356988 |
| ENSP00000251038 | ENSP00000356989 |
| ENSP00000251038 | ENSP00000357048 |
| ENSP00000251038 | ENSP00000357602 |
| ENSP00000251038 | ENSP00000357829 |
| ENSP00000251038 | ENSP00000357973 |
| ENSP00000251038 | ENSP00000357998 |
| ENSP00000251038 | ENSP00000358140 |
| ENSP00000251038 | ENSP00000358146 |
| ENSP00000251038 | ENSP00000358400 |
| ENSP00000251038 | ENSP00000358491 |
| ENSP00000251038 | ENSP00000358497 |



|                 |                 |
|-----------------|-----------------|
| ENSP00000251038 | ENSP00000358737 |
| ENSP00000251038 | ENSP00000358812 |
| ENSP00000251038 | ENSP00000359127 |
| ENSP00000251038 | ENSP00000359211 |
| ENSP00000251038 | ENSP00000359224 |
| ENSP00000251038 | ENSP00000359290 |
| ENSP00000251038 | ENSP00000359305 |
| ENSP00000251038 | ENSP00000359518 |
| ENSP00000251038 | ENSP00000359688 |
| ENSP00000251038 | ENSP00000359837 |
| ENSP00000251038 | ENSP00000359904 |
| ENSP00000251038 | ENSP00000360183 |
| ENSP00000251038 | ENSP00000360270 |
| ENSP00000251038 | ENSP00000360286 |
| ENSP00000251038 | ENSP00000360437 |
| ENSP00000251038 | ENSP00000360473 |
| ENSP00000251038 | ENSP00000360498 |
| ENSP00000251038 | ENSP00000360645 |
| ENSP00000251038 | ENSP00000360676 |
| ENSP00000251038 | ENSP00000360782 |
| ENSP00000251038 | ENSP00000361005 |
| ENSP00000251038 | ENSP00000361047 |
| ENSP00000251038 | ENSP00000361057 |
| ENSP00000251038 | ENSP00000361064 |
| ENSP00000251038 | ENSP00000361186 |
| ENSP00000251038 | ENSP00000361642 |
| ENSP00000251038 | ENSP00000361686 |
| ENSP00000251038 | ENSP00000361949 |
| ENSP00000251038 | ENSP00000362036 |
| ENSP00000251038 | ENSP00000362166 |
| ENSP00000251038 | ENSP00000362208 |
| ENSP00000251038 | ENSP00000362334 |
| ENSP00000251038 | ENSP00000362456 |
| ENSP00000251038 | ENSP00000362463 |
| ENSP00000251038 | ENSP00000362546 |
| ENSP00000251038 | ENSP00000362688 |
| ENSP00000251038 | ENSP00000362807 |
| ENSP00000251038 | ENSP00000362900 |
| ENSP00000251038 | ENSP00000363162 |
| ENSP00000251038 | ENSP00000363384 |
| ENSP00000251038 | ENSP00000363944 |
| ENSP00000251038 | ENSP00000364037 |
| ENSP00000251038 | ENSP00000364270 |
| ENSP00000251038 | ENSP00000364289 |
| ENSP00000251038 | ENSP00000364320 |
| ENSP00000251038 | ENSP00000364649 |

|                 |                 |
|-----------------|-----------------|
| ENSP00000251038 | ENSP00000365388 |
| ENSP00000251038 | ENSP00000365773 |
| ENSP00000251038 | ENSP00000365775 |
| ENSP00000251038 | ENSP00000365830 |
| ENSP00000251038 | ENSP00000365908 |
| ENSP00000251038 | ENSP00000366030 |
| ENSP00000251038 | ENSP00000366135 |
| ENSP00000251038 | ENSP00000366156 |
| ENSP00000251038 | ENSP00000366557 |
| ENSP00000251038 | ENSP00000366565 |
| ENSP00000251038 | ENSP00000366672 |
| ENSP00000251038 | ENSP00000367835 |
| ENSP00000251038 | ENSP00000367923 |
| ENSP00000251038 | ENSP00000367934 |
| ENSP00000251038 | ENSP00000368140 |
| ENSP00000251038 | ENSP00000368165 |
| ENSP00000251038 | ENSP00000368305 |
| ENSP00000251038 | ENSP00000368468 |
| ENSP00000251038 | ENSP00000368565 |
| ENSP00000251038 | ENSP00000368801 |
| ENSP00000251038 | ENSP00000368927 |
| ENSP00000251038 | ENSP00000368959 |
| ENSP00000251038 | ENSP00000368984 |
| ENSP00000251038 | ENSP00000369042 |
| ENSP00000251038 | ENSP00000369335 |
| ENSP00000251038 | ENSP00000369519 |
| ENSP00000251038 | ENSP00000369736 |
| ENSP00000251038 | ENSP00000369860 |
| ENSP00000251038 | ENSP00000369897 |
| ENSP00000251038 | ENSP00000370150 |
| ENSP00000251038 | ENSP00000370222 |
| ENSP00000251038 | ENSP00000370377 |
| ENSP00000251038 | ENSP00000370460 |
| ENSP00000251038 | ENSP00000370718 |
| ENSP00000251038 | ENSP00000370736 |
| ENSP00000251038 | ENSP00000370741 |
| ENSP00000251038 | ENSP00000370748 |
| ENSP00000251038 | ENSP00000370930 |
| ENSP00000251038 | ENSP00000371101 |
| ENSP00000251038 | ENSP00000371155 |
| ENSP00000251038 | ENSP00000371236 |
| ENSP00000251038 | ENSP00000371388 |
| ENSP00000251038 | ENSP00000371451 |
| ENSP00000251038 | ENSP00000371475 |
| ENSP00000251038 | ENSP00000371546 |
| ENSP00000251038 | ENSP00000371888 |

|                 |                 |
|-----------------|-----------------|
| ENSP00000251038 | ENSP00000372202 |
| ENSP00000251038 | ENSP00000372326 |
| ENSP00000251038 | ENSP00000372689 |
| ENSP00000251038 | ENSP00000373474 |
| ENSP00000251038 | ENSP00000373715 |
| ENSP00000251038 | ENSP00000373979 |
| ENSP00000251038 | ENSP00000374152 |
| ENSP00000251038 | ENSP00000374213 |
| ENSP00000251038 | ENSP00000375730 |
| ENSP00000251038 | ENSP00000375809 |
| ENSP00000251038 | ENSP00000375881 |
| ENSP00000251038 | ENSP00000377040 |
| ENSP00000251038 | ENSP00000377401 |
| ENSP00000251038 | ENSP00000377446 |
| ENSP00000251038 | ENSP00000377486 |
| ENSP00000251038 | ENSP00000377969 |
| ENSP00000251038 | ENSP00000378350 |
| ENSP00000251038 | ENSP00000378782 |
| ENSP00000251038 | ENSP00000378890 |
| ENSP00000251038 | ENSP00000379372 |
| ENSP00000251038 | ENSP00000379607 |
| ENSP00000251038 | ENSP00000379933 |
| ENSP00000251038 | ENSP00000380431 |
| ENSP00000251038 | ENSP00000380982 |
| ENSP00000251038 | ENSP00000381045 |
| ENSP00000251038 | ENSP00000381293 |
| ENSP00000251038 | ENSP00000381461 |
| ENSP00000251038 | ENSP00000381657 |
| ENSP00000251038 | ENSP00000381970 |
| ENSP00000251038 | ENSP00000382250 |
| ENSP00000251038 | ENSP00000382595 |
| ENSP00000251038 | ENSP00000382779 |
| ENSP00000251038 | ENSP00000383719 |
| ENSP00000251038 | ENSP00000383911 |
| ENSP00000251038 | ENSP00000384597 |
| ENSP00000251038 | ENSP00000386394 |
| ENSP00000251038 | ENSP00000386759 |
| ENSP00000251038 | ENSP00000387219 |
| ENSP00000251038 | ENSP00000387262 |
| ENSP00000251038 | ENSP00000387471 |
| ENSP00000251038 | ENSP00000391457 |
| ENSP00000251038 | ENSP00000391723 |
| ENSP00000251038 | ENSP00000394791 |
| ENSP00000251038 | ENSP00000394869 |
| ENSP00000251038 | ENSP00000396452 |
| ENSP00000251038 | ENSP00000396704 |

|                 |                 |
|-----------------|-----------------|
| ENSP00000251038 | ENSP00000396937 |
| ENSP00000251038 | ENSP00000397441 |
| ENSP00000251038 | ENSP00000397759 |
| ENSP00000251038 | ENSP00000398789 |
| ENSP00000251038 | ENSP00000401018 |
| ENSP00000251038 | ENSP00000401371 |
| ENSP00000251038 | ENSP00000401435 |
| ENSP00000251038 | ENSP00000402240 |
| ENSP00000251038 | ENSP00000402527 |
| ENSP00000251038 | ENSP00000402935 |
| ENSP00000251038 | ENSP00000403852 |
| ENSP00000251038 | ENSP00000406490 |
| ENSP00000251038 | ENSP00000410396 |
| ENSP00000251038 | ENSP00000410833 |
| ENSP00000251038 | ENSP00000412922 |
| ENSP00000251038 | ENSP00000413625 |
| ENSP00000251038 | ENSP00000414066 |
| ENSP00000251038 | ENSP00000414786 |
| ENSP00000251038 | ENSP00000417229 |
| ENSP00000251038 | ENSP00000418348 |
| ENSP00000251038 | ENSP00000419628 |
| ENSP00000251038 | ENSP00000420357 |
| ENSP00000251038 | ENSP00000420608 |
| ENSP00000251038 | ENSP00000420714 |
| ENSP00000251074 | ENSP00000253003 |
| ENSP00000251074 | ENSP00000256398 |
| ENSP00000251074 | ENSP00000261396 |
| ENSP00000251074 | ENSP00000261531 |
| ENSP00000251074 | ENSP00000261601 |
| ENSP00000251074 | ENSP00000282892 |
| ENSP00000251074 | ENSP00000283882 |
| ENSP00000251074 | ENSP00000298937 |
| ENSP00000251074 | ENSP00000299601 |
| ENSP00000251074 | ENSP00000304593 |
| ENSP00000251074 | ENSP00000342262 |
| ENSP00000251074 | ENSP00000357907 |
| ENSP00000251074 | ENSP00000360473 |
| ENSP00000251074 | ENSP00000360515 |
| ENSP00000251074 | ENSP00000360621 |
| ENSP00000251074 | ENSP00000363779 |
| ENSP00000251074 | ENSP00000368565 |
| ENSP00000251074 | ENSP00000386759 |
| ENSP00000251074 | ENSP00000396937 |
| ENSP00000251076 | ENSP00000251363 |
| ENSP00000251076 | ENSP00000253413 |
| ENSP00000251076 | ENSP00000254442 |

|                 |                 |
|-----------------|-----------------|
| ENSP00000251076 | ENSP00000264158 |
| ENSP00000251076 | ENSP00000272238 |
| ENSP00000251076 | ENSP00000273398 |
| ENSP00000251076 | ENSP00000277865 |
| ENSP00000251076 | ENSP00000290949 |
| ENSP00000251076 | ENSP00000303208 |
| ENSP00000251076 | ENSP00000308496 |
| ENSP00000251076 | ENSP00000336724 |
| ENSP00000251076 | ENSP00000344223 |
| ENSP00000251076 | ENSP00000349131 |
| ENSP00000251076 | ENSP00000360183 |
| ENSP00000251076 | ENSP00000363162 |
| ENSP00000251076 | ENSP00000365233 |
| ENSP00000251076 | ENSP00000365943 |
| ENSP00000251076 | ENSP00000397441 |
| ENSP00000251089 | ENSP00000263629 |
| ENSP00000251089 | ENSP00000263736 |
| ENSP00000251089 | ENSP00000276072 |
| ENSP00000251089 | ENSP00000296509 |
| ENSP00000251089 | ENSP00000319104 |
| ENSP00000251089 | ENSP00000351284 |
| ENSP00000251089 | ENSP00000354673 |
| ENSP00000251089 | ENSP00000356405 |
| ENSP00000251089 | ENSP00000360515 |
| ENSP00000251089 | ENSP00000368438 |
| ENSP00000251089 | ENSP00000369965 |
| ENSP00000251102 | ENSP00000255266 |
| ENSP00000251102 | ENSP00000259953 |
| ENSP00000251102 | ENSP00000261170 |
| ENSP00000251102 | ENSP00000272602 |
| ENSP00000251102 | ENSP00000326261 |
| ENSP00000251102 | ENSP00000397755 |
| ENSP00000251102 | ENSP00000398752 |
| ENSP00000251102 | ENSP00000409285 |
| ENSP00000251108 | ENSP00000260810 |
| ENSP00000251108 | ENSP00000265140 |
| ENSP00000251108 | ENSP00000295030 |
| ENSP00000251108 | ENSP00000364270 |
| ENSP00000251127 | ENSP00000255380 |
| ENSP00000251127 | ENSP00000311200 |
| ENSP00000251127 | ENSP00000396704 |
| ENSP00000251166 | ENSP00000262306 |
| ENSP00000251166 | ENSP00000268957 |
| ENSP00000251166 | ENSP00000284811 |
| ENSP00000251289 | ENSP00000257789 |
| ENSP00000251289 | ENSP00000260810 |

|                 |                 |
|-----------------|-----------------|
| ENSP00000251289 | ENSP00000261531 |
| ENSP00000251289 | ENSP00000265056 |
| ENSP00000251289 | ENSP00000265140 |
| ENSP00000251289 | ENSP00000268661 |
| ENSP00000251289 | ENSP00000281708 |
| ENSP00000251289 | ENSP00000282388 |
| ENSP00000251289 | ENSP00000301962 |
| ENSP00000251289 | ENSP00000302886 |
| ENSP00000251289 | ENSP00000312870 |
| ENSP00000251289 | ENSP00000323858 |
| ENSP00000251289 | ENSP00000329466 |
| ENSP00000251289 | ENSP00000338573 |
| ENSP00000251289 | ENSP00000339145 |
| ENSP00000251289 | ENSP00000339795 |
| ENSP00000251289 | ENSP00000339826 |
| ENSP00000251289 | ENSP00000346725 |
| ENSP00000251289 | ENSP00000348596 |
| ENSP00000251289 | ENSP00000351947 |
| ENSP00000251289 | ENSP00000353246 |
| ENSP00000251289 | ENSP00000354040 |
| ENSP00000251289 | ENSP00000358400 |
| ENSP00000251289 | ENSP00000360412 |
| ENSP00000251289 | ENSP00000360532 |
| ENSP00000251289 | ENSP00000360621 |
| ENSP00000251289 | ENSP00000362153 |
| ENSP00000251289 | ENSP00000363384 |
| ENSP00000251289 | ENSP00000363559 |
| ENSP00000251289 | ENSP00000363944 |
| ENSP00000251289 | ENSP00000364037 |
| ENSP00000251289 | ENSP00000364320 |
| ENSP00000251289 | ENSP00000366934 |
| ENSP00000251289 | ENSP00000368612 |
| ENSP00000251289 | ENSP00000370258 |
| ENSP00000251289 | ENSP00000372023 |
| ENSP00000251289 | ENSP00000379607 |
| ENSP00000251296 | ENSP00000295959 |
| ENSP00000251296 | ENSP00000341138 |
| ENSP00000251296 | ENSP00000403383 |
| ENSP00000251303 | ENSP00000261712 |
| ENSP00000251303 | ENSP00000262193 |
| ENSP00000251303 | ENSP00000262854 |
| ENSP00000251303 | ENSP00000268379 |
| ENSP00000251303 | ENSP00000277554 |
| ENSP00000251303 | ENSP00000281950 |
| ENSP00000251303 | ENSP00000293362 |
| ENSP00000251303 | ENSP00000294008 |

|                 |                 |
|-----------------|-----------------|
| ENSP00000251303 | ENSP00000295901 |
| ENSP00000251303 | ENSP00000298139 |
| ENSP00000251303 | ENSP00000307853 |
| ENSP00000251303 | ENSP00000317039 |
| ENSP00000251303 | ENSP00000317232 |
| ENSP00000251303 | ENSP00000317636 |
| ENSP00000251303 | ENSP00000321636 |
| ENSP00000251303 | ENSP00000321706 |
| ENSP00000251303 | ENSP00000323439 |
| ENSP00000251303 | ENSP00000326519 |
| ENSP00000251303 | ENSP00000335557 |
| ENSP00000251303 | ENSP00000339897 |
| ENSP00000251303 | ENSP00000341382 |
| ENSP00000251303 | ENSP00000347232 |
| ENSP00000251303 | ENSP00000351284 |
| ENSP00000251303 | ENSP00000354720 |
| ENSP00000251303 | ENSP00000354957 |
| ENSP00000251303 | ENSP00000358716 |
| ENSP00000251303 | ENSP00000362334 |
| ENSP00000251303 | ENSP00000365588 |
| ENSP00000251303 | ENSP00000365766 |
| ENSP00000251303 | ENSP00000373060 |
| ENSP00000251303 | ENSP00000384048 |
| ENSP00000251303 | ENSP00000387429 |
| ENSP00000251303 | ENSP00000396484 |
| ENSP00000251303 | ENSP00000404318 |
| ENSP00000251303 | ENSP00000409167 |
| ENSP00000251303 | ENSP00000415212 |
| ENSP00000251303 | ENSP00000416511 |
| ENSP00000251363 | ENSP00000262982 |
| ENSP00000251363 | ENSP00000265351 |
| ENSP00000251363 | ENSP00000337688 |
| ENSP00000251363 | ENSP00000342609 |
| ENSP00000251363 | ENSP00000356989 |
| ENSP00000251363 | ENSP00000362298 |
| ENSP00000251496 | ENSP00000260731 |
| ENSP00000251496 | ENSP00000261531 |
| ENSP00000251496 | ENSP00000263795 |
| ENSP00000251496 | ENSP00000265195 |
| ENSP00000251496 | ENSP00000296930 |
| ENSP00000251496 | ENSP00000297338 |
| ENSP00000251496 | ENSP00000308699 |
| ENSP00000251496 | ENSP00000325017 |
| ENSP00000251496 | ENSP00000341243 |
| ENSP00000251496 | ENSP00000341382 |
| ENSP00000251496 | ENSP00000354720 |

|                 |                 |
|-----------------|-----------------|
| ENSP00000251496 | ENSP00000355759 |
| ENSP00000251496 | ENSP00000357440 |
| ENSP00000251496 | ENSP00000367787 |
| ENSP00000251588 | ENSP00000283027 |
| ENSP00000251588 | ENSP00000387471 |
| ENSP00000251607 | ENSP00000254037 |
| ENSP00000251607 | ENSP00000261326 |
| ENSP00000251607 | ENSP00000265963 |
| ENSP00000251607 | ENSP00000296802 |
| ENSP00000251607 | ENSP00000312224 |
| ENSP00000251607 | ENSP00000314348 |
| ENSP00000251607 | ENSP00000327821 |
| ENSP00000251607 | ENSP00000336842 |
| ENSP00000251607 | ENSP00000339532 |
| ENSP00000251607 | ENSP00000343557 |
| ENSP00000251607 | ENSP00000352678 |
| ENSP00000251607 | ENSP00000358716 |
| ENSP00000251607 | ENSP00000366672 |
| ENSP00000251607 | ENSP00000379888 |
| ENSP00000251607 | ENSP00000393953 |
| ENSP00000251630 | ENSP00000356191 |
| ENSP00000251630 | ENSP00000363571 |
| ENSP00000251691 | ENSP00000324444 |
| ENSP00000251775 | ENSP00000251968 |
| ENSP00000251775 | ENSP00000258654 |
| ENSP00000251775 | ENSP00000259512 |
| ENSP00000251775 | ENSP00000262039 |
| ENSP00000251775 | ENSP00000265990 |
| ENSP00000251775 | ENSP00000267484 |
| ENSP00000251775 | ENSP00000269122 |
| ENSP00000251775 | ENSP00000272322 |
| ENSP00000251775 | ENSP00000272444 |
| ENSP00000251775 | ENSP00000280346 |
| ENSP00000251775 | ENSP00000281187 |
| ENSP00000251775 | ENSP00000283351 |
| ENSP00000251775 | ENSP00000288828 |
| ENSP00000251775 | ENSP00000295030 |
| ENSP00000251775 | ENSP00000305459 |
| ENSP00000251775 | ENSP00000314615 |
| ENSP00000251775 | ENSP00000330393 |
| ENSP00000251775 | ENSP00000337838 |
| ENSP00000251775 | ENSP00000343741 |
| ENSP00000251775 | ENSP00000344106 |
| ENSP00000251775 | ENSP00000347581 |
| ENSP00000251775 | ENSP00000355231 |
| ENSP00000251775 | ENSP00000358497 |



|                 |                 |
|-----------------|-----------------|
| ENSP00000251775 | ENSP00000365567 |
| ENSP00000251775 | ENSP00000368698 |
| ENSP00000251775 | ENSP00000368927 |
| ENSP00000251775 | ENSP00000377665 |
| ENSP00000251775 | ENSP00000397441 |
| ENSP00000251809 | ENSP00000252487 |
| ENSP00000251809 | ENSP00000262265 |
| ENSP00000251809 | ENSP00000280350 |
| ENSP00000251809 | ENSP00000298292 |
| ENSP00000251822 | ENSP00000253339 |
| ENSP00000251822 | ENSP00000253861 |
| ENSP00000251822 | ENSP00000322957 |
| ENSP00000251822 | ENSP00000355511 |
| ENSP00000251822 | ENSP00000361120 |
| ENSP00000251822 | ENSP00000394071 |
| ENSP00000251864 | ENSP00000255324 |
| ENSP00000251864 | ENSP00000256594 |
| ENSP00000251864 | ENSP00000263116 |
| ENSP00000251864 | ENSP00000263277 |
| ENSP00000251864 | ENSP00000269122 |
| ENSP00000251864 | ENSP00000277865 |
| ENSP00000251864 | ENSP00000282050 |
| ENSP00000251864 | ENSP00000294848 |
| ENSP00000251864 | ENSP00000296218 |
| ENSP00000251864 | ENSP00000297185 |
| ENSP00000251864 | ENSP00000299767 |
| ENSP00000251864 | ENSP00000303129 |
| ENSP00000251864 | ENSP00000306099 |
| ENSP00000251864 | ENSP00000317334 |
| ENSP00000251864 | ENSP00000325136 |
| ENSP00000251864 | ENSP00000331897 |
| ENSP00000251864 | ENSP00000340019 |
| ENSP00000251864 | ENSP00000347087 |
| ENSP00000251864 | ENSP00000348886 |
| ENSP00000251864 | ENSP00000349208 |
| ENSP00000251864 | ENSP00000349594 |
| ENSP00000251864 | ENSP00000356846 |
| ENSP00000251864 | ENSP00000357812 |
| ENSP00000251864 | ENSP00000370023 |
| ENSP00000251864 | ENSP00000378368 |
| ENSP00000251864 | ENSP00000381461 |
| ENSP00000251864 | ENSP00000384900 |
| ENSP00000251864 | ENSP00000387303 |
| ENSP00000251864 | ENSP00000393275 |
| ENSP00000251864 | ENSP00000396937 |
| ENSP00000251864 | ENSP00000404232 |

|                 |                 |
|-----------------|-----------------|
| ENSP00000251871 | ENSP00000255764 |
| ENSP00000251871 | ENSP00000256379 |
| ENSP00000251871 | ENSP00000258648 |
| ENSP00000251871 | ENSP00000260947 |
| ENSP00000251871 | ENSP00000261884 |
| ENSP00000251871 | ENSP00000263121 |
| ENSP00000251871 | ENSP00000263205 |
| ENSP00000251871 | ENSP00000263377 |
| ENSP00000251871 | ENSP00000263390 |
| ENSP00000251871 | ENSP00000264160 |
| ENSP00000251871 | ENSP00000264637 |
| ENSP00000251871 | ENSP00000264718 |
| ENSP00000251871 | ENSP00000265175 |
| ENSP00000251871 | ENSP00000265350 |
| ENSP00000251871 | ENSP00000267064 |
| ENSP00000251871 | ENSP00000268058 |
| ENSP00000251871 | ENSP00000268711 |
| ENSP00000251871 | ENSP00000277541 |
| ENSP00000251871 | ENSP00000280190 |
| ENSP00000251871 | ENSP00000281928 |
| ENSP00000251871 | ENSP00000282007 |
| ENSP00000251871 | ENSP00000282892 |
| ENSP00000251871 | ENSP00000286317 |
| ENSP00000251871 | ENSP00000290663 |
| ENSP00000251871 | ENSP00000292035 |
| ENSP00000251871 | ENSP00000293777 |
| ENSP00000251871 | ENSP00000295025 |
| ENSP00000251871 | ENSP00000297347 |
| ENSP00000251871 | ENSP00000299543 |
| ENSP00000251871 | ENSP00000300651 |
| ENSP00000251871 | ENSP00000304185 |
| ENSP00000251871 | ENSP00000308759 |
| ENSP00000251871 | ENSP00000312778 |
| ENSP00000251871 | ENSP00000316578 |
| ENSP00000251871 | ENSP00000323720 |
| ENSP00000251871 | ENSP00000325612 |
| ENSP00000251871 | ENSP00000326128 |
| ENSP00000251871 | ENSP00000326767 |
| ENSP00000251871 | ENSP00000336750 |
| ENSP00000251871 | ENSP00000337340 |
| ENSP00000251871 | ENSP00000342343 |
| ENSP00000251871 | ENSP00000344456 |
| ENSP00000251871 | ENSP00000347733 |
| ENSP00000251871 | ENSP00000348069 |
| ENSP00000251871 | ENSP00000348610 |
| ENSP00000251871 | ENSP00000350283 |

|                 |                 |
|-----------------|-----------------|
| ENSP00000251871 | ENSP00000354951 |
| ENSP00000251871 | ENSP00000355759 |
| ENSP00000251871 | ENSP00000357047 |
| ENSP00000251871 | ENSP00000357440 |
| ENSP00000251871 | ENSP00000357907 |
| ENSP00000251871 | ENSP00000360371 |
| ENSP00000251871 | ENSP00000360515 |
| ENSP00000251871 | ENSP00000362948 |
| ENSP00000251871 | ENSP00000363193 |
| ENSP00000251871 | ENSP00000381216 |
| ENSP00000251871 | ENSP00000384048 |
| ENSP00000251871 | ENSP00000391774 |
| ENSP00000251871 | ENSP00000392617 |
| ENSP00000251871 | ENSP00000418734 |
| ENSP00000251900 | ENSP00000260956 |
| ENSP00000251900 | ENSP00000269197 |
| ENSP00000251900 | ENSP00000269385 |
| ENSP00000251900 | ENSP00000272286 |
| ENSP00000251900 | ENSP00000314311 |
| ENSP00000251900 | ENSP00000343535 |
| ENSP00000251900 | ENSP00000354995 |
| ENSP00000251900 | ENSP00000364839 |
| ENSP00000251900 | ENSP00000364895 |
| ENSP00000251900 | ENSP00000366974 |
| ENSP00000251900 | ENSP00000376204 |
| ENSP00000251900 | ENSP00000384490 |
| ENSP00000251968 | ENSP00000252699 |
| ENSP00000251968 | ENSP00000253794 |
| ENSP00000251968 | ENSP00000254816 |
| ENSP00000251968 | ENSP00000260187 |
| ENSP00000251968 | ENSP00000260363 |
| ENSP00000251968 | ENSP00000261531 |
| ENSP00000251968 | ENSP00000262056 |
| ENSP00000251968 | ENSP00000262305 |
| ENSP00000251968 | ENSP00000262803 |
| ENSP00000251968 | ENSP00000262812 |
| ENSP00000251968 | ENSP00000263856 |
| ENSP00000251968 | ENSP00000264380 |
| ENSP00000251968 | ENSP00000264926 |
| ENSP00000251968 | ENSP00000265175 |
| ENSP00000251968 | ENSP00000265316 |
| ENSP00000251968 | ENSP00000265562 |
| ENSP00000251968 | ENSP00000266000 |
| ENSP00000251968 | ENSP00000267064 |
| ENSP00000251968 | ENSP00000268182 |
| ENSP00000251968 | ENSP00000280346 |

|                 |                 |
|-----------------|-----------------|
| ENSP00000251968 | ENSP00000284629 |
| ENSP00000251968 | ENSP00000286428 |
| ENSP00000251968 | ENSP00000288199 |
| ENSP00000251968 | ENSP00000290330 |
| ENSP00000251968 | ENSP00000292363 |
| ENSP00000251968 | ENSP00000295030 |
| ENSP00000251968 | ENSP00000295899 |
| ENSP00000251968 | ENSP00000297661 |
| ENSP00000251968 | ENSP00000300417 |
| ENSP00000251968 | ENSP00000301765 |
| ENSP00000251968 | ENSP00000302239 |
| ENSP00000251968 | ENSP00000302955 |
| ENSP00000251968 | ENSP00000303507 |
| ENSP00000251968 | ENSP00000303511 |
| ENSP00000251968 | ENSP00000304102 |
| ENSP00000251968 | ENSP00000304592 |
| ENSP00000251968 | ENSP00000307275 |
| ENSP00000251968 | ENSP00000307387 |
| ENSP00000251968 | ENSP00000310440 |
| ENSP00000251968 | ENSP00000312697 |
| ENSP00000251968 | ENSP00000313881 |
| ENSP00000251968 | ENSP00000317468 |
| ENSP00000251968 | ENSP00000318629 |
| ENSP00000251968 | ENSP00000320885 |
| ENSP00000251968 | ENSP00000328203 |
| ENSP00000251968 | ENSP00000331201 |
| ENSP00000251968 | ENSP00000333836 |
| ENSP00000251968 | ENSP00000334657 |
| ENSP00000251968 | ENSP00000342300 |
| ENSP00000251968 | ENSP00000342755 |
| ENSP00000251968 | ENSP00000345530 |
| ENSP00000251968 | ENSP00000348573 |
| ENSP00000251968 | ENSP00000349078 |
| ENSP00000251968 | ENSP00000349486 |
| ENSP00000251968 | ENSP00000349748 |
| ENSP00000251968 | ENSP00000350990 |
| ENSP00000251968 | ENSP00000352175 |
| ENSP00000251968 | ENSP00000352516 |
| ENSP00000251968 | ENSP00000354522 |
| ENSP00000251968 | ENSP00000354772 |
| ENSP00000251968 | ENSP00000355028 |
| ENSP00000251968 | ENSP00000356104 |
| ENSP00000251968 | ENSP00000358071 |
| ENSP00000251968 | ENSP00000358737 |
| ENSP00000251968 | ENSP00000360475 |
| ENSP00000251968 | ENSP00000360532 |

|                 |                 |
|-----------------|-----------------|
| ENSP00000251968 | ENSP00000360540 |
| ENSP00000251968 | ENSP00000360621 |
| ENSP00000251968 | ENSP00000361845 |
| ENSP00000251968 | ENSP00000361949 |
| ENSP00000251968 | ENSP00000365131 |
| ENSP00000251968 | ENSP00000366565 |
| ENSP00000251968 | ENSP00000366746 |
| ENSP00000251968 | ENSP00000366843 |
| ENSP00000251968 | ENSP00000367299 |
| ENSP00000251968 | ENSP00000370719 |
| ENSP00000251968 | ENSP00000375863 |
| ENSP00000251968 | ENSP00000381031 |
| ENSP00000251968 | ENSP00000381293 |
| ENSP00000251968 | ENSP00000387262 |
| ENSP00000251968 | ENSP00000387347 |
| ENSP00000251968 | ENSP00000396876 |
| ENSP00000251968 | ENSP00000408910 |
| ENSP00000251968 | ENSP00000416892 |
| ENSP00000251968 | ENSP00000417281 |
| ENSP00000251968 | ENSP00000417764 |
| ENSP00000252015 | ENSP00000259808 |
| ENSP00000252015 | ENSP00000297265 |
| ENSP00000252015 | ENSP00000301764 |
| ENSP00000252015 | ENSP00000341268 |
| ENSP00000252015 | ENSP00000352928 |
| ENSP00000252029 | ENSP00000263629 |
| ENSP00000252029 | ENSP00000289371 |
| ENSP00000252029 | ENSP00000345445 |
| ENSP00000252029 | ENSP00000346155 |
| ENSP00000252029 | ENSP00000370737 |
| ENSP00000252034 | ENSP00000253004 |
| ENSP00000252034 | ENSP00000254035 |
| ENSP00000252034 | ENSP00000254301 |
| ENSP00000252034 | ENSP00000261921 |
| ENSP00000252034 | ENSP00000317232 |
| ENSP00000252034 | ENSP00000359652 |
| ENSP00000252034 | ENSP00000361405 |
| ENSP00000252034 | ENSP00000363827 |
| ENSP00000252034 | ENSP00000364685 |
| ENSP00000252034 | ENSP00000384169 |
| ENSP00000252037 | ENSP00000254940 |
| ENSP00000252037 | ENSP00000265963 |
| ENSP00000252037 | ENSP00000267415 |
| ENSP00000252037 | ENSP00000317992 |
| ENSP00000252037 | ENSP00000322396 |
| ENSP00000252037 | ENSP00000338862 |

|                 |                 |
|-----------------|-----------------|
| ENSP00000252037 | ENSP00000351141 |
| ENSP00000252037 | ENSP00000354040 |
| ENSP00000252037 | ENSP00000356785 |
| ENSP00000252037 | ENSP00000359345 |
| ENSP00000252037 | ENSP00000359688 |
| ENSP00000252037 | ENSP00000360310 |
| ENSP00000252037 | ENSP00000360412 |
| ENSP00000252037 | ENSP00000363384 |
| ENSP00000252037 | ENSP00000374529 |
| ENSP00000252037 | ENSP00000377496 |
| ENSP00000252037 | ENSP00000380982 |
| ENSP00000252037 | ENSP00000381657 |
| ENSP00000252037 | ENSP00000402338 |
| ENSP00000252050 | ENSP00000256398 |
| ENSP00000252050 | ENSP00000329466 |
| ENSP00000252050 | ENSP00000348577 |
| ENSP00000252102 | ENSP00000252711 |
| ENSP00000252102 | ENSP00000259037 |
| ENSP00000252102 | ENSP00000263774 |
| ENSP00000252102 | ENSP00000266544 |
| ENSP00000252102 | ENSP00000268668 |
| ENSP00000252102 | ENSP00000274137 |
| ENSP00000252102 | ENSP00000276062 |
| ENSP00000252102 | ENSP00000276689 |
| ENSP00000252102 | ENSP00000281031 |
| ENSP00000252102 | ENSP00000296684 |
| ENSP00000252102 | ENSP00000299166 |
| ENSP00000252102 | ENSP00000301457 |
| ENSP00000252102 | ENSP00000311740 |
| ENSP00000252102 | ENSP00000315774 |
| ENSP00000252102 | ENSP00000322450 |
| ENSP00000252102 | ENSP00000327268 |
| ENSP00000252102 | ENSP00000330737 |
| ENSP00000252102 | ENSP00000346196 |
| ENSP00000252102 | ENSP00000347988 |
| ENSP00000252102 | ENSP00000348965 |
| ENSP00000252102 | ENSP00000354687 |
| ENSP00000252102 | ENSP00000354961 |
| ENSP00000252102 | ENSP00000356972 |
| ENSP00000252102 | ENSP00000362058 |
| ENSP00000252102 | ENSP00000362873 |
| ENSP00000252108 | ENSP00000261942 |
| ENSP00000252108 | ENSP00000263202 |
| ENSP00000252108 | ENSP00000272638 |
| ENSP00000252108 | ENSP00000282388 |
| ENSP00000252108 | ENSP00000283943 |

|                 |                 |
|-----------------|-----------------|
| ENSP00000252108 | ENSP00000296509 |
| ENSP00000252108 | ENSP00000300574 |
| ENSP00000252108 | ENSP00000321617 |
| ENSP00000252108 | ENSP00000326813 |
| ENSP00000252108 | ENSP00000326921 |
| ENSP00000252108 | ENSP00000331201 |
| ENSP00000252108 | ENSP00000331487 |
| ENSP00000252108 | ENSP00000344936 |
| ENSP00000252108 | ENSP00000347498 |
| ENSP00000252108 | ENSP00000347997 |
| ENSP00000252108 | ENSP00000350708 |
| ENSP00000252108 | ENSP00000354883 |
| ENSP00000252108 | ENSP00000363338 |
| ENSP00000252108 | ENSP00000369531 |
| ENSP00000252108 | ENSP00000380460 |
| ENSP00000252108 | ENSP00000382269 |
| ENSP00000252108 | ENSP00000401980 |
| ENSP00000252115 | ENSP00000253107 |
| ENSP00000252115 | ENSP00000254037 |
| ENSP00000252115 | ENSP00000254193 |
| ENSP00000252115 | ENSP00000254442 |
| ENSP00000252115 | ENSP00000254942 |
| ENSP00000252115 | ENSP00000259569 |
| ENSP00000252115 | ENSP00000259750 |
| ENSP00000252115 | ENSP00000261708 |
| ENSP00000252115 | ENSP00000261776 |
| ENSP00000252115 | ENSP00000262077 |
| ENSP00000252115 | ENSP00000262715 |
| ENSP00000252115 | ENSP00000262854 |
| ENSP00000252115 | ENSP00000262903 |
| ENSP00000252115 | ENSP00000263576 |
| ENSP00000252115 | ENSP00000264029 |
| ENSP00000252115 | ENSP00000264108 |
| ENSP00000252115 | ENSP00000264157 |
| ENSP00000252115 | ENSP00000264169 |
| ENSP00000252115 | ENSP00000264951 |
| ENSP00000252115 | ENSP00000265175 |
| ENSP00000252115 | ENSP00000265245 |
| ENSP00000252115 | ENSP00000266079 |
| ENSP00000252115 | ENSP00000268482 |
| ENSP00000252115 | ENSP00000268616 |
| ENSP00000252115 | ENSP00000269499 |
| ENSP00000252115 | ENSP00000282007 |
| ENSP00000252115 | ENSP00000285873 |
| ENSP00000252115 | ENSP00000291688 |
| ENSP00000252115 | ENSP00000296257 |

|                 |                 |
|-----------------|-----------------|
| ENSP00000252115 | ENSP00000296490 |
| ENSP00000252115 | ENSP00000298746 |
| ENSP00000252115 | ENSP00000300648 |
| ENSP00000252115 | ENSP00000301364 |
| ENSP00000252115 | ENSP00000301764 |
| ENSP00000252115 | ENSP00000302768 |
| ENSP00000252115 | ENSP00000303191 |
| ENSP00000252115 | ENSP00000304704 |
| ENSP00000252115 | ENSP00000307863 |
| ENSP00000252115 | ENSP00000308332 |
| ENSP00000252115 | ENSP00000310668 |
| ENSP00000252115 | ENSP00000310723 |
| ENSP00000252115 | ENSP00000311135 |
| ENSP00000252115 | ENSP00000312311 |
| ENSP00000252115 | ENSP00000314348 |
| ENSP00000252115 | ENSP00000314441 |
| ENSP00000252115 | ENSP00000315859 |
| ENSP00000252115 | ENSP00000316879 |
| ENSP00000252115 | ENSP00000317992 |
| ENSP00000252115 | ENSP00000318195 |
| ENSP00000252115 | ENSP00000318374 |
| ENSP00000252115 | ENSP00000318861 |
| ENSP00000252115 | ENSP00000320488 |
| ENSP00000252115 | ENSP00000320917 |
| ENSP00000252115 | ENSP00000322396 |
| ENSP00000252115 | ENSP00000323302 |
| ENSP00000252115 | ENSP00000326806 |
| ENSP00000252115 | ENSP00000327197 |
| ENSP00000252115 | ENSP00000329466 |
| ENSP00000252115 | ENSP00000331907 |
| ENSP00000252115 | ENSP00000332103 |
| ENSP00000252115 | ENSP00000332444 |
| ENSP00000252115 | ENSP00000333401 |
| ENSP00000252115 | ENSP00000337405 |
| ENSP00000252115 | ENSP00000337839 |
| ENSP00000252115 | ENSP00000338862 |
| ENSP00000252115 | ENSP00000339353 |
| ENSP00000252115 | ENSP00000339845 |
| ENSP00000252115 | ENSP00000340281 |
| ENSP00000252115 | ENSP00000342381 |
| ENSP00000252115 | ENSP00000343557 |
| ENSP00000252115 | ENSP00000344055 |
| ENSP00000252115 | ENSP00000346120 |
| ENSP00000252115 | ENSP00000346453 |
| ENSP00000252115 | ENSP00000346725 |
| ENSP00000252115 | ENSP00000347087 |



|                 |                 |
|-----------------|-----------------|
| ENSP00000252115 | ENSP00000348596 |
| ENSP00000252115 | ENSP00000348714 |
| ENSP00000252115 | ENSP00000348877 |
| ENSP00000252115 | ENSP00000350249 |
| ENSP00000252115 | ENSP00000350491 |
| ENSP00000252115 | ENSP00000352400 |
| ENSP00000252115 | ENSP00000352738 |
| ENSP00000252115 | ENSP00000352820 |
| ENSP00000252115 | ENSP00000353059 |
| ENSP00000252115 | ENSP00000353246 |
| ENSP00000252115 | ENSP00000354040 |
| ENSP00000252115 | ENSP00000355541 |
| ENSP00000252115 | ENSP00000356448 |
| ENSP00000252115 | ENSP00000356470 |
| ENSP00000252115 | ENSP00000358563 |
| ENSP00000252115 | ENSP00000358812 |
| ENSP00000252115 | ENSP00000360286 |
| ENSP00000252115 | ENSP00000360412 |
| ENSP00000252115 | ENSP00000360621 |
| ENSP00000252115 | ENSP00000361232 |
| ENSP00000252115 | ENSP00000361245 |
| ENSP00000252115 | ENSP00000361577 |
| ENSP00000252115 | ENSP00000361949 |
| ENSP00000252115 | ENSP00000362171 |
| ENSP00000252115 | ENSP00000362900 |
| ENSP00000252115 | ENSP00000363313 |
| ENSP00000252115 | ENSP00000363338 |
| ENSP00000252115 | ENSP00000364289 |
| ENSP00000252115 | ENSP00000364293 |
| ENSP00000252115 | ENSP00000366135 |
| ENSP00000252115 | ENSP00000366519 |
| ENSP00000252115 | ENSP00000366607 |
| ENSP00000252115 | ENSP00000366953 |
| ENSP00000252115 | ENSP00000368984 |
| ENSP00000252115 | ENSP00000370736 |
| ENSP00000252115 | ENSP00000372445 |
| ENSP00000252115 | ENSP00000374280 |
| ENSP00000252115 | ENSP00000374390 |
| ENSP00000252115 | ENSP00000374529 |
| ENSP00000252115 | ENSP00000380982 |
| ENSP00000252115 | ENSP00000382392 |
| ENSP00000252115 | ENSP00000384302 |
| ENSP00000252115 | ENSP00000386759 |
| ENSP00000252115 | ENSP00000390475 |
| ENSP00000252115 | ENSP00000394791 |
| ENSP00000252115 | ENSP00000396704 |

|                 |                 |
|-----------------|-----------------|
| ENSP00000252115 | ENSP00000402338 |
| ENSP00000252115 | ENSP00000412566 |
| ENSP00000252136 | ENSP00000261868 |
| ENSP00000252136 | ENSP00000270223 |
| ENSP00000252136 | ENSP00000311873 |
| ENSP00000252136 | ENSP00000318977 |
| ENSP00000252136 | ENSP00000329411 |
| ENSP00000252136 | ENSP00000336606 |
| ENSP00000252136 | ENSP00000343190 |
| ENSP00000252136 | ENSP00000347978 |
| ENSP00000252136 | ENSP00000351284 |
| ENSP00000252136 | ENSP00000361642 |
| ENSP00000252137 | ENSP00000259569 |
| ENSP00000252137 | ENSP00000261712 |
| ENSP00000252137 | ENSP00000261973 |
| ENSP00000252137 | ENSP00000262962 |
| ENSP00000252137 | ENSP00000266126 |
| ENSP00000252137 | ENSP00000271452 |
| ENSP00000252137 | ENSP00000281172 |
| ENSP00000252137 | ENSP00000296015 |
| ENSP00000252137 | ENSP00000297954 |
| ENSP00000252137 | ENSP00000299259 |
| ENSP00000252137 | ENSP00000302160 |
| ENSP00000252137 | ENSP00000304370 |
| ENSP00000252137 | ENSP00000309166 |
| ENSP00000252137 | ENSP00000311005 |
| ENSP00000252137 | ENSP00000319169 |
| ENSP00000252137 | ENSP00000328854 |
| ENSP00000252137 | ENSP00000332171 |
| ENSP00000252137 | ENSP00000333920 |
| ENSP00000252137 | ENSP00000334148 |
| ENSP00000252137 | ENSP00000334474 |
| ENSP00000252137 | ENSP00000344683 |
| ENSP00000252137 | ENSP00000344741 |
| ENSP00000252137 | ENSP00000346453 |
| ENSP00000252137 | ENSP00000351137 |
| ENSP00000252137 | ENSP00000356448 |
| ENSP00000252137 | ENSP00000357907 |
| ENSP00000252137 | ENSP00000360286 |
| ENSP00000252137 | ENSP00000360488 |
| ENSP00000252137 | ENSP00000362592 |
| ENSP00000252137 | ENSP00000363349 |
| ENSP00000252137 | ENSP00000374443 |
| ENSP00000252137 | ENSP00000394869 |
| ENSP00000252137 | ENSP00000398597 |
| ENSP00000252137 | ENSP00000413632 |

|                 |                 |
|-----------------|-----------------|
| ENSP00000252244 | ENSP00000257430 |
| ENSP00000252244 | ENSP00000259075 |
| ENSP00000252244 | ENSP00000264474 |
| ENSP00000252244 | ENSP00000265023 |
| ENSP00000252244 | ENSP00000281537 |
| ENSP00000252244 | ENSP00000289081 |
| ENSP00000252244 | ENSP00000295897 |
| ENSP00000252244 | ENSP00000301607 |
| ENSP00000252244 | ENSP00000306124 |
| ENSP00000252244 | ENSP00000357731 |
| ENSP00000252244 | ENSP00000357753 |
| ENSP00000252244 | ENSP00000373952 |
| ENSP00000252329 | ENSP00000253003 |
| ENSP00000252329 | ENSP00000259457 |
| ENSP00000252329 | ENSP00000262193 |
| ENSP00000252329 | ENSP00000290541 |
| ENSP00000252329 | ENSP00000298852 |
| ENSP00000252329 | ENSP00000309474 |
| ENSP00000252329 | ENSP00000310129 |
| ENSP00000252329 | ENSP00000325919 |
| ENSP00000252329 | ENSP00000329915 |
| ENSP00000252329 | ENSP00000335808 |
| ENSP00000252329 | ENSP00000362334 |
| ENSP00000252329 | ENSP00000370222 |
| ENSP00000252445 | ENSP00000263208 |
| ENSP00000252445 | ENSP00000263390 |
| ENSP00000252445 | ENSP00000263736 |
| ENSP00000252445 | ENSP00000263857 |
| ENSP00000252445 | ENSP00000272645 |
| ENSP00000252445 | ENSP00000295066 |
| ENSP00000252445 | ENSP00000295321 |
| ENSP00000252445 | ENSP00000296328 |
| ENSP00000252445 | ENSP00000299601 |
| ENSP00000252445 | ENSP00000314949 |
| ENSP00000252445 | ENSP00000317468 |
| ENSP00000252445 | ENSP00000319104 |
| ENSP00000252445 | ENSP00000321617 |
| ENSP00000252445 | ENSP00000326879 |
| ENSP00000252445 | ENSP00000336842 |
| ENSP00000252445 | ENSP00000343190 |
| ENSP00000252445 | ENSP00000356405 |
| ENSP00000252445 | ENSP00000361465 |
| ENSP00000252445 | ENSP00000361642 |
| ENSP00000252445 | ENSP00000363559 |
| ENSP00000252445 | ENSP00000365025 |
| ENSP00000252445 | ENSP00000374280 |

|                 |                 |
|-----------------|-----------------|
| ENSP00000252445 | ENSP00000386621 |
| ENSP00000252445 | ENSP00000389813 |
| ENSP00000252445 | ENSP00000406293 |
| ENSP00000252453 | ENSP00000321239 |
| ENSP00000252483 | ENSP00000274030 |
| ENSP00000252483 | ENSP00000280200 |
| ENSP00000252483 | ENSP00000349465 |
| ENSP00000252483 | ENSP00000356991 |
| ENSP00000252483 | ENSP00000373167 |
| ENSP00000252483 | ENSP00000383623 |
| ENSP00000252483 | ENSP00000418070 |
| ENSP00000252486 | ENSP00000261693 |
| ENSP00000252486 | ENSP00000263816 |
| ENSP00000252486 | ENSP00000280154 |
| ENSP00000252486 | ENSP00000284981 |
| ENSP00000252486 | ENSP00000286627 |
| ENSP00000252486 | ENSP00000295897 |
| ENSP00000252486 | ENSP00000314615 |
| ENSP00000252486 | ENSP00000326366 |
| ENSP00000252486 | ENSP00000340820 |
| ENSP00000252486 | ENSP00000350718 |
| ENSP00000252486 | ENSP00000353508 |
| ENSP00000252486 | ENSP00000355370 |
| ENSP00000252486 | ENSP00000361508 |
| ENSP00000252487 | ENSP00000269143 |
| ENSP00000252487 | ENSP00000284320 |
| ENSP00000252487 | ENSP00000293288 |
| ENSP00000252487 | ENSP00000295767 |
| ENSP00000252487 | ENSP00000305958 |
| ENSP00000252487 | ENSP00000311766 |
| ENSP00000252487 | ENSP00000318115 |
| ENSP00000252487 | ENSP00000320236 |
| ENSP00000252487 | ENSP00000345445 |
| ENSP00000252487 | ENSP00000351214 |
| ENSP00000252487 | ENSP00000352219 |
| ENSP00000252487 | ENSP00000354204 |
| ENSP00000252487 | ENSP00000355167 |
| ENSP00000252487 | ENSP00000356785 |
| ENSP00000252487 | ENSP00000357360 |
| ENSP00000252487 | ENSP00000358042 |
| ENSP00000252487 | ENSP00000361686 |
| ENSP00000252487 | ENSP00000365766 |
| ENSP00000252487 | ENSP00000387262 |
| ENSP00000252487 | ENSP00000388872 |
| ENSP00000252487 | ENSP00000407401 |
| ENSP00000252543 | ENSP00000253099 |

|                 |                 |
|-----------------|-----------------|
| ENSP00000252543 | ENSP00000253788 |
| ENSP00000252543 | ENSP00000254037 |
| ENSP00000252543 | ENSP00000257829 |
| ENSP00000252543 | ENSP00000258455 |
| ENSP00000252543 | ENSP00000259469 |
| ENSP00000252543 | ENSP00000260102 |
| ENSP00000252543 | ENSP00000260443 |
| ENSP00000252543 | ENSP00000261531 |
| ENSP00000252543 | ENSP00000262584 |
| ENSP00000252543 | ENSP00000264995 |
| ENSP00000252543 | ENSP00000265100 |
| ENSP00000252543 | ENSP00000265245 |
| ENSP00000252543 | ENSP00000268616 |
| ENSP00000252543 | ENSP00000268661 |
| ENSP00000252543 | ENSP00000269499 |
| ENSP00000252543 | ENSP00000270625 |
| ENSP00000252543 | ENSP00000274242 |
| ENSP00000252543 | ENSP00000274606 |
| ENSP00000252543 | ENSP00000278572 |
| ENSP00000252543 | ENSP00000287038 |
| ENSP00000252543 | ENSP00000289371 |
| ENSP00000252543 | ENSP00000294189 |
| ENSP00000252543 | ENSP00000296411 |
| ENSP00000252543 | ENSP00000296674 |
| ENSP00000252543 | ENSP00000296802 |
| ENSP00000252543 | ENSP00000298283 |
| ENSP00000252543 | ENSP00000300151 |
| ENSP00000252543 | ENSP00000302886 |
| ENSP00000252543 | ENSP00000302896 |
| ENSP00000252543 | ENSP00000306548 |
| ENSP00000252543 | ENSP00000307889 |
| ENSP00000252543 | ENSP00000308897 |
| ENSP00000252543 | ENSP00000309334 |
| ENSP00000252543 | ENSP00000309830 |
| ENSP00000252543 | ENSP00000311028 |
| ENSP00000252543 | ENSP00000311430 |
| ENSP00000252543 | ENSP00000317376 |
| ENSP00000252543 | ENSP00000318646 |
| ENSP00000252543 | ENSP00000322419 |
| ENSP00000252543 | ENSP00000325312 |
| ENSP00000252543 | ENSP00000326981 |
| ENSP00000252543 | ENSP00000328690 |
| ENSP00000252543 | ENSP00000334813 |
| ENSP00000252543 | ENSP00000337839 |
| ENSP00000252543 | ENSP00000338573 |
| ENSP00000252543 | ENSP00000339095 |

|                 |                 |
|-----------------|-----------------|
| ENSP00000252543 | ENSP00000339795 |
| ENSP00000252543 | ENSP00000344683 |
| ENSP00000252543 | ENSP00000345156 |
| ENSP00000252543 | ENSP00000346015 |
| ENSP00000252543 | ENSP00000346022 |
| ENSP00000252543 | ENSP00000346027 |
| ENSP00000252543 | ENSP00000346037 |
| ENSP00000252543 | ENSP00000346050 |
| ENSP00000252543 | ENSP00000346088 |
| ENSP00000252543 | ENSP00000346725 |
| ENSP00000252543 | ENSP00000347087 |
| ENSP00000252543 | ENSP00000348965 |
| ENSP00000252543 | ENSP00000352514 |
| ENSP00000252543 | ENSP00000353741 |
| ENSP00000252543 | ENSP00000354040 |
| ENSP00000252543 | ENSP00000354525 |
| ENSP00000252543 | ENSP00000354739 |
| ENSP00000252543 | ENSP00000359345 |
| ENSP00000252543 | ENSP00000361076 |
| ENSP00000252543 | ENSP00000362153 |
| ENSP00000252543 | ENSP00000362744 |
| ENSP00000252543 | ENSP00000363018 |
| ENSP00000252543 | ENSP00000363384 |
| ENSP00000252543 | ENSP00000363559 |
| ENSP00000252543 | ENSP00000363676 |
| ENSP00000252543 | ENSP00000364320 |
| ENSP00000252543 | ENSP00000369757 |
| ENSP00000252543 | ENSP00000371101 |
| ENSP00000252543 | ENSP00000373404 |
| ENSP00000252543 | ENSP00000375730 |
| ENSP00000252543 | ENSP00000377640 |
| ENSP00000252543 | ENSP00000377865 |
| ENSP00000252543 | ENSP00000378160 |
| ENSP00000252543 | ENSP00000379607 |
| ENSP00000252543 | ENSP00000379888 |
| ENSP00000252543 | ENSP00000380156 |
| ENSP00000252543 | ENSP00000386717 |
| ENSP00000252543 | ENSP00000389103 |
| ENSP00000252543 | ENSP00000391723 |
| ENSP00000252543 | ENSP00000393241 |
| ENSP00000252543 | ENSP00000393393 |
| ENSP00000252543 | ENSP00000402338 |
| ENSP00000252543 | ENSP00000403175 |
| ENSP00000252543 | ENSP00000412583 |
| ENSP00000252543 | ENSP00000414321 |
| ENSP00000252543 | ENSP00000416110 |

|                 |                 |
|-----------------|-----------------|
| ENSP00000252575 | ENSP00000341170 |
| ENSP00000252593 | ENSP00000379383 |
| ENSP00000252597 | ENSP00000260383 |
| ENSP00000252597 | ENSP00000261597 |
| ENSP00000252597 | ENSP00000262419 |
| ENSP00000252597 | ENSP00000264389 |
| ENSP00000252597 | ENSP00000265963 |
| ENSP00000252597 | ENSP00000298295 |
| ENSP00000252597 | ENSP00000302935 |
| ENSP00000252597 | ENSP00000318821 |
| ENSP00000252597 | ENSP00000324292 |
| ENSP00000252597 | ENSP00000325414 |
| ENSP00000252597 | ENSP00000326514 |
| ENSP00000252597 | ENSP00000328854 |
| ENSP00000252597 | ENSP00000331201 |
| ENSP00000252597 | ENSP00000334100 |
| ENSP00000252597 | ENSP00000336524 |
| ENSP00000252597 | ENSP00000353564 |
| ENSP00000252597 | ENSP00000354270 |
| ENSP00000252597 | ENSP00000355944 |
| ENSP00000252597 | ENSP00000359375 |
| ENSP00000252597 | ENSP00000361276 |
| ENSP00000252597 | ENSP00000367910 |
| ENSP00000252597 | ENSP00000370671 |
| ENSP00000252597 | ENSP00000374529 |
| ENSP00000252597 | ENSP00000377793 |
| ENSP00000252597 | ENSP00000381795 |
| ENSP00000252602 | ENSP00000262584 |
| ENSP00000252602 | ENSP00000264995 |
| ENSP00000252602 | ENSP00000265100 |
| ENSP00000252602 | ENSP00000288937 |
| ENSP00000252602 | ENSP00000306548 |
| ENSP00000252602 | ENSP00000308897 |
| ENSP00000252602 | ENSP00000333837 |
| ENSP00000252602 | ENSP00000354525 |
| ENSP00000252602 | ENSP00000354739 |
| ENSP00000252602 | ENSP00000373404 |
| ENSP00000252602 | ENSP00000375730 |
| ENSP00000252602 | ENSP00000377486 |
| ENSP00000252622 | ENSP00000253107 |
| ENSP00000252622 | ENSP00000254193 |
| ENSP00000252622 | ENSP00000258400 |
| ENSP00000252622 | ENSP00000258416 |
| ENSP00000252622 | ENSP00000260210 |
| ENSP00000252622 | ENSP00000260956 |
| ENSP00000252622 | ENSP00000261951 |

|                 |                 |
|-----------------|-----------------|
| ENSP00000252622 | ENSP00000262518 |
| ENSP00000252622 | ENSP00000262982 |
| ENSP00000252622 | ENSP00000263576 |
| ENSP00000252622 | ENSP00000264233 |
| ENSP00000252622 | ENSP00000264951 |
| ENSP00000252622 | ENSP00000265304 |
| ENSP00000252622 | ENSP00000266079 |
| ENSP00000252622 | ENSP00000266735 |
| ENSP00000252622 | ENSP00000268206 |
| ENSP00000252622 | ENSP00000268483 |
| ENSP00000252622 | ENSP00000272227 |
| ENSP00000252622 | ENSP00000274712 |
| ENSP00000252622 | ENSP00000280665 |
| ENSP00000252622 | ENSP00000292535 |
| ENSP00000252622 | ENSP00000295488 |
| ENSP00000252622 | ENSP00000296215 |
| ENSP00000252622 | ENSP00000296805 |
| ENSP00000252622 | ENSP00000300146 |
| ENSP00000252622 | ENSP00000300413 |
| ENSP00000252622 | ENSP00000300441 |
| ENSP00000252622 | ENSP00000300648 |
| ENSP00000252622 | ENSP00000301740 |
| ENSP00000252622 | ENSP00000302160 |
| ENSP00000252622 | ENSP00000303515 |
| ENSP00000252622 | ENSP00000304350 |
| ENSP00000252622 | ENSP00000304903 |
| ENSP00000252622 | ENSP00000308546 |
| ENSP00000252622 | ENSP00000310448 |
| ENSP00000252622 | ENSP00000310596 |
| ENSP00000252622 | ENSP00000310723 |
| ENSP00000252622 | ENSP00000314311 |
| ENSP00000252622 | ENSP00000315035 |
| ENSP00000252622 | ENSP00000315379 |
| ENSP00000252622 | ENSP00000319341 |
| ENSP00000252622 | ENSP00000320503 |
| ENSP00000252622 | ENSP00000320566 |
| ENSP00000252622 | ENSP00000323046 |
| ENSP00000252622 | ENSP00000324122 |
| ENSP00000252622 | ENSP00000324573 |
| ENSP00000252622 | ENSP00000331310 |
| ENSP00000252622 | ENSP00000332103 |
| ENSP00000252622 | ENSP00000339090 |
| ENSP00000252622 | ENSP00000339503 |
| ENSP00000252622 | ENSP00000342374 |
| ENSP00000252622 | ENSP00000348107 |
| ENSP00000252622 | ENSP00000349465 |



|                 |                 |
|-----------------|-----------------|
| ENSP00000252622 | ENSP00000350512 |
| ENSP00000252622 | ENSP00000354522 |
| ENSP00000252622 | ENSP00000357887 |
| ENSP00000252622 | ENSP00000358716 |
| ENSP00000252622 | ENSP00000359454 |
| ENSP00000252622 | ENSP00000359939 |
| ENSP00000252622 | ENSP00000361433 |
| ENSP00000252622 | ENSP00000361577 |
| ENSP00000252622 | ENSP00000362110 |
| ENSP00000252622 | ENSP00000362413 |
| ENSP00000252622 | ENSP00000363313 |
| ENSP00000252622 | ENSP00000363734 |
| ENSP00000252622 | ENSP00000364813 |
| ENSP00000252622 | ENSP00000365837 |
| ENSP00000252622 | ENSP00000366135 |
| ENSP00000252622 | ENSP00000366557 |
| ENSP00000252622 | ENSP00000367835 |
| ENSP00000252622 | ENSP00000370083 |
| ENSP00000252622 | ENSP00000370119 |
| ENSP00000252622 | ENSP00000370589 |
| ENSP00000252622 | ENSP00000372694 |
| ENSP00000252622 | ENSP00000373715 |
| ENSP00000252622 | ENSP00000374213 |
| ENSP00000252622 | ENSP00000376973 |
| ENSP00000252622 | ENSP00000378529 |
| ENSP00000252622 | ENSP00000391723 |
| ENSP00000252622 | ENSP00000392466 |
| ENSP00000252622 | ENSP00000398597 |
| ENSP00000252622 | ENSP00000400591 |
| ENSP00000252622 | ENSP00000402240 |
| ENSP00000252622 | ENSP00000410758 |
| ENSP00000252622 | ENSP00000412319 |
| ENSP00000252622 | ENSP00000412566 |
| ENSP00000252622 | ENSP00000414006 |
| ENSP00000252622 | ENSP00000414634 |
| ENSP00000252622 | ENSP00000415678 |
| ENSP00000252699 | ENSP00000254035 |
| ENSP00000252699 | ENSP00000258682 |
| ENSP00000252699 | ENSP00000261207 |
| ENSP00000252699 | ENSP00000263666 |
| ENSP00000252699 | ENSP00000265517 |
| ENSP00000252699 | ENSP00000265810 |
| ENSP00000252699 | ENSP00000268182 |
| ENSP00000252699 | ENSP00000268668 |
| ENSP00000252699 | ENSP00000269122 |
| ENSP00000252699 | ENSP00000277575 |

|                 |                 |
|-----------------|-----------------|
| ENSP00000252699 | ENSP00000277865 |
| ENSP00000252699 | ENSP00000281537 |
| ENSP00000252699 | ENSP00000284770 |
| ENSP00000252699 | ENSP00000286091 |
| ENSP00000252699 | ENSP00000297508 |
| ENSP00000252699 | ENSP00000302640 |
| ENSP00000252699 | ENSP00000302913 |
| ENSP00000252699 | ENSP00000309629 |
| ENSP00000252699 | ENSP00000311005 |
| ENSP00000252699 | ENSP00000317159 |
| ENSP00000252699 | ENSP00000320885 |
| ENSP00000252699 | ENSP00000322170 |
| ENSP00000252699 | ENSP00000329466 |
| ENSP00000252699 | ENSP00000336927 |
| ENSP00000252699 | ENSP00000339795 |
| ENSP00000252699 | ENSP00000340937 |
| ENSP00000252699 | ENSP00000340944 |
| ENSP00000252699 | ENSP00000341838 |
| ENSP00000252699 | ENSP00000344456 |
| ENSP00000252699 | ENSP00000348128 |
| ENSP00000252699 | ENSP00000348163 |
| ENSP00000252699 | ENSP00000350249 |
| ENSP00000252699 | ENSP00000352272 |
| ENSP00000252699 | ENSP00000355153 |
| ENSP00000252699 | ENSP00000355205 |
| ENSP00000252699 | ENSP00000359345 |
| ENSP00000252699 | ENSP00000360112 |
| ENSP00000252699 | ENSP00000362424 |
| ENSP00000252699 | ENSP00000365891 |
| ENSP00000252699 | ENSP00000370083 |
| ENSP00000252699 | ENSP00000370119 |
| ENSP00000252699 | ENSP00000371729 |
| ENSP00000252699 | ENSP00000374455 |
| ENSP00000252699 | ENSP00000379607 |
| ENSP00000252699 | ENSP00000382064 |
| ENSP00000252699 | ENSP00000384792 |
| ENSP00000252699 | ENSP00000386259 |
| ENSP00000252699 | ENSP00000386520 |
| ENSP00000252699 | ENSP00000394794 |
| ENSP00000252711 | ENSP00000262878 |
| ENSP00000252711 | ENSP00000270625 |
| ENSP00000252711 | ENSP00000288828 |
| ENSP00000252711 | ENSP00000322706 |
| ENSP00000252723 | ENSP00000317636 |
| ENSP00000252725 | ENSP00000295685 |
| ENSP00000252725 | ENSP00000298910 |

|                 |                 |
|-----------------|-----------------|
| ENSP00000252725 | ENSP00000320924 |
| ENSP00000252725 | ENSP00000322170 |
| ENSP00000252725 | ENSP00000326238 |
| ENSP00000252725 | ENSP00000338727 |
| ENSP00000252725 | ENSP00000348163 |
| ENSP00000252725 | ENSP00000348784 |
| ENSP00000252725 | ENSP00000350757 |
| ENSP00000252725 | ENSP00000352802 |
| ENSP00000252725 | ENSP00000360798 |
| ENSP00000252725 | ENSP00000365147 |
| ENSP00000252725 | ENSP00000365891 |
| ENSP00000252725 | ENSP00000375857 |
| ENSP00000252725 | ENSP00000380431 |
| ENSP00000252725 | ENSP00000386878 |
| ENSP00000252771 | ENSP00000260008 |
| ENSP00000252771 | ENSP00000268182 |
| ENSP00000252771 | ENSP00000270861 |
| ENSP00000252771 | ENSP00000274289 |
| ENSP00000252771 | ENSP00000280190 |
| ENSP00000252771 | ENSP00000281282 |
| ENSP00000252771 | ENSP00000318884 |
| ENSP00000252771 | ENSP00000326699 |
| ENSP00000252771 | ENSP00000333950 |
| ENSP00000252771 | ENSP00000338157 |
| ENSP00000252771 | ENSP00000376410 |
| ENSP00000252771 | ENSP00000391249 |
| ENSP00000252771 | ENSP00000397351 |
| ENSP00000252771 | ENSP00000397598 |
| ENSP00000252771 | ENSP00000407879 |
| ENSP00000252799 | ENSP00000358918 |
| ENSP00000252804 | ENSP00000265970 |
| ENSP00000252809 | ENSP00000296137 |
| ENSP00000252809 | ENSP00000305459 |
| ENSP00000252825 | ENSP00000379607 |
| ENSP00000252934 | ENSP00000256216 |
| ENSP00000252934 | ENSP00000261712 |
| ENSP00000252934 | ENSP00000290429 |
| ENSP00000252934 | ENSP00000296577 |
| ENSP00000252934 | ENSP00000299259 |
| ENSP00000252934 | ENSP00000311505 |
| ENSP00000252934 | ENSP00000341213 |
| ENSP00000252934 | ENSP00000350512 |
| ENSP00000252934 | ENSP00000362824 |
| ENSP00000252934 | ENSP00000364847 |
| ENSP00000252934 | ENSP00000369257 |
| ENSP00000252936 | ENSP00000252999 |

|                 |                 |
|-----------------|-----------------|
| ENSP00000252936 | ENSP00000260731 |
| ENSP00000252936 | ENSP00000261531 |
| ENSP00000252936 | ENSP00000261965 |
| ENSP00000252936 | ENSP00000263791 |
| ENSP00000252936 | ENSP00000270861 |
| ENSP00000252936 | ENSP00000274289 |
| ENSP00000252936 | ENSP00000280527 |
| ENSP00000252936 | ENSP00000288976 |
| ENSP00000252936 | ENSP00000296509 |
| ENSP00000252936 | ENSP00000300584 |
| ENSP00000252936 | ENSP00000304668 |
| ENSP00000252936 | ENSP00000305941 |
| ENSP00000252936 | ENSP00000325562 |
| ENSP00000252936 | ENSP00000331831 |
| ENSP00000252936 | ENSP00000335357 |
| ENSP00000252936 | ENSP00000346566 |
| ENSP00000252936 | ENSP00000348573 |
| ENSP00000252936 | ENSP00000352572 |
| ENSP00000252936 | ENSP00000354916 |
| ENSP00000252936 | ENSP00000356448 |
| ENSP00000252936 | ENSP00000359206 |
| ENSP00000252936 | ENSP00000360532 |
| ENSP00000252936 | ENSP00000363018 |
| ENSP00000252936 | ENSP00000363734 |
| ENSP00000252936 | ENSP00000367049 |
| ENSP00000252936 | ENSP00000368976 |
| ENSP00000252936 | ENSP00000370517 |
| ENSP00000252936 | ENSP00000372694 |
| ENSP00000252936 | ENSP00000380921 |
| ENSP00000252936 | ENSP00000383145 |
| ENSP00000252936 | ENSP00000402038 |
| ENSP00000252936 | ENSP00000402240 |
| ENSP00000252936 | ENSP00000412319 |
| ENSP00000252936 | ENSP00000413625 |
| ENSP00000252936 | ENSP00000415678 |
| ENSP00000252996 | ENSP00000259235 |
| ENSP00000252996 | ENSP00000261951 |
| ENSP00000252996 | ENSP00000263208 |
| ENSP00000252996 | ENSP00000263390 |
| ENSP00000252996 | ENSP00000263974 |
| ENSP00000252996 | ENSP00000264193 |
| ENSP00000252996 | ENSP00000265372 |
| ENSP00000252996 | ENSP00000267064 |
| ENSP00000252996 | ENSP00000276072 |
| ENSP00000252996 | ENSP00000282388 |
| ENSP00000252996 | ENSP00000298937 |

|                 |                 |
|-----------------|-----------------|
| ENSP00000252996 | ENSP00000299424 |
| ENSP00000252996 | ENSP00000302327 |
| ENSP00000252996 | ENSP00000306983 |
| ENSP00000252996 | ENSP00000307208 |
| ENSP00000252996 | ENSP00000320949 |
| ENSP00000252996 | ENSP00000329357 |
| ENSP00000252996 | ENSP00000331057 |
| ENSP00000252996 | ENSP00000340271 |
| ENSP00000252996 | ENSP00000341805 |
| ENSP00000252996 | ENSP00000344537 |
| ENSP00000252996 | ENSP00000347184 |
| ENSP00000252996 | ENSP00000347733 |
| ENSP00000252996 | ENSP00000349213 |
| ENSP00000252996 | ENSP00000353622 |
| ENSP00000252996 | ENSP00000354633 |
| ENSP00000252996 | ENSP00000355051 |
| ENSP00000252996 | ENSP00000357442 |
| ENSP00000252996 | ENSP00000357494 |
| ENSP00000252996 | ENSP00000358854 |
| ENSP00000252996 | ENSP00000359958 |
| ENSP00000252996 | ENSP00000360515 |
| ENSP00000252996 | ENSP00000362068 |
| ENSP00000252996 | ENSP00000364430 |
| ENSP00000252996 | ENSP00000367406 |
| ENSP00000252996 | ENSP00000369695 |
| ENSP00000252996 | ENSP00000379372 |
| ENSP00000252996 | ENSP00000381031 |
| ENSP00000252996 | ENSP00000418734 |
| ENSP00000252999 | ENSP00000261965 |
| ENSP00000252999 | ENSP00000263816 |
| ENSP00000252999 | ENSP00000271452 |
| ENSP00000252999 | ENSP00000278174 |
| ENSP00000252999 | ENSP00000302021 |
| ENSP00000252999 | ENSP00000312435 |
| ENSP00000252999 | ENSP00000346566 |
| ENSP00000252999 | ENSP00000356448 |
| ENSP00000252999 | ENSP00000357547 |
| ENSP00000252999 | ENSP00000358142 |
| ENSP00000252999 | ENSP00000382562 |
| ENSP00000252999 | ENSP00000384169 |
| ENSP00000253003 | ENSP00000259457 |
| ENSP00000253003 | ENSP00000261601 |
| ENSP00000253003 | ENSP00000261712 |
| ENSP00000253003 | ENSP00000262193 |
| ENSP00000253003 | ENSP00000262394 |
| ENSP00000253003 | ENSP00000263205 |

|                 |                 |
|-----------------|-----------------|
| ENSP00000253003 | ENSP00000264335 |
| ENSP00000253003 | ENSP00000264639 |
| ENSP00000253003 | ENSP00000290541 |
| ENSP00000253003 | ENSP00000293879 |
| ENSP00000253003 | ENSP00000295901 |
| ENSP00000253003 | ENSP00000296255 |
| ENSP00000253003 | ENSP00000296792 |
| ENSP00000253003 | ENSP00000298852 |
| ENSP00000253003 | ENSP00000299206 |
| ENSP00000253003 | ENSP00000299259 |
| ENSP00000253003 | ENSP00000309474 |
| ENSP00000253003 | ENSP00000310129 |
| ENSP00000253003 | ENSP00000311245 |
| ENSP00000253003 | ENSP00000311665 |
| ENSP00000253003 | ENSP00000318313 |
| ENSP00000253003 | ENSP00000325448 |
| ENSP00000253003 | ENSP00000325919 |
| ENSP00000253003 | ENSP00000339449 |
| ENSP00000253003 | ENSP00000348129 |
| ENSP00000253003 | ENSP00000348442 |
| ENSP00000253003 | ENSP00000350708 |
| ENSP00000253003 | ENSP00000356641 |
| ENSP00000253003 | ENSP00000356774 |
| ENSP00000253003 | ENSP00000360216 |
| ENSP00000253003 | ENSP00000361993 |
| ENSP00000253003 | ENSP00000362334 |
| ENSP00000253003 | ENSP00000384211 |
| ENSP00000253003 | ENSP00000386212 |
| ENSP00000253003 | ENSP00000396937 |
| ENSP00000253003 | ENSP00000400476 |
| ENSP00000253004 | ENSP00000254942 |
| ENSP00000253004 | ENSP00000276603 |
| ENSP00000253004 | ENSP00000288602 |
| ENSP00000253004 | ENSP00000300245 |
| ENSP00000253004 | ENSP00000328690 |
| ENSP00000253004 | ENSP00000333667 |
| ENSP00000253004 | ENSP00000363676 |
| ENSP00000253004 | ENSP00000372199 |
| ENSP00000253004 | ENSP00000379933 |
| ENSP00000253004 | ENSP00000381654 |
| ENSP00000253031 | ENSP00000259400 |
| ENSP00000253031 | ENSP00000268129 |
| ENSP00000253031 | ENSP00000289119 |
| ENSP00000253031 | ENSP00000302657 |
| ENSP00000253031 | ENSP00000311134 |
| ENSP00000253031 | ENSP00000314615 |

|                 |                 |
|-----------------|-----------------|
| ENSP00000253047 | ENSP00000368797 |
| ENSP00000253047 | ENSP00000374455 |
| ENSP00000253048 | ENSP00000280362 |
| ENSP00000253048 | ENSP00000291386 |
| ENSP00000253048 | ENSP00000296490 |
| ENSP00000253048 | ENSP00000300291 |
| ENSP00000253048 | ENSP00000304704 |
| ENSP00000253048 | ENSP00000315791 |
| ENSP00000253048 | ENSP00000317872 |
| ENSP00000253048 | ENSP00000325377 |
| ENSP00000253048 | ENSP00000339353 |
| ENSP00000253083 | ENSP00000253699 |
| ENSP00000253083 | ENSP00000256854 |
| ENSP00000253083 | ENSP00000260008 |
| ENSP00000253083 | ENSP00000261531 |
| ENSP00000253083 | ENSP00000262039 |
| ENSP00000253083 | ENSP00000263228 |
| ENSP00000253083 | ENSP00000263277 |
| ENSP00000253083 | ENSP00000264161 |
| ENSP00000253083 | ENSP00000269122 |
| ENSP00000253083 | ENSP00000272322 |
| ENSP00000253083 | ENSP00000276416 |
| ENSP00000253083 | ENSP00000281187 |
| ENSP00000253083 | ENSP00000299138 |
| ENSP00000253083 | ENSP00000301843 |
| ENSP00000253083 | ENSP00000303434 |
| ENSP00000253083 | ENSP00000314499 |
| ENSP00000253083 | ENSP00000314615 |
| ENSP00000253083 | ENSP00000318884 |
| ENSP00000253083 | ENSP00000320543 |
| ENSP00000253083 | ENSP00000320924 |
| ENSP00000253083 | ENSP00000326534 |
| ENSP00000253083 | ENSP00000327650 |
| ENSP00000253083 | ENSP00000333657 |
| ENSP00000253083 | ENSP00000333950 |
| ENSP00000253083 | ENSP00000334836 |
| ENSP00000253083 | ENSP00000343526 |
| ENSP00000253083 | ENSP00000345530 |
| ENSP00000253083 | ENSP00000347184 |
| ENSP00000253083 | ENSP00000348163 |
| ENSP00000253083 | ENSP00000348602 |
| ENSP00000253083 | ENSP00000349205 |
| ENSP00000253083 | ENSP00000352802 |
| ENSP00000253083 | ENSP00000354522 |
| ENSP00000253083 | ENSP00000354558 |
| ENSP00000253083 | ENSP00000354681 |

|                 |                 |
|-----------------|-----------------|
| ENSP00000253083 | ENSP00000354916 |
| ENSP00000253083 | ENSP00000355471 |
| ENSP00000253083 | ENSP00000356134 |
| ENSP00000253083 | ENSP00000356811 |
| ENSP00000253083 | ENSP00000358140 |
| ENSP00000253083 | ENSP00000360183 |
| ENSP00000253083 | ENSP00000360532 |
| ENSP00000253083 | ENSP00000360798 |
| ENSP00000253083 | ENSP00000362399 |
| ENSP00000253083 | ENSP00000365891 |
| ENSP00000253083 | ENSP00000366746 |
| ENSP00000253083 | ENSP00000369810 |
| ENSP00000253083 | ENSP00000372697 |
| ENSP00000253083 | ENSP00000376410 |
| ENSP00000253083 | ENSP00000378529 |
| ENSP00000253083 | ENSP00000379228 |
| ENSP00000253083 | ENSP00000380921 |
| ENSP00000253083 | ENSP00000386456 |
| ENSP00000253083 | ENSP00000386878 |
| ENSP00000253083 | ENSP00000390831 |
| ENSP00000253083 | ENSP00000391197 |
| ENSP00000253083 | ENSP00000397351 |
| ENSP00000253083 | ENSP00000401435 |
| ENSP00000253083 | ENSP00000404016 |
| ENSP00000253083 | ENSP00000406988 |
| ENSP00000253083 | ENSP00000407487 |
| ENSP00000253083 | ENSP00000409952 |
| ENSP00000253099 | ENSP00000253788 |
| ENSP00000253099 | ENSP00000256404 |
| ENSP00000253099 | ENSP00000257829 |
| ENSP00000253099 | ENSP00000258383 |
| ENSP00000253099 | ENSP00000258455 |
| ENSP00000253099 | ENSP00000259469 |
| ENSP00000253099 | ENSP00000260102 |
| ENSP00000253099 | ENSP00000260443 |
| ENSP00000253099 | ENSP00000262077 |
| ENSP00000253099 | ENSP00000263629 |
| ENSP00000253099 | ENSP00000263657 |
| ENSP00000253099 | ENSP00000264335 |
| ENSP00000253099 | ENSP00000264995 |
| ENSP00000253099 | ENSP00000268206 |
| ENSP00000253099 | ENSP00000268661 |
| ENSP00000253099 | ENSP00000270538 |
| ENSP00000253099 | ENSP00000270625 |
| ENSP00000253099 | ENSP00000274242 |
| ENSP00000253099 | ENSP00000274606 |



|                 |                 |
|-----------------|-----------------|
| ENSP00000253099 | ENSP00000278572 |
| ENSP00000253099 | ENSP00000279242 |
| ENSP00000253099 | ENSP00000287038 |
| ENSP00000253099 | ENSP00000288937 |
| ENSP00000253099 | ENSP00000289371 |
| ENSP00000253099 | ENSP00000294189 |
| ENSP00000253099 | ENSP00000296102 |
| ENSP00000253099 | ENSP00000296577 |
| ENSP00000253099 | ENSP00000296802 |
| ENSP00000253099 | ENSP00000296805 |
| ENSP00000253099 | ENSP00000297908 |
| ENSP00000253099 | ENSP00000300151 |
| ENSP00000253099 | ENSP00000301585 |
| ENSP00000253099 | ENSP00000302160 |
| ENSP00000253099 | ENSP00000302896 |
| ENSP00000253099 | ENSP00000305503 |
| ENSP00000253099 | ENSP00000306548 |
| ENSP00000253099 | ENSP00000307889 |
| ENSP00000253099 | ENSP00000308275 |
| ENSP00000253099 | ENSP00000308897 |
| ENSP00000253099 | ENSP00000309334 |
| ENSP00000253099 | ENSP00000309830 |
| ENSP00000253099 | ENSP00000310668 |
| ENSP00000253099 | ENSP00000310723 |
| ENSP00000253099 | ENSP00000311028 |
| ENSP00000253099 | ENSP00000312311 |
| ENSP00000253099 | ENSP00000315017 |
| ENSP00000253099 | ENSP00000317376 |
| ENSP00000253099 | ENSP00000318646 |
| ENSP00000253099 | ENSP00000322419 |
| ENSP00000253099 | ENSP00000324122 |
| ENSP00000253099 | ENSP00000326981 |
| ENSP00000253099 | ENSP00000328690 |
| ENSP00000253099 | ENSP00000328854 |
| ENSP00000253099 | ENSP00000333401 |
| ENSP00000253099 | ENSP00000333837 |
| ENSP00000253099 | ENSP00000336702 |
| ENSP00000253099 | ENSP00000338862 |
| ENSP00000253099 | ENSP00000339095 |
| ENSP00000253099 | ENSP00000339795 |
| ENSP00000253099 | ENSP00000339845 |
| ENSP00000253099 | ENSP00000341082 |
| ENSP00000253099 | ENSP00000343392 |
| ENSP00000253099 | ENSP00000343745 |
| ENSP00000253099 | ENSP00000345156 |
| ENSP00000253099 | ENSP00000346015 |

|                 |                 |
|-----------------|-----------------|
| ENSP00000253099 | ENSP00000346022 |
| ENSP00000253099 | ENSP00000346027 |
| ENSP00000253099 | ENSP00000346037 |
| ENSP00000253099 | ENSP00000346050 |
| ENSP00000253099 | ENSP00000346088 |
| ENSP00000253099 | ENSP00000346725 |
| ENSP00000253099 | ENSP00000348886 |
| ENSP00000253099 | ENSP00000354040 |
| ENSP00000253099 | ENSP00000354125 |
| ENSP00000253099 | ENSP00000354525 |
| ENSP00000253099 | ENSP00000359345 |
| ENSP00000253099 | ENSP00000360031 |
| ENSP00000253099 | ENSP00000360498 |
| ENSP00000253099 | ENSP00000361076 |
| ENSP00000253099 | ENSP00000362744 |
| ENSP00000253099 | ENSP00000363018 |
| ENSP00000253099 | ENSP00000363676 |
| ENSP00000253099 | ENSP00000364320 |
| ENSP00000253099 | ENSP00000369757 |
| ENSP00000253099 | ENSP00000369965 |
| ENSP00000253099 | ENSP00000370930 |
| ENSP00000253099 | ENSP00000373404 |
| ENSP00000253099 | ENSP00000375730 |
| ENSP00000253099 | ENSP00000377486 |
| ENSP00000253099 | ENSP00000377640 |
| ENSP00000253099 | ENSP00000377865 |
| ENSP00000253099 | ENSP00000378160 |
| ENSP00000253099 | ENSP00000379888 |
| ENSP00000253099 | ENSP00000380156 |
| ENSP00000253099 | ENSP00000380982 |
| ENSP00000253099 | ENSP00000382392 |
| ENSP00000253099 | ENSP00000386717 |
| ENSP00000253099 | ENSP00000389103 |
| ENSP00000253099 | ENSP00000393393 |
| ENSP00000253099 | ENSP00000402338 |
| ENSP00000253099 | ENSP00000403817 |
| ENSP00000253099 | ENSP00000414321 |
| ENSP00000253099 | ENSP00000417229 |
| ENSP00000253099 | ENSP00000417602 |
| ENSP00000253107 | ENSP00000254037 |
| ENSP00000253107 | ENSP00000254605 |
| ENSP00000253107 | ENSP00000254940 |
| ENSP00000253107 | ENSP00000256383 |
| ENSP00000253107 | ENSP00000259469 |
| ENSP00000253107 | ENSP00000259569 |
| ENSP00000253107 | ENSP00000260210 |

|                 |                 |
|-----------------|-----------------|
| ENSP00000253107 | ENSP00000260443 |
| ENSP00000253107 | ENSP00000261015 |
| ENSP00000253107 | ENSP00000261868 |
| ENSP00000253107 | ENSP00000262294 |
| ENSP00000253107 | ENSP00000262518 |
| ENSP00000253107 | ENSP00000264670 |
| ENSP00000253107 | ENSP00000265304 |
| ENSP00000253107 | ENSP00000269127 |
| ENSP00000253107 | ENSP00000269385 |
| ENSP00000253107 | ENSP00000274606 |
| ENSP00000253107 | ENSP00000278412 |
| ENSP00000253107 | ENSP00000278856 |
| ENSP00000253107 | ENSP00000283351 |
| ENSP00000253107 | ENSP00000287038 |
| ENSP00000253107 | ENSP00000290158 |
| ENSP00000253107 | ENSP00000291634 |
| ENSP00000253107 | ENSP00000296802 |
| ENSP00000253107 | ENSP00000298310 |
| ENSP00000253107 | ENSP00000298746 |
| ENSP00000253107 | ENSP00000299601 |
| ENSP00000253107 | ENSP00000300648 |
| ENSP00000253107 | ENSP00000302768 |
| ENSP00000253107 | ENSP00000304593 |
| ENSP00000253107 | ENSP00000305702 |
| ENSP00000253107 | ENSP00000309830 |
| ENSP00000253107 | ENSP00000310596 |
| ENSP00000253107 | ENSP00000311343 |
| ENSP00000253107 | ENSP00000312735 |
| ENSP00000253107 | ENSP00000314348 |
| ENSP00000253107 | ENSP00000314971 |
| ENSP00000253107 | ENSP00000316879 |
| ENSP00000253107 | ENSP00000317992 |
| ENSP00000253107 | ENSP00000320566 |
| ENSP00000253107 | ENSP00000322396 |
| ENSP00000253107 | ENSP00000322570 |
| ENSP00000253107 | ENSP00000323424 |
| ENSP00000253107 | ENSP00000323858 |
| ENSP00000253107 | ENSP00000328690 |
| ENSP00000253107 | ENSP00000331817 |
| ENSP00000253107 | ENSP00000336712 |
| ENSP00000253107 | ENSP00000337839 |
| ENSP00000253107 | ENSP00000338862 |
| ENSP00000253107 | ENSP00000339145 |
| ENSP00000253107 | ENSP00000339795 |
| ENSP00000253107 | ENSP00000339845 |
| ENSP00000253107 | ENSP00000340281 |

|                 |                 |
|-----------------|-----------------|
| ENSP00000253107 | ENSP00000343745 |
| ENSP00000253107 | ENSP00000345917 |
| ENSP00000253107 | ENSP00000346120 |
| ENSP00000253107 | ENSP00000346453 |
| ENSP00000253107 | ENSP00000346725 |
| ENSP00000253107 | ENSP00000348107 |
| ENSP00000253107 | ENSP00000350967 |
| ENSP00000253107 | ENSP00000351697 |
| ENSP00000253107 | ENSP00000353246 |
| ENSP00000253107 | ENSP00000354040 |
| ENSP00000253107 | ENSP00000354522 |
| ENSP00000253107 | ENSP00000354673 |
| ENSP00000253107 | ENSP00000355013 |
| ENSP00000253107 | ENSP00000355899 |
| ENSP00000253107 | ENSP00000356290 |
| ENSP00000253107 | ENSP00000356405 |
| ENSP00000253107 | ENSP00000356989 |
| ENSP00000253107 | ENSP00000357048 |
| ENSP00000253107 | ENSP00000358497 |
| ENSP00000253107 | ENSP00000358563 |
| ENSP00000253107 | ENSP00000358605 |
| ENSP00000253107 | ENSP00000358812 |
| ENSP00000253107 | ENSP00000359345 |
| ENSP00000253107 | ENSP00000359518 |
| ENSP00000253107 | ENSP00000359688 |
| ENSP00000253107 | ENSP00000359939 |
| ENSP00000253107 | ENSP00000360412 |
| ENSP00000253107 | ENSP00000360828 |
| ENSP00000253107 | ENSP00000361010 |
| ENSP00000253107 | ENSP00000361092 |
| ENSP00000253107 | ENSP00000361232 |
| ENSP00000253107 | ENSP00000361465 |
| ENSP00000253107 | ENSP00000361982 |
| ENSP00000253107 | ENSP00000362576 |
| ENSP00000253107 | ENSP00000363559 |
| ENSP00000253107 | ENSP00000364320 |
| ENSP00000253107 | ENSP00000365025 |
| ENSP00000253107 | ENSP00000366135 |
| ENSP00000253107 | ENSP00000366395 |
| ENSP00000253107 | ENSP00000366519 |
| ENSP00000253107 | ENSP00000367029 |
| ENSP00000253107 | ENSP00000368349 |
| ENSP00000253107 | ENSP00000368887 |
| ENSP00000253107 | ENSP00000369716 |
| ENSP00000253107 | ENSP00000370589 |
| ENSP00000253107 | ENSP00000371201 |

|                 |                 |
|-----------------|-----------------|
| ENSP00000253107 | ENSP00000372199 |
| ENSP00000253107 | ENSP00000374213 |
| ENSP00000253107 | ENSP00000374280 |
| ENSP00000253107 | ENSP00000374390 |
| ENSP00000253107 | ENSP00000377640 |
| ENSP00000253107 | ENSP00000377747 |
| ENSP00000253107 | ENSP00000379888 |
| ENSP00000253107 | ENSP00000380156 |
| ENSP00000253107 | ENSP00000380453 |
| ENSP00000253107 | ENSP00000380982 |
| ENSP00000253107 | ENSP00000382392 |
| ENSP00000253107 | ENSP00000386134 |
| ENSP00000253107 | ENSP00000388464 |
| ENSP00000253107 | ENSP00000392028 |
| ENSP00000253107 | ENSP00000396704 |
| ENSP00000253107 | ENSP00000402338 |
| ENSP00000253107 | ENSP00000419740 |
| ENSP00000253108 | ENSP00000254037 |
| ENSP00000253108 | ENSP00000258169 |
| ENSP00000253108 | ENSP00000260129 |
| ENSP00000253108 | ENSP00000261531 |
| ENSP00000253108 | ENSP00000261868 |
| ENSP00000253108 | ENSP00000262056 |
| ENSP00000253108 | ENSP00000268616 |
| ENSP00000253108 | ENSP00000269127 |
| ENSP00000253108 | ENSP00000269499 |
| ENSP00000253108 | ENSP00000270625 |
| ENSP00000253108 | ENSP00000278572 |
| ENSP00000253108 | ENSP00000281141 |
| ENSP00000253108 | ENSP00000287295 |
| ENSP00000253108 | ENSP00000289371 |
| ENSP00000253108 | ENSP00000296577 |
| ENSP00000253108 | ENSP00000307863 |
| ENSP00000253108 | ENSP00000307889 |
| ENSP00000253108 | ENSP00000308622 |
| ENSP00000253108 | ENSP00000310040 |
| ENSP00000253108 | ENSP00000310448 |
| ENSP00000253108 | ENSP00000310668 |
| ENSP00000253108 | ENSP00000311028 |
| ENSP00000253108 | ENSP00000318195 |
| ENSP00000253108 | ENSP00000318604 |
| ENSP00000253108 | ENSP00000320917 |
| ENSP00000253108 | ENSP00000322396 |
| ENSP00000253108 | ENSP00000323856 |
| ENSP00000253108 | ENSP00000325448 |
| ENSP00000253108 | ENSP00000336702 |

|                 |                 |
|-----------------|-----------------|
| ENSP00000253108 | ENSP00000337839 |
| ENSP00000253108 | ENSP00000338862 |
| ENSP00000253108 | ENSP00000344241 |
| ENSP00000253108 | ENSP00000346453 |
| ENSP00000253108 | ENSP00000346725 |
| ENSP00000253108 | ENSP00000348157 |
| ENSP00000253108 | ENSP00000348455 |
| ENSP00000253108 | ENSP00000350249 |
| ENSP00000253108 | ENSP00000350512 |
| ENSP00000253108 | ENSP00000351492 |
| ENSP00000253108 | ENSP00000354040 |
| ENSP00000253108 | ENSP00000354125 |
| ENSP00000253108 | ENSP00000358140 |
| ENSP00000253108 | ENSP00000359345 |
| ENSP00000253108 | ENSP00000359531 |
| ENSP00000253108 | ENSP00000360532 |
| ENSP00000253108 | ENSP00000361949 |
| ENSP00000253108 | ENSP00000362110 |
| ENSP00000253108 | ENSP00000362688 |
| ENSP00000253108 | ENSP00000362936 |
| ENSP00000253108 | ENSP00000363944 |
| ENSP00000253108 | ENSP00000364289 |
| ENSP00000253108 | ENSP00000365025 |
| ENSP00000253108 | ENSP00000368887 |
| ENSP00000253108 | ENSP00000368927 |
| ENSP00000253108 | ENSP00000369716 |
| ENSP00000253108 | ENSP00000369757 |
| ENSP00000253108 | ENSP00000377496 |
| ENSP00000253108 | ENSP00000377747 |
| ENSP00000253108 | ENSP00000379607 |
| ENSP00000253108 | ENSP00000379888 |
| ENSP00000253108 | ENSP00000380982 |
| ENSP00000253108 | ENSP00000384302 |
| ENSP00000253108 | ENSP00000387170 |
| ENSP00000253108 | ENSP00000388872 |
| ENSP00000253108 | ENSP00000392028 |
| ENSP00000253108 | ENSP00000402338 |
| ENSP00000253108 | ENSP00000416892 |
| ENSP00000253110 | ENSP00000276603 |
| ENSP00000253233 | ENSP00000258975 |
| ENSP00000253233 | ENSP00000270625 |
| ENSP00000253233 | ENSP00000278572 |
| ENSP00000253233 | ENSP00000302896 |
| ENSP00000253233 | ENSP00000318646 |
| ENSP00000253233 | ENSP00000326981 |
| ENSP00000253233 | ENSP00000393241 |

|                 |                 |
|-----------------|-----------------|
| ENSP00000253233 | ENSP00000403175 |
| ENSP00000253233 | ENSP00000412583 |
| ENSP00000253233 | ENSP00000416110 |
| ENSP00000253237 | ENSP00000256578 |
| ENSP00000253237 | ENSP00000263265 |
| ENSP00000253237 | ENSP00000268661 |
| ENSP00000253237 | ENSP00000271628 |
| ENSP00000253237 | ENSP00000278572 |
| ENSP00000253237 | ENSP00000282388 |
| ENSP00000253237 | ENSP00000282412 |
| ENSP00000253237 | ENSP00000290231 |
| ENSP00000253237 | ENSP00000301019 |
| ENSP00000253237 | ENSP00000301764 |
| ENSP00000253237 | ENSP00000302955 |
| ENSP00000253237 | ENSP00000310448 |
| ENSP00000253237 | ENSP00000315700 |
| ENSP00000253237 | ENSP00000318646 |
| ENSP00000253237 | ENSP00000339145 |
| ENSP00000253237 | ENSP00000339795 |
| ENSP00000253237 | ENSP00000341885 |
| ENSP00000253237 | ENSP00000344741 |
| ENSP00000253237 | ENSP00000346725 |
| ENSP00000253237 | ENSP00000352645 |
| ENSP00000253237 | ENSP00000353246 |
| ENSP00000253237 | ENSP00000354040 |
| ENSP00000253237 | ENSP00000355958 |
| ENSP00000253237 | ENSP00000356641 |
| ENSP00000253237 | ENSP00000358400 |
| ENSP00000253237 | ENSP00000366135 |
| ENSP00000253237 | ENSP00000368468 |
| ENSP00000253237 | ENSP00000368612 |
| ENSP00000253237 | ENSP00000369757 |
| ENSP00000253237 | ENSP00000370258 |
| ENSP00000253237 | ENSP00000379607 |
| ENSP00000253237 | ENSP00000381657 |
| ENSP00000253237 | ENSP00000384109 |
| ENSP00000253247 | ENSP00000263209 |
| ENSP00000253303 | ENSP00000263934 |
| ENSP00000253303 | ENSP00000286091 |
| ENSP00000253303 | ENSP00000290332 |
| ENSP00000253303 | ENSP00000301729 |
| ENSP00000253303 | ENSP00000359699 |
| ENSP00000253303 | ENSP00000361467 |
| ENSP00000253303 | ENSP00000370376 |
| ENSP00000253303 | ENSP00000383059 |
| ENSP00000253303 | ENSP00000394071 |

|                 |                 |
|-----------------|-----------------|
| ENSP00000253303 | ENSP00000406293 |
| ENSP00000253303 | ENSP00000417686 |
| ENSP00000253329 | ENSP00000259569 |
| ENSP00000253329 | ENSP00000261531 |
| ENSP00000253329 | ENSP00000338862 |
| ENSP00000253329 | ENSP00000339723 |
| ENSP00000253329 | ENSP00000343535 |
| ENSP00000253329 | ENSP00000354040 |
| ENSP00000253329 | ENSP00000358242 |
| ENSP00000253329 | ENSP00000359042 |
| ENSP00000253329 | ENSP00000359345 |
| ENSP00000253329 | ENSP00000360532 |
| ENSP00000253329 | ENSP00000380982 |
| ENSP00000253332 | ENSP00000312262 |
| ENSP00000253339 | ENSP00000258418 |
| ENSP00000253339 | ENSP00000261402 |
| ENSP00000253339 | ENSP00000263228 |
| ENSP00000253339 | ENSP00000263360 |
| ENSP00000253339 | ENSP00000276014 |
| ENSP00000253339 | ENSP00000282441 |
| ENSP00000253339 | ENSP00000305422 |
| ENSP00000253339 | ENSP00000307023 |
| ENSP00000253339 | ENSP00000308339 |
| ENSP00000253339 | ENSP00000309103 |
| ENSP00000253339 | ENSP00000315702 |
| ENSP00000253339 | ENSP00000318089 |
| ENSP00000253339 | ENSP00000319169 |
| ENSP00000253339 | ENSP00000321711 |
| ENSP00000253339 | ENSP00000322957 |
| ENSP00000253339 | ENSP00000324422 |
| ENSP00000253339 | ENSP00000324729 |
| ENSP00000253339 | ENSP00000336740 |
| ENSP00000253339 | ENSP00000336790 |
| ENSP00000253339 | ENSP00000346809 |
| ENSP00000253339 | ENSP00000351113 |
| ENSP00000253339 | ENSP00000351327 |
| ENSP00000253339 | ENSP00000354916 |
| ENSP00000253339 | ENSP00000361009 |
| ENSP00000253339 | ENSP00000367407 |
| ENSP00000253339 | ENSP00000396704 |
| ENSP00000253339 | ENSP00000417281 |
| ENSP00000253354 | ENSP00000379607 |
| ENSP00000253363 | ENSP00000255764 |
| ENSP00000253363 | ENSP00000257181 |
| ENSP00000253363 | ENSP00000261531 |
| ENSP00000253363 | ENSP00000261973 |



|                 |                 |
|-----------------|-----------------|
| ENSP00000253363 | ENSP00000262710 |
| ENSP00000253363 | ENSP00000267812 |
| ENSP00000253363 | ENSP00000278572 |
| ENSP00000253363 | ENSP00000296015 |
| ENSP00000253363 | ENSP00000296702 |
| ENSP00000253363 | ENSP00000300413 |
| ENSP00000253363 | ENSP00000301740 |
| ENSP00000253363 | ENSP00000303191 |
| ENSP00000253363 | ENSP00000304370 |
| ENSP00000253363 | ENSP00000307863 |
| ENSP00000253363 | ENSP00000313829 |
| ENSP00000253363 | ENSP00000315379 |
| ENSP00000253363 | ENSP00000315859 |
| ENSP00000253363 | ENSP00000324274 |
| ENSP00000253363 | ENSP00000325120 |
| ENSP00000253363 | ENSP00000326261 |
| ENSP00000253363 | ENSP00000329466 |
| ENSP00000253363 | ENSP00000330188 |
| ENSP00000253363 | ENSP00000333275 |
| ENSP00000253363 | ENSP00000334148 |
| ENSP00000253363 | ENSP00000335321 |
| ENSP00000253363 | ENSP00000337340 |
| ENSP00000253363 | ENSP00000339723 |
| ENSP00000253363 | ENSP00000341885 |
| ENSP00000253363 | ENSP00000344456 |
| ENSP00000253363 | ENSP00000346015 |
| ENSP00000253363 | ENSP00000346725 |
| ENSP00000253363 | ENSP00000346762 |
| ENSP00000253363 | ENSP00000347592 |
| ENSP00000253363 | ENSP00000349594 |
| ENSP00000253363 | ENSP00000351894 |
| ENSP00000253363 | ENSP00000352257 |
| ENSP00000253363 | ENSP00000354673 |
| ENSP00000253363 | ENSP00000355050 |
| ENSP00000253363 | ENSP00000357631 |
| ENSP00000253363 | ENSP00000360286 |
| ENSP00000253363 | ENSP00000360464 |
| ENSP00000253363 | ENSP00000360497 |
| ENSP00000253363 | ENSP00000360532 |
| ENSP00000253363 | ENSP00000361162 |
| ENSP00000253363 | ENSP00000362820 |
| ENSP00000253363 | ENSP00000377262 |
| ENSP00000253363 | ENSP00000379607 |
| ENSP00000253363 | ENSP00000391432 |
| ENSP00000253363 | ENSP00000391723 |
| ENSP00000253363 | ENSP00000416959 |

|                 |                 |
|-----------------|-----------------|
| ENSP00000253413 | ENSP00000253794 |
| ENSP00000253413 | ENSP00000261758 |
| ENSP00000253413 | ENSP00000263856 |
| ENSP00000253413 | ENSP00000272238 |
| ENSP00000253413 | ENSP00000273398 |
| ENSP00000253413 | ENSP00000297265 |
| ENSP00000253413 | ENSP00000308944 |
| ENSP00000253413 | ENSP00000310440 |
| ENSP00000253413 | ENSP00000322706 |
| ENSP00000253413 | ENSP00000332247 |
| ENSP00000253413 | ENSP00000333873 |
| ENSP00000253413 | ENSP00000333946 |
| ENSP00000253413 | ENSP00000336927 |
| ENSP00000253413 | ENSP00000343313 |
| ENSP00000253413 | ENSP00000352522 |
| ENSP00000253413 | ENSP00000354673 |
| ENSP00000253413 | ENSP00000356723 |
| ENSP00000253413 | ENSP00000358478 |
| ENSP00000253413 | ENSP00000363162 |
| ENSP00000253413 | ENSP00000366513 |
| ENSP00000253413 | ENSP00000367299 |
| ENSP00000253413 | ENSP00000368439 |
| ENSP00000253413 | ENSP00000384675 |
| ENSP00000253413 | ENSP00000386722 |
| ENSP00000253413 | ENSP00000386738 |
| ENSP00000253413 | ENSP00000389934 |
| ENSP00000253413 | ENSP00000407487 |
| ENSP00000253457 | ENSP00000267750 |
| ENSP00000253457 | ENSP00000397435 |
| ENSP00000253457 | ENSP00000420608 |
| ENSP00000253458 | ENSP00000336524 |
| ENSP00000253458 | ENSP00000349049 |
| ENSP00000253458 | ENSP00000355231 |
| ENSP00000253458 | ENSP00000360532 |
| ENSP00000253458 | ENSP00000398597 |
| ENSP00000253458 | ENSP00000399511 |
| ENSP00000253462 | ENSP00000260810 |
| ENSP00000253462 | ENSP00000261881 |
| ENSP00000253462 | ENSP00000262460 |
| ENSP00000253462 | ENSP00000263201 |
| ENSP00000253462 | ENSP00000265056 |
| ENSP00000253462 | ENSP00000265140 |
| ENSP00000253462 | ENSP00000276533 |
| ENSP00000253462 | ENSP00000291386 |
| ENSP00000253462 | ENSP00000304370 |
| ENSP00000253462 | ENSP00000312870 |

|                 |                 |
|-----------------|-----------------|
| ENSP00000253462 | ENSP00000313420 |
| ENSP00000253462 | ENSP00000317872 |
| ENSP00000253462 | ENSP00000330875 |
| ENSP00000253462 | ENSP00000334148 |
| ENSP00000253462 | ENSP00000343741 |
| ENSP00000253462 | ENSP00000349298 |
| ENSP00000253462 | ENSP00000353793 |
| ENSP00000253462 | ENSP00000372023 |
| ENSP00000253462 | ENSP00000393596 |
| ENSP00000253462 | ENSP00000401018 |
| ENSP00000253462 | ENSP00000413632 |
| ENSP00000253490 | ENSP00000304593 |
| ENSP00000253490 | ENSP00000336842 |
| ENSP00000253490 | ENSP00000348163 |
| ENSP00000253490 | ENSP00000357887 |
| ENSP00000253669 | ENSP00000260372 |
| ENSP00000253669 | ENSP00000282058 |
| ENSP00000253669 | ENSP00000369871 |
| ENSP00000253680 | ENSP00000371341 |
| ENSP00000253686 | ENSP00000301585 |
| ENSP00000253686 | ENSP00000346120 |
| ENSP00000253693 | ENSP00000256474 |
| ENSP00000253693 | ENSP00000261211 |
| ENSP00000253693 | ENSP00000263228 |
| ENSP00000253693 | ENSP00000297265 |
| ENSP00000253693 | ENSP00000330408 |
| ENSP00000253693 | ENSP00000343190 |
| ENSP00000253693 | ENSP00000356405 |
| ENSP00000253693 | ENSP00000366607 |
| ENSP00000253699 | ENSP00000259400 |
| ENSP00000253699 | ENSP00000260818 |
| ENSP00000253699 | ENSP00000262039 |
| ENSP00000253699 | ENSP00000273375 |
| ENSP00000253699 | ENSP00000273398 |
| ENSP00000253699 | ENSP00000327650 |
| ENSP00000253699 | ENSP00000341680 |
| ENSP00000253699 | ENSP00000360183 |
| ENSP00000253699 | ENSP00000369810 |
| ENSP00000253719 | ENSP00000260187 |
| ENSP00000253719 | ENSP00000262215 |
| ENSP00000253719 | ENSP00000265304 |
| ENSP00000253719 | ENSP00000290649 |
| ENSP00000253719 | ENSP00000302239 |
| ENSP00000253719 | ENSP00000308944 |
| ENSP00000253719 | ENSP00000310440 |
| ENSP00000253719 | ENSP00000324560 |

|                 |                 |
|-----------------|-----------------|
| ENSP00000253719 | ENSP00000331201 |
| ENSP00000253719 | ENSP00000341551 |
| ENSP00000253719 | ENSP00000343435 |
| ENSP00000253719 | ENSP00000347495 |
| ENSP00000253719 | ENSP00000358478 |
| ENSP00000253719 | ENSP00000366395 |
| ENSP00000253719 | ENSP00000367299 |
| ENSP00000253788 | ENSP00000254037 |
| ENSP00000253788 | ENSP00000254940 |
| ENSP00000253788 | ENSP00000257829 |
| ENSP00000253788 | ENSP00000258455 |
| ENSP00000253788 | ENSP00000259469 |
| ENSP00000253788 | ENSP00000260102 |
| ENSP00000253788 | ENSP00000260443 |
| ENSP00000253788 | ENSP00000262584 |
| ENSP00000253788 | ENSP00000264995 |
| ENSP00000253788 | ENSP00000265100 |
| ENSP00000253788 | ENSP00000265245 |
| ENSP00000253788 | ENSP00000268616 |
| ENSP00000253788 | ENSP00000268661 |
| ENSP00000253788 | ENSP00000269499 |
| ENSP00000253788 | ENSP00000270625 |
| ENSP00000253788 | ENSP00000272418 |
| ENSP00000253788 | ENSP00000274242 |
| ENSP00000253788 | ENSP00000274606 |
| ENSP00000253788 | ENSP00000278572 |
| ENSP00000253788 | ENSP00000287038 |
| ENSP00000253788 | ENSP00000294189 |
| ENSP00000253788 | ENSP00000296674 |
| ENSP00000253788 | ENSP00000296802 |
| ENSP00000253788 | ENSP00000298283 |
| ENSP00000253788 | ENSP00000300151 |
| ENSP00000253788 | ENSP00000302886 |
| ENSP00000253788 | ENSP00000302896 |
| ENSP00000253788 | ENSP00000305702 |
| ENSP00000253788 | ENSP00000306548 |
| ENSP00000253788 | ENSP00000307889 |
| ENSP00000253788 | ENSP00000308897 |
| ENSP00000253788 | ENSP00000309334 |
| ENSP00000253788 | ENSP00000309830 |
| ENSP00000253788 | ENSP00000311028 |
| ENSP00000253788 | ENSP00000311430 |
| ENSP00000253788 | ENSP00000314348 |
| ENSP00000253788 | ENSP00000315791 |
| ENSP00000253788 | ENSP00000317376 |
| ENSP00000253788 | ENSP00000318646 |

|                 |                 |
|-----------------|-----------------|
| ENSP00000253788 | ENSP00000322419 |
| ENSP00000253788 | ENSP00000326981 |
| ENSP00000253788 | ENSP00000336702 |
| ENSP00000253788 | ENSP00000337839 |
| ENSP00000253788 | ENSP00000338573 |
| ENSP00000253788 | ENSP00000338862 |
| ENSP00000253788 | ENSP00000339095 |
| ENSP00000253788 | ENSP00000339795 |
| ENSP00000253788 | ENSP00000341885 |
| ENSP00000253788 | ENSP00000345156 |
| ENSP00000253788 | ENSP00000346015 |
| ENSP00000253788 | ENSP00000346022 |
| ENSP00000253788 | ENSP00000346027 |
| ENSP00000253788 | ENSP00000346037 |
| ENSP00000253788 | ENSP00000346050 |
| ENSP00000253788 | ENSP00000346088 |
| ENSP00000253788 | ENSP00000346120 |
| ENSP00000253788 | ENSP00000346725 |
| ENSP00000253788 | ENSP00000348010 |
| ENSP00000253788 | ENSP00000351596 |
| ENSP00000253788 | ENSP00000354040 |
| ENSP00000253788 | ENSP00000354525 |
| ENSP00000253788 | ENSP00000354739 |
| ENSP00000253788 | ENSP00000356290 |
| ENSP00000253788 | ENSP00000359345 |
| ENSP00000253788 | ENSP00000361076 |
| ENSP00000253788 | ENSP00000362153 |
| ENSP00000253788 | ENSP00000362306 |
| ENSP00000253788 | ENSP00000362744 |
| ENSP00000253788 | ENSP00000363018 |
| ENSP00000253788 | ENSP00000363559 |
| ENSP00000253788 | ENSP00000363676 |
| ENSP00000253788 | ENSP00000364320 |
| ENSP00000253788 | ENSP00000366519 |
| ENSP00000253788 | ENSP00000369757 |
| ENSP00000253788 | ENSP00000373404 |
| ENSP00000253788 | ENSP00000374390 |
| ENSP00000253788 | ENSP00000375730 |
| ENSP00000253788 | ENSP00000377640 |
| ENSP00000253788 | ENSP00000377865 |
| ENSP00000253788 | ENSP00000378160 |
| ENSP00000253788 | ENSP00000379607 |
| ENSP00000253788 | ENSP00000379888 |
| ENSP00000253788 | ENSP00000380156 |
| ENSP00000253788 | ENSP00000380982 |
| ENSP00000253788 | ENSP00000382392 |

|                 |                 |
|-----------------|-----------------|
| ENSP00000253788 | ENSP00000386717 |
| ENSP00000253788 | ENSP00000389103 |
| ENSP00000253788 | ENSP00000391723 |
| ENSP00000253788 | ENSP00000393393 |
| ENSP00000253788 | ENSP00000402338 |
| ENSP00000253788 | ENSP00000414321 |
| ENSP00000253792 | ENSP00000254942 |
| ENSP00000253792 | ENSP00000255465 |
| ENSP00000253792 | ENSP00000256216 |
| ENSP00000253792 | ENSP00000257829 |
| ENSP00000253792 | ENSP00000258886 |
| ENSP00000253792 | ENSP00000262193 |
| ENSP00000253792 | ENSP00000264335 |
| ENSP00000253792 | ENSP00000264705 |
| ENSP00000253792 | ENSP00000269980 |
| ENSP00000253792 | ENSP00000273075 |
| ENSP00000253792 | ENSP00000276603 |
| ENSP00000253792 | ENSP00000280346 |
| ENSP00000253792 | ENSP00000282050 |
| ENSP00000253792 | ENSP00000304592 |
| ENSP00000253792 | ENSP00000314129 |
| ENSP00000253792 | ENSP00000329466 |
| ENSP00000253792 | ENSP00000331201 |
| ENSP00000253792 | ENSP00000335304 |
| ENSP00000253792 | ENSP00000349142 |
| ENSP00000253792 | ENSP00000353741 |
| ENSP00000253792 | ENSP00000353804 |
| ENSP00000253792 | ENSP00000354347 |
| ENSP00000253792 | ENSP00000355153 |
| ENSP00000253792 | ENSP00000360268 |
| ENSP00000253792 | ENSP00000366482 |
| ENSP00000253792 | ENSP00000367615 |
| ENSP00000253792 | ENSP00000377527 |
| ENSP00000253792 | ENSP00000379607 |
| ENSP00000253792 | ENSP00000381654 |
| ENSP00000253792 | ENSP00000394382 |
| ENSP00000253794 | ENSP00000263856 |
| ENSP00000253794 | ENSP00000273398 |
| ENSP00000253794 | ENSP00000290330 |
| ENSP00000253794 | ENSP00000310440 |
| ENSP00000253794 | ENSP00000317468 |
| ENSP00000253794 | ENSP00000334061 |
| ENSP00000253794 | ENSP00000366565 |
| ENSP00000253794 | ENSP00000367299 |
| ENSP00000253796 | ENSP00000331746 |
| ENSP00000253801 | ENSP00000355944 |

|                 |                 |
|-----------------|-----------------|
| ENSP00000253801 | ENSP00000398789 |
| ENSP00000253861 | ENSP00000261531 |
| ENSP00000253861 | ENSP00000264380 |
| ENSP00000253861 | ENSP00000272427 |
| ENSP00000253861 | ENSP00000272972 |
| ENSP00000253861 | ENSP00000273666 |
| ENSP00000253861 | ENSP00000276416 |
| ENSP00000253861 | ENSP00000303554 |
| ENSP00000253861 | ENSP00000311505 |
| ENSP00000253861 | ENSP00000322170 |
| ENSP00000253861 | ENSP00000323377 |
| ENSP00000253861 | ENSP00000325506 |
| ENSP00000253861 | ENSP00000326514 |
| ENSP00000253861 | ENSP00000327650 |
| ENSP00000253861 | ENSP00000334100 |
| ENSP00000253861 | ENSP00000336524 |
| ENSP00000253861 | ENSP00000341538 |
| ENSP00000253861 | ENSP00000341680 |
| ENSP00000253861 | ENSP00000343313 |
| ENSP00000253861 | ENSP00000348168 |
| ENSP00000253861 | ENSP00000348215 |
| ENSP00000253861 | ENSP00000348602 |
| ENSP00000253861 | ENSP00000353564 |
| ENSP00000253861 | ENSP00000354519 |
| ENSP00000253861 | ENSP00000355231 |
| ENSP00000253861 | ENSP00000355721 |
| ENSP00000253861 | ENSP00000356231 |
| ENSP00000253861 | ENSP00000360532 |
| ENSP00000253861 | ENSP00000362399 |
| ENSP00000253861 | ENSP00000365630 |
| ENSP00000253861 | ENSP00000369318 |
| ENSP00000253861 | ENSP00000369860 |
| ENSP00000253861 | ENSP00000373399 |
| ENSP00000253861 | ENSP00000376268 |
| ENSP00000253861 | ENSP00000378736 |
| ENSP00000253861 | ENSP00000380450 |
| ENSP00000253861 | ENSP00000382177 |
| ENSP00000253861 | ENSP00000389934 |
| ENSP00000253861 | ENSP00000390783 |
| ENSP00000253861 | ENSP00000393596 |
| ENSP00000253861 | ENSP00000394071 |
| ENSP00000254029 | ENSP00000264515 |
| ENSP00000254029 | ENSP00000309555 |
| ENSP00000254029 | ENSP00000324122 |
| ENSP00000254029 | ENSP00000340896 |
| ENSP00000254029 | ENSP00000349640 |

|                 |                 |
|-----------------|-----------------|
| ENSP00000254029 | ENSP00000351490 |
| ENSP00000254029 | ENSP00000359976 |
| ENSP00000254029 | ENSP00000362413 |
| ENSP00000254029 | ENSP00000363944 |
| ENSP00000254029 | ENSP00000364037 |
| ENSP00000254029 | ENSP00000370150 |
| ENSP00000254029 | ENSP00000391457 |
| ENSP00000254029 | ENSP00000396439 |
| ENSP00000254029 | ENSP00000411851 |
| ENSP00000254035 | ENSP00000268668 |
| ENSP00000254035 | ENSP00000277865 |
| ENSP00000254035 | ENSP00000294053 |
| ENSP00000254035 | ENSP00000295962 |
| ENSP00000254035 | ENSP00000307786 |
| ENSP00000254035 | ENSP00000317159 |
| ENSP00000254035 | ENSP00000330945 |
| ENSP00000254035 | ENSP00000341838 |
| ENSP00000254035 | ENSP00000355587 |
| ENSP00000254035 | ENSP00000362413 |
| ENSP00000254035 | ENSP00000363873 |
| ENSP00000254037 | ENSP00000254940 |
| ENSP00000254037 | ENSP00000256897 |
| ENSP00000254037 | ENSP00000257177 |
| ENSP00000254037 | ENSP00000258455 |
| ENSP00000254037 | ENSP00000259469 |
| ENSP00000254037 | ENSP00000260102 |
| ENSP00000254037 | ENSP00000260210 |
| ENSP00000254037 | ENSP00000260443 |
| ENSP00000254037 | ENSP00000260956 |
| ENSP00000254037 | ENSP00000263629 |
| ENSP00000254037 | ENSP00000263657 |
| ENSP00000254037 | ENSP00000264995 |
| ENSP00000254037 | ENSP00000265100 |
| ENSP00000254037 | ENSP00000267750 |
| ENSP00000254037 | ENSP00000268802 |
| ENSP00000254037 | ENSP00000270625 |
| ENSP00000254037 | ENSP00000274606 |
| ENSP00000254037 | ENSP00000278572 |
| ENSP00000254037 | ENSP00000283109 |
| ENSP00000254037 | ENSP00000283875 |
| ENSP00000254037 | ENSP00000286835 |
| ENSP00000254037 | ENSP00000296577 |
| ENSP00000254037 | ENSP00000296702 |
| ENSP00000254037 | ENSP00000296783 |
| ENSP00000254037 | ENSP00000296786 |
| ENSP00000254037 | ENSP00000296802 |



|                 |                 |
|-----------------|-----------------|
| ENSP00000254037 | ENSP00000298746 |
| ENSP00000254037 | ENSP00000299601 |
| ENSP00000254037 | ENSP00000300151 |
| ENSP00000254037 | ENSP00000300413 |
| ENSP00000254037 | ENSP00000303279 |
| ENSP00000254037 | ENSP00000304350 |
| ENSP00000254037 | ENSP00000306548 |
| ENSP00000254037 | ENSP00000307525 |
| ENSP00000254037 | ENSP00000307863 |
| ENSP00000254037 | ENSP00000307889 |
| ENSP00000254037 | ENSP00000309334 |
| ENSP00000254037 | ENSP00000313350 |
| ENSP00000254037 | ENSP00000314311 |
| ENSP00000254037 | ENSP00000315674 |
| ENSP00000254037 | ENSP00000317992 |
| ENSP00000254037 | ENSP00000321449 |
| ENSP00000254037 | ENSP00000326411 |
| ENSP00000254037 | ENSP00000326806 |
| ENSP00000254037 | ENSP00000329558 |
| ENSP00000254037 | ENSP00000331310 |
| ENSP00000254037 | ENSP00000331369 |
| ENSP00000254037 | ENSP00000331817 |
| ENSP00000254037 | ENSP00000338788 |
| ENSP00000254037 | ENSP00000338862 |
| ENSP00000254037 | ENSP00000339095 |
| ENSP00000254037 | ENSP00000339795 |
| ENSP00000254037 | ENSP00000340019 |
| ENSP00000254037 | ENSP00000343081 |
| ENSP00000254037 | ENSP00000345917 |
| ENSP00000254037 | ENSP00000346015 |
| ENSP00000254037 | ENSP00000346050 |
| ENSP00000254037 | ENSP00000346088 |
| ENSP00000254037 | ENSP00000348168 |
| ENSP00000254037 | ENSP00000348596 |
| ENSP00000254037 | ENSP00000353246 |
| ENSP00000254037 | ENSP00000354525 |
| ENSP00000254037 | ENSP00000355471 |
| ENSP00000254037 | ENSP00000355572 |
| ENSP00000254037 | ENSP00000356134 |
| ENSP00000254037 | ENSP00000356146 |
| ENSP00000254037 | ENSP00000357748 |
| ENSP00000254037 | ENSP00000358563 |
| ENSP00000254037 | ENSP00000358812 |
| ENSP00000254037 | ENSP00000359606 |
| ENSP00000254037 | ENSP00000359688 |
| ENSP00000254037 | ENSP00000360412 |

|                 |                 |
|-----------------|-----------------|
| ENSP00000254037 | ENSP00000360473 |
| ENSP00000254037 | ENSP00000361076 |
| ENSP00000254037 | ENSP00000361092 |
| ENSP00000254037 | ENSP00000361982 |
| ENSP00000254037 | ENSP00000362036 |
| ENSP00000254037 | ENSP00000362105 |
| ENSP00000254037 | ENSP00000362413 |
| ENSP00000254037 | ENSP00000362900 |
| ENSP00000254037 | ENSP00000363384 |
| ENSP00000254037 | ENSP00000363559 |
| ENSP00000254037 | ENSP00000363676 |
| ENSP00000254037 | ENSP00000364119 |
| ENSP00000254037 | ENSP00000364289 |
| ENSP00000254037 | ENSP00000364293 |
| ENSP00000254037 | ENSP00000364543 |
| ENSP00000254037 | ENSP00000366135 |
| ENSP00000254037 | ENSP00000366519 |
| ENSP00000254037 | ENSP00000366557 |
| ENSP00000254037 | ENSP00000368565 |
| ENSP00000254037 | ENSP00000368801 |
| ENSP00000254037 | ENSP00000369757 |
| ENSP00000254037 | ENSP00000371169 |
| ENSP00000254037 | ENSP00000372827 |
| ENSP00000254037 | ENSP00000377344 |
| ENSP00000254037 | ENSP00000377640 |
| ENSP00000254037 | ENSP00000377865 |
| ENSP00000254037 | ENSP00000377944 |
| ENSP00000254037 | ENSP00000378160 |
| ENSP00000254037 | ENSP00000379888 |
| ENSP00000254037 | ENSP00000380982 |
| ENSP00000254037 | ENSP00000382392 |
| ENSP00000254037 | ENSP00000384302 |
| ENSP00000254037 | ENSP00000386134 |
| ENSP00000254037 | ENSP00000386717 |
| ENSP00000254037 | ENSP00000387170 |
| ENSP00000254037 | ENSP00000387219 |
| ENSP00000254037 | ENSP00000388464 |
| ENSP00000254037 | ENSP00000393393 |
| ENSP00000254037 | ENSP00000394400 |
| ENSP00000254037 | ENSP00000399530 |
| ENSP00000254037 | ENSP00000400626 |
| ENSP00000254037 | ENSP00000402338 |
| ENSP00000254037 | ENSP00000412310 |
| ENSP00000254037 | ENSP00000417229 |
| ENSP00000254037 | ENSP00000419599 |
| ENSP00000254037 | ENSP00000419851 |

|                 |                 |
|-----------------|-----------------|
| ENSP00000254051 | ENSP00000267101 |
| ENSP00000254079 | ENSP00000365025 |
| ENSP00000254101 | ENSP00000260270 |
| ENSP00000254101 | ENSP00000261712 |
| ENSP00000254101 | ENSP00000261819 |
| ENSP00000254101 | ENSP00000265857 |
| ENSP00000254101 | ENSP00000285021 |
| ENSP00000254101 | ENSP00000286070 |
| ENSP00000254101 | ENSP00000287239 |
| ENSP00000254101 | ENSP00000287878 |
| ENSP00000254101 | ENSP00000294724 |
| ENSP00000254101 | ENSP00000295685 |
| ENSP00000254101 | ENSP00000300648 |
| ENSP00000254101 | ENSP00000305958 |
| ENSP00000254101 | ENSP00000310842 |
| ENSP00000254101 | ENSP00000313420 |
| ENSP00000254101 | ENSP00000317904 |
| ENSP00000254101 | ENSP00000324560 |
| ENSP00000254101 | ENSP00000327145 |
| ENSP00000254101 | ENSP00000343745 |
| ENSP00000254101 | ENSP00000347134 |
| ENSP00000254101 | ENSP00000348215 |
| ENSP00000254101 | ENSP00000349594 |
| ENSP00000254101 | ENSP00000351908 |
| ENSP00000254101 | ENSP00000354347 |
| ENSP00000254101 | ENSP00000356489 |
| ENSP00000254101 | ENSP00000360112 |
| ENSP00000254101 | ENSP00000361310 |
| ENSP00000254101 | ENSP00000404812 |
| ENSP00000254193 | ENSP00000256854 |
| ENSP00000254193 | ENSP00000260129 |
| ENSP00000254193 | ENSP00000260210 |
| ENSP00000254193 | ENSP00000261531 |
| ENSP00000254193 | ENSP00000261973 |
| ENSP00000254193 | ENSP00000262460 |
| ENSP00000254193 | ENSP00000262962 |
| ENSP00000254193 | ENSP00000262982 |
| ENSP00000254193 | ENSP00000263073 |
| ENSP00000254193 | ENSP00000264670 |
| ENSP00000254193 | ENSP00000264883 |
| ENSP00000254193 | ENSP00000265753 |
| ENSP00000254193 | ENSP00000266079 |
| ENSP00000254193 | ENSP00000266735 |
| ENSP00000254193 | ENSP00000267812 |
| ENSP00000254193 | ENSP00000268482 |
| ENSP00000254193 | ENSP00000268483 |

|                 |                 |
|-----------------|-----------------|
| ENSP00000254193 | ENSP00000271628 |
| ENSP00000254193 | ENSP00000274712 |
| ENSP00000254193 | ENSP00000276570 |
| ENSP00000254193 | ENSP00000292476 |
| ENSP00000254193 | ENSP00000293406 |
| ENSP00000254193 | ENSP00000296702 |
| ENSP00000254193 | ENSP00000300413 |
| ENSP00000254193 | ENSP00000301740 |
| ENSP00000254193 | ENSP00000301764 |
| ENSP00000254193 | ENSP00000302160 |
| ENSP00000254193 | ENSP00000303191 |
| ENSP00000254193 | ENSP00000304350 |
| ENSP00000254193 | ENSP00000304370 |
| ENSP00000254193 | ENSP00000305790 |
| ENSP00000254193 | ENSP00000307684 |
| ENSP00000254193 | ENSP00000307863 |
| ENSP00000254193 | ENSP00000308533 |
| ENSP00000254193 | ENSP00000308546 |
| ENSP00000254193 | ENSP00000310448 |
| ENSP00000254193 | ENSP00000310723 |
| ENSP00000254193 | ENSP00000311135 |
| ENSP00000254193 | ENSP00000314311 |
| ENSP00000254193 | ENSP00000315035 |
| ENSP00000254193 | ENSP00000315379 |
| ENSP00000254193 | ENSP00000318195 |
| ENSP00000254193 | ENSP00000318861 |
| ENSP00000254193 | ENSP00000319341 |
| ENSP00000254193 | ENSP00000323302 |
| ENSP00000254193 | ENSP00000324122 |
| ENSP00000254193 | ENSP00000325677 |
| ENSP00000254193 | ENSP00000326261 |
| ENSP00000254193 | ENSP00000326806 |
| ENSP00000254193 | ENSP00000331817 |
| ENSP00000254193 | ENSP00000331907 |
| ENSP00000254193 | ENSP00000332103 |
| ENSP00000254193 | ENSP00000334148 |
| ENSP00000254193 | ENSP00000335321 |
| ENSP00000254193 | ENSP00000339090 |
| ENSP00000254193 | ENSP00000340766 |
| ENSP00000254193 | ENSP00000342374 |
| ENSP00000254193 | ENSP00000343081 |
| ENSP00000254193 | ENSP00000343557 |
| ENSP00000254193 | ENSP00000344241 |
| ENSP00000254193 | ENSP00000346986 |
| ENSP00000254193 | ENSP00000347087 |
| ENSP00000254193 | ENSP00000348010 |

|                 |                 |
|-----------------|-----------------|
| ENSP00000254193 | ENSP00000348722 |
| ENSP00000254193 | ENSP00000351137 |
| ENSP00000254193 | ENSP00000352738 |
| ENSP00000254193 | ENSP00000354522 |
| ENSP00000254193 | ENSP00000355261 |
| ENSP00000254193 | ENSP00000356405 |
| ENSP00000254193 | ENSP00000357631 |
| ENSP00000254193 | ENSP00000358605 |
| ENSP00000254193 | ENSP00000360515 |
| ENSP00000254193 | ENSP00000360532 |
| ENSP00000254193 | ENSP00000360876 |
| ENSP00000254193 | ENSP00000360992 |
| ENSP00000254193 | ENSP00000361949 |
| ENSP00000254193 | ENSP00000362110 |
| ENSP00000254193 | ENSP00000362900 |
| ENSP00000254193 | ENSP00000362936 |
| ENSP00000254193 | ENSP00000363313 |
| ENSP00000254193 | ENSP00000363734 |
| ENSP00000254193 | ENSP00000364289 |
| ENSP00000254193 | ENSP00000366557 |
| ENSP00000254193 | ENSP00000366843 |
| ENSP00000254193 | ENSP00000367030 |
| ENSP00000254193 | ENSP00000367835 |
| ENSP00000254193 | ENSP00000368438 |
| ENSP00000254193 | ENSP00000370083 |
| ENSP00000254193 | ENSP00000370119 |
| ENSP00000254193 | ENSP00000370460 |
| ENSP00000254193 | ENSP00000370589 |
| ENSP00000254193 | ENSP00000372694 |
| ENSP00000254193 | ENSP00000376309 |
| ENSP00000254193 | ENSP00000376973 |
| ENSP00000254193 | ENSP00000387006 |
| ENSP00000254193 | ENSP00000400591 |
| ENSP00000254193 | ENSP00000401371 |
| ENSP00000254193 | ENSP00000412319 |
| ENSP00000254193 | ENSP00000412566 |
| ENSP00000254193 | ENSP00000415678 |
| ENSP00000254193 | ENSP00000416959 |
| ENSP00000254193 | ENSP00000420195 |
| ENSP00000254250 | ENSP00000272139 |
| ENSP00000254250 | ENSP00000305503 |
| ENSP00000254250 | ENSP00000307863 |
| ENSP00000254250 | ENSP00000309555 |
| ENSP00000254250 | ENSP00000309606 |
| ENSP00000254250 | ENSP00000324274 |
| ENSP00000254250 | ENSP00000328088 |

|                 |                 |
|-----------------|-----------------|
| ENSP00000254250 | ENSP00000352185 |
| ENSP00000254250 | ENSP00000354951 |
| ENSP00000254250 | ENSP00000360464 |
| ENSP00000254250 | ENSP00000360532 |
| ENSP00000254250 | ENSP00000362824 |
| ENSP00000254301 | ENSP00000262776 |
| ENSP00000254301 | ENSP00000304364 |
| ENSP00000254301 | ENSP00000307387 |
| ENSP00000254301 | ENSP00000321706 |
| ENSP00000254301 | ENSP00000358918 |
| ENSP00000254301 | ENSP00000367064 |
| ENSP00000254301 | ENSP00000381031 |
| ENSP00000254301 | ENSP00000387426 |
| ENSP00000254325 | ENSP00000257934 |
| ENSP00000254325 | ENSP00000262367 |
| ENSP00000254325 | ENSP00000264758 |
| ENSP00000254325 | ENSP00000265717 |
| ENSP00000254325 | ENSP00000265990 |
| ENSP00000254325 | ENSP00000267064 |
| ENSP00000254325 | ENSP00000268057 |
| ENSP00000254325 | ENSP00000276072 |
| ENSP00000254325 | ENSP00000294168 |
| ENSP00000254325 | ENSP00000300738 |
| ENSP00000254325 | ENSP00000302955 |
| ENSP00000254325 | ENSP00000307208 |
| ENSP00000254325 | ENSP00000322570 |
| ENSP00000254325 | ENSP00000323880 |
| ENSP00000254325 | ENSP00000332171 |
| ENSP00000254325 | ENSP00000333920 |
| ENSP00000254325 | ENSP00000341243 |
| ENSP00000254325 | ENSP00000341551 |
| ENSP00000254325 | ENSP00000343741 |
| ENSP00000254325 | ENSP00000344537 |
| ENSP00000254325 | ENSP00000349213 |
| ENSP00000254325 | ENSP00000350708 |
| ENSP00000254325 | ENSP00000351284 |
| ENSP00000254325 | ENSP00000351697 |
| ENSP00000254325 | ENSP00000353458 |
| ENSP00000254325 | ENSP00000360532 |
| ENSP00000254325 | ENSP00000366974 |
| ENSP00000254325 | ENSP00000368349 |
| ENSP00000254325 | ENSP00000368438 |
| ENSP00000254325 | ENSP00000368646 |
| ENSP00000254325 | ENSP00000372023 |
| ENSP00000254325 | ENSP00000375986 |
| ENSP00000254336 | ENSP00000264389 |

|                 |                 |
|-----------------|-----------------|
| ENSP00000254336 | ENSP00000311134 |
| ENSP00000254336 | ENSP00000337289 |
| ENSP00000254336 | ENSP00000362807 |
| ENSP00000254336 | ENSP00000381031 |
| ENSP00000254336 | ENSP00000397394 |
| ENSP00000254337 | ENSP00000301764 |
| ENSP00000254351 | ENSP00000260130 |
| ENSP00000254351 | ENSP00000307046 |
| ENSP00000254351 | ENSP00000341170 |
| ENSP00000254351 | ENSP00000344468 |
| ENSP00000254351 | ENSP00000367408 |
| ENSP00000254442 | ENSP00000256398 |
| ENSP00000254442 | ENSP00000264158 |
| ENSP00000254442 | ENSP00000264515 |
| ENSP00000254442 | ENSP00000264951 |
| ENSP00000254442 | ENSP00000266126 |
| ENSP00000254442 | ENSP00000282007 |
| ENSP00000254442 | ENSP00000290541 |
| ENSP00000254442 | ENSP00000310596 |
| ENSP00000254442 | ENSP00000320949 |
| ENSP00000254442 | ENSP00000331817 |
| ENSP00000254442 | ENSP00000340896 |
| ENSP00000254442 | ENSP00000356811 |
| ENSP00000254442 | ENSP00000360310 |
| ENSP00000254442 | ENSP00000361433 |
| ENSP00000254521 | ENSP00000256319 |
| ENSP00000254521 | ENSP00000260433 |
| ENSP00000254521 | ENSP00000261507 |
| ENSP00000254521 | ENSP00000264027 |
| ENSP00000254521 | ENSP00000265896 |
| ENSP00000254521 | ENSP00000269703 |
| ENSP00000254521 | ENSP00000272163 |
| ENSP00000254521 | ENSP00000277010 |
| ENSP00000254521 | ENSP00000285949 |
| ENSP00000254521 | ENSP00000304802 |
| ENSP00000254521 | ENSP00000310649 |
| ENSP00000254521 | ENSP00000310721 |
| ENSP00000254521 | ENSP00000320604 |
| ENSP00000254521 | ENSP00000325425 |
| ENSP00000254521 | ENSP00000330812 |
| ENSP00000254521 | ENSP00000341662 |
| ENSP00000254521 | ENSP00000348380 |
| ENSP00000254521 | ENSP00000348762 |
| ENSP00000254521 | ENSP00000356737 |
| ENSP00000254521 | ENSP00000357650 |
| ENSP00000254521 | ENSP00000360918 |

|                 |                 |
|-----------------|-----------------|
| ENSP00000254521 | ENSP00000380184 |
| ENSP00000254521 | ENSP00000383901 |
| ENSP00000254579 | ENSP00000260731 |
| ENSP00000254579 | ENSP00000295951 |
| ENSP00000254579 | ENSP00000296509 |
| ENSP00000254579 | ENSP00000300249 |
| ENSP00000254579 | ENSP00000360310 |
| ENSP00000254579 | ENSP00000377793 |
| ENSP00000254605 | ENSP00000256319 |
| ENSP00000254605 | ENSP00000260129 |
| ENSP00000254605 | ENSP00000262315 |
| ENSP00000254605 | ENSP00000264670 |
| ENSP00000254605 | ENSP00000270625 |
| ENSP00000254605 | ENSP00000290158 |
| ENSP00000254605 | ENSP00000298746 |
| ENSP00000254605 | ENSP00000309433 |
| ENSP00000254605 | ENSP00000310042 |
| ENSP00000254605 | ENSP00000312981 |
| ENSP00000254605 | ENSP00000329466 |
| ENSP00000254605 | ENSP00000333934 |
| ENSP00000254605 | ENSP00000343701 |
| ENSP00000254605 | ENSP00000346120 |
| ENSP00000254605 | ENSP00000347087 |
| ENSP00000254605 | ENSP00000348107 |
| ENSP00000254605 | ENSP00000352678 |
| ENSP00000254605 | ENSP00000352738 |
| ENSP00000254605 | ENSP00000356548 |
| ENSP00000254605 | ENSP00000356989 |
| ENSP00000254605 | ENSP00000358563 |
| ENSP00000254605 | ENSP00000361433 |
| ENSP00000254605 | ENSP00000362105 |
| ENSP00000254605 | ENSP00000364289 |
| ENSP00000254605 | ENSP00000365811 |
| ENSP00000254605 | ENSP00000365877 |
| ENSP00000254605 | ENSP00000366135 |
| ENSP00000254605 | ENSP00000369042 |
| ENSP00000254605 | ENSP00000370589 |
| ENSP00000254605 | ENSP00000374390 |
| ENSP00000254605 | ENSP00000379607 |
| ENSP00000254605 | ENSP00000379888 |
| ENSP00000254605 | ENSP00000380982 |
| ENSP00000254605 | ENSP00000419740 |
| ENSP00000254616 | ENSP00000257245 |
| ENSP00000254616 | ENSP00000295767 |
| ENSP00000254616 | ENSP00000320236 |
| ENSP00000254616 | ENSP00000364699 |



|                 |                 |
|-----------------|-----------------|
| ENSP00000254624 | ENSP00000261211 |
| ENSP00000254624 | ENSP00000397435 |
| ENSP00000254630 | ENSP00000301585 |
| ENSP00000254630 | ENSP00000329466 |
| ENSP00000254630 | ENSP00000331201 |
| ENSP00000254630 | ENSP00000336790 |
| ENSP00000254630 | ENSP00000362208 |
| ENSP00000254630 | ENSP00000373570 |
| ENSP00000254654 | ENSP00000262039 |
| ENSP00000254654 | ENSP00000299424 |
| ENSP00000254654 | ENSP00000301364 |
| ENSP00000254654 | ENSP00000331201 |
| ENSP00000254654 | ENSP00000343190 |
| ENSP00000254654 | ENSP00000349205 |
| ENSP00000254654 | ENSP00000356530 |
| ENSP00000254654 | ENSP00000360268 |
| ENSP00000254654 | ENSP00000372023 |
| ENSP00000254654 | ENSP00000375986 |
| ENSP00000254654 | ENSP00000378306 |
| ENSP00000254654 | ENSP00000401445 |
| ENSP00000254661 | ENSP00000331746 |
| ENSP00000254691 | ENSP00000269280 |
| ENSP00000254695 | ENSP00000264335 |
| ENSP00000254695 | ENSP00000313059 |
| ENSP00000254719 | ENSP00000255078 |
| ENSP00000254719 | ENSP00000255465 |
| ENSP00000254719 | ENSP00000256442 |
| ENSP00000254719 | ENSP00000256996 |
| ENSP00000254719 | ENSP00000258774 |
| ENSP00000254719 | ENSP00000259008 |
| ENSP00000254719 | ENSP00000259569 |
| ENSP00000254719 | ENSP00000260810 |
| ENSP00000254719 | ENSP00000260956 |
| ENSP00000254719 | ENSP00000261424 |
| ENSP00000254719 | ENSP00000261881 |
| ENSP00000254719 | ENSP00000262315 |
| ENSP00000254719 | ENSP00000262460 |
| ENSP00000254719 | ENSP00000262518 |
| ENSP00000254719 | ENSP00000262794 |
| ENSP00000254719 | ENSP00000262803 |
| ENSP00000254719 | ENSP00000263073 |
| ENSP00000254719 | ENSP00000263187 |
| ENSP00000254719 | ENSP00000263201 |
| ENSP00000254719 | ENSP00000263208 |
| ENSP00000254719 | ENSP00000263795 |
| ENSP00000254719 | ENSP00000263857 |

|                 |                 |
|-----------------|-----------------|
| ENSP00000254719 | ENSP00000264335 |
| ENSP00000254719 | ENSP00000264926 |
| ENSP00000254719 | ENSP00000265056 |
| ENSP00000254719 | ENSP00000265073 |
| ENSP00000254719 | ENSP00000265081 |
| ENSP00000254719 | ENSP00000265304 |
| ENSP00000254719 | ENSP00000265351 |
| ENSP00000254719 | ENSP00000265465 |
| ENSP00000254719 | ENSP00000265728 |
| ENSP00000254719 | ENSP00000265963 |
| ENSP00000254719 | ENSP00000267064 |
| ENSP00000254719 | ENSP00000267430 |
| ENSP00000254719 | ENSP00000274311 |
| ENSP00000254719 | ENSP00000276533 |
| ENSP00000254719 | ENSP00000278412 |
| ENSP00000254719 | ENSP00000278616 |
| ENSP00000254719 | ENSP00000281708 |
| ENSP00000254719 | ENSP00000286428 |
| ENSP00000254719 | ENSP00000287598 |
| ENSP00000254719 | ENSP00000290158 |
| ENSP00000254719 | ENSP00000296137 |
| ENSP00000254719 | ENSP00000296273 |
| ENSP00000254719 | ENSP00000296509 |
| ENSP00000254719 | ENSP00000297185 |
| ENSP00000254719 | ENSP00000298139 |
| ENSP00000254719 | ENSP00000298532 |
| ENSP00000254719 | ENSP00000299206 |
| ENSP00000254719 | ENSP00000300648 |
| ENSP00000254719 | ENSP00000301280 |
| ENSP00000254719 | ENSP00000302530 |
| ENSP00000254719 | ENSP00000307004 |
| ENSP00000254719 | ENSP00000309572 |
| ENSP00000254719 | ENSP00000310520 |
| ENSP00000254719 | ENSP00000311873 |
| ENSP00000254719 | ENSP00000312735 |
| ENSP00000254719 | ENSP00000313171 |
| ENSP00000254719 | ENSP00000313350 |
| ENSP00000254719 | ENSP00000313420 |
| ENSP00000254719 | ENSP00000314949 |
| ENSP00000254719 | ENSP00000314971 |
| ENSP00000254719 | ENSP00000317039 |
| ENSP00000254719 | ENSP00000318822 |
| ENSP00000254719 | ENSP00000318977 |
| ENSP00000254719 | ENSP00000321636 |
| ENSP00000254719 | ENSP00000322419 |
| ENSP00000254719 | ENSP00000322570 |

|                 |                 |
|-----------------|-----------------|
| ENSP00000254719 | ENSP00000323099 |
| ENSP00000254719 | ENSP00000323439 |
| ENSP00000254719 | ENSP00000323663 |
| ENSP00000254719 | ENSP00000324124 |
| ENSP00000254719 | ENSP00000325863 |
| ENSP00000254719 | ENSP00000326819 |
| ENSP00000254719 | ENSP00000329002 |
| ENSP00000254719 | ENSP00000331111 |
| ENSP00000254719 | ENSP00000332171 |
| ENSP00000254719 | ENSP00000336606 |
| ENSP00000254719 | ENSP00000336712 |
| ENSP00000254719 | ENSP00000336868 |
| ENSP00000254719 | ENSP00000337088 |
| ENSP00000254719 | ENSP00000338990 |
| ENSP00000254719 | ENSP00000339826 |
| ENSP00000254719 | ENSP00000340766 |
| ENSP00000254719 | ENSP00000340879 |
| ENSP00000254719 | ENSP00000341243 |
| ENSP00000254719 | ENSP00000341382 |
| ENSP00000254719 | ENSP00000343392 |
| ENSP00000254719 | ENSP00000343741 |
| ENSP00000254719 | ENSP00000346453 |
| ENSP00000254719 | ENSP00000347168 |
| ENSP00000254719 | ENSP00000347232 |
| ENSP00000254719 | ENSP00000347978 |
| ENSP00000254719 | ENSP00000348089 |
| ENSP00000254719 | ENSP00000350283 |
| ENSP00000254719 | ENSP00000350491 |
| ENSP00000254719 | ENSP00000350767 |
| ENSP00000254719 | ENSP00000351284 |
| ENSP00000254719 | ENSP00000351524 |
| ENSP00000254719 | ENSP00000352257 |
| ENSP00000254719 | ENSP00000354361 |
| ENSP00000254719 | ENSP00000354720 |
| ENSP00000254719 | ENSP00000354957 |
| ENSP00000254719 | ENSP00000355205 |
| ENSP00000254719 | ENSP00000355261 |
| ENSP00000254719 | ENSP00000357283 |
| ENSP00000254719 | ENSP00000360532 |
| ENSP00000254719 | ENSP00000360817 |
| ENSP00000254719 | ENSP00000361465 |
| ENSP00000254719 | ENSP00000362413 |
| ENSP00000254719 | ENSP00000363021 |
| ENSP00000254719 | ENSP00000364270 |
| ENSP00000254719 | ENSP00000364320 |
| ENSP00000254719 | ENSP00000366974 |

|                 |                 |
|-----------------|-----------------|
| ENSP00000254719 | ENSP00000367029 |
| ENSP00000254719 | ENSP00000367034 |
| ENSP00000254719 | ENSP00000367910 |
| ENSP00000254719 | ENSP00000368349 |
| ENSP00000254719 | ENSP00000368438 |
| ENSP00000254719 | ENSP00000368881 |
| ENSP00000254719 | ENSP00000369335 |
| ENSP00000254719 | ENSP00000369411 |
| ENSP00000254719 | ENSP00000369497 |
| ENSP00000254719 | ENSP00000370150 |
| ENSP00000254719 | ENSP00000370151 |
| ENSP00000254719 | ENSP00000371475 |
| ENSP00000254719 | ENSP00000372023 |
| ENSP00000254719 | ENSP00000373952 |
| ENSP00000254719 | ENSP00000374213 |
| ENSP00000254719 | ENSP00000375863 |
| ENSP00000254719 | ENSP00000378295 |
| ENSP00000254719 | ENSP00000379607 |
| ENSP00000254719 | ENSP00000379865 |
| ENSP00000254719 | ENSP00000380460 |
| ENSP00000254719 | ENSP00000380921 |
| ENSP00000254719 | ENSP00000383503 |
| ENSP00000254719 | ENSP00000396704 |
| ENSP00000254719 | ENSP00000397636 |
| ENSP00000254719 | ENSP00000403852 |
| ENSP00000254719 | ENSP00000405636 |
| ENSP00000254719 | ENSP00000410530 |
| ENSP00000254719 | ENSP00000410954 |
| ENSP00000254719 | ENSP00000414110 |
| ENSP00000254719 | ENSP00000416599 |
| ENSP00000254719 | ENSP00000420588 |
| ENSP00000254730 | ENSP00000254942 |
| ENSP00000254730 | ENSP00000261531 |
| ENSP00000254730 | ENSP00000278572 |
| ENSP00000254730 | ENSP00000302896 |
| ENSP00000254730 | ENSP00000326981 |
| ENSP00000254730 | ENSP00000341082 |
| ENSP00000254759 | ENSP00000262030 |
| ENSP00000254759 | ENSP00000265896 |
| ENSP00000254759 | ENSP00000267430 |
| ENSP00000254759 | ENSP00000277010 |
| ENSP00000254759 | ENSP00000300452 |
| ENSP00000254759 | ENSP00000307853 |
| ENSP00000254759 | ENSP00000310520 |
| ENSP00000254759 | ENSP00000310547 |
| ENSP00000254759 | ENSP00000322316 |

|                 |                 |
|-----------------|-----------------|
| ENSP00000254759 | ENSP00000333946 |
| ENSP00000254759 | ENSP00000353698 |
| ENSP00000254759 | ENSP00000355517 |
| ENSP00000254759 | ENSP00000355739 |
| ENSP00000254759 | ENSP00000360183 |
| ENSP00000254770 | ENSP00000254942 |
| ENSP00000254770 | ENSP00000300086 |
| ENSP00000254799 | ENSP00000301585 |
| ENSP00000254799 | ENSP00000336712 |
| ENSP00000254799 | ENSP00000379607 |
| ENSP00000254803 | ENSP00000254846 |
| ENSP00000254803 | ENSP00000261708 |
| ENSP00000254803 | ENSP00000306983 |
| ENSP00000254803 | ENSP00000311513 |
| ENSP00000254803 | ENSP00000324122 |
| ENSP00000254803 | ENSP00000327179 |
| ENSP00000254803 | ENSP00000328854 |
| ENSP00000254803 | ENSP00000338703 |
| ENSP00000254803 | ENSP00000341280 |
| ENSP00000254803 | ENSP00000355629 |
| ENSP00000254803 | ENSP00000356903 |
| ENSP00000254803 | ENSP00000363313 |
| ENSP00000254803 | ENSP00000369695 |
| ENSP00000254803 | ENSP00000370589 |
| ENSP00000254803 | ENSP00000382688 |
| ENSP00000254803 | ENSP00000402338 |
| ENSP00000254803 | ENSP00000415151 |
| ENSP00000254816 | ENSP00000254942 |
| ENSP00000254816 | ENSP00000302120 |
| ENSP00000254816 | ENSP00000360116 |
| ENSP00000254846 | ENSP00000262265 |
| ENSP00000254846 | ENSP00000262519 |
| ENSP00000254846 | ENSP00000264515 |
| ENSP00000254846 | ENSP00000267064 |
| ENSP00000254846 | ENSP00000267197 |
| ENSP00000254846 | ENSP00000280350 |
| ENSP00000254846 | ENSP00000298292 |
| ENSP00000254846 | ENSP00000312697 |
| ENSP00000254846 | ENSP00000341551 |
| ENSP00000254846 | ENSP00000347168 |
| ENSP00000254846 | ENSP00000350767 |
| ENSP00000254846 | ENSP00000357887 |
| ENSP00000254846 | ENSP00000365891 |
| ENSP00000254846 | ENSP00000366974 |
| ENSP00000254846 | ENSP00000367034 |
| ENSP00000254846 | ENSP00000371546 |

|                 |                 |
|-----------------|-----------------|
| ENSP00000254846 | ENSP00000373340 |
| ENSP00000254846 | ENSP00000386759 |
| ENSP00000254878 | ENSP00000300107 |
| ENSP00000254878 | ENSP00000308339 |
| ENSP00000254878 | ENSP00000310551 |
| ENSP00000254878 | ENSP00000339245 |
| ENSP00000254878 | ENSP00000348554 |
| ENSP00000254878 | ENSP00000354876 |
| ENSP00000254878 | ENSP00000364912 |
| ENSP00000254878 | ENSP00000368698 |
| ENSP00000254878 | ENSP00000371846 |
| ENSP00000254878 | ENSP00000375986 |
| ENSP00000254878 | ENSP00000377865 |
| ENSP00000254878 | ENSP00000387262 |
| ENSP00000254878 | ENSP00000417281 |
| ENSP00000254900 | ENSP00000256398 |
| ENSP00000254900 | ENSP00000256897 |
| ENSP00000254900 | ENSP00000261531 |
| ENSP00000254900 | ENSP00000261819 |
| ENSP00000254900 | ENSP00000263620 |
| ENSP00000254900 | ENSP00000263974 |
| ENSP00000254900 | ENSP00000264183 |
| ENSP00000254900 | ENSP00000264193 |
| ENSP00000254900 | ENSP00000264731 |
| ENSP00000254900 | ENSP00000265990 |
| ENSP00000254900 | ENSP00000269127 |
| ENSP00000254900 | ENSP00000276072 |
| ENSP00000254900 | ENSP00000278412 |
| ENSP00000254900 | ENSP00000279873 |
| ENSP00000254900 | ENSP00000283882 |
| ENSP00000254900 | ENSP00000287820 |
| ENSP00000254900 | ENSP00000299424 |
| ENSP00000254900 | ENSP00000303315 |
| ENSP00000254900 | ENSP00000306983 |
| ENSP00000254900 | ENSP00000307208 |
| ENSP00000254900 | ENSP00000312697 |
| ENSP00000254900 | ENSP00000316114 |
| ENSP00000254900 | ENSP00000319169 |
| ENSP00000254900 | ENSP00000320566 |
| ENSP00000254900 | ENSP00000322579 |
| ENSP00000254900 | ENSP00000323720 |
| ENSP00000254900 | ENSP00000329933 |
| ENSP00000254900 | ENSP00000331310 |
| ENSP00000254900 | ENSP00000334061 |
| ENSP00000254900 | ENSP00000335044 |
| ENSP00000254900 | ENSP00000343741 |

|                 |                 |
|-----------------|-----------------|
| ENSP00000254900 | ENSP00000347602 |
| ENSP00000254900 | ENSP00000347733 |
| ENSP00000254900 | ENSP00000349213 |
| ENSP00000254900 | ENSP00000350078 |
| ENSP00000254900 | ENSP00000350967 |
| ENSP00000254900 | ENSP00000351490 |
| ENSP00000254900 | ENSP00000353622 |
| ENSP00000254900 | ENSP00000354633 |
| ENSP00000254900 | ENSP00000354673 |
| ENSP00000254900 | ENSP00000355205 |
| ENSP00000254900 | ENSP00000356530 |
| ENSP00000254900 | ENSP00000357887 |
| ENSP00000254900 | ENSP00000359290 |
| ENSP00000254900 | ENSP00000359518 |
| ENSP00000254900 | ENSP00000360532 |
| ENSP00000254900 | ENSP00000360621 |
| ENSP00000254900 | ENSP00000360676 |
| ENSP00000254900 | ENSP00000361998 |
| ENSP00000254900 | ENSP00000362068 |
| ENSP00000254900 | ENSP00000363779 |
| ENSP00000254900 | ENSP00000369695 |
| ENSP00000254900 | ENSP00000372023 |
| ENSP00000254900 | ENSP00000373340 |
| ENSP00000254900 | ENSP00000374213 |
| ENSP00000254900 | ENSP00000377747 |
| ENSP00000254900 | ENSP00000381657 |
| ENSP00000254900 | ENSP00000392028 |
| ENSP00000254900 | ENSP00000401445 |
| ENSP00000254900 | ENSP00000402084 |
| ENSP00000254908 | ENSP00000258648 |
| ENSP00000254908 | ENSP00000259667 |
| ENSP00000254908 | ENSP00000261531 |
| ENSP00000254908 | ENSP00000266126 |
| ENSP00000254908 | ENSP00000268058 |
| ENSP00000254908 | ENSP00000282388 |
| ENSP00000254908 | ENSP00000282892 |
| ENSP00000254908 | ENSP00000283875 |
| ENSP00000254908 | ENSP00000284957 |
| ENSP00000254908 | ENSP00000286317 |
| ENSP00000254908 | ENSP00000297347 |
| ENSP00000254908 | ENSP00000301280 |
| ENSP00000254908 | ENSP00000304292 |
| ENSP00000254908 | ENSP00000305502 |
| ENSP00000254908 | ENSP00000329029 |
| ENSP00000254908 | ENSP00000340836 |
| ENSP00000254908 | ENSP00000348107 |

|                 |                 |
|-----------------|-----------------|
| ENSP00000254908 | ENSP00000357448 |
| ENSP00000254908 | ENSP00000359837 |
| ENSP00000254908 | ENSP00000360532 |
| ENSP00000254908 | ENSP00000377665 |
| ENSP00000254908 | ENSP00000394869 |
| ENSP00000254928 | ENSP00000301585 |
| ENSP00000254928 | ENSP00000302896 |
| ENSP00000254928 | ENSP00000326981 |
| ENSP00000254928 | ENSP00000353826 |
| ENSP00000254928 | ENSP00000355471 |
| ENSP00000254928 | ENSP00000356134 |
| ENSP00000254928 | ENSP00000360286 |
| ENSP00000254928 | ENSP00000360532 |
| ENSP00000254928 | ENSP00000362576 |
| ENSP00000254940 | ENSP00000260956 |
| ENSP00000254940 | ENSP00000261015 |
| ENSP00000254940 | ENSP00000263512 |
| ENSP00000254940 | ENSP00000264230 |
| ENSP00000254940 | ENSP00000264670 |
| ENSP00000254940 | ENSP00000264995 |
| ENSP00000254940 | ENSP00000265245 |
| ENSP00000254940 | ENSP00000268616 |
| ENSP00000254940 | ENSP00000268661 |
| ENSP00000254940 | ENSP00000269499 |
| ENSP00000254940 | ENSP00000273861 |
| ENSP00000254940 | ENSP00000274606 |
| ENSP00000254940 | ENSP00000278856 |
| ENSP00000254940 | ENSP00000296411 |
| ENSP00000254940 | ENSP00000296802 |
| ENSP00000254940 | ENSP00000302886 |
| ENSP00000254940 | ENSP00000305702 |
| ENSP00000254940 | ENSP00000314311 |
| ENSP00000254940 | ENSP00000314348 |
| ENSP00000254940 | ENSP00000317232 |
| ENSP00000254940 | ENSP00000317992 |
| ENSP00000254940 | ENSP00000322396 |
| ENSP00000254940 | ENSP00000323858 |
| ENSP00000254940 | ENSP00000325312 |
| ENSP00000254940 | ENSP00000328690 |
| ENSP00000254940 | ENSP00000332340 |
| ENSP00000254940 | ENSP00000334594 |
| ENSP00000254940 | ENSP00000337839 |
| ENSP00000254940 | ENSP00000338573 |
| ENSP00000254940 | ENSP00000338862 |
| ENSP00000254940 | ENSP00000339145 |
| ENSP00000254940 | ENSP00000339795 |



|                 |                 |
|-----------------|-----------------|
| ENSP00000254940 | ENSP00000345156 |
| ENSP00000254940 | ENSP00000346120 |
| ENSP00000254940 | ENSP00000346236 |
| ENSP00000254940 | ENSP00000346725 |
| ENSP00000254940 | ENSP00000352021 |
| ENSP00000254940 | ENSP00000352308 |
| ENSP00000254940 | ENSP00000352738 |
| ENSP00000254940 | ENSP00000354040 |
| ENSP00000254940 | ENSP00000358716 |
| ENSP00000254940 | ENSP00000359305 |
| ENSP00000254940 | ENSP00000359345 |
| ENSP00000254940 | ENSP00000359688 |
| ENSP00000254940 | ENSP00000360412 |
| ENSP00000254940 | ENSP00000360828 |
| ENSP00000254940 | ENSP00000361076 |
| ENSP00000254940 | ENSP00000361232 |
| ENSP00000254940 | ENSP00000362153 |
| ENSP00000254940 | ENSP00000363018 |
| ENSP00000254940 | ENSP00000363559 |
| ENSP00000254940 | ENSP00000364320 |
| ENSP00000254940 | ENSP00000365806 |
| ENSP00000254940 | ENSP00000366519 |
| ENSP00000254940 | ENSP00000368887 |
| ENSP00000254940 | ENSP00000370616 |
| ENSP00000254940 | ENSP00000371201 |
| ENSP00000254940 | ENSP00000372199 |
| ENSP00000254940 | ENSP00000373090 |
| ENSP00000254940 | ENSP00000377865 |
| ENSP00000254940 | ENSP00000379607 |
| ENSP00000254940 | ENSP00000379888 |
| ENSP00000254940 | ENSP00000380495 |
| ENSP00000254940 | ENSP00000380982 |
| ENSP00000254940 | ENSP00000382392 |
| ENSP00000254940 | ENSP00000388464 |
| ENSP00000254940 | ENSP00000389103 |
| ENSP00000254940 | ENSP00000394290 |
| ENSP00000254940 | ENSP00000401177 |
| ENSP00000254940 | ENSP00000402338 |
| ENSP00000254940 | ENSP00000403576 |
| ENSP00000254940 | ENSP00000409074 |
| ENSP00000254940 | ENSP00000409367 |
| ENSP00000254940 | ENSP00000411162 |
| ENSP00000254940 | ENSP00000413152 |
| ENSP00000254940 | ENSP00000419740 |
| ENSP00000254942 | ENSP00000257789 |
| ENSP00000254942 | ENSP00000260283 |

|                 |                 |
|-----------------|-----------------|
| ENSP00000254942 | ENSP00000261173 |
| ENSP00000254942 | ENSP00000262238 |
| ENSP00000254942 | ENSP00000263274 |
| ENSP00000254942 | ENSP00000264157 |
| ENSP00000254942 | ENSP00000265175 |
| ENSP00000254942 | ENSP00000265433 |
| ENSP00000254942 | ENSP00000267415 |
| ENSP00000254942 | ENSP00000268058 |
| ENSP00000254942 | ENSP00000269932 |
| ENSP00000254942 | ENSP00000271628 |
| ENSP00000254942 | ENSP00000272444 |
| ENSP00000254942 | ENSP00000276603 |
| ENSP00000254942 | ENSP00000278616 |
| ENSP00000254942 | ENSP00000282007 |
| ENSP00000254942 | ENSP00000290158 |
| ENSP00000254942 | ENSP00000291688 |
| ENSP00000254942 | ENSP00000294008 |
| ENSP00000254942 | ENSP00000294053 |
| ENSP00000254942 | ENSP00000294740 |
| ENSP00000254942 | ENSP00000297591 |
| ENSP00000254942 | ENSP00000298139 |
| ENSP00000254942 | ENSP00000299427 |
| ENSP00000254942 | ENSP00000299767 |
| ENSP00000254942 | ENSP00000300086 |
| ENSP00000254942 | ENSP00000301011 |
| ENSP00000254942 | ENSP00000301740 |
| ENSP00000254942 | ENSP00000301764 |
| ENSP00000254942 | ENSP00000302647 |
| ENSP00000254942 | ENSP00000303042 |
| ENSP00000254942 | ENSP00000305631 |
| ENSP00000254942 | ENSP00000307853 |
| ENSP00000254942 | ENSP00000307863 |
| ENSP00000254942 | ENSP00000307889 |
| ENSP00000254942 | ENSP00000311135 |
| ENSP00000254942 | ENSP00000311579 |
| ENSP00000254942 | ENSP00000311816 |
| ENSP00000254942 | ENSP00000314311 |
| ENSP00000254942 | ENSP00000318195 |
| ENSP00000254942 | ENSP00000318262 |
| ENSP00000254942 | ENSP00000319169 |
| ENSP00000254942 | ENSP00000319240 |
| ENSP00000254942 | ENSP00000319501 |
| ENSP00000254942 | ENSP00000320503 |
| ENSP00000254942 | ENSP00000321259 |
| ENSP00000254942 | ENSP00000321636 |
| ENSP00000254942 | ENSP00000323435 |

|                 |                 |
|-----------------|-----------------|
| ENSP00000254942 | ENSP00000325677 |
| ENSP00000254942 | ENSP00000325690 |
| ENSP00000254942 | ENSP00000325863 |
| ENSP00000254942 | ENSP00000328187 |
| ENSP00000254942 | ENSP00000328671 |
| ENSP00000254942 | ENSP00000328690 |
| ENSP00000254942 | ENSP00000328773 |
| ENSP00000254942 | ENSP00000328992 |
| ENSP00000254942 | ENSP00000329360 |
| ENSP00000254942 | ENSP00000332013 |
| ENSP00000254942 | ENSP00000332325 |
| ENSP00000254942 | ENSP00000334040 |
| ENSP00000254942 | ENSP00000334836 |
| ENSP00000254942 | ENSP00000340434 |
| ENSP00000254942 | ENSP00000340466 |
| ENSP00000254942 | ENSP00000342502 |
| ENSP00000254942 | ENSP00000343023 |
| ENSP00000254942 | ENSP00000343313 |
| ENSP00000254942 | ENSP00000343657 |
| ENSP00000254942 | ENSP00000344547 |
| ENSP00000254942 | ENSP00000345917 |
| ENSP00000254942 | ENSP00000346065 |
| ENSP00000254942 | ENSP00000346120 |
| ENSP00000254942 | ENSP00000346634 |
| ENSP00000254942 | ENSP00000347232 |
| ENSP00000254942 | ENSP00000347592 |
| ENSP00000254942 | ENSP00000349393 |
| ENSP00000254942 | ENSP00000350249 |
| ENSP00000254942 | ENSP00000350283 |
| ENSP00000254942 | ENSP00000351697 |
| ENSP00000254942 | ENSP00000352257 |
| ENSP00000254942 | ENSP00000352738 |
| ENSP00000254942 | ENSP00000354620 |
| ENSP00000254942 | ENSP00000354720 |
| ENSP00000254942 | ENSP00000354826 |
| ENSP00000254942 | ENSP00000355086 |
| ENSP00000254942 | ENSP00000355922 |
| ENSP00000254942 | ENSP00000357711 |
| ENSP00000254942 | ENSP00000358081 |
| ENSP00000254942 | ENSP00000358563 |
| ENSP00000254942 | ENSP00000358576 |
| ENSP00000254942 | ENSP00000359988 |
| ENSP00000254942 | ENSP00000360497 |
| ENSP00000254942 | ENSP00000360621 |
| ENSP00000254942 | ENSP00000361202 |
| ENSP00000254942 | ENSP00000361894 |

|                 |                 |
|-----------------|-----------------|
| ENSP00000254942 | ENSP00000361949 |
| ENSP00000254942 | ENSP00000362170 |
| ENSP00000254942 | ENSP00000362532 |
| ENSP00000254942 | ENSP00000367406 |
| ENSP00000254942 | ENSP00000368646 |
| ENSP00000254942 | ENSP00000369757 |
| ENSP00000254942 | ENSP00000369887 |
| ENSP00000254942 | ENSP00000370125 |
| ENSP00000254942 | ENSP00000370377 |
| ENSP00000254942 | ENSP00000371475 |
| ENSP00000254942 | ENSP00000376903 |
| ENSP00000254942 | ENSP00000377040 |
| ENSP00000254942 | ENSP00000377496 |
| ENSP00000254942 | ENSP00000379372 |
| ENSP00000254942 | ENSP00000379654 |
| ENSP00000254942 | ENSP00000379888 |
| ENSP00000254942 | ENSP00000384160 |
| ENSP00000254942 | ENSP00000392028 |
| ENSP00000254942 | ENSP00000394390 |
| ENSP00000254942 | ENSP00000395535 |
| ENSP00000254942 | ENSP00000396439 |
| ENSP00000254942 | ENSP00000400476 |
| ENSP00000254942 | ENSP00000406888 |
| ENSP00000254942 | ENSP00000417281 |
| ENSP00000254963 | ENSP00000361433 |
| ENSP00000255078 | ENSP00000268043 |
| ENSP00000255078 | ENSP00000286835 |
| ENSP00000255078 | ENSP00000307525 |
| ENSP00000255078 | ENSP00000325863 |
| ENSP00000255078 | ENSP00000331310 |
| ENSP00000255078 | ENSP00000347978 |
| ENSP00000255078 | ENSP00000356146 |
| ENSP00000255078 | ENSP00000363021 |
| ENSP00000255078 | ENSP00000369335 |
| ENSP00000255078 | ENSP00000370150 |
| ENSP00000255082 | ENSP00000263056 |
| ENSP00000255108 | ENSP00000263083 |
| ENSP00000255108 | ENSP00000268206 |
| ENSP00000255108 | ENSP00000296805 |
| ENSP00000255108 | ENSP00000297185 |
| ENSP00000255108 | ENSP00000321320 |
| ENSP00000255108 | ENSP00000334564 |
| ENSP00000255108 | ENSP00000348877 |
| ENSP00000255108 | ENSP00000361465 |
| ENSP00000255108 | ENSP00000419599 |
| ENSP00000255194 | ENSP00000256658 |

|                 |                 |
|-----------------|-----------------|
| ENSP00000255194 | ENSP00000258062 |
| ENSP00000255194 | ENSP00000259400 |
| ENSP00000255194 | ENSP00000261531 |
| ENSP00000255194 | ENSP00000264705 |
| ENSP00000255194 | ENSP00000269122 |
| ENSP00000255194 | ENSP00000280772 |
| ENSP00000255194 | ENSP00000286448 |
| ENSP00000255194 | ENSP00000287598 |
| ENSP00000255194 | ENSP00000294543 |
| ENSP00000255194 | ENSP00000302530 |
| ENSP00000255194 | ENSP00000303279 |
| ENSP00000255194 | ENSP00000305459 |
| ENSP00000255194 | ENSP00000309262 |
| ENSP00000255194 | ENSP00000319979 |
| ENSP00000255194 | ENSP00000337688 |
| ENSP00000255194 | ENSP00000343535 |
| ENSP00000255194 | ENSP00000344055 |
| ENSP00000255194 | ENSP00000347408 |
| ENSP00000255194 | ENSP00000350199 |
| ENSP00000255194 | ENSP00000364794 |
| ENSP00000255194 | ENSP00000365837 |
| ENSP00000255194 | ENSP00000377769 |
| ENSP00000255194 | ENSP00000415434 |
| ENSP00000255194 | ENSP00000418661 |
| ENSP00000255226 | ENSP00000357674 |
| ENSP00000255226 | ENSP00000417281 |
| ENSP00000255266 | ENSP00000348554 |
| ENSP00000255266 | ENSP00000351015 |
| ENSP00000255304 | ENSP00000270776 |
| ENSP00000255304 | ENSP00000291009 |
| ENSP00000255304 | ENSP00000296564 |
| ENSP00000255304 | ENSP00000339933 |
| ENSP00000255304 | ENSP00000343362 |
| ENSP00000255305 | ENSP00000336702 |
| ENSP00000255324 | ENSP00000269397 |
| ENSP00000255324 | ENSP00000294848 |
| ENSP00000255324 | ENSP00000346065 |
| ENSP00000255324 | ENSP00000349208 |
| ENSP00000255324 | ENSP00000356846 |
| ENSP00000255324 | ENSP00000357812 |
| ENSP00000255324 | ENSP00000360116 |
| ENSP00000255324 | ENSP00000360532 |
| ENSP00000255380 | ENSP00000355146 |
| ENSP00000255389 | ENSP00000261407 |
| ENSP00000255389 | ENSP00000262177 |
| ENSP00000255389 | ENSP00000263228 |

|                 |                 |
|-----------------|-----------------|
| ENSP00000255389 | ENSP00000263817 |
| ENSP00000255389 | ENSP00000264005 |
| ENSP00000255389 | ENSP00000265689 |
| ENSP00000255389 | ENSP00000266095 |
| ENSP00000255389 | ENSP00000267750 |
| ENSP00000255389 | ENSP00000287936 |
| ENSP00000255389 | ENSP00000302177 |
| ENSP00000255389 | ENSP00000305459 |
| ENSP00000255389 | ENSP00000306124 |
| ENSP00000255389 | ENSP00000310721 |
| ENSP00000255389 | ENSP00000314196 |
| ENSP00000255389 | ENSP00000327716 |
| ENSP00000255389 | ENSP00000331719 |
| ENSP00000255389 | ENSP00000333873 |
| ENSP00000255389 | ENSP00000349877 |
| ENSP00000255389 | ENSP00000349970 |
| ENSP00000255389 | ENSP00000350967 |
| ENSP00000255389 | ENSP00000354519 |
| ENSP00000255389 | ENSP00000359067 |
| ENSP00000255389 | ENSP00000359380 |
| ENSP00000255389 | ENSP00000359552 |
| ENSP00000255389 | ENSP00000361287 |
| ENSP00000255389 | ENSP00000368439 |
| ENSP00000255389 | ENSP00000401445 |
| ENSP00000255389 | ENSP00000402240 |
| ENSP00000255390 | ENSP00000261070 |
| ENSP00000255390 | ENSP00000299335 |
| ENSP00000255390 | ENSP00000351644 |
| ENSP00000255390 | ENSP00000354876 |
| ENSP00000255390 | ENSP00000355572 |
| ENSP00000255390 | ENSP00000356231 |
| ENSP00000255390 | ENSP00000357973 |
| ENSP00000255390 | ENSP00000359976 |
| ENSP00000255390 | ENSP00000387262 |
| ENSP00000255465 | ENSP00000256398 |
| ENSP00000255465 | ENSP00000256442 |
| ENSP00000255465 | ENSP00000256925 |
| ENSP00000255465 | ENSP00000257934 |
| ENSP00000255465 | ENSP00000260187 |
| ENSP00000255465 | ENSP00000262133 |
| ENSP00000255465 | ENSP00000262643 |
| ENSP00000255465 | ENSP00000263246 |
| ENSP00000255465 | ENSP00000264335 |
| ENSP00000255465 | ENSP00000265056 |
| ENSP00000255465 | ENSP00000265351 |
| ENSP00000255465 | ENSP00000267163 |

|                 |                 |
|-----------------|-----------------|
| ENSP00000255465 | ENSP00000268043 |
| ENSP00000255465 | ENSP00000269214 |
| ENSP00000255465 | ENSP00000274255 |
| ENSP00000255465 | ENSP00000276014 |
| ENSP00000255465 | ENSP00000278412 |
| ENSP00000255465 | ENSP00000278612 |
| ENSP00000255465 | ENSP00000278616 |
| ENSP00000255465 | ENSP00000287598 |
| ENSP00000255465 | ENSP00000292535 |
| ENSP00000255465 | ENSP00000296509 |
| ENSP00000255465 | ENSP00000298552 |
| ENSP00000255465 | ENSP00000301019 |
| ENSP00000255465 | ENSP00000301039 |
| ENSP00000255465 | ENSP00000302530 |
| ENSP00000255465 | ENSP00000304226 |
| ENSP00000255465 | ENSP00000306999 |
| ENSP00000255465 | ENSP00000309166 |
| ENSP00000255465 | ENSP00000309871 |
| ENSP00000255465 | ENSP00000310040 |
| ENSP00000255465 | ENSP00000311083 |
| ENSP00000255465 | ENSP00000313420 |
| ENSP00000255465 | ENSP00000313490 |
| ENSP00000255465 | ENSP00000321636 |
| ENSP00000255465 | ENSP00000322180 |
| ENSP00000255465 | ENSP00000325120 |
| ENSP00000255465 | ENSP00000326128 |
| ENSP00000255465 | ENSP00000329357 |
| ENSP00000255465 | ENSP00000330074 |
| ENSP00000255465 | ENSP00000335044 |
| ENSP00000255465 | ENSP00000340466 |
| ENSP00000255465 | ENSP00000341189 |
| ENSP00000255465 | ENSP00000343741 |
| ENSP00000255465 | ENSP00000344456 |
| ENSP00000255465 | ENSP00000346566 |
| ENSP00000255465 | ENSP00000347129 |
| ENSP00000255465 | ENSP00000347169 |
| ENSP00000255465 | ENSP00000348886 |
| ENSP00000255465 | ENSP00000350283 |
| ENSP00000255465 | ENSP00000350491 |
| ENSP00000255465 | ENSP00000352121 |
| ENSP00000255465 | ENSP00000352257 |
| ENSP00000255465 | ENSP00000353098 |
| ENSP00000255465 | ENSP00000353622 |
| ENSP00000255465 | ENSP00000355865 |
| ENSP00000255465 | ENSP00000356990 |
| ENSP00000255465 | ENSP00000360621 |

|                 |                 |
|-----------------|-----------------|
| ENSP00000255465 | ENSP00000362688 |
| ENSP00000255465 | ENSP00000363827 |
| ENSP00000255465 | ENSP00000377793 |
| ENSP00000255465 | ENSP00000378529 |
| ENSP00000255465 | ENSP00000379607 |
| ENSP00000255465 | ENSP00000382595 |
| ENSP00000255476 | ENSP00000281172 |
| ENSP00000255476 | ENSP00000290524 |
| ENSP00000255559 | ENSP00000309710 |
| ENSP00000255559 | ENSP00000362376 |
| ENSP00000255608 | ENSP00000294119 |
| ENSP00000255608 | ENSP00000304102 |
| ENSP00000255608 | ENSP00000335306 |
| ENSP00000255608 | ENSP00000338157 |
| ENSP00000255608 | ENSP00000341551 |
| ENSP00000255608 | ENSP00000350512 |
| ENSP00000255608 | ENSP00000354522 |
| ENSP00000255616 | ENSP00000300086 |
| ENSP00000255616 | ENSP00000340995 |
| ENSP00000255631 | ENSP00000288828 |
| ENSP00000255631 | ENSP00000297185 |
| ENSP00000255631 | ENSP00000323858 |
| ENSP00000255631 | ENSP00000337688 |
| ENSP00000255631 | ENSP00000347948 |
| ENSP00000255631 | ENSP00000349131 |
| ENSP00000255631 | ENSP00000356530 |
| ENSP00000255631 | ENSP00000357998 |
| ENSP00000255631 | ENSP00000365943 |
| ENSP00000255631 | ENSP00000386621 |
| ENSP00000255631 | ENSP00000401445 |
| ENSP00000255759 | ENSP00000327077 |
| ENSP00000255764 | ENSP00000256379 |
| ENSP00000255764 | ENSP00000258648 |
| ENSP00000255764 | ENSP00000261758 |
| ENSP00000255764 | ENSP00000263205 |
| ENSP00000255764 | ENSP00000263390 |
| ENSP00000255764 | ENSP00000264160 |
| ENSP00000255764 | ENSP00000265343 |
| ENSP00000255764 | ENSP00000265350 |
| ENSP00000255764 | ENSP00000265872 |
| ENSP00000255764 | ENSP00000267064 |
| ENSP00000255764 | ENSP00000268711 |
| ENSP00000255764 | ENSP00000272645 |
| ENSP00000255764 | ENSP00000281928 |
| ENSP00000255764 | ENSP00000282884 |
| ENSP00000255764 | ENSP00000282892 |



|                 |                 |
|-----------------|-----------------|
| ENSP00000255764 | ENSP00000286317 |
| ENSP00000255764 | ENSP00000290663 |
| ENSP00000255764 | ENSP00000292035 |
| ENSP00000255764 | ENSP00000293406 |
| ENSP00000255764 | ENSP00000293777 |
| ENSP00000255764 | ENSP00000296930 |
| ENSP00000255764 | ENSP00000297347 |
| ENSP00000255764 | ENSP00000299424 |
| ENSP00000255764 | ENSP00000300651 |
| ENSP00000255764 | ENSP00000301788 |
| ENSP00000255764 | ENSP00000306983 |
| ENSP00000255764 | ENSP00000307850 |
| ENSP00000255764 | ENSP00000312735 |
| ENSP00000255764 | ENSP00000314311 |
| ENSP00000255764 | ENSP00000314949 |
| ENSP00000255764 | ENSP00000317636 |
| ENSP00000255764 | ENSP00000323720 |
| ENSP00000255764 | ENSP00000324124 |
| ENSP00000255764 | ENSP00000325612 |
| ENSP00000255764 | ENSP00000326128 |
| ENSP00000255764 | ENSP00000326767 |
| ENSP00000255764 | ENSP00000334061 |
| ENSP00000255764 | ENSP00000335261 |
| ENSP00000255764 | ENSP00000337340 |
| ENSP00000255764 | ENSP00000342343 |
| ENSP00000255764 | ENSP00000342889 |
| ENSP00000255764 | ENSP00000348610 |
| ENSP00000255764 | ENSP00000357047 |
| ENSP00000255764 | ENSP00000357907 |
| ENSP00000255764 | ENSP00000359290 |
| ENSP00000255764 | ENSP00000360371 |
| ENSP00000255764 | ENSP00000362948 |
| ENSP00000255764 | ENSP00000363193 |
| ENSP00000255764 | ENSP00000369162 |
| ENSP00000255764 | ENSP00000369695 |
| ENSP00000255764 | ENSP00000381216 |
| ENSP00000255764 | ENSP00000384048 |
| ENSP00000255764 | ENSP00000391774 |
| ENSP00000255764 | ENSP00000392617 |
| ENSP00000255764 | ENSP00000396749 |
| ENSP00000255764 | ENSP00000403852 |
| ENSP00000255764 | ENSP00000418734 |
| ENSP00000256010 | ENSP00000256637 |
| ENSP00000256010 | ENSP00000358106 |
| ENSP00000256010 | ENSP00000370372 |
| ENSP00000256031 | ENSP00000261819 |

|                 |                 |
|-----------------|-----------------|
| ENSP00000256031 | ENSP00000281187 |
| ENSP00000256031 | ENSP00000290299 |
| ENSP00000256031 | ENSP00000299601 |
| ENSP00000256031 | ENSP00000318977 |
| ENSP00000256031 | ENSP00000327309 |
| ENSP00000256031 | ENSP00000337475 |
| ENSP00000256031 | ENSP00000355471 |
| ENSP00000256031 | ENSP00000356562 |
| ENSP00000256031 | ENSP00000356807 |
| ENSP00000256031 | ENSP00000357341 |
| ENSP00000256031 | ENSP00000362532 |
| ENSP00000256031 | ENSP00000384211 |
| ENSP00000256151 | ENSP00000315702 |
| ENSP00000256151 | ENSP00000322957 |
| ENSP00000256151 | ENSP00000346879 |
| ENSP00000256151 | ENSP00000364847 |
| ENSP00000256216 | ENSP00000262850 |
| ENSP00000256216 | ENSP00000263228 |
| ENSP00000256216 | ENSP00000280701 |
| ENSP00000256216 | ENSP00000287078 |
| ENSP00000256216 | ENSP00000290429 |
| ENSP00000256216 | ENSP00000304102 |
| ENSP00000256216 | ENSP00000306080 |
| ENSP00000256216 | ENSP00000310040 |
| ENSP00000256216 | ENSP00000319977 |
| ENSP00000256216 | ENSP00000342056 |
| ENSP00000256216 | ENSP00000348565 |
| ENSP00000256216 | ENSP00000349016 |
| ENSP00000256216 | ENSP00000350512 |
| ENSP00000256216 | ENSP00000354720 |
| ENSP00000256216 | ENSP00000358312 |
| ENSP00000256216 | ENSP00000360992 |
| ENSP00000256216 | ENSP00000363591 |
| ENSP00000256216 | ENSP00000364320 |
| ENSP00000256216 | ENSP00000366607 |
| ENSP00000256216 | ENSP00000367407 |
| ENSP00000256216 | ENSP00000387262 |
| ENSP00000256216 | ENSP00000397598 |
| ENSP00000256255 | ENSP00000290649 |
| ENSP00000256255 | ENSP00000337053 |
| ENSP00000256255 | ENSP00000366395 |
| ENSP00000256255 | ENSP00000379383 |
| ENSP00000256257 | ENSP00000272645 |
| ENSP00000256257 | ENSP00000297156 |
| ENSP00000256257 | ENSP00000312735 |
| ENSP00000256257 | ENSP00000324124 |

|                 |                 |
|-----------------|-----------------|
| ENSP00000256257 | ENSP00000403852 |
| ENSP00000256319 | ENSP00000261507 |
| ENSP00000256319 | ENSP00000264027 |
| ENSP00000256319 | ENSP00000265896 |
| ENSP00000256319 | ENSP00000272163 |
| ENSP00000256319 | ENSP00000277010 |
| ENSP00000256319 | ENSP00000285949 |
| ENSP00000256319 | ENSP00000295119 |
| ENSP00000256319 | ENSP00000301825 |
| ENSP00000256319 | ENSP00000310721 |
| ENSP00000256319 | ENSP00000320604 |
| ENSP00000256319 | ENSP00000325425 |
| ENSP00000256319 | ENSP00000330812 |
| ENSP00000256319 | ENSP00000333946 |
| ENSP00000256319 | ENSP00000341662 |
| ENSP00000256319 | ENSP00000348762 |
| ENSP00000256319 | ENSP00000351520 |
| ENSP00000256319 | ENSP00000355517 |
| ENSP00000256319 | ENSP00000360918 |
| ENSP00000256319 | ENSP00000365840 |
| ENSP00000256319 | ENSP00000367346 |
| ENSP00000256319 | ENSP00000379430 |
| ENSP00000256319 | ENSP00000387019 |
| ENSP00000256339 | ENSP00000270225 |
| ENSP00000256379 | ENSP00000258648 |
| ENSP00000256379 | ENSP00000258886 |
| ENSP00000256379 | ENSP00000263205 |
| ENSP00000256379 | ENSP00000263390 |
| ENSP00000256379 | ENSP00000263857 |
| ENSP00000256379 | ENSP00000264160 |
| ENSP00000256379 | ENSP00000264637 |
| ENSP00000256379 | ENSP00000265350 |
| ENSP00000256379 | ENSP00000265990 |
| ENSP00000256379 | ENSP00000267064 |
| ENSP00000256379 | ENSP00000268711 |
| ENSP00000256379 | ENSP00000280190 |
| ENSP00000256379 | ENSP00000281928 |
| ENSP00000256379 | ENSP00000282007 |
| ENSP00000256379 | ENSP00000282884 |
| ENSP00000256379 | ENSP00000282892 |
| ENSP00000256379 | ENSP00000286317 |
| ENSP00000256379 | ENSP00000290663 |
| ENSP00000256379 | ENSP00000292035 |
| ENSP00000256379 | ENSP00000293777 |
| ENSP00000256379 | ENSP00000296328 |
| ENSP00000256379 | ENSP00000297347 |

|                 |                 |
|-----------------|-----------------|
| ENSP00000256379 | ENSP00000298139 |
| ENSP00000256379 | ENSP00000299543 |
| ENSP00000256379 | ENSP00000300651 |
| ENSP00000256379 | ENSP00000302478 |
| ENSP00000256379 | ENSP00000312735 |
| ENSP00000256379 | ENSP00000312778 |
| ENSP00000256379 | ENSP00000314949 |
| ENSP00000256379 | ENSP00000316578 |
| ENSP00000256379 | ENSP00000322180 |
| ENSP00000256379 | ENSP00000323720 |
| ENSP00000256379 | ENSP00000325612 |
| ENSP00000256379 | ENSP00000326128 |
| ENSP00000256379 | ENSP00000326767 |
| ENSP00000256379 | ENSP00000337340 |
| ENSP00000256379 | ENSP00000342343 |
| ENSP00000256379 | ENSP00000347232 |
| ENSP00000256379 | ENSP00000348069 |
| ENSP00000256379 | ENSP00000348610 |
| ENSP00000256379 | ENSP00000355759 |
| ENSP00000256379 | ENSP00000357047 |
| ENSP00000256379 | ENSP00000357907 |
| ENSP00000256379 | ENSP00000360371 |
| ENSP00000256379 | ENSP00000361465 |
| ENSP00000256379 | ENSP00000362948 |
| ENSP00000256379 | ENSP00000363193 |
| ENSP00000256379 | ENSP00000369162 |
| ENSP00000256379 | ENSP00000381216 |
| ENSP00000256379 | ENSP00000384048 |
| ENSP00000256379 | ENSP00000391774 |
| ENSP00000256379 | ENSP00000392617 |
| ENSP00000256379 | ENSP00000418734 |
| ENSP00000256383 | ENSP00000259569 |
| ENSP00000256383 | ENSP00000260045 |
| ENSP00000256383 | ENSP00000261531 |
| ENSP00000256383 | ENSP00000261868 |
| ENSP00000256383 | ENSP00000263360 |
| ENSP00000256383 | ENSP00000263629 |
| ENSP00000256383 | ENSP00000263657 |
| ENSP00000256383 | ENSP00000263791 |
| ENSP00000256383 | ENSP00000264705 |
| ENSP00000256383 | ENSP00000266126 |
| ENSP00000256383 | ENSP00000272418 |
| ENSP00000256383 | ENSP00000273783 |
| ENSP00000256383 | ENSP00000274680 |
| ENSP00000256383 | ENSP00000280557 |
| ENSP00000256383 | ENSP00000284202 |

|                 |                 |
|-----------------|-----------------|
| ENSP00000256383 | ENSP00000289371 |
| ENSP00000256383 | ENSP00000296792 |
| ENSP00000256383 | ENSP00000298048 |
| ENSP00000256383 | ENSP00000307235 |
| ENSP00000256383 | ENSP00000310596 |
| ENSP00000256383 | ENSP00000316879 |
| ENSP00000256383 | ENSP00000320309 |
| ENSP00000256383 | ENSP00000323424 |
| ENSP00000256383 | ENSP00000331879 |
| ENSP00000256383 | ENSP00000336702 |
| ENSP00000256383 | ENSP00000339090 |
| ENSP00000256383 | ENSP00000340281 |
| ENSP00000256383 | ENSP00000341885 |
| ENSP00000256383 | ENSP00000344220 |
| ENSP00000256383 | ENSP00000345917 |
| ENSP00000256383 | ENSP00000346453 |
| ENSP00000256383 | ENSP00000349142 |
| ENSP00000256383 | ENSP00000353575 |
| ENSP00000256383 | ENSP00000354125 |
| ENSP00000256383 | ENSP00000355086 |
| ENSP00000256383 | ENSP00000355185 |
| ENSP00000256383 | ENSP00000356548 |
| ENSP00000256383 | ENSP00000358140 |
| ENSP00000256383 | ENSP00000361010 |
| ENSP00000256383 | ENSP00000362688 |
| ENSP00000256383 | ENSP00000363779 |
| ENSP00000256383 | ENSP00000364119 |
| ENSP00000256383 | ENSP00000368927 |
| ENSP00000256383 | ENSP00000370258 |
| ENSP00000256383 | ENSP00000379607 |
| ENSP00000256383 | ENSP00000394869 |
| ENSP00000256383 | ENSP00000417229 |
| ENSP00000256398 | ENSP00000256442 |
| ENSP00000256398 | ENSP00000256897 |
| ENSP00000256398 | ENSP00000259569 |
| ENSP00000256398 | ENSP00000259750 |
| ENSP00000256398 | ENSP00000260257 |
| ENSP00000256398 | ENSP00000260643 |
| ENSP00000256398 | ENSP00000261211 |
| ENSP00000256398 | ENSP00000261609 |
| ENSP00000256398 | ENSP00000261819 |
| ENSP00000256398 | ENSP00000262027 |
| ENSP00000256398 | ENSP00000262367 |
| ENSP00000256398 | ENSP00000262394 |
| ENSP00000256398 | ENSP00000262608 |
| ENSP00000256398 | ENSP00000262643 |

|                 |                 |
|-----------------|-----------------|
| ENSP00000256398 | ENSP00000262715 |
| ENSP00000256398 | ENSP00000263377 |
| ENSP00000256398 | ENSP00000264157 |
| ENSP00000256398 | ENSP00000264276 |
| ENSP00000256398 | ENSP00000264501 |
| ENSP00000256398 | ENSP00000264515 |
| ENSP00000256398 | ENSP00000270225 |
| ENSP00000256398 | ENSP00000274680 |
| ENSP00000256398 | ENSP00000276014 |
| ENSP00000256398 | ENSP00000276416 |
| ENSP00000256398 | ENSP00000278412 |
| ENSP00000256398 | ENSP00000282572 |
| ENSP00000256398 | ENSP00000282884 |
| ENSP00000256398 | ENSP00000285873 |
| ENSP00000256398 | ENSP00000286719 |
| ENSP00000256398 | ENSP00000287239 |
| ENSP00000256398 | ENSP00000291688 |
| ENSP00000256398 | ENSP00000293879 |
| ENSP00000256398 | ENSP00000295926 |
| ENSP00000256398 | ENSP00000296755 |
| ENSP00000256398 | ENSP00000296792 |
| ENSP00000256398 | ENSP00000296802 |
| ENSP00000256398 | ENSP00000298937 |
| ENSP00000256398 | ENSP00000299543 |
| ENSP00000256398 | ENSP00000300231 |
| ENSP00000256398 | ENSP00000300249 |
| ENSP00000256398 | ENSP00000305721 |
| ENSP00000256398 | ENSP00000307684 |
| ENSP00000256398 | ENSP00000311665 |
| ENSP00000256398 | ENSP00000313603 |
| ENSP00000256398 | ENSP00000314348 |
| ENSP00000256398 | ENSP00000314949 |
| ENSP00000256398 | ENSP00000318313 |
| ENSP00000256398 | ENSP00000320309 |
| ENSP00000256398 | ENSP00000320566 |
| ENSP00000256398 | ENSP00000321617 |
| ENSP00000256398 | ENSP00000322180 |
| ENSP00000256398 | ENSP00000323858 |
| ENSP00000256398 | ENSP00000325677 |
| ENSP00000256398 | ENSP00000327716 |
| ENSP00000256398 | ENSP00000328690 |
| ENSP00000256398 | ENSP00000331111 |
| ENSP00000256398 | ENSP00000332340 |
| ENSP00000256398 | ENSP00000334061 |
| ENSP00000256398 | ENSP00000334188 |
| ENSP00000256398 | ENSP00000336856 |

|                 |                 |
|-----------------|-----------------|
| ENSP00000256398 | ENSP00000337839 |
| ENSP00000256398 | ENSP00000339449 |
| ENSP00000256398 | ENSP00000340271 |
| ENSP00000256398 | ENSP00000340896 |
| ENSP00000256398 | ENSP00000341551 |
| ENSP00000256398 | ENSP00000342381 |
| ENSP00000256398 | ENSP00000343701 |
| ENSP00000256398 | ENSP00000345144 |
| ENSP00000256398 | ENSP00000345702 |
| ENSP00000256398 | ENSP00000346120 |
| ENSP00000256398 | ENSP00000346453 |
| ENSP00000256398 | ENSP00000347168 |
| ENSP00000256398 | ENSP00000348129 |
| ENSP00000256398 | ENSP00000350767 |
| ENSP00000256398 | ENSP00000350967 |
| ENSP00000256398 | ENSP00000352678 |
| ENSP00000256398 | ENSP00000352820 |
| ENSP00000256398 | ENSP00000353059 |
| ENSP00000256398 | ENSP00000353622 |
| ENSP00000256398 | ENSP00000354673 |
| ENSP00000256398 | ENSP00000355013 |
| ENSP00000256398 | ENSP00000355866 |
| ENSP00000256398 | ENSP00000356405 |
| ENSP00000256398 | ENSP00000356548 |
| ENSP00000256398 | ENSP00000356641 |
| ENSP00000256398 | ENSP00000356774 |
| ENSP00000256398 | ENSP00000356811 |
| ENSP00000256398 | ENSP00000357882 |
| ENSP00000256398 | ENSP00000360116 |
| ENSP00000256398 | ENSP00000360473 |
| ENSP00000256398 | ENSP00000360515 |
| ENSP00000256398 | ENSP00000360676 |
| ENSP00000256398 | ENSP00000360828 |
| ENSP00000256398 | ENSP00000361232 |
| ENSP00000256398 | ENSP00000361245 |
| ENSP00000256398 | ENSP00000362352 |
| ENSP00000256398 | ENSP00000363734 |
| ENSP00000256398 | ENSP00000363779 |
| ENSP00000256398 | ENSP00000364582 |
| ENSP00000256398 | ENSP00000364929 |
| ENSP00000256398 | ENSP00000365811 |
| ENSP00000256398 | ENSP00000365837 |
| ENSP00000256398 | ENSP00000366828 |
| ENSP00000256398 | ENSP00000366953 |
| ENSP00000256398 | ENSP00000366974 |
| ENSP00000256398 | ENSP00000367029 |

|                 |                 |
|-----------------|-----------------|
| ENSP00000256398 | ENSP00000367034 |
| ENSP00000256398 | ENSP00000367299 |
| ENSP00000256398 | ENSP00000367766 |
| ENSP00000256398 | ENSP00000368438 |
| ENSP00000256398 | ENSP00000371051 |
| ENSP00000256398 | ENSP00000372694 |
| ENSP00000256398 | ENSP00000373082 |
| ENSP00000256398 | ENSP00000374280 |
| ENSP00000256398 | ENSP00000374529 |
| ENSP00000256398 | ENSP00000376268 |
| ENSP00000256398 | ENSP00000378624 |
| ENSP00000256398 | ENSP00000379888 |
| ENSP00000256398 | ENSP00000380495 |
| ENSP00000256398 | ENSP00000380982 |
| ENSP00000256398 | ENSP00000381657 |
| ENSP00000256398 | ENSP00000382779 |
| ENSP00000256398 | ENSP00000383503 |
| ENSP00000256398 | ENSP00000388320 |
| ENSP00000256398 | ENSP00000389065 |
| ENSP00000256398 | ENSP00000390158 |
| ENSP00000256398 | ENSP00000397259 |
| ENSP00000256398 | ENSP00000397636 |
| ENSP00000256398 | ENSP00000402338 |
| ENSP00000256398 | ENSP00000405636 |
| ENSP00000256398 | ENSP00000410530 |
| ENSP00000256398 | ENSP00000410954 |
| ENSP00000256398 | ENSP00000411327 |
| ENSP00000256398 | ENSP00000412319 |
| ENSP00000256398 | ENSP00000412553 |
| ENSP00000256398 | ENSP00000412922 |
| ENSP00000256398 | ENSP00000413319 |
| ENSP00000256398 | ENSP00000414110 |
| ENSP00000256398 | ENSP00000414373 |
| ENSP00000256398 | ENSP00000415678 |
| ENSP00000256398 | ENSP00000416599 |
| ENSP00000256398 | ENSP00000419599 |
| ENSP00000256404 | ENSP00000258383 |
| ENSP00000256404 | ENSP00000260102 |
| ENSP00000256404 | ENSP00000262077 |
| ENSP00000256404 | ENSP00000264995 |
| ENSP00000256404 | ENSP00000273075 |
| ENSP00000256404 | ENSP00000279242 |
| ENSP00000256404 | ENSP00000288937 |
| ENSP00000256404 | ENSP00000300151 |
| ENSP00000256404 | ENSP00000305503 |
| ENSP00000256404 | ENSP00000306548 |



|                 |                 |
|-----------------|-----------------|
| ENSP00000256404 | ENSP00000308897 |
| ENSP00000256404 | ENSP00000312311 |
| ENSP00000256404 | ENSP00000315017 |
| ENSP00000256404 | ENSP00000324122 |
| ENSP00000256404 | ENSP00000333401 |
| ENSP00000256404 | ENSP00000351015 |
| ENSP00000256404 | ENSP00000360498 |
| ENSP00000256404 | ENSP00000370930 |
| ENSP00000256404 | ENSP00000377486 |
| ENSP00000256404 | ENSP00000417602 |
| ENSP00000256429 | ENSP00000261531 |
| ENSP00000256429 | ENSP00000262367 |
| ENSP00000256429 | ENSP00000264718 |
| ENSP00000256429 | ENSP00000296504 |
| ENSP00000256429 | ENSP00000318085 |
| ENSP00000256429 | ENSP00000319169 |
| ENSP00000256429 | ENSP00000326550 |
| ENSP00000256429 | ENSP00000329933 |
| ENSP00000256429 | ENSP00000349049 |
| ENSP00000256429 | ENSP00000351552 |
| ENSP00000256429 | ENSP00000352516 |
| ENSP00000256429 | ENSP00000353622 |
| ENSP00000256429 | ENSP00000356520 |
| ENSP00000256429 | ENSP00000362441 |
| ENSP00000256429 | ENSP00000362592 |
| ENSP00000256429 | ENSP00000369716 |
| ENSP00000256429 | ENSP00000417281 |
| ENSP00000256433 | ENSP00000343435 |
| ENSP00000256442 | ENSP00000256897 |
| ENSP00000256442 | ENSP00000257789 |
| ENSP00000256442 | ENSP00000257934 |
| ENSP00000256442 | ENSP00000260731 |
| ENSP00000256442 | ENSP00000260810 |
| ENSP00000256442 | ENSP00000261531 |
| ENSP00000256442 | ENSP00000261712 |
| ENSP00000256442 | ENSP00000261819 |
| ENSP00000256442 | ENSP00000262300 |
| ENSP00000256442 | ENSP00000262315 |
| ENSP00000256442 | ENSP00000262460 |
| ENSP00000256442 | ENSP00000262519 |
| ENSP00000256442 | ENSP00000262904 |
| ENSP00000256442 | ENSP00000263026 |
| ENSP00000256442 | ENSP00000263043 |
| ENSP00000256442 | ENSP00000263181 |
| ENSP00000256442 | ENSP00000263201 |
| ENSP00000256442 | ENSP00000263208 |

|                 |                 |
|-----------------|-----------------|
| ENSP00000256442 | ENSP00000263228 |
| ENSP00000256442 | ENSP00000263657 |
| ENSP00000256442 | ENSP00000264169 |
| ENSP00000256442 | ENSP00000264639 |
| ENSP00000256442 | ENSP00000265104 |
| ENSP00000256442 | ENSP00000265140 |
| ENSP00000256442 | ENSP00000265351 |
| ENSP00000256442 | ENSP00000265728 |
| ENSP00000256442 | ENSP00000268043 |
| ENSP00000256442 | ENSP00000269214 |
| ENSP00000256442 | ENSP00000269397 |
| ENSP00000256442 | ENSP00000274255 |
| ENSP00000256442 | ENSP00000274289 |
| ENSP00000256442 | ENSP00000276014 |
| ENSP00000256442 | ENSP00000276893 |
| ENSP00000256442 | ENSP00000278412 |
| ENSP00000256442 | ENSP00000278616 |
| ENSP00000256442 | ENSP00000281708 |
| ENSP00000256442 | ENSP00000285896 |
| ENSP00000256442 | ENSP00000286428 |
| ENSP00000256442 | ENSP00000287598 |
| ENSP00000256442 | ENSP00000293406 |
| ENSP00000256442 | ENSP00000295767 |
| ENSP00000256442 | ENSP00000295901 |
| ENSP00000256442 | ENSP00000296509 |
| ENSP00000256442 | ENSP00000296577 |
| ENSP00000256442 | ENSP00000298048 |
| ENSP00000256442 | ENSP00000298552 |
| ENSP00000256442 | ENSP00000299381 |
| ENSP00000256442 | ENSP00000299543 |
| ENSP00000256442 | ENSP00000300291 |
| ENSP00000256442 | ENSP00000300738 |
| ENSP00000256442 | ENSP00000302111 |
| ENSP00000256442 | ENSP00000302530 |
| ENSP00000256442 | ENSP00000303507 |
| ENSP00000256442 | ENSP00000304226 |
| ENSP00000256442 | ENSP00000305503 |
| ENSP00000256442 | ENSP00000306999 |
| ENSP00000256442 | ENSP00000307023 |
| ENSP00000256442 | ENSP00000307272 |
| ENSP00000256442 | ENSP00000307853 |
| ENSP00000256442 | ENSP00000309474 |
| ENSP00000256442 | ENSP00000309871 |
| ENSP00000256442 | ENSP00000310649 |
| ENSP00000256442 | ENSP00000311083 |
| ENSP00000256442 | ENSP00000313420 |

|                 |                 |
|-----------------|-----------------|
| ENSP00000256442 | ENSP00000314004 |
| ENSP00000256442 | ENSP00000316032 |
| ENSP00000256442 | ENSP00000318775 |
| ENSP00000256442 | ENSP00000318977 |
| ENSP00000256442 | ENSP00000319169 |
| ENSP00000256442 | ENSP00000321636 |
| ENSP00000256442 | ENSP00000322180 |
| ENSP00000256442 | ENSP00000325863 |
| ENSP00000256442 | ENSP00000328720 |
| ENSP00000256442 | ENSP00000332353 |
| ENSP00000256442 | ENSP00000336842 |
| ENSP00000256442 | ENSP00000337396 |
| ENSP00000256442 | ENSP00000339109 |
| ENSP00000256442 | ENSP00000340879 |
| ENSP00000256442 | ENSP00000342307 |
| ENSP00000256442 | ENSP00000343701 |
| ENSP00000256442 | ENSP00000343741 |
| ENSP00000256442 | ENSP00000344547 |
| ENSP00000256442 | ENSP00000346566 |
| ENSP00000256442 | ENSP00000346987 |
| ENSP00000256442 | ENSP00000347087 |
| ENSP00000256442 | ENSP00000347168 |
| ENSP00000256442 | ENSP00000347169 |
| ENSP00000256442 | ENSP00000347232 |
| ENSP00000256442 | ENSP00000347602 |
| ENSP00000256442 | ENSP00000347978 |
| ENSP00000256442 | ENSP00000348554 |
| ENSP00000256442 | ENSP00000348965 |
| ENSP00000256442 | ENSP00000350283 |
| ENSP00000256442 | ENSP00000350491 |
| ENSP00000256442 | ENSP00000350767 |
| ENSP00000256442 | ENSP00000351052 |
| ENSP00000256442 | ENSP00000351284 |
| ENSP00000256442 | ENSP00000351416 |
| ENSP00000256442 | ENSP00000352121 |
| ENSP00000256442 | ENSP00000352257 |
| ENSP00000256442 | ENSP00000352514 |
| ENSP00000256442 | ENSP00000353375 |
| ENSP00000256442 | ENSP00000353698 |
| ENSP00000256442 | ENSP00000353793 |
| ENSP00000256442 | ENSP00000354522 |
| ENSP00000256442 | ENSP00000354558 |
| ENSP00000256442 | ENSP00000354791 |
| ENSP00000256442 | ENSP00000354916 |
| ENSP00000256442 | ENSP00000354927 |
| ENSP00000256442 | ENSP00000355884 |

|                 |                 |
|-----------------|-----------------|
| ENSP00000256442 | ENSP00000356920 |
| ENSP00000256442 | ENSP00000357907 |
| ENSP00000256442 | ENSP00000360025 |
| ENSP00000256442 | ENSP00000360268 |
| ENSP00000256442 | ENSP00000360286 |
| ENSP00000256442 | ENSP00000360532 |
| ENSP00000256442 | ENSP00000360621 |
| ENSP00000256442 | ENSP00000361310 |
| ENSP00000256442 | ENSP00000362334 |
| ENSP00000256442 | ENSP00000363021 |
| ENSP00000256442 | ENSP00000363322 |
| ENSP00000256442 | ENSP00000363827 |
| ENSP00000256442 | ENSP00000364119 |
| ENSP00000256442 | ENSP00000364591 |
| ENSP00000256442 | ENSP00000366974 |
| ENSP00000256442 | ENSP00000367034 |
| ENSP00000256442 | ENSP00000368438 |
| ENSP00000256442 | ENSP00000368565 |
| ENSP00000256442 | ENSP00000368976 |
| ENSP00000256442 | ENSP00000369757 |
| ENSP00000256442 | ENSP00000370151 |
| ENSP00000256442 | ENSP00000370589 |
| ENSP00000256442 | ENSP00000372023 |
| ENSP00000256442 | ENSP00000373060 |
| ENSP00000256442 | ENSP00000374566 |
| ENSP00000256442 | ENSP00000377793 |
| ENSP00000256442 | ENSP00000378350 |
| ENSP00000256442 | ENSP00000378529 |
| ENSP00000256442 | ENSP00000379607 |
| ENSP00000256442 | ENSP00000380256 |
| ENSP00000256442 | ENSP00000381565 |
| ENSP00000256442 | ENSP00000383986 |
| ENSP00000256442 | ENSP00000384048 |
| ENSP00000256442 | ENSP00000385995 |
| ENSP00000256442 | ENSP00000391723 |
| ENSP00000256442 | ENSP00000394394 |
| ENSP00000256442 | ENSP00000402515 |
| ENSP00000256452 | ENSP00000260130 |
| ENSP00000256452 | ENSP00000384053 |
| ENSP00000256474 | ENSP00000258886 |
| ENSP00000256474 | ENSP00000259235 |
| ENSP00000256474 | ENSP00000261600 |
| ENSP00000256474 | ENSP00000261623 |
| ENSP00000256474 | ENSP00000262306 |
| ENSP00000256474 | ENSP00000262375 |
| ENSP00000256474 | ENSP00000263734 |

|                 |                 |
|-----------------|-----------------|
| ENSP00000256474 | ENSP00000273317 |
| ENSP00000256474 | ENSP00000274255 |
| ENSP00000256474 | ENSP00000278520 |
| ENSP00000256474 | ENSP00000278616 |
| ENSP00000256474 | ENSP00000284811 |
| ENSP00000256474 | ENSP00000286428 |
| ENSP00000256474 | ENSP00000290349 |
| ENSP00000256474 | ENSP00000296328 |
| ENSP00000256474 | ENSP00000298852 |
| ENSP00000256474 | ENSP00000299163 |
| ENSP00000256474 | ENSP00000301788 |
| ENSP00000256474 | ENSP00000304051 |
| ENSP00000256474 | ENSP00000304802 |
| ENSP00000256474 | ENSP00000305926 |
| ENSP00000256474 | ENSP00000311313 |
| ENSP00000256474 | ENSP00000314949 |
| ENSP00000256474 | ENSP00000317334 |
| ENSP00000256474 | ENSP00000318089 |
| ENSP00000256474 | ENSP00000318195 |
| ENSP00000256474 | ENSP00000318646 |
| ENSP00000256474 | ENSP00000320340 |
| ENSP00000256474 | ENSP00000324422 |
| ENSP00000256474 | ENSP00000328236 |
| ENSP00000256474 | ENSP00000329357 |
| ENSP00000256474 | ENSP00000333122 |
| ENSP00000256474 | ENSP00000334188 |
| ENSP00000256474 | ENSP00000344547 |
| ENSP00000256474 | ENSP00000346027 |
| ENSP00000256474 | ENSP00000346839 |
| ENSP00000256474 | ENSP00000348984 |
| ENSP00000256474 | ENSP00000350009 |
| ENSP00000256474 | ENSP00000350512 |
| ENSP00000256474 | ENSP00000350767 |
| ENSP00000256474 | ENSP00000351492 |
| ENSP00000256474 | ENSP00000355153 |
| ENSP00000256474 | ENSP00000355601 |
| ENSP00000256474 | ENSP00000355759 |
| ENSP00000256474 | ENSP00000357789 |
| ENSP00000256474 | ENSP00000359345 |
| ENSP00000256474 | ENSP00000366843 |
| ENSP00000256474 | ENSP00000370968 |
| ENSP00000256474 | ENSP00000378529 |
| ENSP00000256474 | ENSP00000382204 |
| ENSP00000256474 | ENSP00000395574 |
| ENSP00000256578 | ENSP00000260643 |
| ENSP00000256578 | ENSP00000276603 |

|                 |                 |
|-----------------|-----------------|
| ENSP00000256578 | ENSP00000286621 |
| ENSP00000256578 | ENSP00000345096 |
| ENSP00000256578 | ENSP00000350249 |
| ENSP00000256578 | ENSP00000367615 |
| ENSP00000256594 | ENSP00000262133 |
| ENSP00000256594 | ENSP00000296684 |
| ENSP00000256594 | ENSP00000314129 |
| ENSP00000256594 | ENSP00000343313 |
| ENSP00000256637 | ENSP00000281187 |
| ENSP00000256637 | ENSP00000299138 |
| ENSP00000256637 | ENSP00000349437 |
| ENSP00000256644 | ENSP00000339245 |
| ENSP00000256644 | ENSP00000351894 |
| ENSP00000256644 | ENSP00000353622 |
| ENSP00000256644 | ENSP00000356231 |
| ENSP00000256658 | ENSP00000258062 |
| ENSP00000256658 | ENSP00000261842 |
| ENSP00000256658 | ENSP00000264705 |
| ENSP00000256658 | ENSP00000269122 |
| ENSP00000256658 | ENSP00000287598 |
| ENSP00000256658 | ENSP00000294543 |
| ENSP00000256658 | ENSP00000299601 |
| ENSP00000256658 | ENSP00000302530 |
| ENSP00000256658 | ENSP00000303279 |
| ENSP00000256658 | ENSP00000314499 |
| ENSP00000256658 | ENSP00000315568 |
| ENSP00000256658 | ENSP00000317431 |
| ENSP00000256658 | ENSP00000320543 |
| ENSP00000256658 | ENSP00000325369 |
| ENSP00000256658 | ENSP00000328773 |
| ENSP00000256658 | ENSP00000330408 |
| ENSP00000256658 | ENSP00000331201 |
| ENSP00000256658 | ENSP00000334836 |
| ENSP00000256658 | ENSP00000340935 |
| ENSP00000256658 | ENSP00000344572 |
| ENSP00000256658 | ENSP00000346022 |
| ENSP00000256658 | ENSP00000348596 |
| ENSP00000256658 | ENSP00000349824 |
| ENSP00000256658 | ENSP00000350199 |
| ENSP00000256658 | ENSP00000352603 |
| ENSP00000256658 | ENSP00000356290 |
| ENSP00000256658 | ENSP00000358423 |
| ENSP00000256658 | ENSP00000359484 |
| ENSP00000256658 | ENSP00000362115 |
| ENSP00000256658 | ENSP00000364794 |
| ENSP00000256658 | ENSP00000369757 |

|                 |                 |
|-----------------|-----------------|
| ENSP00000256658 | ENSP00000377148 |
| ENSP00000256658 | ENSP00000386456 |
| ENSP00000256658 | ENSP00000388340 |
| ENSP00000256707 | ENSP00000333568 |
| ENSP00000256707 | ENSP00000354207 |
| ENSP00000256707 | ENSP00000356405 |
| ENSP00000256722 | ENSP00000298545 |
| ENSP00000256722 | ENSP00000346577 |
| ENSP00000256854 | ENSP00000260129 |
| ENSP00000256854 | ENSP00000260210 |
| ENSP00000256854 | ENSP00000261868 |
| ENSP00000256854 | ENSP00000262027 |
| ENSP00000256854 | ENSP00000262518 |
| ENSP00000256854 | ENSP00000263390 |
| ENSP00000256854 | ENSP00000263985 |
| ENSP00000256854 | ENSP00000264670 |
| ENSP00000256854 | ENSP00000264951 |
| ENSP00000256854 | ENSP00000268379 |
| ENSP00000256854 | ENSP00000282276 |
| ENSP00000256854 | ENSP00000283943 |
| ENSP00000256854 | ENSP00000300648 |
| ENSP00000256854 | ENSP00000302160 |
| ENSP00000256854 | ENSP00000302896 |
| ENSP00000256854 | ENSP00000303279 |
| ENSP00000256854 | ENSP00000307567 |
| ENSP00000256854 | ENSP00000310596 |
| ENSP00000256854 | ENSP00000312735 |
| ENSP00000256854 | ENSP00000317334 |
| ENSP00000256854 | ENSP00000318604 |
| ENSP00000256854 | ENSP00000320566 |
| ENSP00000256854 | ENSP00000329466 |
| ENSP00000256854 | ENSP00000339090 |
| ENSP00000256854 | ENSP00000340019 |
| ENSP00000256854 | ENSP00000341243 |
| ENSP00000256854 | ENSP00000348107 |
| ENSP00000256854 | ENSP00000349887 |
| ENSP00000256854 | ENSP00000352738 |
| ENSP00000256854 | ENSP00000353622 |
| ENSP00000256854 | ENSP00000353998 |
| ENSP00000256854 | ENSP00000354125 |
| ENSP00000256854 | ENSP00000355205 |
| ENSP00000256854 | ENSP00000355890 |
| ENSP00000256854 | ENSP00000356548 |
| ENSP00000256854 | ENSP00000358042 |
| ENSP00000256854 | ENSP00000359518 |
| ENSP00000256854 | ENSP00000360327 |

|                 |                 |
|-----------------|-----------------|
| ENSP00000256854 | ENSP00000361287 |
| ENSP00000256854 | ENSP00000362576 |
| ENSP00000256854 | ENSP00000362688 |
| ENSP00000256854 | ENSP00000362900 |
| ENSP00000256854 | ENSP00000364035 |
| ENSP00000256854 | ENSP00000364794 |
| ENSP00000256854 | ENSP00000367923 |
| ENSP00000256854 | ENSP00000368140 |
| ENSP00000256854 | ENSP00000374213 |
| ENSP00000256854 | ENSP00000376946 |
| ENSP00000256854 | ENSP00000380460 |
| ENSP00000256854 | ENSP00000397598 |
| ENSP00000256854 | ENSP00000401371 |
| ENSP00000256854 | ENSP00000401508 |
| ENSP00000256854 | ENSP00000406293 |
| ENSP00000256854 | ENSP00000417229 |
| ENSP00000256857 | ENSP00000258947 |
| ENSP00000256857 | ENSP00000318195 |
| ENSP00000256857 | ENSP00000363313 |
| ENSP00000256857 | ENSP00000400591 |
| ENSP00000256897 | ENSP00000257934 |
| ENSP00000256897 | ENSP00000259667 |
| ENSP00000256897 | ENSP00000261168 |
| ENSP00000256897 | ENSP00000261211 |
| ENSP00000256897 | ENSP00000261245 |
| ENSP00000256897 | ENSP00000261951 |
| ENSP00000256897 | ENSP00000262608 |
| ENSP00000256897 | ENSP00000263579 |
| ENSP00000256897 | ENSP00000264161 |
| ENSP00000256897 | ENSP00000264926 |
| ENSP00000256897 | ENSP00000265100 |
| ENSP00000256897 | ENSP00000265963 |
| ENSP00000256897 | ENSP00000273064 |
| ENSP00000256897 | ENSP00000280614 |
| ENSP00000256897 | ENSP00000283109 |
| ENSP00000256897 | ENSP00000283875 |
| ENSP00000256897 | ENSP00000285021 |
| ENSP00000256897 | ENSP00000285398 |
| ENSP00000256897 | ENSP00000285896 |
| ENSP00000256897 | ENSP00000286317 |
| ENSP00000256897 | ENSP00000290158 |
| ENSP00000256897 | ENSP00000296328 |
| ENSP00000256897 | ENSP00000299601 |
| ENSP00000256897 | ENSP00000300146 |
| ENSP00000256897 | ENSP00000302120 |
| ENSP00000256897 | ENSP00000302160 |



|                 |                 |
|-----------------|-----------------|
| ENSP00000256897 | ENSP00000309142 |
| ENSP00000256897 | ENSP00000310596 |
| ENSP00000256897 | ENSP00000311083 |
| ENSP00000256897 | ENSP00000311825 |
| ENSP00000256897 | ENSP00000312318 |
| ENSP00000256897 | ENSP00000314949 |
| ENSP00000256897 | ENSP00000317159 |
| ENSP00000256897 | ENSP00000318195 |
| ENSP00000256897 | ENSP00000320949 |
| ENSP00000256897 | ENSP00000321259 |
| ENSP00000256897 | ENSP00000323720 |
| ENSP00000256897 | ENSP00000332444 |
| ENSP00000256897 | ENSP00000333633 |
| ENSP00000256897 | ENSP00000340279 |
| ENSP00000256897 | ENSP00000340466 |
| ENSP00000256897 | ENSP00000348168 |
| ENSP00000256897 | ENSP00000353622 |
| ENSP00000256897 | ENSP00000353660 |
| ENSP00000256897 | ENSP00000354673 |
| ENSP00000256897 | ENSP00000357602 |
| ENSP00000256897 | ENSP00000359290 |
| ENSP00000256897 | ENSP00000363533 |
| ENSP00000256897 | ENSP00000363559 |
| ENSP00000256897 | ENSP00000368646 |
| ENSP00000256897 | ENSP00000369757 |
| ENSP00000256897 | ENSP00000370589 |
| ENSP00000256897 | ENSP00000371236 |
| ENSP00000256897 | ENSP00000375809 |
| ENSP00000256897 | ENSP00000381657 |
| ENSP00000256897 | ENSP00000382492 |
| ENSP00000256897 | ENSP00000416097 |
| ENSP00000256925 | ENSP00000262643 |
| ENSP00000256925 | ENSP00000264731 |
| ENSP00000256925 | ENSP00000295897 |
| ENSP00000256925 | ENSP00000347444 |
| ENSP00000256996 | ENSP00000261424 |
| ENSP00000256996 | ENSP00000265081 |
| ENSP00000256996 | ENSP00000285021 |
| ENSP00000256996 | ENSP00000301019 |
| ENSP00000256996 | ENSP00000301764 |
| ENSP00000256996 | ENSP00000304102 |
| ENSP00000256996 | ENSP00000305790 |
| ENSP00000256996 | ENSP00000313350 |
| ENSP00000256996 | ENSP00000330343 |
| ENSP00000256996 | ENSP00000343741 |
| ENSP00000256996 | ENSP00000347168 |

|                 |                 |
|-----------------|-----------------|
| ENSP00000256996 | ENSP00000350512 |
| ENSP00000256996 | ENSP00000350708 |
| ENSP00000256996 | ENSP00000350767 |
| ENSP00000256996 | ENSP00000351284 |
| ENSP00000256996 | ENSP00000352257 |
| ENSP00000256996 | ENSP00000352928 |
| ENSP00000256996 | ENSP00000353735 |
| ENSP00000256996 | ENSP00000354522 |
| ENSP00000256996 | ENSP00000358857 |
| ENSP00000256996 | ENSP00000360515 |
| ENSP00000256996 | ENSP00000362592 |
| ENSP00000256996 | ENSP00000363021 |
| ENSP00000256996 | ENSP00000364270 |
| ENSP00000256996 | ENSP00000366953 |
| ENSP00000256996 | ENSP00000366974 |
| ENSP00000256996 | ENSP00000367034 |
| ENSP00000256996 | ENSP00000380504 |
| ENSP00000256996 | ENSP00000384109 |
| ENSP00000256996 | ENSP00000386621 |
| ENSP00000256996 | ENSP00000415434 |
| ENSP00000257177 | ENSP00000260956 |
| ENSP00000257177 | ENSP00000262584 |
| ENSP00000257177 | ENSP00000286835 |
| ENSP00000257177 | ENSP00000302530 |
| ENSP00000257177 | ENSP00000313350 |
| ENSP00000257177 | ENSP00000314441 |
| ENSP00000257177 | ENSP00000322457 |
| ENSP00000257177 | ENSP00000338862 |
| ENSP00000257177 | ENSP00000339845 |
| ENSP00000257177 | ENSP00000340879 |
| ENSP00000257177 | ENSP00000343741 |
| ENSP00000257177 | ENSP00000343745 |
| ENSP00000257177 | ENSP00000344401 |
| ENSP00000257177 | ENSP00000351697 |
| ENSP00000257177 | ENSP00000354040 |
| ENSP00000257177 | ENSP00000354522 |
| ENSP00000257177 | ENSP00000354911 |
| ENSP00000257177 | ENSP00000356146 |
| ENSP00000257177 | ENSP00000358812 |
| ENSP00000257177 | ENSP00000366135 |
| ENSP00000257177 | ENSP00000366557 |
| ENSP00000257177 | ENSP00000370151 |
| ENSP00000257177 | ENSP00000370741 |
| ENSP00000257177 | ENSP00000372023 |
| ENSP00000257177 | ENSP00000373404 |
| ENSP00000257177 | ENSP00000380982 |

|                 |                 |
|-----------------|-----------------|
| ENSP00000257177 | ENSP00000402515 |
| ENSP00000257181 | ENSP00000260970 |
| ENSP00000257181 | ENSP00000267812 |
| ENSP00000257181 | ENSP00000296702 |
| ENSP00000257181 | ENSP00000315859 |
| ENSP00000257181 | ENSP00000324274 |
| ENSP00000257181 | ENSP00000348510 |
| ENSP00000257181 | ENSP00000357631 |
| ENSP00000257181 | ENSP00000362820 |
| ENSP00000257181 | ENSP00000362900 |
| ENSP00000257181 | ENSP00000377262 |
| ENSP00000257181 | ENSP00000394085 |
| ENSP00000257215 | ENSP00000269216 |
| ENSP00000257245 | ENSP00000295767 |
| ENSP00000257245 | ENSP00000320236 |
| ENSP00000257245 | ENSP00000354957 |
| ENSP00000257245 | ENSP00000356953 |
| ENSP00000257245 | ENSP00000364699 |
| ENSP00000257245 | ENSP00000367637 |
| ENSP00000257245 | ENSP00000368066 |
| ENSP00000257245 | ENSP00000387262 |
| ENSP00000257287 | ENSP00000270708 |
| ENSP00000257287 | ENSP00000371308 |
| ENSP00000257287 | ENSP00000384490 |
| ENSP00000257312 | ENSP00000384573 |
| ENSP00000257430 | ENSP00000258742 |
| ENSP00000257430 | ENSP00000258743 |
| ENSP00000257430 | ENSP00000261170 |
| ENSP00000257430 | ENSP00000261844 |
| ENSP00000257430 | ENSP00000262077 |
| ENSP00000257430 | ENSP00000262320 |
| ENSP00000257430 | ENSP00000262367 |
| ENSP00000257430 | ENSP00000263734 |
| ENSP00000257430 | ENSP00000263805 |
| ENSP00000257430 | ENSP00000264731 |
| ENSP00000257430 | ENSP00000264883 |
| ENSP00000257430 | ENSP00000265843 |
| ENSP00000257430 | ENSP00000268182 |
| ENSP00000257430 | ENSP00000276072 |
| ENSP00000257430 | ENSP00000280020 |
| ENSP00000257430 | ENSP00000281282 |
| ENSP00000257430 | ENSP00000283195 |
| ENSP00000257430 | ENSP00000287598 |
| ENSP00000257430 | ENSP00000287820 |
| ENSP00000257430 | ENSP00000291688 |
| ENSP00000257430 | ENSP00000296509 |

|                 |                 |
|-----------------|-----------------|
| ENSP00000257430 | ENSP00000296600 |
| ENSP00000257430 | ENSP00000297135 |
| ENSP00000257430 | ENSP00000299259 |
| ENSP00000257430 | ENSP00000300249 |
| ENSP00000257430 | ENSP00000300574 |
| ENSP00000257430 | ENSP00000301764 |
| ENSP00000257430 | ENSP00000302530 |
| ENSP00000257430 | ENSP00000307134 |
| ENSP00000257430 | ENSP00000309474 |
| ENSP00000257430 | ENSP00000313829 |
| ENSP00000257430 | ENSP00000316032 |
| ENSP00000257430 | ENSP00000316845 |
| ENSP00000257430 | ENSP00000318921 |
| ENSP00000257430 | ENSP00000320758 |
| ENSP00000257430 | ENSP00000325376 |
| ENSP00000257430 | ENSP00000325785 |
| ENSP00000257430 | ENSP00000326366 |
| ENSP00000257430 | ENSP00000331201 |
| ENSP00000257430 | ENSP00000336856 |
| ENSP00000257430 | ENSP00000337998 |
| ENSP00000257430 | ENSP00000338983 |
| ENSP00000257430 | ENSP00000340688 |
| ENSP00000257430 | ENSP00000341551 |
| ENSP00000257430 | ENSP00000344456 |
| ENSP00000257430 | ENSP00000347329 |
| ENSP00000257430 | ENSP00000349486 |
| ENSP00000257430 | ENSP00000350297 |
| ENSP00000257430 | ENSP00000350512 |
| ENSP00000257430 | ENSP00000351416 |
| ENSP00000257430 | ENSP00000352400 |
| ENSP00000257430 | ENSP00000352516 |
| ENSP00000257430 | ENSP00000352676 |
| ENSP00000257430 | ENSP00000354560 |
| ENSP00000257430 | ENSP00000354720 |
| ENSP00000257430 | ENSP00000354961 |
| ENSP00000257430 | ENSP00000355536 |
| ENSP00000257430 | ENSP00000356331 |
| ENSP00000257430 | ENSP00000356438 |
| ENSP00000257430 | ENSP00000356448 |
| ENSP00000257430 | ENSP00000357965 |
| ENSP00000257430 | ENSP00000358242 |
| ENSP00000257430 | ENSP00000358335 |
| ENSP00000257430 | ENSP00000358404 |
| ENSP00000257430 | ENSP00000358497 |
| ENSP00000257430 | ENSP00000358994 |
| ENSP00000257430 | ENSP00000359206 |

|                 |                 |
|-----------------|-----------------|
| ENSP00000257430 | ENSP00000363021 |
| ENSP00000257430 | ENSP00000363804 |
| ENSP00000257430 | ENSP00000363921 |
| ENSP00000257430 | ENSP00000364893 |
| ENSP00000257430 | ENSP00000368438 |
| ENSP00000257430 | ENSP00000368767 |
| ENSP00000257430 | ENSP00000371155 |
| ENSP00000257430 | ENSP00000372815 |
| ENSP00000257430 | ENSP00000379394 |
| ENSP00000257430 | ENSP00000386259 |
| ENSP00000257430 | ENSP00000387128 |
| ENSP00000257430 | ENSP00000387170 |
| ENSP00000257430 | ENSP00000394794 |
| ENSP00000257430 | ENSP00000396688 |
| ENSP00000257430 | ENSP00000408236 |
| ENSP00000257430 | ENSP00000413720 |
| ENSP00000257430 | ENSP00000416097 |
| ENSP00000257515 | ENSP00000358081 |
| ENSP00000257527 | ENSP00000261017 |
| ENSP00000257527 | ENSP00000348215 |
| ENSP00000257548 | ENSP00000262052 |
| ENSP00000257548 | ENSP00000262193 |
| ENSP00000257548 | ENSP00000262966 |
| ENSP00000257548 | ENSP00000263202 |
| ENSP00000257548 | ENSP00000263974 |
| ENSP00000257548 | ENSP00000265990 |
| ENSP00000257548 | ENSP00000272645 |
| ENSP00000257548 | ENSP00000273398 |
| ENSP00000257548 | ENSP00000280701 |
| ENSP00000257548 | ENSP00000284320 |
| ENSP00000257548 | ENSP00000290429 |
| ENSP00000257548 | ENSP00000291688 |
| ENSP00000257548 | ENSP00000294053 |
| ENSP00000257548 | ENSP00000296328 |
| ENSP00000257548 | ENSP00000311200 |
| ENSP00000257548 | ENSP00000314949 |
| ENSP00000257548 | ENSP00000348551 |
| ENSP00000257548 | ENSP00000350009 |
| ENSP00000257548 | ENSP00000354951 |
| ENSP00000257548 | ENSP00000360473 |
| ENSP00000257548 | ENSP00000361993 |
| ENSP00000257548 | ENSP00000369335 |
| ENSP00000257548 | ENSP00000381863 |
| ENSP00000257566 | ENSP00000295709 |
| ENSP00000257566 | ENSP00000297261 |
| ENSP00000257566 | ENSP00000314733 |

|                 |                 |
|-----------------|-----------------|
| ENSP00000257566 | ENSP00000355866 |
| ENSP00000257566 | ENSP00000362717 |
| ENSP00000257572 | ENSP00000267953 |
| ENSP00000257572 | ENSP00000309103 |
| ENSP00000257572 | ENSP00000329623 |
| ENSP00000257572 | ENSP00000358022 |
| ENSP00000257575 | ENSP00000265056 |
| ENSP00000257575 | ENSP00000296273 |
| ENSP00000257575 | ENSP00000296755 |
| ENSP00000257575 | ENSP00000300231 |
| ENSP00000257575 | ENSP00000360621 |
| ENSP00000257626 | ENSP00000284981 |
| ENSP00000257626 | ENSP00000294785 |
| ENSP00000257626 | ENSP00000326366 |
| ENSP00000257632 | ENSP00000264234 |
| ENSP00000257694 | ENSP00000345656 |
| ENSP00000257700 | ENSP00000262133 |
| ENSP00000257700 | ENSP00000263897 |
| ENSP00000257700 | ENSP00000264028 |
| ENSP00000257700 | ENSP00000281513 |
| ENSP00000257700 | ENSP00000305810 |
| ENSP00000257700 | ENSP00000310521 |
| ENSP00000257700 | ENSP00000325002 |
| ENSP00000257700 | ENSP00000328079 |
| ENSP00000257700 | ENSP00000329419 |
| ENSP00000257700 | ENSP00000370003 |
| ENSP00000257700 | ENSP00000390783 |
| ENSP00000257749 | ENSP00000266269 |
| ENSP00000257749 | ENSP00000348551 |
| ENSP00000257770 | ENSP00000305689 |
| ENSP00000257770 | ENSP00000346839 |
| ENSP00000257770 | ENSP00000359652 |
| ENSP00000257770 | ENSP00000363827 |
| ENSP00000257770 | ENSP00000369335 |
| ENSP00000257770 | ENSP00000372023 |
| ENSP00000257776 | ENSP00000306697 |
| ENSP00000257787 | ENSP00000263925 |
| ENSP00000257787 | ENSP00000269216 |
| ENSP00000257787 | ENSP00000347836 |
| ENSP00000257787 | ENSP00000370410 |
| ENSP00000257789 | ENSP00000261424 |
| ENSP00000257789 | ENSP00000261531 |
| ENSP00000257789 | ENSP00000261881 |
| ENSP00000257789 | ENSP00000262144 |
| ENSP00000257789 | ENSP00000262315 |
| ENSP00000257789 | ENSP00000263201 |

|                 |                 |
|-----------------|-----------------|
| ENSP00000257789 | ENSP00000264108 |
| ENSP00000257789 | ENSP00000264169 |
| ENSP00000257789 | ENSP00000265056 |
| ENSP00000257789 | ENSP00000265728 |
| ENSP00000257789 | ENSP00000266070 |
| ENSP00000257789 | ENSP00000269468 |
| ENSP00000257789 | ENSP00000276014 |
| ENSP00000257789 | ENSP00000282572 |
| ENSP00000257789 | ENSP00000297431 |
| ENSP00000257789 | ENSP00000307208 |
| ENSP00000257789 | ENSP00000313171 |
| ENSP00000257789 | ENSP00000336868 |
| ENSP00000257789 | ENSP00000340879 |
| ENSP00000257789 | ENSP00000344741 |
| ENSP00000257789 | ENSP00000345917 |
| ENSP00000257789 | ENSP00000346725 |
| ENSP00000257789 | ENSP00000350283 |
| ENSP00000257789 | ENSP00000352257 |
| ENSP00000257789 | ENSP00000353793 |
| ENSP00000257789 | ENSP00000355011 |
| ENSP00000257789 | ENSP00000360215 |
| ENSP00000257789 | ENSP00000360412 |
| ENSP00000257789 | ENSP00000360532 |
| ENSP00000257789 | ENSP00000360621 |
| ENSP00000257789 | ENSP00000362135 |
| ENSP00000257789 | ENSP00000362592 |
| ENSP00000257789 | ENSP00000364037 |
| ENSP00000257789 | ENSP00000366953 |
| ENSP00000257789 | ENSP00000369335 |
| ENSP00000257789 | ENSP00000370151 |
| ENSP00000257789 | ENSP00000371475 |
| ENSP00000257789 | ENSP00000387982 |
| ENSP00000257789 | ENSP00000390475 |
| ENSP00000257829 | ENSP00000260363 |
| ENSP00000257829 | ENSP00000261637 |
| ENSP00000257829 | ENSP00000261708 |
| ENSP00000257829 | ENSP00000262584 |
| ENSP00000257829 | ENSP00000263657 |
| ENSP00000257829 | ENSP00000264230 |
| ENSP00000257829 | ENSP00000264995 |
| ENSP00000257829 | ENSP00000265245 |
| ENSP00000257829 | ENSP00000268482 |
| ENSP00000257829 | ENSP00000268661 |
| ENSP00000257829 | ENSP00000270625 |
| ENSP00000257829 | ENSP00000272521 |
| ENSP00000257829 | ENSP00000274606 |

|                 |                 |
|-----------------|-----------------|
| ENSP00000257829 | ENSP00000274849 |
| ENSP00000257829 | ENSP00000278572 |
| ENSP00000257829 | ENSP00000283109 |
| ENSP00000257829 | ENSP00000287038 |
| ENSP00000257829 | ENSP00000291576 |
| ENSP00000257829 | ENSP00000291582 |
| ENSP00000257829 | ENSP00000295373 |
| ENSP00000257829 | ENSP00000296792 |
| ENSP00000257829 | ENSP00000296802 |
| ENSP00000257829 | ENSP00000297579 |
| ENSP00000257829 | ENSP00000297990 |
| ENSP00000257829 | ENSP00000298283 |
| ENSP00000257829 | ENSP00000298746 |
| ENSP00000257829 | ENSP00000300151 |
| ENSP00000257829 | ENSP00000300648 |
| ENSP00000257829 | ENSP00000302896 |
| ENSP00000257829 | ENSP00000305702 |
| ENSP00000257829 | ENSP00000306548 |
| ENSP00000257829 | ENSP00000308179 |
| ENSP00000257829 | ENSP00000309334 |
| ENSP00000257829 | ENSP00000309433 |
| ENSP00000257829 | ENSP00000309572 |
| ENSP00000257829 | ENSP00000310649 |
| ENSP00000257829 | ENSP00000310723 |
| ENSP00000257829 | ENSP00000311028 |
| ENSP00000257829 | ENSP00000311135 |
| ENSP00000257829 | ENSP00000311430 |
| ENSP00000257829 | ENSP00000314193 |
| ENSP00000257829 | ENSP00000314348 |
| ENSP00000257829 | ENSP00000315674 |
| ENSP00000257829 | ENSP00000317376 |
| ENSP00000257829 | ENSP00000320917 |
| ENSP00000257829 | ENSP00000321449 |
| ENSP00000257829 | ENSP00000323858 |
| ENSP00000257829 | ENSP00000324122 |
| ENSP00000257829 | ENSP00000324403 |
| ENSP00000257829 | ENSP00000325002 |
| ENSP00000257829 | ENSP00000326806 |
| ENSP00000257829 | ENSP00000326981 |
| ENSP00000257829 | ENSP00000327179 |
| ENSP00000257829 | ENSP00000328690 |
| ENSP00000257829 | ENSP00000328854 |
| ENSP00000257829 | ENSP00000329466 |
| ENSP00000257829 | ENSP00000329933 |
| ENSP00000257829 | ENSP00000331907 |
| ENSP00000257829 | ENSP00000332258 |



|                 |                 |
|-----------------|-----------------|
| ENSP00000257829 | ENSP00000332340 |
| ENSP00000257829 | ENSP00000338573 |
| ENSP00000257829 | ENSP00000339095 |
| ENSP00000257829 | ENSP00000339795 |
| ENSP00000257829 | ENSP00000342181 |
| ENSP00000257829 | ENSP00000345156 |
| ENSP00000257829 | ENSP00000345917 |
| ENSP00000257829 | ENSP00000346050 |
| ENSP00000257829 | ENSP00000346120 |
| ENSP00000257829 | ENSP00000346725 |
| ENSP00000257829 | ENSP00000351947 |
| ENSP00000257829 | ENSP00000352678 |
| ENSP00000257829 | ENSP00000354040 |
| ENSP00000257829 | ENSP00000354045 |
| ENSP00000257829 | ENSP00000354522 |
| ENSP00000257829 | ENSP00000355541 |
| ENSP00000257829 | ENSP00000356520 |
| ENSP00000257829 | ENSP00000356591 |
| ENSP00000257829 | ENSP00000357907 |
| ENSP00000257829 | ENSP00000358563 |
| ENSP00000257829 | ENSP00000358812 |
| ENSP00000257829 | ENSP00000359688 |
| ENSP00000257829 | ENSP00000360031 |
| ENSP00000257829 | ENSP00000360412 |
| ENSP00000257829 | ENSP00000360532 |
| ENSP00000257829 | ENSP00000360828 |
| ENSP00000257829 | ENSP00000361076 |
| ENSP00000257829 | ENSP00000361186 |
| ENSP00000257829 | ENSP00000361232 |
| ENSP00000257829 | ENSP00000361982 |
| ENSP00000257829 | ENSP00000362153 |
| ENSP00000257829 | ENSP00000362744 |
| ENSP00000257829 | ENSP00000363018 |
| ENSP00000257829 | ENSP00000363642 |
| ENSP00000257829 | ENSP00000363676 |
| ENSP00000257829 | ENSP00000363746 |
| ENSP00000257829 | ENSP00000364320 |
| ENSP00000257829 | ENSP00000365806 |
| ENSP00000257829 | ENSP00000366557 |
| ENSP00000257829 | ENSP00000366974 |
| ENSP00000257829 | ENSP00000369716 |
| ENSP00000257829 | ENSP00000369757 |
| ENSP00000257829 | ENSP00000370589 |
| ENSP00000257829 | ENSP00000371101 |
| ENSP00000257829 | ENSP00000372199 |
| ENSP00000257829 | ENSP00000372695 |

|                 |                 |
|-----------------|-----------------|
| ENSP00000257829 | ENSP00000373090 |
| ENSP00000257829 | ENSP00000373404 |
| ENSP00000257829 | ENSP00000375730 |
| ENSP00000257829 | ENSP00000377747 |
| ENSP00000257829 | ENSP00000379607 |
| ENSP00000257829 | ENSP00000379888 |
| ENSP00000257829 | ENSP00000380495 |
| ENSP00000257829 | ENSP00000381654 |
| ENSP00000257829 | ENSP00000384302 |
| ENSP00000257829 | ENSP00000386134 |
| ENSP00000257829 | ENSP00000387303 |
| ENSP00000257829 | ENSP00000392601 |
| ENSP00000257829 | ENSP00000394290 |
| ENSP00000257829 | ENSP00000398824 |
| ENSP00000257829 | ENSP00000399454 |
| ENSP00000257829 | ENSP00000402869 |
| ENSP00000257829 | ENSP00000403576 |
| ENSP00000257829 | ENSP00000405614 |
| ENSP00000257829 | ENSP00000409074 |
| ENSP00000257829 | ENSP00000409367 |
| ENSP00000257829 | ENSP00000411162 |
| ENSP00000257829 | ENSP00000414321 |
| ENSP00000257829 | ENSP00000417229 |
| ENSP00000257879 | ENSP00000265354 |
| ENSP00000257879 | ENSP00000303476 |
| ENSP00000257879 | ENSP00000319831 |
| ENSP00000257879 | ENSP00000339958 |
| ENSP00000257879 | ENSP00000340944 |
| ENSP00000257879 | ENSP00000346839 |
| ENSP00000257879 | ENSP00000354951 |
| ENSP00000257879 | ENSP00000355751 |
| ENSP00000257879 | ENSP00000362334 |
| ENSP00000257879 | ENSP00000362717 |
| ENSP00000257879 | ENSP00000369042 |
| ENSP00000257910 | ENSP00000352928 |
| ENSP00000257934 | ENSP00000260363 |
| ENSP00000257934 | ENSP00000260731 |
| ENSP00000257934 | ENSP00000260753 |
| ENSP00000257934 | ENSP00000260766 |
| ENSP00000257934 | ENSP00000262643 |
| ENSP00000257934 | ENSP00000263181 |
| ENSP00000257934 | ENSP00000263736 |
| ENSP00000257934 | ENSP00000264157 |
| ENSP00000257934 | ENSP00000265056 |
| ENSP00000257934 | ENSP00000265148 |
| ENSP00000257934 | ENSP00000265963 |

|                 |                 |
|-----------------|-----------------|
| ENSP00000257934 | ENSP00000269214 |
| ENSP00000257934 | ENSP00000270861 |
| ENSP00000257934 | ENSP00000272444 |
| ENSP00000257934 | ENSP00000274289 |
| ENSP00000257934 | ENSP00000276014 |
| ENSP00000257934 | ENSP00000278616 |
| ENSP00000257934 | ENSP00000282516 |
| ENSP00000257934 | ENSP00000285873 |
| ENSP00000257934 | ENSP00000288976 |
| ENSP00000257934 | ENSP00000295321 |
| ENSP00000257934 | ENSP00000295926 |
| ENSP00000257934 | ENSP00000296509 |
| ENSP00000257934 | ENSP00000296733 |
| ENSP00000257934 | ENSP00000297338 |
| ENSP00000257934 | ENSP00000297431 |
| ENSP00000257934 | ENSP00000298048 |
| ENSP00000257934 | ENSP00000300584 |
| ENSP00000257934 | ENSP00000304437 |
| ENSP00000257934 | ENSP00000306999 |
| ENSP00000257934 | ENSP00000312870 |
| ENSP00000257934 | ENSP00000313420 |
| ENSP00000257934 | ENSP00000316032 |
| ENSP00000257934 | ENSP00000318775 |
| ENSP00000257934 | ENSP00000319104 |
| ENSP00000257934 | ENSP00000321636 |
| ENSP00000257934 | ENSP00000322570 |
| ENSP00000257934 | ENSP00000323439 |
| ENSP00000257934 | ENSP00000324020 |
| ENSP00000257934 | ENSP00000335357 |
| ENSP00000257934 | ENSP00000339109 |
| ENSP00000257934 | ENSP00000341382 |
| ENSP00000257934 | ENSP00000343741 |
| ENSP00000257934 | ENSP00000344936 |
| ENSP00000257934 | ENSP00000346566 |
| ENSP00000257934 | ENSP00000348554 |
| ENSP00000257934 | ENSP00000349959 |
| ENSP00000257934 | ENSP00000351697 |
| ENSP00000257934 | ENSP00000354558 |
| ENSP00000257934 | ENSP00000354720 |
| ENSP00000257934 | ENSP00000354916 |
| ENSP00000257934 | ENSP00000354957 |
| ENSP00000257934 | ENSP00000356319 |
| ENSP00000257934 | ENSP00000356607 |
| ENSP00000257934 | ENSP00000356920 |
| ENSP00000257934 | ENSP00000358423 |
| ENSP00000257934 | ENSP00000358497 |

|                 |                 |
|-----------------|-----------------|
| ENSP00000257934 | ENSP00000360310 |
| ENSP00000257934 | ENSP00000360621 |
| ENSP00000257934 | ENSP00000361264 |
| ENSP00000257934 | ENSP00000368349 |
| ENSP00000257934 | ENSP00000368976 |
| ENSP00000257934 | ENSP00000371475 |
| ENSP00000257934 | ENSP00000371888 |
| ENSP00000257934 | ENSP00000372689 |
| ENSP00000257934 | ENSP00000374529 |
| ENSP00000257934 | ENSP00000374566 |
| ENSP00000257934 | ENSP00000378350 |
| ENSP00000257934 | ENSP00000378529 |
| ENSP00000257934 | ENSP00000384675 |
| ENSP00000257934 | ENSP00000396704 |
| ENSP00000257934 | ENSP00000405963 |
| ENSP00000257934 | ENSP00000413632 |
| ENSP00000257940 | ENSP00000303315 |
| ENSP00000258052 | ENSP00000260433 |
| ENSP00000258052 | ENSP00000261507 |
| ENSP00000258052 | ENSP00000261881 |
| ENSP00000258052 | ENSP00000262300 |
| ENSP00000258052 | ENSP00000262554 |
| ENSP00000258052 | ENSP00000264027 |
| ENSP00000258052 | ENSP00000277010 |
| ENSP00000258052 | ENSP00000285949 |
| ENSP00000258052 | ENSP00000292114 |
| ENSP00000258052 | ENSP00000309259 |
| ENSP00000258052 | ENSP00000315693 |
| ENSP00000258052 | ENSP00000315700 |
| ENSP00000258052 | ENSP00000320604 |
| ENSP00000258052 | ENSP00000322180 |
| ENSP00000258052 | ENSP00000326699 |
| ENSP00000258052 | ENSP00000327716 |
| ENSP00000258052 | ENSP00000341662 |
| ENSP00000258052 | ENSP00000348215 |
| ENSP00000258052 | ENSP00000352121 |
| ENSP00000258052 | ENSP00000360918 |
| ENSP00000258052 | ENSP00000371475 |
| ENSP00000258052 | ENSP00000372023 |
| ENSP00000258052 | ENSP00000380450 |
| ENSP00000258052 | ENSP00000402084 |
| ENSP00000258062 | ENSP00000261842 |
| ENSP00000258062 | ENSP00000267540 |
| ENSP00000258062 | ENSP00000300574 |
| ENSP00000258062 | ENSP00000314499 |
| ENSP00000258062 | ENSP00000334836 |

|                 |                 |
|-----------------|-----------------|
| ENSP00000258062 | ENSP00000336790 |
| ENSP00000258062 | ENSP00000344055 |
| ENSP00000258062 | ENSP00000348602 |
| ENSP00000258062 | ENSP00000349824 |
| ENSP00000258062 | ENSP00000350199 |
| ENSP00000258062 | ENSP00000351926 |
| ENSP00000258062 | ENSP00000360076 |
| ENSP00000258062 | ENSP00000370719 |
| ENSP00000258062 | ENSP00000377148 |
| ENSP00000258062 | ENSP00000384222 |
| ENSP00000258062 | ENSP00000386456 |
| ENSP00000258083 | ENSP00000376776 |
| ENSP00000258105 | ENSP00000258499 |
| ENSP00000258105 | ENSP00000352408 |
| ENSP00000258106 | ENSP00000264731 |
| ENSP00000258106 | ENSP00000272645 |
| ENSP00000258106 | ENSP00000282549 |
| ENSP00000258106 | ENSP00000283921 |
| ENSP00000258106 | ENSP00000337396 |
| ENSP00000258106 | ENSP00000359215 |
| ENSP00000258106 | ENSP00000384597 |
| ENSP00000258169 | ENSP00000258455 |
| ENSP00000258169 | ENSP00000323046 |
| ENSP00000258169 | ENSP00000348107 |
| ENSP00000258169 | ENSP00000349679 |
| ENSP00000258169 | ENSP00000361433 |
| ENSP00000258169 | ENSP00000366135 |
| ENSP00000258169 | ENSP00000379607 |
| ENSP00000258169 | ENSP00000387911 |
| ENSP00000258180 | ENSP00000329002 |
| ENSP00000258200 | ENSP00000264169 |
| ENSP00000258243 | ENSP00000329466 |
| ENSP00000258243 | ENSP00000357283 |
| ENSP00000258301 | ENSP00000259400 |
| ENSP00000258301 | ENSP00000260818 |
| ENSP00000258301 | ENSP00000263116 |
| ENSP00000258301 | ENSP00000263688 |
| ENSP00000258301 | ENSP00000263897 |
| ENSP00000258301 | ENSP00000272322 |
| ENSP00000258301 | ENSP00000286448 |
| ENSP00000258301 | ENSP00000294179 |
| ENSP00000258301 | ENSP00000295119 |
| ENSP00000258301 | ENSP00000303554 |
| ENSP00000258301 | ENSP00000305255 |
| ENSP00000258301 | ENSP00000305810 |
| ENSP00000258301 | ENSP00000309457 |

|                 |                 |
|-----------------|-----------------|
| ENSP00000258301 | ENSP00000310521 |
| ENSP00000258301 | ENSP00000317955 |
| ENSP00000258301 | ENSP00000326534 |
| ENSP00000258301 | ENSP00000327650 |
| ENSP00000258301 | ENSP00000330320 |
| ENSP00000258301 | ENSP00000344055 |
| ENSP00000258301 | ENSP00000357484 |
| ENSP00000258301 | ENSP00000360183 |
| ENSP00000258301 | ENSP00000366225 |
| ENSP00000258301 | ENSP00000369810 |
| ENSP00000258301 | ENSP00000373215 |
| ENSP00000258301 | ENSP00000379933 |
| ENSP00000258301 | ENSP00000381293 |
| ENSP00000258301 | ENSP00000390783 |
| ENSP00000258301 | ENSP00000401435 |
| ENSP00000258301 | ENSP00000406988 |
| ENSP00000258301 | ENSP00000409952 |
| ENSP00000258301 | ENSP00000417748 |
| ENSP00000258301 | ENSP00000418661 |
| ENSP00000258381 | ENSP00000327268 |
| ENSP00000258381 | ENSP00000414187 |
| ENSP00000258383 | ENSP00000260102 |
| ENSP00000258383 | ENSP00000262077 |
| ENSP00000258383 | ENSP00000279242 |
| ENSP00000258383 | ENSP00000288937 |
| ENSP00000258383 | ENSP00000294008 |
| ENSP00000258383 | ENSP00000300151 |
| ENSP00000258383 | ENSP00000301585 |
| ENSP00000258383 | ENSP00000305503 |
| ENSP00000258383 | ENSP00000306548 |
| ENSP00000258383 | ENSP00000308275 |
| ENSP00000258383 | ENSP00000308897 |
| ENSP00000258383 | ENSP00000312311 |
| ENSP00000258383 | ENSP00000315017 |
| ENSP00000258383 | ENSP00000324122 |
| ENSP00000258383 | ENSP00000333401 |
| ENSP00000258383 | ENSP00000360286 |
| ENSP00000258383 | ENSP00000360498 |
| ENSP00000258383 | ENSP00000361699 |
| ENSP00000258383 | ENSP00000365318 |
| ENSP00000258383 | ENSP00000370930 |
| ENSP00000258383 | ENSP00000377486 |
| ENSP00000258383 | ENSP00000383142 |
| ENSP00000258383 | ENSP00000387262 |
| ENSP00000258383 | ENSP00000417602 |
| ENSP00000258390 | ENSP00000354251 |

|                 |                 |
|-----------------|-----------------|
| ENSP00000258390 | ENSP00000361048 |
| ENSP00000258399 | ENSP00000259457 |
| ENSP00000258399 | ENSP00000264515 |
| ENSP00000258399 | ENSP00000266126 |
| ENSP00000258399 | ENSP00000283875 |
| ENSP00000258399 | ENSP00000286835 |
| ENSP00000258399 | ENSP00000295897 |
| ENSP00000258399 | ENSP00000303279 |
| ENSP00000258399 | ENSP00000326921 |
| ENSP00000258399 | ENSP00000331201 |
| ENSP00000258399 | ENSP00000342026 |
| ENSP00000258399 | ENSP00000347498 |
| ENSP00000258399 | ENSP00000348442 |
| ENSP00000258399 | ENSP00000354673 |
| ENSP00000258399 | ENSP00000356146 |
| ENSP00000258399 | ENSP00000364486 |
| ENSP00000258399 | ENSP00000364794 |
| ENSP00000258399 | ENSP00000368349 |
| ENSP00000258399 | ENSP00000370258 |
| ENSP00000258399 | ENSP00000380460 |
| ENSP00000258400 | ENSP00000286758 |
| ENSP00000258400 | ENSP00000370410 |
| ENSP00000258411 | ENSP00000266066 |
| ENSP00000258411 | ENSP00000268459 |
| ENSP00000258411 | ENSP00000296145 |
| ENSP00000258411 | ENSP00000297261 |
| ENSP00000258411 | ENSP00000322304 |
| ENSP00000258411 | ENSP00000344456 |
| ENSP00000258411 | ENSP00000358404 |
| ENSP00000258415 | ENSP00000265896 |
| ENSP00000258415 | ENSP00000304592 |
| ENSP00000258415 | ENSP00000348762 |
| ENSP00000258415 | ENSP00000368646 |
| ENSP00000258416 | ENSP00000260956 |
| ENSP00000258416 | ENSP00000264951 |
| ENSP00000258416 | ENSP00000285896 |
| ENSP00000258416 | ENSP00000296802 |
| ENSP00000258416 | ENSP00000302160 |
| ENSP00000258416 | ENSP00000302768 |
| ENSP00000258416 | ENSP00000302955 |
| ENSP00000258416 | ENSP00000310040 |
| ENSP00000258416 | ENSP00000311876 |
| ENSP00000258416 | ENSP00000314311 |
| ENSP00000258416 | ENSP00000316879 |
| ENSP00000258416 | ENSP00000318646 |
| ENSP00000258416 | ENSP00000321617 |

|                 |                 |
|-----------------|-----------------|
| ENSP00000258416 | ENSP00000321711 |
| ENSP00000258416 | ENSP00000325677 |
| ENSP00000258416 | ENSP00000328103 |
| ENSP00000258416 | ENSP00000336702 |
| ENSP00000258416 | ENSP00000340281 |
| ENSP00000258416 | ENSP00000345096 |
| ENSP00000258416 | ENSP00000364289 |
| ENSP00000258416 | ENSP00000369965 |
| ENSP00000258416 | ENSP00000379888 |
| ENSP00000258416 | ENSP00000387170 |
| ENSP00000258416 | ENSP00000392859 |
| ENSP00000258418 | ENSP00000261951 |
| ENSP00000258418 | ENSP00000266581 |
| ENSP00000258418 | ENSP00000276282 |
| ENSP00000258418 | ENSP00000292616 |
| ENSP00000258418 | ENSP00000294818 |
| ENSP00000258418 | ENSP00000295628 |
| ENSP00000258418 | ENSP00000296144 |
| ENSP00000258418 | ENSP00000298288 |
| ENSP00000258418 | ENSP00000298910 |
| ENSP00000258418 | ENSP00000300417 |
| ENSP00000258418 | ENSP00000303248 |
| ENSP00000258418 | ENSP00000304923 |
| ENSP00000258418 | ENSP00000306864 |
| ENSP00000258418 | ENSP00000307023 |
| ENSP00000258418 | ENSP00000311505 |
| ENSP00000258418 | ENSP00000314901 |
| ENSP00000258418 | ENSP00000315702 |
| ENSP00000258418 | ENSP00000319303 |
| ENSP00000258418 | ENSP00000326324 |
| ENSP00000258418 | ENSP00000326759 |
| ENSP00000258418 | ENSP00000329380 |
| ENSP00000258418 | ENSP00000332879 |
| ENSP00000258418 | ENSP00000337797 |
| ENSP00000258418 | ENSP00000338887 |
| ENSP00000258418 | ENSP00000341944 |
| ENSP00000258418 | ENSP00000344242 |
| ENSP00000258418 | ENSP00000344758 |
| ENSP00000258418 | ENSP00000345985 |
| ENSP00000258418 | ENSP00000346155 |
| ENSP00000258418 | ENSP00000346809 |
| ENSP00000258418 | ENSP00000347451 |
| ENSP00000258418 | ENSP00000348215 |
| ENSP00000258418 | ENSP00000348278 |
| ENSP00000258418 | ENSP00000349486 |
| ENSP00000258418 | ENSP00000351113 |



|                 |                 |
|-----------------|-----------------|
| ENSP00000258418 | ENSP00000356191 |
| ENSP00000258418 | ENSP00000356247 |
| ENSP00000258418 | ENSP00000358765 |
| ENSP00000258418 | ENSP00000360560 |
| ENSP00000258418 | ENSP00000361185 |
| ENSP00000258418 | ENSP00000364700 |
| ENSP00000258418 | ENSP00000366121 |
| ENSP00000258418 | ENSP00000368135 |
| ENSP00000258418 | ENSP00000369395 |
| ENSP00000258418 | ENSP00000373600 |
| ENSP00000258418 | ENSP00000373853 |
| ENSP00000258418 | ENSP00000383382 |
| ENSP00000258418 | ENSP00000386357 |
| ENSP00000258418 | ENSP00000399441 |
| ENSP00000258418 | ENSP00000406367 |
| ENSP00000258418 | ENSP00000411568 |
| ENSP00000258424 | ENSP00000261813 |
| ENSP00000258424 | ENSP00000268379 |
| ENSP00000258424 | ENSP00000274787 |
| ENSP00000258424 | ENSP00000287022 |
| ENSP00000258424 | ENSP00000297564 |
| ENSP00000258424 | ENSP00000307786 |
| ENSP00000258424 | ENSP00000309565 |
| ENSP00000258424 | ENSP00000314380 |
| ENSP00000258424 | ENSP00000317159 |
| ENSP00000258424 | ENSP00000317780 |
| ENSP00000258424 | ENSP00000319169 |
| ENSP00000258424 | ENSP00000328938 |
| ENSP00000258424 | ENSP00000331897 |
| ENSP00000258424 | ENSP00000332887 |
| ENSP00000258424 | ENSP00000342300 |
| ENSP00000258424 | ENSP00000354499 |
| ENSP00000258424 | ENSP00000354554 |
| ENSP00000258424 | ENSP00000354876 |
| ENSP00000258424 | ENSP00000354982 |
| ENSP00000258424 | ENSP00000355572 |
| ENSP00000258424 | ENSP00000360782 |
| ENSP00000258424 | ENSP00000361042 |
| ENSP00000258424 | ENSP00000365243 |
| ENSP00000258424 | ENSP00000367934 |
| ENSP00000258424 | ENSP00000387262 |
| ENSP00000258428 | ENSP00000263642 |
| ENSP00000258428 | ENSP00000264233 |
| ENSP00000258428 | ENSP00000265081 |
| ENSP00000258428 | ENSP00000265990 |
| ENSP00000258428 | ENSP00000267430 |

|                 |                 |
|-----------------|-----------------|
| ENSP00000258428 | ENSP00000268124 |
| ENSP00000258428 | ENSP00000269214 |
| ENSP00000258428 | ENSP00000282516 |
| ENSP00000258428 | ENSP00000296509 |
| ENSP00000258428 | ENSP00000297338 |
| ENSP00000258428 | ENSP00000299206 |
| ENSP00000258428 | ENSP00000306561 |
| ENSP00000258428 | ENSP00000306999 |
| ENSP00000258428 | ENSP00000307853 |
| ENSP00000258428 | ENSP00000308944 |
| ENSP00000258428 | ENSP00000310520 |
| ENSP00000258428 | ENSP00000311368 |
| ENSP00000258428 | ENSP00000311873 |
| ENSP00000258428 | ENSP00000313350 |
| ENSP00000258428 | ENSP00000313851 |
| ENSP00000258428 | ENSP00000318977 |
| ENSP00000258428 | ENSP00000323439 |
| ENSP00000258428 | ENSP00000327145 |
| ENSP00000258428 | ENSP00000336606 |
| ENSP00000258428 | ENSP00000340305 |
| ENSP00000258428 | ENSP00000341382 |
| ENSP00000258428 | ENSP00000343392 |
| ENSP00000258428 | ENSP00000347978 |
| ENSP00000258428 | ENSP00000348089 |
| ENSP00000258428 | ENSP00000351284 |
| ENSP00000258428 | ENSP00000351697 |
| ENSP00000258428 | ENSP00000351947 |
| ENSP00000258428 | ENSP00000352257 |
| ENSP00000258428 | ENSP00000354720 |
| ENSP00000258428 | ENSP00000354957 |
| ENSP00000258428 | ENSP00000358478 |
| ENSP00000258428 | ENSP00000361310 |
| ENSP00000258428 | ENSP00000364270 |
| ENSP00000258428 | ENSP00000365588 |
| ENSP00000258428 | ENSP00000367808 |
| ENSP00000258428 | ENSP00000368438 |
| ENSP00000258428 | ENSP00000369335 |
| ENSP00000258428 | ENSP00000370150 |
| ENSP00000258428 | ENSP00000371475 |
| ENSP00000258428 | ENSP00000372316 |
| ENSP00000258428 | ENSP00000373060 |
| ENSP00000258428 | ENSP00000381657 |
| ENSP00000258428 | ENSP00000384048 |
| ENSP00000258428 | ENSP00000387429 |
| ENSP00000258428 | ENSP00000396484 |
| ENSP00000258428 | ENSP00000404318 |

|                 |                 |
|-----------------|-----------------|
| ENSP00000258428 | ENSP00000406490 |
| ENSP00000258428 | ENSP00000409167 |
| ENSP00000258428 | ENSP00000415212 |
| ENSP00000258428 | ENSP00000416511 |
| ENSP00000258443 | ENSP00000335076 |
| ENSP00000258443 | ENSP00000363680 |
| ENSP00000258455 | ENSP00000259469 |
| ENSP00000258455 | ENSP00000260102 |
| ENSP00000258455 | ENSP00000260443 |
| ENSP00000258455 | ENSP00000260956 |
| ENSP00000258455 | ENSP00000261015 |
| ENSP00000258455 | ENSP00000262584 |
| ENSP00000258455 | ENSP00000263629 |
| ENSP00000258455 | ENSP00000264995 |
| ENSP00000258455 | ENSP00000265107 |
| ENSP00000258455 | ENSP00000268206 |
| ENSP00000258455 | ENSP00000268379 |
| ENSP00000258455 | ENSP00000268661 |
| ENSP00000258455 | ENSP00000270625 |
| ENSP00000258455 | ENSP00000272418 |
| ENSP00000258455 | ENSP00000274606 |
| ENSP00000258455 | ENSP00000278412 |
| ENSP00000258455 | ENSP00000278572 |
| ENSP00000258455 | ENSP00000280557 |
| ENSP00000258455 | ENSP00000281141 |
| ENSP00000258455 | ENSP00000283109 |
| ENSP00000258455 | ENSP00000285873 |
| ENSP00000258455 | ENSP00000287038 |
| ENSP00000258455 | ENSP00000289371 |
| ENSP00000258455 | ENSP00000294189 |
| ENSP00000258455 | ENSP00000295491 |
| ENSP00000258455 | ENSP00000296577 |
| ENSP00000258455 | ENSP00000296674 |
| ENSP00000258455 | ENSP00000296802 |
| ENSP00000258455 | ENSP00000296805 |
| ENSP00000258455 | ENSP00000297579 |
| ENSP00000258455 | ENSP00000297908 |
| ENSP00000258455 | ENSP00000298283 |
| ENSP00000258455 | ENSP00000300151 |
| ENSP00000258455 | ENSP00000300213 |
| ENSP00000258455 | ENSP00000301585 |
| ENSP00000258455 | ENSP00000302896 |
| ENSP00000258455 | ENSP00000303191 |
| ENSP00000258455 | ENSP00000305653 |
| ENSP00000258455 | ENSP00000306548 |
| ENSP00000258455 | ENSP00000307889 |

|                 |                 |
|-----------------|-----------------|
| ENSP00000258455 | ENSP00000308179 |
| ENSP00000258455 | ENSP00000308897 |
| ENSP00000258455 | ENSP00000309334 |
| ENSP00000258455 | ENSP00000311028 |
| ENSP00000258455 | ENSP00000311430 |
| ENSP00000258455 | ENSP00000314193 |
| ENSP00000258455 | ENSP00000314311 |
| ENSP00000258455 | ENSP00000317376 |
| ENSP00000258455 | ENSP00000318374 |
| ENSP00000258455 | ENSP00000318604 |
| ENSP00000258455 | ENSP00000318646 |
| ENSP00000258455 | ENSP00000322419 |
| ENSP00000258455 | ENSP00000323856 |
| ENSP00000258455 | ENSP00000326981 |
| ENSP00000258455 | ENSP00000327179 |
| ENSP00000258455 | ENSP00000331019 |
| ENSP00000258455 | ENSP00000336702 |
| ENSP00000258455 | ENSP00000337127 |
| ENSP00000258455 | ENSP00000337839 |
| ENSP00000258455 | ENSP00000339095 |
| ENSP00000258455 | ENSP00000339795 |
| ENSP00000258455 | ENSP00000341692 |
| ENSP00000258455 | ENSP00000341885 |
| ENSP00000258455 | ENSP00000345156 |
| ENSP00000258455 | ENSP00000346015 |
| ENSP00000258455 | ENSP00000346022 |
| ENSP00000258455 | ENSP00000346027 |
| ENSP00000258455 | ENSP00000346037 |
| ENSP00000258455 | ENSP00000346050 |
| ENSP00000258455 | ENSP00000346067 |
| ENSP00000258455 | ENSP00000346120 |
| ENSP00000258455 | ENSP00000347087 |
| ENSP00000258455 | ENSP00000352706 |
| ENSP00000258455 | ENSP00000354522 |
| ENSP00000258455 | ENSP00000354739 |
| ENSP00000258455 | ENSP00000355471 |
| ENSP00000258455 | ENSP00000356134 |
| ENSP00000258455 | ENSP00000358812 |
| ENSP00000258455 | ENSP00000359345 |
| ENSP00000258455 | ENSP00000360782 |
| ENSP00000258455 | ENSP00000361076 |
| ENSP00000258455 | ENSP00000361206 |
| ENSP00000258455 | ENSP00000362036 |
| ENSP00000258455 | ENSP00000362208 |
| ENSP00000258455 | ENSP00000362744 |
| ENSP00000258455 | ENSP00000363018 |

|                 |                 |
|-----------------|-----------------|
| ENSP00000258455 | ENSP00000363676 |
| ENSP00000258455 | ENSP00000364320 |
| ENSP00000258455 | ENSP00000368790 |
| ENSP00000258455 | ENSP00000368887 |
| ENSP00000258455 | ENSP00000369757 |
| ENSP00000258455 | ENSP00000372445 |
| ENSP00000258455 | ENSP00000373404 |
| ENSP00000258455 | ENSP00000375730 |
| ENSP00000258455 | ENSP00000377486 |
| ENSP00000258455 | ENSP00000377640 |
| ENSP00000258455 | ENSP00000379213 |
| ENSP00000258455 | ENSP00000379888 |
| ENSP00000258455 | ENSP00000380156 |
| ENSP00000258455 | ENSP00000382250 |
| ENSP00000258455 | ENSP00000382779 |
| ENSP00000258455 | ENSP00000386717 |
| ENSP00000258455 | ENSP00000389103 |
| ENSP00000258455 | ENSP00000393241 |
| ENSP00000258455 | ENSP00000402338 |
| ENSP00000258455 | ENSP00000403175 |
| ENSP00000258455 | ENSP00000412583 |
| ENSP00000258455 | ENSP00000414321 |
| ENSP00000258455 | ENSP00000416110 |
| ENSP00000258494 | ENSP00000301585 |
| ENSP00000258499 | ENSP00000262193 |
| ENSP00000258499 | ENSP00000263974 |
| ENSP00000258499 | ENSP00000265990 |
| ENSP00000258499 | ENSP00000272645 |
| ENSP00000258499 | ENSP00000284320 |
| ENSP00000258499 | ENSP00000287598 |
| ENSP00000258499 | ENSP00000291688 |
| ENSP00000258499 | ENSP00000296328 |
| ENSP00000258499 | ENSP00000301788 |
| ENSP00000258499 | ENSP00000302530 |
| ENSP00000258499 | ENSP00000307260 |
| ENSP00000258499 | ENSP00000309572 |
| ENSP00000258499 | ENSP00000314949 |
| ENSP00000258499 | ENSP00000333401 |
| ENSP00000258499 | ENSP00000348551 |
| ENSP00000258499 | ENSP00000350009 |
| ENSP00000258499 | ENSP00000360473 |
| ENSP00000258499 | ENSP00000370930 |
| ENSP00000258499 | ENSP00000381863 |
| ENSP00000258499 | ENSP00000406888 |
| ENSP00000258648 | ENSP00000260956 |
| ENSP00000258648 | ENSP00000261531 |

|                 |                 |
|-----------------|-----------------|
| ENSP00000258648 | ENSP00000261758 |
| ENSP00000258648 | ENSP00000261884 |
| ENSP00000258648 | ENSP00000262367 |
| ENSP00000258648 | ENSP00000263205 |
| ENSP00000258648 | ENSP00000263390 |
| ENSP00000258648 | ENSP00000265350 |
| ENSP00000258648 | ENSP00000267064 |
| ENSP00000258648 | ENSP00000268711 |
| ENSP00000258648 | ENSP00000282007 |
| ENSP00000258648 | ENSP00000284981 |
| ENSP00000258648 | ENSP00000286317 |
| ENSP00000258648 | ENSP00000290663 |
| ENSP00000258648 | ENSP00000292035 |
| ENSP00000258648 | ENSP00000293777 |
| ENSP00000258648 | ENSP00000297347 |
| ENSP00000258648 | ENSP00000299543 |
| ENSP00000258648 | ENSP00000300651 |
| ENSP00000258648 | ENSP00000323720 |
| ENSP00000258648 | ENSP00000325612 |
| ENSP00000258648 | ENSP00000326128 |
| ENSP00000258648 | ENSP00000326767 |
| ENSP00000258648 | ENSP00000337340 |
| ENSP00000258648 | ENSP00000342434 |
| ENSP00000258648 | ENSP00000349640 |
| ENSP00000258648 | ENSP00000354620 |
| ENSP00000258648 | ENSP00000354951 |
| ENSP00000258648 | ENSP00000355317 |
| ENSP00000258648 | ENSP00000357047 |
| ENSP00000258648 | ENSP00000357907 |
| ENSP00000258648 | ENSP00000360371 |
| ENSP00000258648 | ENSP00000360532 |
| ENSP00000258648 | ENSP00000362948 |
| ENSP00000258648 | ENSP00000363193 |
| ENSP00000258648 | ENSP00000365588 |
| ENSP00000258648 | ENSP00000369162 |
| ENSP00000258648 | ENSP00000373060 |
| ENSP00000258648 | ENSP00000384048 |
| ENSP00000258648 | ENSP00000387429 |
| ENSP00000258648 | ENSP00000391774 |
| ENSP00000258648 | ENSP00000392617 |
| ENSP00000258648 | ENSP00000396484 |
| ENSP00000258648 | ENSP00000404318 |
| ENSP00000258648 | ENSP00000409167 |
| ENSP00000258648 | ENSP00000415212 |
| ENSP00000258648 | ENSP00000416511 |
| ENSP00000258648 | ENSP00000418734 |

|                 |                 |
|-----------------|-----------------|
| ENSP00000258654 | ENSP00000262544 |
| ENSP00000258654 | ENSP00000264028 |
| ENSP00000258654 | ENSP00000265175 |
| ENSP00000258654 | ENSP00000282884 |
| ENSP00000258654 | ENSP00000286448 |
| ENSP00000258654 | ENSP00000291574 |
| ENSP00000258654 | ENSP00000294179 |
| ENSP00000258654 | ENSP00000305442 |
| ENSP00000258654 | ENSP00000305459 |
| ENSP00000258654 | ENSP00000310521 |
| ENSP00000258654 | ENSP00000311134 |
| ENSP00000258654 | ENSP00000325002 |
| ENSP00000258654 | ENSP00000328079 |
| ENSP00000258654 | ENSP00000329419 |
| ENSP00000258654 | ENSP00000355629 |
| ENSP00000258654 | ENSP00000356411 |
| ENSP00000258654 | ENSP00000361076 |
| ENSP00000258654 | ENSP00000362576 |
| ENSP00000258654 | ENSP00000363349 |
| ENSP00000258654 | ENSP00000390783 |
| ENSP00000258654 | ENSP00000397441 |
| ENSP00000258654 | ENSP00000403397 |
| ENSP00000258654 | ENSP00000406988 |
| ENSP00000258654 | ENSP00000409952 |
| ENSP00000258662 | ENSP00000264228 |
| ENSP00000258679 | ENSP00000355153 |
| ENSP00000258682 | ENSP00000279230 |
| ENSP00000258682 | ENSP00000296238 |
| ENSP00000258682 | ENSP00000312664 |
| ENSP00000258682 | ENSP00000324573 |
| ENSP00000258682 | ENSP00000331727 |
| ENSP00000258682 | ENSP00000345731 |
| ENSP00000258682 | ENSP00000349022 |
| ENSP00000258682 | ENSP00000351593 |
| ENSP00000258682 | ENSP00000353508 |
| ENSP00000258682 | ENSP00000367408 |
| ENSP00000258682 | ENSP00000381863 |
| ENSP00000258711 | ENSP00000259253 |
| ENSP00000258742 | ENSP00000264029 |
| ENSP00000258742 | ENSP00000264932 |
| ENSP00000258742 | ENSP00000272902 |
| ENSP00000258742 | ENSP00000296490 |
| ENSP00000258742 | ENSP00000301329 |
| ENSP00000258742 | ENSP00000304185 |
| ENSP00000258742 | ENSP00000307004 |
| ENSP00000258742 | ENSP00000308622 |

|                 |                 |
|-----------------|-----------------|
| ENSP00000258742 | ENSP00000311768 |
| ENSP00000258742 | ENSP00000313243 |
| ENSP00000258742 | ENSP00000320130 |
| ENSP00000258742 | ENSP00000331879 |
| ENSP00000258742 | ENSP00000346206 |
| ENSP00000258742 | ENSP00000349022 |
| ENSP00000258742 | ENSP00000357440 |
| ENSP00000258742 | ENSP00000358854 |
| ENSP00000258742 | ENSP00000359444 |
| ENSP00000258742 | ENSP00000360286 |
| ENSP00000258742 | ENSP00000362463 |
| ENSP00000258742 | ENSP00000373509 |
| ENSP00000258742 | ENSP00000381970 |
| ENSP00000258743 | ENSP00000338157 |
| ENSP00000258743 | ENSP00000338799 |
| ENSP00000258743 | ENSP00000357470 |
| ENSP00000258743 | ENSP00000379213 |
| ENSP00000258770 | ENSP00000304311 |
| ENSP00000258770 | ENSP00000397435 |
| ENSP00000258774 | ENSP00000260810 |
| ENSP00000258774 | ENSP00000261454 |
| ENSP00000258774 | ENSP00000261881 |
| ENSP00000258774 | ENSP00000262519 |
| ENSP00000258774 | ENSP00000265140 |
| ENSP00000258774 | ENSP00000267197 |
| ENSP00000258774 | ENSP00000278616 |
| ENSP00000258774 | ENSP00000283033 |
| ENSP00000258774 | ENSP00000286091 |
| ENSP00000258774 | ENSP00000322570 |
| ENSP00000258774 | ENSP00000323439 |
| ENSP00000258774 | ENSP00000325863 |
| ENSP00000258774 | ENSP00000340879 |
| ENSP00000258774 | ENSP00000343741 |
| ENSP00000258774 | ENSP00000351697 |
| ENSP00000258774 | ENSP00000352257 |
| ENSP00000258774 | ENSP00000354957 |
| ENSP00000258774 | ENSP00000361310 |
| ENSP00000258774 | ENSP00000363021 |
| ENSP00000258774 | ENSP00000364270 |
| ENSP00000258774 | ENSP00000368349 |
| ENSP00000258774 | ENSP00000368438 |
| ENSP00000258774 | ENSP00000370151 |
| ENSP00000258774 | ENSP00000371475 |
| ENSP00000258774 | ENSP00000392270 |
| ENSP00000258774 | ENSP00000420298 |
| ENSP00000258829 | ENSP00000342828 |



|                 |                 |
|-----------------|-----------------|
| ENSP00000258873 | ENSP00000320646 |
| ENSP00000258873 | ENSP00000357650 |
| ENSP00000258873 | ENSP00000359380 |
| ENSP00000258873 | ENSP00000367407 |
| ENSP00000258873 | ENSP00000369042 |
| ENSP00000258874 | ENSP00000300181 |
| ENSP00000258874 | ENSP00000310623 |
| ENSP00000258874 | ENSP00000356290 |
| ENSP00000258874 | ENSP00000377617 |
| ENSP00000258886 | ENSP00000264029 |
| ENSP00000258886 | ENSP00000268668 |
| ENSP00000258886 | ENSP00000274030 |
| ENSP00000258886 | ENSP00000282541 |
| ENSP00000258886 | ENSP00000296684 |
| ENSP00000258886 | ENSP00000307786 |
| ENSP00000258886 | ENSP00000317159 |
| ENSP00000258886 | ENSP00000339826 |
| ENSP00000258886 | ENSP00000341838 |
| ENSP00000258886 | ENSP00000342056 |
| ENSP00000258886 | ENSP00000344866 |
| ENSP00000258886 | ENSP00000348632 |
| ENSP00000258886 | ENSP00000354251 |
| ENSP00000258886 | ENSP00000358737 |
| ENSP00000258886 | ENSP00000366482 |
| ENSP00000258886 | ENSP00000367923 |
| ENSP00000258886 | ENSP00000368565 |
| ENSP00000258886 | ENSP00000409275 |
| ENSP00000258947 | ENSP00000262419 |
| ENSP00000258947 | ENSP00000263925 |
| ENSP00000258947 | ENSP00000264447 |
| ENSP00000258947 | ENSP00000268720 |
| ENSP00000258947 | ENSP00000288422 |
| ENSP00000258947 | ENSP00000289013 |
| ENSP00000258947 | ENSP00000295878 |
| ENSP00000258947 | ENSP00000297431 |
| ENSP00000258947 | ENSP00000297532 |
| ENSP00000258947 | ENSP00000309606 |
| ENSP00000258947 | ENSP00000309629 |
| ENSP00000258947 | ENSP00000311134 |
| ENSP00000258947 | ENSP00000311505 |
| ENSP00000258947 | ENSP00000321706 |
| ENSP00000258947 | ENSP00000324292 |
| ENSP00000258947 | ENSP00000329967 |
| ENSP00000258947 | ENSP00000349822 |
| ENSP00000258947 | ENSP00000354270 |
| ENSP00000258947 | ENSP00000354777 |

|                 |                 |
|-----------------|-----------------|
| ENSP00000258947 | ENSP00000355840 |
| ENSP00000258947 | ENSP00000355944 |
| ENSP00000258947 | ENSP00000357887 |
| ENSP00000258947 | ENSP00000358994 |
| ENSP00000258947 | ENSP00000359115 |
| ENSP00000258947 | ENSP00000359740 |
| ENSP00000258947 | ENSP00000361186 |
| ENSP00000258947 | ENSP00000362807 |
| ENSP00000258947 | ENSP00000363021 |
| ENSP00000258947 | ENSP00000364126 |
| ENSP00000258947 | ENSP00000365175 |
| ENSP00000258947 | ENSP00000370410 |
| ENSP00000258947 | ENSP00000371805 |
| ENSP00000258947 | ENSP00000379612 |
| ENSP00000258947 | ENSP00000381795 |
| ENSP00000258947 | ENSP00000396876 |
| ENSP00000258947 | ENSP00000401980 |
| ENSP00000258947 | ENSP00000419371 |
| ENSP00000258975 | ENSP00000263629 |
| ENSP00000258975 | ENSP00000289371 |
| ENSP00000258975 | ENSP00000301585 |
| ENSP00000258975 | ENSP00000304350 |
| ENSP00000258975 | ENSP00000343885 |
| ENSP00000258975 | ENSP00000362576 |
| ENSP00000258991 | ENSP00000276416 |
| ENSP00000258991 | ENSP00000295030 |
| ENSP00000258991 | ENSP00000348602 |
| ENSP00000259008 | ENSP00000260810 |
| ENSP00000259008 | ENSP00000260947 |
| ENSP00000259008 | ENSP00000261245 |
| ENSP00000259008 | ENSP00000261424 |
| ENSP00000259008 | ENSP00000261584 |
| ENSP00000259008 | ENSP00000264926 |
| ENSP00000259008 | ENSP00000265056 |
| ENSP00000259008 | ENSP00000265849 |
| ENSP00000259008 | ENSP00000267430 |
| ENSP00000259008 | ENSP00000268043 |
| ENSP00000259008 | ENSP00000269214 |
| ENSP00000259008 | ENSP00000273398 |
| ENSP00000259008 | ENSP00000279281 |
| ENSP00000259008 | ENSP00000283875 |
| ENSP00000259008 | ENSP00000287598 |
| ENSP00000259008 | ENSP00000296509 |
| ENSP00000259008 | ENSP00000297338 |
| ENSP00000259008 | ENSP00000302530 |
| ENSP00000259008 | ENSP00000306999 |

|                 |                 |
|-----------------|-----------------|
| ENSP00000259008 | ENSP00000307853 |
| ENSP00000259008 | ENSP00000310520 |
| ENSP00000259008 | ENSP00000313350 |
| ENSP00000259008 | ENSP00000321636 |
| ENSP00000259008 | ENSP00000322570 |
| ENSP00000259008 | ENSP00000325290 |
| ENSP00000259008 | ENSP00000325863 |
| ENSP00000259008 | ENSP00000333837 |
| ENSP00000259008 | ENSP00000347232 |
| ENSP00000259008 | ENSP00000348168 |
| ENSP00000259008 | ENSP00000350283 |
| ENSP00000259008 | ENSP00000351697 |
| ENSP00000259008 | ENSP00000355185 |
| ENSP00000259008 | ENSP00000359818 |
| ENSP00000259008 | ENSP00000360621 |
| ENSP00000259008 | ENSP00000364270 |
| ENSP00000259008 | ENSP00000366135 |
| ENSP00000259008 | ENSP00000368349 |
| ENSP00000259008 | ENSP00000369335 |
| ENSP00000259008 | ENSP00000382562 |
| ENSP00000259008 | ENSP00000388872 |
| ENSP00000259008 | ENSP00000406490 |
| ENSP00000259050 | ENSP00000261942 |
| ENSP00000259050 | ENSP00000263202 |
| ENSP00000259050 | ENSP00000264515 |
| ENSP00000259050 | ENSP00000273064 |
| ENSP00000259050 | ENSP00000288199 |
| ENSP00000259050 | ENSP00000295066 |
| ENSP00000259050 | ENSP00000304370 |
| ENSP00000259050 | ENSP00000315791 |
| ENSP00000259050 | ENSP00000331487 |
| ENSP00000259050 | ENSP00000343535 |
| ENSP00000259050 | ENSP00000357998 |
| ENSP00000259050 | ENSP00000360916 |
| ENSP00000259050 | ENSP00000379457 |
| ENSP00000259050 | ENSP00000383719 |
| ENSP00000259075 | ENSP00000262294 |
| ENSP00000259075 | ENSP00000309871 |
| ENSP00000259075 | ENSP00000325376 |
| ENSP00000259075 | ENSP00000325448 |
| ENSP00000259075 | ENSP00000329411 |
| ENSP00000259075 | ENSP00000329967 |
| ENSP00000259075 | ENSP00000343535 |
| ENSP00000259075 | ENSP00000344668 |
| ENSP00000259075 | ENSP00000347504 |
| ENSP00000259075 | ENSP00000351813 |

|                 |                 |
|-----------------|-----------------|
| ENSP00000259075 | ENSP00000352522 |
| ENSP00000259075 | ENSP00000364794 |
| ENSP00000259075 | ENSP00000377954 |
| ENSP00000259154 | ENSP00000261758 |
| ENSP00000259154 | ENSP00000262265 |
| ENSP00000259154 | ENSP00000263966 |
| ENSP00000259154 | ENSP00000264705 |
| ENSP00000259154 | ENSP00000265970 |
| ENSP00000259154 | ENSP00000280350 |
| ENSP00000259154 | ENSP00000280772 |
| ENSP00000259154 | ENSP00000283195 |
| ENSP00000259154 | ENSP00000298292 |
| ENSP00000259154 | ENSP00000304102 |
| ENSP00000259154 | ENSP00000311766 |
| ENSP00000259154 | ENSP00000317790 |
| ENSP00000259154 | ENSP00000325690 |
| ENSP00000259154 | ENSP00000348163 |
| ENSP00000259154 | ENSP00000361824 |
| ENSP00000259154 | ENSP00000380921 |
| ENSP00000259206 | ENSP00000300086 |
| ENSP00000259206 | ENSP00000330959 |
| ENSP00000259206 | ENSP00000350249 |
| ENSP00000259229 | ENSP00000371994 |
| ENSP00000259235 | ENSP00000262306 |
| ENSP00000259235 | ENSP00000264183 |
| ENSP00000259235 | ENSP00000268058 |
| ENSP00000259235 | ENSP00000299424 |
| ENSP00000259235 | ENSP00000335321 |
| ENSP00000259235 | ENSP00000340271 |
| ENSP00000259235 | ENSP00000342755 |
| ENSP00000259235 | ENSP00000350512 |
| ENSP00000259235 | ENSP00000353622 |
| ENSP00000259235 | ENSP00000358605 |
| ENSP00000259235 | ENSP00000360515 |
| ENSP00000259235 | ENSP00000368801 |
| ENSP00000259235 | ENSP00000386161 |
| ENSP00000259235 | ENSP00000417281 |
| ENSP00000259253 | ENSP00000262764 |
| ENSP00000259253 | ENSP00000264065 |
| ENSP00000259253 | ENSP00000272227 |
| ENSP00000259253 | ENSP00000280700 |
| ENSP00000259253 | ENSP00000286091 |
| ENSP00000259253 | ENSP00000295770 |
| ENSP00000259253 | ENSP00000297625 |
| ENSP00000259253 | ENSP00000307491 |
| ENSP00000259253 | ENSP00000317177 |

|                 |                 |
|-----------------|-----------------|
| ENSP00000259253 | ENSP00000329466 |
| ENSP00000259253 | ENSP00000336702 |
| ENSP00000259253 | ENSP00000340466 |
| ENSP00000259253 | ENSP00000342793 |
| ENSP00000259253 | ENSP00000347948 |
| ENSP00000259253 | ENSP00000351075 |
| ENSP00000259253 | ENSP00000356807 |
| ENSP00000259253 | ENSP00000360149 |
| ENSP00000259253 | ENSP00000364893 |
| ENSP00000259396 | ENSP00000263368 |
| ENSP00000259396 | ENSP00000264731 |
| ENSP00000259396 | ENSP00000277865 |
| ENSP00000259396 | ENSP00000295897 |
| ENSP00000259396 | ENSP00000303148 |
| ENSP00000259396 | ENSP00000312584 |
| ENSP00000259396 | ENSP00000381891 |
| ENSP00000259400 | ENSP00000261531 |
| ENSP00000259400 | ENSP00000263897 |
| ENSP00000259400 | ENSP00000269122 |
| ENSP00000259400 | ENSP00000272322 |
| ENSP00000259400 | ENSP00000286448 |
| ENSP00000259400 | ENSP00000294179 |
| ENSP00000259400 | ENSP00000303191 |
| ENSP00000259400 | ENSP00000305255 |
| ENSP00000259400 | ENSP00000305810 |
| ENSP00000259400 | ENSP00000309457 |
| ENSP00000259400 | ENSP00000310521 |
| ENSP00000259400 | ENSP00000317714 |
| ENSP00000259400 | ENSP00000326534 |
| ENSP00000259400 | ENSP00000326921 |
| ENSP00000259400 | ENSP00000327650 |
| ENSP00000259400 | ENSP00000331201 |
| ENSP00000259400 | ENSP00000344055 |
| ENSP00000259400 | ENSP00000347408 |
| ENSP00000259400 | ENSP00000347498 |
| ENSP00000259400 | ENSP00000352425 |
| ENSP00000259400 | ENSP00000360183 |
| ENSP00000259400 | ENSP00000366225 |
| ENSP00000259400 | ENSP00000375881 |
| ENSP00000259400 | ENSP00000386759 |
| ENSP00000259400 | ENSP00000390783 |
| ENSP00000259400 | ENSP00000403397 |
| ENSP00000259400 | ENSP00000418661 |
| ENSP00000259406 | ENSP00000264335 |
| ENSP00000259406 | ENSP00000360141 |
| ENSP00000259406 | ENSP00000368699 |

|                 |                 |
|-----------------|-----------------|
| ENSP00000259406 | ENSP00000371483 |
| ENSP00000259406 | ENSP00000377496 |
| ENSP00000259457 | ENSP00000260187 |
| ENSP00000259457 | ENSP00000261712 |
| ENSP00000259457 | ENSP00000262193 |
| ENSP00000259457 | ENSP00000262966 |
| ENSP00000259457 | ENSP00000263881 |
| ENSP00000259457 | ENSP00000264639 |
| ENSP00000259457 | ENSP00000277541 |
| ENSP00000259457 | ENSP00000282050 |
| ENSP00000259457 | ENSP00000290541 |
| ENSP00000259457 | ENSP00000293362 |
| ENSP00000259457 | ENSP00000295901 |
| ENSP00000259457 | ENSP00000298852 |
| ENSP00000259457 | ENSP00000302239 |
| ENSP00000259457 | ENSP00000309474 |
| ENSP00000259457 | ENSP00000310129 |
| ENSP00000259457 | ENSP00000311505 |
| ENSP00000259457 | ENSP00000314837 |
| ENSP00000259457 | ENSP00000325919 |
| ENSP00000259457 | ENSP00000348442 |
| ENSP00000259457 | ENSP00000350708 |
| ENSP00000259457 | ENSP00000351284 |
| ENSP00000259457 | ENSP00000362334 |
| ENSP00000259457 | ENSP00000369335 |
| ENSP00000259457 | ENSP00000370222 |
| ENSP00000259457 | ENSP00000384211 |
| ENSP00000259457 | ENSP00000396937 |
| ENSP00000259457 | ENSP00000403852 |
| ENSP00000259457 | ENSP00000413632 |
| ENSP00000259457 | ENSP00000418734 |
| ENSP00000259467 | ENSP00000312262 |
| ENSP00000259467 | ENSP00000317334 |
| ENSP00000259467 | ENSP00000363021 |
| ENSP00000259469 | ENSP00000260102 |
| ENSP00000259469 | ENSP00000260443 |
| ENSP00000259469 | ENSP00000261015 |
| ENSP00000259469 | ENSP00000262584 |
| ENSP00000259469 | ENSP00000263073 |
| ENSP00000259469 | ENSP00000263208 |
| ENSP00000259469 | ENSP00000264995 |
| ENSP00000259469 | ENSP00000265100 |
| ENSP00000259469 | ENSP00000265245 |
| ENSP00000259469 | ENSP00000268206 |
| ENSP00000259469 | ENSP00000268616 |
| ENSP00000259469 | ENSP00000268661 |

|                 |                 |
|-----------------|-----------------|
| ENSP00000259469 | ENSP00000269499 |
| ENSP00000259469 | ENSP00000274242 |
| ENSP00000259469 | ENSP00000274606 |
| ENSP00000259469 | ENSP00000278856 |
| ENSP00000259469 | ENSP00000287038 |
| ENSP00000259469 | ENSP00000288937 |
| ENSP00000259469 | ENSP00000294189 |
| ENSP00000259469 | ENSP00000296411 |
| ENSP00000259469 | ENSP00000296674 |
| ENSP00000259469 | ENSP00000296802 |
| ENSP00000259469 | ENSP00000296805 |
| ENSP00000259469 | ENSP00000297908 |
| ENSP00000259469 | ENSP00000298283 |
| ENSP00000259469 | ENSP00000300151 |
| ENSP00000259469 | ENSP00000302886 |
| ENSP00000259469 | ENSP00000304903 |
| ENSP00000259469 | ENSP00000306548 |
| ENSP00000259469 | ENSP00000307889 |
| ENSP00000259469 | ENSP00000308897 |
| ENSP00000259469 | ENSP00000309334 |
| ENSP00000259469 | ENSP00000309433 |
| ENSP00000259469 | ENSP00000309830 |
| ENSP00000259469 | ENSP00000311028 |
| ENSP00000259469 | ENSP00000311430 |
| ENSP00000259469 | ENSP00000317376 |
| ENSP00000259469 | ENSP00000322419 |
| ENSP00000259469 | ENSP00000325312 |
| ENSP00000259469 | ENSP00000337839 |
| ENSP00000259469 | ENSP00000338862 |
| ENSP00000259469 | ENSP00000339095 |
| ENSP00000259469 | ENSP00000339795 |
| ENSP00000259469 | ENSP00000340766 |
| ENSP00000259469 | ENSP00000341082 |
| ENSP00000259469 | ENSP00000341538 |
| ENSP00000259469 | ENSP00000343392 |
| ENSP00000259469 | ENSP00000345156 |
| ENSP00000259469 | ENSP00000346015 |
| ENSP00000259469 | ENSP00000346022 |
| ENSP00000259469 | ENSP00000346027 |
| ENSP00000259469 | ENSP00000346037 |
| ENSP00000259469 | ENSP00000346050 |
| ENSP00000259469 | ENSP00000346088 |
| ENSP00000259469 | ENSP00000352021 |
| ENSP00000259469 | ENSP00000353998 |
| ENSP00000259469 | ENSP00000354040 |
| ENSP00000259469 | ENSP00000354525 |

|                 |                 |
|-----------------|-----------------|
| ENSP00000259469 | ENSP00000354739 |
| ENSP00000259469 | ENSP00000355261 |
| ENSP00000259469 | ENSP00000357998 |
| ENSP00000259469 | ENSP00000359345 |
| ENSP00000259469 | ENSP00000361076 |
| ENSP00000259469 | ENSP00000362306 |
| ENSP00000259469 | ENSP00000362744 |
| ENSP00000259469 | ENSP00000363018 |
| ENSP00000259469 | ENSP00000363384 |
| ENSP00000259469 | ENSP00000363676 |
| ENSP00000259469 | ENSP00000363944 |
| ENSP00000259469 | ENSP00000364320 |
| ENSP00000259469 | ENSP00000369757 |
| ENSP00000259469 | ENSP00000369965 |
| ENSP00000259469 | ENSP00000373404 |
| ENSP00000259469 | ENSP00000375730 |
| ENSP00000259469 | ENSP00000377486 |
| ENSP00000259469 | ENSP00000377640 |
| ENSP00000259469 | ENSP00000377865 |
| ENSP00000259469 | ENSP00000378160 |
| ENSP00000259469 | ENSP00000379607 |
| ENSP00000259469 | ENSP00000379888 |
| ENSP00000259469 | ENSP00000380156 |
| ENSP00000259469 | ENSP00000386717 |
| ENSP00000259469 | ENSP00000388330 |
| ENSP00000259469 | ENSP00000389103 |
| ENSP00000259469 | ENSP00000391723 |
| ENSP00000259469 | ENSP00000393393 |
| ENSP00000259469 | ENSP00000402338 |
| ENSP00000259469 | ENSP00000414321 |
| ENSP00000259469 | ENSP00000417763 |
| ENSP00000259469 | ENSP00000419370 |
| ENSP00000259477 | ENSP00000295685 |
| ENSP00000259477 | ENSP00000317334 |
| ENSP00000259477 | ENSP00000320924 |
| ENSP00000259477 | ENSP00000325448 |
| ENSP00000259477 | ENSP00000326238 |
| ENSP00000259477 | ENSP00000348163 |
| ENSP00000259477 | ENSP00000352802 |
| ENSP00000259477 | ENSP00000365147 |
| ENSP00000259477 | ENSP00000365891 |
| ENSP00000259477 | ENSP00000376946 |
| ENSP00000259477 | ENSP00000380431 |
| ENSP00000259477 | ENSP00000386878 |
| ENSP00000259512 | ENSP00000261534 |
| ENSP00000259512 | ENSP00000261942 |



|                 |                 |
|-----------------|-----------------|
| ENSP00000259512 | ENSP00000263202 |
| ENSP00000259512 | ENSP00000263228 |
| ENSP00000259512 | ENSP00000272638 |
| ENSP00000259512 | ENSP00000273067 |
| ENSP00000259512 | ENSP00000274140 |
| ENSP00000259512 | ENSP00000290158 |
| ENSP00000259512 | ENSP00000290649 |
| ENSP00000259512 | ENSP00000294119 |
| ENSP00000259512 | ENSP00000295897 |
| ENSP00000259512 | ENSP00000296350 |
| ENSP00000259512 | ENSP00000305810 |
| ENSP00000259512 | ENSP00000309141 |
| ENSP00000259512 | ENSP00000312506 |
| ENSP00000259512 | ENSP00000317087 |
| ENSP00000259512 | ENSP00000326813 |
| ENSP00000259512 | ENSP00000331487 |
| ENSP00000259512 | ENSP00000337053 |
| ENSP00000259512 | ENSP00000346130 |
| ENSP00000259512 | ENSP00000347140 |
| ENSP00000259512 | ENSP00000349970 |
| ENSP00000259512 | ENSP00000366395 |
| ENSP00000259512 | ENSP00000381282 |
| ENSP00000259512 | ENSP00000392330 |
| ENSP00000259512 | ENSP00000401445 |
| ENSP00000259569 | ENSP00000261396 |
| ENSP00000259569 | ENSP00000261741 |
| ENSP00000259569 | ENSP00000262193 |
| ENSP00000259569 | ENSP00000262554 |
| ENSP00000259569 | ENSP00000262765 |
| ENSP00000259569 | ENSP00000262982 |
| ENSP00000259569 | ENSP00000264883 |
| ENSP00000259569 | ENSP00000265351 |
| ENSP00000259569 | ENSP00000268379 |
| ENSP00000259569 | ENSP00000269980 |
| ENSP00000259569 | ENSP00000273398 |
| ENSP00000259569 | ENSP00000273962 |
| ENSP00000259569 | ENSP00000280346 |
| ENSP00000259569 | ENSP00000283195 |
| ENSP00000259569 | ENSP00000283875 |
| ENSP00000259569 | ENSP00000287675 |
| ENSP00000259569 | ENSP00000290158 |
| ENSP00000259569 | ENSP00000296257 |
| ENSP00000259569 | ENSP00000296411 |
| ENSP00000259569 | ENSP00000296802 |
| ENSP00000259569 | ENSP00000297579 |
| ENSP00000259569 | ENSP00000300648 |

|                 |                 |
|-----------------|-----------------|
| ENSP00000259569 | ENSP00000302768 |
| ENSP00000259569 | ENSP00000302886 |
| ENSP00000259569 | ENSP00000306983 |
| ENSP00000259569 | ENSP00000307272 |
| ENSP00000259569 | ENSP00000307889 |
| ENSP00000259569 | ENSP00000309433 |
| ENSP00000259569 | ENSP00000310042 |
| ENSP00000259569 | ENSP00000310668 |
| ENSP00000259569 | ENSP00000312356 |
| ENSP00000259569 | ENSP00000313953 |
| ENSP00000259569 | ENSP00000316879 |
| ENSP00000259569 | ENSP00000318195 |
| ENSP00000259569 | ENSP00000318351 |
| ENSP00000259569 | ENSP00000318977 |
| ENSP00000259569 | ENSP00000325312 |
| ENSP00000259569 | ENSP00000327197 |
| ENSP00000259569 | ENSP00000331817 |
| ENSP00000259569 | ENSP00000332444 |
| ENSP00000259569 | ENSP00000336712 |
| ENSP00000259569 | ENSP00000338573 |
| ENSP00000259569 | ENSP00000340281 |
| ENSP00000259569 | ENSP00000340823 |
| ENSP00000259569 | ENSP00000343701 |
| ENSP00000259569 | ENSP00000344460 |
| ENSP00000259569 | ENSP00000346050 |
| ENSP00000259569 | ENSP00000346566 |
| ENSP00000259569 | ENSP00000350967 |
| ENSP00000259569 | ENSP00000353741 |
| ENSP00000259569 | ENSP00000354720 |
| ENSP00000259569 | ENSP00000354742 |
| ENSP00000259569 | ENSP00000354812 |
| ENSP00000259569 | ENSP00000354957 |
| ENSP00000259569 | ENSP00000357748 |
| ENSP00000259569 | ENSP00000359000 |
| ENSP00000259569 | ENSP00000359305 |
| ENSP00000259569 | ENSP00000360031 |
| ENSP00000259569 | ENSP00000360286 |
| ENSP00000259569 | ENSP00000361949 |
| ENSP00000259569 | ENSP00000362900 |
| ENSP00000259569 | ENSP00000363779 |
| ENSP00000259569 | ENSP00000365811 |
| ENSP00000259569 | ENSP00000369042 |
| ENSP00000259569 | ENSP00000369695 |
| ENSP00000259569 | ENSP00000370589 |
| ENSP00000259569 | ENSP00000372689 |
| ENSP00000259569 | ENSP00000376309 |

|                 |                 |
|-----------------|-----------------|
| ENSP00000259569 | ENSP00000377655 |
| ENSP00000259569 | ENSP00000377865 |
| ENSP00000259569 | ENSP00000379888 |
| ENSP00000259569 | ENSP00000386992 |
| ENSP00000259569 | ENSP00000389103 |
| ENSP00000259569 | ENSP00000394382 |
| ENSP00000259569 | ENSP00000394791 |
| ENSP00000259569 | ENSP00000401371 |
| ENSP00000259569 | ENSP00000402527 |
| ENSP00000259605 | ENSP00000264731 |
| ENSP00000259605 | ENSP00000272645 |
| ENSP00000259605 | ENSP00000312735 |
| ENSP00000259605 | ENSP00000324124 |
| ENSP00000259605 | ENSP00000347836 |
| ENSP00000259605 | ENSP00000355028 |
| ENSP00000259605 | ENSP00000403852 |
| ENSP00000259607 | ENSP00000265077 |
| ENSP00000259607 | ENSP00000286758 |
| ENSP00000259608 | ENSP00000340944 |
| ENSP00000259608 | ENSP00000364898 |
| ENSP00000259632 | ENSP00000354791 |
| ENSP00000259632 | ENSP00000408910 |
| ENSP00000259632 | ENSP00000414906 |
| ENSP00000259633 | ENSP00000342681 |
| ENSP00000259633 | ENSP00000364898 |
| ENSP00000259667 | ENSP00000261245 |
| ENSP00000259667 | ENSP00000301729 |
| ENSP00000259667 | ENSP00000302886 |
| ENSP00000259667 | ENSP00000336702 |
| ENSP00000259667 | ENSP00000356652 |
| ENSP00000259667 | ENSP00000357880 |
| ENSP00000259726 | ENSP00000294008 |
| ENSP00000259750 | ENSP00000260102 |
| ENSP00000259750 | ENSP00000260643 |
| ENSP00000259750 | ENSP00000262544 |
| ENSP00000259750 | ENSP00000263657 |
| ENSP00000259750 | ENSP00000263791 |
| ENSP00000259750 | ENSP00000268802 |
| ENSP00000259750 | ENSP00000278572 |
| ENSP00000259750 | ENSP00000283109 |
| ENSP00000259750 | ENSP00000285968 |
| ENSP00000259750 | ENSP00000297338 |
| ENSP00000259750 | ENSP00000301364 |
| ENSP00000259750 | ENSP00000308699 |
| ENSP00000259750 | ENSP00000331817 |
| ENSP00000259750 | ENSP00000349016 |

|                 |                 |
|-----------------|-----------------|
| ENSP00000259750 | ENSP00000353508 |
| ENSP00000259750 | ENSP00000354720 |
| ENSP00000259750 | ENSP00000355471 |
| ENSP00000259750 | ENSP00000355541 |
| ENSP00000259750 | ENSP00000356548 |
| ENSP00000259750 | ENSP00000360676 |
| ENSP00000259750 | ENSP00000363559 |
| ENSP00000259750 | ENSP00000363779 |
| ENSP00000259751 | ENSP00000345731 |
| ENSP00000259782 | ENSP00000276603 |
| ENSP00000259803 | ENSP00000262367 |
| ENSP00000259803 | ENSP00000368805 |
| ENSP00000259803 | ENSP00000394791 |
| ENSP00000259806 | ENSP00000297689 |
| ENSP00000259806 | ENSP00000359531 |
| ENSP00000259808 | ENSP00000260187 |
| ENSP00000259808 | ENSP00000263036 |
| ENSP00000259808 | ENSP00000263056 |
| ENSP00000259808 | ENSP00000286186 |
| ENSP00000259808 | ENSP00000300589 |
| ENSP00000259808 | ENSP00000301838 |
| ENSP00000259808 | ENSP00000313829 |
| ENSP00000259808 | ENSP00000321503 |
| ENSP00000259808 | ENSP00000327647 |
| ENSP00000259808 | ENSP00000337797 |
| ENSP00000259808 | ENSP00000340305 |
| ENSP00000259808 | ENSP00000341189 |
| ENSP00000259808 | ENSP00000341268 |
| ENSP00000259808 | ENSP00000343313 |
| ENSP00000259808 | ENSP00000347979 |
| ENSP00000259808 | ENSP00000348632 |
| ENSP00000259808 | ENSP00000354927 |
| ENSP00000259808 | ENSP00000358335 |
| ENSP00000259808 | ENSP00000360215 |
| ENSP00000259808 | ENSP00000363089 |
| ENSP00000259808 | ENSP00000369100 |
| ENSP00000259808 | ENSP00000374455 |
| ENSP00000259808 | ENSP00000374552 |
| ENSP00000259808 | ENSP00000376250 |
| ENSP00000259808 | ENSP00000379612 |
| ENSP00000259845 | ENSP00000301607 |
| ENSP00000259873 | ENSP00000381031 |
| ENSP00000259874 | ENSP00000297156 |
| ENSP00000259874 | ENSP00000358022 |
| ENSP00000259895 | ENSP00000261245 |
| ENSP00000259895 | ENSP00000265963 |

|                 |                 |
|-----------------|-----------------|
| ENSP00000259895 | ENSP00000265990 |
| ENSP00000259895 | ENSP00000282892 |
| ENSP00000259895 | ENSP00000283875 |
| ENSP00000259895 | ENSP00000285021 |
| ENSP00000259895 | ENSP00000285398 |
| ENSP00000259895 | ENSP00000314949 |
| ENSP00000259895 | ENSP00000347978 |
| ENSP00000259895 | ENSP00000348168 |
| ENSP00000259895 | ENSP00000350283 |
| ENSP00000259895 | ENSP00000350708 |
| ENSP00000259895 | ENSP00000359531 |
| ENSP00000259895 | ENSP00000375809 |
| ENSP00000259895 | ENSP00000377969 |
| ENSP00000259895 | ENSP00000396251 |
| ENSP00000259963 | ENSP00000337053 |
| ENSP00000259963 | ENSP00000366395 |
| ENSP00000260008 | ENSP00000260526 |
| ENSP00000260008 | ENSP00000262300 |
| ENSP00000260008 | ENSP00000263773 |
| ENSP00000260008 | ENSP00000281282 |
| ENSP00000260008 | ENSP00000303507 |
| ENSP00000260008 | ENSP00000322170 |
| ENSP00000260008 | ENSP00000322608 |
| ENSP00000260008 | ENSP00000322957 |
| ENSP00000260008 | ENSP00000332592 |
| ENSP00000260008 | ENSP00000348349 |
| ENSP00000260008 | ENSP00000351333 |
| ENSP00000260008 | ENSP00000360076 |
| ENSP00000260008 | ENSP00000360183 |
| ENSP00000260008 | ENSP00000365891 |
| ENSP00000260008 | ENSP00000366121 |
| ENSP00000260008 | ENSP00000370589 |
| ENSP00000260008 | ENSP00000377793 |
| ENSP00000260008 | ENSP00000380450 |
| ENSP00000260008 | ENSP00000381567 |
| ENSP00000260008 | ENSP00000391249 |
| ENSP00000260008 | ENSP00000397598 |
| ENSP00000260008 | ENSP00000402084 |
| ENSP00000260008 | ENSP00000407879 |
| ENSP00000260045 | ENSP00000350512 |
| ENSP00000260049 | ENSP00000263326 |
| ENSP00000260049 | ENSP00000280357 |
| ENSP00000260102 | ENSP00000260443 |
| ENSP00000260102 | ENSP00000261637 |
| ENSP00000260102 | ENSP00000262584 |
| ENSP00000260102 | ENSP00000263657 |

|                 |                 |
|-----------------|-----------------|
| ENSP00000260102 | ENSP00000263857 |
| ENSP00000260102 | ENSP00000264028 |
| ENSP00000260102 | ENSP00000264670 |
| ENSP00000260102 | ENSP00000264995 |
| ENSP00000260102 | ENSP00000265100 |
| ENSP00000260102 | ENSP00000268206 |
| ENSP00000260102 | ENSP00000268661 |
| ENSP00000260102 | ENSP00000272418 |
| ENSP00000260102 | ENSP00000274242 |
| ENSP00000260102 | ENSP00000274606 |
| ENSP00000260102 | ENSP00000278572 |
| ENSP00000260102 | ENSP00000279242 |
| ENSP00000260102 | ENSP00000287038 |
| ENSP00000260102 | ENSP00000288937 |
| ENSP00000260102 | ENSP00000294008 |
| ENSP00000260102 | ENSP00000294189 |
| ENSP00000260102 | ENSP00000296102 |
| ENSP00000260102 | ENSP00000296411 |
| ENSP00000260102 | ENSP00000296674 |
| ENSP00000260102 | ENSP00000296802 |
| ENSP00000260102 | ENSP00000296805 |
| ENSP00000260102 | ENSP00000297908 |
| ENSP00000260102 | ENSP00000298283 |
| ENSP00000260102 | ENSP00000300151 |
| ENSP00000260102 | ENSP00000301585 |
| ENSP00000260102 | ENSP00000302886 |
| ENSP00000260102 | ENSP00000302896 |
| ENSP00000260102 | ENSP00000306080 |
| ENSP00000260102 | ENSP00000306548 |
| ENSP00000260102 | ENSP00000307889 |
| ENSP00000260102 | ENSP00000308275 |
| ENSP00000260102 | ENSP00000308897 |
| ENSP00000260102 | ENSP00000309334 |
| ENSP00000260102 | ENSP00000309830 |
| ENSP00000260102 | ENSP00000311028 |
| ENSP00000260102 | ENSP00000311430 |
| ENSP00000260102 | ENSP00000312311 |
| ENSP00000260102 | ENSP00000312735 |
| ENSP00000260102 | ENSP00000314949 |
| ENSP00000260102 | ENSP00000315017 |
| ENSP00000260102 | ENSP00000317376 |
| ENSP00000260102 | ENSP00000318646 |
| ENSP00000260102 | ENSP00000322396 |
| ENSP00000260102 | ENSP00000322419 |
| ENSP00000260102 | ENSP00000325312 |
| ENSP00000260102 | ENSP00000326981 |

|                 |                 |
|-----------------|-----------------|
| ENSP00000260102 | ENSP00000328079 |
| ENSP00000260102 | ENSP00000329419 |
| ENSP00000260102 | ENSP00000333401 |
| ENSP00000260102 | ENSP00000338573 |
| ENSP00000260102 | ENSP00000339095 |
| ENSP00000260102 | ENSP00000339145 |
| ENSP00000260102 | ENSP00000339723 |
| ENSP00000260102 | ENSP00000339795 |
| ENSP00000260102 | ENSP00000339845 |
| ENSP00000260102 | ENSP00000341082 |
| ENSP00000260102 | ENSP00000341885 |
| ENSP00000260102 | ENSP00000342381 |
| ENSP00000260102 | ENSP00000343392 |
| ENSP00000260102 | ENSP00000343745 |
| ENSP00000260102 | ENSP00000345156 |
| ENSP00000260102 | ENSP00000346022 |
| ENSP00000260102 | ENSP00000346027 |
| ENSP00000260102 | ENSP00000346037 |
| ENSP00000260102 | ENSP00000346050 |
| ENSP00000260102 | ENSP00000346088 |
| ENSP00000260102 | ENSP00000346725 |
| ENSP00000260102 | ENSP00000354040 |
| ENSP00000260102 | ENSP00000354525 |
| ENSP00000260102 | ENSP00000354739 |
| ENSP00000260102 | ENSP00000357048 |
| ENSP00000260102 | ENSP00000359345 |
| ENSP00000260102 | ENSP00000360031 |
| ENSP00000260102 | ENSP00000360498 |
| ENSP00000260102 | ENSP00000361076 |
| ENSP00000260102 | ENSP00000362153 |
| ENSP00000260102 | ENSP00000362744 |
| ENSP00000260102 | ENSP00000363018 |
| ENSP00000260102 | ENSP00000363384 |
| ENSP00000260102 | ENSP00000363676 |
| ENSP00000260102 | ENSP00000364320 |
| ENSP00000260102 | ENSP00000369757 |
| ENSP00000260102 | ENSP00000370930 |
| ENSP00000260102 | ENSP00000373404 |
| ENSP00000260102 | ENSP00000375730 |
| ENSP00000260102 | ENSP00000377486 |
| ENSP00000260102 | ENSP00000377640 |
| ENSP00000260102 | ENSP00000377865 |
| ENSP00000260102 | ENSP00000378160 |
| ENSP00000260102 | ENSP00000379607 |
| ENSP00000260102 | ENSP00000379888 |
| ENSP00000260102 | ENSP00000380156 |

|                 |                 |
|-----------------|-----------------|
| ENSP00000260102 | ENSP00000386717 |
| ENSP00000260102 | ENSP00000389103 |
| ENSP00000260102 | ENSP00000391723 |
| ENSP00000260102 | ENSP00000393393 |
| ENSP00000260102 | ENSP00000402338 |
| ENSP00000260102 | ENSP00000414321 |
| ENSP00000260102 | ENSP00000417602 |
| ENSP00000260102 | ENSP00000419740 |
| ENSP00000260118 | ENSP00000273398 |
| ENSP00000260126 | ENSP00000379607 |
| ENSP00000260129 | ENSP00000260210 |
| ENSP00000260129 | ENSP00000260803 |
| ENSP00000260129 | ENSP00000262133 |
| ENSP00000260129 | ENSP00000262367 |
| ENSP00000260129 | ENSP00000262518 |
| ENSP00000260129 | ENSP00000263360 |
| ENSP00000260129 | ENSP00000264951 |
| ENSP00000260129 | ENSP00000286317 |
| ENSP00000260129 | ENSP00000287936 |
| ENSP00000260129 | ENSP00000291688 |
| ENSP00000260129 | ENSP00000296577 |
| ENSP00000260129 | ENSP00000298746 |
| ENSP00000260129 | ENSP00000300146 |
| ENSP00000260129 | ENSP00000300648 |
| ENSP00000260129 | ENSP00000300651 |
| ENSP00000260129 | ENSP00000301740 |
| ENSP00000260129 | ENSP00000307863 |
| ENSP00000260129 | ENSP00000309433 |
| ENSP00000260129 | ENSP00000310448 |
| ENSP00000260129 | ENSP00000310596 |
| ENSP00000260129 | ENSP00000312318 |
| ENSP00000260129 | ENSP00000320566 |
| ENSP00000260129 | ENSP00000324203 |
| ENSP00000260129 | ENSP00000326806 |
| ENSP00000260129 | ENSP00000329102 |
| ENSP00000260129 | ENSP00000331879 |
| ENSP00000260129 | ENSP00000332103 |
| ENSP00000260129 | ENSP00000339090 |
| ENSP00000260129 | ENSP00000341947 |
| ENSP00000260129 | ENSP00000344241 |
| ENSP00000260129 | ENSP00000348010 |
| ENSP00000260129 | ENSP00000348107 |
| ENSP00000260129 | ENSP00000351894 |
| ENSP00000260129 | ENSP00000352257 |
| ENSP00000260129 | ENSP00000352678 |
| ENSP00000260129 | ENSP00000355205 |



|                 |                 |
|-----------------|-----------------|
| ENSP00000260129 | ENSP00000358563 |
| ENSP00000260129 | ENSP00000360515 |
| ENSP00000260129 | ENSP00000361577 |
| ENSP00000260129 | ENSP00000362592 |
| ENSP00000260129 | ENSP00000362936 |
| ENSP00000260129 | ENSP00000364289 |
| ENSP00000260129 | ENSP00000368686 |
| ENSP00000260129 | ENSP00000369042 |
| ENSP00000260129 | ENSP00000370589 |
| ENSP00000260129 | ENSP00000374213 |
| ENSP00000260129 | ENSP00000376973 |
| ENSP00000260129 | ENSP00000379888 |
| ENSP00000260129 | ENSP00000380982 |
| ENSP00000260129 | ENSP00000386134 |
| ENSP00000260129 | ENSP00000412566 |
| ENSP00000260130 | ENSP00000307046 |
| ENSP00000260130 | ENSP00000323280 |
| ENSP00000260130 | ENSP00000324560 |
| ENSP00000260130 | ENSP00000329797 |
| ENSP00000260130 | ENSP00000344666 |
| ENSP00000260130 | ENSP00000346466 |
| ENSP00000260130 | ENSP00000353154 |
| ENSP00000260130 | ENSP00000363763 |
| ENSP00000260130 | ENSP00000368698 |
| ENSP00000260130 | ENSP00000380054 |
| ENSP00000260187 | ENSP00000261601 |
| ENSP00000260187 | ENSP00000263974 |
| ENSP00000260187 | ENSP00000264515 |
| ENSP00000260187 | ENSP00000264552 |
| ENSP00000260187 | ENSP00000265562 |
| ENSP00000260187 | ENSP00000266126 |
| ENSP00000260187 | ENSP00000272645 |
| ENSP00000260187 | ENSP00000290663 |
| ENSP00000260187 | ENSP00000304592 |
| ENSP00000260187 | ENSP00000307387 |
| ENSP00000260187 | ENSP00000314420 |
| ENSP00000260187 | ENSP00000326921 |
| ENSP00000260187 | ENSP00000331201 |
| ENSP00000260187 | ENSP00000331487 |
| ENSP00000260187 | ENSP00000341268 |
| ENSP00000260187 | ENSP00000342026 |
| ENSP00000260187 | ENSP00000343535 |
| ENSP00000260187 | ENSP00000345530 |
| ENSP00000260187 | ENSP00000347301 |
| ENSP00000260187 | ENSP00000347498 |
| ENSP00000260187 | ENSP00000348442 |

|                 |                 |
|-----------------|-----------------|
| ENSP00000260187 | ENSP00000353826 |
| ENSP00000260187 | ENSP00000354673 |
| ENSP00000260187 | ENSP00000355899 |
| ENSP00000260187 | ENSP00000360899 |
| ENSP00000260187 | ENSP00000362608 |
| ENSP00000260187 | ENSP00000417281 |
| ENSP00000260197 | ENSP00000281187 |
| ENSP00000260197 | ENSP00000299138 |
| ENSP00000260197 | ENSP00000349437 |
| ENSP00000260210 | ENSP00000260363 |
| ENSP00000260210 | ENSP00000261531 |
| ENSP00000260210 | ENSP00000262518 |
| ENSP00000260210 | ENSP00000263576 |
| ENSP00000260210 | ENSP00000264233 |
| ENSP00000260210 | ENSP00000266529 |
| ENSP00000260210 | ENSP00000267812 |
| ENSP00000260210 | ENSP00000268482 |
| ENSP00000260210 | ENSP00000276201 |
| ENSP00000260210 | ENSP00000291688 |
| ENSP00000260210 | ENSP00000295488 |
| ENSP00000260210 | ENSP00000296215 |
| ENSP00000260210 | ENSP00000296702 |
| ENSP00000260210 | ENSP00000297151 |
| ENSP00000260210 | ENSP00000298532 |
| ENSP00000260210 | ENSP00000300146 |
| ENSP00000260210 | ENSP00000300413 |
| ENSP00000260210 | ENSP00000301740 |
| ENSP00000260210 | ENSP00000302160 |
| ENSP00000260210 | ENSP00000303191 |
| ENSP00000260210 | ENSP00000304370 |
| ENSP00000260210 | ENSP00000304593 |
| ENSP00000260210 | ENSP00000304903 |
| ENSP00000260210 | ENSP00000305924 |
| ENSP00000260210 | ENSP00000307260 |
| ENSP00000260210 | ENSP00000307863 |
| ENSP00000260210 | ENSP00000310448 |
| ENSP00000260210 | ENSP00000310596 |
| ENSP00000260210 | ENSP00000310723 |
| ENSP00000260210 | ENSP00000311344 |
| ENSP00000260210 | ENSP00000313829 |
| ENSP00000260210 | ENSP00000318861 |
| ENSP00000260210 | ENSP00000324203 |
| ENSP00000260210 | ENSP00000326806 |
| ENSP00000260210 | ENSP00000327716 |
| ENSP00000260210 | ENSP00000332103 |
| ENSP00000260210 | ENSP00000334148 |

|                 |                 |
|-----------------|-----------------|
| ENSP00000260210 | ENSP00000335321 |
| ENSP00000260210 | ENSP00000339090 |
| ENSP00000260210 | ENSP00000342374 |
| ENSP00000260210 | ENSP00000346986 |
| ENSP00000260210 | ENSP00000348107 |
| ENSP00000260210 | ENSP00000351492 |
| ENSP00000260210 | ENSP00000354951 |
| ENSP00000260210 | ENSP00000355205 |
| ENSP00000260210 | ENSP00000356405 |
| ENSP00000260210 | ENSP00000357631 |
| ENSP00000260210 | ENSP00000358854 |
| ENSP00000260210 | ENSP00000359454 |
| ENSP00000260210 | ENSP00000360286 |
| ENSP00000260210 | ENSP00000360532 |
| ENSP00000260210 | ENSP00000361577 |
| ENSP00000260210 | ENSP00000362532 |
| ENSP00000260210 | ENSP00000362936 |
| ENSP00000260210 | ENSP00000364813 |
| ENSP00000260210 | ENSP00000366135 |
| ENSP00000260210 | ENSP00000366557 |
| ENSP00000260210 | ENSP00000366607 |
| ENSP00000260210 | ENSP00000366843 |
| ENSP00000260210 | ENSP00000368755 |
| ENSP00000260210 | ENSP00000374213 |
| ENSP00000260210 | ENSP00000376973 |
| ENSP00000260210 | ENSP00000377262 |
| ENSP00000260210 | ENSP00000380460 |
| ENSP00000260210 | ENSP00000381198 |
| ENSP00000260210 | ENSP00000383402 |
| ENSP00000260210 | ENSP00000386759 |
| ENSP00000260210 | ENSP00000402240 |
| ENSP00000260210 | ENSP00000404151 |
| ENSP00000260210 | ENSP00000410758 |
| ENSP00000260210 | ENSP00000412566 |
| ENSP00000260210 | ENSP00000414006 |
| ENSP00000260210 | ENSP00000414634 |
| ENSP00000260257 | ENSP00000260443 |
| ENSP00000260257 | ENSP00000262027 |
| ENSP00000260257 | ENSP00000263629 |
| ENSP00000260257 | ENSP00000274353 |
| ENSP00000260257 | ENSP00000281828 |
| ENSP00000260257 | ENSP00000298569 |
| ENSP00000260257 | ENSP00000302114 |
| ENSP00000260257 | ENSP00000302801 |
| ENSP00000260257 | ENSP00000303279 |
| ENSP00000260257 | ENSP00000335675 |

|                 |                 |
|-----------------|-----------------|
| ENSP00000260257 | ENSP00000340093 |
| ENSP00000260257 | ENSP00000341543 |
| ENSP00000260257 | ENSP00000344241 |
| ENSP00000260257 | ENSP00000348107 |
| ENSP00000260257 | ENSP00000350967 |
| ENSP00000260257 | ENSP00000351380 |
| ENSP00000260257 | ENSP00000354204 |
| ENSP00000260257 | ENSP00000356329 |
| ENSP00000260257 | ENSP00000356405 |
| ENSP00000260257 | ENSP00000356548 |
| ENSP00000260257 | ENSP00000360286 |
| ENSP00000260257 | ENSP00000362576 |
| ENSP00000260257 | ENSP00000364794 |
| ENSP00000260257 | ENSP00000367029 |
| ENSP00000260257 | ENSP00000367498 |
| ENSP00000260257 | ENSP00000368140 |
| ENSP00000260257 | ENSP00000370083 |
| ENSP00000260257 | ENSP00000370119 |
| ENSP00000260257 | ENSP00000370377 |
| ENSP00000260257 | ENSP00000370607 |
| ENSP00000260257 | ENSP00000374399 |
| ENSP00000260257 | ENSP00000394085 |
| ENSP00000260270 | ENSP00000293195 |
| ENSP00000260270 | ENSP00000297185 |
| ENSP00000260270 | ENSP00000307786 |
| ENSP00000260270 | ENSP00000310623 |
| ENSP00000260270 | ENSP00000363205 |
| ENSP00000260323 | ENSP00000362399 |
| ENSP00000260324 | ENSP00000311505 |
| ENSP00000260327 | ENSP00000261596 |
| ENSP00000260327 | ENSP00000263857 |
| ENSP00000260327 | ENSP00000299601 |
| ENSP00000260327 | ENSP00000315693 |
| ENSP00000260327 | ENSP00000356405 |
| ENSP00000260327 | ENSP00000368066 |
| ENSP00000260327 | ENSP00000374280 |
| ENSP00000260327 | ENSP00000377769 |
| ENSP00000260361 | ENSP00000263774 |
| ENSP00000260361 | ENSP00000266544 |
| ENSP00000260361 | ENSP00000354687 |
| ENSP00000260361 | ENSP00000362058 |
| ENSP00000260361 | ENSP00000369176 |
| ENSP00000260363 | ENSP00000262305 |
| ENSP00000260363 | ENSP00000263208 |
| ENSP00000260363 | ENSP00000296137 |
| ENSP00000260363 | ENSP00000296509 |

|                 |                 |
|-----------------|-----------------|
| ENSP00000260363 | ENSP00000297338 |
| ENSP00000260363 | ENSP00000297814 |
| ENSP00000260363 | ENSP00000301332 |
| ENSP00000260363 | ENSP00000302239 |
| ENSP00000260363 | ENSP00000309871 |
| ENSP00000260363 | ENSP00000322180 |
| ENSP00000260363 | ENSP00000323858 |
| ENSP00000260363 | ENSP00000329466 |
| ENSP00000260363 | ENSP00000336868 |
| ENSP00000260363 | ENSP00000339933 |
| ENSP00000260363 | ENSP00000342181 |
| ENSP00000260363 | ENSP00000346566 |
| ENSP00000260363 | ENSP00000347719 |
| ENSP00000260363 | ENSP00000354851 |
| ENSP00000260363 | ENSP00000355090 |
| ENSP00000260363 | ENSP00000355388 |
| ENSP00000260363 | ENSP00000355560 |
| ENSP00000260363 | ENSP00000356530 |
| ENSP00000260363 | ENSP00000356989 |
| ENSP00000260363 | ENSP00000362592 |
| ENSP00000260363 | ENSP00000364119 |
| ENSP00000260363 | ENSP00000368976 |
| ENSP00000260363 | ENSP00000377793 |
| ENSP00000260363 | ENSP00000379607 |
| ENSP00000260363 | ENSP00000380921 |
| ENSP00000260363 | ENSP00000382562 |
| ENSP00000260363 | ENSP00000393596 |
| ENSP00000260372 | ENSP00000282058 |
| ENSP00000260372 | ENSP00000369871 |
| ENSP00000260382 | ENSP00000352265 |
| ENSP00000260383 | ENSP00000261965 |
| ENSP00000260383 | ENSP00000264335 |
| ENSP00000260383 | ENSP00000271643 |
| ENSP00000260383 | ENSP00000309189 |
| ENSP00000260383 | ENSP00000322957 |
| ENSP00000260383 | ENSP00000324292 |
| ENSP00000260383 | ENSP00000341213 |
| ENSP00000260383 | ENSP00000360532 |
| ENSP00000260383 | ENSP00000362532 |
| ENSP00000260383 | ENSP00000367049 |
| ENSP00000260383 | ENSP00000380921 |
| ENSP00000260383 | ENSP00000382562 |
| ENSP00000260383 | ENSP00000384391 |
| ENSP00000260383 | ENSP00000404232 |
| ENSP00000260383 | ENSP00000416097 |
| ENSP00000260385 | ENSP00000313059 |

|                 |                 |
|-----------------|-----------------|
| ENSP00000260385 | ENSP00000345656 |
| ENSP00000260385 | ENSP00000414996 |
| ENSP00000260403 | ENSP00000260731 |
| ENSP00000260403 | ENSP00000262982 |
| ENSP00000260403 | ENSP00000301764 |
| ENSP00000260403 | ENSP00000314491 |
| ENSP00000260403 | ENSP00000319918 |
| ENSP00000260403 | ENSP00000321711 |
| ENSP00000260403 | ENSP00000355388 |
| ENSP00000260403 | ENSP00000359818 |
| ENSP00000260403 | ENSP00000360310 |
| ENSP00000260403 | ENSP00000380718 |
| ENSP00000260433 | ENSP00000261507 |
| ENSP00000260433 | ENSP00000264027 |
| ENSP00000260433 | ENSP00000265896 |
| ENSP00000260433 | ENSP00000277010 |
| ENSP00000260433 | ENSP00000341662 |
| ENSP00000260433 | ENSP00000348762 |
| ENSP00000260433 | ENSP00000367910 |
| ENSP00000260442 | ENSP00000293288 |
| ENSP00000260442 | ENSP00000309103 |
| ENSP00000260442 | ENSP00000314132 |
| ENSP00000260442 | ENSP00000329623 |
| ENSP00000260442 | ENSP00000353059 |
| ENSP00000260442 | ENSP00000358022 |
| ENSP00000260442 | ENSP00000363591 |
| ENSP00000260443 | ENSP00000261015 |
| ENSP00000260443 | ENSP00000262584 |
| ENSP00000260443 | ENSP00000264230 |
| ENSP00000260443 | ENSP00000264670 |
| ENSP00000260443 | ENSP00000264995 |
| ENSP00000260443 | ENSP00000265100 |
| ENSP00000260443 | ENSP00000265245 |
| ENSP00000260443 | ENSP00000268661 |
| ENSP00000260443 | ENSP00000270538 |
| ENSP00000260443 | ENSP00000274242 |
| ENSP00000260443 | ENSP00000274606 |
| ENSP00000260443 | ENSP00000278856 |
| ENSP00000260443 | ENSP00000287038 |
| ENSP00000260443 | ENSP00000294189 |
| ENSP00000260443 | ENSP00000296674 |
| ENSP00000260443 | ENSP00000296802 |
| ENSP00000260443 | ENSP00000298283 |
| ENSP00000260443 | ENSP00000300151 |
| ENSP00000260443 | ENSP00000302886 |
| ENSP00000260443 | ENSP00000302896 |

|                 |                 |
|-----------------|-----------------|
| ENSP00000260443 | ENSP00000305702 |
| ENSP00000260443 | ENSP00000306548 |
| ENSP00000260443 | ENSP00000307525 |
| ENSP00000260443 | ENSP00000307889 |
| ENSP00000260443 | ENSP00000308897 |
| ENSP00000260443 | ENSP00000309334 |
| ENSP00000260443 | ENSP00000309830 |
| ENSP00000260443 | ENSP00000310042 |
| ENSP00000260443 | ENSP00000311028 |
| ENSP00000260443 | ENSP00000311430 |
| ENSP00000260443 | ENSP00000314348 |
| ENSP00000260443 | ENSP00000317376 |
| ENSP00000260443 | ENSP00000317992 |
| ENSP00000260443 | ENSP00000322419 |
| ENSP00000260443 | ENSP00000326981 |
| ENSP00000260443 | ENSP00000328690 |
| ENSP00000260443 | ENSP00000338573 |
| ENSP00000260443 | ENSP00000338862 |
| ENSP00000260443 | ENSP00000339145 |
| ENSP00000260443 | ENSP00000339795 |
| ENSP00000260443 | ENSP00000341551 |
| ENSP00000260443 | ENSP00000343392 |
| ENSP00000260443 | ENSP00000345156 |
| ENSP00000260443 | ENSP00000345917 |
| ENSP00000260443 | ENSP00000346015 |
| ENSP00000260443 | ENSP00000346022 |
| ENSP00000260443 | ENSP00000346027 |
| ENSP00000260443 | ENSP00000346037 |
| ENSP00000260443 | ENSP00000346050 |
| ENSP00000260443 | ENSP00000346067 |
| ENSP00000260443 | ENSP00000346088 |
| ENSP00000260443 | ENSP00000346725 |
| ENSP00000260443 | ENSP00000348596 |
| ENSP00000260443 | ENSP00000351380 |
| ENSP00000260443 | ENSP00000352021 |
| ENSP00000260443 | ENSP00000353246 |
| ENSP00000260443 | ENSP00000354040 |
| ENSP00000260443 | ENSP00000354522 |
| ENSP00000260443 | ENSP00000354525 |
| ENSP00000260443 | ENSP00000354739 |
| ENSP00000260443 | ENSP00000359345 |
| ENSP00000260443 | ENSP00000359688 |
| ENSP00000260443 | ENSP00000361076 |
| ENSP00000260443 | ENSP00000362153 |
| ENSP00000260443 | ENSP00000363018 |
| ENSP00000260443 | ENSP00000363384 |

|                 |                 |
|-----------------|-----------------|
| ENSP00000260443 | ENSP00000363559 |
| ENSP00000260443 | ENSP00000363676 |
| ENSP00000260443 | ENSP00000364320 |
| ENSP00000260443 | ENSP00000365806 |
| ENSP00000260443 | ENSP00000366519 |
| ENSP00000260443 | ENSP00000368565 |
| ENSP00000260443 | ENSP00000368887 |
| ENSP00000260443 | ENSP00000369757 |
| ENSP00000260443 | ENSP00000371201 |
| ENSP00000260443 | ENSP00000373090 |
| ENSP00000260443 | ENSP00000373404 |
| ENSP00000260443 | ENSP00000375730 |
| ENSP00000260443 | ENSP00000377865 |
| ENSP00000260443 | ENSP00000378160 |
| ENSP00000260443 | ENSP00000379888 |
| ENSP00000260443 | ENSP00000380156 |
| ENSP00000260443 | ENSP00000380982 |
| ENSP00000260443 | ENSP00000382392 |
| ENSP00000260443 | ENSP00000386717 |
| ENSP00000260443 | ENSP00000388464 |
| ENSP00000260443 | ENSP00000389103 |
| ENSP00000260443 | ENSP00000393393 |
| ENSP00000260443 | ENSP00000394290 |
| ENSP00000260443 | ENSP00000402338 |
| ENSP00000260443 | ENSP00000403576 |
| ENSP00000260443 | ENSP00000409074 |
| ENSP00000260443 | ENSP00000409367 |
| ENSP00000260443 | ENSP00000411162 |
| ENSP00000260443 | ENSP00000419740 |
| ENSP00000260447 | ENSP00000378890 |
| ENSP00000260453 | ENSP00000381031 |
| ENSP00000260508 | ENSP00000356231 |
| ENSP00000260508 | ENSP00000365534 |
| ENSP00000260508 | ENSP00000379607 |
| ENSP00000260526 | ENSP00000315659 |
| ENSP00000260526 | ENSP00000316845 |
| ENSP00000260526 | ENSP00000318884 |
| ENSP00000260526 | ENSP00000327315 |
| ENSP00000260526 | ENSP00000333950 |
| ENSP00000260526 | ENSP00000361009 |
| ENSP00000260526 | ENSP00000376410 |
| ENSP00000260526 | ENSP00000384675 |
| ENSP00000260526 | ENSP00000394794 |
| ENSP00000260526 | ENSP00000397351 |
| ENSP00000260598 | ENSP00000294973 |
| ENSP00000260598 | ENSP00000304903 |



|                 |                 |
|-----------------|-----------------|
| ENSP00000260598 | ENSP00000315931 |
| ENSP00000260598 | ENSP00000333019 |
| ENSP00000260598 | ENSP00000344683 |
| ENSP00000260598 | ENSP00000354532 |
| ENSP00000260598 | ENSP00000356290 |
| ENSP00000260598 | ENSP00000412566 |
| ENSP00000260605 | ENSP00000265104 |
| ENSP00000260605 | ENSP00000348965 |
| ENSP00000260605 | ENSP00000354791 |
| ENSP00000260605 | ENSP00000358081 |
| ENSP00000260643 | ENSP00000262544 |
| ENSP00000260643 | ENSP00000262607 |
| ENSP00000260643 | ENSP00000298937 |
| ENSP00000260643 | ENSP00000308339 |
| ENSP00000260643 | ENSP00000314615 |
| ENSP00000260643 | ENSP00000341551 |
| ENSP00000260643 | ENSP00000342381 |
| ENSP00000260643 | ENSP00000350967 |
| ENSP00000260643 | ENSP00000356530 |
| ENSP00000260643 | ENSP00000357887 |
| ENSP00000260643 | ENSP00000361965 |
| ENSP00000260643 | ENSP00000363779 |
| ENSP00000260643 | ENSP00000386918 |
| ENSP00000260643 | ENSP00000401445 |
| ENSP00000260643 | ENSP00000419599 |
| ENSP00000260648 | ENSP00000373477 |
| ENSP00000260649 | ENSP00000303507 |
| ENSP00000260649 | ENSP00000320378 |
| ENSP00000260649 | ENSP00000366121 |
| ENSP00000260662 | ENSP00000271002 |
| ENSP00000260662 | ENSP00000283006 |
| ENSP00000260662 | ENSP00000325677 |
| ENSP00000260662 | ENSP00000335463 |
| ENSP00000260662 | ENSP00000336868 |
| ENSP00000260662 | ENSP00000337289 |
| ENSP00000260662 | ENSP00000364737 |
| ENSP00000260662 | ENSP00000377007 |
| ENSP00000260665 | ENSP00000262608 |
| ENSP00000260665 | ENSP00000262803 |
| ENSP00000260665 | ENSP00000264645 |
| ENSP00000260665 | ENSP00000276326 |
| ENSP00000260665 | ENSP00000297338 |
| ENSP00000260665 | ENSP00000301585 |
| ENSP00000260665 | ENSP00000305790 |
| ENSP00000260665 | ENSP00000312649 |
| ENSP00000260665 | ENSP00000313829 |

|                 |                 |
|-----------------|-----------------|
| ENSP00000260665 | ENSP00000329466 |
| ENSP00000260665 | ENSP00000337393 |
| ENSP00000260665 | ENSP00000338990 |
| ENSP00000260665 | ENSP00000343412 |
| ENSP00000260665 | ENSP00000349016 |
| ENSP00000260665 | ENSP00000363745 |
| ENSP00000260665 | ENSP00000364289 |
| ENSP00000260665 | ENSP00000372445 |
| ENSP00000260665 | ENSP00000381863 |
| ENSP00000260731 | ENSP00000261531 |
| ENSP00000260731 | ENSP00000261881 |
| ENSP00000260731 | ENSP00000261965 |
| ENSP00000260731 | ENSP00000262315 |
| ENSP00000260731 | ENSP00000263181 |
| ENSP00000260731 | ENSP00000264335 |
| ENSP00000260731 | ENSP00000264926 |
| ENSP00000260731 | ENSP00000265104 |
| ENSP00000260731 | ENSP00000265148 |
| ENSP00000260731 | ENSP00000271452 |
| ENSP00000260731 | ENSP00000276014 |
| ENSP00000260731 | ENSP00000282077 |
| ENSP00000260731 | ENSP00000282572 |
| ENSP00000260731 | ENSP00000285873 |
| ENSP00000260731 | ENSP00000286428 |
| ENSP00000260731 | ENSP00000287598 |
| ENSP00000260731 | ENSP00000296509 |
| ENSP00000260731 | ENSP00000296733 |
| ENSP00000260731 | ENSP00000297338 |
| ENSP00000260731 | ENSP00000299543 |
| ENSP00000260731 | ENSP00000300249 |
| ENSP00000260731 | ENSP00000300584 |
| ENSP00000260731 | ENSP00000301332 |
| ENSP00000260731 | ENSP00000302530 |
| ENSP00000260731 | ENSP00000306123 |
| ENSP00000260731 | ENSP00000308546 |
| ENSP00000260731 | ENSP00000318884 |
| ENSP00000260731 | ENSP00000322180 |
| ENSP00000260731 | ENSP00000325017 |
| ENSP00000260731 | ENSP00000327009 |
| ENSP00000260731 | ENSP00000332592 |
| ENSP00000260731 | ENSP00000334044 |
| ENSP00000260731 | ENSP00000334188 |
| ENSP00000260731 | ENSP00000335357 |
| ENSP00000260731 | ENSP00000336868 |
| ENSP00000260731 | ENSP00000339484 |
| ENSP00000260731 | ENSP00000341243 |

|                 |                 |
|-----------------|-----------------|
| ENSP00000260731 | ENSP00000343741 |
| ENSP00000260731 | ENSP00000343745 |
| ENSP00000260731 | ENSP00000346566 |
| ENSP00000260731 | ENSP00000347719 |
| ENSP00000260731 | ENSP00000348722 |
| ENSP00000260731 | ENSP00000348965 |
| ENSP00000260731 | ENSP00000349016 |
| ENSP00000260731 | ENSP00000349238 |
| ENSP00000260731 | ENSP00000351665 |
| ENSP00000260731 | ENSP00000351885 |
| ENSP00000260731 | ENSP00000353793 |
| ENSP00000260731 | ENSP00000354791 |
| ENSP00000260731 | ENSP00000354916 |
| ENSP00000260731 | ENSP00000355560 |
| ENSP00000260731 | ENSP00000356405 |
| ENSP00000260731 | ENSP00000356579 |
| ENSP00000260731 | ENSP00000356989 |
| ENSP00000260731 | ENSP00000357651 |
| ENSP00000260731 | ENSP00000360473 |
| ENSP00000260731 | ENSP00000360532 |
| ENSP00000260731 | ENSP00000361800 |
| ENSP00000260731 | ENSP00000361990 |
| ENSP00000260731 | ENSP00000362306 |
| ENSP00000260731 | ENSP00000362334 |
| ENSP00000260731 | ENSP00000364204 |
| ENSP00000260731 | ENSP00000366249 |
| ENSP00000260731 | ENSP00000368699 |
| ENSP00000260731 | ENSP00000368976 |
| ENSP00000260731 | ENSP00000369736 |
| ENSP00000260731 | ENSP00000373039 |
| ENSP00000260731 | ENSP00000374566 |
| ENSP00000260731 | ENSP00000377793 |
| ENSP00000260731 | ENSP00000378529 |
| ENSP00000260731 | ENSP00000382562 |
| ENSP00000260731 | ENSP00000383145 |
| ENSP00000260731 | ENSP00000396152 |
| ENSP00000260731 | ENSP00000410416 |
| ENSP00000260731 | ENSP00000414402 |
| ENSP00000260731 | ENSP00000418734 |
| ENSP00000260753 | ENSP00000263208 |
| ENSP00000260753 | ENSP00000269385 |
| ENSP00000260753 | ENSP00000286428 |
| ENSP00000260753 | ENSP00000296509 |
| ENSP00000260753 | ENSP00000301332 |
| ENSP00000260753 | ENSP00000322180 |
| ENSP00000260753 | ENSP00000323858 |

|                 |                 |
|-----------------|-----------------|
| ENSP00000260753 | ENSP00000346566 |
| ENSP00000260753 | ENSP00000354851 |
| ENSP00000260753 | ENSP00000355090 |
| ENSP00000260753 | ENSP00000368976 |
| ENSP00000260753 | ENSP00000384490 |
| ENSP00000260766 | ENSP00000262039 |
| ENSP00000260766 | ENSP00000263121 |
| ENSP00000260766 | ENSP00000265970 |
| ENSP00000260766 | ENSP00000275820 |
| ENSP00000260766 | ENSP00000286364 |
| ENSP00000260766 | ENSP00000295065 |
| ENSP00000260766 | ENSP00000322218 |
| ENSP00000260766 | ENSP00000322457 |
| ENSP00000260766 | ENSP00000352121 |
| ENSP00000260766 | ENSP00000361064 |
| ENSP00000260766 | ENSP00000361141 |
| ENSP00000260766 | ENSP00000373399 |
| ENSP00000260803 | ENSP00000261868 |
| ENSP00000260803 | ENSP00000262300 |
| ENSP00000260803 | ENSP00000264951 |
| ENSP00000260803 | ENSP00000302801 |
| ENSP00000260803 | ENSP00000307863 |
| ENSP00000260803 | ENSP00000321449 |
| ENSP00000260803 | ENSP00000323424 |
| ENSP00000260803 | ENSP00000326411 |
| ENSP00000260803 | ENSP00000326806 |
| ENSP00000260803 | ENSP00000356989 |
| ENSP00000260803 | ENSP00000361010 |
| ENSP00000260803 | ENSP00000364289 |
| ENSP00000260803 | ENSP00000386134 |
| ENSP00000260803 | ENSP00000402240 |
| ENSP00000260803 | ENSP00000417748 |
| ENSP00000260810 | ENSP00000260947 |
| ENSP00000260810 | ENSP00000261424 |
| ENSP00000260810 | ENSP00000262315 |
| ENSP00000260810 | ENSP00000262460 |
| ENSP00000260810 | ENSP00000263201 |
| ENSP00000260810 | ENSP00000265056 |
| ENSP00000260810 | ENSP00000265433 |
| ENSP00000260810 | ENSP00000265728 |
| ENSP00000260810 | ENSP00000265849 |
| ENSP00000260810 | ENSP00000268058 |
| ENSP00000260810 | ENSP00000276533 |
| ENSP00000260810 | ENSP00000278616 |
| ENSP00000260810 | ENSP00000286800 |
| ENSP00000260810 | ENSP00000287598 |

|                 |                 |
|-----------------|-----------------|
| ENSP00000260810 | ENSP00000292475 |
| ENSP00000260810 | ENSP00000296273 |
| ENSP00000260810 | ENSP00000296509 |
| ENSP00000260810 | ENSP00000300738 |
| ENSP00000260810 | ENSP00000302530 |
| ENSP00000260810 | ENSP00000305899 |
| ENSP00000260810 | ENSP00000307525 |
| ENSP00000260810 | ENSP00000308944 |
| ENSP00000260810 | ENSP00000312870 |
| ENSP00000260810 | ENSP00000313171 |
| ENSP00000260810 | ENSP00000322570 |
| ENSP00000260810 | ENSP00000323663 |
| ENSP00000260810 | ENSP00000334294 |
| ENSP00000260810 | ENSP00000340879 |
| ENSP00000260810 | ENSP00000343741 |
| ENSP00000260810 | ENSP00000348775 |
| ENSP00000260810 | ENSP00000349576 |
| ENSP00000260810 | ENSP00000350283 |
| ENSP00000260810 | ENSP00000354522 |
| ENSP00000260810 | ENSP00000363708 |
| ENSP00000260810 | ENSP00000364895 |
| ENSP00000260810 | ENSP00000366513 |
| ENSP00000260810 | ENSP00000366863 |
| ENSP00000260810 | ENSP00000369411 |
| ENSP00000260810 | ENSP00000370151 |
| ENSP00000260810 | ENSP00000371475 |
| ENSP00000260810 | ENSP00000372023 |
| ENSP00000260810 | ENSP00000373060 |
| ENSP00000260810 | ENSP00000377384 |
| ENSP00000260810 | ENSP00000381657 |
| ENSP00000260810 | ENSP00000396704 |
| ENSP00000260810 | ENSP00000401018 |
| ENSP00000260810 | ENSP00000417281 |
| ENSP00000260818 | ENSP00000261531 |
| ENSP00000260818 | ENSP00000264157 |
| ENSP00000260818 | ENSP00000273398 |
| ENSP00000260818 | ENSP00000286448 |
| ENSP00000260818 | ENSP00000305255 |
| ENSP00000260818 | ENSP00000310521 |
| ENSP00000260818 | ENSP00000317714 |
| ENSP00000260818 | ENSP00000327650 |
| ENSP00000260818 | ENSP00000355721 |
| ENSP00000260818 | ENSP00000362399 |
| ENSP00000260818 | ENSP00000374529 |
| ENSP00000260818 | ENSP00000390783 |
| ENSP00000260947 | ENSP00000263468 |

|                 |                 |
|-----------------|-----------------|
| ENSP00000260947 | ENSP00000263857 |
| ENSP00000260947 | ENSP00000265081 |
| ENSP00000260947 | ENSP00000265433 |
| ENSP00000260947 | ENSP00000278919 |
| ENSP00000260947 | ENSP00000286800 |
| ENSP00000260947 | ENSP00000294119 |
| ENSP00000260947 | ENSP00000296702 |
| ENSP00000260947 | ENSP00000296930 |
| ENSP00000260947 | ENSP00000314949 |
| ENSP00000260947 | ENSP00000315791 |
| ENSP00000260947 | ENSP00000323050 |
| ENSP00000260947 | ENSP00000325863 |
| ENSP00000260947 | ENSP00000334002 |
| ENSP00000260947 | ENSP00000341170 |
| ENSP00000260947 | ENSP00000343412 |
| ENSP00000260947 | ENSP00000347184 |
| ENSP00000260947 | ENSP00000350283 |
| ENSP00000260947 | ENSP00000352257 |
| ENSP00000260947 | ENSP00000355759 |
| ENSP00000260947 | ENSP00000357965 |
| ENSP00000260947 | ENSP00000358778 |
| ENSP00000260947 | ENSP00000360116 |
| ENSP00000260947 | ENSP00000363779 |
| ENSP00000260947 | ENSP00000365588 |
| ENSP00000260947 | ENSP00000366434 |
| ENSP00000260947 | ENSP00000368438 |
| ENSP00000260947 | ENSP00000368797 |
| ENSP00000260947 | ENSP00000369497 |
| ENSP00000260947 | ENSP00000369716 |
| ENSP00000260947 | ENSP00000378180 |
| ENSP00000260947 | ENSP00000378338 |
| ENSP00000260947 | ENSP00000381031 |
| ENSP00000260947 | ENSP00000381045 |
| ENSP00000260947 | ENSP00000387911 |
| ENSP00000260952 | ENSP00000361699 |
| ENSP00000260956 | ENSP00000261531 |
| ENSP00000260956 | ENSP00000261601 |
| ENSP00000260956 | ENSP00000262215 |
| ENSP00000260956 | ENSP00000263857 |
| ENSP00000260956 | ENSP00000264670 |
| ENSP00000260956 | ENSP00000264951 |
| ENSP00000260956 | ENSP00000265304 |
| ENSP00000260956 | ENSP00000265881 |
| ENSP00000260956 | ENSP00000267064 |
| ENSP00000260956 | ENSP00000269385 |
| ENSP00000260956 | ENSP00000272645 |

|                 |                 |
|-----------------|-----------------|
| ENSP00000260956 | ENSP00000273962 |
| ENSP00000260956 | ENSP00000274311 |
| ENSP00000260956 | ENSP00000274606 |
| ENSP00000260956 | ENSP00000283109 |
| ENSP00000260956 | ENSP00000284719 |
| ENSP00000260956 | ENSP00000285896 |
| ENSP00000260956 | ENSP00000286317 |
| ENSP00000260956 | ENSP00000286428 |
| ENSP00000260956 | ENSP00000290663 |
| ENSP00000260956 | ENSP00000296509 |
| ENSP00000260956 | ENSP00000296783 |
| ENSP00000260956 | ENSP00000296802 |
| ENSP00000260956 | ENSP00000298310 |
| ENSP00000260956 | ENSP00000298746 |
| ENSP00000260956 | ENSP00000302160 |
| ENSP00000260956 | ENSP00000302801 |
| ENSP00000260956 | ENSP00000302896 |
| ENSP00000260956 | ENSP00000309433 |
| ENSP00000260956 | ENSP00000314441 |
| ENSP00000260956 | ENSP00000316879 |
| ENSP00000260956 | ENSP00000318195 |
| ENSP00000260956 | ENSP00000318646 |
| ENSP00000260956 | ENSP00000319531 |
| ENSP00000260956 | ENSP00000322016 |
| ENSP00000260956 | ENSP00000322396 |
| ENSP00000260956 | ENSP00000322570 |
| ENSP00000260956 | ENSP00000323856 |
| ENSP00000260956 | ENSP00000324122 |
| ENSP00000260956 | ENSP00000324124 |
| ENSP00000260956 | ENSP00000325369 |
| ENSP00000260956 | ENSP00000325677 |
| ENSP00000260956 | ENSP00000326981 |
| ENSP00000260956 | ENSP00000327821 |
| ENSP00000260956 | ENSP00000329466 |
| ENSP00000260956 | ENSP00000331310 |
| ENSP00000260956 | ENSP00000337405 |
| ENSP00000260956 | ENSP00000339095 |
| ENSP00000260956 | ENSP00000340281 |
| ENSP00000260956 | ENSP00000342181 |
| ENSP00000260956 | ENSP00000342889 |
| ENSP00000260956 | ENSP00000345917 |
| ENSP00000260956 | ENSP00000346022 |
| ENSP00000260956 | ENSP00000346088 |
| ENSP00000260956 | ENSP00000347948 |
| ENSP00000260956 | ENSP00000348168 |
| ENSP00000260956 | ENSP00000348722 |

|                 |                 |
|-----------------|-----------------|
| ENSP00000260956 | ENSP00000350491 |
| ENSP00000260956 | ENSP00000351697 |
| ENSP00000260956 | ENSP00000353246 |
| ENSP00000260956 | ENSP00000354125 |
| ENSP00000260956 | ENSP00000354522 |
| ENSP00000260956 | ENSP00000354558 |
| ENSP00000260956 | ENSP00000356405 |
| ENSP00000260956 | ENSP00000356476 |
| ENSP00000260956 | ENSP00000356989 |
| ENSP00000260956 | ENSP00000357452 |
| ENSP00000260956 | ENSP00000357748 |
| ENSP00000260956 | ENSP00000357880 |
| ENSP00000260956 | ENSP00000358563 |
| ENSP00000260956 | ENSP00000359127 |
| ENSP00000260956 | ENSP00000359321 |
| ENSP00000260956 | ENSP00000359345 |
| ENSP00000260956 | ENSP00000360473 |
| ENSP00000260956 | ENSP00000360876 |
| ENSP00000260956 | ENSP00000361465 |
| ENSP00000260956 | ENSP00000361982 |
| ENSP00000260956 | ENSP00000362105 |
| ENSP00000260956 | ENSP00000362456 |
| ENSP00000260956 | ENSP00000362576 |
| ENSP00000260956 | ENSP00000362744 |
| ENSP00000260956 | ENSP00000363384 |
| ENSP00000260956 | ENSP00000363559 |
| ENSP00000260956 | ENSP00000363676 |
| ENSP00000260956 | ENSP00000363779 |
| ENSP00000260956 | ENSP00000363944 |
| ENSP00000260956 | ENSP00000364289 |
| ENSP00000260956 | ENSP00000364320 |
| ENSP00000260956 | ENSP00000365837 |
| ENSP00000260956 | ENSP00000366135 |
| ENSP00000260956 | ENSP00000367407 |
| ENSP00000260956 | ENSP00000368349 |
| ENSP00000260956 | ENSP00000368438 |
| ENSP00000260956 | ENSP00000368565 |
| ENSP00000260956 | ENSP00000368927 |
| ENSP00000260956 | ENSP00000369042 |
| ENSP00000260956 | ENSP00000369757 |
| ENSP00000260956 | ENSP00000370589 |
| ENSP00000260956 | ENSP00000370741 |
| ENSP00000260956 | ENSP00000374399 |
| ENSP00000260956 | ENSP00000379607 |
| ENSP00000260956 | ENSP00000379888 |
| ENSP00000260956 | ENSP00000380460 |



|                 |                 |
|-----------------|-----------------|
| ENSP00000260956 | ENSP00000381216 |
| ENSP00000260956 | ENSP00000382392 |
| ENSP00000260956 | ENSP00000384490 |
| ENSP00000260956 | ENSP00000391774 |
| ENSP00000260956 | ENSP00000402338 |
| ENSP00000260956 | ENSP00000403852 |
| ENSP00000260956 | ENSP00000414321 |
| ENSP00000260956 | ENSP00000417229 |
| ENSP00000260970 | ENSP00000283351 |
| ENSP00000260970 | ENSP00000294053 |
| ENSP00000260970 | ENSP00000297151 |
| ENSP00000260970 | ENSP00000297338 |
| ENSP00000260970 | ENSP00000305958 |
| ENSP00000260970 | ENSP00000314949 |
| ENSP00000260970 | ENSP00000315859 |
| ENSP00000260970 | ENSP00000324274 |
| ENSP00000260970 | ENSP00000326424 |
| ENSP00000260970 | ENSP00000329357 |
| ENSP00000260970 | ENSP00000331817 |
| ENSP00000260970 | ENSP00000336724 |
| ENSP00000260970 | ENSP00000337127 |
| ENSP00000260970 | ENSP00000337340 |
| ENSP00000260970 | ENSP00000345793 |
| ENSP00000260970 | ENSP00000346791 |
| ENSP00000260970 | ENSP00000348551 |
| ENSP00000260970 | ENSP00000356579 |
| ENSP00000260970 | ENSP00000360329 |
| ENSP00000260970 | ENSP00000360464 |
| ENSP00000260970 | ENSP00000360532 |
| ENSP00000260970 | ENSP00000366843 |
| ENSP00000260970 | ENSP00000367208 |
| ENSP00000260970 | ENSP00000368976 |
| ENSP00000260970 | ENSP00000381003 |
| ENSP00000260970 | ENSP00000386621 |
| ENSP00000261015 | ENSP00000262030 |
| ENSP00000261015 | ENSP00000264926 |
| ENSP00000261015 | ENSP00000268661 |
| ENSP00000261015 | ENSP00000277541 |
| ENSP00000261015 | ENSP00000278856 |
| ENSP00000261015 | ENSP00000296802 |
| ENSP00000261015 | ENSP00000298746 |
| ENSP00000261015 | ENSP00000302886 |
| ENSP00000261015 | ENSP00000305702 |
| ENSP00000261015 | ENSP00000307889 |
| ENSP00000261015 | ENSP00000313851 |
| ENSP00000261015 | ENSP00000314348 |

|                 |                 |
|-----------------|-----------------|
| ENSP00000261015 | ENSP00000317992 |
| ENSP00000261015 | ENSP00000318604 |
| ENSP00000261015 | ENSP00000322396 |
| ENSP00000261015 | ENSP00000323858 |
| ENSP00000261015 | ENSP00000328690 |
| ENSP00000261015 | ENSP00000329466 |
| ENSP00000261015 | ENSP00000338573 |
| ENSP00000261015 | ENSP00000338862 |
| ENSP00000261015 | ENSP00000339095 |
| ENSP00000261015 | ENSP00000339145 |
| ENSP00000261015 | ENSP00000339795 |
| ENSP00000261015 | ENSP00000346725 |
| ENSP00000261015 | ENSP00000351644 |
| ENSP00000261015 | ENSP00000352021 |
| ENSP00000261015 | ENSP00000353246 |
| ENSP00000261015 | ENSP00000354040 |
| ENSP00000261015 | ENSP00000358400 |
| ENSP00000261015 | ENSP00000358563 |
| ENSP00000261015 | ENSP00000358812 |
| ENSP00000261015 | ENSP00000359345 |
| ENSP00000261015 | ENSP00000359688 |
| ENSP00000261015 | ENSP00000360412 |
| ENSP00000261015 | ENSP00000360828 |
| ENSP00000261015 | ENSP00000361076 |
| ENSP00000261015 | ENSP00000363559 |
| ENSP00000261015 | ENSP00000364320 |
| ENSP00000261015 | ENSP00000366519 |
| ENSP00000261015 | ENSP00000366557 |
| ENSP00000261015 | ENSP00000368612 |
| ENSP00000261015 | ENSP00000368887 |
| ENSP00000261015 | ENSP00000370258 |
| ENSP00000261015 | ENSP00000380982 |
| ENSP00000261015 | ENSP00000381220 |
| ENSP00000261015 | ENSP00000382392 |
| ENSP00000261015 | ENSP00000402338 |
| ENSP00000261015 | ENSP00000414321 |
| ENSP00000261015 | ENSP00000420714 |
| ENSP00000261017 | ENSP00000269221 |
| ENSP00000261017 | ENSP00000281172 |
| ENSP00000261017 | ENSP00000301765 |
| ENSP00000261017 | ENSP00000313829 |
| ENSP00000261017 | ENSP00000315465 |
| ENSP00000261017 | ENSP00000327077 |
| ENSP00000261017 | ENSP00000352425 |
| ENSP00000261017 | ENSP00000354251 |
| ENSP00000261017 | ENSP00000355296 |

|                 |                 |
|-----------------|-----------------|
| ENSP00000261017 | ENSP00000355809 |
| ENSP00000261017 | ENSP00000355922 |
| ENSP00000261017 | ENSP00000362085 |
| ENSP00000261017 | ENSP00000362424 |
| ENSP00000261017 | ENSP00000363095 |
| ENSP00000261017 | ENSP00000365401 |
| ENSP00000261017 | ENSP00000365891 |
| ENSP00000261017 | ENSP00000380921 |
| ENSP00000261024 | ENSP00000284981 |
| ENSP00000261024 | ENSP00000309710 |
| ENSP00000261024 | ENSP00000373363 |
| ENSP00000261024 | ENSP00000374455 |
| ENSP00000261024 | ENSP00000419952 |
| ENSP00000261037 | ENSP00000271643 |
| ENSP00000261070 | ENSP00000263228 |
| ENSP00000261070 | ENSP00000282050 |
| ENSP00000261070 | ENSP00000295767 |
| ENSP00000261070 | ENSP00000325136 |
| ENSP00000261070 | ENSP00000326052 |
| ENSP00000261070 | ENSP00000352219 |
| ENSP00000261070 | ENSP00000391723 |
| ENSP00000261167 | ENSP00000304903 |
| ENSP00000261167 | ENSP00000326767 |
| ENSP00000261167 | ENSP00000326879 |
| ENSP00000261167 | ENSP00000349640 |
| ENSP00000261167 | ENSP00000355050 |
| ENSP00000261167 | ENSP00000358059 |
| ENSP00000261167 | ENSP00000365747 |
| ENSP00000261167 | ENSP00000368801 |
| ENSP00000261167 | ENSP00000370719 |
| ENSP00000261167 | ENSP00000387170 |
| ENSP00000261168 | ENSP00000261880 |
| ENSP00000261168 | ENSP00000265963 |
| ENSP00000261168 | ENSP00000269468 |
| ENSP00000261168 | ENSP00000272645 |
| ENSP00000261168 | ENSP00000282032 |
| ENSP00000261168 | ENSP00000283875 |
| ENSP00000261168 | ENSP00000285398 |
| ENSP00000261168 | ENSP00000301788 |
| ENSP00000261168 | ENSP00000314949 |
| ENSP00000261168 | ENSP00000329357 |
| ENSP00000261168 | ENSP00000330343 |
| ENSP00000261168 | ENSP00000339826 |
| ENSP00000261168 | ENSP00000341551 |
| ENSP00000261168 | ENSP00000348168 |
| ENSP00000261168 | ENSP00000355596 |

|                 |                 |
|-----------------|-----------------|
| ENSP00000261168 | ENSP00000356634 |
| ENSP00000261168 | ENSP00000357965 |
| ENSP00000261168 | ENSP00000375809 |
| ENSP00000261168 | ENSP00000377969 |
| ENSP00000261170 | ENSP00000262460 |
| ENSP00000261170 | ENSP00000264917 |
| ENSP00000261170 | ENSP00000327107 |
| ENSP00000261170 | ENSP00000337127 |
| ENSP00000261170 | ENSP00000345096 |
| ENSP00000261170 | ENSP00000349493 |
| ENSP00000261170 | ENSP00000351015 |
| ENSP00000261170 | ENSP00000367208 |
| ENSP00000261173 | ENSP00000262052 |
| ENSP00000261173 | ENSP00000264335 |
| ENSP00000261173 | ENSP00000265351 |
| ENSP00000261173 | ENSP00000273398 |
| ENSP00000261173 | ENSP00000286448 |
| ENSP00000261173 | ENSP00000303507 |
| ENSP00000261173 | ENSP00000304500 |
| ENSP00000261173 | ENSP00000305647 |
| ENSP00000261173 | ENSP00000306106 |
| ENSP00000261173 | ENSP00000311200 |
| ENSP00000261173 | ENSP00000328968 |
| ENSP00000261173 | ENSP00000333873 |
| ENSP00000261173 | ENSP00000344393 |
| ENSP00000261173 | ENSP00000355968 |
| ENSP00000261173 | ENSP00000357998 |
| ENSP00000261173 | ENSP00000370607 |
| ENSP00000261173 | ENSP00000385083 |
| ENSP00000261183 | ENSP00000286448 |
| ENSP00000261183 | ENSP00000291688 |
| ENSP00000261183 | ENSP00000296786 |
| ENSP00000261183 | ENSP00000302239 |
| ENSP00000261183 | ENSP00000303554 |
| ENSP00000261183 | ENSP00000318262 |
| ENSP00000261183 | ENSP00000318723 |
| ENSP00000261183 | ENSP00000325506 |
| ENSP00000261183 | ENSP00000329466 |
| ENSP00000261183 | ENSP00000342793 |
| ENSP00000261183 | ENSP00000348577 |
| ENSP00000261183 | ENSP00000354519 |
| ENSP00000261183 | ENSP00000354558 |
| ENSP00000261183 | ENSP00000358140 |
| ENSP00000261183 | ENSP00000369860 |
| ENSP00000261183 | ENSP00000369862 |
| ENSP00000261183 | ENSP00000376268 |

|                 |                 |
|-----------------|-----------------|
| ENSP00000261191 | ENSP00000261531 |
| ENSP00000261191 | ENSP00000310260 |
| ENSP00000261191 | ENSP00000318641 |
| ENSP00000261191 | ENSP00000327889 |
| ENSP00000261191 | ENSP00000385722 |
| ENSP00000261191 | ENSP00000415151 |
| ENSP00000261207 | ENSP00000265073 |
| ENSP00000261207 | ENSP00000272167 |
| ENSP00000261207 | ENSP00000274031 |
| ENSP00000261207 | ENSP00000276326 |
| ENSP00000261207 | ENSP00000295951 |
| ENSP00000261207 | ENSP00000298910 |
| ENSP00000261207 | ENSP00000302935 |
| ENSP00000261207 | ENSP00000306245 |
| ENSP00000261207 | ENSP00000317790 |
| ENSP00000261207 | ENSP00000317985 |
| ENSP00000261207 | ENSP00000331310 |
| ENSP00000261207 | ENSP00000344666 |
| ENSP00000261207 | ENSP00000348010 |
| ENSP00000261207 | ENSP00000349049 |
| ENSP00000261207 | ENSP00000350512 |
| ENSP00000261207 | ENSP00000355296 |
| ENSP00000261207 | ENSP00000357907 |
| ENSP00000261207 | ENSP00000359206 |
| ENSP00000261207 | ENSP00000361824 |
| ENSP00000261207 | ENSP00000380942 |
| ENSP00000261208 | ENSP00000357907 |
| ENSP00000261211 | ENSP00000261596 |
| ENSP00000261211 | ENSP00000262077 |
| ENSP00000261211 | ENSP00000262173 |
| ENSP00000261211 | ENSP00000263121 |
| ENSP00000261211 | ENSP00000265717 |
| ENSP00000261211 | ENSP00000269214 |
| ENSP00000261211 | ENSP00000272322 |
| ENSP00000261211 | ENSP00000296328 |
| ENSP00000261211 | ENSP00000296509 |
| ENSP00000261211 | ENSP00000299543 |
| ENSP00000261211 | ENSP00000306999 |
| ENSP00000261211 | ENSP00000310649 |
| ENSP00000261211 | ENSP00000314949 |
| ENSP00000261211 | ENSP00000317904 |
| ENSP00000261211 | ENSP00000325863 |
| ENSP00000261211 | ENSP00000336606 |
| ENSP00000261211 | ENSP00000338703 |
| ENSP00000261211 | ENSP00000341382 |
| ENSP00000261211 | ENSP00000344220 |

|                 |                 |
|-----------------|-----------------|
| ENSP00000261211 | ENSP00000346566 |
| ENSP00000261211 | ENSP00000347444 |
| ENSP00000261211 | ENSP00000347978 |
| ENSP00000261211 | ENSP00000348554 |
| ENSP00000261211 | ENSP00000351284 |
| ENSP00000261211 | ENSP00000353564 |
| ENSP00000261211 | ENSP00000353698 |
| ENSP00000261211 | ENSP00000357048 |
| ENSP00000261211 | ENSP00000357748 |
| ENSP00000261211 | ENSP00000358140 |
| ENSP00000261211 | ENSP00000360310 |
| ENSP00000261211 | ENSP00000362334 |
| ENSP00000261211 | ENSP00000366121 |
| ENSP00000261211 | ENSP00000368305 |
| ENSP00000261211 | ENSP00000369335 |
| ENSP00000261211 | ENSP00000371475 |
| ENSP00000261211 | ENSP00000372857 |
| ENSP00000261211 | ENSP00000378350 |
| ENSP00000261211 | ENSP00000380129 |
| ENSP00000261211 | ENSP00000384313 |
| ENSP00000261211 | ENSP00000402527 |
| ENSP00000261211 | ENSP00000417963 |
| ENSP00000261245 | ENSP00000265963 |
| ENSP00000261245 | ENSP00000267163 |
| ENSP00000261245 | ENSP00000273480 |
| ENSP00000261245 | ENSP00000276072 |
| ENSP00000261245 | ENSP00000283875 |
| ENSP00000261245 | ENSP00000285398 |
| ENSP00000261245 | ENSP00000298552 |
| ENSP00000261245 | ENSP00000299238 |
| ENSP00000261245 | ENSP00000312697 |
| ENSP00000261245 | ENSP00000313881 |
| ENSP00000261245 | ENSP00000315950 |
| ENSP00000261245 | ENSP00000320646 |
| ENSP00000261245 | ENSP00000333633 |
| ENSP00000261245 | ENSP00000342087 |
| ENSP00000261245 | ENSP00000342755 |
| ENSP00000261245 | ENSP00000348168 |
| ENSP00000261245 | ENSP00000350283 |
| ENSP00000261245 | ENSP00000350708 |
| ENSP00000261245 | ENSP00000353332 |
| ENSP00000261245 | ENSP00000356811 |
| ENSP00000261245 | ENSP00000358778 |
| ENSP00000261245 | ENSP00000363384 |
| ENSP00000261245 | ENSP00000365504 |
| ENSP00000261245 | ENSP00000375809 |

|                 |                 |
|-----------------|-----------------|
| ENSP00000261245 | ENSP00000377617 |
| ENSP00000261245 | ENSP00000391685 |
| ENSP00000261245 | ENSP00000395497 |
| ENSP00000261245 | ENSP00000396251 |
| ENSP00000261245 | ENSP00000401105 |
| ENSP00000261245 | ENSP00000403156 |
| ENSP00000261247 | ENSP00000298852 |
| ENSP00000261247 | ENSP00000310129 |
| ENSP00000261249 | ENSP00000288828 |
| ENSP00000261249 | ENSP00000299138 |
| ENSP00000261249 | ENSP00000309433 |
| ENSP00000261249 | ENSP00000353741 |
| ENSP00000261292 | ENSP00000347206 |
| ENSP00000261292 | ENSP00000373952 |
| ENSP00000261302 | ENSP00000337088 |
| ENSP00000261308 | ENSP00000261531 |
| ENSP00000261308 | ENSP00000263201 |
| ENSP00000261308 | ENSP00000273783 |
| ENSP00000261308 | ENSP00000360532 |
| ENSP00000261308 | ENSP00000366557 |
| ENSP00000261308 | ENSP00000387006 |
| ENSP00000261326 | ENSP00000263774 |
| ENSP00000261326 | ENSP00000302896 |
| ENSP00000261326 | ENSP00000310623 |
| ENSP00000261326 | ENSP00000326981 |
| ENSP00000261326 | ENSP00000356972 |
| ENSP00000261368 | ENSP00000317817 |
| ENSP00000261368 | ENSP00000322457 |
| ENSP00000261368 | ENSP00000338345 |
| ENSP00000261368 | ENSP00000342667 |
| ENSP00000261368 | ENSP00000355865 |
| ENSP00000261381 | ENSP00000379383 |
| ENSP00000261386 | ENSP00000326699 |
| ENSP00000261386 | ENSP00000350012 |
| ENSP00000261396 | ENSP00000261881 |
| ENSP00000261396 | ENSP00000262077 |
| ENSP00000261396 | ENSP00000262315 |
| ENSP00000261396 | ENSP00000263208 |
| ENSP00000261396 | ENSP00000264718 |
| ENSP00000261396 | ENSP00000264883 |
| ENSP00000261396 | ENSP00000265351 |
| ENSP00000261396 | ENSP00000283195 |
| ENSP00000261396 | ENSP00000291688 |
| ENSP00000261396 | ENSP00000296257 |
| ENSP00000261396 | ENSP00000296509 |
| ENSP00000261396 | ENSP00000297185 |

|                 |                 |
|-----------------|-----------------|
| ENSP00000261396 | ENSP00000302790 |
| ENSP00000261396 | ENSP00000302886 |
| ENSP00000261396 | ENSP00000305503 |
| ENSP00000261396 | ENSP00000308622 |
| ENSP00000261396 | ENSP00000310668 |
| ENSP00000261396 | ENSP00000316032 |
| ENSP00000261396 | ENSP00000318977 |
| ENSP00000261396 | ENSP00000322180 |
| ENSP00000261396 | ENSP00000322242 |
| ENSP00000261396 | ENSP00000325863 |
| ENSP00000261396 | ENSP00000327197 |
| ENSP00000261396 | ENSP00000329466 |
| ENSP00000261396 | ENSP00000329933 |
| ENSP00000261396 | ENSP00000336606 |
| ENSP00000261396 | ENSP00000338413 |
| ENSP00000261396 | ENSP00000342262 |
| ENSP00000261396 | ENSP00000346453 |
| ENSP00000261396 | ENSP00000351284 |
| ENSP00000261396 | ENSP00000352021 |
| ENSP00000261396 | ENSP00000352400 |
| ENSP00000261396 | ENSP00000353793 |
| ENSP00000261396 | ENSP00000354522 |
| ENSP00000261396 | ENSP00000354673 |
| ENSP00000261396 | ENSP00000355922 |
| ENSP00000261396 | ENSP00000356470 |
| ENSP00000261396 | ENSP00000360286 |
| ENSP00000261396 | ENSP00000367721 |
| ENSP00000261396 | ENSP00000369335 |
| ENSP00000261396 | ENSP00000382562 |
| ENSP00000261396 | ENSP00000382779 |
| ENSP00000261396 | ENSP00000386759 |
| ENSP00000261396 | ENSP00000394791 |
| ENSP00000261402 | ENSP00000298552 |
| ENSP00000261402 | ENSP00000341551 |
| ENSP00000261405 | ENSP00000266556 |
| ENSP00000261405 | ENSP00000280527 |
| ENSP00000261405 | ENSP00000286091 |
| ENSP00000261405 | ENSP00000296550 |
| ENSP00000261405 | ENSP00000297350 |
| ENSP00000261405 | ENSP00000299767 |
| ENSP00000261405 | ENSP00000329380 |
| ENSP00000261405 | ENSP00000341637 |
| ENSP00000261405 | ENSP00000348307 |
| ENSP00000261405 | ENSP00000352455 |
| ENSP00000261405 | ENSP00000353393 |
| ENSP00000261405 | ENSP00000354927 |



|                 |                 |
|-----------------|-----------------|
| ENSP00000261405 | ENSP00000357484 |
| ENSP00000261405 | ENSP00000360997 |
| ENSP00000261405 | ENSP00000367408 |
| ENSP00000261407 | ENSP00000262134 |
| ENSP00000261407 | ENSP00000266095 |
| ENSP00000261407 | ENSP00000310551 |
| ENSP00000261407 | ENSP00000337463 |
| ENSP00000261407 | ENSP00000355963 |
| ENSP00000261407 | ENSP00000380184 |
| ENSP00000261407 | ENSP00000395863 |
| ENSP00000261407 | ENSP00000401287 |
| ENSP00000261413 | ENSP00000264230 |
| ENSP00000261413 | ENSP00000301585 |
| ENSP00000261413 | ENSP00000379607 |
| ENSP00000261416 | ENSP00000271764 |
| ENSP00000261416 | ENSP00000362314 |
| ENSP00000261424 | ENSP00000261881 |
| ENSP00000261424 | ENSP00000261951 |
| ENSP00000261424 | ENSP00000262315 |
| ENSP00000261424 | ENSP00000262518 |
| ENSP00000261424 | ENSP00000263201 |
| ENSP00000261424 | ENSP00000263202 |
| ENSP00000261424 | ENSP00000263274 |
| ENSP00000261424 | ENSP00000263377 |
| ENSP00000261424 | ENSP00000263795 |
| ENSP00000261424 | ENSP00000264926 |
| ENSP00000261424 | ENSP00000265140 |
| ENSP00000261424 | ENSP00000265433 |
| ENSP00000261424 | ENSP00000265465 |
| ENSP00000261424 | ENSP00000265849 |
| ENSP00000261424 | ENSP00000266182 |
| ENSP00000261424 | ENSP00000267163 |
| ENSP00000261424 | ENSP00000267430 |
| ENSP00000261424 | ENSP00000268043 |
| ENSP00000261424 | ENSP00000269214 |
| ENSP00000261424 | ENSP00000278412 |
| ENSP00000261424 | ENSP00000278616 |
| ENSP00000261424 | ENSP00000280614 |
| ENSP00000261424 | ENSP00000282326 |
| ENSP00000261424 | ENSP00000282516 |
| ENSP00000261424 | ENSP00000285021 |
| ENSP00000261424 | ENSP00000287598 |
| ENSP00000261424 | ENSP00000288774 |
| ENSP00000261424 | ENSP00000296273 |
| ENSP00000261424 | ENSP00000296509 |
| ENSP00000261424 | ENSP00000297338 |

|                 |                 |
|-----------------|-----------------|
| ENSP00000261424 | ENSP00000297431 |
| ENSP00000261424 | ENSP00000298832 |
| ENSP00000261424 | ENSP00000300249 |
| ENSP00000261424 | ENSP00000300738 |
| ENSP00000261424 | ENSP00000302530 |
| ENSP00000261424 | ENSP00000304903 |
| ENSP00000261424 | ENSP00000306999 |
| ENSP00000261424 | ENSP00000307853 |
| ENSP00000261424 | ENSP00000308699 |
| ENSP00000261424 | ENSP00000308759 |
| ENSP00000261424 | ENSP00000308944 |
| ENSP00000261424 | ENSP00000309142 |
| ENSP00000261424 | ENSP00000309572 |
| ENSP00000261424 | ENSP00000310520 |
| ENSP00000261424 | ENSP00000311873 |
| ENSP00000261424 | ENSP00000313171 |
| ENSP00000261424 | ENSP00000313851 |
| ENSP00000261424 | ENSP00000318977 |
| ENSP00000261424 | ENSP00000321636 |
| ENSP00000261424 | ENSP00000322180 |
| ENSP00000261424 | ENSP00000322242 |
| ENSP00000261424 | ENSP00000322570 |
| ENSP00000261424 | ENSP00000323439 |
| ENSP00000261424 | ENSP00000325677 |
| ENSP00000261424 | ENSP00000325863 |
| ENSP00000261424 | ENSP00000329466 |
| ENSP00000261424 | ENSP00000336606 |
| ENSP00000261424 | ENSP00000340879 |
| ENSP00000261424 | ENSP00000343392 |
| ENSP00000261424 | ENSP00000343741 |
| ENSP00000261424 | ENSP00000343745 |
| ENSP00000261424 | ENSP00000347168 |
| ENSP00000261424 | ENSP00000347232 |
| ENSP00000261424 | ENSP00000347719 |
| ENSP00000261424 | ENSP00000347978 |
| ENSP00000261424 | ENSP00000349393 |
| ENSP00000261424 | ENSP00000350011 |
| ENSP00000261424 | ENSP00000350283 |
| ENSP00000261424 | ENSP00000350491 |
| ENSP00000261424 | ENSP00000350767 |
| ENSP00000261424 | ENSP00000351284 |
| ENSP00000261424 | ENSP00000351697 |
| ENSP00000261424 | ENSP00000352257 |
| ENSP00000261424 | ENSP00000352738 |
| ENSP00000261424 | ENSP00000353332 |
| ENSP00000261424 | ENSP00000353793 |

|                 |                 |
|-----------------|-----------------|
| ENSP00000261424 | ENSP00000354522 |
| ENSP00000261424 | ENSP00000354720 |
| ENSP00000261424 | ENSP00000355759 |
| ENSP00000261424 | ENSP00000357602 |
| ENSP00000261424 | ENSP00000360310 |
| ENSP00000261424 | ENSP00000360371 |
| ENSP00000261424 | ENSP00000360621 |
| ENSP00000261424 | ENSP00000361707 |
| ENSP00000261424 | ENSP00000362352 |
| ENSP00000261424 | ENSP00000363021 |
| ENSP00000261424 | ENSP00000364270 |
| ENSP00000261424 | ENSP00000366974 |
| ENSP00000261424 | ENSP00000367034 |
| ENSP00000261424 | ENSP00000367787 |
| ENSP00000261424 | ENSP00000368349 |
| ENSP00000261424 | ENSP00000368438 |
| ENSP00000261424 | ENSP00000368591 |
| ENSP00000261424 | ENSP00000369335 |
| ENSP00000261424 | ENSP00000369411 |
| ENSP00000261424 | ENSP00000370150 |
| ENSP00000261424 | ENSP00000370151 |
| ENSP00000261424 | ENSP00000371419 |
| ENSP00000261424 | ENSP00000371475 |
| ENSP00000261424 | ENSP00000372023 |
| ENSP00000261424 | ENSP00000374213 |
| ENSP00000261424 | ENSP00000375809 |
| ENSP00000261424 | ENSP00000380504 |
| ENSP00000261424 | ENSP00000382562 |
| ENSP00000261424 | ENSP00000396704 |
| ENSP00000261424 | ENSP00000406490 |
| ENSP00000261424 | ENSP00000420588 |
| ENSP00000261434 | ENSP00000268379 |
| ENSP00000261434 | ENSP00000280701 |
| ENSP00000261434 | ENSP00000282999 |
| ENSP00000261434 | ENSP00000304592 |
| ENSP00000261434 | ENSP00000315693 |
| ENSP00000261434 | ENSP00000348965 |
| ENSP00000261434 | ENSP00000360782 |
| ENSP00000261434 | ENSP00000363308 |
| ENSP00000261435 | ENSP00000261965 |
| ENSP00000261435 | ENSP00000262367 |
| ENSP00000261435 | ENSP00000264731 |
| ENSP00000261435 | ENSP00000314733 |
| ENSP00000261435 | ENSP00000345530 |
| ENSP00000261454 | ENSP00000262367 |
| ENSP00000261454 | ENSP00000288422 |

|                 |                 |
|-----------------|-----------------|
| ENSP00000261454 | ENSP00000311825 |
| ENSP00000261454 | ENSP00000322457 |
| ENSP00000261454 | ENSP00000342828 |
| ENSP00000261454 | ENSP00000353344 |
| ENSP00000261454 | ENSP00000356331 |
| ENSP00000261454 | ENSP00000356595 |
| ENSP00000261454 | ENSP00000378286 |
| ENSP00000261454 | ENSP00000378733 |
| ENSP00000261475 | ENSP00000296755 |
| ENSP00000261475 | ENSP00000300231 |
| ENSP00000261475 | ENSP00000311344 |
| ENSP00000261488 | ENSP00000263925 |
| ENSP00000261488 | ENSP00000338157 |
| ENSP00000261488 | ENSP00000370410 |
| ENSP00000261488 | ENSP00000386394 |
| ENSP00000261499 | ENSP00000265993 |
| ENSP00000261499 | ENSP00000304941 |
| ENSP00000261499 | ENSP00000335094 |
| ENSP00000261499 | ENSP00000337396 |
| ENSP00000261499 | ENSP00000356774 |
| ENSP00000261499 | ENSP00000366135 |
| ENSP00000261499 | ENSP00000376827 |
| ENSP00000261507 | ENSP00000264027 |
| ENSP00000261507 | ENSP00000264451 |
| ENSP00000261507 | ENSP00000265896 |
| ENSP00000261507 | ENSP00000272163 |
| ENSP00000261507 | ENSP00000277010 |
| ENSP00000261507 | ENSP00000285949 |
| ENSP00000261507 | ENSP00000287936 |
| ENSP00000261507 | ENSP00000310721 |
| ENSP00000261507 | ENSP00000325425 |
| ENSP00000261507 | ENSP00000330812 |
| ENSP00000261507 | ENSP00000333946 |
| ENSP00000261507 | ENSP00000336712 |
| ENSP00000261507 | ENSP00000341662 |
| ENSP00000261507 | ENSP00000344741 |
| ENSP00000261507 | ENSP00000348762 |
| ENSP00000261507 | ENSP00000355517 |
| ENSP00000261507 | ENSP00000356591 |
| ENSP00000261507 | ENSP00000357775 |
| ENSP00000261507 | ENSP00000359380 |
| ENSP00000261507 | ENSP00000361845 |
| ENSP00000261507 | ENSP00000371236 |
| ENSP00000261507 | ENSP00000379430 |
| ENSP00000261507 | ENSP00000386284 |
| ENSP00000261509 | ENSP00000284776 |

|                 |                 |
|-----------------|-----------------|
| ENSP00000261509 | ENSP00000294129 |
| ENSP00000261514 | ENSP00000274376 |
| ENSP00000261514 | ENSP00000304500 |
| ENSP00000261514 | ENSP00000311842 |
| ENSP00000261514 | ENSP00000349887 |
| ENSP00000261514 | ENSP00000357484 |
| ENSP00000261517 | ENSP00000262315 |
| ENSP00000261517 | ENSP00000273398 |
| ENSP00000261517 | ENSP00000299138 |
| ENSP00000261517 | ENSP00000311200 |
| ENSP00000261517 | ENSP00000342793 |
| ENSP00000261517 | ENSP00000349131 |
| ENSP00000261517 | ENSP00000365233 |
| ENSP00000261517 | ENSP00000365943 |
| ENSP00000261520 | ENSP00000263390 |
| ENSP00000261520 | ENSP00000296564 |
| ENSP00000261520 | ENSP00000380054 |
| ENSP00000261523 | ENSP00000266744 |
| ENSP00000261523 | ENSP00000285873 |
| ENSP00000261523 | ENSP00000300651 |
| ENSP00000261523 | ENSP00000305422 |
| ENSP00000261523 | ENSP00000314420 |
| ENSP00000261523 | ENSP00000321345 |
| ENSP00000261523 | ENSP00000348877 |
| ENSP00000261523 | ENSP00000358778 |
| ENSP00000261523 | ENSP00000364847 |
| ENSP00000261523 | ENSP00000368253 |
| ENSP00000261523 | ENSP00000370826 |
| ENSP00000261523 | ENSP00000377520 |
| ENSP00000261523 | ENSP00000399968 |
| ENSP00000261531 | ENSP00000261597 |
| ENSP00000261531 | ENSP00000261600 |
| ENSP00000261531 | ENSP00000261712 |
| ENSP00000261531 | ENSP00000261965 |
| ENSP00000261531 | ENSP00000261973 |
| ENSP00000261531 | ENSP00000262077 |
| ENSP00000261531 | ENSP00000262133 |
| ENSP00000261531 | ENSP00000262238 |
| ENSP00000261531 | ENSP00000262544 |
| ENSP00000261531 | ENSP00000262584 |
| ENSP00000261531 | ENSP00000262710 |
| ENSP00000261531 | ENSP00000262803 |
| ENSP00000261531 | ENSP00000262962 |
| ENSP00000261531 | ENSP00000262982 |
| ENSP00000261531 | ENSP00000263121 |
| ENSP00000261531 | ENSP00000263208 |

|                 |                 |
|-----------------|-----------------|
| ENSP00000261531 | ENSP00000263360 |
| ENSP00000261531 | ENSP00000263381 |
| ENSP00000261531 | ENSP00000263956 |
| ENSP00000261531 | ENSP00000263974 |
| ENSP00000261531 | ENSP00000264028 |
| ENSP00000261531 | ENSP00000264065 |
| ENSP00000261531 | ENSP00000264447 |
| ENSP00000261531 | ENSP00000264515 |
| ENSP00000261531 | ENSP00000264639 |
| ENSP00000261531 | ENSP00000264720 |
| ENSP00000261531 | ENSP00000264926 |
| ENSP00000261531 | ENSP00000265433 |
| ENSP00000261531 | ENSP00000265748 |
| ENSP00000261531 | ENSP00000265753 |
| ENSP00000261531 | ENSP00000265990 |
| ENSP00000261531 | ENSP00000266000 |
| ENSP00000261531 | ENSP00000266070 |
| ENSP00000261531 | ENSP00000266079 |
| ENSP00000261531 | ENSP00000266732 |
| ENSP00000261531 | ENSP00000267064 |
| ENSP00000261531 | ENSP00000267163 |
| ENSP00000261531 | ENSP00000267812 |
| ENSP00000261531 | ENSP00000268182 |
| ENSP00000261531 | ENSP00000268482 |
| ENSP00000261531 | ENSP00000268717 |
| ENSP00000261531 | ENSP00000271452 |
| ENSP00000261531 | ENSP00000271628 |
| ENSP00000261531 | ENSP00000271715 |
| ENSP00000261531 | ENSP00000276570 |
| ENSP00000261531 | ENSP00000277541 |
| ENSP00000261531 | ENSP00000278572 |
| ENSP00000261531 | ENSP00000278616 |
| ENSP00000261531 | ENSP00000281708 |
| ENSP00000261531 | ENSP00000282326 |
| ENSP00000261531 | ENSP00000282516 |
| ENSP00000261531 | ENSP00000282999 |
| ENSP00000261531 | ENSP00000283195 |
| ENSP00000261531 | ENSP00000283943 |
| ENSP00000261531 | ENSP00000284719 |
| ENSP00000261531 | ENSP00000285873 |
| ENSP00000261531 | ENSP00000286070 |
| ENSP00000261531 | ENSP00000287598 |
| ENSP00000261531 | ENSP00000289371 |
| ENSP00000261531 | ENSP00000290158 |
| ENSP00000261531 | ENSP00000292211 |
| ENSP00000261531 | ENSP00000292476 |

|                 |                 |
|-----------------|-----------------|
| ENSP00000261531 | ENSP00000292616 |
| ENSP00000261531 | ENSP00000295373 |
| ENSP00000261531 | ENSP00000296015 |
| ENSP00000261531 | ENSP00000296043 |
| ENSP00000261531 | ENSP00000296215 |
| ENSP00000261531 | ENSP00000296273 |
| ENSP00000261531 | ENSP00000296702 |
| ENSP00000261531 | ENSP00000297151 |
| ENSP00000261531 | ENSP00000297338 |
| ENSP00000261531 | ENSP00000297814 |
| ENSP00000261531 | ENSP00000298281 |
| ENSP00000261531 | ENSP00000298746 |
| ENSP00000261531 | ENSP00000298767 |
| ENSP00000261531 | ENSP00000298852 |
| ENSP00000261531 | ENSP00000299767 |
| ENSP00000261531 | ENSP00000300648 |
| ENSP00000261531 | ENSP00000301740 |
| ENSP00000261531 | ENSP00000301764 |
| ENSP00000261531 | ENSP00000301843 |
| ENSP00000261531 | ENSP00000302530 |
| ENSP00000261531 | ENSP00000302790 |
| ENSP00000261531 | ENSP00000303191 |
| ENSP00000261531 | ENSP00000304102 |
| ENSP00000261531 | ENSP00000304350 |
| ENSP00000261531 | ENSP00000304370 |
| ENSP00000261531 | ENSP00000304592 |
| ENSP00000261531 | ENSP00000304704 |
| ENSP00000261531 | ENSP00000305790 |
| ENSP00000261531 | ENSP00000306983 |
| ENSP00000261531 | ENSP00000307387 |
| ENSP00000261531 | ENSP00000307863 |
| ENSP00000261531 | ENSP00000307889 |
| ENSP00000261531 | ENSP00000308351 |
| ENSP00000261531 | ENSP00000308944 |
| ENSP00000261531 | ENSP00000309166 |
| ENSP00000261531 | ENSP00000309262 |
| ENSP00000261531 | ENSP00000309474 |
| ENSP00000261531 | ENSP00000309831 |
| ENSP00000261531 | ENSP00000309871 |
| ENSP00000261531 | ENSP00000310040 |
| ENSP00000261531 | ENSP00000310129 |
| ENSP00000261531 | ENSP00000310448 |
| ENSP00000261531 | ENSP00000310723 |
| ENSP00000261531 | ENSP00000310842 |
| ENSP00000261531 | ENSP00000311028 |
| ENSP00000261531 | ENSP00000311135 |

|                 |                 |
|-----------------|-----------------|
| ENSP00000261531 | ENSP00000311221 |
| ENSP00000261531 | ENSP00000311344 |
| ENSP00000261531 | ENSP00000311430 |
| ENSP00000261531 | ENSP00000311747 |
| ENSP00000261531 | ENSP00000312042 |
| ENSP00000261531 | ENSP00000312066 |
| ENSP00000261531 | ENSP00000312697 |
| ENSP00000261531 | ENSP00000312981 |
| ENSP00000261531 | ENSP00000313420 |
| ENSP00000261531 | ENSP00000313829 |
| ENSP00000261531 | ENSP00000314949 |
| ENSP00000261531 | ENSP00000315791 |
| ENSP00000261531 | ENSP00000316240 |
| ENSP00000261531 | ENSP00000317334 |
| ENSP00000261531 | ENSP00000317985 |
| ENSP00000261531 | ENSP00000318195 |
| ENSP00000261531 | ENSP00000318641 |
| ENSP00000261531 | ENSP00000318861 |
| ENSP00000261531 | ENSP00000320485 |
| ENSP00000261531 | ENSP00000320949 |
| ENSP00000261531 | ENSP00000321706 |
| ENSP00000261531 | ENSP00000322016 |
| ENSP00000261531 | ENSP00000322570 |
| ENSP00000261531 | ENSP00000323377 |
| ENSP00000261531 | ENSP00000323856 |
| ENSP00000261531 | ENSP00000323967 |
| ENSP00000261531 | ENSP00000325002 |
| ENSP00000261531 | ENSP00000325017 |
| ENSP00000261531 | ENSP00000325120 |
| ENSP00000261531 | ENSP00000325376 |
| ENSP00000261531 | ENSP00000325377 |
| ENSP00000261531 | ENSP00000325863 |
| ENSP00000261531 | ENSP00000326261 |
| ENSP00000261531 | ENSP00000326514 |
| ENSP00000261531 | ENSP00000326603 |
| ENSP00000261531 | ENSP00000326806 |
| ENSP00000261531 | ENSP00000327650 |
| ENSP00000261531 | ENSP00000328992 |
| ENSP00000261531 | ENSP00000329419 |
| ENSP00000261531 | ENSP00000329466 |
| ENSP00000261531 | ENSP00000329715 |
| ENSP00000261531 | ENSP00000330343 |
| ENSP00000261531 | ENSP00000331310 |
| ENSP00000261531 | ENSP00000331678 |
| ENSP00000261531 | ENSP00000331907 |
| ENSP00000261531 | ENSP00000332103 |



|                 |                 |
|-----------------|-----------------|
| ENSP00000261531 | ENSP00000332681 |
| ENSP00000261531 | ENSP00000334100 |
| ENSP00000261531 | ENSP00000334148 |
| ENSP00000261531 | ENSP00000335321 |
| ENSP00000261531 | ENSP00000336712 |
| ENSP00000261531 | ENSP00000336752 |
| ENSP00000261531 | ENSP00000337088 |
| ENSP00000261531 | ENSP00000338862 |
| ENSP00000261531 | ENSP00000339109 |
| ENSP00000261531 | ENSP00000339353 |
| ENSP00000261531 | ENSP00000339495 |
| ENSP00000261531 | ENSP00000339587 |
| ENSP00000261531 | ENSP00000339723 |
| ENSP00000261531 | ENSP00000340019 |
| ENSP00000261531 | ENSP00000340281 |
| ENSP00000261531 | ENSP00000340796 |
| ENSP00000261531 | ENSP00000341382 |
| ENSP00000261531 | ENSP00000341551 |
| ENSP00000261531 | ENSP00000342181 |
| ENSP00000261531 | ENSP00000342300 |
| ENSP00000261531 | ENSP00000342905 |
| ENSP00000261531 | ENSP00000343557 |
| ENSP00000261531 | ENSP00000343701 |
| ENSP00000261531 | ENSP00000343741 |
| ENSP00000261531 | ENSP00000346088 |
| ENSP00000261531 | ENSP00000346120 |
| ENSP00000261531 | ENSP00000346236 |
| ENSP00000261531 | ENSP00000346566 |
| ENSP00000261531 | ENSP00000346634 |
| ENSP00000261531 | ENSP00000346762 |
| ENSP00000261531 | ENSP00000347232 |
| ENSP00000261531 | ENSP00000347379 |
| ENSP00000261531 | ENSP00000348442 |
| ENSP00000261531 | ENSP00000348510 |
| ENSP00000261531 | ENSP00000348551 |
| ENSP00000261531 | ENSP00000348554 |
| ENSP00000261531 | ENSP00000348565 |
| ENSP00000261531 | ENSP00000348577 |
| ENSP00000261531 | ENSP00000348708 |
| ENSP00000261531 | ENSP00000348965 |
| ENSP00000261531 | ENSP00000349049 |
| ENSP00000261531 | ENSP00000349205 |
| ENSP00000261531 | ENSP00000349213 |
| ENSP00000261531 | ENSP00000349748 |
| ENSP00000261531 | ENSP00000349977 |
| ENSP00000261531 | ENSP00000350199 |

|                 |                 |
|-----------------|-----------------|
| ENSP00000261531 | ENSP00000350512 |
| ENSP00000261531 | ENSP00000351137 |
| ENSP00000261531 | ENSP00000351552 |
| ENSP00000261531 | ENSP00000351947 |
| ENSP00000261531 | ENSP00000352047 |
| ENSP00000261531 | ENSP00000352257 |
| ENSP00000261531 | ENSP00000352308 |
| ENSP00000261531 | ENSP00000352408 |
| ENSP00000261531 | ENSP00000352678 |
| ENSP00000261531 | ENSP00000352738 |
| ENSP00000261531 | ENSP00000353458 |
| ENSP00000261531 | ENSP00000353622 |
| ENSP00000261531 | ENSP00000353741 |
| ENSP00000261531 | ENSP00000354040 |
| ENSP00000261531 | ENSP00000354061 |
| ENSP00000261531 | ENSP00000354346 |
| ENSP00000261531 | ENSP00000354518 |
| ENSP00000261531 | ENSP00000354720 |
| ENSP00000261531 | ENSP00000354739 |
| ENSP00000261531 | ENSP00000354742 |
| ENSP00000261531 | ENSP00000354791 |
| ENSP00000261531 | ENSP00000354848 |
| ENSP00000261531 | ENSP00000354851 |
| ENSP00000261531 | ENSP00000354920 |
| ENSP00000261531 | ENSP00000355011 |
| ENSP00000261531 | ENSP00000355050 |
| ENSP00000261531 | ENSP00000355809 |
| ENSP00000261531 | ENSP00000356405 |
| ENSP00000261531 | ENSP00000356520 |
| ENSP00000261531 | ENSP00000356811 |
| ENSP00000261531 | ENSP00000357048 |
| ENSP00000261531 | ENSP00000357283 |
| ENSP00000261531 | ENSP00000357631 |
| ENSP00000261531 | ENSP00000358400 |
| ENSP00000261531 | ENSP00000358417 |
| ENSP00000261531 | ENSP00000358554 |
| ENSP00000261531 | ENSP00000358799 |
| ENSP00000261531 | ENSP00000359552 |
| ENSP00000261531 | ENSP00000359988 |
| ENSP00000261531 | ENSP00000360183 |
| ENSP00000261531 | ENSP00000360286 |
| ENSP00000261531 | ENSP00000360532 |
| ENSP00000261531 | ENSP00000360676 |
| ENSP00000261531 | ENSP00000360916 |
| ENSP00000261531 | ENSP00000361076 |
| ENSP00000261531 | ENSP00000361180 |

|                 |                 |
|-----------------|-----------------|
| ENSP00000261531 | ENSP00000361219 |
| ENSP00000261531 | ENSP00000361465 |
| ENSP00000261531 | ENSP00000361577 |
| ENSP00000261531 | ENSP00000361824 |
| ENSP00000261531 | ENSP00000362041 |
| ENSP00000261531 | ENSP00000362110 |
| ENSP00000261531 | ENSP00000362441 |
| ENSP00000261531 | ENSP00000362688 |
| ENSP00000261531 | ENSP00000362820 |
| ENSP00000261531 | ENSP00000363313 |
| ENSP00000261531 | ENSP00000363745 |
| ENSP00000261531 | ENSP00000364119 |
| ENSP00000261531 | ENSP00000364289 |
| ENSP00000261531 | ENSP00000365439 |
| ENSP00000261531 | ENSP00000365735 |
| ENSP00000261531 | ENSP00000366135 |
| ENSP00000261531 | ENSP00000366179 |
| ENSP00000261531 | ENSP00000366557 |
| ENSP00000261531 | ENSP00000366829 |
| ENSP00000261531 | ENSP00000367208 |
| ENSP00000261531 | ENSP00000367263 |
| ENSP00000261531 | ENSP00000367498 |
| ENSP00000261531 | ENSP00000367797 |
| ENSP00000261531 | ENSP00000367835 |
| ENSP00000261531 | ENSP00000368523 |
| ENSP00000261531 | ENSP00000369100 |
| ENSP00000261531 | ENSP00000369162 |
| ENSP00000261531 | ENSP00000369218 |
| ENSP00000261531 | ENSP00000369411 |
| ENSP00000261531 | ENSP00000369716 |
| ENSP00000261531 | ENSP00000370119 |
| ENSP00000261531 | ENSP00000370517 |
| ENSP00000261531 | ENSP00000371419 |
| ENSP00000261531 | ENSP00000371451 |
| ENSP00000261531 | ENSP00000372689 |
| ENSP00000261531 | ENSP00000374455 |
| ENSP00000261531 | ENSP00000376309 |
| ENSP00000261531 | ENSP00000376973 |
| ENSP00000261531 | ENSP00000378350 |
| ENSP00000261531 | ENSP00000379607 |
| ENSP00000261531 | ENSP00000380336 |
| ENSP00000261531 | ENSP00000381293 |
| ENSP00000261531 | ENSP00000381565 |
| ENSP00000261531 | ENSP00000382281 |
| ENSP00000261531 | ENSP00000382562 |
| ENSP00000261531 | ENSP00000382779 |

|                 |                 |
|-----------------|-----------------|
| ENSP00000261531 | ENSP00000384048 |
| ENSP00000261531 | ENSP00000385722 |
| ENSP00000261531 | ENSP00000386717 |
| ENSP00000261531 | ENSP00000387006 |
| ENSP00000261531 | ENSP00000388464 |
| ENSP00000261531 | ENSP00000389103 |
| ENSP00000261531 | ENSP00000389934 |
| ENSP00000261531 | ENSP00000391249 |
| ENSP00000261531 | ENSP00000392028 |
| ENSP00000261531 | ENSP00000392270 |
| ENSP00000261531 | ENSP00000392601 |
| ENSP00000261531 | ENSP00000394316 |
| ENSP00000261531 | ENSP00000396301 |
| ENSP00000261531 | ENSP00000396439 |
| ENSP00000261531 | ENSP00000396876 |
| ENSP00000261531 | ENSP00000396937 |
| ENSP00000261531 | ENSP00000398597 |
| ENSP00000261531 | ENSP00000399968 |
| ENSP00000261531 | ENSP00000404121 |
| ENSP00000261531 | ENSP00000404623 |
| ENSP00000261531 | ENSP00000407487 |
| ENSP00000261531 | ENSP00000408910 |
| ENSP00000261531 | ENSP00000410772 |
| ENSP00000261531 | ENSP00000412553 |
| ENSP00000261531 | ENSP00000412566 |
| ENSP00000261531 | ENSP00000416110 |
| ENSP00000261531 | ENSP00000416892 |
| ENSP00000261531 | ENSP00000416959 |
| ENSP00000261534 | ENSP00000278243 |
| ENSP00000261534 | ENSP00000286091 |
| ENSP00000261534 | ENSP00000299626 |
| ENSP00000261534 | ENSP00000300658 |
| ENSP00000261534 | ENSP00000314615 |
| ENSP00000261534 | ENSP00000346809 |
| ENSP00000261534 | ENSP00000349877 |
| ENSP00000261534 | ENSP00000355963 |
| ENSP00000261534 | ENSP00000359305 |
| ENSP00000261534 | ENSP00000360149 |
| ENSP00000261534 | ENSP00000360473 |
| ENSP00000261534 | ENSP00000360644 |
| ENSP00000261534 | ENSP00000364188 |
| ENSP00000261534 | ENSP00000366395 |
| ENSP00000261534 | ENSP00000415203 |
| ENSP00000261534 | ENSP00000417748 |
| ENSP00000261558 | ENSP00000269122 |
| ENSP00000261558 | ENSP00000294543 |

|                 |                 |
|-----------------|-----------------|
| ENSP00000261558 | ENSP00000325369 |
| ENSP00000261558 | ENSP00000347408 |
| ENSP00000261558 | ENSP00000351926 |
| ENSP00000261558 | ENSP00000356146 |
| ENSP00000261558 | ENSP00000360798 |
| ENSP00000261558 | ENSP00000365891 |
| ENSP00000261584 | ENSP00000286800 |
| ENSP00000261584 | ENSP00000295897 |
| ENSP00000261584 | ENSP00000323050 |
| ENSP00000261584 | ENSP00000326819 |
| ENSP00000261584 | ENSP00000331310 |
| ENSP00000261584 | ENSP00000350283 |
| ENSP00000261584 | ENSP00000369497 |
| ENSP00000261590 | ENSP00000294785 |
| ENSP00000261590 | ENSP00000296084 |
| ENSP00000261590 | ENSP00000326366 |
| ENSP00000261590 | ENSP00000331678 |
| ENSP00000261592 | ENSP00000310440 |
| ENSP00000261592 | ENSP00000311825 |
| ENSP00000261592 | ENSP00000319597 |
| ENSP00000261592 | ENSP00000379607 |
| ENSP00000261593 | ENSP00000294008 |
| ENSP00000261593 | ENSP00000302120 |
| ENSP00000261593 | ENSP00000354951 |
| ENSP00000261596 | ENSP00000264005 |
| ENSP00000261596 | ENSP00000266095 |
| ENSP00000261596 | ENSP00000269143 |
| ENSP00000261596 | ENSP00000285518 |
| ENSP00000261596 | ENSP00000290231 |
| ENSP00000261596 | ENSP00000296786 |
| ENSP00000261596 | ENSP00000310551 |
| ENSP00000261596 | ENSP00000314036 |
| ENSP00000261596 | ENSP00000316032 |
| ENSP00000261596 | ENSP00000318115 |
| ENSP00000261596 | ENSP00000321711 |
| ENSP00000261596 | ENSP00000332258 |
| ENSP00000261596 | ENSP00000337463 |
| ENSP00000261596 | ENSP00000348577 |
| ENSP00000261596 | ENSP00000356591 |
| ENSP00000261596 | ENSP00000361667 |
| ENSP00000261596 | ENSP00000369862 |
| ENSP00000261596 | ENSP00000371155 |
| ENSP00000261596 | ENSP00000380184 |
| ENSP00000261596 | ENSP00000395863 |
| ENSP00000261596 | ENSP00000401287 |
| ENSP00000261596 | ENSP00000413405 |

|                 |                 |
|-----------------|-----------------|
| ENSP00000261597 | ENSP00000262056 |
| ENSP00000261597 | ENSP00000262059 |
| ENSP00000261597 | ENSP00000263202 |
| ENSP00000261597 | ENSP00000263710 |
| ENSP00000261597 | ENSP00000265056 |
| ENSP00000261597 | ENSP00000265148 |
| ENSP00000261597 | ENSP00000265465 |
| ENSP00000261597 | ENSP00000267163 |
| ENSP00000261597 | ENSP00000270861 |
| ENSP00000261597 | ENSP00000271452 |
| ENSP00000261597 | ENSP00000273398 |
| ENSP00000261597 | ENSP00000274289 |
| ENSP00000261597 | ENSP00000282074 |
| ENSP00000261597 | ENSP00000283006 |
| ENSP00000261597 | ENSP00000285116 |
| ENSP00000261597 | ENSP00000295030 |
| ENSP00000261597 | ENSP00000295685 |
| ENSP00000261597 | ENSP00000296509 |
| ENSP00000261597 | ENSP00000302530 |
| ENSP00000261597 | ENSP00000305459 |
| ENSP00000261597 | ENSP00000312870 |
| ENSP00000261597 | ENSP00000336868 |
| ENSP00000261597 | ENSP00000339503 |
| ENSP00000261597 | ENSP00000345793 |
| ENSP00000261597 | ENSP00000346566 |
| ENSP00000261597 | ENSP00000351665 |
| ENSP00000261597 | ENSP00000354791 |
| ENSP00000261597 | ENSP00000355944 |
| ENSP00000261597 | ENSP00000360329 |
| ENSP00000261597 | ENSP00000360532 |
| ENSP00000261597 | ENSP00000362110 |
| ENSP00000261597 | ENSP00000363055 |
| ENSP00000261597 | ENSP00000367034 |
| ENSP00000261597 | ENSP00000369075 |
| ENSP00000261597 | ENSP00000370408 |
| ENSP00000261597 | ENSP00000370557 |
| ENSP00000261597 | ENSP00000382562 |
| ENSP00000261597 | ENSP00000397441 |
| ENSP00000261597 | ENSP00000413632 |
| ENSP00000261597 | ENSP00000419628 |
| ENSP00000261600 | ENSP00000267163 |
| ENSP00000261600 | ENSP00000295899 |
| ENSP00000261600 | ENSP00000299608 |
| ENSP00000261600 | ENSP00000318861 |
| ENSP00000261600 | ENSP00000326531 |
| ENSP00000261600 | ENSP00000341805 |

|                 |                 |
|-----------------|-----------------|
| ENSP00000261600 | ENSP00000347592 |
| ENSP00000261600 | ENSP00000360488 |
| ENSP00000261600 | ENSP00000380969 |
| ENSP00000261600 | ENSP00000396301 |
| ENSP00000261601 | ENSP00000261609 |
| ENSP00000261601 | ENSP00000261712 |
| ENSP00000261601 | ENSP00000262193 |
| ENSP00000261601 | ENSP00000262315 |
| ENSP00000261601 | ENSP00000262518 |
| ENSP00000261601 | ENSP00000262854 |
| ENSP00000261601 | ENSP00000263208 |
| ENSP00000261601 | ENSP00000264515 |
| ENSP00000261601 | ENSP00000264552 |
| ENSP00000261601 | ENSP00000264639 |
| ENSP00000261601 | ENSP00000265073 |
| ENSP00000261601 | ENSP00000265351 |
| ENSP00000261601 | ENSP00000265990 |
| ENSP00000261601 | ENSP00000268616 |
| ENSP00000261601 | ENSP00000272645 |
| ENSP00000261601 | ENSP00000273064 |
| ENSP00000261601 | ENSP00000283351 |
| ENSP00000261601 | ENSP00000283943 |
| ENSP00000261601 | ENSP00000288774 |
| ENSP00000261601 | ENSP00000289081 |
| ENSP00000261601 | ENSP00000290810 |
| ENSP00000261601 | ENSP00000295066 |
| ENSP00000261601 | ENSP00000295901 |
| ENSP00000261601 | ENSP00000296273 |
| ENSP00000261601 | ENSP00000296792 |
| ENSP00000261601 | ENSP00000298852 |
| ENSP00000261601 | ENSP00000300648 |
| ENSP00000261601 | ENSP00000301962 |
| ENSP00000261601 | ENSP00000302239 |
| ENSP00000261601 | ENSP00000302530 |
| ENSP00000261601 | ENSP00000304593 |
| ENSP00000261601 | ENSP00000309198 |
| ENSP00000261601 | ENSP00000309474 |
| ENSP00000261601 | ENSP00000310129 |
| ENSP00000261601 | ENSP00000310590 |
| ENSP00000261601 | ENSP00000311665 |
| ENSP00000261601 | ENSP00000314311 |
| ENSP00000261601 | ENSP00000320566 |
| ENSP00000261601 | ENSP00000321711 |
| ENSP00000261601 | ENSP00000322242 |
| ENSP00000261601 | ENSP00000323687 |
| ENSP00000261601 | ENSP00000325677 |

|                 |                 |
|-----------------|-----------------|
| ENSP00000261601 | ENSP00000331310 |
| ENSP00000261601 | ENSP00000333376 |
| ENSP00000261601 | ENSP00000334808 |
| ENSP00000261601 | ENSP00000337405 |
| ENSP00000261601 | ENSP00000337839 |
| ENSP00000261601 | ENSP00000340596 |
| ENSP00000261601 | ENSP00000343535 |
| ENSP00000261601 | ENSP00000345530 |
| ENSP00000261601 | ENSP00000347836 |
| ENSP00000261601 | ENSP00000348442 |
| ENSP00000261601 | ENSP00000350009 |
| ENSP00000261601 | ENSP00000350512 |
| ENSP00000261601 | ENSP00000350708 |
| ENSP00000261601 | ENSP00000350967 |
| ENSP00000261601 | ENSP00000351596 |
| ENSP00000261601 | ENSP00000351947 |
| ENSP00000261601 | ENSP00000353622 |
| ENSP00000261601 | ENSP00000353793 |
| ENSP00000261601 | ENSP00000354558 |
| ENSP00000261601 | ENSP00000354673 |
| ENSP00000261601 | ENSP00000355205 |
| ENSP00000261601 | ENSP00000356405 |
| ENSP00000261601 | ENSP00000356989 |
| ENSP00000261601 | ENSP00000358400 |
| ENSP00000261601 | ENSP00000360116 |
| ENSP00000261601 | ENSP00000362334 |
| ENSP00000261601 | ENSP00000363779 |
| ENSP00000261601 | ENSP00000364929 |
| ENSP00000261601 | ENSP00000366135 |
| ENSP00000261601 | ENSP00000374213 |
| ENSP00000261601 | ENSP00000374280 |
| ENSP00000261601 | ENSP00000380460 |
| ENSP00000261601 | ENSP00000381045 |
| ENSP00000261601 | ENSP00000381863 |
| ENSP00000261601 | ENSP00000381891 |
| ENSP00000261601 | ENSP00000382269 |
| ENSP00000261601 | ENSP00000382779 |
| ENSP00000261601 | ENSP00000384211 |
| ENSP00000261601 | ENSP00000396937 |
| ENSP00000261601 | ENSP00000401445 |
| ENSP00000261609 | ENSP00000262850 |
| ENSP00000261609 | ENSP00000301962 |
| ENSP00000261609 | ENSP00000312995 |
| ENSP00000261609 | ENSP00000320898 |
| ENSP00000261609 | ENSP00000323099 |
| ENSP00000261609 | ENSP00000329466 |



|                 |                 |
|-----------------|-----------------|
| ENSP00000261609 | ENSP00000334808 |
| ENSP00000261609 | ENSP00000348577 |
| ENSP00000261609 | ENSP00000350283 |
| ENSP00000261609 | ENSP00000352676 |
| ENSP00000261609 | ENSP00000355596 |
| ENSP00000261609 | ENSP00000362578 |
| ENSP00000261609 | ENSP00000364270 |
| ENSP00000261609 | ENSP00000373060 |
| ENSP00000261609 | ENSP00000381045 |
| ENSP00000261609 | ENSP00000381863 |
| ENSP00000261609 | ENSP00000406490 |
| ENSP00000261623 | ENSP00000321239 |
| ENSP00000261623 | ENSP00000356505 |
| ENSP00000261623 | ENSP00000380450 |
| ENSP00000261637 | ENSP00000261708 |
| ENSP00000261637 | ENSP00000263187 |
| ENSP00000261637 | ENSP00000263657 |
| ENSP00000261637 | ENSP00000263795 |
| ENSP00000261637 | ENSP00000264995 |
| ENSP00000261637 | ENSP00000270625 |
| ENSP00000261637 | ENSP00000272418 |
| ENSP00000261637 | ENSP00000272521 |
| ENSP00000261637 | ENSP00000291576 |
| ENSP00000261637 | ENSP00000296792 |
| ENSP00000261637 | ENSP00000296802 |
| ENSP00000261637 | ENSP00000297579 |
| ENSP00000261637 | ENSP00000297990 |
| ENSP00000261637 | ENSP00000300151 |
| ENSP00000261637 | ENSP00000302896 |
| ENSP00000261637 | ENSP00000308179 |
| ENSP00000261637 | ENSP00000310596 |
| ENSP00000261637 | ENSP00000311135 |
| ENSP00000261637 | ENSP00000314193 |
| ENSP00000261637 | ENSP00000315674 |
| ENSP00000261637 | ENSP00000318646 |
| ENSP00000261637 | ENSP00000324122 |
| ENSP00000261637 | ENSP00000326981 |
| ENSP00000261637 | ENSP00000327179 |
| ENSP00000261637 | ENSP00000328854 |
| ENSP00000261637 | ENSP00000329466 |
| ENSP00000261637 | ENSP00000331907 |
| ENSP00000261637 | ENSP00000339095 |
| ENSP00000261637 | ENSP00000341885 |
| ENSP00000261637 | ENSP00000346015 |
| ENSP00000261637 | ENSP00000349274 |
| ENSP00000261637 | ENSP00000353741 |

|                 |                 |
|-----------------|-----------------|
| ENSP00000261637 | ENSP00000355471 |
| ENSP00000261637 | ENSP00000355541 |
| ENSP00000261637 | ENSP00000356134 |
| ENSP00000261637 | ENSP00000356520 |
| ENSP00000261637 | ENSP00000358812 |
| ENSP00000261637 | ENSP00000359688 |
| ENSP00000261637 | ENSP00000360031 |
| ENSP00000261637 | ENSP00000363642 |
| ENSP00000261637 | ENSP00000363746 |
| ENSP00000261637 | ENSP00000366557 |
| ENSP00000261637 | ENSP00000366974 |
| ENSP00000261637 | ENSP00000368984 |
| ENSP00000261637 | ENSP00000370589 |
| ENSP00000261637 | ENSP00000371101 |
| ENSP00000261637 | ENSP00000371169 |
| ENSP00000261637 | ENSP00000372695 |
| ENSP00000261637 | ENSP00000379888 |
| ENSP00000261637 | ENSP00000384302 |
| ENSP00000261637 | ENSP00000399454 |
| ENSP00000261637 | ENSP00000402869 |
| ENSP00000261637 | ENSP00000405614 |
| ENSP00000261637 | ENSP00000410396 |
| ENSP00000261637 | ENSP00000414006 |
| ENSP00000261643 | ENSP00000293195 |
| ENSP00000261643 | ENSP00000299335 |
| ENSP00000261643 | ENSP00000354499 |
| ENSP00000261643 | ENSP00000361042 |
| ENSP00000261647 | ENSP00000276201 |
| ENSP00000261647 | ENSP00000299084 |
| ENSP00000261647 | ENSP00000299238 |
| ENSP00000261647 | ENSP00000338413 |
| ENSP00000261652 | ENSP00000297156 |
| ENSP00000261652 | ENSP00000355958 |
| ENSP00000261652 | ENSP00000358997 |
| ENSP00000261652 | ENSP00000365048 |
| ENSP00000261658 | ENSP00000286186 |
| ENSP00000261658 | ENSP00000329623 |
| ENSP00000261658 | ENSP00000360116 |
| ENSP00000261658 | ENSP00000389277 |
| ENSP00000261660 | ENSP00000272322 |
| ENSP00000261660 | ENSP00000273398 |
| ENSP00000261660 | ENSP00000314499 |
| ENSP00000261660 | ENSP00000350249 |
| ENSP00000261674 | ENSP00000304704 |
| ENSP00000261674 | ENSP00000315859 |
| ENSP00000261674 | ENSP00000326261 |

|                 |                 |
|-----------------|-----------------|
| ENSP00000261674 | ENSP00000339723 |
| ENSP00000261674 | ENSP00000358242 |
| ENSP00000261674 | ENSP00000394085 |
| ENSP00000261693 | ENSP00000314508 |
| ENSP00000261693 | ENSP00000356969 |
| ENSP00000261693 | ENSP00000407401 |
| ENSP00000261700 | ENSP00000308546 |
| ENSP00000261700 | ENSP00000314949 |
| ENSP00000261700 | ENSP00000346120 |
| ENSP00000261700 | ENSP00000350708 |
| ENSP00000261700 | ENSP00000355596 |
| ENSP00000261700 | ENSP00000379607 |
| ENSP00000261708 | ENSP00000263576 |
| ENSP00000261708 | ENSP00000263657 |
| ENSP00000261708 | ENSP00000267425 |
| ENSP00000261708 | ENSP00000268482 |
| ENSP00000261708 | ENSP00000272521 |
| ENSP00000261708 | ENSP00000288828 |
| ENSP00000261708 | ENSP00000291576 |
| ENSP00000261708 | ENSP00000295373 |
| ENSP00000261708 | ENSP00000296792 |
| ENSP00000261708 | ENSP00000296802 |
| ENSP00000261708 | ENSP00000297579 |
| ENSP00000261708 | ENSP00000297990 |
| ENSP00000261708 | ENSP00000302896 |
| ENSP00000261708 | ENSP00000308179 |
| ENSP00000261708 | ENSP00000311135 |
| ENSP00000261708 | ENSP00000314193 |
| ENSP00000261708 | ENSP00000314348 |
| ENSP00000261708 | ENSP00000315674 |
| ENSP00000261708 | ENSP00000323858 |
| ENSP00000261708 | ENSP00000324122 |
| ENSP00000261708 | ENSP00000326981 |
| ENSP00000261708 | ENSP00000327179 |
| ENSP00000261708 | ENSP00000328690 |
| ENSP00000261708 | ENSP00000328854 |
| ENSP00000261708 | ENSP00000329466 |
| ENSP00000261708 | ENSP00000331817 |
| ENSP00000261708 | ENSP00000331907 |
| ENSP00000261708 | ENSP00000332340 |
| ENSP00000261708 | ENSP00000339095 |
| ENSP00000261708 | ENSP00000346120 |
| ENSP00000261708 | ENSP00000348848 |
| ENSP00000261708 | ENSP00000355471 |
| ENSP00000261708 | ENSP00000355541 |
| ENSP00000261708 | ENSP00000356134 |

|                 |                 |
|-----------------|-----------------|
| ENSP00000261708 | ENSP00000356520 |
| ENSP00000261708 | ENSP00000358716 |
| ENSP00000261708 | ENSP00000358812 |
| ENSP00000261708 | ENSP00000359688 |
| ENSP00000261708 | ENSP00000360828 |
| ENSP00000261708 | ENSP00000361232 |
| ENSP00000261708 | ENSP00000362744 |
| ENSP00000261708 | ENSP00000363642 |
| ENSP00000261708 | ENSP00000363746 |
| ENSP00000261708 | ENSP00000364119 |
| ENSP00000261708 | ENSP00000364320 |
| ENSP00000261708 | ENSP00000366557 |
| ENSP00000261708 | ENSP00000370589 |
| ENSP00000261708 | ENSP00000371101 |
| ENSP00000261708 | ENSP00000372695 |
| ENSP00000261708 | ENSP00000379888 |
| ENSP00000261708 | ENSP00000380495 |
| ENSP00000261708 | ENSP00000384302 |
| ENSP00000261708 | ENSP00000387303 |
| ENSP00000261708 | ENSP00000392601 |
| ENSP00000261708 | ENSP00000399454 |
| ENSP00000261708 | ENSP00000402338 |
| ENSP00000261708 | ENSP00000402869 |
| ENSP00000261708 | ENSP00000405614 |
| ENSP00000261708 | ENSP00000410396 |
| ENSP00000261712 | ENSP00000262193 |
| ENSP00000261712 | ENSP00000262320 |
| ENSP00000261712 | ENSP00000264515 |
| ENSP00000261712 | ENSP00000264639 |
| ENSP00000261712 | ENSP00000265990 |
| ENSP00000261712 | ENSP00000276326 |
| ENSP00000261712 | ENSP00000282516 |
| ENSP00000261712 | ENSP00000290541 |
| ENSP00000261712 | ENSP00000295066 |
| ENSP00000261712 | ENSP00000295901 |
| ENSP00000261712 | ENSP00000296543 |
| ENSP00000261712 | ENSP00000296786 |
| ENSP00000261712 | ENSP00000298852 |
| ENSP00000261712 | ENSP00000298910 |
| ENSP00000261712 | ENSP00000299259 |
| ENSP00000261712 | ENSP00000300413 |
| ENSP00000261712 | ENSP00000309474 |
| ENSP00000261712 | ENSP00000310129 |
| ENSP00000261712 | ENSP00000311665 |
| ENSP00000261712 | ENSP00000319977 |
| ENSP00000261712 | ENSP00000321711 |

|                 |                 |
|-----------------|-----------------|
| ENSP00000261712 | ENSP00000328940 |
| ENSP00000261712 | ENSP00000341243 |
| ENSP00000261712 | ENSP00000341551 |
| ENSP00000261712 | ENSP00000348442 |
| ENSP00000261712 | ENSP00000349970 |
| ENSP00000261712 | ENSP00000350708 |
| ENSP00000261712 | ENSP00000351947 |
| ENSP00000261712 | ENSP00000356130 |
| ENSP00000261712 | ENSP00000357980 |
| ENSP00000261712 | ENSP00000360532 |
| ENSP00000261712 | ENSP00000362306 |
| ENSP00000261712 | ENSP00000362334 |
| ENSP00000261712 | ENSP00000362413 |
| ENSP00000261712 | ENSP00000384211 |
| ENSP00000261712 | ENSP00000386212 |
| ENSP00000261712 | ENSP00000396937 |
| ENSP00000261714 | ENSP00000272252 |
| ENSP00000261714 | ENSP00000274030 |
| ENSP00000261714 | ENSP00000276326 |
| ENSP00000261714 | ENSP00000284981 |
| ENSP00000261714 | ENSP00000294189 |
| ENSP00000261714 | ENSP00000339299 |
| ENSP00000261714 | ENSP00000356591 |
| ENSP00000261714 | ENSP00000363162 |
| ENSP00000261714 | ENSP00000363676 |
| ENSP00000261714 | ENSP00000366746 |
| ENSP00000261714 | ENSP00000368119 |
| ENSP00000261714 | ENSP00000368797 |
| ENSP00000261714 | ENSP00000379607 |
| ENSP00000261714 | ENSP00000390783 |
| ENSP00000261714 | ENSP00000408058 |
| ENSP00000261735 | ENSP00000379607 |
| ENSP00000261740 | ENSP00000263246 |
| ENSP00000261740 | ENSP00000299163 |
| ENSP00000261740 | ENSP00000344668 |
| ENSP00000261740 | ENSP00000379457 |
| ENSP00000261741 | ENSP00000267425 |
| ENSP00000261741 | ENSP00000291576 |
| ENSP00000261741 | ENSP00000297990 |
| ENSP00000261741 | ENSP00000308179 |
| ENSP00000261741 | ENSP00000308332 |
| ENSP00000261741 | ENSP00000314441 |
| ENSP00000261741 | ENSP00000317992 |
| ENSP00000261741 | ENSP00000320917 |
| ENSP00000261741 | ENSP00000321449 |
| ENSP00000261741 | ENSP00000322396 |

|                 |                 |
|-----------------|-----------------|
| ENSP00000261741 | ENSP00000327179 |
| ENSP00000261741 | ENSP00000338862 |
| ENSP00000261741 | ENSP00000344393 |
| ENSP00000261741 | ENSP00000346453 |
| ENSP00000261741 | ENSP00000346725 |
| ENSP00000261741 | ENSP00000352021 |
| ENSP00000261741 | ENSP00000354040 |
| ENSP00000261741 | ENSP00000359688 |
| ENSP00000261741 | ENSP00000363642 |
| ENSP00000261741 | ENSP00000363746 |
| ENSP00000261741 | ENSP00000370736 |
| ENSP00000261741 | ENSP00000372695 |
| ENSP00000261741 | ENSP00000380982 |
| ENSP00000261741 | ENSP00000384302 |
| ENSP00000261741 | ENSP00000399454 |
| ENSP00000261741 | ENSP00000402338 |
| ENSP00000261741 | ENSP00000402869 |
| ENSP00000261741 | ENSP00000405614 |
| ENSP00000261741 | ENSP00000410396 |
| ENSP00000261745 | ENSP00000262962 |
| ENSP00000261745 | ENSP00000266095 |
| ENSP00000261745 | ENSP00000268661 |
| ENSP00000261745 | ENSP00000278572 |
| ENSP00000261745 | ENSP00000382177 |
| ENSP00000261745 | ENSP00000416583 |
| ENSP00000261745 | ENSP00000417763 |
| ENSP00000261755 | ENSP00000267430 |
| ENSP00000261755 | ENSP00000286070 |
| ENSP00000261755 | ENSP00000289081 |
| ENSP00000261755 | ENSP00000321636 |
| ENSP00000261755 | ENSP00000326819 |
| ENSP00000261755 | ENSP00000330875 |
| ENSP00000261755 | ENSP00000333283 |
| ENSP00000261755 | ENSP00000350283 |
| ENSP00000261755 | ENSP00000361824 |
| ENSP00000261755 | ENSP00000367910 |
| ENSP00000261755 | ENSP00000369274 |
| ENSP00000261755 | ENSP00000373952 |
| ENSP00000261755 | ENSP00000385021 |
| ENSP00000261758 | ENSP00000261868 |
| ENSP00000261758 | ENSP00000263377 |
| ENSP00000261758 | ENSP00000264389 |
| ENSP00000261758 | ENSP00000264705 |
| ENSP00000261758 | ENSP00000265350 |
| ENSP00000261758 | ENSP00000283195 |
| ENSP00000261758 | ENSP00000290158 |

|                 |                 |
|-----------------|-----------------|
| ENSP00000261758 | ENSP00000292035 |
| ENSP00000261758 | ENSP00000296411 |
| ENSP00000261758 | ENSP00000297145 |
| ENSP00000261758 | ENSP00000300291 |
| ENSP00000261758 | ENSP00000311766 |
| ENSP00000261758 | ENSP00000317790 |
| ENSP00000261758 | ENSP00000325612 |
| ENSP00000261758 | ENSP00000325690 |
| ENSP00000261758 | ENSP00000357047 |
| ENSP00000261758 | ENSP00000361824 |
| ENSP00000261758 | ENSP00000364320 |
| ENSP00000261758 | ENSP00000365439 |
| ENSP00000261758 | ENSP00000368226 |
| ENSP00000261758 | ENSP00000369411 |
| ENSP00000261758 | ENSP00000381216 |
| ENSP00000261758 | ENSP00000384048 |
| ENSP00000261758 | ENSP00000389277 |
| ENSP00000261776 | ENSP00000261842 |
| ENSP00000261776 | ENSP00000262039 |
| ENSP00000261776 | ENSP00000264380 |
| ENSP00000261776 | ENSP00000273398 |
| ENSP00000261776 | ENSP00000281141 |
| ENSP00000261776 | ENSP00000286448 |
| ENSP00000261776 | ENSP00000288828 |
| ENSP00000261776 | ENSP00000299138 |
| ENSP00000261776 | ENSP00000310521 |
| ENSP00000261776 | ENSP00000313490 |
| ENSP00000261776 | ENSP00000320758 |
| ENSP00000261776 | ENSP00000322957 |
| ENSP00000261776 | ENSP00000331817 |
| ENSP00000261776 | ENSP00000343741 |
| ENSP00000261776 | ENSP00000344220 |
| ENSP00000261776 | ENSP00000351926 |
| ENSP00000261776 | ENSP00000353741 |
| ENSP00000261776 | ENSP00000355231 |
| ENSP00000261776 | ENSP00000367079 |
| ENSP00000261776 | ENSP00000377148 |
| ENSP00000261776 | ENSP00000382177 |
| ENSP00000261776 | ENSP00000386759 |
| ENSP00000261776 | ENSP00000396937 |
| ENSP00000261783 | ENSP00000265537 |
| ENSP00000261783 | ENSP00000284637 |
| ENSP00000261783 | ENSP00000327509 |
| ENSP00000261783 | ENSP00000339186 |
| ENSP00000261783 | ENSP00000354347 |
| ENSP00000261783 | ENSP00000365811 |

|                 |                 |
|-----------------|-----------------|
| ENSP00000261783 | ENSP00000377954 |
| ENSP00000261796 | ENSP00000288167 |
| ENSP00000261813 | ENSP00000270708 |
| ENSP00000261813 | ENSP00000274255 |
| ENSP00000261813 | ENSP00000286428 |
| ENSP00000261813 | ENSP00000315859 |
| ENSP00000261813 | ENSP00000328938 |
| ENSP00000261813 | ENSP00000334188 |
| ENSP00000261813 | ENSP00000346037 |
| ENSP00000261813 | ENSP00000356989 |
| ENSP00000261813 | ENSP00000360473 |
| ENSP00000261813 | ENSP00000363313 |
| ENSP00000261813 | ENSP00000363734 |
| ENSP00000261813 | ENSP00000372694 |
| ENSP00000261813 | ENSP00000412319 |
| ENSP00000261813 | ENSP00000415678 |
| ENSP00000261819 | ENSP00000262030 |
| ENSP00000261819 | ENSP00000262144 |
| ENSP00000261819 | ENSP00000262367 |
| ENSP00000261819 | ENSP00000262608 |
| ENSP00000261819 | ENSP00000263208 |
| ENSP00000261819 | ENSP00000263228 |
| ENSP00000261819 | ENSP00000265351 |
| ENSP00000261819 | ENSP00000286800 |
| ENSP00000261819 | ENSP00000287598 |
| ENSP00000261819 | ENSP00000287878 |
| ENSP00000261819 | ENSP00000299381 |
| ENSP00000261819 | ENSP00000300648 |
| ENSP00000261819 | ENSP00000301019 |
| ENSP00000261819 | ENSP00000302790 |
| ENSP00000261819 | ENSP00000314004 |
| ENSP00000261819 | ENSP00000318775 |
| ENSP00000261819 | ENSP00000328720 |
| ENSP00000261819 | ENSP00000334061 |
| ENSP00000261819 | ENSP00000337340 |
| ENSP00000261819 | ENSP00000338157 |
| ENSP00000261819 | ENSP00000339109 |
| ENSP00000261819 | ENSP00000344741 |
| ENSP00000261819 | ENSP00000344936 |
| ENSP00000261819 | ENSP00000345530 |
| ENSP00000261819 | ENSP00000346987 |
| ENSP00000261819 | ENSP00000348554 |
| ENSP00000261819 | ENSP00000351947 |
| ENSP00000261819 | ENSP00000362592 |
| ENSP00000261819 | ENSP00000363322 |
| ENSP00000261819 | ENSP00000366953 |



|                 |                 |
|-----------------|-----------------|
| ENSP00000261819 | ENSP00000373060 |
| ENSP00000261819 | ENSP00000378350 |
| ENSP00000261819 | ENSP00000378529 |
| ENSP00000261819 | ENSP00000379228 |
| ENSP00000261819 | ENSP00000380921 |
| ENSP00000261819 | ENSP00000387982 |
| ENSP00000261819 | ENSP00000392985 |
| ENSP00000261819 | ENSP00000394394 |
| ENSP00000261833 | ENSP00000297338 |
| ENSP00000261833 | ENSP00000317985 |
| ENSP00000261833 | ENSP00000355596 |
| ENSP00000261833 | ENSP00000355731 |
| ENSP00000261833 | ENSP00000366603 |
| ENSP00000261842 | ENSP00000294543 |
| ENSP00000261842 | ENSP00000295897 |
| ENSP00000261842 | ENSP00000298229 |
| ENSP00000261842 | ENSP00000317431 |
| ENSP00000261842 | ENSP00000320543 |
| ENSP00000261842 | ENSP00000328773 |
| ENSP00000261842 | ENSP00000352603 |
| ENSP00000261842 | ENSP00000354519 |
| ENSP00000261842 | ENSP00000360777 |
| ENSP00000261842 | ENSP00000362115 |
| ENSP00000261842 | ENSP00000384534 |
| ENSP00000261844 | ENSP00000280098 |
| ENSP00000261845 | ENSP00000262982 |
| ENSP00000261845 | ENSP00000263688 |
| ENSP00000261845 | ENSP00000263791 |
| ENSP00000261845 | ENSP00000265000 |
| ENSP00000261845 | ENSP00000265073 |
| ENSP00000261845 | ENSP00000265354 |
| ENSP00000261845 | ENSP00000265960 |
| ENSP00000261845 | ENSP00000272542 |
| ENSP00000261845 | ENSP00000280772 |
| ENSP00000261845 | ENSP00000296328 |
| ENSP00000261845 | ENSP00000299601 |
| ENSP00000261845 | ENSP00000299767 |
| ENSP00000261845 | ENSP00000303315 |
| ENSP00000261845 | ENSP00000310649 |
| ENSP00000261845 | ENSP00000310701 |
| ENSP00000261845 | ENSP00000314949 |
| ENSP00000261845 | ENSP00000324444 |
| ENSP00000261845 | ENSP00000332444 |
| ENSP00000261845 | ENSP00000340019 |
| ENSP00000261845 | ENSP00000340879 |
| ENSP00000261845 | ENSP00000348986 |

|                 |                 |
|-----------------|-----------------|
| ENSP00000261845 | ENSP00000354558 |
| ENSP00000261845 | ENSP00000354916 |
| ENSP00000261845 | ENSP00000360621 |
| ENSP00000261845 | ENSP00000360644 |
| ENSP00000261845 | ENSP00000369042 |
| ENSP00000261845 | ENSP00000378306 |
| ENSP00000261845 | ENSP00000379372 |
| ENSP00000261845 | ENSP00000379607 |
| ENSP00000261845 | ENSP00000380129 |
| ENSP00000261845 | ENSP00000381045 |
| ENSP00000261845 | ENSP00000385083 |
| ENSP00000261867 | ENSP00000266095 |
| ENSP00000261867 | ENSP00000266980 |
| ENSP00000261867 | ENSP00000352655 |
| ENSP00000261868 | ENSP00000264883 |
| ENSP00000261868 | ENSP00000272645 |
| ENSP00000261868 | ENSP00000278572 |
| ENSP00000261868 | ENSP00000284995 |
| ENSP00000261868 | ENSP00000289371 |
| ENSP00000261868 | ENSP00000290158 |
| ENSP00000261868 | ENSP00000291688 |
| ENSP00000261868 | ENSP00000296577 |
| ENSP00000261868 | ENSP00000296674 |
| ENSP00000261868 | ENSP00000297325 |
| ENSP00000261868 | ENSP00000300146 |
| ENSP00000261868 | ENSP00000301788 |
| ENSP00000261868 | ENSP00000302886 |
| ENSP00000261868 | ENSP00000307684 |
| ENSP00000261868 | ENSP00000310040 |
| ENSP00000261868 | ENSP00000310596 |
| ENSP00000261868 | ENSP00000316879 |
| ENSP00000261868 | ENSP00000318604 |
| ENSP00000261868 | ENSP00000326806 |
| ENSP00000261868 | ENSP00000338862 |
| ENSP00000261868 | ENSP00000339881 |
| ENSP00000261868 | ENSP00000340281 |
| ENSP00000261868 | ENSP00000341885 |
| ENSP00000261868 | ENSP00000348722 |
| ENSP00000261868 | ENSP00000348965 |
| ENSP00000261868 | ENSP00000354125 |
| ENSP00000261868 | ENSP00000354522 |
| ENSP00000261868 | ENSP00000356548 |
| ENSP00000261868 | ENSP00000358140 |
| ENSP00000261868 | ENSP00000359518 |
| ENSP00000261868 | ENSP00000362576 |
| ENSP00000261868 | ENSP00000362688 |

|                 |                 |
|-----------------|-----------------|
| ENSP00000261868 | ENSP00000363391 |
| ENSP00000261868 | ENSP00000363559 |
| ENSP00000261868 | ENSP00000364289 |
| ENSP00000261868 | ENSP00000364320 |
| ENSP00000261868 | ENSP00000364847 |
| ENSP00000261868 | ENSP00000368927 |
| ENSP00000261868 | ENSP00000369038 |
| ENSP00000261868 | ENSP00000369042 |
| ENSP00000261868 | ENSP00000373918 |
| ENSP00000261868 | ENSP00000376758 |
| ENSP00000261868 | ENSP00000379888 |
| ENSP00000261868 | ENSP00000384015 |
| ENSP00000261868 | ENSP00000386992 |
| ENSP00000261875 | ENSP00000267750 |
| ENSP00000261875 | ENSP00000274311 |
| ENSP00000261875 | ENSP00000341213 |
| ENSP00000261875 | ENSP00000374455 |
| ENSP00000261880 | ENSP00000351926 |
| ENSP00000261880 | ENSP00000370258 |
| ENSP00000261881 | ENSP00000262315 |
| ENSP00000261881 | ENSP00000262460 |
| ENSP00000261881 | ENSP00000263201 |
| ENSP00000261881 | ENSP00000264926 |
| ENSP00000261881 | ENSP00000265056 |
| ENSP00000261881 | ENSP00000265465 |
| ENSP00000261881 | ENSP00000265728 |
| ENSP00000261881 | ENSP00000267430 |
| ENSP00000261881 | ENSP00000268043 |
| ENSP00000261881 | ENSP00000276533 |
| ENSP00000261881 | ENSP00000281543 |
| ENSP00000261881 | ENSP00000282516 |
| ENSP00000261881 | ENSP00000285873 |
| ENSP00000261881 | ENSP00000286428 |
| ENSP00000261881 | ENSP00000287598 |
| ENSP00000261881 | ENSP00000296273 |
| ENSP00000261881 | ENSP00000296509 |
| ENSP00000261881 | ENSP00000297338 |
| ENSP00000261881 | ENSP00000297431 |
| ENSP00000261881 | ENSP00000298139 |
| ENSP00000261881 | ENSP00000300249 |
| ENSP00000261881 | ENSP00000302530 |
| ENSP00000261881 | ENSP00000302955 |
| ENSP00000261881 | ENSP00000307853 |
| ENSP00000261881 | ENSP00000308699 |
| ENSP00000261881 | ENSP00000308944 |
| ENSP00000261881 | ENSP00000309457 |

|                 |                 |
|-----------------|-----------------|
| ENSP00000261881 | ENSP00000310520 |
| ENSP00000261881 | ENSP00000310668 |
| ENSP00000261881 | ENSP00000312870 |
| ENSP00000261881 | ENSP00000313171 |
| ENSP00000261881 | ENSP00000317039 |
| ENSP00000261881 | ENSP00000317636 |
| ENSP00000261881 | ENSP00000318977 |
| ENSP00000261881 | ENSP00000321636 |
| ENSP00000261881 | ENSP00000322180 |
| ENSP00000261881 | ENSP00000322570 |
| ENSP00000261881 | ENSP00000323663 |
| ENSP00000261881 | ENSP00000325017 |
| ENSP00000261881 | ENSP00000325863 |
| ENSP00000261881 | ENSP00000331879 |
| ENSP00000261881 | ENSP00000334188 |
| ENSP00000261881 | ENSP00000337405 |
| ENSP00000261881 | ENSP00000339145 |
| ENSP00000261881 | ENSP00000340879 |
| ENSP00000261881 | ENSP00000343392 |
| ENSP00000261881 | ENSP00000343741 |
| ENSP00000261881 | ENSP00000347232 |
| ENSP00000261881 | ENSP00000351697 |
| ENSP00000261881 | ENSP00000352738 |
| ENSP00000261881 | ENSP00000353793 |
| ENSP00000261881 | ENSP00000354522 |
| ENSP00000261881 | ENSP00000354720 |
| ENSP00000261881 | ENSP00000354972 |
| ENSP00000261881 | ENSP00000355890 |
| ENSP00000261881 | ENSP00000358478 |
| ENSP00000261881 | ENSP00000360473 |
| ENSP00000261881 | ENSP00000360621 |
| ENSP00000261881 | ENSP00000361465 |
| ENSP00000261881 | ENSP00000361707 |
| ENSP00000261881 | ENSP00000363021 |
| ENSP00000261881 | ENSP00000365588 |
| ENSP00000261881 | ENSP00000368349 |
| ENSP00000261881 | ENSP00000368438 |
| ENSP00000261881 | ENSP00000368976 |
| ENSP00000261881 | ENSP00000369335 |
| ENSP00000261881 | ENSP00000369411 |
| ENSP00000261881 | ENSP00000370151 |
| ENSP00000261881 | ENSP00000371475 |
| ENSP00000261881 | ENSP00000372023 |
| ENSP00000261881 | ENSP00000373060 |
| ENSP00000261881 | ENSP00000375809 |
| ENSP00000261881 | ENSP00000378529 |

|                 |                 |
|-----------------|-----------------|
| ENSP00000261881 | ENSP00000380129 |
| ENSP00000261881 | ENSP00000384048 |
| ENSP00000261881 | ENSP00000387429 |
| ENSP00000261881 | ENSP00000404318 |
| ENSP00000261881 | ENSP00000409167 |
| ENSP00000261884 | ENSP00000262367 |
| ENSP00000261884 | ENSP00000263205 |
| ENSP00000261884 | ENSP00000287820 |
| ENSP00000261884 | ENSP00000290663 |
| ENSP00000261884 | ENSP00000292035 |
| ENSP00000261884 | ENSP00000293777 |
| ENSP00000261884 | ENSP00000300651 |
| ENSP00000261884 | ENSP00000305502 |
| ENSP00000261884 | ENSP00000314949 |
| ENSP00000261884 | ENSP00000326767 |
| ENSP00000261884 | ENSP00000348610 |
| ENSP00000261884 | ENSP00000357047 |
| ENSP00000261884 | ENSP00000363193 |
| ENSP00000261884 | ENSP00000365588 |
| ENSP00000261884 | ENSP00000373060 |
| ENSP00000261884 | ENSP00000384048 |
| ENSP00000261884 | ENSP00000387429 |
| ENSP00000261884 | ENSP00000396484 |
| ENSP00000261884 | ENSP00000404318 |
| ENSP00000261884 | ENSP00000409167 |
| ENSP00000261884 | ENSP00000415212 |
| ENSP00000261884 | ENSP00000416511 |
| ENSP00000261908 | ENSP00000339299 |
| ENSP00000261908 | ENSP00000341189 |
| ENSP00000261908 | ENSP00000355809 |
| ENSP00000261908 | ENSP00000359345 |
| ENSP00000261908 | ENSP00000379607 |
| ENSP00000261908 | ENSP00000379712 |
| ENSP00000261908 | ENSP00000380942 |
| ENSP00000261908 | ENSP00000388373 |
| ENSP00000261908 | ENSP00000417229 |
| ENSP00000261917 | ENSP00000318351 |
| ENSP00000261917 | ENSP00000339191 |
| ENSP00000261917 | ENSP00000346725 |
| ENSP00000261917 | ENSP00000361465 |
| ENSP00000261917 | ENSP00000403852 |
| ENSP00000261921 | ENSP00000368253 |
| ENSP00000261937 | ENSP00000266037 |
| ENSP00000261937 | ENSP00000267101 |
| ENSP00000261937 | ENSP00000280193 |
| ENSP00000261937 | ENSP00000311005 |

|                 |                 |
|-----------------|-----------------|
| ENSP00000261937 | ENSP00000329219 |
| ENSP00000261937 | ENSP00000340944 |
| ENSP00000261937 | ENSP00000341189 |
| ENSP00000261937 | ENSP00000343785 |
| ENSP00000261937 | ENSP00000352121 |
| ENSP00000261937 | ENSP00000354995 |
| ENSP00000261942 | ENSP00000262776 |
| ENSP00000261942 | ENSP00000262854 |
| ENSP00000261942 | ENSP00000263202 |
| ENSP00000261942 | ENSP00000263966 |
| ENSP00000261942 | ENSP00000273067 |
| ENSP00000261942 | ENSP00000274140 |
| ENSP00000261942 | ENSP00000283943 |
| ENSP00000261942 | ENSP00000284811 |
| ENSP00000261942 | ENSP00000285928 |
| ENSP00000261942 | ENSP00000287936 |
| ENSP00000261942 | ENSP00000288828 |
| ENSP00000261942 | ENSP00000290649 |
| ENSP00000261942 | ENSP00000292363 |
| ENSP00000261942 | ENSP00000297313 |
| ENSP00000261942 | ENSP00000299626 |
| ENSP00000261942 | ENSP00000301281 |
| ENSP00000261942 | ENSP00000301764 |
| ENSP00000261942 | ENSP00000302176 |
| ENSP00000261942 | ENSP00000304604 |
| ENSP00000261942 | ENSP00000309031 |
| ENSP00000261942 | ENSP00000309141 |
| ENSP00000261942 | ENSP00000311496 |
| ENSP00000261942 | ENSP00000317087 |
| ENSP00000261942 | ENSP00000321617 |
| ENSP00000261942 | ENSP00000326813 |
| ENSP00000261942 | ENSP00000331487 |
| ENSP00000261942 | ENSP00000337053 |
| ENSP00000261942 | ENSP00000343001 |
| ENSP00000261942 | ENSP00000344741 |
| ENSP00000261942 | ENSP00000348069 |
| ENSP00000261942 | ENSP00000354775 |
| ENSP00000261942 | ENSP00000356591 |
| ENSP00000261942 | ENSP00000359380 |
| ENSP00000261942 | ENSP00000361990 |
| ENSP00000261942 | ENSP00000364403 |
| ENSP00000261942 | ENSP00000366395 |
| ENSP00000261942 | ENSP00000366748 |
| ENSP00000261942 | ENSP00000369335 |
| ENSP00000261942 | ENSP00000375881 |
| ENSP00000261942 | ENSP00000379457 |

|                 |                 |
|-----------------|-----------------|
| ENSP00000261942 | ENSP00000380460 |
| ENSP00000261942 | ENSP00000381045 |
| ENSP00000261942 | ENSP00000382269 |
| ENSP00000261942 | ENSP00000383911 |
| ENSP00000261942 | ENSP00000401445 |
| ENSP00000261951 | ENSP00000262300 |
| ENSP00000261951 | ENSP00000262803 |
| ENSP00000261951 | ENSP00000263629 |
| ENSP00000261951 | ENSP00000263736 |
| ENSP00000261951 | ENSP00000264157 |
| ENSP00000261951 | ENSP00000273064 |
| ENSP00000261951 | ENSP00000276072 |
| ENSP00000261951 | ENSP00000278616 |
| ENSP00000261951 | ENSP00000283882 |
| ENSP00000261951 | ENSP00000285896 |
| ENSP00000261951 | ENSP00000296328 |
| ENSP00000261951 | ENSP00000296509 |
| ENSP00000261951 | ENSP00000300648 |
| ENSP00000261951 | ENSP00000300738 |
| ENSP00000261951 | ENSP00000302160 |
| ENSP00000261951 | ENSP00000302955 |
| ENSP00000261951 | ENSP00000310596 |
| ENSP00000261951 | ENSP00000312735 |
| ENSP00000261951 | ENSP00000312981 |
| ENSP00000261951 | ENSP00000313171 |
| ENSP00000261951 | ENSP00000314949 |
| ENSP00000261951 | ENSP00000315700 |
| ENSP00000261951 | ENSP00000319104 |
| ENSP00000261951 | ENSP00000320949 |
| ENSP00000261951 | ENSP00000321711 |
| ENSP00000261951 | ENSP00000330060 |
| ENSP00000261951 | ENSP00000331879 |
| ENSP00000261951 | ENSP00000338967 |
| ENSP00000261951 | ENSP00000340823 |
| ENSP00000261951 | ENSP00000341743 |
| ENSP00000261951 | ENSP00000343741 |
| ENSP00000261951 | ENSP00000350491 |
| ENSP00000261951 | ENSP00000350990 |
| ENSP00000261951 | ENSP00000351284 |
| ENSP00000261951 | ENSP00000352738 |
| ENSP00000261951 | ENSP00000354522 |
| ENSP00000261951 | ENSP00000354673 |
| ENSP00000261951 | ENSP00000355051 |
| ENSP00000261951 | ENSP00000356405 |
| ENSP00000261951 | ENSP00000359552 |
| ENSP00000261951 | ENSP00000360515 |

|                 |                 |
|-----------------|-----------------|
| ENSP00000261951 | ENSP00000361949 |
| ENSP00000261951 | ENSP00000366135 |
| ENSP00000261951 | ENSP00000366557 |
| ENSP00000261951 | ENSP00000368438 |
| ENSP00000261951 | ENSP00000369965 |
| ENSP00000261951 | ENSP00000370151 |
| ENSP00000261951 | ENSP00000372023 |
| ENSP00000261951 | ENSP00000387170 |
| ENSP00000261951 | ENSP00000391723 |
| ENSP00000261965 | ENSP00000262300 |
| ENSP00000261965 | ENSP00000263181 |
| ENSP00000261965 | ENSP00000267068 |
| ENSP00000261965 | ENSP00000270861 |
| ENSP00000261965 | ENSP00000274289 |
| ENSP00000261965 | ENSP00000288976 |
| ENSP00000261965 | ENSP00000296509 |
| ENSP00000261965 | ENSP00000300584 |
| ENSP00000261965 | ENSP00000305941 |
| ENSP00000261965 | ENSP00000331831 |
| ENSP00000261965 | ENSP00000335357 |
| ENSP00000261965 | ENSP00000346566 |
| ENSP00000261965 | ENSP00000348573 |
| ENSP00000261965 | ENSP00000352572 |
| ENSP00000261965 | ENSP00000354916 |
| ENSP00000261965 | ENSP00000356405 |
| ENSP00000261965 | ENSP00000356448 |
| ENSP00000261965 | ENSP00000359206 |
| ENSP00000261965 | ENSP00000360473 |
| ENSP00000261965 | ENSP00000360532 |
| ENSP00000261965 | ENSP00000363734 |
| ENSP00000261965 | ENSP00000367049 |
| ENSP00000261965 | ENSP00000370517 |
| ENSP00000261965 | ENSP00000372694 |
| ENSP00000261965 | ENSP00000377470 |
| ENSP00000261965 | ENSP00000380921 |
| ENSP00000261965 | ENSP00000382328 |
| ENSP00000261965 | ENSP00000387262 |
| ENSP00000261965 | ENSP00000402084 |
| ENSP00000261965 | ENSP00000412319 |
| ENSP00000261965 | ENSP00000415678 |
| ENSP00000261973 | ENSP00000262027 |
| ENSP00000261973 | ENSP00000263377 |
| ENSP00000261973 | ENSP00000265073 |
| ENSP00000261973 | ENSP00000266079 |
| ENSP00000261973 | ENSP00000266735 |
| ENSP00000261973 | ENSP00000296702 |



|                 |                 |
|-----------------|-----------------|
| ENSP00000261973 | ENSP00000300413 |
| ENSP00000261973 | ENSP00000301740 |
| ENSP00000261973 | ENSP00000303191 |
| ENSP00000261973 | ENSP00000304350 |
| ENSP00000261973 | ENSP00000305790 |
| ENSP00000261973 | ENSP00000306983 |
| ENSP00000261973 | ENSP00000307863 |
| ENSP00000261973 | ENSP00000309457 |
| ENSP00000261973 | ENSP00000310448 |
| ENSP00000261973 | ENSP00000315859 |
| ENSP00000261973 | ENSP00000316879 |
| ENSP00000261973 | ENSP00000319341 |
| ENSP00000261973 | ENSP00000322016 |
| ENSP00000261973 | ENSP00000323302 |
| ENSP00000261973 | ENSP00000324122 |
| ENSP00000261973 | ENSP00000326261 |
| ENSP00000261973 | ENSP00000326806 |
| ENSP00000261973 | ENSP00000329466 |
| ENSP00000261973 | ENSP00000332103 |
| ENSP00000261973 | ENSP00000337405 |
| ENSP00000261973 | ENSP00000342374 |
| ENSP00000261973 | ENSP00000344241 |
| ENSP00000261973 | ENSP00000346986 |
| ENSP00000261973 | ENSP00000348010 |
| ENSP00000261973 | ENSP00000349658 |
| ENSP00000261973 | ENSP00000359518 |
| ENSP00000261973 | ENSP00000360147 |
| ENSP00000261973 | ENSP00000360464 |
| ENSP00000261973 | ENSP00000361577 |
| ENSP00000261973 | ENSP00000362166 |
| ENSP00000261973 | ENSP00000362900 |
| ENSP00000261973 | ENSP00000362936 |
| ENSP00000261973 | ENSP00000363313 |
| ENSP00000261973 | ENSP00000364289 |
| ENSP00000261973 | ENSP00000366607 |
| ENSP00000261973 | ENSP00000368801 |
| ENSP00000261973 | ENSP00000369218 |
| ENSP00000261973 | ENSP00000370377 |
| ENSP00000261973 | ENSP00000372023 |
| ENSP00000261973 | ENSP00000376309 |
| ENSP00000261973 | ENSP00000379607 |
| ENSP00000261973 | ENSP00000383059 |
| ENSP00000261973 | ENSP00000389649 |
| ENSP00000261973 | ENSP00000391432 |
| ENSP00000261973 | ENSP00000392330 |
| ENSP00000261973 | ENSP00000394085 |

|                 |                 |
|-----------------|-----------------|
| ENSP00000261973 | ENSP00000397598 |
| ENSP00000261973 | ENSP00000412566 |
| ENSP00000261973 | ENSP00000416959 |
| ENSP00000261973 | ENSP00000420195 |
| ENSP00000262027 | ENSP00000264161 |
| ENSP00000262027 | ENSP00000266126 |
| ENSP00000262027 | ENSP00000274680 |
| ENSP00000262027 | ENSP00000276326 |
| ENSP00000262027 | ENSP00000281828 |
| ENSP00000262027 | ENSP00000284719 |
| ENSP00000262027 | ENSP00000294053 |
| ENSP00000262027 | ENSP00000294168 |
| ENSP00000262027 | ENSP00000300648 |
| ENSP00000262027 | ENSP00000303279 |
| ENSP00000262027 | ENSP00000306920 |
| ENSP00000262027 | ENSP00000307567 |
| ENSP00000262027 | ENSP00000307900 |
| ENSP00000262027 | ENSP00000317904 |
| ENSP00000262027 | ENSP00000318921 |
| ENSP00000262027 | ENSP00000327821 |
| ENSP00000262027 | ENSP00000338862 |
| ENSP00000262027 | ENSP00000339933 |
| ENSP00000262027 | ENSP00000340698 |
| ENSP00000262027 | ENSP00000344537 |
| ENSP00000262027 | ENSP00000353741 |
| ENSP00000262027 | ENSP00000355890 |
| ENSP00000262027 | ENSP00000358812 |
| ENSP00000262027 | ENSP00000360327 |
| ENSP00000262027 | ENSP00000362576 |
| ENSP00000262027 | ENSP00000364794 |
| ENSP00000262027 | ENSP00000367029 |
| ENSP00000262027 | ENSP00000367408 |
| ENSP00000262027 | ENSP00000367498 |
| ENSP00000262027 | ENSP00000369038 |
| ENSP00000262027 | ENSP00000373918 |
| ENSP00000262027 | ENSP00000375863 |
| ENSP00000262027 | ENSP00000379607 |
| ENSP00000262027 | ENSP00000417764 |
| ENSP00000262030 | ENSP00000262375 |
| ENSP00000262030 | ENSP00000262455 |
| ENSP00000262030 | ENSP00000263208 |
| ENSP00000262030 | ENSP00000263642 |
| ENSP00000262030 | ENSP00000263791 |
| ENSP00000262030 | ENSP00000263805 |
| ENSP00000262030 | ENSP00000264065 |
| ENSP00000262030 | ENSP00000268379 |

|                 |                 |
|-----------------|-----------------|
| ENSP00000262030 | ENSP00000269143 |
| ENSP00000262030 | ENSP00000270538 |
| ENSP00000262030 | ENSP00000272227 |
| ENSP00000262030 | ENSP00000273398 |
| ENSP00000262030 | ENSP00000276326 |
| ENSP00000262030 | ENSP00000282007 |
| ENSP00000262030 | ENSP00000282050 |
| ENSP00000262030 | ENSP00000282549 |
| ENSP00000262030 | ENSP00000284320 |
| ENSP00000262030 | ENSP00000284719 |
| ENSP00000262030 | ENSP00000284727 |
| ENSP00000262030 | ENSP00000290299 |
| ENSP00000262030 | ENSP00000292180 |
| ENSP00000262030 | ENSP00000293362 |
| ENSP00000262030 | ENSP00000295030 |
| ENSP00000262030 | ENSP00000296930 |
| ENSP00000262030 | ENSP00000298852 |
| ENSP00000262030 | ENSP00000299543 |
| ENSP00000262030 | ENSP00000299767 |
| ENSP00000262030 | ENSP00000300688 |
| ENSP00000262030 | ENSP00000301585 |
| ENSP00000262030 | ENSP00000301587 |
| ENSP00000262030 | ENSP00000303511 |
| ENSP00000262030 | ENSP00000304668 |
| ENSP00000262030 | ENSP00000305465 |
| ENSP00000262030 | ENSP00000305958 |
| ENSP00000262030 | ENSP00000307567 |
| ENSP00000262030 | ENSP00000309565 |
| ENSP00000262030 | ENSP00000312735 |
| ENSP00000262030 | ENSP00000313953 |
| ENSP00000262030 | ENSP00000314380 |
| ENSP00000262030 | ENSP00000323313 |
| ENSP00000262030 | ENSP00000327070 |
| ENSP00000262030 | ENSP00000329002 |
| ENSP00000262030 | ENSP00000332887 |
| ENSP00000262030 | ENSP00000335203 |
| ENSP00000262030 | ENSP00000341243 |
| ENSP00000262030 | ENSP00000344431 |
| ENSP00000262030 | ENSP00000346022 |
| ENSP00000262030 | ENSP00000346067 |
| ENSP00000262030 | ENSP00000349142 |
| ENSP00000262030 | ENSP00000351492 |
| ENSP00000262030 | ENSP00000354632 |
| ENSP00000262030 | ENSP00000354876 |
| ENSP00000262030 | ENSP00000354982 |
| ENSP00000262030 | ENSP00000355890 |

|                 |                 |
|-----------------|-----------------|
| ENSP00000262030 | ENSP00000358737 |
| ENSP00000262030 | ENSP00000360286 |
| ENSP00000262030 | ENSP00000360782 |
| ENSP00000262030 | ENSP00000361005 |
| ENSP00000262030 | ENSP00000361207 |
| ENSP00000262030 | ENSP00000361686 |
| ENSP00000262030 | ENSP00000362688 |
| ENSP00000262030 | ENSP00000364486 |
| ENSP00000262030 | ENSP00000367934 |
| ENSP00000262030 | ENSP00000368646 |
| ENSP00000262030 | ENSP00000370414 |
| ENSP00000262030 | ENSP00000370741 |
| ENSP00000262030 | ENSP00000373952 |
| ENSP00000262030 | ENSP00000379607 |
| ENSP00000262030 | ENSP00000387262 |
| ENSP00000262030 | ENSP00000389649 |
| ENSP00000262030 | ENSP00000392270 |
| ENSP00000262030 | ENSP00000403817 |
| ENSP00000262030 | ENSP00000417190 |
| ENSP00000262032 | ENSP00000353622 |
| ENSP00000262032 | ENSP00000357881 |
| ENSP00000262039 | ENSP00000262850 |
| ENSP00000262039 | ENSP00000263974 |
| ENSP00000262039 | ENSP00000264380 |
| ENSP00000262039 | ENSP00000264864 |
| ENSP00000262039 | ENSP00000264926 |
| ENSP00000262039 | ENSP00000273398 |
| ENSP00000262039 | ENSP00000277746 |
| ENSP00000262039 | ENSP00000278412 |
| ENSP00000262039 | ENSP00000279230 |
| ENSP00000262039 | ENSP00000282412 |
| ENSP00000262039 | ENSP00000284957 |
| ENSP00000262039 | ENSP00000290330 |
| ENSP00000262039 | ENSP00000294168 |
| ENSP00000262039 | ENSP00000296343 |
| ENSP00000262039 | ENSP00000298552 |
| ENSP00000262039 | ENSP00000306682 |
| ENSP00000262039 | ENSP00000307684 |
| ENSP00000262039 | ENSP00000309457 |
| ENSP00000262039 | ENSP00000312411 |
| ENSP00000262039 | ENSP00000313420 |
| ENSP00000262039 | ENSP00000314499 |
| ENSP00000262039 | ENSP00000320646 |
| ENSP00000262039 | ENSP00000325863 |
| ENSP00000262039 | ENSP00000342681 |
| ENSP00000262039 | ENSP00000344537 |

|                 |                 |
|-----------------|-----------------|
| ENSP00000262039 | ENSP00000344668 |
| ENSP00000262039 | ENSP00000346566 |
| ENSP00000262039 | ENSP00000348455 |
| ENSP00000262039 | ENSP00000348784 |
| ENSP00000262039 | ENSP00000349205 |
| ENSP00000262039 | ENSP00000349785 |
| ENSP00000262039 | ENSP00000354519 |
| ENSP00000262039 | ENSP00000354558 |
| ENSP00000262039 | ENSP00000355231 |
| ENSP00000262039 | ENSP00000358423 |
| ENSP00000262039 | ENSP00000364893 |
| ENSP00000262039 | ENSP00000366565 |
| ENSP00000262039 | ENSP00000367265 |
| ENSP00000262039 | ENSP00000369335 |
| ENSP00000262039 | ENSP00000369810 |
| ENSP00000262039 | ENSP00000373702 |
| ENSP00000262039 | ENSP00000402515 |
| ENSP00000262041 | ENSP00000344609 |
| ENSP00000262041 | ENSP00000345445 |
| ENSP00000262041 | ENSP00000356213 |
| ENSP00000262041 | ENSP00000364524 |
| ENSP00000262041 | ENSP00000381499 |
| ENSP00000262043 | ENSP00000269703 |
| ENSP00000262043 | ENSP00000329466 |
| ENSP00000262043 | ENSP00000356448 |
| ENSP00000262052 | ENSP00000268379 |
| ENSP00000262052 | ENSP00000280154 |
| ENSP00000262052 | ENSP00000300658 |
| ENSP00000262052 | ENSP00000308750 |
| ENSP00000262052 | ENSP00000311200 |
| ENSP00000262052 | ENSP00000317468 |
| ENSP00000262052 | ENSP00000338387 |
| ENSP00000262052 | ENSP00000339845 |
| ENSP00000262052 | ENSP00000345530 |
| ENSP00000262052 | ENSP00000349877 |
| ENSP00000262052 | ENSP00000355865 |
| ENSP00000262052 | ENSP00000360782 |
| ENSP00000262052 | ENSP00000371169 |
| ENSP00000262052 | ENSP00000374455 |
| ENSP00000262055 | ENSP00000358242 |
| ENSP00000262055 | ENSP00000368959 |
| ENSP00000262056 | ENSP00000264718 |
| ENSP00000262056 | ENSP00000266735 |
| ENSP00000262056 | ENSP00000267415 |
| ENSP00000262056 | ENSP00000268482 |
| ENSP00000262056 | ENSP00000273064 |

|                 |                 |
|-----------------|-----------------|
| ENSP00000262056 | ENSP00000276603 |
| ENSP00000262056 | ENSP00000303191 |
| ENSP00000262056 | ENSP00000304370 |
| ENSP00000262056 | ENSP00000305790 |
| ENSP00000262056 | ENSP00000310040 |
| ENSP00000262056 | ENSP00000317992 |
| ENSP00000262056 | ENSP00000320658 |
| ENSP00000262056 | ENSP00000327821 |
| ENSP00000262056 | ENSP00000328690 |
| ENSP00000262056 | ENSP00000328854 |
| ENSP00000262056 | ENSP00000335321 |
| ENSP00000262056 | ENSP00000336702 |
| ENSP00000262056 | ENSP00000337701 |
| ENSP00000262056 | ENSP00000338862 |
| ENSP00000262056 | ENSP00000343535 |
| ENSP00000262056 | ENSP00000347329 |
| ENSP00000262056 | ENSP00000348010 |
| ENSP00000262056 | ENSP00000350249 |
| ENSP00000262056 | ENSP00000354125 |
| ENSP00000262056 | ENSP00000354673 |
| ENSP00000262056 | ENSP00000358140 |
| ENSP00000262056 | ENSP00000358423 |
| ENSP00000262056 | ENSP00000362306 |
| ENSP00000262056 | ENSP00000362576 |
| ENSP00000262056 | ENSP00000362688 |
| ENSP00000262056 | ENSP00000366557 |
| ENSP00000262056 | ENSP00000368797 |
| ENSP00000262056 | ENSP00000370372 |
| ENSP00000262056 | ENSP00000371607 |
| ENSP00000262056 | ENSP00000373700 |
| ENSP00000262056 | ENSP00000376973 |
| ENSP00000262056 | ENSP00000377496 |
| ENSP00000262056 | ENSP00000391723 |
| ENSP00000262056 | ENSP00000400591 |
| ENSP00000262059 | ENSP00000262367 |
| ENSP00000262059 | ENSP00000344456 |
| ENSP00000262059 | ENSP00000355050 |
| ENSP00000262059 | ENSP00000400806 |
| ENSP00000262077 | ENSP00000262982 |
| ENSP00000262077 | ENSP00000264883 |
| ENSP00000262077 | ENSP00000265351 |
| ENSP00000262077 | ENSP00000265388 |
| ENSP00000262077 | ENSP00000270176 |
| ENSP00000262077 | ENSP00000272645 |
| ENSP00000262077 | ENSP00000283195 |
| ENSP00000262077 | ENSP00000285968 |

|                 |                 |
|-----------------|-----------------|
| ENSP00000262077 | ENSP00000286428 |
| ENSP00000262077 | ENSP00000288937 |
| ENSP00000262077 | ENSP00000290158 |
| ENSP00000262077 | ENSP00000290231 |
| ENSP00000262077 | ENSP00000291688 |
| ENSP00000262077 | ENSP00000294008 |
| ENSP00000262077 | ENSP00000296257 |
| ENSP00000262077 | ENSP00000296509 |
| ENSP00000262077 | ENSP00000302886 |
| ENSP00000262077 | ENSP00000305503 |
| ENSP00000262077 | ENSP00000308275 |
| ENSP00000262077 | ENSP00000308622 |
| ENSP00000262077 | ENSP00000310668 |
| ENSP00000262077 | ENSP00000314949 |
| ENSP00000262077 | ENSP00000315017 |
| ENSP00000262077 | ENSP00000316032 |
| ENSP00000262077 | ENSP00000326806 |
| ENSP00000262077 | ENSP00000327821 |
| ENSP00000262077 | ENSP00000329466 |
| ENSP00000262077 | ENSP00000331817 |
| ENSP00000262077 | ENSP00000333813 |
| ENSP00000262077 | ENSP00000336712 |
| ENSP00000262077 | ENSP00000343741 |
| ENSP00000262077 | ENSP00000344456 |
| ENSP00000262077 | ENSP00000345895 |
| ENSP00000262077 | ENSP00000348577 |
| ENSP00000262077 | ENSP00000350283 |
| ENSP00000262077 | ENSP00000352400 |
| ENSP00000262077 | ENSP00000354673 |
| ENSP00000262077 | ENSP00000354742 |
| ENSP00000262077 | ENSP00000356448 |
| ENSP00000262077 | ENSP00000356744 |
| ENSP00000262077 | ENSP00000356989 |
| ENSP00000262077 | ENSP00000357283 |
| ENSP00000262077 | ENSP00000360031 |
| ENSP00000262077 | ENSP00000360286 |
| ENSP00000262077 | ENSP00000361418 |
| ENSP00000262077 | ENSP00000363763 |
| ENSP00000262077 | ENSP00000364289 |
| ENSP00000262077 | ENSP00000364293 |
| ENSP00000262077 | ENSP00000365837 |
| ENSP00000262077 | ENSP00000368439 |
| ENSP00000262077 | ENSP00000368856 |
| ENSP00000262077 | ENSP00000369042 |
| ENSP00000262077 | ENSP00000371155 |
| ENSP00000262077 | ENSP00000372023 |

|                 |                 |
|-----------------|-----------------|
| ENSP00000262077 | ENSP00000372199 |
| ENSP00000262077 | ENSP00000382779 |
| ENSP00000262077 | ENSP00000390158 |
| ENSP00000262077 | ENSP00000402338 |
| ENSP00000262096 | ENSP00000344456 |
| ENSP00000262096 | ENSP00000362021 |
| ENSP00000262096 | ENSP00000377372 |
| ENSP00000262102 | ENSP00000264169 |
| ENSP00000262127 | ENSP00000333537 |
| ENSP00000262127 | ENSP00000342510 |
| ENSP00000262127 | ENSP00000349576 |
| ENSP00000262127 | ENSP00000354848 |
| ENSP00000262127 | ENSP00000368464 |
| ENSP00000262127 | ENSP00000374529 |
| ENSP00000262127 | ENSP00000382390 |
| ENSP00000262127 | ENSP00000382595 |
| ENSP00000262133 | ENSP00000262643 |
| ENSP00000262133 | ENSP00000263121 |
| ENSP00000262133 | ENSP00000263360 |
| ENSP00000262133 | ENSP00000267163 |
| ENSP00000262133 | ENSP00000274255 |
| ENSP00000262133 | ENSP00000276072 |
| ENSP00000262133 | ENSP00000302640 |
| ENSP00000262133 | ENSP00000305899 |
| ENSP00000262133 | ENSP00000310623 |
| ENSP00000262133 | ENSP00000317872 |
| ENSP00000262133 | ENSP00000320340 |
| ENSP00000262133 | ENSP00000323050 |
| ENSP00000262133 | ENSP00000329029 |
| ENSP00000262133 | ENSP00000329102 |
| ENSP00000262133 | ENSP00000332353 |
| ENSP00000262133 | ENSP00000335261 |
| ENSP00000262133 | ENSP00000336866 |
| ENSP00000262133 | ENSP00000340305 |
| ENSP00000262133 | ENSP00000341947 |
| ENSP00000262133 | ENSP00000350283 |
| ENSP00000262133 | ENSP00000352514 |
| ENSP00000262133 | ENSP00000355922 |
| ENSP00000262133 | ENSP00000362592 |
| ENSP00000262133 | ENSP00000365877 |
| ENSP00000262133 | ENSP00000368686 |
| ENSP00000262133 | ENSP00000386165 |
| ENSP00000262134 | ENSP00000302177 |
| ENSP00000262134 | ENSP00000311505 |
| ENSP00000262144 | ENSP00000263208 |
| ENSP00000262144 | ENSP00000264169 |



|                 |                 |
|-----------------|-----------------|
| ENSP00000262144 | ENSP00000290130 |
| ENSP00000262144 | ENSP00000293883 |
| ENSP00000262144 | ENSP00000297431 |
| ENSP00000262144 | ENSP00000339881 |
| ENSP00000262144 | ENSP00000343885 |
| ENSP00000262144 | ENSP00000344741 |
| ENSP00000262144 | ENSP00000360286 |
| ENSP00000262144 | ENSP00000360621 |
| ENSP00000262144 | ENSP00000368438 |
| ENSP00000262144 | ENSP00000369335 |
| ENSP00000262144 | ENSP00000371546 |
| ENSP00000262144 | ENSP00000382779 |
| ENSP00000262173 | ENSP00000263228 |
| ENSP00000262173 | ENSP00000264157 |
| ENSP00000262173 | ENSP00000286621 |
| ENSP00000262173 | ENSP00000296328 |
| ENSP00000262173 | ENSP00000307181 |
| ENSP00000262173 | ENSP00000309433 |
| ENSP00000262173 | ENSP00000312735 |
| ENSP00000262173 | ENSP00000314949 |
| ENSP00000262173 | ENSP00000315931 |
| ENSP00000262173 | ENSP00000319104 |
| ENSP00000262173 | ENSP00000348762 |
| ENSP00000262173 | ENSP00000358497 |
| ENSP00000262173 | ENSP00000361287 |
| ENSP00000262173 | ENSP00000364289 |
| ENSP00000262173 | ENSP00000373715 |
| ENSP00000262173 | ENSP00000374529 |
| ENSP00000262177 | ENSP00000264731 |
| ENSP00000262177 | ENSP00000294008 |
| ENSP00000262177 | ENSP00000294053 |
| ENSP00000262177 | ENSP00000302239 |
| ENSP00000262177 | ENSP00000302478 |
| ENSP00000262177 | ENSP00000305958 |
| ENSP00000262177 | ENSP00000329558 |
| ENSP00000262177 | ENSP00000334061 |
| ENSP00000262177 | ENSP00000346791 |
| ENSP00000262177 | ENSP00000360286 |
| ENSP00000262177 | ENSP00000361310 |
| ENSP00000262177 | ENSP00000362306 |
| ENSP00000262177 | ENSP00000365435 |
| ENSP00000262177 | ENSP00000367208 |
| ENSP00000262177 | ENSP00000381003 |
| ENSP00000262177 | ENSP00000397435 |
| ENSP00000262193 | ENSP00000262966 |
| ENSP00000262193 | ENSP00000264639 |

|                 |                 |
|-----------------|-----------------|
| ENSP00000262193 | ENSP00000266126 |
| ENSP00000262193 | ENSP00000268668 |
| ENSP00000262193 | ENSP00000277541 |
| ENSP00000262193 | ENSP00000282050 |
| ENSP00000262193 | ENSP00000290541 |
| ENSP00000262193 | ENSP00000290949 |
| ENSP00000262193 | ENSP00000293362 |
| ENSP00000262193 | ENSP00000295901 |
| ENSP00000262193 | ENSP00000296786 |
| ENSP00000262193 | ENSP00000298852 |
| ENSP00000262193 | ENSP00000309474 |
| ENSP00000262193 | ENSP00000310129 |
| ENSP00000262193 | ENSP00000311344 |
| ENSP00000262193 | ENSP00000311505 |
| ENSP00000262193 | ENSP00000314837 |
| ENSP00000262193 | ENSP00000320543 |
| ENSP00000262193 | ENSP00000325919 |
| ENSP00000262193 | ENSP00000326366 |
| ENSP00000262193 | ENSP00000328940 |
| ENSP00000262193 | ENSP00000346453 |
| ENSP00000262193 | ENSP00000348442 |
| ENSP00000262193 | ENSP00000350512 |
| ENSP00000262193 | ENSP00000350708 |
| ENSP00000262193 | ENSP00000352425 |
| ENSP00000262193 | ENSP00000356130 |
| ENSP00000262193 | ENSP00000360268 |
| ENSP00000262193 | ENSP00000360519 |
| ENSP00000262193 | ENSP00000362334 |
| ENSP00000262193 | ENSP00000365775 |
| ENSP00000262193 | ENSP00000367910 |
| ENSP00000262193 | ENSP00000370222 |
| ENSP00000262193 | ENSP00000370741 |
| ENSP00000262193 | ENSP00000373715 |
| ENSP00000262193 | ENSP00000374455 |
| ENSP00000262193 | ENSP00000375986 |
| ENSP00000262193 | ENSP00000379217 |
| ENSP00000262193 | ENSP00000379607 |
| ENSP00000262193 | ENSP00000381577 |
| ENSP00000262193 | ENSP00000384211 |
| ENSP00000262193 | ENSP00000396937 |
| ENSP00000262193 | ENSP00000398597 |
| ENSP00000262193 | ENSP00000403852 |
| ENSP00000262193 | ENSP00000418734 |
| ENSP00000262198 | ENSP00000396620 |
| ENSP00000262213 | ENSP00000346022 |
| ENSP00000262213 | ENSP00000376445 |

|                 |                 |
|-----------------|-----------------|
| ENSP00000262213 | ENSP00000392330 |
| ENSP00000262215 | ENSP00000262544 |
| ENSP00000262215 | ENSP00000262982 |
| ENSP00000262215 | ENSP00000263121 |
| ENSP00000262215 | ENSP00000265175 |
| ENSP00000262215 | ENSP00000267064 |
| ENSP00000262215 | ENSP00000295066 |
| ENSP00000262215 | ENSP00000305503 |
| ENSP00000262215 | ENSP00000308496 |
| ENSP00000262215 | ENSP00000311134 |
| ENSP00000262215 | ENSP00000318195 |
| ENSP00000262215 | ENSP00000323967 |
| ENSP00000262215 | ENSP00000325002 |
| ENSP00000262215 | ENSP00000328690 |
| ENSP00000262215 | ENSP00000334100 |
| ENSP00000262215 | ENSP00000337463 |
| ENSP00000262215 | ENSP00000345530 |
| ENSP00000262215 | ENSP00000346453 |
| ENSP00000262215 | ENSP00000349131 |
| ENSP00000262215 | ENSP00000349213 |
| ENSP00000262215 | ENSP00000350409 |
| ENSP00000262215 | ENSP00000351682 |
| ENSP00000262215 | ENSP00000351957 |
| ENSP00000262215 | ENSP00000352738 |
| ENSP00000262215 | ENSP00000354347 |
| ENSP00000262215 | ENSP00000354851 |
| ENSP00000262215 | ENSP00000355890 |
| ENSP00000262215 | ENSP00000359000 |
| ENSP00000262215 | ENSP00000359067 |
| ENSP00000262215 | ENSP00000359837 |
| ENSP00000262215 | ENSP00000365943 |
| ENSP00000262215 | ENSP00000368565 |
| ENSP00000262215 | ENSP00000379228 |
| ENSP00000262215 | ENSP00000380702 |
| ENSP00000262215 | ENSP00000382723 |
| ENSP00000262215 | ENSP00000388872 |
| ENSP00000262215 | ENSP00000389516 |
| ENSP00000262215 | ENSP00000392028 |
| ENSP00000262215 | ENSP00000395863 |
| ENSP00000262215 | ENSP00000396620 |
| ENSP00000262215 | ENSP00000401287 |
| ENSP00000262215 | ENSP00000405864 |
| ENSP00000262215 | ENSP00000412805 |
| ENSP00000262238 | ENSP00000262367 |
| ENSP00000262238 | ENSP00000262904 |
| ENSP00000262238 | ENSP00000263360 |

|                 |                 |
|-----------------|-----------------|
| ENSP00000262238 | ENSP00000264010 |
| ENSP00000262238 | ENSP00000267163 |
| ENSP00000262238 | ENSP00000271883 |
| ENSP00000262238 | ENSP00000274255 |
| ENSP00000262238 | ENSP00000276603 |
| ENSP00000262238 | ENSP00000276893 |
| ENSP00000262238 | ENSP00000277541 |
| ENSP00000262238 | ENSP00000296504 |
| ENSP00000262238 | ENSP00000296930 |
| ENSP00000262238 | ENSP00000297261 |
| ENSP00000262238 | ENSP00000303315 |
| ENSP00000262238 | ENSP00000306245 |
| ENSP00000262238 | ENSP00000309555 |
| ENSP00000262238 | ENSP00000313420 |
| ENSP00000262238 | ENSP00000314311 |
| ENSP00000262238 | ENSP00000329357 |
| ENSP00000262238 | ENSP00000336842 |
| ENSP00000262238 | ENSP00000338127 |
| ENSP00000262238 | ENSP00000341551 |
| ENSP00000262238 | ENSP00000343785 |
| ENSP00000262238 | ENSP00000348069 |
| ENSP00000262238 | ENSP00000349640 |
| ENSP00000262238 | ENSP00000350283 |
| ENSP00000262238 | ENSP00000351490 |
| ENSP00000262238 | ENSP00000351947 |
| ENSP00000262238 | ENSP00000352257 |
| ENSP00000262238 | ENSP00000353622 |
| ENSP00000262238 | ENSP00000354995 |
| ENSP00000262238 | ENSP00000355153 |
| ENSP00000262238 | ENSP00000355205 |
| ENSP00000262238 | ENSP00000359531 |
| ENSP00000262238 | ENSP00000359958 |
| ENSP00000262238 | ENSP00000376204 |
| ENSP00000262238 | ENSP00000384198 |
| ENSP00000262238 | ENSP00000391457 |
| ENSP00000262238 | ENSP00000391735 |
| ENSP00000262238 | ENSP00000393275 |
| ENSP00000262238 | ENSP00000395535 |
| ENSP00000262238 | ENSP00000400476 |
| ENSP00000262238 | ENSP00000404121 |
| ENSP00000262238 | ENSP00000408792 |
| ENSP00000262238 | ENSP00000417132 |
| ENSP00000262238 | ENSP00000417281 |
| ENSP00000262238 | ENSP00000419494 |
| ENSP00000262265 | ENSP00000264718 |
| ENSP00000262265 | ENSP00000266712 |

|                 |                 |
|-----------------|-----------------|
| ENSP00000262265 | ENSP00000268057 |
| ENSP00000262265 | ENSP00000272521 |
| ENSP00000262265 | ENSP00000300181 |
| ENSP00000262265 | ENSP00000323275 |
| ENSP00000262265 | ENSP00000323424 |
| ENSP00000262265 | ENSP00000324122 |
| ENSP00000262265 | ENSP00000333018 |
| ENSP00000262265 | ENSP00000350011 |
| ENSP00000262265 | ENSP00000353971 |
| ENSP00000262265 | ENSP00000355621 |
| ENSP00000262265 | ENSP00000357220 |
| ENSP00000262265 | ENSP00000360497 |
| ENSP00000262265 | ENSP00000360876 |
| ENSP00000262265 | ENSP00000361010 |
| ENSP00000262265 | ENSP00000362386 |
| ENSP00000262265 | ENSP00000362546 |
| ENSP00000262265 | ENSP00000364298 |
| ENSP00000262265 | ENSP00000366135 |
| ENSP00000262265 | ENSP00000370258 |
| ENSP00000262265 | ENSP00000371169 |
| ENSP00000262265 | ENSP00000397530 |
| ENSP00000262265 | ENSP00000398812 |
| ENSP00000262265 | ENSP00000412439 |
| ENSP00000262291 | ENSP00000281537 |
| ENSP00000262291 | ENSP00000331201 |
| ENSP00000262291 | ENSP00000345656 |
| ENSP00000262294 | ENSP00000264108 |
| ENSP00000262294 | ENSP00000289013 |
| ENSP00000262294 | ENSP00000299601 |
| ENSP00000262294 | ENSP00000323511 |
| ENSP00000262294 | ENSP00000326767 |
| ENSP00000262294 | ENSP00000343818 |
| ENSP00000262294 | ENSP00000347836 |
| ENSP00000262294 | ENSP00000349640 |
| ENSP00000262294 | ENSP00000354270 |
| ENSP00000262294 | ENSP00000360116 |
| ENSP00000262294 | ENSP00000364126 |
| ENSP00000262294 | ENSP00000365435 |
| ENSP00000262294 | ENSP00000377793 |
| ENSP00000262294 | ENSP00000381031 |
| ENSP00000262294 | ENSP00000381795 |
| ENSP00000262294 | ENSP00000386895 |
| ENSP00000262294 | ENSP00000400806 |
| ENSP00000262300 | ENSP00000263181 |
| ENSP00000262300 | ENSP00000263208 |
| ENSP00000262300 | ENSP00000263228 |

|                 |                 |
|-----------------|-----------------|
| ENSP00000262300 | ENSP00000263710 |
| ENSP00000262300 | ENSP00000264108 |
| ENSP00000262300 | ENSP00000264169 |
| ENSP00000262300 | ENSP00000264731 |
| ENSP00000262300 | ENSP00000265148 |
| ENSP00000262300 | ENSP00000265562 |
| ENSP00000262300 | ENSP00000268533 |
| ENSP00000262300 | ENSP00000270225 |
| ENSP00000262300 | ENSP00000281187 |
| ENSP00000262300 | ENSP00000281708 |
| ENSP00000262300 | ENSP00000282388 |
| ENSP00000262300 | ENSP00000283228 |
| ENSP00000262300 | ENSP00000285873 |
| ENSP00000262300 | ENSP00000285896 |
| ENSP00000262300 | ENSP00000287598 |
| ENSP00000262300 | ENSP00000295951 |
| ENSP00000262300 | ENSP00000296509 |
| ENSP00000262300 | ENSP00000296733 |
| ENSP00000262300 | ENSP00000297338 |
| ENSP00000262300 | ENSP00000298048 |
| ENSP00000262300 | ENSP00000299767 |
| ENSP00000262300 | ENSP00000301764 |
| ENSP00000262300 | ENSP00000302530 |
| ENSP00000262300 | ENSP00000304226 |
| ENSP00000262300 | ENSP00000305790 |
| ENSP00000262300 | ENSP00000306124 |
| ENSP00000262300 | ENSP00000310649 |
| ENSP00000262300 | ENSP00000311005 |
| ENSP00000262300 | ENSP00000311083 |
| ENSP00000262300 | ENSP00000312150 |
| ENSP00000262300 | ENSP00000315659 |
| ENSP00000262300 | ENSP00000316845 |
| ENSP00000262300 | ENSP00000318884 |
| ENSP00000262300 | ENSP00000319169 |
| ENSP00000262300 | ENSP00000320488 |
| ENSP00000262300 | ENSP00000322170 |
| ENSP00000262300 | ENSP00000322957 |
| ENSP00000262300 | ENSP00000323377 |
| ENSP00000262300 | ENSP00000327315 |
| ENSP00000262300 | ENSP00000329623 |
| ENSP00000262300 | ENSP00000332171 |
| ENSP00000262300 | ENSP00000333950 |
| ENSP00000262300 | ENSP00000340879 |
| ENSP00000262300 | ENSP00000341848 |
| ENSP00000262300 | ENSP00000343741 |
| ENSP00000262300 | ENSP00000345656 |

|                 |                 |
|-----------------|-----------------|
| ENSP00000262300 | ENSP00000348163 |
| ENSP00000262300 | ENSP00000348215 |
| ENSP00000262300 | ENSP00000348573 |
| ENSP00000262300 | ENSP00000351113 |
| ENSP00000262300 | ENSP00000351885 |
| ENSP00000262300 | ENSP00000352572 |
| ENSP00000262300 | ENSP00000354486 |
| ENSP00000262300 | ENSP00000354558 |
| ENSP00000262300 | ENSP00000355884 |
| ENSP00000262300 | ENSP00000355922 |
| ENSP00000262300 | ENSP00000359552 |
| ENSP00000262300 | ENSP00000360310 |
| ENSP00000262300 | ENSP00000360621 |
| ENSP00000262300 | ENSP00000361009 |
| ENSP00000262300 | ENSP00000362171 |
| ENSP00000262300 | ENSP00000362578 |
| ENSP00000262300 | ENSP00000365963 |
| ENSP00000262300 | ENSP00000368140 |
| ENSP00000262300 | ENSP00000371475 |
| ENSP00000262300 | ENSP00000372023 |
| ENSP00000262300 | ENSP00000373107 |
| ENSP00000262300 | ENSP00000375986 |
| ENSP00000262300 | ENSP00000376410 |
| ENSP00000262300 | ENSP00000377047 |
| ENSP00000262300 | ENSP00000378529 |
| ENSP00000262300 | ENSP00000380450 |
| ENSP00000262300 | ENSP00000382177 |
| ENSP00000262300 | ENSP00000386621 |
| ENSP00000262300 | ENSP00000391723 |
| ENSP00000262300 | ENSP00000394056 |
| ENSP00000262300 | ENSP00000397351 |
| ENSP00000262300 | ENSP00000403557 |
| ENSP00000262300 | ENSP00000407981 |
| ENSP00000262300 | ENSP00000411038 |
| ENSP00000262300 | ENSP00000412297 |
| ENSP00000262300 | ENSP00000414808 |
| ENSP00000262300 | ENSP00000417963 |
| ENSP00000262304 | ENSP00000313169 |
| ENSP00000262304 | ENSP00000341189 |
| ENSP00000262304 | ENSP00000344456 |
| ENSP00000262304 | ENSP00000346839 |
| ENSP00000262304 | ENSP00000368391 |
| ENSP00000262305 | ENSP00000309871 |
| ENSP00000262305 | ENSP00000416511 |
| ENSP00000262306 | ENSP00000262394 |
| ENSP00000262306 | ENSP00000264607 |

|                 |                 |
|-----------------|-----------------|
| ENSP00000262306 | ENSP00000283921 |
| ENSP00000262306 | ENSP00000284811 |
| ENSP00000262306 | ENSP00000290663 |
| ENSP00000262306 | ENSP00000291900 |
| ENSP00000262306 | ENSP00000296328 |
| ENSP00000262306 | ENSP00000298288 |
| ENSP00000262306 | ENSP00000307854 |
| ENSP00000262306 | ENSP00000334188 |
| ENSP00000262306 | ENSP00000343298 |
| ENSP00000262306 | ENSP00000351407 |
| ENSP00000262306 | ENSP00000370968 |
| ENSP00000262306 | ENSP00000379607 |
| ENSP00000262306 | ENSP00000395574 |
| ENSP00000262306 | ENSP00000397435 |
| ENSP00000262306 | ENSP00000409346 |
| ENSP00000262315 | ENSP00000262460 |
| ENSP00000262315 | ENSP00000263181 |
| ENSP00000262315 | ENSP00000263201 |
| ENSP00000262315 | ENSP00000263202 |
| ENSP00000262315 | ENSP00000263208 |
| ENSP00000262315 | ENSP00000263274 |
| ENSP00000262315 | ENSP00000263710 |
| ENSP00000262315 | ENSP00000264515 |
| ENSP00000262315 | ENSP00000264926 |
| ENSP00000262315 | ENSP00000265007 |
| ENSP00000262315 | ENSP00000265056 |
| ENSP00000262315 | ENSP00000265140 |
| ENSP00000262315 | ENSP00000265148 |
| ENSP00000262315 | ENSP00000265354 |
| ENSP00000262315 | ENSP00000265465 |
| ENSP00000262315 | ENSP00000265728 |
| ENSP00000262315 | ENSP00000268043 |
| ENSP00000262315 | ENSP00000269214 |
| ENSP00000262315 | ENSP00000278412 |
| ENSP00000262315 | ENSP00000278616 |
| ENSP00000262315 | ENSP00000282516 |
| ENSP00000262315 | ENSP00000282572 |
| ENSP00000262315 | ENSP00000286428 |
| ENSP00000262315 | ENSP00000287598 |
| ENSP00000262315 | ENSP00000291688 |
| ENSP00000262315 | ENSP00000295066 |
| ENSP00000262315 | ENSP00000296273 |
| ENSP00000262315 | ENSP00000296509 |
| ENSP00000262315 | ENSP00000297316 |
| ENSP00000262315 | ENSP00000297338 |
| ENSP00000262315 | ENSP00000297431 |



|                 |                 |
|-----------------|-----------------|
| ENSP00000262315 | ENSP00000298139 |
| ENSP00000262315 | ENSP00000300249 |
| ENSP00000262315 | ENSP00000300738 |
| ENSP00000262315 | ENSP00000302530 |
| ENSP00000262315 | ENSP00000304593 |
| ENSP00000262315 | ENSP00000306999 |
| ENSP00000262315 | ENSP00000307853 |
| ENSP00000262315 | ENSP00000309572 |
| ENSP00000262315 | ENSP00000310649 |
| ENSP00000262315 | ENSP00000311873 |
| ENSP00000262315 | ENSP00000312870 |
| ENSP00000262315 | ENSP00000315700 |
| ENSP00000262315 | ENSP00000317636 |
| ENSP00000262315 | ENSP00000318977 |
| ENSP00000262315 | ENSP00000321636 |
| ENSP00000262315 | ENSP00000322180 |
| ENSP00000262315 | ENSP00000322570 |
| ENSP00000262315 | ENSP00000322957 |
| ENSP00000262315 | ENSP00000323663 |
| ENSP00000262315 | ENSP00000325017 |
| ENSP00000262315 | ENSP00000325863 |
| ENSP00000262315 | ENSP00000328720 |
| ENSP00000262315 | ENSP00000332444 |
| ENSP00000262315 | ENSP00000334188 |
| ENSP00000262315 | ENSP00000335357 |
| ENSP00000262315 | ENSP00000336606 |
| ENSP00000262315 | ENSP00000336868 |
| ENSP00000262315 | ENSP00000340879 |
| ENSP00000262315 | ENSP00000343392 |
| ENSP00000262315 | ENSP00000343741 |
| ENSP00000262315 | ENSP00000343745 |
| ENSP00000262315 | ENSP00000347232 |
| ENSP00000262315 | ENSP00000347719 |
| ENSP00000262315 | ENSP00000350491 |
| ENSP00000262315 | ENSP00000350854 |
| ENSP00000262315 | ENSP00000350967 |
| ENSP00000262315 | ENSP00000351284 |
| ENSP00000262315 | ENSP00000351346 |
| ENSP00000262315 | ENSP00000351697 |
| ENSP00000262315 | ENSP00000352257 |
| ENSP00000262315 | ENSP00000353458 |
| ENSP00000262315 | ENSP00000353793 |
| ENSP00000262315 | ENSP00000354522 |
| ENSP00000262315 | ENSP00000354720 |
| ENSP00000262315 | ENSP00000354742 |
| ENSP00000262315 | ENSP00000354916 |

|                 |                 |
|-----------------|-----------------|
| ENSP00000262315 | ENSP00000355560 |
| ENSP00000262315 | ENSP00000355922 |
| ENSP00000262315 | ENSP00000356989 |
| ENSP00000262315 | ENSP00000358886 |
| ENSP00000262315 | ENSP00000359518 |
| ENSP00000262315 | ENSP00000359567 |
| ENSP00000262315 | ENSP00000360310 |
| ENSP00000262315 | ENSP00000360473 |
| ENSP00000262315 | ENSP00000360621 |
| ENSP00000262315 | ENSP00000360803 |
| ENSP00000262315 | ENSP00000363021 |
| ENSP00000262315 | ENSP00000366974 |
| ENSP00000262315 | ENSP00000368349 |
| ENSP00000262315 | ENSP00000368438 |
| ENSP00000262315 | ENSP00000368646 |
| ENSP00000262315 | ENSP00000368976 |
| ENSP00000262315 | ENSP00000369335 |
| ENSP00000262315 | ENSP00000369411 |
| ENSP00000262315 | ENSP00000370151 |
| ENSP00000262315 | ENSP00000371475 |
| ENSP00000262315 | ENSP00000372023 |
| ENSP00000262315 | ENSP00000375809 |
| ENSP00000262315 | ENSP00000377384 |
| ENSP00000262315 | ENSP00000377793 |
| ENSP00000262315 | ENSP00000380504 |
| ENSP00000262315 | ENSP00000381290 |
| ENSP00000262315 | ENSP00000381657 |
| ENSP00000262315 | ENSP00000382562 |
| ENSP00000262315 | ENSP00000384048 |
| ENSP00000262315 | ENSP00000396704 |
| ENSP00000262315 | ENSP00000402515 |
| ENSP00000262315 | ENSP00000413632 |
| ENSP00000262319 | ENSP00000278616 |
| ENSP00000262319 | ENSP00000295901 |
| ENSP00000262319 | ENSP00000313420 |
| ENSP00000262319 | ENSP00000316032 |
| ENSP00000262319 | ENSP00000337797 |
| ENSP00000262319 | ENSP00000343741 |
| ENSP00000262319 | ENSP00000347733 |
| ENSP00000262319 | ENSP00000352257 |
| ENSP00000262319 | ENSP00000353073 |
| ENSP00000262319 | ENSP00000353971 |
| ENSP00000262319 | ENSP00000354558 |
| ENSP00000262319 | ENSP00000357907 |
| ENSP00000262319 | ENSP00000359531 |
| ENSP00000262319 | ENSP00000362546 |

|                 |                 |
|-----------------|-----------------|
| ENSP00000262319 | ENSP00000364847 |
| ENSP00000262319 | ENSP00000367454 |
| ENSP00000262319 | ENSP00000371888 |
| ENSP00000262319 | ENSP00000397435 |
| ENSP00000262319 | ENSP00000402515 |
| ENSP00000262320 | ENSP00000262643 |
| ENSP00000262320 | ENSP00000264552 |
| ENSP00000262320 | ENSP00000266000 |
| ENSP00000262320 | ENSP00000268058 |
| ENSP00000262320 | ENSP00000283195 |
| ENSP00000262320 | ENSP00000288199 |
| ENSP00000262320 | ENSP00000288840 |
| ENSP00000262320 | ENSP00000295901 |
| ENSP00000262320 | ENSP00000296257 |
| ENSP00000262320 | ENSP00000298552 |
| ENSP00000262320 | ENSP00000299259 |
| ENSP00000262320 | ENSP00000302327 |
| ENSP00000262320 | ENSP00000310129 |
| ENSP00000262320 | ENSP00000311344 |
| ENSP00000262320 | ENSP00000311579 |
| ENSP00000262320 | ENSP00000313391 |
| ENSP00000262320 | ENSP00000314499 |
| ENSP00000262320 | ENSP00000325690 |
| ENSP00000262320 | ENSP00000329097 |
| ENSP00000262320 | ENSP00000329117 |
| ENSP00000262320 | ENSP00000337439 |
| ENSP00000262320 | ENSP00000343129 |
| ENSP00000262320 | ENSP00000344456 |
| ENSP00000262320 | ENSP00000345731 |
| ENSP00000262320 | ENSP00000347184 |
| ENSP00000262320 | ENSP00000351492 |
| ENSP00000262320 | ENSP00000352514 |
| ENSP00000262320 | ENSP00000354964 |
| ENSP00000262320 | ENSP00000357442 |
| ENSP00000262320 | ENSP00000359206 |
| ENSP00000262320 | ENSP00000367797 |
| ENSP00000262320 | ENSP00000375986 |
| ENSP00000262320 | ENSP00000382423 |
| ENSP00000262320 | ENSP00000392270 |
| ENSP00000262345 | ENSP00000264818 |
| ENSP00000262345 | ENSP00000303231 |
| ENSP00000262345 | ENSP00000314425 |
| ENSP00000262345 | ENSP00000314499 |
| ENSP00000262366 | ENSP00000264126 |
| ENSP00000262366 | ENSP00000307863 |
| ENSP00000262366 | ENSP00000311825 |

|                 |                 |
|-----------------|-----------------|
| ENSP00000262366 | ENSP00000313059 |
| ENSP00000262366 | ENSP00000325785 |
| ENSP00000262366 | ENSP00000339353 |
| ENSP00000262366 | ENSP00000344456 |
| ENSP00000262366 | ENSP00000351137 |
| ENSP00000262366 | ENSP00000359976 |
| ENSP00000262367 | ENSP00000262518 |
| ENSP00000262367 | ENSP00000262519 |
| ENSP00000262367 | ENSP00000262643 |
| ENSP00000262367 | ENSP00000262904 |
| ENSP00000262367 | ENSP00000263062 |
| ENSP00000262367 | ENSP00000263121 |
| ENSP00000262367 | ENSP00000263205 |
| ENSP00000262367 | ENSP00000264637 |
| ENSP00000262367 | ENSP00000264731 |
| ENSP00000262367 | ENSP00000264834 |
| ENSP00000262367 | ENSP00000265354 |
| ENSP00000262367 | ENSP00000265372 |
| ENSP00000262367 | ENSP00000266000 |
| ENSP00000262367 | ENSP00000267064 |
| ENSP00000262367 | ENSP00000268058 |
| ENSP00000262367 | ENSP00000272134 |
| ENSP00000262367 | ENSP00000272937 |
| ENSP00000262367 | ENSP00000278612 |
| ENSP00000262367 | ENSP00000282030 |
| ENSP00000262367 | ENSP00000282441 |
| ENSP00000262367 | ENSP00000282892 |
| ENSP00000262367 | ENSP00000283290 |
| ENSP00000262367 | ENSP00000283921 |
| ENSP00000262367 | ENSP00000287820 |
| ENSP00000262367 | ENSP00000290663 |
| ENSP00000262367 | ENSP00000291582 |
| ENSP00000262367 | ENSP00000292035 |
| ENSP00000262367 | ENSP00000292535 |
| ENSP00000262367 | ENSP00000294168 |
| ENSP00000262367 | ENSP00000294409 |
| ENSP00000262367 | ENSP00000295025 |
| ENSP00000262367 | ENSP00000296215 |
| ENSP00000262367 | ENSP00000298139 |
| ENSP00000262367 | ENSP00000302111 |
| ENSP00000262367 | ENSP00000302640 |
| ENSP00000262367 | ENSP00000303315 |
| ENSP00000262367 | ENSP00000304169 |
| ENSP00000262367 | ENSP00000305422 |
| ENSP00000262367 | ENSP00000306245 |
| ENSP00000262367 | ENSP00000308741 |

|                 |                 |
|-----------------|-----------------|
| ENSP00000262367 | ENSP00000313829 |
| ENSP00000262367 | ENSP00000314004 |
| ENSP00000262367 | ENSP00000314129 |
| ENSP00000262367 | ENSP00000314499 |
| ENSP00000262367 | ENSP00000314949 |
| ENSP00000262367 | ENSP00000315768 |
| ENSP00000262367 | ENSP00000316032 |
| ENSP00000262367 | ENSP00000316879 |
| ENSP00000262367 | ENSP00000319104 |
| ENSP00000262367 | ENSP00000319169 |
| ENSP00000262367 | ENSP00000321345 |
| ENSP00000262367 | ENSP00000325414 |
| ENSP00000262367 | ENSP00000325634 |
| ENSP00000262367 | ENSP00000325690 |
| ENSP00000262367 | ENSP00000325863 |
| ENSP00000262367 | ENSP00000326767 |
| ENSP00000262367 | ENSP00000326933 |
| ENSP00000262367 | ENSP00000327048 |
| ENSP00000262367 | ENSP00000328103 |
| ENSP00000262367 | ENSP00000329357 |
| ENSP00000262367 | ENSP00000329411 |
| ENSP00000262367 | ENSP00000331057 |
| ENSP00000262367 | ENSP00000334061 |
| ENSP00000262367 | ENSP00000334280 |
| ENSP00000262367 | ENSP00000336790 |
| ENSP00000262367 | ENSP00000338235 |
| ENSP00000262367 | ENSP00000339527 |
| ENSP00000262367 | ENSP00000340896 |
| ENSP00000262367 | ENSP00000341208 |
| ENSP00000262367 | ENSP00000341551 |
| ENSP00000262367 | ENSP00000342307 |
| ENSP00000262367 | ENSP00000343957 |
| ENSP00000262367 | ENSP00000344352 |
| ENSP00000262367 | ENSP00000344456 |
| ENSP00000262367 | ENSP00000344547 |
| ENSP00000262367 | ENSP00000344683 |
| ENSP00000262367 | ENSP00000345681 |
| ENSP00000262367 | ENSP00000346762 |
| ENSP00000262367 | ENSP00000346879 |
| ENSP00000262367 | ENSP00000346886 |
| ENSP00000262367 | ENSP00000347184 |
| ENSP00000262367 | ENSP00000348069 |
| ENSP00000262367 | ENSP00000348551 |
| ENSP00000262367 | ENSP00000348554 |
| ENSP00000262367 | ENSP00000348577 |
| ENSP00000262367 | ENSP00000348632 |

|                 |                 |
|-----------------|-----------------|
| ENSP00000262367 | ENSP00000350199 |
| ENSP00000262367 | ENSP00000350249 |
| ENSP00000262367 | ENSP00000350283 |
| ENSP00000262367 | ENSP00000350633 |
| ENSP00000262367 | ENSP00000350767 |
| ENSP00000262367 | ENSP00000351894 |
| ENSP00000262367 | ENSP00000351908 |
| ENSP00000262367 | ENSP00000352257 |
| ENSP00000262367 | ENSP00000352514 |
| ENSP00000262367 | ENSP00000352673 |
| ENSP00000262367 | ENSP00000353344 |
| ENSP00000262367 | ENSP00000354995 |
| ENSP00000262367 | ENSP00000355001 |
| ENSP00000262367 | ENSP00000355759 |
| ENSP00000262367 | ENSP00000356623 |
| ENSP00000262367 | ENSP00000357047 |
| ENSP00000262367 | ENSP00000357442 |
| ENSP00000262367 | ENSP00000358404 |
| ENSP00000262367 | ENSP00000359290 |
| ENSP00000262367 | ENSP00000359531 |
| ENSP00000262367 | ENSP00000361014 |
| ENSP00000262367 | ENSP00000362013 |
| ENSP00000262367 | ENSP00000362127 |
| ENSP00000262367 | ENSP00000362314 |
| ENSP00000262367 | ENSP00000362592 |
| ENSP00000262367 | ENSP00000362948 |
| ENSP00000262367 | ENSP00000363021 |
| ENSP00000262367 | ENSP00000363804 |
| ENSP00000262367 | ENSP00000364895 |
| ENSP00000262367 | ENSP00000364929 |
| ENSP00000262367 | ENSP00000365588 |
| ENSP00000262367 | ENSP00000365877 |
| ENSP00000262367 | ENSP00000366915 |
| ENSP00000262367 | ENSP00000370408 |
| ENSP00000262367 | ENSP00000371308 |
| ENSP00000262367 | ENSP00000372170 |
| ENSP00000262367 | ENSP00000373060 |
| ENSP00000262367 | ENSP00000376204 |
| ENSP00000262367 | ENSP00000376611 |
| ENSP00000262367 | ENSP00000379003 |
| ENSP00000262367 | ENSP00000380054 |
| ENSP00000262367 | ENSP00000380414 |
| ENSP00000262367 | ENSP00000381031 |
| ENSP00000262367 | ENSP00000381098 |
| ENSP00000262367 | ENSP00000381657 |
| ENSP00000262367 | ENSP00000384523 |

|                 |                 |
|-----------------|-----------------|
| ENSP00000262367 | ENSP00000386165 |
| ENSP00000262367 | ENSP00000386200 |
| ENSP00000262367 | ENSP00000391723 |
| ENSP00000262367 | ENSP00000391774 |
| ENSP00000262367 | ENSP00000394394 |
| ENSP00000262367 | ENSP00000395535 |
| ENSP00000262367 | ENSP00000396876 |
| ENSP00000262367 | ENSP00000399968 |
| ENSP00000262367 | ENSP00000417281 |
| ENSP00000262374 | ENSP00000296292 |
| ENSP00000262374 | ENSP00000315925 |
| ENSP00000262374 | ENSP00000380793 |
| ENSP00000262374 | ENSP00000387477 |
| ENSP00000262374 | ENSP00000417764 |
| ENSP00000262375 | ENSP00000264380 |
| ENSP00000262375 | ENSP00000265351 |
| ENSP00000262375 | ENSP00000266095 |
| ENSP00000262375 | ENSP00000274376 |
| ENSP00000262375 | ENSP00000276533 |
| ENSP00000262375 | ENSP00000282516 |
| ENSP00000262375 | ENSP00000290219 |
| ENSP00000262375 | ENSP00000294053 |
| ENSP00000262375 | ENSP00000297185 |
| ENSP00000262375 | ENSP00000299626 |
| ENSP00000262375 | ENSP00000301585 |
| ENSP00000262375 | ENSP00000329558 |
| ENSP00000262375 | ENSP00000331268 |
| ENSP00000262375 | ENSP00000332353 |
| ENSP00000262375 | ENSP00000340093 |
| ENSP00000262375 | ENSP00000343535 |
| ENSP00000262375 | ENSP00000350283 |
| ENSP00000262375 | ENSP00000360782 |
| ENSP00000262375 | ENSP00000364814 |
| ENSP00000262375 | ENSP00000365891 |
| ENSP00000262375 | ENSP00000366179 |
| ENSP00000262375 | ENSP00000368523 |
| ENSP00000262375 | ENSP00000368565 |
| ENSP00000262375 | ENSP00000387262 |
| ENSP00000262375 | ENSP00000394382 |
| ENSP00000262375 | ENSP00000396292 |
| ENSP00000262375 | ENSP00000404403 |
| ENSP00000262384 | ENSP00000310596 |
| ENSP00000262384 | ENSP00000419371 |
| ENSP00000262394 | ENSP00000282892 |
| ENSP00000262394 | ENSP00000284811 |
| ENSP00000262394 | ENSP00000298937 |

|                 |                 |
|-----------------|-----------------|
| ENSP00000262394 | ENSP00000301764 |
| ENSP00000262394 | ENSP00000304593 |
| ENSP00000262394 | ENSP00000356405 |
| ENSP00000262394 | ENSP00000357907 |
| ENSP00000262394 | ENSP00000360473 |
| ENSP00000262394 | ENSP00000386759 |
| ENSP00000262394 | ENSP00000396937 |
| ENSP00000262406 | ENSP00000334134 |
| ENSP00000262406 | ENSP00000344524 |
| ENSP00000262406 | ENSP00000360141 |
| ENSP00000262419 | ENSP00000264515 |
| ENSP00000262419 | ENSP00000264982 |
| ENSP00000262419 | ENSP00000278886 |
| ENSP00000262419 | ENSP00000293362 |
| ENSP00000262419 | ENSP00000326514 |
| ENSP00000262419 | ENSP00000360532 |
| ENSP00000262419 | ENSP00000362424 |
| ENSP00000262428 | ENSP00000269122 |
| ENSP00000262428 | ENSP00000276416 |
| ENSP00000262428 | ENSP00000300086 |
| ENSP00000262428 | ENSP00000314499 |
| ENSP00000262428 | ENSP00000314879 |
| ENSP00000262428 | ENSP00000326238 |
| ENSP00000262428 | ENSP00000334836 |
| ENSP00000262428 | ENSP00000348163 |
| ENSP00000262428 | ENSP00000348602 |
| ENSP00000262428 | ENSP00000349016 |
| ENSP00000262428 | ENSP00000359225 |
| ENSP00000262428 | ENSP00000386456 |
| ENSP00000262430 | ENSP00000282441 |
| ENSP00000262430 | ENSP00000360286 |
| ENSP00000262430 | ENSP00000361616 |
| ENSP00000262455 | ENSP00000265462 |
| ENSP00000262455 | ENSP00000278572 |
| ENSP00000262455 | ENSP00000292180 |
| ENSP00000262455 | ENSP00000299767 |
| ENSP00000262455 | ENSP00000300896 |
| ENSP00000262455 | ENSP00000318147 |
| ENSP00000262455 | ENSP00000364893 |
| ENSP00000262455 | ENSP00000366434 |
| ENSP00000262455 | ENSP00000379042 |
| ENSP00000262457 | ENSP00000299163 |
| ENSP00000262457 | ENSP00000311505 |
| ENSP00000262457 | ENSP00000313169 |
| ENSP00000262457 | ENSP00000314004 |
| ENSP00000262457 | ENSP00000331310 |



|                 |                 |
|-----------------|-----------------|
| ENSP00000262457 | ENSP00000338766 |
| ENSP00000262457 | ENSP00000356774 |
| ENSP00000262460 | ENSP00000263201 |
| ENSP00000262460 | ENSP00000265056 |
| ENSP00000262460 | ENSP00000265140 |
| ENSP00000262460 | ENSP00000265465 |
| ENSP00000262460 | ENSP00000276533 |
| ENSP00000262460 | ENSP00000294016 |
| ENSP00000262460 | ENSP00000296509 |
| ENSP00000262460 | ENSP00000298288 |
| ENSP00000262460 | ENSP00000312870 |
| ENSP00000262460 | ENSP00000322180 |
| ENSP00000262460 | ENSP00000322570 |
| ENSP00000262460 | ENSP00000340879 |
| ENSP00000262460 | ENSP00000344874 |
| ENSP00000262460 | ENSP00000351697 |
| ENSP00000262460 | ENSP00000353793 |
| ENSP00000262460 | ENSP00000354920 |
| ENSP00000262460 | ENSP00000356825 |
| ENSP00000262460 | ENSP00000368349 |
| ENSP00000262460 | ENSP00000368438 |
| ENSP00000262460 | ENSP00000370151 |
| ENSP00000262460 | ENSP00000380504 |
| ENSP00000262460 | ENSP00000384223 |
| ENSP00000262460 | ENSP00000386357 |
| ENSP00000262460 | ENSP00000401018 |
| ENSP00000262460 | ENSP00000413632 |
| ENSP00000262460 | ENSP00000419361 |
| ENSP00000262461 | ENSP00000348278 |
| ENSP00000262507 | ENSP00000265896 |
| ENSP00000262507 | ENSP00000288532 |
| ENSP00000262507 | ENSP00000300452 |
| ENSP00000262507 | ENSP00000310547 |
| ENSP00000262507 | ENSP00000322316 |
| ENSP00000262507 | ENSP00000333946 |
| ENSP00000262507 | ENSP00000342056 |
| ENSP00000262507 | ENSP00000355517 |
| ENSP00000262507 | ENSP00000355739 |
| ENSP00000262510 | ENSP00000336762 |
| ENSP00000262518 | ENSP00000262519 |
| ENSP00000262518 | ENSP00000263062 |
| ENSP00000262518 | ENSP00000263116 |
| ENSP00000262518 | ENSP00000263208 |
| ENSP00000262518 | ENSP00000263377 |
| ENSP00000262518 | ENSP00000263390 |
| ENSP00000262518 | ENSP00000263974 |

|                 |                 |
|-----------------|-----------------|
| ENSP00000262518 | ENSP00000264501 |
| ENSP00000262518 | ENSP00000264515 |
| ENSP00000262518 | ENSP00000265990 |
| ENSP00000262518 | ENSP00000266070 |
| ENSP00000262518 | ENSP00000267064 |
| ENSP00000262518 | ENSP00000267197 |
| ENSP00000262518 | ENSP00000269385 |
| ENSP00000262518 | ENSP00000269468 |
| ENSP00000262518 | ENSP00000276072 |
| ENSP00000262518 | ENSP00000280190 |
| ENSP00000262518 | ENSP00000283882 |
| ENSP00000262518 | ENSP00000286317 |
| ENSP00000262518 | ENSP00000286428 |
| ENSP00000262518 | ENSP00000287598 |
| ENSP00000262518 | ENSP00000291688 |
| ENSP00000262518 | ENSP00000295066 |
| ENSP00000262518 | ENSP00000296509 |
| ENSP00000262518 | ENSP00000296786 |
| ENSP00000262518 | ENSP00000299601 |
| ENSP00000262518 | ENSP00000300648 |
| ENSP00000262518 | ENSP00000301740 |
| ENSP00000262518 | ENSP00000302160 |
| ENSP00000262518 | ENSP00000302530 |
| ENSP00000262518 | ENSP00000304593 |
| ENSP00000262518 | ENSP00000306983 |
| ENSP00000262518 | ENSP00000307023 |
| ENSP00000262518 | ENSP00000307208 |
| ENSP00000262518 | ENSP00000310448 |
| ENSP00000262518 | ENSP00000310521 |
| ENSP00000262518 | ENSP00000310649 |
| ENSP00000262518 | ENSP00000312697 |
| ENSP00000262518 | ENSP00000312778 |
| ENSP00000262518 | ENSP00000313171 |
| ENSP00000262518 | ENSP00000314311 |
| ENSP00000262518 | ENSP00000315791 |
| ENSP00000262518 | ENSP00000320566 |
| ENSP00000262518 | ENSP00000322579 |
| ENSP00000262518 | ENSP00000323302 |
| ENSP00000262518 | ENSP00000323720 |
| ENSP00000262518 | ENSP00000325677 |
| ENSP00000262518 | ENSP00000325690 |
| ENSP00000262518 | ENSP00000325863 |
| ENSP00000262518 | ENSP00000329933 |
| ENSP00000262518 | ENSP00000331310 |
| ENSP00000262518 | ENSP00000334061 |
| ENSP00000262518 | ENSP00000334188 |

|                 |                 |
|-----------------|-----------------|
| ENSP00000262518 | ENSP00000336842 |
| ENSP00000262518 | ENSP00000337405 |
| ENSP00000262518 | ENSP00000339090 |
| ENSP00000262518 | ENSP00000340271 |
| ENSP00000262518 | ENSP00000340896 |
| ENSP00000262518 | ENSP00000341159 |
| ENSP00000262518 | ENSP00000347168 |
| ENSP00000262518 | ENSP00000347719 |
| ENSP00000262518 | ENSP00000349213 |
| ENSP00000262518 | ENSP00000350767 |
| ENSP00000262518 | ENSP00000352738 |
| ENSP00000262518 | ENSP00000353622 |
| ENSP00000262518 | ENSP00000355013 |
| ENSP00000262518 | ENSP00000356405 |
| ENSP00000262518 | ENSP00000356989 |
| ENSP00000262518 | ENSP00000357887 |
| ENSP00000262518 | ENSP00000359518 |
| ENSP00000262518 | ENSP00000360116 |
| ENSP00000262518 | ENSP00000360473 |
| ENSP00000262518 | ENSP00000360515 |
| ENSP00000262518 | ENSP00000362166 |
| ENSP00000262518 | ENSP00000362352 |
| ENSP00000262518 | ENSP00000362532 |
| ENSP00000262518 | ENSP00000362592 |
| ENSP00000262518 | ENSP00000362900 |
| ENSP00000262518 | ENSP00000363313 |
| ENSP00000262518 | ENSP00000363734 |
| ENSP00000262518 | ENSP00000364929 |
| ENSP00000262518 | ENSP00000366135 |
| ENSP00000262518 | ENSP00000366974 |
| ENSP00000262518 | ENSP00000367034 |
| ENSP00000262518 | ENSP00000369335 |
| ENSP00000262518 | ENSP00000369695 |
| ENSP00000262518 | ENSP00000370611 |
| ENSP00000262518 | ENSP00000372694 |
| ENSP00000262518 | ENSP00000374213 |
| ENSP00000262518 | ENSP00000374280 |
| ENSP00000262518 | ENSP00000374529 |
| ENSP00000262518 | ENSP00000375986 |
| ENSP00000262518 | ENSP00000376204 |
| ENSP00000262518 | ENSP00000379217 |
| ENSP00000262518 | ENSP00000380460 |
| ENSP00000262518 | ENSP00000382562 |
| ENSP00000262518 | ENSP00000386759 |
| ENSP00000262518 | ENSP00000390475 |
| ENSP00000262518 | ENSP00000399968 |

|                 |                 |
|-----------------|-----------------|
| ENSP00000262518 | ENSP00000402240 |
| ENSP00000262518 | ENSP00000406293 |
| ENSP00000262518 | ENSP00000412319 |
| ENSP00000262518 | ENSP00000415678 |
| ENSP00000262519 | ENSP00000263201 |
| ENSP00000262519 | ENSP00000264108 |
| ENSP00000262519 | ENSP00000264515 |
| ENSP00000262519 | ENSP00000264951 |
| ENSP00000262519 | ENSP00000278412 |
| ENSP00000262519 | ENSP00000278616 |
| ENSP00000262519 | ENSP00000280190 |
| ENSP00000262519 | ENSP00000283875 |
| ENSP00000262519 | ENSP00000286835 |
| ENSP00000262519 | ENSP00000290158 |
| ENSP00000262519 | ENSP00000295066 |
| ENSP00000262519 | ENSP00000296490 |
| ENSP00000262519 | ENSP00000296755 |
| ENSP00000262519 | ENSP00000297792 |
| ENSP00000262519 | ENSP00000300231 |
| ENSP00000262519 | ENSP00000300658 |
| ENSP00000262519 | ENSP00000304360 |
| ENSP00000262519 | ENSP00000304593 |
| ENSP00000262519 | ENSP00000307272 |
| ENSP00000262519 | ENSP00000309555 |
| ENSP00000262519 | ENSP00000311513 |
| ENSP00000262519 | ENSP00000312735 |
| ENSP00000262519 | ENSP00000312778 |
| ENSP00000262519 | ENSP00000314949 |
| ENSP00000262519 | ENSP00000317334 |
| ENSP00000262519 | ENSP00000319169 |
| ENSP00000262519 | ENSP00000320566 |
| ENSP00000262519 | ENSP00000325677 |
| ENSP00000262519 | ENSP00000329933 |
| ENSP00000262519 | ENSP00000340879 |
| ENSP00000262519 | ENSP00000340896 |
| ENSP00000262519 | ENSP00000341280 |
| ENSP00000262519 | ENSP00000343741 |
| ENSP00000262519 | ENSP00000348551 |
| ENSP00000262519 | ENSP00000349049 |
| ENSP00000262519 | ENSP00000351284 |
| ENSP00000262519 | ENSP00000352821 |
| ENSP00000262519 | ENSP00000353698 |
| ENSP00000262519 | ENSP00000353998 |
| ENSP00000262519 | ENSP00000354720 |
| ENSP00000262519 | ENSP00000354977 |
| ENSP00000262519 | ENSP00000355013 |

|                 |                 |
|-----------------|-----------------|
| ENSP00000262519 | ENSP00000356146 |
| ENSP00000262519 | ENSP00000357887 |
| ENSP00000262519 | ENSP00000360621 |
| ENSP00000262519 | ENSP00000362352 |
| ENSP00000262519 | ENSP00000366974 |
| ENSP00000262519 | ENSP00000369716 |
| ENSP00000262519 | ENSP00000370151 |
| ENSP00000262519 | ENSP00000370968 |
| ENSP00000262519 | ENSP00000371475 |
| ENSP00000262519 | ENSP00000374152 |
| ENSP00000262519 | ENSP00000374213 |
| ENSP00000262519 | ENSP00000374280 |
| ENSP00000262519 | ENSP00000376946 |
| ENSP00000262519 | ENSP00000377747 |
| ENSP00000262519 | ENSP00000381657 |
| ENSP00000262519 | ENSP00000382688 |
| ENSP00000262519 | ENSP00000386759 |
| ENSP00000262519 | ENSP00000390475 |
| ENSP00000262519 | ENSP00000414321 |
| ENSP00000262544 | ENSP00000276014 |
| ENSP00000262544 | ENSP00000294179 |
| ENSP00000262544 | ENSP00000296137 |
| ENSP00000262544 | ENSP00000299601 |
| ENSP00000262544 | ENSP00000299767 |
| ENSP00000262544 | ENSP00000311134 |
| ENSP00000262544 | ENSP00000316032 |
| ENSP00000262544 | ENSP00000329466 |
| ENSP00000262544 | ENSP00000342381 |
| ENSP00000262544 | ENSP00000342889 |
| ENSP00000262544 | ENSP00000344460 |
| ENSP00000262544 | ENSP00000345530 |
| ENSP00000262544 | ENSP00000354791 |
| ENSP00000262544 | ENSP00000356530 |
| ENSP00000262544 | ENSP00000357480 |
| ENSP00000262544 | ENSP00000362399 |
| ENSP00000262544 | ENSP00000363944 |
| ENSP00000262544 | ENSP00000364898 |
| ENSP00000262544 | ENSP00000371888 |
| ENSP00000262544 | ENSP00000377280 |
| ENSP00000262544 | ENSP00000379228 |
| ENSP00000262544 | ENSP00000390783 |
| ENSP00000262544 | ENSP00000401445 |
| ENSP00000262554 | ENSP00000264335 |
| ENSP00000262554 | ENSP00000282412 |
| ENSP00000262554 | ENSP00000297313 |
| ENSP00000262554 | ENSP00000304500 |

|                 |                 |
|-----------------|-----------------|
| ENSP00000262554 | ENSP00000326699 |
| ENSP00000262554 | ENSP00000337463 |
| ENSP00000262554 | ENSP00000341213 |
| ENSP00000262554 | ENSP00000344106 |
| ENSP00000262554 | ENSP00000348455 |
| ENSP00000262554 | ENSP00000354347 |
| ENSP00000262554 | ENSP00000354519 |
| ENSP00000262554 | ENSP00000355968 |
| ENSP00000262554 | ENSP00000361287 |
| ENSP00000262554 | ENSP00000364188 |
| ENSP00000262554 | ENSP00000364847 |
| ENSP00000262554 | ENSP00000366748 |
| ENSP00000262554 | ENSP00000370607 |
| ENSP00000262554 | ENSP00000382723 |
| ENSP00000262554 | ENSP00000389516 |
| ENSP00000262554 | ENSP00000395863 |
| ENSP00000262554 | ENSP00000401287 |
| ENSP00000262554 | ENSP00000405864 |
| ENSP00000262554 | ENSP00000412805 |
| ENSP00000262577 | ENSP00000291386 |
| ENSP00000262577 | ENSP00000315791 |
| ENSP00000262577 | ENSP00000317872 |
| ENSP00000262577 | ENSP00000339353 |
| ENSP00000262577 | ENSP00000348010 |
| ENSP00000262577 | ENSP00000355185 |
| ENSP00000262577 | ENSP00000358576 |
| ENSP00000262577 | ENSP00000367527 |
| ENSP00000262577 | ENSP00000398208 |
| ENSP00000262584 | ENSP00000262812 |
| ENSP00000262584 | ENSP00000263629 |
| ENSP00000262584 | ENSP00000263857 |
| ENSP00000262584 | ENSP00000264951 |
| ENSP00000262584 | ENSP00000264995 |
| ENSP00000262584 | ENSP00000265100 |
| ENSP00000262584 | ENSP00000265245 |
| ENSP00000262584 | ENSP00000268206 |
| ENSP00000262584 | ENSP00000268379 |
| ENSP00000262584 | ENSP00000268661 |
| ENSP00000262584 | ENSP00000270625 |
| ENSP00000262584 | ENSP00000272418 |
| ENSP00000262584 | ENSP00000274242 |
| ENSP00000262584 | ENSP00000274606 |
| ENSP00000262584 | ENSP00000277632 |
| ENSP00000262584 | ENSP00000278572 |
| ENSP00000262584 | ENSP00000287038 |
| ENSP00000262584 | ENSP00000289371 |

|                 |                 |
|-----------------|-----------------|
| ENSP00000262584 | ENSP00000294189 |
| ENSP00000262584 | ENSP00000296577 |
| ENSP00000262584 | ENSP00000296783 |
| ENSP00000262584 | ENSP00000296802 |
| ENSP00000262584 | ENSP00000296805 |
| ENSP00000262584 | ENSP00000297908 |
| ENSP00000262584 | ENSP00000298283 |
| ENSP00000262584 | ENSP00000298310 |
| ENSP00000262584 | ENSP00000302886 |
| ENSP00000262584 | ENSP00000305702 |
| ENSP00000262584 | ENSP00000306548 |
| ENSP00000262584 | ENSP00000307889 |
| ENSP00000262584 | ENSP00000309334 |
| ENSP00000262584 | ENSP00000309830 |
| ENSP00000262584 | ENSP00000311028 |
| ENSP00000262584 | ENSP00000311430 |
| ENSP00000262584 | ENSP00000314348 |
| ENSP00000262584 | ENSP00000314949 |
| ENSP00000262584 | ENSP00000317376 |
| ENSP00000262584 | ENSP00000318646 |
| ENSP00000262584 | ENSP00000319851 |
| ENSP00000262584 | ENSP00000322419 |
| ENSP00000262584 | ENSP00000329466 |
| ENSP00000262584 | ENSP00000333667 |
| ENSP00000262584 | ENSP00000333837 |
| ENSP00000262584 | ENSP00000336702 |
| ENSP00000262584 | ENSP00000337839 |
| ENSP00000262584 | ENSP00000338573 |
| ENSP00000262584 | ENSP00000339095 |
| ENSP00000262584 | ENSP00000339795 |
| ENSP00000262584 | ENSP00000341082 |
| ENSP00000262584 | ENSP00000341885 |
| ENSP00000262584 | ENSP00000343392 |
| ENSP00000262584 | ENSP00000343885 |
| ENSP00000262584 | ENSP00000345156 |
| ENSP00000262584 | ENSP00000346015 |
| ENSP00000262584 | ENSP00000346022 |
| ENSP00000262584 | ENSP00000346027 |
| ENSP00000262584 | ENSP00000346037 |
| ENSP00000262584 | ENSP00000346050 |
| ENSP00000262584 | ENSP00000346088 |
| ENSP00000262584 | ENSP00000346725 |
| ENSP00000262584 | ENSP00000347087 |
| ENSP00000262584 | ENSP00000354040 |
| ENSP00000262584 | ENSP00000354125 |
| ENSP00000262584 | ENSP00000354739 |

|                 |                 |
|-----------------|-----------------|
| ENSP00000262584 | ENSP00000356290 |
| ENSP00000262584 | ENSP00000358695 |
| ENSP00000262584 | ENSP00000359345 |
| ENSP00000262584 | ENSP00000361076 |
| ENSP00000262584 | ENSP00000362306 |
| ENSP00000262584 | ENSP00000362334 |
| ENSP00000262584 | ENSP00000362744 |
| ENSP00000262584 | ENSP00000363018 |
| ENSP00000262584 | ENSP00000363559 |
| ENSP00000262584 | ENSP00000363676 |
| ENSP00000262584 | ENSP00000364320 |
| ENSP00000262584 | ENSP00000365806 |
| ENSP00000262584 | ENSP00000366519 |
| ENSP00000262584 | ENSP00000369757 |
| ENSP00000262584 | ENSP00000370589 |
| ENSP00000262584 | ENSP00000373090 |
| ENSP00000262584 | ENSP00000375730 |
| ENSP00000262584 | ENSP00000377486 |
| ENSP00000262584 | ENSP00000377617 |
| ENSP00000262584 | ENSP00000377640 |
| ENSP00000262584 | ENSP00000377865 |
| ENSP00000262584 | ENSP00000378160 |
| ENSP00000262584 | ENSP00000379607 |
| ENSP00000262584 | ENSP00000379888 |
| ENSP00000262584 | ENSP00000380156 |
| ENSP00000262584 | ENSP00000380453 |
| ENSP00000262584 | ENSP00000380982 |
| ENSP00000262584 | ENSP00000382392 |
| ENSP00000262584 | ENSP00000386717 |
| ENSP00000262584 | ENSP00000388330 |
| ENSP00000262584 | ENSP00000389103 |
| ENSP00000262584 | ENSP00000391723 |
| ENSP00000262584 | ENSP00000393241 |
| ENSP00000262584 | ENSP00000393393 |
| ENSP00000262584 | ENSP00000394290 |
| ENSP00000262584 | ENSP00000401371 |
| ENSP00000262584 | ENSP00000402338 |
| ENSP00000262584 | ENSP00000403175 |
| ENSP00000262584 | ENSP00000403576 |
| ENSP00000262584 | ENSP00000403852 |
| ENSP00000262584 | ENSP00000409074 |
| ENSP00000262584 | ENSP00000409367 |
| ENSP00000262584 | ENSP00000411162 |
| ENSP00000262584 | ENSP00000412583 |
| ENSP00000262584 | ENSP00000414321 |
| ENSP00000262584 | ENSP00000416110 |



|                 |                 |
|-----------------|-----------------|
| ENSP00000262584 | ENSP00000417229 |
| ENSP00000262584 | ENSP00000419599 |
| ENSP00000262585 | ENSP00000282441 |
| ENSP00000262607 | ENSP00000264220 |
| ENSP00000262607 | ENSP00000286621 |
| ENSP00000262607 | ENSP00000301740 |
| ENSP00000262607 | ENSP00000307684 |
| ENSP00000262607 | ENSP00000367615 |
| ENSP00000262608 | ENSP00000263620 |
| ENSP00000262608 | ENSP00000263974 |
| ENSP00000262608 | ENSP00000264183 |
| ENSP00000262608 | ENSP00000264193 |
| ENSP00000262608 | ENSP00000265990 |
| ENSP00000262608 | ENSP00000269127 |
| ENSP00000262608 | ENSP00000276072 |
| ENSP00000262608 | ENSP00000279873 |
| ENSP00000262608 | ENSP00000297338 |
| ENSP00000262608 | ENSP00000303315 |
| ENSP00000262608 | ENSP00000306983 |
| ENSP00000262608 | ENSP00000307208 |
| ENSP00000262608 | ENSP00000316114 |
| ENSP00000262608 | ENSP00000322579 |
| ENSP00000262608 | ENSP00000323720 |
| ENSP00000262608 | ENSP00000334061 |
| ENSP00000262608 | ENSP00000335044 |
| ENSP00000262608 | ENSP00000337393 |
| ENSP00000262608 | ENSP00000347602 |
| ENSP00000262608 | ENSP00000349213 |
| ENSP00000262608 | ENSP00000350078 |
| ENSP00000262608 | ENSP00000350967 |
| ENSP00000262608 | ENSP00000353622 |
| ENSP00000262608 | ENSP00000354633 |
| ENSP00000262608 | ENSP00000354673 |
| ENSP00000262608 | ENSP00000355205 |
| ENSP00000262608 | ENSP00000356530 |
| ENSP00000262608 | ENSP00000359290 |
| ENSP00000262608 | ENSP00000360676 |
| ENSP00000262608 | ENSP00000361998 |
| ENSP00000262608 | ENSP00000362068 |
| ENSP00000262608 | ENSP00000363779 |
| ENSP00000262608 | ENSP00000369695 |
| ENSP00000262608 | ENSP00000373340 |
| ENSP00000262608 | ENSP00000377747 |
| ENSP00000262608 | ENSP00000379372 |
| ENSP00000262608 | ENSP00000381657 |
| ENSP00000262608 | ENSP00000392028 |

|                 |                 |
|-----------------|-----------------|
| ENSP00000262608 | ENSP00000401445 |
| ENSP00000262629 | ENSP00000311035 |
| ENSP00000262629 | ENSP00000362205 |
| ENSP00000262629 | ENSP00000364898 |
| ENSP00000262629 | ENSP00000371328 |
| ENSP00000262630 | ENSP00000289081 |
| ENSP00000262630 | ENSP00000338157 |
| ENSP00000262630 | ENSP00000345681 |
| ENSP00000262633 | ENSP00000309166 |
| ENSP00000262633 | ENSP00000315859 |
| ENSP00000262633 | ENSP00000352941 |
| ENSP00000262633 | ENSP00000363313 |
| ENSP00000262633 | ENSP00000365439 |
| ENSP00000262643 | ENSP00000262904 |
| ENSP00000262643 | ENSP00000263121 |
| ENSP00000262643 | ENSP00000264160 |
| ENSP00000262643 | ENSP00000265069 |
| ENSP00000262643 | ENSP00000265433 |
| ENSP00000262643 | ENSP00000265717 |
| ENSP00000262643 | ENSP00000267101 |
| ENSP00000262643 | ENSP00000267163 |
| ENSP00000262643 | ENSP00000268043 |
| ENSP00000262643 | ENSP00000269214 |
| ENSP00000262643 | ENSP00000269385 |
| ENSP00000262643 | ENSP00000269397 |
| ENSP00000262643 | ENSP00000274255 |
| ENSP00000262643 | ENSP00000276893 |
| ENSP00000262643 | ENSP00000277541 |
| ENSP00000262643 | ENSP00000278412 |
| ENSP00000262643 | ENSP00000278612 |
| ENSP00000262643 | ENSP00000278616 |
| ENSP00000262643 | ENSP00000281537 |
| ENSP00000262643 | ENSP00000281708 |
| ENSP00000262643 | ENSP00000286364 |
| ENSP00000262643 | ENSP00000287239 |
| ENSP00000262643 | ENSP00000287598 |
| ENSP00000262643 | ENSP00000295025 |
| ENSP00000262643 | ENSP00000296509 |
| ENSP00000262643 | ENSP00000297261 |
| ENSP00000262643 | ENSP00000298552 |
| ENSP00000262643 | ENSP00000301019 |
| ENSP00000262643 | ENSP00000302530 |
| ENSP00000262643 | ENSP00000306999 |
| ENSP00000262643 | ENSP00000309871 |
| ENSP00000262643 | ENSP00000312385 |
| ENSP00000262643 | ENSP00000313084 |

|                 |                 |
|-----------------|-----------------|
| ENSP00000262643 | ENSP00000313420 |
| ENSP00000262643 | ENSP00000319279 |
| ENSP00000262643 | ENSP00000320485 |
| ENSP00000262643 | ENSP00000321636 |
| ENSP00000262643 | ENSP00000322180 |
| ENSP00000262643 | ENSP00000325863 |
| ENSP00000262643 | ENSP00000330074 |
| ENSP00000262643 | ENSP00000332353 |
| ENSP00000262643 | ENSP00000335321 |
| ENSP00000262643 | ENSP00000339299 |
| ENSP00000262643 | ENSP00000340896 |
| ENSP00000262643 | ENSP00000341551 |
| ENSP00000262643 | ENSP00000342307 |
| ENSP00000262643 | ENSP00000343785 |
| ENSP00000262643 | ENSP00000344456 |
| ENSP00000262643 | ENSP00000344504 |
| ENSP00000262643 | ENSP00000345731 |
| ENSP00000262643 | ENSP00000347602 |
| ENSP00000262643 | ENSP00000348550 |
| ENSP00000262643 | ENSP00000348573 |
| ENSP00000262643 | ENSP00000350283 |
| ENSP00000262643 | ENSP00000350491 |
| ENSP00000262643 | ENSP00000351284 |
| ENSP00000262643 | ENSP00000351492 |
| ENSP00000262643 | ENSP00000352121 |
| ENSP00000262643 | ENSP00000353344 |
| ENSP00000262643 | ENSP00000353622 |
| ENSP00000262643 | ENSP00000354558 |
| ENSP00000262643 | ENSP00000355010 |
| ENSP00000262643 | ENSP00000355865 |
| ENSP00000262643 | ENSP00000356595 |
| ENSP00000262643 | ENSP00000356655 |
| ENSP00000262643 | ENSP00000357442 |
| ENSP00000262643 | ENSP00000358799 |
| ENSP00000262643 | ENSP00000359652 |
| ENSP00000262643 | ENSP00000363193 |
| ENSP00000262643 | ENSP00000363827 |
| ENSP00000262643 | ENSP00000364524 |
| ENSP00000262643 | ENSP00000364912 |
| ENSP00000262643 | ENSP00000366863 |
| ENSP00000262643 | ENSP00000367972 |
| ENSP00000262643 | ENSP00000368678 |
| ENSP00000262643 | ENSP00000368686 |
| ENSP00000262643 | ENSP00000368698 |
| ENSP00000262643 | ENSP00000369497 |
| ENSP00000262643 | ENSP00000369757 |

|                 |                 |
|-----------------|-----------------|
| ENSP00000262643 | ENSP00000376204 |
| ENSP00000262643 | ENSP00000377793 |
| ENSP00000262643 | ENSP00000377862 |
| ENSP00000262643 | ENSP00000378295 |
| ENSP00000262643 | ENSP00000380256 |
| ENSP00000262643 | ENSP00000383986 |
| ENSP00000262643 | ENSP00000414259 |
| ENSP00000262644 | ENSP00000263791 |
| ENSP00000262644 | ENSP00000285928 |
| ENSP00000262644 | ENSP00000286317 |
| ENSP00000262644 | ENSP00000292180 |
| ENSP00000262644 | ENSP00000304604 |
| ENSP00000262644 | ENSP00000304668 |
| ENSP00000262644 | ENSP00000314441 |
| ENSP00000262644 | ENSP00000343081 |
| ENSP00000262644 | ENSP00000344460 |
| ENSP00000262644 | ENSP00000345731 |
| ENSP00000262644 | ENSP00000346142 |
| ENSP00000262644 | ENSP00000347206 |
| ENSP00000262644 | ENSP00000348722 |
| ENSP00000262644 | ENSP00000367408 |
| ENSP00000262644 | ENSP00000370741 |
| ENSP00000262648 | ENSP00000307046 |
| ENSP00000262710 | ENSP00000315859 |
| ENSP00000262710 | ENSP00000326261 |
| ENSP00000262710 | ENSP00000326514 |
| ENSP00000262710 | ENSP00000329466 |
| ENSP00000262710 | ENSP00000337340 |
| ENSP00000262710 | ENSP00000377262 |
| ENSP00000262710 | ENSP00000379607 |
| ENSP00000262715 | ENSP00000264515 |
| ENSP00000262715 | ENSP00000264951 |
| ENSP00000262715 | ENSP00000266126 |
| ENSP00000262715 | ENSP00000282007 |
| ENSP00000262715 | ENSP00000290541 |
| ENSP00000262715 | ENSP00000304604 |
| ENSP00000262715 | ENSP00000309572 |
| ENSP00000262715 | ENSP00000310596 |
| ENSP00000262715 | ENSP00000318861 |
| ENSP00000262715 | ENSP00000331817 |
| ENSP00000262715 | ENSP00000339191 |
| ENSP00000262715 | ENSP00000340896 |
| ENSP00000262715 | ENSP00000356811 |
| ENSP00000262715 | ENSP00000356989 |
| ENSP00000262715 | ENSP00000360310 |
| ENSP00000262715 | ENSP00000361433 |

|                 |                 |
|-----------------|-----------------|
| ENSP00000262726 | ENSP00000263119 |
| ENSP00000262726 | ENSP00000311505 |
| ENSP00000262726 | ENSP00000340278 |
| ENSP00000262726 | ENSP00000352608 |
| ENSP00000262726 | ENSP00000353622 |
| ENSP00000262726 | ENSP00000377372 |
| ENSP00000262726 | ENSP00000378306 |
| ENSP00000262764 | ENSP00000265276 |
| ENSP00000262764 | ENSP00000265689 |
| ENSP00000262764 | ENSP00000272645 |
| ENSP00000262764 | ENSP00000273037 |
| ENSP00000262764 | ENSP00000284601 |
| ENSP00000262764 | ENSP00000307850 |
| ENSP00000262764 | ENSP00000355607 |
| ENSP00000262764 | ENSP00000358497 |
| ENSP00000262764 | ENSP00000369860 |
| ENSP00000262764 | ENSP00000375986 |
| ENSP00000262764 | ENSP00000376268 |
| ENSP00000262764 | ENSP00000387185 |
| ENSP00000262764 | ENSP00000396452 |
| ENSP00000262765 | ENSP00000265388 |
| ENSP00000262765 | ENSP00000290158 |
| ENSP00000262765 | ENSP00000291688 |
| ENSP00000262765 | ENSP00000307525 |
| ENSP00000262765 | ENSP00000308622 |
| ENSP00000262765 | ENSP00000312318 |
| ENSP00000262765 | ENSP00000316032 |
| ENSP00000262765 | ENSP00000323046 |
| ENSP00000262765 | ENSP00000336712 |
| ENSP00000262765 | ENSP00000346453 |
| ENSP00000262765 | ENSP00000348577 |
| ENSP00000262765 | ENSP00000361418 |
| ENSP00000262765 | ENSP00000361433 |
| ENSP00000262765 | ENSP00000364289 |
| ENSP00000262765 | ENSP00000366135 |
| ENSP00000262765 | ENSP00000369042 |
| ENSP00000262765 | ENSP00000371559 |
| ENSP00000262776 | ENSP00000263056 |
| ENSP00000262776 | ENSP00000304236 |
| ENSP00000262776 | ENSP00000329967 |
| ENSP00000262776 | ENSP00000346839 |
| ENSP00000262776 | ENSP00000355180 |
| ENSP00000262776 | ENSP00000379607 |
| ENSP00000262794 | ENSP00000262803 |
| ENSP00000262794 | ENSP00000264645 |
| ENSP00000262794 | ENSP00000268043 |

|                 |                 |
|-----------------|-----------------|
| ENSP00000262794 | ENSP00000280665 |
| ENSP00000262794 | ENSP00000286835 |
| ENSP00000262794 | ENSP00000292478 |
| ENSP00000262794 | ENSP00000307525 |
| ENSP00000262794 | ENSP00000311873 |
| ENSP00000262794 | ENSP00000312042 |
| ENSP00000262794 | ENSP00000325863 |
| ENSP00000262794 | ENSP00000343745 |
| ENSP00000262794 | ENSP00000349208 |
| ENSP00000262794 | ENSP00000356146 |
| ENSP00000262794 | ENSP00000358799 |
| ENSP00000262794 | ENSP00000361949 |
| ENSP00000262794 | ENSP00000363021 |
| ENSP00000262794 | ENSP00000363745 |
| ENSP00000262794 | ENSP00000366843 |
| ENSP00000262794 | ENSP00000369335 |
| ENSP00000262794 | ENSP00000370150 |
| ENSP00000262794 | ENSP00000373272 |
| ENSP00000262803 | ENSP00000263073 |
| ENSP00000262803 | ENSP00000263208 |
| ENSP00000262803 | ENSP00000263228 |
| ENSP00000262803 | ENSP00000264645 |
| ENSP00000262803 | ENSP00000264705 |
| ENSP00000262803 | ENSP00000264951 |
| ENSP00000262803 | ENSP00000268043 |
| ENSP00000262803 | ENSP00000268482 |
| ENSP00000262803 | ENSP00000270066 |
| ENSP00000262803 | ENSP00000276201 |
| ENSP00000262803 | ENSP00000278572 |
| ENSP00000262803 | ENSP00000286835 |
| ENSP00000262803 | ENSP00000294053 |
| ENSP00000262803 | ENSP00000296577 |
| ENSP00000262803 | ENSP00000300648 |
| ENSP00000262803 | ENSP00000300917 |
| ENSP00000262803 | ENSP00000302160 |
| ENSP00000262803 | ENSP00000304370 |
| ENSP00000262803 | ENSP00000307525 |
| ENSP00000262803 | ENSP00000309433 |
| ENSP00000262803 | ENSP00000309572 |
| ENSP00000262803 | ENSP00000310040 |
| ENSP00000262803 | ENSP00000310260 |
| ENSP00000262803 | ENSP00000310596 |
| ENSP00000262803 | ENSP00000314949 |
| ENSP00000262803 | ENSP00000315859 |
| ENSP00000262803 | ENSP00000316032 |
| ENSP00000262803 | ENSP00000319977 |

|                 |                 |
|-----------------|-----------------|
| ENSP00000262803 | ENSP00000320503 |
| ENSP00000262803 | ENSP00000325677 |
| ENSP00000262803 | ENSP00000325863 |
| ENSP00000262803 | ENSP00000326261 |
| ENSP00000262803 | ENSP00000326424 |
| ENSP00000262803 | ENSP00000326806 |
| ENSP00000262803 | ENSP00000327309 |
| ENSP00000262803 | ENSP00000329466 |
| ENSP00000262803 | ENSP00000329715 |
| ENSP00000262803 | ENSP00000331310 |
| ENSP00000262803 | ENSP00000331817 |
| ENSP00000262803 | ENSP00000331907 |
| ENSP00000262803 | ENSP00000334148 |
| ENSP00000262803 | ENSP00000336931 |
| ENSP00000262803 | ENSP00000340766 |
| ENSP00000262803 | ENSP00000343741 |
| ENSP00000262803 | ENSP00000343745 |
| ENSP00000262803 | ENSP00000346120 |
| ENSP00000262803 | ENSP00000347733 |
| ENSP00000262803 | ENSP00000348708 |
| ENSP00000262803 | ENSP00000350512 |
| ENSP00000262803 | ENSP00000351811 |
| ENSP00000262803 | ENSP00000353741 |
| ENSP00000262803 | ENSP00000353804 |
| ENSP00000262803 | ENSP00000354125 |
| ENSP00000262803 | ENSP00000354499 |
| ENSP00000262803 | ENSP00000354554 |
| ENSP00000262803 | ENSP00000355261 |
| ENSP00000262803 | ENSP00000356146 |
| ENSP00000262803 | ENSP00000356448 |
| ENSP00000262803 | ENSP00000356811 |
| ENSP00000262803 | ENSP00000357459 |
| ENSP00000262803 | ENSP00000358064 |
| ENSP00000262803 | ENSP00000358140 |
| ENSP00000262803 | ENSP00000358799 |
| ENSP00000262803 | ENSP00000359518 |
| ENSP00000262803 | ENSP00000360455 |
| ENSP00000262803 | ENSP00000360532 |
| ENSP00000262803 | ENSP00000360922 |
| ENSP00000262803 | ENSP00000361076 |
| ENSP00000262803 | ENSP00000361433 |
| ENSP00000262803 | ENSP00000362900 |
| ENSP00000262803 | ENSP00000362936 |
| ENSP00000262803 | ENSP00000363021 |
| ENSP00000262803 | ENSP00000363329 |
| ENSP00000262803 | ENSP00000363676 |

|                 |                 |
|-----------------|-----------------|
| ENSP00000262803 | ENSP00000363745 |
| ENSP00000262803 | ENSP00000364119 |
| ENSP00000262803 | ENSP00000364289 |
| ENSP00000262803 | ENSP00000364895 |
| ENSP00000262803 | ENSP00000364912 |
| ENSP00000262803 | ENSP00000366135 |
| ENSP00000262803 | ENSP00000366607 |
| ENSP00000262803 | ENSP00000366974 |
| ENSP00000262803 | ENSP00000367835 |
| ENSP00000262803 | ENSP00000369042 |
| ENSP00000262803 | ENSP00000369335 |
| ENSP00000262803 | ENSP00000369757 |
| ENSP00000262803 | ENSP00000370150 |
| ENSP00000262803 | ENSP00000373715 |
| ENSP00000262803 | ENSP00000374390 |
| ENSP00000262803 | ENSP00000377496 |
| ENSP00000262803 | ENSP00000379282 |
| ENSP00000262803 | ENSP00000379607 |
| ENSP00000262803 | ENSP00000380414 |
| ENSP00000262803 | ENSP00000387911 |
| ENSP00000262803 | ENSP00000401371 |
| ENSP00000262803 | ENSP00000402515 |
| ENSP00000262803 | ENSP00000417229 |
| ENSP00000262803 | ENSP00000417686 |
| ENSP00000262812 | ENSP00000264027 |
| ENSP00000262812 | ENSP00000264028 |
| ENSP00000262812 | ENSP00000265070 |
| ENSP00000262812 | ENSP00000265175 |
| ENSP00000262812 | ENSP00000268719 |
| ENSP00000262812 | ENSP00000270176 |
| ENSP00000262812 | ENSP00000283351 |
| ENSP00000262812 | ENSP00000297185 |
| ENSP00000262812 | ENSP00000305459 |
| ENSP00000262812 | ENSP00000306124 |
| ENSP00000262812 | ENSP00000310521 |
| ENSP00000262812 | ENSP00000314615 |
| ENSP00000262812 | ENSP00000321239 |
| ENSP00000262812 | ENSP00000325002 |
| ENSP00000262812 | ENSP00000326921 |
| ENSP00000262812 | ENSP00000329419 |
| ENSP00000262812 | ENSP00000331201 |
| ENSP00000262812 | ENSP00000340019 |
| ENSP00000262812 | ENSP00000345530 |
| ENSP00000262812 | ENSP00000345656 |
| ENSP00000262812 | ENSP00000347498 |
| ENSP00000262812 | ENSP00000349887 |



|                 |                 |
|-----------------|-----------------|
| ENSP00000262812 | ENSP00000349970 |
| ENSP00000262812 | ENSP00000352738 |
| ENSP00000262812 | ENSP00000356405 |
| ENSP00000262812 | ENSP00000357048 |
| ENSP00000262812 | ENSP00000359552 |
| ENSP00000262812 | ENSP00000360798 |
| ENSP00000262812 | ENSP00000361686 |
| ENSP00000262812 | ENSP00000364188 |
| ENSP00000262812 | ENSP00000366974 |
| ENSP00000262812 | ENSP00000379228 |
| ENSP00000262812 | ENSP00000396704 |
| ENSP00000262812 | ENSP00000402240 |
| ENSP00000262843 | ENSP00000343129 |
| ENSP00000262843 | ENSP00000348784 |
| ENSP00000262843 | ENSP00000360116 |
| ENSP00000262843 | ENSP00000361276 |
| ENSP00000262843 | ENSP00000363095 |
| ENSP00000262843 | ENSP00000374455 |
| ENSP00000262844 | ENSP00000340019 |
| ENSP00000262844 | ENSP00000363559 |
| ENSP00000262850 | ENSP00000264276 |
| ENSP00000262850 | ENSP00000265537 |
| ENSP00000262850 | ENSP00000270776 |
| ENSP00000262850 | ENSP00000278616 |
| ENSP00000262850 | ENSP00000278671 |
| ENSP00000262850 | ENSP00000285046 |
| ENSP00000262850 | ENSP00000290429 |
| ENSP00000262850 | ENSP00000296137 |
| ENSP00000262850 | ENSP00000296328 |
| ENSP00000262850 | ENSP00000302478 |
| ENSP00000262850 | ENSP00000311430 |
| ENSP00000262850 | ENSP00000314949 |
| ENSP00000262850 | ENSP00000317955 |
| ENSP00000262850 | ENSP00000326534 |
| ENSP00000262850 | ENSP00000327821 |
| ENSP00000262850 | ENSP00000334061 |
| ENSP00000262850 | ENSP00000343657 |
| ENSP00000262850 | ENSP00000343701 |
| ENSP00000262850 | ENSP00000344446 |
| ENSP00000262850 | ENSP00000344456 |
| ENSP00000262850 | ENSP00000345144 |
| ENSP00000262850 | ENSP00000347733 |
| ENSP00000262850 | ENSP00000348577 |
| ENSP00000262850 | ENSP00000352121 |
| ENSP00000262850 | ENSP00000353393 |
| ENSP00000262850 | ENSP00000354558 |

|                 |                 |
|-----------------|-----------------|
| ENSP00000262850 | ENSP00000355205 |
| ENSP00000262850 | ENSP00000356548 |
| ENSP00000262850 | ENSP00000357288 |
| ENSP00000262850 | ENSP00000358423 |
| ENSP00000262850 | ENSP00000363162 |
| ENSP00000262850 | ENSP00000365811 |
| ENSP00000262850 | ENSP00000366135 |
| ENSP00000262850 | ENSP00000366843 |
| ENSP00000262850 | ENSP00000367079 |
| ENSP00000262850 | ENSP00000367766 |
| ENSP00000262850 | ENSP00000370517 |
| ENSP00000262850 | ENSP00000377954 |
| ENSP00000262850 | ENSP00000390158 |
| ENSP00000262850 | ENSP00000415203 |
| ENSP00000262854 | ENSP00000264028 |
| ENSP00000262854 | ENSP00000265717 |
| ENSP00000262854 | ENSP00000265990 |
| ENSP00000262854 | ENSP00000278616 |
| ENSP00000262854 | ENSP00000294119 |
| ENSP00000262854 | ENSP00000294507 |
| ENSP00000262854 | ENSP00000299767 |
| ENSP00000262854 | ENSP00000300648 |
| ENSP00000262854 | ENSP00000307684 |
| ENSP00000262854 | ENSP00000309031 |
| ENSP00000262854 | ENSP00000326119 |
| ENSP00000262854 | ENSP00000328940 |
| ENSP00000262854 | ENSP00000329466 |
| ENSP00000262854 | ENSP00000331817 |
| ENSP00000262854 | ENSP00000337839 |
| ENSP00000262854 | ENSP00000343535 |
| ENSP00000262854 | ENSP00000344683 |
| ENSP00000262854 | ENSP00000346067 |
| ENSP00000262854 | ENSP00000355153 |
| ENSP00000262854 | ENSP00000358022 |
| ENSP00000262854 | ENSP00000358854 |
| ENSP00000262854 | ENSP00000359837 |
| ENSP00000262854 | ENSP00000360286 |
| ENSP00000262854 | ENSP00000360532 |
| ENSP00000262854 | ENSP00000365891 |
| ENSP00000262854 | ENSP00000366135 |
| ENSP00000262854 | ENSP00000366179 |
| ENSP00000262854 | ENSP00000366974 |
| ENSP00000262854 | ENSP00000367208 |
| ENSP00000262854 | ENSP00000368438 |
| ENSP00000262854 | ENSP00000368565 |
| ENSP00000262854 | ENSP00000387170 |

|                 |                 |
|-----------------|-----------------|
| ENSP00000262878 | ENSP00000264093 |
| ENSP00000262878 | ENSP00000301764 |
| ENSP00000262878 | ENSP00000322706 |
| ENSP00000262878 | ENSP00000376445 |
| ENSP00000262878 | ENSP00000386722 |
| ENSP00000262879 | ENSP00000263642 |
| ENSP00000262890 | ENSP00000263925 |
| ENSP00000262890 | ENSP00000276603 |
| ENSP00000262890 | ENSP00000300086 |
| ENSP00000262890 | ENSP00000304102 |
| ENSP00000262890 | ENSP00000323687 |
| ENSP00000262890 | ENSP00000324491 |
| ENSP00000262890 | ENSP00000370410 |
| ENSP00000262890 | ENSP00000378306 |
| ENSP00000262895 | ENSP00000300417 |
| ENSP00000262895 | ENSP00000347206 |
| ENSP00000262895 | ENSP00000349892 |
| ENSP00000262901 | ENSP00000266058 |
| ENSP00000262901 | ENSP00000281043 |
| ENSP00000262901 | ENSP00000351407 |
| ENSP00000262901 | ENSP00000381840 |
| ENSP00000262903 | ENSP00000265990 |
| ENSP00000262903 | ENSP00000300648 |
| ENSP00000262903 | ENSP00000307684 |
| ENSP00000262903 | ENSP00000329411 |
| ENSP00000262903 | ENSP00000331817 |
| ENSP00000262903 | ENSP00000348010 |
| ENSP00000262903 | ENSP00000359837 |
| ENSP00000262903 | ENSP00000360286 |
| ENSP00000262903 | ENSP00000366135 |
| ENSP00000262903 | ENSP00000366179 |
| ENSP00000262903 | ENSP00000367208 |
| ENSP00000262903 | ENSP00000368565 |
| ENSP00000262903 | ENSP00000387170 |
| ENSP00000262904 | ENSP00000263384 |
| ENSP00000262904 | ENSP00000264161 |
| ENSP00000262904 | ENSP00000267064 |
| ENSP00000262904 | ENSP00000267101 |
| ENSP00000262904 | ENSP00000267163 |
| ENSP00000262904 | ENSP00000282050 |
| ENSP00000262904 | ENSP00000304668 |
| ENSP00000262904 | ENSP00000309555 |
| ENSP00000262904 | ENSP00000311005 |
| ENSP00000262904 | ENSP00000313059 |
| ENSP00000262904 | ENSP00000314129 |
| ENSP00000262904 | ENSP00000320485 |

|                 |                 |
|-----------------|-----------------|
| ENSP00000262904 | ENSP00000329357 |
| ENSP00000262904 | ENSP00000332995 |
| ENSP00000262904 | ENSP00000345681 |
| ENSP00000262904 | ENSP00000346227 |
| ENSP00000262904 | ENSP00000353344 |
| ENSP00000262904 | ENSP00000362208 |
| ENSP00000262904 | ENSP00000362592 |
| ENSP00000262904 | ENSP00000363827 |
| ENSP00000262904 | ENSP00000364912 |
| ENSP00000262904 | ENSP00000367079 |
| ENSP00000262904 | ENSP00000368438 |
| ENSP00000262904 | ENSP00000368686 |
| ENSP00000262904 | ENSP00000378529 |
| ENSP00000262904 | ENSP00000419494 |
| ENSP00000262919 | ENSP00000350512 |
| ENSP00000262919 | ENSP00000364092 |
| ENSP00000262947 | ENSP00000363559 |
| ENSP00000262962 | ENSP00000264233 |
| ENSP00000262962 | ENSP00000268206 |
| ENSP00000262962 | ENSP00000268482 |
| ENSP00000262962 | ENSP00000291688 |
| ENSP00000262962 | ENSP00000295488 |
| ENSP00000262962 | ENSP00000296805 |
| ENSP00000262962 | ENSP00000298532 |
| ENSP00000262962 | ENSP00000301740 |
| ENSP00000262962 | ENSP00000303191 |
| ENSP00000262962 | ENSP00000304350 |
| ENSP00000262962 | ENSP00000304370 |
| ENSP00000262962 | ENSP00000326806 |
| ENSP00000262962 | ENSP00000331907 |
| ENSP00000262962 | ENSP00000332103 |
| ENSP00000262962 | ENSP00000334148 |
| ENSP00000262962 | ENSP00000351137 |
| ENSP00000262962 | ENSP00000359454 |
| ENSP00000262962 | ENSP00000360532 |
| ENSP00000262962 | ENSP00000361577 |
| ENSP00000262962 | ENSP00000362166 |
| ENSP00000262962 | ENSP00000364212 |
| ENSP00000262962 | ENSP00000364289 |
| ENSP00000262962 | ENSP00000366557 |
| ENSP00000262962 | ENSP00000371888 |
| ENSP00000262962 | ENSP00000376973 |
| ENSP00000262962 | ENSP00000387006 |
| ENSP00000262962 | ENSP00000412566 |
| ENSP00000262962 | ENSP00000416583 |
| ENSP00000262966 | ENSP00000290541 |

|                 |                 |
|-----------------|-----------------|
| ENSP00000262966 | ENSP00000298852 |
| ENSP00000262966 | ENSP00000299206 |
| ENSP00000262966 | ENSP00000309198 |
| ENSP00000262966 | ENSP00000310129 |
| ENSP00000262966 | ENSP00000310590 |
| ENSP00000262966 | ENSP00000337501 |
| ENSP00000262966 | ENSP00000338703 |
| ENSP00000262966 | ENSP00000339095 |
| ENSP00000262966 | ENSP00000347997 |
| ENSP00000262966 | ENSP00000354673 |
| ENSP00000262966 | ENSP00000354883 |
| ENSP00000262966 | ENSP00000360216 |
| ENSP00000262966 | ENSP00000361699 |
| ENSP00000262966 | ENSP00000362334 |
| ENSP00000262966 | ENSP00000369531 |
| ENSP00000262966 | ENSP00000384211 |
| ENSP00000262966 | ENSP00000386212 |
| ENSP00000262966 | ENSP00000401508 |
| ENSP00000262966 | ENSP00000417748 |
| ENSP00000262982 | ENSP00000265351 |
| ENSP00000262982 | ENSP00000276326 |
| ENSP00000262982 | ENSP00000280346 |
| ENSP00000262982 | ENSP00000283195 |
| ENSP00000262982 | ENSP00000290158 |
| ENSP00000262982 | ENSP00000290649 |
| ENSP00000262982 | ENSP00000291688 |
| ENSP00000262982 | ENSP00000296273 |
| ENSP00000262982 | ENSP00000298910 |
| ENSP00000262982 | ENSP00000299601 |
| ENSP00000262982 | ENSP00000300574 |
| ENSP00000262982 | ENSP00000307939 |
| ENSP00000262982 | ENSP00000310129 |
| ENSP00000262982 | ENSP00000311505 |
| ENSP00000262982 | ENSP00000325448 |
| ENSP00000262982 | ENSP00000327213 |
| ENSP00000262982 | ENSP00000328103 |
| ENSP00000262982 | ENSP00000329029 |
| ENSP00000262982 | ENSP00000329466 |
| ENSP00000262982 | ENSP00000337405 |
| ENSP00000262982 | ENSP00000339881 |
| ENSP00000262982 | ENSP00000340823 |
| ENSP00000262982 | ENSP00000343701 |
| ENSP00000262982 | ENSP00000345656 |
| ENSP00000262982 | ENSP00000346453 |
| ENSP00000262982 | ENSP00000351682 |
| ENSP00000262982 | ENSP00000357748 |

|                 |                 |
|-----------------|-----------------|
| ENSP00000262982 | ENSP00000359531 |
| ENSP00000262982 | ENSP00000359688 |
| ENSP00000262982 | ENSP00000360473 |
| ENSP00000262982 | ENSP00000360532 |
| ENSP00000262982 | ENSP00000364289 |
| ENSP00000262982 | ENSP00000364320 |
| ENSP00000262982 | ENSP00000366135 |
| ENSP00000262982 | ENSP00000369042 |
| ENSP00000262982 | ENSP00000369335 |
| ENSP00000262982 | ENSP00000369411 |
| ENSP00000262982 | ENSP00000369757 |
| ENSP00000262982 | ENSP00000370151 |
| ENSP00000262982 | ENSP00000376973 |
| ENSP00000262982 | ENSP00000377280 |
| ENSP00000262982 | ENSP00000380460 |
| ENSP00000262982 | ENSP00000380982 |
| ENSP00000262982 | ENSP00000381863 |
| ENSP00000262990 | ENSP00000309606 |
| ENSP00000262990 | ENSP00000361010 |
| ENSP00000262995 | ENSP00000274376 |
| ENSP00000262995 | ENSP00000275635 |
| ENSP00000262995 | ENSP00000281171 |
| ENSP00000262995 | ENSP00000296474 |
| ENSP00000262995 | ENSP00000300574 |
| ENSP00000262995 | ENSP00000303554 |
| ENSP00000262995 | ENSP00000308774 |
| ENSP00000262995 | ENSP00000310561 |
| ENSP00000262995 | ENSP00000327077 |
| ENSP00000262995 | ENSP00000330408 |
| ENSP00000262995 | ENSP00000339186 |
| ENSP00000262995 | ENSP00000340944 |
| ENSP00000262995 | ENSP00000347942 |
| ENSP00000262995 | ENSP00000348081 |
| ENSP00000262995 | ENSP00000348307 |
| ENSP00000262995 | ENSP00000352121 |
| ENSP00000262995 | ENSP00000354927 |
| ENSP00000262995 | ENSP00000356346 |
| ENSP00000262995 | ENSP00000357494 |
| ENSP00000262995 | ENSP00000360916 |
| ENSP00000262995 | ENSP00000361202 |
| ENSP00000262995 | ENSP00000364893 |
| ENSP00000262995 | ENSP00000365016 |
| ENSP00000262995 | ENSP00000378368 |
| ENSP00000262995 | ENSP00000384675 |
| ENSP00000263026 | ENSP00000359206 |
| ENSP00000263026 | ENSP00000380184 |

|                 |                 |
|-----------------|-----------------|
| ENSP00000263036 | ENSP00000306245 |
| ENSP00000263036 | ENSP00000315112 |
| ENSP00000263036 | ENSP00000317891 |
| ENSP00000263036 | ENSP00000324573 |
| ENSP00000263036 | ENSP00000329411 |
| ENSP00000263036 | ENSP00000329967 |
| ENSP00000263036 | ENSP00000347184 |
| ENSP00000263036 | ENSP00000363089 |
| ENSP00000263036 | ENSP00000371875 |
| ENSP00000263036 | ENSP00000379612 |
| ENSP00000263036 | ENSP00000380019 |
| ENSP00000263036 | ENSP00000380054 |
| ENSP00000263036 | ENSP00000381698 |
| ENSP00000263036 | ENSP00000382423 |
| ENSP00000263036 | ENSP00000384391 |
| ENSP00000263038 | ENSP00000264108 |
| ENSP00000263038 | ENSP00000264169 |
| ENSP00000263038 | ENSP00000268717 |
| ENSP00000263038 | ENSP00000270708 |
| ENSP00000263038 | ENSP00000353393 |
| ENSP00000263038 | ENSP00000362987 |
| ENSP00000263038 | ENSP00000364578 |
| ENSP00000263043 | ENSP00000267803 |
| ENSP00000263043 | ENSP00000276014 |
| ENSP00000263043 | ENSP00000283195 |
| ENSP00000263043 | ENSP00000302114 |
| ENSP00000263043 | ENSP00000304169 |
| ENSP00000263043 | ENSP00000304226 |
| ENSP00000263043 | ENSP00000307272 |
| ENSP00000263043 | ENSP00000310701 |
| ENSP00000263043 | ENSP00000311083 |
| ENSP00000263043 | ENSP00000316845 |
| ENSP00000263043 | ENSP00000346809 |
| ENSP00000263043 | ENSP00000354927 |
| ENSP00000263043 | ENSP00000355866 |
| ENSP00000263043 | ENSP00000362110 |
| ENSP00000263043 | ENSP00000363021 |
| ENSP00000263043 | ENSP00000365005 |
| ENSP00000263043 | ENSP00000372023 |
| ENSP00000263043 | ENSP00000381932 |
| ENSP00000263043 | ENSP00000382423 |
| ENSP00000263043 | ENSP00000384675 |
| ENSP00000263043 | ENSP00000400591 |
| ENSP00000263056 | ENSP00000269122 |
| ENSP00000263056 | ENSP00000276416 |
| ENSP00000263056 | ENSP00000288976 |

|                 |                 |
|-----------------|-----------------|
| ENSP00000263056 | ENSP00000295025 |
| ENSP00000263056 | ENSP00000297185 |
| ENSP00000263056 | ENSP00000305958 |
| ENSP00000263056 | ENSP00000321203 |
| ENSP00000263056 | ENSP00000335357 |
| ENSP00000263056 | ENSP00000339952 |
| ENSP00000263056 | ENSP00000348602 |
| ENSP00000263056 | ENSP00000351113 |
| ENSP00000263056 | ENSP00000354916 |
| ENSP00000263056 | ENSP00000363708 |
| ENSP00000263056 | ENSP00000364893 |
| ENSP00000263062 | ENSP00000263360 |
| ENSP00000263062 | ENSP00000265354 |
| ENSP00000263062 | ENSP00000265990 |
| ENSP00000263062 | ENSP00000283290 |
| ENSP00000263062 | ENSP00000303315 |
| ENSP00000263062 | ENSP00000306983 |
| ENSP00000263062 | ENSP00000312697 |
| ENSP00000263062 | ENSP00000320566 |
| ENSP00000263062 | ENSP00000331310 |
| ENSP00000263062 | ENSP00000347733 |
| ENSP00000263062 | ENSP00000355205 |
| ENSP00000263062 | ENSP00000357887 |
| ENSP00000263062 | ENSP00000359518 |
| ENSP00000263062 | ENSP00000362166 |
| ENSP00000263062 | ENSP00000366974 |
| ENSP00000263062 | ENSP00000369695 |
| ENSP00000263062 | ENSP00000374213 |
| ENSP00000263073 | ENSP00000264951 |
| ENSP00000263073 | ENSP00000278616 |
| ENSP00000263073 | ENSP00000280665 |
| ENSP00000263073 | ENSP00000298746 |
| ENSP00000263073 | ENSP00000309572 |
| ENSP00000263073 | ENSP00000325863 |
| ENSP00000263073 | ENSP00000326806 |
| ENSP00000263073 | ENSP00000332103 |
| ENSP00000263073 | ENSP00000336842 |
| ENSP00000263073 | ENSP00000348708 |
| ENSP00000263073 | ENSP00000351284 |
| ENSP00000263073 | ENSP00000352257 |
| ENSP00000263073 | ENSP00000354673 |
| ENSP00000263073 | ENSP00000355261 |
| ENSP00000263073 | ENSP00000358563 |
| ENSP00000263073 | ENSP00000361577 |
| ENSP00000263073 | ENSP00000380504 |
| ENSP00000263073 | ENSP00000412566 |



|                 |                 |
|-----------------|-----------------|
| ENSP00000263083 | ENSP00000264731 |
| ENSP00000263083 | ENSP00000268206 |
| ENSP00000263083 | ENSP00000296805 |
| ENSP00000263083 | ENSP00000302955 |
| ENSP00000263083 | ENSP00000321320 |
| ENSP00000263083 | ENSP00000334564 |
| ENSP00000263083 | ENSP00000343885 |
| ENSP00000263083 | ENSP00000348877 |
| ENSP00000263083 | ENSP00000361465 |
| ENSP00000263083 | ENSP00000419599 |
| ENSP00000263092 | ENSP00000308546 |
| ENSP00000263102 | ENSP00000311344 |
| ENSP00000263102 | ENSP00000340271 |
| ENSP00000263102 | ENSP00000343535 |
| ENSP00000263116 | ENSP00000264027 |
| ENSP00000263116 | ENSP00000264501 |
| ENSP00000263116 | ENSP00000265960 |
| ENSP00000263116 | ENSP00000272322 |
| ENSP00000263116 | ENSP00000273398 |
| ENSP00000263116 | ENSP00000294179 |
| ENSP00000263116 | ENSP00000299138 |
| ENSP00000263116 | ENSP00000299601 |
| ENSP00000263116 | ENSP00000300584 |
| ENSP00000263116 | ENSP00000304593 |
| ENSP00000263116 | ENSP00000305459 |
| ENSP00000263116 | ENSP00000308496 |
| ENSP00000263116 | ENSP00000314615 |
| ENSP00000263116 | ENSP00000318604 |
| ENSP00000263116 | ENSP00000321711 |
| ENSP00000263116 | ENSP00000326534 |
| ENSP00000263116 | ENSP00000328079 |
| ENSP00000263116 | ENSP00000328524 |
| ENSP00000263116 | ENSP00000329419 |
| ENSP00000263116 | ENSP00000336724 |
| ENSP00000263116 | ENSP00000341551 |
| ENSP00000263116 | ENSP00000341662 |
| ENSP00000263116 | ENSP00000349959 |
| ENSP00000263116 | ENSP00000354158 |
| ENSP00000263116 | ENSP00000354486 |
| ENSP00000263116 | ENSP00000354522 |
| ENSP00000263116 | ENSP00000356405 |
| ENSP00000263116 | ENSP00000357887 |
| ENSP00000263116 | ENSP00000359518 |
| ENSP00000263116 | ENSP00000368959 |
| ENSP00000263116 | ENSP00000371888 |
| ENSP00000263116 | ENSP00000372697 |

|                 |                 |
|-----------------|-----------------|
| ENSP00000263116 | ENSP00000374213 |
| ENSP00000263116 | ENSP00000376871 |
| ENSP00000263116 | ENSP00000377769 |
| ENSP00000263116 | ENSP00000381293 |
| ENSP00000263116 | ENSP00000386918 |
| ENSP00000263116 | ENSP00000389399 |
| ENSP00000263116 | ENSP00000390783 |
| ENSP00000263116 | ENSP00000390831 |
| ENSP00000263116 | ENSP00000391197 |
| ENSP00000263116 | ENSP00000394071 |
| ENSP00000263116 | ENSP00000397441 |
| ENSP00000263116 | ENSP00000401435 |
| ENSP00000263116 | ENSP00000402240 |
| ENSP00000263116 | ENSP00000402515 |
| ENSP00000263116 | ENSP00000402935 |
| ENSP00000263116 | ENSP00000404016 |
| ENSP00000263116 | ENSP00000406988 |
| ENSP00000263116 | ENSP00000409952 |
| ENSP00000263116 | ENSP00000411197 |
| ENSP00000263119 | ENSP00000263208 |
| ENSP00000263119 | ENSP00000271555 |
| ENSP00000263119 | ENSP00000314949 |
| ENSP00000263119 | ENSP00000348602 |
| ENSP00000263119 | ENSP00000350199 |
| ENSP00000263119 | ENSP00000353622 |
| ENSP00000263119 | ENSP00000365877 |
| ENSP00000263119 | ENSP00000378306 |
| ENSP00000263119 | ENSP00000417281 |
| ENSP00000263121 | ENSP00000263208 |
| ENSP00000263121 | ENSP00000263736 |
| ENSP00000263121 | ENSP00000264834 |
| ENSP00000263121 | ENSP00000265354 |
| ENSP00000263121 | ENSP00000265990 |
| ENSP00000263121 | ENSP00000266126 |
| ENSP00000263121 | ENSP00000267064 |
| ENSP00000263121 | ENSP00000267163 |
| ENSP00000263121 | ENSP00000271555 |
| ENSP00000263121 | ENSP00000278412 |
| ENSP00000263121 | ENSP00000278616 |
| ENSP00000263121 | ENSP00000280190 |
| ENSP00000263121 | ENSP00000282388 |
| ENSP00000263121 | ENSP00000282892 |
| ENSP00000263121 | ENSP00000283109 |
| ENSP00000263121 | ENSP00000284957 |
| ENSP00000263121 | ENSP00000285021 |
| ENSP00000263121 | ENSP00000286317 |

|                 |                 |
|-----------------|-----------------|
| ENSP00000263121 | ENSP00000287878 |
| ENSP00000263121 | ENSP00000290663 |
| ENSP00000263121 | ENSP00000295321 |
| ENSP00000263121 | ENSP00000297325 |
| ENSP00000263121 | ENSP00000299601 |
| ENSP00000263121 | ENSP00000303315 |
| ENSP00000263121 | ENSP00000304292 |
| ENSP00000263121 | ENSP00000305422 |
| ENSP00000263121 | ENSP00000306245 |
| ENSP00000263121 | ENSP00000309433 |
| ENSP00000263121 | ENSP00000310649 |
| ENSP00000263121 | ENSP00000312778 |
| ENSP00000263121 | ENSP00000314949 |
| ENSP00000263121 | ENSP00000319104 |
| ENSP00000263121 | ENSP00000319169 |
| ENSP00000263121 | ENSP00000320485 |
| ENSP00000263121 | ENSP00000320566 |
| ENSP00000263121 | ENSP00000323720 |
| ENSP00000263121 | ENSP00000323967 |
| ENSP00000263121 | ENSP00000325369 |
| ENSP00000263121 | ENSP00000325677 |
| ENSP00000263121 | ENSP00000325690 |
| ENSP00000263121 | ENSP00000326806 |
| ENSP00000263121 | ENSP00000329357 |
| ENSP00000263121 | ENSP00000334130 |
| ENSP00000263121 | ENSP00000334280 |
| ENSP00000263121 | ENSP00000335044 |
| ENSP00000263121 | ENSP00000340409 |
| ENSP00000263121 | ENSP00000340836 |
| ENSP00000263121 | ENSP00000341243 |
| ENSP00000263121 | ENSP00000341805 |
| ENSP00000263121 | ENSP00000342434 |
| ENSP00000263121 | ENSP00000344537 |
| ENSP00000263121 | ENSP00000345702 |
| ENSP00000263121 | ENSP00000346566 |
| ENSP00000263121 | ENSP00000347168 |
| ENSP00000263121 | ENSP00000348234 |
| ENSP00000263121 | ENSP00000349213 |
| ENSP00000263121 | ENSP00000350283 |
| ENSP00000263121 | ENSP00000350767 |
| ENSP00000263121 | ENSP00000351284 |
| ENSP00000263121 | ENSP00000351596 |
| ENSP00000263121 | ENSP00000351947 |
| ENSP00000263121 | ENSP00000353344 |
| ENSP00000263121 | ENSP00000353622 |
| ENSP00000263121 | ENSP00000354723 |

|                 |                 |
|-----------------|-----------------|
| ENSP00000263121 | ENSP00000356263 |
| ENSP00000263121 | ENSP00000356405 |
| ENSP00000263121 | ENSP00000356846 |
| ENSP00000263121 | ENSP00000360532 |
| ENSP00000263121 | ENSP00000360621 |
| ENSP00000263121 | ENSP00000362592 |
| ENSP00000263121 | ENSP00000362948 |
| ENSP00000263121 | ENSP00000364929 |
| ENSP00000263121 | ENSP00000366974 |
| ENSP00000263121 | ENSP00000367034 |
| ENSP00000263121 | ENSP00000370003 |
| ENSP00000263121 | ENSP00000370408 |
| ENSP00000263121 | ENSP00000377665 |
| ENSP00000263121 | ENSP00000379607 |
| ENSP00000263121 | ENSP00000380718 |
| ENSP00000263121 | ENSP00000384015 |
| ENSP00000263121 | ENSP00000391774 |
| ENSP00000263121 | ENSP00000392028 |
| ENSP00000263121 | ENSP00000394869 |
| ENSP00000263121 | ENSP00000395535 |
| ENSP00000263121 | ENSP00000402240 |
| ENSP00000263121 | ENSP00000417281 |
| ENSP00000263121 | ENSP00000420588 |
| ENSP00000263150 | ENSP00000291688 |
| ENSP00000263150 | ENSP00000295025 |
| ENSP00000263150 | ENSP00000316454 |
| ENSP00000263150 | ENSP00000341957 |
| ENSP00000263150 | ENSP00000381031 |
| ENSP00000263174 | ENSP00000380921 |
| ENSP00000263181 | ENSP00000263710 |
| ENSP00000263181 | ENSP00000265104 |
| ENSP00000263181 | ENSP00000271452 |
| ENSP00000263181 | ENSP00000286428 |
| ENSP00000263181 | ENSP00000287598 |
| ENSP00000263181 | ENSP00000296509 |
| ENSP00000263181 | ENSP00000300231 |
| ENSP00000263181 | ENSP00000300249 |
| ENSP00000263181 | ENSP00000301019 |
| ENSP00000263181 | ENSP00000301332 |
| ENSP00000263181 | ENSP00000302530 |
| ENSP00000263181 | ENSP00000322180 |
| ENSP00000263181 | ENSP00000327009 |
| ENSP00000263181 | ENSP00000332592 |
| ENSP00000263181 | ENSP00000346566 |
| ENSP00000263181 | ENSP00000347719 |
| ENSP00000263181 | ENSP00000348965 |

|                 |                 |
|-----------------|-----------------|
| ENSP00000263181 | ENSP00000351665 |
| ENSP00000263181 | ENSP00000353793 |
| ENSP00000263181 | ENSP00000354158 |
| ENSP00000263181 | ENSP00000355922 |
| ENSP00000263181 | ENSP00000356579 |
| ENSP00000263181 | ENSP00000357643 |
| ENSP00000263181 | ENSP00000360473 |
| ENSP00000263181 | ENSP00000363734 |
| ENSP00000263181 | ENSP00000368976 |
| ENSP00000263181 | ENSP00000372023 |
| ENSP00000263181 | ENSP00000372694 |
| ENSP00000263181 | ENSP00000378529 |
| ENSP00000263181 | ENSP00000382562 |
| ENSP00000263181 | ENSP00000402084 |
| ENSP00000263181 | ENSP00000412319 |
| ENSP00000263181 | ENSP00000414402 |
| ENSP00000263181 | ENSP00000415678 |
| ENSP00000263187 | ENSP00000263642 |
| ENSP00000263187 | ENSP00000263795 |
| ENSP00000263187 | ENSP00000264233 |
| ENSP00000263187 | ENSP00000265304 |
| ENSP00000263187 | ENSP00000267430 |
| ENSP00000263187 | ENSP00000285021 |
| ENSP00000263187 | ENSP00000286428 |
| ENSP00000263187 | ENSP00000306561 |
| ENSP00000263187 | ENSP00000307853 |
| ENSP00000263187 | ENSP00000310520 |
| ENSP00000263187 | ENSP00000311873 |
| ENSP00000263187 | ENSP00000321636 |
| ENSP00000263187 | ENSP00000322570 |
| ENSP00000263187 | ENSP00000348020 |
| ENSP00000263187 | ENSP00000351284 |
| ENSP00000263187 | ENSP00000351697 |
| ENSP00000263187 | ENSP00000353332 |
| ENSP00000263187 | ENSP00000354522 |
| ENSP00000263187 | ENSP00000360268 |
| ENSP00000263187 | ENSP00000360310 |
| ENSP00000263187 | ENSP00000361310 |
| ENSP00000263187 | ENSP00000363021 |
| ENSP00000263187 | ENSP00000364289 |
| ENSP00000263187 | ENSP00000368349 |
| ENSP00000263187 | ENSP00000368438 |
| ENSP00000263187 | ENSP00000369335 |
| ENSP00000263187 | ENSP00000389709 |
| ENSP00000263187 | ENSP00000397830 |
| ENSP00000263196 | ENSP00000300574 |

|                 |                 |
|-----------------|-----------------|
| ENSP00000263196 | ENSP00000340671 |
| ENSP00000263201 | ENSP00000263208 |
| ENSP00000263201 | ENSP00000263857 |
| ENSP00000263201 | ENSP00000264108 |
| ENSP00000263201 | ENSP00000264233 |
| ENSP00000263201 | ENSP00000265056 |
| ENSP00000263201 | ENSP00000265354 |
| ENSP00000263201 | ENSP00000265728 |
| ENSP00000263201 | ENSP00000267197 |
| ENSP00000263201 | ENSP00000268043 |
| ENSP00000263201 | ENSP00000276533 |
| ENSP00000263201 | ENSP00000278616 |
| ENSP00000263201 | ENSP00000281708 |
| ENSP00000263201 | ENSP00000295897 |
| ENSP00000263201 | ENSP00000296273 |
| ENSP00000263201 | ENSP00000296328 |
| ENSP00000263201 | ENSP00000296509 |
| ENSP00000263201 | ENSP00000297431 |
| ENSP00000263201 | ENSP00000300738 |
| ENSP00000263201 | ENSP00000310596 |
| ENSP00000263201 | ENSP00000313171 |
| ENSP00000263201 | ENSP00000313420 |
| ENSP00000263201 | ENSP00000314949 |
| ENSP00000263201 | ENSP00000317039 |
| ENSP00000263201 | ENSP00000321636 |
| ENSP00000263201 | ENSP00000322180 |
| ENSP00000263201 | ENSP00000323663 |
| ENSP00000263201 | ENSP00000334061 |
| ENSP00000263201 | ENSP00000336606 |
| ENSP00000263201 | ENSP00000340019 |
| ENSP00000263201 | ENSP00000340879 |
| ENSP00000263201 | ENSP00000343392 |
| ENSP00000263201 | ENSP00000343701 |
| ENSP00000263201 | ENSP00000343741 |
| ENSP00000263201 | ENSP00000351284 |
| ENSP00000263201 | ENSP00000352121 |
| ENSP00000263201 | ENSP00000353622 |
| ENSP00000263201 | ENSP00000353793 |
| ENSP00000263201 | ENSP00000354522 |
| ENSP00000263201 | ENSP00000354558 |
| ENSP00000263201 | ENSP00000355153 |
| ENSP00000263201 | ENSP00000360621 |
| ENSP00000263201 | ENSP00000365811 |
| ENSP00000263201 | ENSP00000365877 |
| ENSP00000263201 | ENSP00000366974 |
| ENSP00000263201 | ENSP00000368349 |

|                 |                 |
|-----------------|-----------------|
| ENSP00000263201 | ENSP00000369411 |
| ENSP00000263201 | ENSP00000370151 |
| ENSP00000263201 | ENSP00000371475 |
| ENSP00000263201 | ENSP00000372023 |
| ENSP00000263201 | ENSP00000380504 |
| ENSP00000263201 | ENSP00000382562 |
| ENSP00000263201 | ENSP00000384109 |
| ENSP00000263201 | ENSP00000397435 |
| ENSP00000263201 | ENSP00000401018 |
| ENSP00000263201 | ENSP00000402515 |
| ENSP00000263202 | ENSP00000263966 |
| ENSP00000263202 | ENSP00000264864 |
| ENSP00000263202 | ENSP00000270225 |
| ENSP00000263202 | ENSP00000273067 |
| ENSP00000263202 | ENSP00000274140 |
| ENSP00000263202 | ENSP00000274255 |
| ENSP00000263202 | ENSP00000276416 |
| ENSP00000263202 | ENSP00000287936 |
| ENSP00000263202 | ENSP00000290649 |
| ENSP00000263202 | ENSP00000290810 |
| ENSP00000263202 | ENSP00000294119 |
| ENSP00000263202 | ENSP00000296273 |
| ENSP00000263202 | ENSP00000296328 |
| ENSP00000263202 | ENSP00000296509 |
| ENSP00000263202 | ENSP00000299045 |
| ENSP00000263202 | ENSP00000300249 |
| ENSP00000263202 | ENSP00000302176 |
| ENSP00000263202 | ENSP00000305810 |
| ENSP00000263202 | ENSP00000309031 |
| ENSP00000263202 | ENSP00000309141 |
| ENSP00000263202 | ENSP00000310129 |
| ENSP00000263202 | ENSP00000311496 |
| ENSP00000263202 | ENSP00000313171 |
| ENSP00000263202 | ENSP00000314004 |
| ENSP00000263202 | ENSP00000317087 |
| ENSP00000263202 | ENSP00000321617 |
| ENSP00000263202 | ENSP00000325919 |
| ENSP00000263202 | ENSP00000326813 |
| ENSP00000263202 | ENSP00000330343 |
| ENSP00000263202 | ENSP00000331487 |
| ENSP00000263202 | ENSP00000338413 |
| ENSP00000263202 | ENSP00000343001 |
| ENSP00000263202 | ENSP00000346130 |
| ENSP00000263202 | ENSP00000348602 |
| ENSP00000263202 | ENSP00000350512 |
| ENSP00000263202 | ENSP00000360286 |

|                 |                 |
|-----------------|-----------------|
| ENSP00000263202 | ENSP00000364240 |
| ENSP00000263202 | ENSP00000366395 |
| ENSP00000263202 | ENSP00000366843 |
| ENSP00000263202 | ENSP00000370222 |
| ENSP00000263202 | ENSP00000379457 |
| ENSP00000263202 | ENSP00000380460 |
| ENSP00000263202 | ENSP00000381282 |
| ENSP00000263202 | ENSP00000390783 |
| ENSP00000263205 | ENSP00000263377 |
| ENSP00000263205 | ENSP00000263390 |
| ENSP00000263205 | ENSP00000264160 |
| ENSP00000263205 | ENSP00000265350 |
| ENSP00000263205 | ENSP00000267064 |
| ENSP00000263205 | ENSP00000268711 |
| ENSP00000263205 | ENSP00000282007 |
| ENSP00000263205 | ENSP00000286317 |
| ENSP00000263205 | ENSP00000290663 |
| ENSP00000263205 | ENSP00000292035 |
| ENSP00000263205 | ENSP00000293777 |
| ENSP00000263205 | ENSP00000297347 |
| ENSP00000263205 | ENSP00000299543 |
| ENSP00000263205 | ENSP00000300651 |
| ENSP00000263205 | ENSP00000323720 |
| ENSP00000263205 | ENSP00000325612 |
| ENSP00000263205 | ENSP00000326767 |
| ENSP00000263205 | ENSP00000337340 |
| ENSP00000263205 | ENSP00000341551 |
| ENSP00000263205 | ENSP00000347733 |
| ENSP00000263205 | ENSP00000348069 |
| ENSP00000263205 | ENSP00000354951 |
| ENSP00000263205 | ENSP00000357047 |
| ENSP00000263205 | ENSP00000357907 |
| ENSP00000263205 | ENSP00000360371 |
| ENSP00000263205 | ENSP00000362948 |
| ENSP00000263205 | ENSP00000363193 |
| ENSP00000263205 | ENSP00000365588 |
| ENSP00000263205 | ENSP00000373060 |
| ENSP00000263205 | ENSP00000384048 |
| ENSP00000263205 | ENSP00000387429 |
| ENSP00000263205 | ENSP00000391774 |
| ENSP00000263205 | ENSP00000392617 |
| ENSP00000263205 | ENSP00000396484 |
| ENSP00000263205 | ENSP00000404318 |
| ENSP00000263205 | ENSP00000409167 |
| ENSP00000263205 | ENSP00000415212 |
| ENSP00000263205 | ENSP00000416511 |



|                 |                 |
|-----------------|-----------------|
| ENSP00000263205 | ENSP00000418734 |
| ENSP00000263208 | ENSP00000263956 |
| ENSP00000263208 | ENSP00000264515 |
| ENSP00000263208 | ENSP00000264705 |
| ENSP00000263208 | ENSP00000265372 |
| ENSP00000263208 | ENSP00000265990 |
| ENSP00000263208 | ENSP00000267064 |
| ENSP00000263208 | ENSP00000269127 |
| ENSP00000263208 | ENSP00000271555 |
| ENSP00000263208 | ENSP00000278412 |
| ENSP00000263208 | ENSP00000279392 |
| ENSP00000263208 | ENSP00000282541 |
| ENSP00000263208 | ENSP00000283928 |
| ENSP00000263208 | ENSP00000287239 |
| ENSP00000263208 | ENSP00000291688 |
| ENSP00000263208 | ENSP00000296577 |
| ENSP00000263208 | ENSP00000296786 |
| ENSP00000263208 | ENSP00000298852 |
| ENSP00000263208 | ENSP00000299601 |
| ENSP00000263208 | ENSP00000299767 |
| ENSP00000263208 | ENSP00000302160 |
| ENSP00000263208 | ENSP00000309871 |
| ENSP00000263208 | ENSP00000310129 |
| ENSP00000263208 | ENSP00000310596 |
| ENSP00000263208 | ENSP00000310649 |
| ENSP00000263208 | ENSP00000311977 |
| ENSP00000263208 | ENSP00000314949 |
| ENSP00000263208 | ENSP00000315700 |
| ENSP00000263208 | ENSP00000317334 |
| ENSP00000263208 | ENSP00000319170 |
| ENSP00000263208 | ENSP00000321810 |
| ENSP00000263208 | ENSP00000322180 |
| ENSP00000263208 | ENSP00000322242 |
| ENSP00000263208 | ENSP00000328720 |
| ENSP00000263208 | ENSP00000329933 |
| ENSP00000263208 | ENSP00000331310 |
| ENSP00000263208 | ENSP00000336842 |
| ENSP00000263208 | ENSP00000338093 |
| ENSP00000263208 | ENSP00000341243 |
| ENSP00000263208 | ENSP00000342434 |
| ENSP00000263208 | ENSP00000344741 |
| ENSP00000263208 | ENSP00000346566 |
| ENSP00000263208 | ENSP00000348577 |
| ENSP00000263208 | ENSP00000353458 |
| ENSP00000263208 | ENSP00000353622 |
| ENSP00000263208 | ENSP00000353998 |

|                 |                 |
|-----------------|-----------------|
| ENSP00000263208 | ENSP00000354522 |
| ENSP00000263208 | ENSP00000355205 |
| ENSP00000263208 | ENSP00000355884 |
| ENSP00000263208 | ENSP00000355890 |
| ENSP00000263208 | ENSP00000356405 |
| ENSP00000263208 | ENSP00000356448 |
| ENSP00000263208 | ENSP00000357907 |
| ENSP00000263208 | ENSP00000360532 |
| ENSP00000263208 | ENSP00000361699 |
| ENSP00000263208 | ENSP00000362413 |
| ENSP00000263208 | ENSP00000362592 |
| ENSP00000263208 | ENSP00000362688 |
| ENSP00000263208 | ENSP00000364524 |
| ENSP00000263208 | ENSP00000365837 |
| ENSP00000263208 | ENSP00000366672 |
| ENSP00000263208 | ENSP00000366953 |
| ENSP00000263208 | ENSP00000366974 |
| ENSP00000263208 | ENSP00000368438 |
| ENSP00000263208 | ENSP00000369075 |
| ENSP00000263208 | ENSP00000369716 |
| ENSP00000263208 | ENSP00000370741 |
| ENSP00000263208 | ENSP00000371236 |
| ENSP00000263208 | ENSP00000374213 |
| ENSP00000263208 | ENSP00000376534 |
| ENSP00000263208 | ENSP00000376946 |
| ENSP00000263208 | ENSP00000377747 |
| ENSP00000263208 | ENSP00000379217 |
| ENSP00000263208 | ENSP00000380460 |
| ENSP00000263208 | ENSP00000380504 |
| ENSP00000263208 | ENSP00000386759 |
| ENSP00000263208 | ENSP00000387219 |
| ENSP00000263208 | ENSP00000387982 |
| ENSP00000263208 | ENSP00000388872 |
| ENSP00000263208 | ENSP00000392028 |
| ENSP00000263208 | ENSP00000393393 |
| ENSP00000263208 | ENSP00000402084 |
| ENSP00000263208 | ENSP00000418734 |
| ENSP00000263208 | ENSP00000420714 |
| ENSP00000263209 | ENSP00000314491 |
| ENSP00000263209 | ENSP00000318195 |
| ENSP00000263209 | ENSP00000339845 |
| ENSP00000263209 | ENSP00000356520 |
| ENSP00000263209 | ENSP00000363745 |
| ENSP00000263209 | ENSP00000404121 |
| ENSP00000263228 | ENSP00000263274 |
| ENSP00000263228 | ENSP00000263702 |

|                 |                 |
|-----------------|-----------------|
| ENSP00000263228 | ENSP00000263966 |
| ENSP00000263228 | ENSP00000264380 |
| ENSP00000263228 | ENSP00000265070 |
| ENSP00000263228 | ENSP00000265465 |
| ENSP00000263228 | ENSP00000274289 |
| ENSP00000263228 | ENSP00000276014 |
| ENSP00000263228 | ENSP00000281708 |
| ENSP00000263228 | ENSP00000290810 |
| ENSP00000263228 | ENSP00000295030 |
| ENSP00000263228 | ENSP00000296161 |
| ENSP00000263228 | ENSP00000300648 |
| ENSP00000263228 | ENSP00000303315 |
| ENSP00000263228 | ENSP00000306906 |
| ENSP00000263228 | ENSP00000310521 |
| ENSP00000263228 | ENSP00000313034 |
| ENSP00000263228 | ENSP00000325863 |
| ENSP00000263228 | ENSP00000333946 |
| ENSP00000263228 | ENSP00000334188 |
| ENSP00000263228 | ENSP00000336606 |
| ENSP00000263228 | ENSP00000337701 |
| ENSP00000263228 | ENSP00000338967 |
| ENSP00000263228 | ENSP00000345530 |
| ENSP00000263228 | ENSP00000350512 |
| ENSP00000263228 | ENSP00000354972 |
| ENSP00000263228 | ENSP00000355028 |
| ENSP00000263228 | ENSP00000356807 |
| ENSP00000263228 | ENSP00000359206 |
| ENSP00000263228 | ENSP00000360149 |
| ENSP00000263228 | ENSP00000361310 |
| ENSP00000263228 | ENSP00000367299 |
| ENSP00000263228 | ENSP00000368959 |
| ENSP00000263228 | ENSP00000376410 |
| ENSP00000263228 | ENSP00000379228 |
| ENSP00000263228 | ENSP00000388320 |
| ENSP00000263228 | ENSP00000402084 |
| ENSP00000263233 | ENSP00000278379 |
| ENSP00000263233 | ENSP00000284240 |
| ENSP00000263233 | ENSP00000293441 |
| ENSP00000263233 | ENSP00000322457 |
| ENSP00000263233 | ENSP00000346550 |
| ENSP00000263233 | ENSP00000377148 |
| ENSP00000263233 | ENSP00000380921 |
| ENSP00000263233 | ENSP00000382177 |
| ENSP00000263246 | ENSP00000276603 |
| ENSP00000263246 | ENSP00000290332 |
| ENSP00000263246 | ENSP00000295987 |

|                 |                 |
|-----------------|-----------------|
| ENSP00000263246 | ENSP00000300086 |
| ENSP00000263246 | ENSP00000306477 |
| ENSP00000263246 | ENSP00000307900 |
| ENSP00000263246 | ENSP00000312664 |
| ENSP00000263246 | ENSP00000313829 |
| ENSP00000263246 | ENSP00000330484 |
| ENSP00000263246 | ENSP00000340019 |
| ENSP00000263246 | ENSP00000343248 |
| ENSP00000263246 | ENSP00000347548 |
| ENSP00000263246 | ENSP00000350249 |
| ENSP00000263246 | ENSP00000350297 |
| ENSP00000263246 | ENSP00000352706 |
| ENSP00000263246 | ENSP00000352802 |
| ENSP00000263246 | ENSP00000356694 |
| ENSP00000263246 | ENSP00000359096 |
| ENSP00000263246 | ENSP00000359100 |
| ENSP00000263246 | ENSP00000359691 |
| ENSP00000263246 | ENSP00000365891 |
| ENSP00000263246 | ENSP00000368439 |
| ENSP00000263246 | ENSP00000369897 |
| ENSP00000263246 | ENSP00000390948 |
| ENSP00000263256 | ENSP00000386134 |
| ENSP00000263265 | ENSP00000286835 |
| ENSP00000263265 | ENSP00000315859 |
| ENSP00000263265 | ENSP00000325863 |
| ENSP00000263265 | ENSP00000341382 |
| ENSP00000263265 | ENSP00000348215 |
| ENSP00000263265 | ENSP00000352257 |
| ENSP00000263265 | ENSP00000356146 |
| ENSP00000263265 | ENSP00000358902 |
| ENSP00000263265 | ENSP00000380450 |
| ENSP00000263274 | ENSP00000267430 |
| ENSP00000263274 | ENSP00000268043 |
| ENSP00000263274 | ENSP00000282516 |
| ENSP00000263274 | ENSP00000285021 |
| ENSP00000263274 | ENSP00000296273 |
| ENSP00000263274 | ENSP00000298139 |
| ENSP00000263274 | ENSP00000299206 |
| ENSP00000263274 | ENSP00000299601 |
| ENSP00000263274 | ENSP00000307853 |
| ENSP00000263274 | ENSP00000308944 |
| ENSP00000263274 | ENSP00000310520 |
| ENSP00000263274 | ENSP00000311873 |
| ENSP00000263274 | ENSP00000313171 |
| ENSP00000263274 | ENSP00000315700 |
| ENSP00000263274 | ENSP00000317636 |

|                 |                 |
|-----------------|-----------------|
| ENSP00000263274 | ENSP00000318977 |
| ENSP00000263274 | ENSP00000322570 |
| ENSP00000263274 | ENSP00000325423 |
| ENSP00000263274 | ENSP00000325863 |
| ENSP00000263274 | ENSP00000340879 |
| ENSP00000263274 | ENSP00000343741 |
| ENSP00000263274 | ENSP00000347232 |
| ENSP00000263274 | ENSP00000347978 |
| ENSP00000263274 | ENSP00000351284 |
| ENSP00000263274 | ENSP00000351697 |
| ENSP00000263274 | ENSP00000360216 |
| ENSP00000263274 | ENSP00000364929 |
| ENSP00000263274 | ENSP00000368349 |
| ENSP00000263274 | ENSP00000368438 |
| ENSP00000263274 | ENSP00000369411 |
| ENSP00000263274 | ENSP00000370151 |
| ENSP00000263274 | ENSP00000371475 |
| ENSP00000263274 | ENSP00000372023 |
| ENSP00000263274 | ENSP00000402515 |
| ENSP00000263277 | ENSP00000269122 |
| ENSP00000263277 | ENSP00000323377 |
| ENSP00000263277 | ENSP00000340693 |
| ENSP00000263277 | ENSP00000342032 |
| ENSP00000263277 | ENSP00000347169 |
| ENSP00000263277 | ENSP00000349465 |
| ENSP00000263277 | ENSP00000376268 |
| ENSP00000263277 | ENSP00000414920 |
| ENSP00000263278 | ENSP00000340671 |
| ENSP00000263339 | ENSP00000275015 |
| ENSP00000263339 | ENSP00000329002 |
| ENSP00000263339 | ENSP00000330959 |
| ENSP00000263339 | ENSP00000381698 |
| ENSP00000263341 | ENSP00000329357 |
| ENSP00000263341 | ENSP00000330959 |
| ENSP00000263346 | ENSP00000361010 |
| ENSP00000263360 | ENSP00000264709 |
| ENSP00000263360 | ENSP00000264926 |
| ENSP00000263360 | ENSP00000267163 |
| ENSP00000263360 | ENSP00000269122 |
| ENSP00000263360 | ENSP00000269197 |
| ENSP00000263360 | ENSP00000294339 |
| ENSP00000263360 | ENSP00000295901 |
| ENSP00000263360 | ENSP00000300291 |
| ENSP00000263360 | ENSP00000301764 |
| ENSP00000263360 | ENSP00000310040 |
| ENSP00000263360 | ENSP00000310129 |

|                 |                 |
|-----------------|-----------------|
| ENSP00000263360 | ENSP00000311677 |
| ENSP00000263360 | ENSP00000314080 |
| ENSP00000263360 | ENSP00000316578 |
| ENSP00000263360 | ENSP00000317790 |
| ENSP00000263360 | ENSP00000319169 |
| ENSP00000263360 | ENSP00000332995 |
| ENSP00000263360 | ENSP00000338727 |
| ENSP00000263360 | ENSP00000340820 |
| ENSP00000263360 | ENSP00000341280 |
| ENSP00000263360 | ENSP00000343535 |
| ENSP00000263360 | ENSP00000352516 |
| ENSP00000263360 | ENSP00000353375 |
| ENSP00000263360 | ENSP00000353508 |
| ENSP00000263360 | ENSP00000354995 |
| ENSP00000263360 | ENSP00000358862 |
| ENSP00000263360 | ENSP00000359321 |
| ENSP00000263360 | ENSP00000361076 |
| ENSP00000263360 | ENSP00000361824 |
| ENSP00000263360 | ENSP00000362413 |
| ENSP00000263360 | ENSP00000362592 |
| ENSP00000263360 | ENSP00000364119 |
| ENSP00000263360 | ENSP00000364839 |
| ENSP00000263360 | ENSP00000366557 |
| ENSP00000263360 | ENSP00000369411 |
| ENSP00000263360 | ENSP00000370968 |
| ENSP00000263360 | ENSP00000375857 |
| ENSP00000263360 | ENSP00000376204 |
| ENSP00000263360 | ENSP00000381840 |
| ENSP00000263360 | ENSP00000382688 |
| ENSP00000263360 | ENSP00000383333 |
| ENSP00000263360 | ENSP00000387006 |
| ENSP00000263360 | ENSP00000404658 |
| ENSP00000263360 | ENSP00000417980 |
| ENSP00000263368 | ENSP00000386717 |
| ENSP00000263377 | ENSP00000264157 |
| ENSP00000263377 | ENSP00000264335 |
| ENSP00000263377 | ENSP00000276072 |
| ENSP00000263377 | ENSP00000283882 |
| ENSP00000263377 | ENSP00000295321 |
| ENSP00000263377 | ENSP00000296273 |
| ENSP00000263377 | ENSP00000296702 |
| ENSP00000263377 | ENSP00000297338 |
| ENSP00000263377 | ENSP00000300574 |
| ENSP00000263377 | ENSP00000300651 |
| ENSP00000263377 | ENSP00000305689 |
| ENSP00000263377 | ENSP00000312697 |

|                 |                 |
|-----------------|-----------------|
| ENSP00000263377 | ENSP00000313171 |
| ENSP00000263377 | ENSP00000319104 |
| ENSP00000263377 | ENSP00000323720 |
| ENSP00000263377 | ENSP00000328773 |
| ENSP00000263377 | ENSP00000329933 |
| ENSP00000263377 | ENSP00000340896 |
| ENSP00000263377 | ENSP00000348610 |
| ENSP00000263377 | ENSP00000350767 |
| ENSP00000263377 | ENSP00000351284 |
| ENSP00000263377 | ENSP00000354522 |
| ENSP00000263377 | ENSP00000354673 |
| ENSP00000263377 | ENSP00000355205 |
| ENSP00000263377 | ENSP00000360532 |
| ENSP00000263377 | ENSP00000361998 |
| ENSP00000263377 | ENSP00000363193 |
| ENSP00000263377 | ENSP00000366974 |
| ENSP00000263377 | ENSP00000369411 |
| ENSP00000263377 | ENSP00000374213 |
| ENSP00000263377 | ENSP00000379946 |
| ENSP00000263377 | ENSP00000394085 |
| ENSP00000263379 | ENSP00000349365 |
| ENSP00000263381 | ENSP00000311825 |
| ENSP00000263381 | ENSP00000351947 |
| ENSP00000263381 | ENSP00000380718 |
| ENSP00000263381 | ENSP00000417281 |
| ENSP00000263381 | ENSP00000417980 |
| ENSP00000263383 | ENSP00000322991 |
| ENSP00000263383 | ENSP00000339435 |
| ENSP00000263383 | ENSP00000352257 |
| ENSP00000263383 | ENSP00000353073 |
| ENSP00000263384 | ENSP00000276014 |
| ENSP00000263384 | ENSP00000387006 |
| ENSP00000263390 | ENSP00000264157 |
| ENSP00000263390 | ENSP00000264515 |
| ENSP00000263390 | ENSP00000265073 |
| ENSP00000263390 | ENSP00000265343 |
| ENSP00000263390 | ENSP00000265350 |
| ENSP00000263390 | ENSP00000266732 |
| ENSP00000263390 | ENSP00000268711 |
| ENSP00000263390 | ENSP00000272645 |
| ENSP00000263390 | ENSP00000276072 |
| ENSP00000263390 | ENSP00000281928 |
| ENSP00000263390 | ENSP00000282007 |
| ENSP00000263390 | ENSP00000282892 |
| ENSP00000263390 | ENSP00000283882 |
| ENSP00000263390 | ENSP00000286317 |

|                 |                 |
|-----------------|-----------------|
| ENSP00000263390 | ENSP00000290663 |
| ENSP00000263390 | ENSP00000292035 |
| ENSP00000263390 | ENSP00000293371 |
| ENSP00000263390 | ENSP00000293777 |
| ENSP00000263390 | ENSP00000295066 |
| ENSP00000263390 | ENSP00000295685 |
| ENSP00000263390 | ENSP00000296388 |
| ENSP00000263390 | ENSP00000296564 |
| ENSP00000263390 | ENSP00000297347 |
| ENSP00000263390 | ENSP00000299424 |
| ENSP00000263390 | ENSP00000299543 |
| ENSP00000263390 | ENSP00000300651 |
| ENSP00000263390 | ENSP00000301788 |
| ENSP00000263390 | ENSP00000302160 |
| ENSP00000263390 | ENSP00000304593 |
| ENSP00000263390 | ENSP00000305422 |
| ENSP00000263390 | ENSP00000305689 |
| ENSP00000263390 | ENSP00000312735 |
| ENSP00000263390 | ENSP00000314949 |
| ENSP00000263390 | ENSP00000317636 |
| ENSP00000263390 | ENSP00000320346 |
| ENSP00000263390 | ENSP00000323720 |
| ENSP00000263390 | ENSP00000324124 |
| ENSP00000263390 | ENSP00000325376 |
| ENSP00000263390 | ENSP00000325612 |
| ENSP00000263390 | ENSP00000325677 |
| ENSP00000263390 | ENSP00000326767 |
| ENSP00000263390 | ENSP00000334188 |
| ENSP00000263390 | ENSP00000337340 |
| ENSP00000263390 | ENSP00000340271 |
| ENSP00000263390 | ENSP00000342343 |
| ENSP00000263390 | ENSP00000342889 |
| ENSP00000263390 | ENSP00000343745 |
| ENSP00000263390 | ENSP00000344537 |
| ENSP00000263390 | ENSP00000347733 |
| ENSP00000263390 | ENSP00000348069 |
| ENSP00000263390 | ENSP00000348610 |
| ENSP00000263390 | ENSP00000354633 |
| ENSP00000263390 | ENSP00000354681 |
| ENSP00000263390 | ENSP00000354951 |
| ENSP00000263390 | ENSP00000354977 |
| ENSP00000263390 | ENSP00000355051 |
| ENSP00000263390 | ENSP00000357047 |
| ENSP00000263390 | ENSP00000357887 |
| ENSP00000263390 | ENSP00000357907 |
| ENSP00000263390 | ENSP00000358854 |



|                 |                 |
|-----------------|-----------------|
| ENSP00000263390 | ENSP00000360116 |
| ENSP00000263390 | ENSP00000360519 |
| ENSP00000263390 | ENSP00000362068 |
| ENSP00000263390 | ENSP00000362948 |
| ENSP00000263390 | ENSP00000363193 |
| ENSP00000263390 | ENSP00000366135 |
| ENSP00000263390 | ENSP00000367406 |
| ENSP00000263390 | ENSP00000369695 |
| ENSP00000263390 | ENSP00000370119 |
| ENSP00000263390 | ENSP00000370968 |
| ENSP00000263390 | ENSP00000374213 |
| ENSP00000263390 | ENSP00000380054 |
| ENSP00000263390 | ENSP00000386134 |
| ENSP00000263390 | ENSP00000386759 |
| ENSP00000263390 | ENSP00000396749 |
| ENSP00000263390 | ENSP00000403852 |
| ENSP00000263409 | ENSP00000279804 |
| ENSP00000263409 | ENSP00000338799 |
| ENSP00000263409 | ENSP00000340944 |
| ENSP00000263409 | ENSP00000355370 |
| ENSP00000263409 | ENSP00000415900 |
| ENSP00000263413 | ENSP00000328940 |
| ENSP00000263413 | ENSP00000354850 |
| ENSP00000263413 | ENSP00000396937 |
| ENSP00000263461 | ENSP00000296328 |
| ENSP00000263461 | ENSP00000342538 |
| ENSP00000263468 | ENSP00000265295 |
| ENSP00000263468 | ENSP00000278919 |
| ENSP00000263468 | ENSP00000334002 |
| ENSP00000263468 | ENSP00000347184 |
| ENSP00000263468 | ENSP00000355596 |
| ENSP00000263468 | ENSP00000358778 |
| ENSP00000263468 | ENSP00000362441 |
| ENSP00000263468 | ENSP00000368797 |
| ENSP00000263468 | ENSP00000378180 |
| ENSP00000263468 | ENSP00000378338 |
| ENSP00000263468 | ENSP00000387262 |
| ENSP00000263512 | ENSP00000355136 |
| ENSP00000263552 | ENSP00000331310 |
| ENSP00000263552 | ENSP00000360398 |
| ENSP00000263552 | ENSP00000371888 |
| ENSP00000263552 | ENSP00000386722 |
| ENSP00000263563 | ENSP00000329411 |
| ENSP00000263563 | ENSP00000360215 |
| ENSP00000263576 | ENSP00000264157 |
| ENSP00000263576 | ENSP00000264883 |

|                 |                 |
|-----------------|-----------------|
| ENSP00000263576 | ENSP00000265351 |
| ENSP00000263576 | ENSP00000265963 |
| ENSP00000263576 | ENSP00000272444 |
| ENSP00000263576 | ENSP00000280154 |
| ENSP00000263576 | ENSP00000290231 |
| ENSP00000263576 | ENSP00000291688 |
| ENSP00000263576 | ENSP00000298532 |
| ENSP00000263576 | ENSP00000300146 |
| ENSP00000263576 | ENSP00000302160 |
| ENSP00000263576 | ENSP00000302790 |
| ENSP00000263576 | ENSP00000307850 |
| ENSP00000263576 | ENSP00000308622 |
| ENSP00000263576 | ENSP00000310596 |
| ENSP00000263576 | ENSP00000316032 |
| ENSP00000263576 | ENSP00000320566 |
| ENSP00000263576 | ENSP00000331817 |
| ENSP00000263576 | ENSP00000337405 |
| ENSP00000263576 | ENSP00000348107 |
| ENSP00000263576 | ENSP00000348577 |
| ENSP00000263576 | ENSP00000353741 |
| ENSP00000263576 | ENSP00000354522 |
| ENSP00000263576 | ENSP00000356448 |
| ENSP00000263576 | ENSP00000358497 |
| ENSP00000263576 | ENSP00000358812 |
| ENSP00000263576 | ENSP00000361949 |
| ENSP00000263576 | ENSP00000366135 |
| ENSP00000263576 | ENSP00000369897 |
| ENSP00000263576 | ENSP00000370105 |
| ENSP00000263576 | ENSP00000371155 |
| ENSP00000263576 | ENSP00000374529 |
| ENSP00000263576 | ENSP00000375809 |
| ENSP00000263576 | ENSP00000391944 |
| ENSP00000263577 | ENSP00000344456 |
| ENSP00000263578 | ENSP00000366135 |
| ENSP00000263578 | ENSP00000374280 |
| ENSP00000263579 | ENSP00000263857 |
| ENSP00000263579 | ENSP00000264029 |
| ENSP00000263579 | ENSP00000264951 |
| ENSP00000263579 | ENSP00000296328 |
| ENSP00000263579 | ENSP00000314949 |
| ENSP00000263579 | ENSP00000361120 |
| ENSP00000263579 | ENSP00000363384 |
| ENSP00000263620 | ENSP00000268058 |
| ENSP00000263620 | ENSP00000303315 |
| ENSP00000263620 | ENSP00000307684 |
| ENSP00000263620 | ENSP00000310649 |

|                 |                 |
|-----------------|-----------------|
| ENSP00000263620 | ENSP00000313419 |
| ENSP00000263620 | ENSP00000323720 |
| ENSP00000263620 | ENSP00000343023 |
| ENSP00000263620 | ENSP00000368686 |
| ENSP00000263629 | ENSP00000263791 |
| ENSP00000263629 | ENSP00000264995 |
| ENSP00000263629 | ENSP00000265537 |
| ENSP00000263629 | ENSP00000265732 |
| ENSP00000263629 | ENSP00000268661 |
| ENSP00000263629 | ENSP00000274606 |
| ENSP00000263629 | ENSP00000274680 |
| ENSP00000263629 | ENSP00000278572 |
| ENSP00000263629 | ENSP00000282276 |
| ENSP00000263629 | ENSP00000292478 |
| ENSP00000263629 | ENSP00000294053 |
| ENSP00000263629 | ENSP00000296577 |
| ENSP00000263629 | ENSP00000296802 |
| ENSP00000263629 | ENSP00000298310 |
| ENSP00000263629 | ENSP00000298746 |
| ENSP00000263629 | ENSP00000299601 |
| ENSP00000263629 | ENSP00000301585 |
| ENSP00000263629 | ENSP00000302160 |
| ENSP00000263629 | ENSP00000302801 |
| ENSP00000263629 | ENSP00000304668 |
| ENSP00000263629 | ENSP00000307889 |
| ENSP00000263629 | ENSP00000308897 |
| ENSP00000263629 | ENSP00000309433 |
| ENSP00000263629 | ENSP00000311430 |
| ENSP00000263629 | ENSP00000318646 |
| ENSP00000263629 | ENSP00000320309 |
| ENSP00000263629 | ENSP00000325448 |
| ENSP00000263629 | ENSP00000329558 |
| ENSP00000263629 | ENSP00000339795 |
| ENSP00000263629 | ENSP00000340093 |
| ENSP00000263629 | ENSP00000343557 |
| ENSP00000263629 | ENSP00000346022 |
| ENSP00000263629 | ENSP00000346120 |
| ENSP00000263629 | ENSP00000346236 |
| ENSP00000263629 | ENSP00000346762 |
| ENSP00000263629 | ENSP00000348107 |
| ENSP00000263629 | ENSP00000352678 |
| ENSP00000263629 | ENSP00000354125 |
| ENSP00000263629 | ENSP00000354739 |
| ENSP00000263629 | ENSP00000356290 |
| ENSP00000263629 | ENSP00000358140 |
| ENSP00000263629 | ENSP00000358497 |

|                 |                 |
|-----------------|-----------------|
| ENSP00000263629 | ENSP00000358563 |
| ENSP00000263629 | ENSP00000358812 |
| ENSP00000263629 | ENSP00000359345 |
| ENSP00000263629 | ENSP00000361076 |
| ENSP00000263629 | ENSP00000361982 |
| ENSP00000263629 | ENSP00000362744 |
| ENSP00000263629 | ENSP00000363944 |
| ENSP00000263629 | ENSP00000364119 |
| ENSP00000263629 | ENSP00000364320 |
| ENSP00000263629 | ENSP00000367498 |
| ENSP00000263629 | ENSP00000367637 |
| ENSP00000263629 | ENSP00000369042 |
| ENSP00000263629 | ENSP00000369162 |
| ENSP00000263629 | ENSP00000370258 |
| ENSP00000263629 | ENSP00000373404 |
| ENSP00000263629 | ENSP00000373700 |
| ENSP00000263629 | ENSP00000377617 |
| ENSP00000263629 | ENSP00000379888 |
| ENSP00000263629 | ENSP00000380982 |
| ENSP00000263629 | ENSP00000393953 |
| ENSP00000263629 | ENSP00000417229 |
| ENSP00000263642 | ENSP00000264926 |
| ENSP00000263642 | ENSP00000265304 |
| ENSP00000263642 | ENSP00000267430 |
| ENSP00000263642 | ENSP00000272444 |
| ENSP00000263642 | ENSP00000287437 |
| ENSP00000263642 | ENSP00000300413 |
| ENSP00000263642 | ENSP00000306561 |
| ENSP00000263642 | ENSP00000307853 |
| ENSP00000263642 | ENSP00000308944 |
| ENSP00000263642 | ENSP00000310520 |
| ENSP00000263642 | ENSP00000314491 |
| ENSP00000263642 | ENSP00000317334 |
| ENSP00000263642 | ENSP00000317376 |
| ENSP00000263642 | ENSP00000322570 |
| ENSP00000263642 | ENSP00000323439 |
| ENSP00000263642 | ENSP00000340019 |
| ENSP00000263642 | ENSP00000340305 |
| ENSP00000263642 | ENSP00000343313 |
| ENSP00000263642 | ENSP00000343392 |
| ENSP00000263642 | ENSP00000343741 |
| ENSP00000263642 | ENSP00000351284 |
| ENSP00000263642 | ENSP00000351697 |
| ENSP00000263642 | ENSP00000354957 |
| ENSP00000263642 | ENSP00000355388 |
| ENSP00000263642 | ENSP00000356411 |

|                 |                 |
|-----------------|-----------------|
| ENSP00000263642 | ENSP00000358576 |
| ENSP00000263642 | ENSP00000362094 |
| ENSP00000263642 | ENSP00000364270 |
| ENSP00000263642 | ENSP00000365439 |
| ENSP00000263642 | ENSP00000368349 |
| ENSP00000263642 | ENSP00000368438 |
| ENSP00000263642 | ENSP00000369335 |
| ENSP00000263642 | ENSP00000370151 |
| ENSP00000263642 | ENSP00000371634 |
| ENSP00000263642 | ENSP00000377344 |
| ENSP00000263642 | ENSP00000377527 |
| ENSP00000263642 | ENSP00000394649 |
| ENSP00000263642 | ENSP00000396937 |
| ENSP00000263642 | ENSP00000401980 |
| ENSP00000263642 | ENSP00000406868 |
| ENSP00000263642 | ENSP00000410833 |
| ENSP00000263642 | ENSP00000420714 |
| ENSP00000263655 | ENSP00000378890 |
| ENSP00000263657 | ENSP00000268802 |
| ENSP00000263657 | ENSP00000270583 |
| ENSP00000263657 | ENSP00000270625 |
| ENSP00000263657 | ENSP00000274606 |
| ENSP00000263657 | ENSP00000274849 |
| ENSP00000263657 | ENSP00000278572 |
| ENSP00000263657 | ENSP00000283109 |
| ENSP00000263657 | ENSP00000291576 |
| ENSP00000263657 | ENSP00000296792 |
| ENSP00000263657 | ENSP00000296802 |
| ENSP00000263657 | ENSP00000297990 |
| ENSP00000263657 | ENSP00000298746 |
| ENSP00000263657 | ENSP00000301364 |
| ENSP00000263657 | ENSP00000302896 |
| ENSP00000263657 | ENSP00000308179 |
| ENSP00000263657 | ENSP00000311028 |
| ENSP00000263657 | ENSP00000311135 |
| ENSP00000263657 | ENSP00000311430 |
| ENSP00000263657 | ENSP00000314193 |
| ENSP00000263657 | ENSP00000315674 |
| ENSP00000263657 | ENSP00000317232 |
| ENSP00000263657 | ENSP00000317334 |
| ENSP00000263657 | ENSP00000318604 |
| ENSP00000263657 | ENSP00000318646 |
| ENSP00000263657 | ENSP00000320917 |
| ENSP00000263657 | ENSP00000324122 |
| ENSP00000263657 | ENSP00000325448 |
| ENSP00000263657 | ENSP00000326981 |

|                 |                 |
|-----------------|-----------------|
| ENSP00000263657 | ENSP00000327179 |
| ENSP00000263657 | ENSP00000328854 |
| ENSP00000263657 | ENSP00000339095 |
| ENSP00000263657 | ENSP00000339795 |
| ENSP00000263657 | ENSP00000340019 |
| ENSP00000263657 | ENSP00000342381 |
| ENSP00000263657 | ENSP00000346050 |
| ENSP00000263657 | ENSP00000346067 |
| ENSP00000263657 | ENSP00000349142 |
| ENSP00000263657 | ENSP00000355471 |
| ENSP00000263657 | ENSP00000355541 |
| ENSP00000263657 | ENSP00000356134 |
| ENSP00000263657 | ENSP00000358563 |
| ENSP00000263657 | ENSP00000358812 |
| ENSP00000263657 | ENSP00000359606 |
| ENSP00000263657 | ENSP00000360031 |
| ENSP00000263657 | ENSP00000361076 |
| ENSP00000263657 | ENSP00000361982 |
| ENSP00000263657 | ENSP00000362744 |
| ENSP00000263657 | ENSP00000363642 |
| ENSP00000263657 | ENSP00000363676 |
| ENSP00000263657 | ENSP00000363746 |
| ENSP00000263657 | ENSP00000364289 |
| ENSP00000263657 | ENSP00000364293 |
| ENSP00000263657 | ENSP00000364320 |
| ENSP00000263657 | ENSP00000365837 |
| ENSP00000263657 | ENSP00000366135 |
| ENSP00000263657 | ENSP00000366557 |
| ENSP00000263657 | ENSP00000368984 |
| ENSP00000263657 | ENSP00000370589 |
| ENSP00000263657 | ENSP00000371101 |
| ENSP00000263657 | ENSP00000372695 |
| ENSP00000263657 | ENSP00000376946 |
| ENSP00000263657 | ENSP00000377865 |
| ENSP00000263657 | ENSP00000379888 |
| ENSP00000263657 | ENSP00000380982 |
| ENSP00000263657 | ENSP00000384302 |
| ENSP00000263657 | ENSP00000384474 |
| ENSP00000263657 | ENSP00000386134 |
| ENSP00000263657 | ENSP00000389103 |
| ENSP00000263657 | ENSP00000399454 |
| ENSP00000263657 | ENSP00000402338 |
| ENSP00000263657 | ENSP00000402869 |
| ENSP00000263657 | ENSP00000405614 |
| ENSP00000263657 | ENSP00000410396 |
| ENSP00000263657 | ENSP00000413152 |

|                 |                 |
|-----------------|-----------------|
| ENSP00000263663 | ENSP00000302640 |
| ENSP00000263663 | ENSP00000314971 |
| ENSP00000263663 | ENSP00000325120 |
| ENSP00000263663 | ENSP00000327072 |
| ENSP00000263663 | ENSP00000366225 |
| ENSP00000263666 | ENSP00000268717 |
| ENSP00000263666 | ENSP00000286627 |
| ENSP00000263666 | ENSP00000295926 |
| ENSP00000263666 | ENSP00000307235 |
| ENSP00000263666 | ENSP00000356623 |
| ENSP00000263666 | ENSP00000363571 |
| ENSP00000263666 | ENSP00000363708 |
| ENSP00000263672 | ENSP00000306574 |
| ENSP00000263672 | ENSP00000329553 |
| ENSP00000263672 | ENSP00000347948 |
| ENSP00000263681 | ENSP00000313829 |
| ENSP00000263681 | ENSP00000330343 |
| ENSP00000263681 | ENSP00000333275 |
| ENSP00000263681 | ENSP00000333633 |
| ENSP00000263681 | ENSP00000352514 |
| ENSP00000263681 | ENSP00000352516 |
| ENSP00000263681 | ENSP00000354951 |
| ENSP00000263681 | ENSP00000362592 |
| ENSP00000263681 | ENSP00000368438 |
| ENSP00000263681 | ENSP00000379607 |
| ENSP00000263686 | ENSP00000265077 |
| ENSP00000263686 | ENSP00000278407 |
| ENSP00000263686 | ENSP00000329380 |
| ENSP00000263686 | ENSP00000351602 |
| ENSP00000263686 | ENSP00000373614 |
| ENSP00000263686 | ENSP00000401287 |
| ENSP00000263688 | ENSP00000305255 |
| ENSP00000263688 | ENSP00000309457 |
| ENSP00000263688 | ENSP00000326534 |
| ENSP00000263688 | ENSP00000327650 |
| ENSP00000263688 | ENSP00000331268 |
| ENSP00000263688 | ENSP00000356562 |
| ENSP00000263688 | ENSP00000360183 |
| ENSP00000263688 | ENSP00000369810 |
| ENSP00000263688 | ENSP00000385347 |
| ENSP00000263688 | ENSP00000390783 |
| ENSP00000263697 | ENSP00000301740 |
| ENSP00000263697 | ENSP00000326261 |
| ENSP00000263702 | ENSP00000272238 |
| ENSP00000263702 | ENSP00000311134 |
| ENSP00000263708 | ENSP00000280362 |

|                 |                 |
|-----------------|-----------------|
| ENSP00000263708 | ENSP00000300574 |
| ENSP00000263708 | ENSP00000302111 |
| ENSP00000263708 | ENSP00000362441 |
| ENSP00000263708 | ENSP00000371051 |
| ENSP00000263710 | ENSP00000263934 |
| ENSP00000263710 | ENSP00000264951 |
| ENSP00000263710 | ENSP00000265104 |
| ENSP00000263710 | ENSP00000271452 |
| ENSP00000263710 | ENSP00000286428 |
| ENSP00000263710 | ENSP00000287598 |
| ENSP00000263710 | ENSP00000291688 |
| ENSP00000263710 | ENSP00000296509 |
| ENSP00000263710 | ENSP00000302530 |
| ENSP00000263710 | ENSP00000323300 |
| ENSP00000263710 | ENSP00000334188 |
| ENSP00000263710 | ENSP00000337445 |
| ENSP00000263710 | ENSP00000347345 |
| ENSP00000263710 | ENSP00000347719 |
| ENSP00000263710 | ENSP00000348554 |
| ENSP00000263710 | ENSP00000348965 |
| ENSP00000263710 | ENSP00000351665 |
| ENSP00000263710 | ENSP00000355560 |
| ENSP00000263710 | ENSP00000356989 |
| ENSP00000263710 | ENSP00000360532 |
| ENSP00000263710 | ENSP00000363734 |
| ENSP00000263710 | ENSP00000366828 |
| ENSP00000263710 | ENSP00000372694 |
| ENSP00000263710 | ENSP00000377793 |
| ENSP00000263710 | ENSP00000378529 |
| ENSP00000263710 | ENSP00000380129 |
| ENSP00000263710 | ENSP00000382562 |
| ENSP00000263710 | ENSP00000412319 |
| ENSP00000263710 | ENSP00000414402 |
| ENSP00000263710 | ENSP00000415678 |
| ENSP00000263734 | ENSP00000264731 |
| ENSP00000263734 | ENSP00000268057 |
| ENSP00000263734 | ENSP00000272937 |
| ENSP00000263734 | ENSP00000282077 |
| ENSP00000263734 | ENSP00000298852 |
| ENSP00000263734 | ENSP00000300086 |
| ENSP00000263734 | ENSP00000329357 |
| ENSP00000263734 | ENSP00000333568 |
| ENSP00000263734 | ENSP00000341208 |
| ENSP00000263734 | ENSP00000351407 |
| ENSP00000263734 | ENSP00000351490 |
| ENSP00000263734 | ENSP00000353701 |



|                 |                 |
|-----------------|-----------------|
| ENSP00000263734 | ENSP00000355601 |
| ENSP00000263734 | ENSP00000367408 |
| ENSP00000263734 | ENSP00000381031 |
| ENSP00000263736 | ENSP00000272252 |
| ENSP00000263736 | ENSP00000278412 |
| ENSP00000263736 | ENSP00000280614 |
| ENSP00000263736 | ENSP00000285896 |
| ENSP00000263736 | ENSP00000292535 |
| ENSP00000263736 | ENSP00000309142 |
| ENSP00000263736 | ENSP00000333376 |
| ENSP00000263736 | ENSP00000353458 |
| ENSP00000263736 | ENSP00000354977 |
| ENSP00000263736 | ENSP00000356405 |
| ENSP00000263736 | ENSP00000365025 |
| ENSP00000263736 | ENSP00000373715 |
| ENSP00000263736 | ENSP00000374280 |
| ENSP00000263753 | ENSP00000311344 |
| ENSP00000263753 | ENSP00000313420 |
| ENSP00000263753 | ENSP00000316121 |
| ENSP00000263753 | ENSP00000339795 |
| ENSP00000263753 | ENSP00000346037 |
| ENSP00000263753 | ENSP00000352257 |
| ENSP00000263753 | ENSP00000355944 |
| ENSP00000263753 | ENSP00000361076 |
| ENSP00000263753 | ENSP00000363018 |
| ENSP00000263753 | ENSP00000378295 |
| ENSP00000263753 | ENSP00000417963 |
| ENSP00000263773 | ENSP00000272163 |
| ENSP00000263773 | ENSP00000313829 |
| ENSP00000263773 | ENSP00000318884 |
| ENSP00000263773 | ENSP00000333950 |
| ENSP00000263773 | ENSP00000370719 |
| ENSP00000263773 | ENSP00000397351 |
| ENSP00000263773 | ENSP00000412566 |
| ENSP00000263774 | ENSP00000264230 |
| ENSP00000263774 | ENSP00000266126 |
| ENSP00000263774 | ENSP00000266544 |
| ENSP00000263774 | ENSP00000295890 |
| ENSP00000263774 | ENSP00000301585 |
| ENSP00000263774 | ENSP00000315774 |
| ENSP00000263774 | ENSP00000322450 |
| ENSP00000263774 | ENSP00000323076 |
| ENSP00000263774 | ENSP00000327268 |
| ENSP00000263774 | ENSP00000337127 |
| ENSP00000263774 | ENSP00000347988 |
| ENSP00000263774 | ENSP00000354665 |

|                 |                 |
|-----------------|-----------------|
| ENSP00000263774 | ENSP00000354687 |
| ENSP00000263774 | ENSP00000354813 |
| ENSP00000263774 | ENSP00000354961 |
| ENSP00000263774 | ENSP00000355877 |
| ENSP00000263774 | ENSP00000356972 |
| ENSP00000263774 | ENSP00000362873 |
| ENSP00000263774 | ENSP00000369176 |
| ENSP00000263774 | ENSP00000394869 |
| ENSP00000263791 | ENSP00000266079 |
| ENSP00000263791 | ENSP00000266126 |
| ENSP00000263791 | ENSP00000273783 |
| ENSP00000263791 | ENSP00000284202 |
| ENSP00000263791 | ENSP00000289371 |
| ENSP00000263791 | ENSP00000296509 |
| ENSP00000263791 | ENSP00000298746 |
| ENSP00000263791 | ENSP00000299767 |
| ENSP00000263791 | ENSP00000300648 |
| ENSP00000263791 | ENSP00000302801 |
| ENSP00000263791 | ENSP00000303315 |
| ENSP00000263791 | ENSP00000304350 |
| ENSP00000263791 | ENSP00000310448 |
| ENSP00000263791 | ENSP00000311005 |
| ENSP00000263791 | ENSP00000313490 |
| ENSP00000263791 | ENSP00000313674 |
| ENSP00000263791 | ENSP00000315925 |
| ENSP00000263791 | ENSP00000323302 |
| ENSP00000263791 | ENSP00000324122 |
| ENSP00000263791 | ENSP00000325448 |
| ENSP00000263791 | ENSP00000336702 |
| ENSP00000263791 | ENSP00000341551 |
| ENSP00000263791 | ENSP00000342381 |
| ENSP00000263791 | ENSP00000353575 |
| ENSP00000263791 | ENSP00000356548 |
| ENSP00000263791 | ENSP00000358563 |
| ENSP00000263791 | ENSP00000360676 |
| ENSP00000263791 | ENSP00000361982 |
| ENSP00000263791 | ENSP00000363308 |
| ENSP00000263791 | ENSP00000363313 |
| ENSP00000263791 | ENSP00000363582 |
| ENSP00000263791 | ENSP00000364119 |
| ENSP00000263791 | ENSP00000370258 |
| ENSP00000263791 | ENSP00000370589 |
| ENSP00000263791 | ENSP00000374399 |
| ENSP00000263791 | ENSP00000381031 |
| ENSP00000263791 | ENSP00000394869 |
| ENSP00000263791 | ENSP00000417229 |

|                 |                 |
|-----------------|-----------------|
| ENSP00000263795 | ENSP00000264108 |
| ENSP00000263795 | ENSP00000264233 |
| ENSP00000263795 | ENSP00000265081 |
| ENSP00000263795 | ENSP00000265304 |
| ENSP00000263795 | ENSP00000278412 |
| ENSP00000263795 | ENSP00000285021 |
| ENSP00000263795 | ENSP00000293860 |
| ENSP00000263795 | ENSP00000296380 |
| ENSP00000263795 | ENSP00000296577 |
| ENSP00000263795 | ENSP00000299601 |
| ENSP00000263795 | ENSP00000303088 |
| ENSP00000263795 | ENSP00000307525 |
| ENSP00000263795 | ENSP00000310129 |
| ENSP00000263795 | ENSP00000313171 |
| ENSP00000263795 | ENSP00000313350 |
| ENSP00000263795 | ENSP00000317039 |
| ENSP00000263795 | ENSP00000328854 |
| ENSP00000263795 | ENSP00000336752 |
| ENSP00000263795 | ENSP00000336868 |
| ENSP00000263795 | ENSP00000341382 |
| ENSP00000263795 | ENSP00000343741 |
| ENSP00000263795 | ENSP00000343943 |
| ENSP00000263795 | ENSP00000346725 |
| ENSP00000263795 | ENSP00000347232 |
| ENSP00000263795 | ENSP00000348596 |
| ENSP00000263795 | ENSP00000351575 |
| ENSP00000263795 | ENSP00000352257 |
| ENSP00000263795 | ENSP00000353741 |
| ENSP00000263795 | ENSP00000358478 |
| ENSP00000263795 | ENSP00000359290 |
| ENSP00000263795 | ENSP00000360031 |
| ENSP00000263795 | ENSP00000363021 |
| ENSP00000263795 | ENSP00000365534 |
| ENSP00000263795 | ENSP00000366828 |
| ENSP00000263795 | ENSP00000366974 |
| ENSP00000263795 | ENSP00000379372 |
| ENSP00000263795 | ENSP00000380504 |
| ENSP00000263795 | ENSP00000384109 |
| ENSP00000263795 | ENSP00000388872 |
| ENSP00000263795 | ENSP00000394649 |
| ENSP00000263795 | ENSP00000396704 |
| ENSP00000263795 | ENSP00000397441 |
| ENSP00000263795 | ENSP00000402515 |
| ENSP00000263795 | ENSP00000403852 |
| ENSP00000263795 | ENSP00000406868 |
| ENSP00000263795 | ENSP00000407047 |

|                 |                 |
|-----------------|-----------------|
| ENSP00000263805 | ENSP00000264108 |
| ENSP00000263805 | ENSP00000265056 |
| ENSP00000263805 | ENSP00000313059 |
| ENSP00000263805 | ENSP00000325690 |
| ENSP00000263805 | ENSP00000330343 |
| ENSP00000263805 | ENSP00000355759 |
| ENSP00000263805 | ENSP00000362041 |
| ENSP00000263805 | ENSP00000362592 |
| ENSP00000263805 | ENSP00000381698 |
| ENSP00000263805 | ENSP00000392601 |
| ENSP00000263816 | ENSP00000273951 |
| ENSP00000263816 | ENSP00000277480 |
| ENSP00000263816 | ENSP00000278282 |
| ENSP00000263816 | ENSP00000295897 |
| ENSP00000263816 | ENSP00000296785 |
| ENSP00000263816 | ENSP00000313084 |
| ENSP00000263816 | ENSP00000313391 |
| ENSP00000263816 | ENSP00000321334 |
| ENSP00000263816 | ENSP00000330393 |
| ENSP00000263816 | ENSP00000332681 |
| ENSP00000263816 | ENSP00000340698 |
| ENSP00000263816 | ENSP00000345731 |
| ENSP00000263816 | ENSP00000347504 |
| ENSP00000263816 | ENSP00000348986 |
| ENSP00000263816 | ENSP00000355133 |
| ENSP00000263816 | ENSP00000355146 |
| ENSP00000263816 | ENSP00000367064 |
| ENSP00000263816 | ENSP00000368678 |
| ENSP00000263816 | ENSP00000381793 |
| ENSP00000263817 | ENSP00000265316 |
| ENSP00000263817 | ENSP00000301263 |
| ENSP00000263817 | ENSP00000310129 |
| ENSP00000263817 | ENSP00000329002 |
| ENSP00000263817 | ENSP00000362334 |
| ENSP00000263817 | ENSP00000410758 |
| ENSP00000263851 | ENSP00000306157 |
| ENSP00000263856 | ENSP00000265388 |
| ENSP00000263856 | ENSP00000273398 |
| ENSP00000263856 | ENSP00000290330 |
| ENSP00000263856 | ENSP00000297265 |
| ENSP00000263856 | ENSP00000302239 |
| ENSP00000263856 | ENSP00000302896 |
| ENSP00000263856 | ENSP00000310440 |
| ENSP00000263856 | ENSP00000317468 |
| ENSP00000263856 | ENSP00000318629 |
| ENSP00000263856 | ENSP00000330408 |

|                 |                 |
|-----------------|-----------------|
| ENSP00000263856 | ENSP00000331201 |
| ENSP00000263856 | ENSP00000331719 |
| ENSP00000263856 | ENSP00000339208 |
| ENSP00000263856 | ENSP00000345216 |
| ENSP00000263856 | ENSP00000356602 |
| ENSP00000263856 | ENSP00000360916 |
| ENSP00000263856 | ENSP00000366225 |
| ENSP00000263856 | ENSP00000366565 |
| ENSP00000263856 | ENSP00000366746 |
| ENSP00000263856 | ENSP00000367299 |
| ENSP00000263856 | ENSP00000378368 |
| ENSP00000263856 | ENSP00000379500 |
| ENSP00000263856 | ENSP00000391432 |
| ENSP00000263857 | ENSP00000263956 |
| ENSP00000263857 | ENSP00000264010 |
| ENSP00000263857 | ENSP00000264995 |
| ENSP00000263857 | ENSP00000268661 |
| ENSP00000263857 | ENSP00000272418 |
| ENSP00000263857 | ENSP00000276014 |
| ENSP00000263857 | ENSP00000278412 |
| ENSP00000263857 | ENSP00000278572 |
| ENSP00000263857 | ENSP00000286317 |
| ENSP00000263857 | ENSP00000286835 |
| ENSP00000263857 | ENSP00000288937 |
| ENSP00000263857 | ENSP00000288976 |
| ENSP00000263857 | ENSP00000291386 |
| ENSP00000263857 | ENSP00000293860 |
| ENSP00000263857 | ENSP00000296674 |
| ENSP00000263857 | ENSP00000296786 |
| ENSP00000263857 | ENSP00000298281 |
| ENSP00000263857 | ENSP00000298746 |
| ENSP00000263857 | ENSP00000299853 |
| ENSP00000263857 | ENSP00000302478 |
| ENSP00000263857 | ENSP00000302640 |
| ENSP00000263857 | ENSP00000303515 |
| ENSP00000263857 | ENSP00000309433 |
| ENSP00000263857 | ENSP00000310966 |
| ENSP00000263857 | ENSP00000311977 |
| ENSP00000263857 | ENSP00000314311 |
| ENSP00000263857 | ENSP00000314971 |
| ENSP00000263857 | ENSP00000315791 |
| ENSP00000263857 | ENSP00000317334 |
| ENSP00000263857 | ENSP00000318604 |
| ENSP00000263857 | ENSP00000321636 |
| ENSP00000263857 | ENSP00000322570 |
| ENSP00000263857 | ENSP00000323720 |

|                 |                 |
|-----------------|-----------------|
| ENSP00000263857 | ENSP00000324122 |
| ENSP00000263857 | ENSP00000324124 |
| ENSP00000263857 | ENSP00000327821 |
| ENSP00000263857 | ENSP00000329466 |
| ENSP00000263857 | ENSP00000331111 |
| ENSP00000263857 | ENSP00000332171 |
| ENSP00000263857 | ENSP00000333920 |
| ENSP00000263857 | ENSP00000335357 |
| ENSP00000263857 | ENSP00000336606 |
| ENSP00000263857 | ENSP00000337405 |
| ENSP00000263857 | ENSP00000341885 |
| ENSP00000263857 | ENSP00000342889 |
| ENSP00000263857 | ENSP00000345096 |
| ENSP00000263857 | ENSP00000346015 |
| ENSP00000263857 | ENSP00000348010 |
| ENSP00000263857 | ENSP00000348089 |
| ENSP00000263857 | ENSP00000351284 |
| ENSP00000263857 | ENSP00000351575 |
| ENSP00000263857 | ENSP00000351697 |
| ENSP00000263857 | ENSP00000351885 |
| ENSP00000263857 | ENSP00000354916 |
| ENSP00000263857 | ENSP00000355051 |
| ENSP00000263857 | ENSP00000356146 |
| ENSP00000263857 | ENSP00000356470 |
| ENSP00000263857 | ENSP00000356807 |
| ENSP00000263857 | ENSP00000357882 |
| ENSP00000263857 | ENSP00000358497 |
| ENSP00000263857 | ENSP00000358563 |
| ENSP00000263857 | ENSP00000358812 |
| ENSP00000263857 | ENSP00000359290 |
| ENSP00000263857 | ENSP00000359688 |
| ENSP00000263857 | ENSP00000359818 |
| ENSP00000263857 | ENSP00000360532 |
| ENSP00000263857 | ENSP00000360676 |
| ENSP00000263857 | ENSP00000361465 |
| ENSP00000263857 | ENSP00000361982 |
| ENSP00000263857 | ENSP00000363021 |
| ENSP00000263857 | ENSP00000363779 |
| ENSP00000263857 | ENSP00000363944 |
| ENSP00000263857 | ENSP00000364289 |
| ENSP00000263857 | ENSP00000364293 |
| ENSP00000263857 | ENSP00000366135 |
| ENSP00000263857 | ENSP00000366557 |
| ENSP00000263857 | ENSP00000366828 |
| ENSP00000263857 | ENSP00000366974 |
| ENSP00000263857 | ENSP00000367029 |

|                 |                 |
|-----------------|-----------------|
| ENSP00000263857 | ENSP00000368349 |
| ENSP00000263857 | ENSP00000368927 |
| ENSP00000263857 | ENSP00000370589 |
| ENSP00000263857 | ENSP00000370968 |
| ENSP00000263857 | ENSP00000373404 |
| ENSP00000263857 | ENSP00000374213 |
| ENSP00000263857 | ENSP00000375809 |
| ENSP00000263857 | ENSP00000376946 |
| ENSP00000263857 | ENSP00000379158 |
| ENSP00000263857 | ENSP00000379372 |
| ENSP00000263857 | ENSP00000380460 |
| ENSP00000263857 | ENSP00000380504 |
| ENSP00000263857 | ENSP00000383503 |
| ENSP00000263857 | ENSP00000389103 |
| ENSP00000263857 | ENSP00000392859 |
| ENSP00000263857 | ENSP00000397636 |
| ENSP00000263857 | ENSP00000403852 |
| ENSP00000263857 | ENSP00000405636 |
| ENSP00000263857 | ENSP00000410530 |
| ENSP00000263857 | ENSP00000410954 |
| ENSP00000263857 | ENSP00000414110 |
| ENSP00000263857 | ENSP00000416599 |
| ENSP00000263881 | ENSP00000284637 |
| ENSP00000263881 | ENSP00000350512 |
| ENSP00000263881 | ENSP00000355136 |
| ENSP00000263881 | ENSP00000361640 |
| ENSP00000263881 | ENSP00000366746 |
| ENSP00000263881 | ENSP00000382423 |
| ENSP00000263897 | ENSP00000264157 |
| ENSP00000263897 | ENSP00000286448 |
| ENSP00000263897 | ENSP00000294179 |
| ENSP00000263897 | ENSP00000298854 |
| ENSP00000263897 | ENSP00000304051 |
| ENSP00000263897 | ENSP00000304321 |
| ENSP00000263897 | ENSP00000305255 |
| ENSP00000263897 | ENSP00000305810 |
| ENSP00000263897 | ENSP00000308944 |
| ENSP00000263897 | ENSP00000310521 |
| ENSP00000263897 | ENSP00000317714 |
| ENSP00000263897 | ENSP00000324628 |
| ENSP00000263897 | ENSP00000327650 |
| ENSP00000263897 | ENSP00000328203 |
| ENSP00000263897 | ENSP00000334657 |
| ENSP00000263897 | ENSP00000342755 |
| ENSP00000263897 | ENSP00000354032 |
| ENSP00000263897 | ENSP00000355028 |

|                 |                 |
|-----------------|-----------------|
| ENSP00000263897 | ENSP00000355721 |
| ENSP00000263897 | ENSP00000361990 |
| ENSP00000263897 | ENSP00000362399 |
| ENSP00000263897 | ENSP00000366225 |
| ENSP00000263897 | ENSP00000366395 |
| ENSP00000263897 | ENSP00000374529 |
| ENSP00000263897 | ENSP00000381293 |
| ENSP00000263897 | ENSP00000390783 |
| ENSP00000263897 | ENSP00000417281 |
| ENSP00000263925 | ENSP00000264935 |
| ENSP00000263925 | ENSP00000283635 |
| ENSP00000263925 | ENSP00000283646 |
| ENSP00000263925 | ENSP00000300181 |
| ENSP00000263925 | ENSP00000301727 |
| ENSP00000263925 | ENSP00000311202 |
| ENSP00000263925 | ENSP00000336606 |
| ENSP00000263925 | ENSP00000341679 |
| ENSP00000263925 | ENSP00000347169 |
| ENSP00000263925 | ENSP00000349576 |
| ENSP00000263925 | ENSP00000354201 |
| ENSP00000263925 | ENSP00000354911 |
| ENSP00000263925 | ENSP00000359507 |
| ENSP00000263925 | ENSP00000369962 |
| ENSP00000263925 | ENSP00000382595 |
| ENSP00000263925 | ENSP00000384391 |
| ENSP00000263934 | ENSP00000284981 |
| ENSP00000263934 | ENSP00000290607 |
| ENSP00000263934 | ENSP00000299601 |
| ENSP00000263934 | ENSP00000340698 |
| ENSP00000263934 | ENSP00000340820 |
| ENSP00000263934 | ENSP00000345731 |
| ENSP00000263934 | ENSP00000350283 |
| ENSP00000263934 | ENSP00000353508 |
| ENSP00000263934 | ENSP00000357651 |
| ENSP00000263934 | ENSP00000358283 |
| ENSP00000263934 | ENSP00000388373 |
| ENSP00000263934 | ENSP00000414187 |
| ENSP00000263956 | ENSP00000264720 |
| ENSP00000263956 | ENSP00000265351 |
| ENSP00000263956 | ENSP00000278412 |
| ENSP00000263956 | ENSP00000296328 |
| ENSP00000263956 | ENSP00000302790 |
| ENSP00000263956 | ENSP00000303088 |
| ENSP00000263956 | ENSP00000304704 |
| ENSP00000263956 | ENSP00000314949 |
| ENSP00000263956 | ENSP00000315791 |



|                 |                 |
|-----------------|-----------------|
| ENSP00000263956 | ENSP00000329029 |
| ENSP00000263956 | ENSP00000329466 |
| ENSP00000263956 | ENSP00000332444 |
| ENSP00000263956 | ENSP00000334564 |
| ENSP00000263956 | ENSP00000336856 |
| ENSP00000263956 | ENSP00000339353 |
| ENSP00000263956 | ENSP00000341243 |
| ENSP00000263956 | ENSP00000342889 |
| ENSP00000263956 | ENSP00000348010 |
| ENSP00000263956 | ENSP00000349213 |
| ENSP00000263956 | ENSP00000351575 |
| ENSP00000263956 | ENSP00000351947 |
| ENSP00000263956 | ENSP00000353622 |
| ENSP00000263956 | ENSP00000354723 |
| ENSP00000263956 | ENSP00000355185 |
| ENSP00000263956 | ENSP00000355384 |
| ENSP00000263956 | ENSP00000358576 |
| ENSP00000263956 | ENSP00000361180 |
| ENSP00000263956 | ENSP00000361219 |
| ENSP00000263956 | ENSP00000366828 |
| ENSP00000263956 | ENSP00000367527 |
| ENSP00000263956 | ENSP00000369100 |
| ENSP00000263956 | ENSP00000374455 |
| ENSP00000263956 | ENSP00000398208 |
| ENSP00000263966 | ENSP00000267169 |
| ENSP00000263966 | ENSP00000274255 |
| ENSP00000263966 | ENSP00000286835 |
| ENSP00000263966 | ENSP00000297185 |
| ENSP00000263966 | ENSP00000303279 |
| ENSP00000263966 | ENSP00000308339 |
| ENSP00000263966 | ENSP00000322457 |
| ENSP00000263966 | ENSP00000323913 |
| ENSP00000263966 | ENSP00000331487 |
| ENSP00000263966 | ENSP00000335304 |
| ENSP00000263966 | ENSP00000343535 |
| ENSP00000263966 | ENSP00000353804 |
| ENSP00000263966 | ENSP00000354720 |
| ENSP00000263966 | ENSP00000356146 |
| ENSP00000263966 | ENSP00000356652 |
| ENSP00000263966 | ENSP00000358497 |
| ENSP00000263966 | ENSP00000364486 |
| ENSP00000263966 | ENSP00000364794 |
| ENSP00000263966 | ENSP00000370258 |
| ENSP00000263966 | ENSP00000380460 |
| ENSP00000263966 | ENSP00000406490 |
| ENSP00000263966 | ENSP00000419235 |

|                 |                 |
|-----------------|-----------------|
| ENSP00000263974 | ENSP00000264193 |
| ENSP00000263974 | ENSP00000265354 |
| ENSP00000263974 | ENSP00000265970 |
| ENSP00000263974 | ENSP00000265990 |
| ENSP00000263974 | ENSP00000269127 |
| ENSP00000263974 | ENSP00000276072 |
| ENSP00000263974 | ENSP00000278616 |
| ENSP00000263974 | ENSP00000298532 |
| ENSP00000263974 | ENSP00000299424 |
| ENSP00000263974 | ENSP00000303315 |
| ENSP00000263974 | ENSP00000306983 |
| ENSP00000263974 | ENSP00000307684 |
| ENSP00000263974 | ENSP00000308944 |
| ENSP00000263974 | ENSP00000313420 |
| ENSP00000263974 | ENSP00000314949 |
| ENSP00000263974 | ENSP00000316114 |
| ENSP00000263974 | ENSP00000320949 |
| ENSP00000263974 | ENSP00000327072 |
| ENSP00000263974 | ENSP00000329029 |
| ENSP00000263974 | ENSP00000331310 |
| ENSP00000263974 | ENSP00000332171 |
| ENSP00000263974 | ENSP00000333920 |
| ENSP00000263974 | ENSP00000334061 |
| ENSP00000263974 | ENSP00000337405 |
| ENSP00000263974 | ENSP00000339353 |
| ENSP00000263974 | ENSP00000340271 |
| ENSP00000263974 | ENSP00000341243 |
| ENSP00000263974 | ENSP00000343741 |
| ENSP00000263974 | ENSP00000344537 |
| ENSP00000263974 | ENSP00000345702 |
| ENSP00000263974 | ENSP00000347733 |
| ENSP00000263974 | ENSP00000348089 |
| ENSP00000263974 | ENSP00000350359 |
| ENSP00000263974 | ENSP00000352121 |
| ENSP00000263974 | ENSP00000354558 |
| ENSP00000263974 | ENSP00000354633 |
| ENSP00000263974 | ENSP00000355051 |
| ENSP00000263974 | ENSP00000355205 |
| ENSP00000263974 | ENSP00000358854 |
| ENSP00000263974 | ENSP00000359531 |
| ENSP00000263974 | ENSP00000360515 |
| ENSP00000263974 | ENSP00000362068 |
| ENSP00000263974 | ENSP00000366974 |
| ENSP00000263974 | ENSP00000367406 |
| ENSP00000263974 | ENSP00000369695 |
| ENSP00000263974 | ENSP00000369716 |

|                 |                 |
|-----------------|-----------------|
| ENSP00000263974 | ENSP00000374213 |
| ENSP00000263974 | ENSP00000377747 |
| ENSP00000263974 | ENSP00000386759 |
| ENSP00000263974 | ENSP00000392028 |
| ENSP00000263974 | ENSP00000396620 |
| ENSP00000263974 | ENSP00000397259 |
| ENSP00000263974 | ENSP00000402338 |
| ENSP00000263974 | ENSP00000402515 |
| ENSP00000263974 | ENSP00000414006 |
| ENSP00000263985 | ENSP00000264161 |
| ENSP00000263985 | ENSP00000348395 |
| ENSP00000263985 | ENSP00000358042 |
| ENSP00000263985 | ENSP00000364035 |
| ENSP00000263997 | ENSP00000272645 |
| ENSP00000263997 | ENSP00000283351 |
| ENSP00000263997 | ENSP00000296328 |
| ENSP00000263997 | ENSP00000301788 |
| ENSP00000263997 | ENSP00000303315 |
| ENSP00000263997 | ENSP00000305459 |
| ENSP00000263997 | ENSP00000307850 |
| ENSP00000263997 | ENSP00000312735 |
| ENSP00000263997 | ENSP00000314949 |
| ENSP00000263997 | ENSP00000324124 |
| ENSP00000263997 | ENSP00000327716 |
| ENSP00000263997 | ENSP00000340823 |
| ENSP00000263997 | ENSP00000342889 |
| ENSP00000263997 | ENSP00000353698 |
| ENSP00000263997 | ENSP00000359290 |
| ENSP00000263997 | ENSP00000362135 |
| ENSP00000263997 | ENSP00000377969 |
| ENSP00000263997 | ENSP00000403852 |
| ENSP00000264005 | ENSP00000265052 |
| ENSP00000264005 | ENSP00000265175 |
| ENSP00000264005 | ENSP00000322218 |
| ENSP00000264005 | ENSP00000332258 |
| ENSP00000264005 | ENSP00000356591 |
| ENSP00000264010 | ENSP00000264169 |
| ENSP00000264010 | ENSP00000276072 |
| ENSP00000264010 | ENSP00000296930 |
| ENSP00000264010 | ENSP00000297338 |
| ENSP00000264010 | ENSP00000302640 |
| ENSP00000264010 | ENSP00000310966 |
| ENSP00000264010 | ENSP00000314949 |
| ENSP00000264010 | ENSP00000316578 |
| ENSP00000264010 | ENSP00000329466 |
| ENSP00000264010 | ENSP00000330343 |

|                 |                 |
|-----------------|-----------------|
| ENSP00000264010 | ENSP00000340271 |
| ENSP00000264010 | ENSP00000341551 |
| ENSP00000264010 | ENSP00000353622 |
| ENSP00000264010 | ENSP00000354720 |
| ENSP00000264010 | ENSP00000355759 |
| ENSP00000264010 | ENSP00000357283 |
| ENSP00000264010 | ENSP00000362441 |
| ENSP00000264010 | ENSP00000367029 |
| ENSP00000264010 | ENSP00000392028 |
| ENSP00000264010 | ENSP00000417281 |
| ENSP00000264020 | ENSP00000302913 |
| ENSP00000264027 | ENSP00000264451 |
| ENSP00000264027 | ENSP00000265896 |
| ENSP00000264027 | ENSP00000266095 |
| ENSP00000264027 | ENSP00000269703 |
| ENSP00000264027 | ENSP00000272163 |
| ENSP00000264027 | ENSP00000272322 |
| ENSP00000264027 | ENSP00000277010 |
| ENSP00000264027 | ENSP00000285949 |
| ENSP00000264027 | ENSP00000287936 |
| ENSP00000264027 | ENSP00000310721 |
| ENSP00000264027 | ENSP00000320604 |
| ENSP00000264027 | ENSP00000325425 |
| ENSP00000264027 | ENSP00000330812 |
| ENSP00000264027 | ENSP00000332258 |
| ENSP00000264027 | ENSP00000333946 |
| ENSP00000264027 | ENSP00000348380 |
| ENSP00000264027 | ENSP00000348762 |
| ENSP00000264027 | ENSP00000354522 |
| ENSP00000264027 | ENSP00000355517 |
| ENSP00000264027 | ENSP00000356591 |
| ENSP00000264027 | ENSP00000356989 |
| ENSP00000264027 | ENSP00000357775 |
| ENSP00000264027 | ENSP00000357998 |
| ENSP00000264027 | ENSP00000358695 |
| ENSP00000264027 | ENSP00000359067 |
| ENSP00000264027 | ENSP00000359380 |
| ENSP00000264027 | ENSP00000360918 |
| ENSP00000264027 | ENSP00000371236 |
| ENSP00000264027 | ENSP00000372697 |
| ENSP00000264027 | ENSP00000376268 |
| ENSP00000264027 | ENSP00000379430 |
| ENSP00000264027 | ENSP00000386284 |
| ENSP00000264027 | ENSP00000389934 |
| ENSP00000264027 | ENSP00000390831 |
| ENSP00000264027 | ENSP00000391197 |

|                 |                 |
|-----------------|-----------------|
| ENSP00000264027 | ENSP00000401445 |
| ENSP00000264027 | ENSP00000404016 |
| ENSP00000264027 | ENSP00000406988 |
| ENSP00000264027 | ENSP00000409952 |
| ENSP00000264028 | ENSP00000265070 |
| ENSP00000264028 | ENSP00000269216 |
| ENSP00000264028 | ENSP00000270176 |
| ENSP00000264028 | ENSP00000283943 |
| ENSP00000264028 | ENSP00000286448 |
| ENSP00000264028 | ENSP00000299767 |
| ENSP00000264028 | ENSP00000310521 |
| ENSP00000264028 | ENSP00000312735 |
| ENSP00000264028 | ENSP00000325002 |
| ENSP00000264028 | ENSP00000325369 |
| ENSP00000264028 | ENSP00000329419 |
| ENSP00000264028 | ENSP00000330945 |
| ENSP00000264028 | ENSP00000341243 |
| ENSP00000264028 | ENSP00000345530 |
| ENSP00000264028 | ENSP00000345681 |
| ENSP00000264028 | ENSP00000346015 |
| ENSP00000264028 | ENSP00000349970 |
| ENSP00000264028 | ENSP00000352738 |
| ENSP00000264028 | ENSP00000355231 |
| ENSP00000264028 | ENSP00000356744 |
| ENSP00000264028 | ENSP00000357048 |
| ENSP00000264028 | ENSP00000360183 |
| ENSP00000264028 | ENSP00000360532 |
| ENSP00000264028 | ENSP00000360798 |
| ENSP00000264028 | ENSP00000361287 |
| ENSP00000264028 | ENSP00000364188 |
| ENSP00000264028 | ENSP00000365567 |
| ENSP00000264028 | ENSP00000379065 |
| ENSP00000264028 | ENSP00000379228 |
| ENSP00000264028 | ENSP00000384434 |
| ENSP00000264028 | ENSP00000397435 |
| ENSP00000264028 | ENSP00000397441 |
| ENSP00000264029 | ENSP00000264335 |
| ENSP00000264029 | ENSP00000272902 |
| ENSP00000264029 | ENSP00000301329 |
| ENSP00000264029 | ENSP00000303208 |
| ENSP00000264029 | ENSP00000306574 |
| ENSP00000264029 | ENSP00000311768 |
| ENSP00000264029 | ENSP00000313432 |
| ENSP00000264029 | ENSP00000322991 |
| ENSP00000264029 | ENSP00000326813 |
| ENSP00000264029 | ENSP00000331817 |

|                 |                 |
|-----------------|-----------------|
| ENSP00000264029 | ENSP00000338703 |
| ENSP00000264029 | ENSP00000344460 |
| ENSP00000264029 | ENSP00000348395 |
| ENSP00000264029 | ENSP00000349022 |
| ENSP00000264029 | ENSP00000353458 |
| ENSP00000264029 | ENSP00000356903 |
| ENSP00000264029 | ENSP00000360031 |
| ENSP00000264029 | ENSP00000360286 |
| ENSP00000264029 | ENSP00000362463 |
| ENSP00000264029 | ENSP00000364293 |
| ENSP00000264029 | ENSP00000369335 |
| ENSP00000264029 | ENSP00000387185 |
| ENSP00000264029 | ENSP00000396704 |
| ENSP00000264036 | ENSP00000323687 |
| ENSP00000264042 | ENSP00000306523 |
| ENSP00000264042 | ENSP00000339826 |
| ENSP00000264047 | ENSP00000328088 |
| ENSP00000264047 | ENSP00000345530 |
| ENSP00000264065 | ENSP00000265174 |
| ENSP00000264065 | ENSP00000265462 |
| ENSP00000264065 | ENSP00000270538 |
| ENSP00000264065 | ENSP00000278572 |
| ENSP00000264065 | ENSP00000292180 |
| ENSP00000264065 | ENSP00000294053 |
| ENSP00000264065 | ENSP00000296411 |
| ENSP00000264065 | ENSP00000296577 |
| ENSP00000264065 | ENSP00000296805 |
| ENSP00000264065 | ENSP00000297338 |
| ENSP00000264065 | ENSP00000299767 |
| ENSP00000264065 | ENSP00000304350 |
| ENSP00000264065 | ENSP00000307525 |
| ENSP00000264065 | ENSP00000312735 |
| ENSP00000264065 | ENSP00000318147 |
| ENSP00000264065 | ENSP00000321259 |
| ENSP00000264065 | ENSP00000325312 |
| ENSP00000264065 | ENSP00000330836 |
| ENSP00000264065 | ENSP00000335321 |
| ENSP00000264065 | ENSP00000351137 |
| ENSP00000264065 | ENSP00000357998 |
| ENSP00000264065 | ENSP00000362110 |
| ENSP00000264065 | ENSP00000368565 |
| ENSP00000264065 | ENSP00000379607 |
| ENSP00000264093 | ENSP00000270625 |
| ENSP00000264093 | ENSP00000271452 |
| ENSP00000264093 | ENSP00000322706 |
| ENSP00000264093 | ENSP00000382595 |

|                 |                 |
|-----------------|-----------------|
| ENSP00000264093 | ENSP00000394382 |
| ENSP00000264108 | ENSP00000264169 |
| ENSP00000264108 | ENSP00000264183 |
| ENSP00000264108 | ENSP00000264705 |
| ENSP00000264108 | ENSP00000265056 |
| ENSP00000264108 | ENSP00000265462 |
| ENSP00000264108 | ENSP00000267197 |
| ENSP00000264108 | ENSP00000267568 |
| ENSP00000264108 | ENSP00000267953 |
| ENSP00000264108 | ENSP00000274242 |
| ENSP00000264108 | ENSP00000278412 |
| ENSP00000264108 | ENSP00000282185 |
| ENSP00000264108 | ENSP00000282412 |
| ENSP00000264108 | ENSP00000286349 |
| ENSP00000264108 | ENSP00000297431 |
| ENSP00000264108 | ENSP00000299767 |
| ENSP00000264108 | ENSP00000306682 |
| ENSP00000264108 | ENSP00000312244 |
| ENSP00000264108 | ENSP00000312870 |
| ENSP00000264108 | ENSP00000323678 |
| ENSP00000264108 | ENSP00000329466 |
| ENSP00000264108 | ENSP00000331310 |
| ENSP00000264108 | ENSP00000331817 |
| ENSP00000264108 | ENSP00000346453 |
| ENSP00000264108 | ENSP00000347602 |
| ENSP00000264108 | ENSP00000350767 |
| ENSP00000264108 | ENSP00000354125 |
| ENSP00000264108 | ENSP00000355011 |
| ENSP00000264108 | ENSP00000357965 |
| ENSP00000264108 | ENSP00000358140 |
| ENSP00000264108 | ENSP00000359818 |
| ENSP00000264108 | ENSP00000360515 |
| ENSP00000264108 | ENSP00000360621 |
| ENSP00000264108 | ENSP00000365877 |
| ENSP00000264108 | ENSP00000366974 |
| ENSP00000264108 | ENSP00000367408 |
| ENSP00000264108 | ENSP00000370258 |
| ENSP00000264108 | ENSP00000377793 |
| ENSP00000264108 | ENSP00000379607 |
| ENSP00000264108 | ENSP00000402084 |
| ENSP00000264108 | ENSP00000404658 |
| ENSP00000264108 | ENSP00000417132 |
| ENSP00000264108 | ENSP00000417229 |
| ENSP00000264108 | ENSP00000420588 |
| ENSP00000264122 | ENSP00000269485 |
| ENSP00000264122 | ENSP00000278888 |

|                 |                 |
|-----------------|-----------------|
| ENSP00000264122 | ENSP00000281172 |
| ENSP00000264122 | ENSP00000295901 |
| ENSP00000264122 | ENSP00000296474 |
| ENSP00000264122 | ENSP00000300574 |
| ENSP00000264122 | ENSP00000302913 |
| ENSP00000264122 | ENSP00000304311 |
| ENSP00000264122 | ENSP00000305133 |
| ENSP00000264122 | ENSP00000308774 |
| ENSP00000264122 | ENSP00000309474 |
| ENSP00000264122 | ENSP00000313419 |
| ENSP00000264122 | ENSP00000316460 |
| ENSP00000264122 | ENSP00000340944 |
| ENSP00000264122 | ENSP00000343785 |
| ENSP00000264122 | ENSP00000345530 |
| ENSP00000264122 | ENSP00000347942 |
| ENSP00000264122 | ENSP00000349727 |
| ENSP00000264122 | ENSP00000350297 |
| ENSP00000264122 | ENSP00000355136 |
| ENSP00000264122 | ENSP00000360916 |
| ENSP00000264122 | ENSP00000363089 |
| ENSP00000264122 | ENSP00000364893 |
| ENSP00000264122 | ENSP00000364898 |
| ENSP00000264122 | ENSP00000366843 |
| ENSP00000264122 | ENSP00000370719 |
| ENSP00000264122 | ENSP00000380150 |
| ENSP00000264122 | ENSP00000380921 |
| ENSP00000264126 | ENSP00000264233 |
| ENSP00000264126 | ENSP00000265148 |
| ENSP00000264126 | ENSP00000324020 |
| ENSP00000264126 | ENSP00000341848 |
| ENSP00000264126 | ENSP00000345731 |
| ENSP00000264126 | ENSP00000353854 |
| ENSP00000264126 | ENSP00000354158 |
| ENSP00000264126 | ENSP00000354486 |
| ENSP00000264126 | ENSP00000355922 |
| ENSP00000264126 | ENSP00000360141 |
| ENSP00000264126 | ENSP00000361467 |
| ENSP00000264126 | ENSP00000363921 |
| ENSP00000264126 | ENSP00000368872 |
| ENSP00000264126 | ENSP00000380150 |
| ENSP00000264151 | ENSP00000272424 |
| ENSP00000264151 | ENSP00000311984 |
| ENSP00000264151 | ENSP00000356476 |
| ENSP00000264151 | ENSP00000361186 |
| ENSP00000264151 | ENSP00000365534 |
| ENSP00000264151 | ENSP00000365943 |



|                 |                 |
|-----------------|-----------------|
| ENSP00000264157 | ENSP00000264515 |
| ENSP00000264157 | ENSP00000264926 |
| ENSP00000264157 | ENSP00000265343 |
| ENSP00000264157 | ENSP00000267163 |
| ENSP00000264157 | ENSP00000273064 |
| ENSP00000264157 | ENSP00000283109 |
| ENSP00000264157 | ENSP00000285896 |
| ENSP00000264157 | ENSP00000286448 |
| ENSP00000264157 | ENSP00000287598 |
| ENSP00000264157 | ENSP00000294179 |
| ENSP00000264157 | ENSP00000295066 |
| ENSP00000264157 | ENSP00000299601 |
| ENSP00000264157 | ENSP00000302160 |
| ENSP00000264157 | ENSP00000302530 |
| ENSP00000264157 | ENSP00000304903 |
| ENSP00000264157 | ENSP00000305810 |
| ENSP00000264157 | ENSP00000307850 |
| ENSP00000264157 | ENSP00000308546 |
| ENSP00000264157 | ENSP00000320566 |
| ENSP00000264157 | ENSP00000320949 |
| ENSP00000264157 | ENSP00000323720 |
| ENSP00000264157 | ENSP00000325677 |
| ENSP00000264157 | ENSP00000328773 |
| ENSP00000264157 | ENSP00000331817 |
| ENSP00000264157 | ENSP00000340896 |
| ENSP00000264157 | ENSP00000348010 |
| ENSP00000264157 | ENSP00000353622 |
| ENSP00000264157 | ENSP00000354673 |
| ENSP00000264157 | ENSP00000356405 |
| ENSP00000264157 | ENSP00000357440 |
| ENSP00000264157 | ENSP00000359290 |
| ENSP00000264157 | ENSP00000360183 |
| ENSP00000264157 | ENSP00000362900 |
| ENSP00000264157 | ENSP00000366225 |
| ENSP00000264157 | ENSP00000368459 |
| ENSP00000264157 | ENSP00000369695 |
| ENSP00000264157 | ENSP00000374280 |
| ENSP00000264157 | ENSP00000381657 |
| ENSP00000264157 | ENSP00000390783 |
| ENSP00000264158 | ENSP00000351832 |
| ENSP00000264158 | ENSP00000368686 |
| ENSP00000264159 | ENSP00000325863 |
| ENSP00000264159 | ENSP00000369335 |
| ENSP00000264160 | ENSP00000265350 |
| ENSP00000264160 | ENSP00000267064 |
| ENSP00000264160 | ENSP00000268379 |

|                 |                 |
|-----------------|-----------------|
| ENSP00000264160 | ENSP00000286317 |
| ENSP00000264160 | ENSP00000292035 |
| ENSP00000264160 | ENSP00000293777 |
| ENSP00000264160 | ENSP00000323720 |
| ENSP00000264160 | ENSP00000357907 |
| ENSP00000264160 | ENSP00000362948 |
| ENSP00000264160 | ENSP00000384048 |
| ENSP00000264160 | ENSP00000391774 |
| ENSP00000264160 | ENSP00000392617 |
| ENSP00000264160 | ENSP00000409279 |
| ENSP00000264161 | ENSP00000276326 |
| ENSP00000264161 | ENSP00000282276 |
| ENSP00000264161 | ENSP00000296802 |
| ENSP00000264161 | ENSP00000302896 |
| ENSP00000264161 | ENSP00000303279 |
| ENSP00000264161 | ENSP00000307567 |
| ENSP00000264161 | ENSP00000317334 |
| ENSP00000264161 | ENSP00000318604 |
| ENSP00000264161 | ENSP00000319977 |
| ENSP00000264161 | ENSP00000326699 |
| ENSP00000264161 | ENSP00000329715 |
| ENSP00000264161 | ENSP00000333934 |
| ENSP00000264161 | ENSP00000340019 |
| ENSP00000264161 | ENSP00000354522 |
| ENSP00000264161 | ENSP00000355890 |
| ENSP00000264161 | ENSP00000358042 |
| ENSP00000264161 | ENSP00000358335 |
| ENSP00000264161 | ENSP00000360327 |
| ENSP00000264161 | ENSP00000361557 |
| ENSP00000264161 | ENSP00000362576 |
| ENSP00000264161 | ENSP00000364035 |
| ENSP00000264161 | ENSP00000364794 |
| ENSP00000264161 | ENSP00000364815 |
| ENSP00000264161 | ENSP00000367923 |
| ENSP00000264161 | ENSP00000368140 |
| ENSP00000264161 | ENSP00000369038 |
| ENSP00000264161 | ENSP00000376946 |
| ENSP00000264161 | ENSP00000379607 |
| ENSP00000264161 | ENSP00000380460 |
| ENSP00000264161 | ENSP00000381891 |
| ENSP00000264161 | ENSP00000391432 |
| ENSP00000264161 | ENSP00000401121 |
| ENSP00000264161 | ENSP00000403359 |
| ENSP00000264161 | ENSP00000415316 |
| ENSP00000264167 | ENSP00000341243 |
| ENSP00000264167 | ENSP00000349016 |

|                 |                 |
|-----------------|-----------------|
| ENSP00000264167 | ENSP00000355607 |
| ENSP00000264169 | ENSP00000265056 |
| ENSP00000264169 | ENSP00000265728 |
| ENSP00000264169 | ENSP00000276326 |
| ENSP00000264169 | ENSP00000297431 |
| ENSP00000264169 | ENSP00000320885 |
| ENSP00000264169 | ENSP00000330343 |
| ENSP00000264169 | ENSP00000331817 |
| ENSP00000264169 | ENSP00000341243 |
| ENSP00000264169 | ENSP00000343701 |
| ENSP00000264169 | ENSP00000344866 |
| ENSP00000264169 | ENSP00000352257 |
| ENSP00000264169 | ENSP00000355153 |
| ENSP00000264169 | ENSP00000360621 |
| ENSP00000264169 | ENSP00000362592 |
| ENSP00000264169 | ENSP00000363021 |
| ENSP00000264169 | ENSP00000366953 |
| ENSP00000264169 | ENSP00000387982 |
| ENSP00000264169 | ENSP00000402084 |
| ENSP00000264170 | ENSP00000314441 |
| ENSP00000264170 | ENSP00000328671 |
| ENSP00000264170 | ENSP00000401508 |
| ENSP00000264183 | ENSP00000264501 |
| ENSP00000264183 | ENSP00000265990 |
| ENSP00000264183 | ENSP00000282841 |
| ENSP00000264183 | ENSP00000283195 |
| ENSP00000264183 | ENSP00000283882 |
| ENSP00000264183 | ENSP00000286428 |
| ENSP00000264183 | ENSP00000300249 |
| ENSP00000264183 | ENSP00000303315 |
| ENSP00000264183 | ENSP00000304593 |
| ENSP00000264183 | ENSP00000306983 |
| ENSP00000264183 | ENSP00000307208 |
| ENSP00000264183 | ENSP00000307684 |
| ENSP00000264183 | ENSP00000310649 |
| ENSP00000264183 | ENSP00000321617 |
| ENSP00000264183 | ENSP00000322242 |
| ENSP00000264183 | ENSP00000323720 |
| ENSP00000264183 | ENSP00000334188 |
| ENSP00000264183 | ENSP00000340896 |
| ENSP00000264183 | ENSP00000347602 |
| ENSP00000264183 | ENSP00000348784 |
| ENSP00000264183 | ENSP00000349213 |
| ENSP00000264183 | ENSP00000353622 |
| ENSP00000264183 | ENSP00000356470 |
| ENSP00000264183 | ENSP00000356989 |

|                 |                 |
|-----------------|-----------------|
| ENSP00000264183 | ENSP00000360473 |
| ENSP00000264183 | ENSP00000362166 |
| ENSP00000264183 | ENSP00000369695 |
| ENSP00000264183 | ENSP00000371888 |
| ENSP00000264183 | ENSP00000373340 |
| ENSP00000264183 | ENSP00000377262 |
| ENSP00000264183 | ENSP00000386759 |
| ENSP00000264183 | ENSP00000392617 |
| ENSP00000264193 | ENSP00000267426 |
| ENSP00000264193 | ENSP00000276072 |
| ENSP00000264193 | ENSP00000283033 |
| ENSP00000264193 | ENSP00000286091 |
| ENSP00000264193 | ENSP00000294168 |
| ENSP00000264193 | ENSP00000297185 |
| ENSP00000264193 | ENSP00000299424 |
| ENSP00000264193 | ENSP00000309595 |
| ENSP00000264193 | ENSP00000318147 |
| ENSP00000264193 | ENSP00000342026 |
| ENSP00000264193 | ENSP00000344537 |
| ENSP00000264193 | ENSP00000354633 |
| ENSP00000264193 | ENSP00000358854 |
| ENSP00000264193 | ENSP00000361998 |
| ENSP00000264193 | ENSP00000362068 |
| ENSP00000264193 | ENSP00000362576 |
| ENSP00000264193 | ENSP00000364815 |
| ENSP00000264193 | ENSP00000366974 |
| ENSP00000264193 | ENSP00000367406 |
| ENSP00000264193 | ENSP00000368646 |
| ENSP00000264193 | ENSP00000401121 |
| ENSP00000264193 | ENSP00000403359 |
| ENSP00000264193 | ENSP00000415316 |
| ENSP00000264193 | ENSP00000417763 |
| ENSP00000264198 | ENSP00000296257 |
| ENSP00000264198 | ENSP00000299138 |
| ENSP00000264198 | ENSP00000360116 |
| ENSP00000264198 | ENSP00000402316 |
| ENSP00000264218 | ENSP00000305877 |
| ENSP00000264220 | ENSP00000291576 |
| ENSP00000264220 | ENSP00000341243 |
| ENSP00000264220 | ENSP00000348577 |
| ENSP00000264220 | ENSP00000357880 |
| ENSP00000264220 | ENSP00000359976 |
| ENSP00000264220 | ENSP00000361965 |
| ENSP00000264220 | ENSP00000363021 |
| ENSP00000264220 | ENSP00000378350 |
| ENSP00000264220 | ENSP00000382595 |

|                 |                 |
|-----------------|-----------------|
| ENSP00000264228 | ENSP00000286621 |
| ENSP00000264230 | ENSP00000264995 |
| ENSP00000264230 | ENSP00000266544 |
| ENSP00000264230 | ENSP00000267425 |
| ENSP00000264230 | ENSP00000287038 |
| ENSP00000264230 | ENSP00000287295 |
| ENSP00000264230 | ENSP00000296411 |
| ENSP00000264230 | ENSP00000296802 |
| ENSP00000264230 | ENSP00000298746 |
| ENSP00000264230 | ENSP00000301364 |
| ENSP00000264230 | ENSP00000301585 |
| ENSP00000264230 | ENSP00000307525 |
| ENSP00000264230 | ENSP00000309830 |
| ENSP00000264230 | ENSP00000310042 |
| ENSP00000264230 | ENSP00000314132 |
| ENSP00000264230 | ENSP00000317992 |
| ENSP00000264230 | ENSP00000322396 |
| ENSP00000264230 | ENSP00000333837 |
| ENSP00000264230 | ENSP00000338862 |
| ENSP00000264230 | ENSP00000339145 |
| ENSP00000264230 | ENSP00000341692 |
| ENSP00000264230 | ENSP00000342181 |
| ENSP00000264230 | ENSP00000346725 |
| ENSP00000264230 | ENSP00000348596 |
| ENSP00000264230 | ENSP00000354040 |
| ENSP00000264230 | ENSP00000358400 |
| ENSP00000264230 | ENSP00000358563 |
| ENSP00000264230 | ENSP00000359345 |
| ENSP00000264230 | ENSP00000359688 |
| ENSP00000264230 | ENSP00000360412 |
| ENSP00000264230 | ENSP00000361982 |
| ENSP00000264230 | ENSP00000363384 |
| ENSP00000264230 | ENSP00000363559 |
| ENSP00000264230 | ENSP00000364037 |
| ENSP00000264230 | ENSP00000364320 |
| ENSP00000264230 | ENSP00000377640 |
| ENSP00000264230 | ENSP00000379888 |
| ENSP00000264230 | ENSP00000380982 |
| ENSP00000264230 | ENSP00000381793 |
| ENSP00000264230 | ENSP00000383402 |
| ENSP00000264230 | ENSP00000384490 |
| ENSP00000264230 | ENSP00000402338 |
| ENSP00000264230 | ENSP00000419740 |
| ENSP00000264233 | ENSP00000265081 |
| ENSP00000264233 | ENSP00000267812 |
| ENSP00000264233 | ENSP00000268206 |

|                 |                 |
|-----------------|-----------------|
| ENSP00000264233 | ENSP00000274712 |
| ENSP00000264233 | ENSP00000275820 |
| ENSP00000264233 | ENSP00000296805 |
| ENSP00000264233 | ENSP00000298746 |
| ENSP00000264233 | ENSP00000300738 |
| ENSP00000264233 | ENSP00000302160 |
| ENSP00000264233 | ENSP00000310448 |
| ENSP00000264233 | ENSP00000315379 |
| ENSP00000264233 | ENSP00000322570 |
| ENSP00000264233 | ENSP00000324122 |
| ENSP00000264233 | ENSP00000331087 |
| ENSP00000264233 | ENSP00000335321 |
| ENSP00000264233 | ENSP00000338788 |
| ENSP00000264233 | ENSP00000343557 |
| ENSP00000264233 | ENSP00000346566 |
| ENSP00000264233 | ENSP00000347232 |
| ENSP00000264233 | ENSP00000351137 |
| ENSP00000264233 | ENSP00000351492 |
| ENSP00000264233 | ENSP00000351697 |
| ENSP00000264233 | ENSP00000357631 |
| ENSP00000264233 | ENSP00000358554 |
| ENSP00000264233 | ENSP00000358563 |
| ENSP00000264233 | ENSP00000358810 |
| ENSP00000264233 | ENSP00000361310 |
| ENSP00000264233 | ENSP00000361982 |
| ENSP00000264233 | ENSP00000362110 |
| ENSP00000264233 | ENSP00000364289 |
| ENSP00000264233 | ENSP00000366557 |
| ENSP00000264233 | ENSP00000367835 |
| ENSP00000264233 | ENSP00000368349 |
| ENSP00000264233 | ENSP00000368565 |
| ENSP00000264233 | ENSP00000370589 |
| ENSP00000264233 | ENSP00000376973 |
| ENSP00000264233 | ENSP00000387006 |
| ENSP00000264233 | ENSP00000393953 |
| ENSP00000264233 | ENSP00000394649 |
| ENSP00000264233 | ENSP00000401566 |
| ENSP00000264233 | ENSP00000406868 |
| ENSP00000264245 | ENSP00000370719 |
| ENSP00000264246 | ENSP00000303939 |
| ENSP00000264246 | ENSP00000319476 |
| ENSP00000264246 | ENSP00000332049 |
| ENSP00000264255 | ENSP00000265462 |
| ENSP00000264255 | ENSP00000286428 |
| ENSP00000264255 | ENSP00000292180 |
| ENSP00000264255 | ENSP00000296577 |

|                 |                 |
|-----------------|-----------------|
| ENSP00000264255 | ENSP00000311343 |
| ENSP00000264255 | ENSP00000312735 |
| ENSP00000264255 | ENSP00000317334 |
| ENSP00000264255 | ENSP00000350512 |
| ENSP00000264255 | ENSP00000357651 |
| ENSP00000264255 | ENSP00000362110 |
| ENSP00000264255 | ENSP00000363734 |
| ENSP00000264255 | ENSP00000372694 |
| ENSP00000264255 | ENSP00000375881 |
| ENSP00000264255 | ENSP00000412319 |
| ENSP00000264255 | ENSP00000415678 |
| ENSP00000264266 | ENSP00000284320 |
| ENSP00000264276 | ENSP00000317955 |
| ENSP00000264276 | ENSP00000348577 |
| ENSP00000264276 | ENSP00000354739 |
| ENSP00000264312 | ENSP00000337396 |
| ENSP00000264313 | ENSP00000346566 |
| ENSP00000264313 | ENSP00000380921 |
| ENSP00000264318 | ENSP00000332258 |
| ENSP00000264335 | ENSP00000264705 |
| ENSP00000264335 | ENSP00000264839 |
| ENSP00000264335 | ENSP00000265727 |
| ENSP00000264335 | ENSP00000265960 |
| ENSP00000264335 | ENSP00000269122 |
| ENSP00000264335 | ENSP00000269397 |
| ENSP00000264335 | ENSP00000281282 |
| ENSP00000264335 | ENSP00000281623 |
| ENSP00000264335 | ENSP00000283928 |
| ENSP00000264335 | ENSP00000284776 |
| ENSP00000264335 | ENSP00000286627 |
| ENSP00000264335 | ENSP00000287038 |
| ENSP00000264335 | ENSP00000287878 |
| ENSP00000264335 | ENSP00000288602 |
| ENSP00000264335 | ENSP00000290429 |
| ENSP00000264335 | ENSP00000292055 |
| ENSP00000264335 | ENSP00000293406 |
| ENSP00000264335 | ENSP00000295756 |
| ENSP00000264335 | ENSP00000296474 |
| ENSP00000264335 | ENSP00000296509 |
| ENSP00000264335 | ENSP00000298552 |
| ENSP00000264335 | ENSP00000298852 |
| ENSP00000264335 | ENSP00000300249 |
| ENSP00000264335 | ENSP00000300574 |
| ENSP00000264335 | ENSP00000300738 |
| ENSP00000264335 | ENSP00000301280 |
| ENSP00000264335 | ENSP00000301740 |

|                 |                 |
|-----------------|-----------------|
| ENSP00000264335 | ENSP00000302239 |
| ENSP00000264335 | ENSP00000303507 |
| ENSP00000264335 | ENSP00000303928 |
| ENSP00000264335 | ENSP00000304350 |
| ENSP00000264335 | ENSP00000306275 |
| ENSP00000264335 | ENSP00000307272 |
| ENSP00000264335 | ENSP00000309103 |
| ENSP00000264335 | ENSP00000310129 |
| ENSP00000264335 | ENSP00000311005 |
| ENSP00000264335 | ENSP00000311430 |
| ENSP00000264335 | ENSP00000311827 |
| ENSP00000264335 | ENSP00000311873 |
| ENSP00000264335 | ENSP00000313059 |
| ENSP00000264335 | ENSP00000322570 |
| ENSP00000264335 | ENSP00000323780 |
| ENSP00000264335 | ENSP00000329380 |
| ENSP00000264335 | ENSP00000332513 |
| ENSP00000264335 | ENSP00000332721 |
| ENSP00000264335 | ENSP00000332931 |
| ENSP00000264335 | ENSP00000337439 |
| ENSP00000264335 | ENSP00000338345 |
| ENSP00000264335 | ENSP00000339186 |
| ENSP00000264335 | ENSP00000339527 |
| ENSP00000264335 | ENSP00000340019 |
| ENSP00000264335 | ENSP00000340237 |
| ENSP00000264335 | ENSP00000343144 |
| ENSP00000264335 | ENSP00000345530 |
| ENSP00000264335 | ENSP00000346067 |
| ENSP00000264335 | ENSP00000347345 |
| ENSP00000264335 | ENSP00000347978 |
| ENSP00000264335 | ENSP00000348157 |
| ENSP00000264335 | ENSP00000348442 |
| ENSP00000264335 | ENSP00000348551 |
| ENSP00000264335 | ENSP00000349959 |
| ENSP00000264335 | ENSP00000350249 |
| ENSP00000264335 | ENSP00000351284 |
| ENSP00000264335 | ENSP00000351908 |
| ENSP00000264335 | ENSP00000352738 |
| ENSP00000264335 | ENSP00000353622 |
| ENSP00000264335 | ENSP00000354497 |
| ENSP00000264335 | ENSP00000354718 |
| ENSP00000264335 | ENSP00000354876 |
| ENSP00000264335 | ENSP00000354916 |
| ENSP00000264335 | ENSP00000354927 |
| ENSP00000264335 | ENSP00000355596 |
| ENSP00000264335 | ENSP00000355884 |



|                 |                 |
|-----------------|-----------------|
| ENSP00000264335 | ENSP00000359531 |
| ENSP00000264335 | ENSP00000359567 |
| ENSP00000264335 | ENSP00000360532 |
| ENSP00000264335 | ENSP00000360621 |
| ENSP00000264335 | ENSP00000362399 |
| ENSP00000264335 | ENSP00000363021 |
| ENSP00000264335 | ENSP00000363433 |
| ENSP00000264335 | ENSP00000364929 |
| ENSP00000264335 | ENSP00000365016 |
| ENSP00000264335 | ENSP00000366863 |
| ENSP00000264335 | ENSP00000367766 |
| ENSP00000264335 | ENSP00000368438 |
| ENSP00000264335 | ENSP00000368976 |
| ENSP00000264335 | ENSP00000371734 |
| ENSP00000264335 | ENSP00000372023 |
| ENSP00000264335 | ENSP00000372857 |
| ENSP00000264335 | ENSP00000377496 |
| ENSP00000264335 | ENSP00000378529 |
| ENSP00000264335 | ENSP00000379607 |
| ENSP00000264335 | ENSP00000381293 |
| ENSP00000264335 | ENSP00000381932 |
| ENSP00000264335 | ENSP00000382177 |
| ENSP00000264335 | ENSP00000382423 |
| ENSP00000264335 | ENSP00000384675 |
| ENSP00000264335 | ENSP00000388731 |
| ENSP00000264335 | ENSP00000395574 |
| ENSP00000264335 | ENSP00000397598 |
| ENSP00000264335 | ENSP00000399863 |
| ENSP00000264335 | ENSP00000405963 |
| ENSP00000264380 | ENSP00000264639 |
| ENSP00000264380 | ENSP00000264705 |
| ENSP00000264380 | ENSP00000265970 |
| ENSP00000264380 | ENSP00000273398 |
| ENSP00000264380 | ENSP00000274680 |
| ENSP00000264380 | ENSP00000278616 |
| ENSP00000264380 | ENSP00000286317 |
| ENSP00000264380 | ENSP00000286428 |
| ENSP00000264380 | ENSP00000288828 |
| ENSP00000264380 | ENSP00000300648 |
| ENSP00000264380 | ENSP00000305682 |
| ENSP00000264380 | ENSP00000317334 |
| ENSP00000264380 | ENSP00000320309 |
| ENSP00000264380 | ENSP00000322957 |
| ENSP00000264380 | ENSP00000323377 |
| ENSP00000264380 | ENSP00000325448 |
| ENSP00000264380 | ENSP00000326921 |

|                 |                 |
|-----------------|-----------------|
| ENSP00000264380 | ENSP00000329558 |
| ENSP00000264380 | ENSP00000331201 |
| ENSP00000264380 | ENSP00000334188 |
| ENSP00000264380 | ENSP00000336842 |
| ENSP00000264380 | ENSP00000338093 |
| ENSP00000264380 | ENSP00000343741 |
| ENSP00000264380 | ENSP00000346022 |
| ENSP00000264380 | ENSP00000347498 |
| ENSP00000264380 | ENSP00000352121 |
| ENSP00000264380 | ENSP00000353904 |
| ENSP00000264380 | ENSP00000354340 |
| ENSP00000264380 | ENSP00000354519 |
| ENSP00000264380 | ENSP00000354522 |
| ENSP00000264380 | ENSP00000354558 |
| ENSP00000264380 | ENSP00000356989 |
| ENSP00000264380 | ENSP00000359067 |
| ENSP00000264380 | ENSP00000360473 |
| ENSP00000264380 | ENSP00000360798 |
| ENSP00000264380 | ENSP00000360992 |
| ENSP00000264380 | ENSP00000361287 |
| ENSP00000264380 | ENSP00000376946 |
| ENSP00000264380 | ENSP00000379500 |
| ENSP00000264380 | ENSP00000382177 |
| ENSP00000264380 | ENSP00000386621 |
| ENSP00000264380 | ENSP00000403852 |
| ENSP00000264389 | ENSP00000267540 |
| ENSP00000264389 | ENSP00000268638 |
| ENSP00000264389 | ENSP00000268717 |
| ENSP00000264389 | ENSP00000270708 |
| ENSP00000264389 | ENSP00000298852 |
| ENSP00000264389 | ENSP00000299259 |
| ENSP00000264389 | ENSP00000301764 |
| ENSP00000264389 | ENSP00000304102 |
| ENSP00000264389 | ENSP00000304822 |
| ENSP00000264389 | ENSP00000306245 |
| ENSP00000264389 | ENSP00000320648 |
| ENSP00000264389 | ENSP00000324444 |
| ENSP00000264389 | ENSP00000345144 |
| ENSP00000264389 | ENSP00000346340 |
| ENSP00000264389 | ENSP00000350512 |
| ENSP00000264389 | ENSP00000355958 |
| ENSP00000264389 | ENSP00000357674 |
| ENSP00000264389 | ENSP00000359206 |
| ENSP00000264389 | ENSP00000362314 |
| ENSP00000264389 | ENSP00000362334 |
| ENSP00000264389 | ENSP00000407401 |

|                 |                 |
|-----------------|-----------------|
| ENSP00000264399 | ENSP00000279230 |
| ENSP00000264399 | ENSP00000280362 |
| ENSP00000264399 | ENSP00000318351 |
| ENSP00000264399 | ENSP00000346725 |
| ENSP00000264399 | ENSP00000353452 |
| ENSP00000264399 | ENSP00000361465 |
| ENSP00000264399 | ENSP00000361650 |
| ENSP00000264399 | ENSP00000365550 |
| ENSP00000264399 | ENSP00000403852 |
| ENSP00000264447 | ENSP00000326261 |
| ENSP00000264447 | ENSP00000329466 |
| ENSP00000264447 | ENSP00000342300 |
| ENSP00000264447 | ENSP00000354848 |
| ENSP00000264447 | ENSP00000360532 |
| ENSP00000264448 | ENSP00000274473 |
| ENSP00000264451 | ENSP00000330343 |
| ENSP00000264451 | ENSP00000350708 |
| ENSP00000264451 | ENSP00000399968 |
| ENSP00000264474 | ENSP00000274030 |
| ENSP00000264474 | ENSP00000301607 |
| ENSP00000264474 | ENSP00000357731 |
| ENSP00000264474 | ENSP00000357753 |
| ENSP00000264474 | ENSP00000379607 |
| ENSP00000264497 | ENSP00000338010 |
| ENSP00000264499 | ENSP00000268057 |
| ENSP00000264499 | ENSP00000295240 |
| ENSP00000264499 | ENSP00000296135 |
| ENSP00000264499 | ENSP00000317334 |
| ENSP00000264499 | ENSP00000319062 |
| ENSP00000264499 | ENSP00000334100 |
| ENSP00000264499 | ENSP00000353701 |
| ENSP00000264499 | ENSP00000370031 |
| ENSP00000264499 | ENSP00000376946 |
| ENSP00000264501 | ENSP00000264515 |
| ENSP00000264501 | ENSP00000265070 |
| ENSP00000264501 | ENSP00000273064 |
| ENSP00000264501 | ENSP00000276416 |
| ENSP00000264501 | ENSP00000283351 |
| ENSP00000264501 | ENSP00000291688 |
| ENSP00000264501 | ENSP00000299626 |
| ENSP00000264501 | ENSP00000304593 |
| ENSP00000264501 | ENSP00000306124 |
| ENSP00000264501 | ENSP00000312244 |
| ENSP00000264501 | ENSP00000319979 |
| ENSP00000264501 | ENSP00000320566 |
| ENSP00000264501 | ENSP00000321711 |

|                 |                 |
|-----------------|-----------------|
| ENSP00000264501 | ENSP00000325677 |
| ENSP00000264501 | ENSP00000326699 |
| ENSP00000264501 | ENSP00000331310 |
| ENSP00000264501 | ENSP00000331719 |
| ENSP00000264501 | ENSP00000334188 |
| ENSP00000264501 | ENSP00000340271 |
| ENSP00000264501 | ENSP00000346809 |
| ENSP00000264501 | ENSP00000347602 |
| ENSP00000264501 | ENSP00000348107 |
| ENSP00000264501 | ENSP00000348602 |
| ENSP00000264501 | ENSP00000349877 |
| ENSP00000264501 | ENSP00000351947 |
| ENSP00000264501 | ENSP00000353622 |
| ENSP00000264501 | ENSP00000354522 |
| ENSP00000264501 | ENSP00000356530 |
| ENSP00000264501 | ENSP00000359518 |
| ENSP00000264501 | ENSP00000359552 |
| ENSP00000264501 | ENSP00000360473 |
| ENSP00000264501 | ENSP00000364929 |
| ENSP00000264501 | ENSP00000374213 |
| ENSP00000264501 | ENSP00000380460 |
| ENSP00000264501 | ENSP00000380793 |
| ENSP00000264501 | ENSP00000401445 |
| ENSP00000264501 | ENSP00000402240 |
| ENSP00000264501 | ENSP00000415203 |
| ENSP00000264515 | ENSP00000265351 |
| ENSP00000264515 | ENSP00000267163 |
| ENSP00000264515 | ENSP00000267197 |
| ENSP00000264515 | ENSP00000271555 |
| ENSP00000264515 | ENSP00000273067 |
| ENSP00000264515 | ENSP00000274140 |
| ENSP00000264515 | ENSP00000283882 |
| ENSP00000264515 | ENSP00000285873 |
| ENSP00000264515 | ENSP00000286317 |
| ENSP00000264515 | ENSP00000287820 |
| ENSP00000264515 | ENSP00000295066 |
| ENSP00000264515 | ENSP00000296490 |
| ENSP00000264515 | ENSP00000296786 |
| ENSP00000264515 | ENSP00000298937 |
| ENSP00000264515 | ENSP00000299601 |
| ENSP00000264515 | ENSP00000301764 |
| ENSP00000264515 | ENSP00000302239 |
| ENSP00000264515 | ENSP00000302790 |
| ENSP00000264515 | ENSP00000303584 |
| ENSP00000264515 | ENSP00000304593 |
| ENSP00000264515 | ENSP00000306983 |

|                 |                 |
|-----------------|-----------------|
| ENSP00000264515 | ENSP00000309141 |
| ENSP00000264515 | ENSP00000309555 |
| ENSP00000264515 | ENSP00000311496 |
| ENSP00000264515 | ENSP00000317087 |
| ENSP00000264515 | ENSP00000317334 |
| ENSP00000264515 | ENSP00000321617 |
| ENSP00000264515 | ENSP00000322242 |
| ENSP00000264515 | ENSP00000322579 |
| ENSP00000264515 | ENSP00000323302 |
| ENSP00000264515 | ENSP00000325326 |
| ENSP00000264515 | ENSP00000325377 |
| ENSP00000264515 | ENSP00000325677 |
| ENSP00000264515 | ENSP00000326519 |
| ENSP00000264515 | ENSP00000327716 |
| ENSP00000264515 | ENSP00000329967 |
| ENSP00000264515 | ENSP00000334130 |
| ENSP00000264515 | ENSP00000337088 |
| ENSP00000264515 | ENSP00000337405 |
| ENSP00000264515 | ENSP00000340766 |
| ENSP00000264515 | ENSP00000340896 |
| ENSP00000264515 | ENSP00000344456 |
| ENSP00000264515 | ENSP00000350967 |
| ENSP00000264515 | ENSP00000351894 |
| ENSP00000264515 | ENSP00000352820 |
| ENSP00000264515 | ENSP00000352821 |
| ENSP00000264515 | ENSP00000353059 |
| ENSP00000264515 | ENSP00000353622 |
| ENSP00000264515 | ENSP00000353793 |
| ENSP00000264515 | ENSP00000355205 |
| ENSP00000264515 | ENSP00000356405 |
| ENSP00000264515 | ENSP00000356989 |
| ENSP00000264515 | ENSP00000357442 |
| ENSP00000264515 | ENSP00000357887 |
| ENSP00000264515 | ENSP00000358064 |
| ENSP00000264515 | ENSP00000360515 |
| ENSP00000264515 | ENSP00000360532 |
| ENSP00000264515 | ENSP00000360621 |
| ENSP00000264515 | ENSP00000362532 |
| ENSP00000264515 | ENSP00000363313 |
| ENSP00000264515 | ENSP00000363779 |
| ENSP00000264515 | ENSP00000363787 |
| ENSP00000264515 | ENSP00000365891 |
| ENSP00000264515 | ENSP00000366953 |
| ENSP00000264515 | ENSP00000366974 |
| ENSP00000264515 | ENSP00000367029 |
| ENSP00000264515 | ENSP00000372699 |

|                 |                 |
|-----------------|-----------------|
| ENSP00000264515 | ENSP00000374213 |
| ENSP00000264515 | ENSP00000374280 |
| ENSP00000264515 | ENSP00000374529 |
| ENSP00000264515 | ENSP00000379217 |
| ENSP00000264515 | ENSP00000380460 |
| ENSP00000264515 | ENSP00000382779 |
| ENSP00000264515 | ENSP00000384048 |
| ENSP00000264515 | ENSP00000384109 |
| ENSP00000264515 | ENSP00000386759 |
| ENSP00000264515 | ENSP00000390475 |
| ENSP00000264515 | ENSP00000396271 |
| ENSP00000264515 | ENSP00000396439 |
| ENSP00000264515 | ENSP00000400572 |
| ENSP00000264515 | ENSP00000401445 |
| ENSP00000264515 | ENSP00000402240 |
| ENSP00000264515 | ENSP00000406293 |
| ENSP00000264515 | ENSP00000412190 |
| ENSP00000264552 | ENSP00000265388 |
| ENSP00000264552 | ENSP00000271843 |
| ENSP00000264552 | ENSP00000281043 |
| ENSP00000264552 | ENSP00000288774 |
| ENSP00000264552 | ENSP00000298585 |
| ENSP00000264552 | ENSP00000300738 |
| ENSP00000264552 | ENSP00000308546 |
| ENSP00000264552 | ENSP00000311010 |
| ENSP00000264552 | ENSP00000311280 |
| ENSP00000264552 | ENSP00000331487 |
| ENSP00000264552 | ENSP00000338413 |
| ENSP00000264552 | ENSP00000339381 |
| ENSP00000264552 | ENSP00000340820 |
| ENSP00000264552 | ENSP00000342755 |
| ENSP00000264552 | ENSP00000343535 |
| ENSP00000264552 | ENSP00000345656 |
| ENSP00000264552 | ENSP00000348632 |
| ENSP00000264552 | ENSP00000352673 |
| ENSP00000264552 | ENSP00000352676 |
| ENSP00000264552 | ENSP00000353375 |
| ENSP00000264552 | ENSP00000353508 |
| ENSP00000264552 | ENSP00000360532 |
| ENSP00000264552 | ENSP00000363089 |
| ENSP00000264552 | ENSP00000378529 |
| ENSP00000264563 | ENSP00000338799 |
| ENSP00000264595 | ENSP00000295897 |
| ENSP00000264595 | ENSP00000349437 |
| ENSP00000264596 | ENSP00000302896 |
| ENSP00000264596 | ENSP00000326981 |

|                 |                 |
|-----------------|-----------------|
| ENSP00000264605 | ENSP00000382177 |
| ENSP00000264607 | ENSP00000273480 |
| ENSP00000264607 | ENSP00000284811 |
| ENSP00000264637 | ENSP00000267622 |
| ENSP00000264637 | ENSP00000268058 |
| ENSP00000264637 | ENSP00000271002 |
| ENSP00000264637 | ENSP00000282892 |
| ENSP00000264637 | ENSP00000290663 |
| ENSP00000264637 | ENSP00000299259 |
| ENSP00000264637 | ENSP00000300651 |
| ENSP00000264637 | ENSP00000313420 |
| ENSP00000264637 | ENSP00000322457 |
| ENSP00000264637 | ENSP00000323880 |
| ENSP00000264637 | ENSP00000325612 |
| ENSP00000264637 | ENSP00000326767 |
| ENSP00000264637 | ENSP00000327213 |
| ENSP00000264637 | ENSP00000341692 |
| ENSP00000264637 | ENSP00000348551 |
| ENSP00000264637 | ENSP00000348610 |
| ENSP00000264637 | ENSP00000351894 |
| ENSP00000264637 | ENSP00000352257 |
| ENSP00000264637 | ENSP00000354633 |
| ENSP00000264637 | ENSP00000354718 |
| ENSP00000264637 | ENSP00000355759 |
| ENSP00000264637 | ENSP00000359531 |
| ENSP00000264637 | ENSP00000363193 |
| ENSP00000264637 | ENSP00000363812 |
| ENSP00000264637 | ENSP00000365877 |
| ENSP00000264637 | ENSP00000367787 |
| ENSP00000264637 | ENSP00000370826 |
| ENSP00000264637 | ENSP00000376611 |
| ENSP00000264637 | ENSP00000378286 |
| ENSP00000264637 | ENSP00000381098 |
| ENSP00000264637 | ENSP00000399968 |
| ENSP00000264638 | ENSP00000300574 |
| ENSP00000264638 | ENSP00000337838 |
| ENSP00000264638 | ENSP00000353154 |
| ENSP00000264638 | ENSP00000367408 |
| ENSP00000264639 | ENSP00000265728 |
| ENSP00000264639 | ENSP00000276326 |
| ENSP00000264639 | ENSP00000288680 |
| ENSP00000264639 | ENSP00000290330 |
| ENSP00000264639 | ENSP00000290541 |
| ENSP00000264639 | ENSP00000290974 |
| ENSP00000264639 | ENSP00000295901 |
| ENSP00000264639 | ENSP00000296543 |

|                 |                 |
|-----------------|-----------------|
| ENSP00000264639 | ENSP00000296786 |
| ENSP00000264639 | ENSP00000298852 |
| ENSP00000264639 | ENSP00000299259 |
| ENSP00000264639 | ENSP00000309474 |
| ENSP00000264639 | ENSP00000310129 |
| ENSP00000264639 | ENSP00000311083 |
| ENSP00000264639 | ENSP00000311665 |
| ENSP00000264639 | ENSP00000319977 |
| ENSP00000264639 | ENSP00000321711 |
| ENSP00000264639 | ENSP00000323663 |
| ENSP00000264639 | ENSP00000325376 |
| ENSP00000264639 | ENSP00000341213 |
| ENSP00000264639 | ENSP00000346022 |
| ENSP00000264639 | ENSP00000346236 |
| ENSP00000264639 | ENSP00000347232 |
| ENSP00000264639 | ENSP00000348442 |
| ENSP00000264639 | ENSP00000350708 |
| ENSP00000264639 | ENSP00000356602 |
| ENSP00000264639 | ENSP00000357980 |
| ENSP00000264639 | ENSP00000360183 |
| ENSP00000264639 | ENSP00000360532 |
| ENSP00000264639 | ENSP00000362334 |
| ENSP00000264639 | ENSP00000362344 |
| ENSP00000264639 | ENSP00000364591 |
| ENSP00000264639 | ENSP00000369497 |
| ENSP00000264639 | ENSP00000376758 |
| ENSP00000264639 | ENSP00000381045 |
| ENSP00000264639 | ENSP00000381237 |
| ENSP00000264639 | ENSP00000382595 |
| ENSP00000264639 | ENSP00000384211 |
| ENSP00000264639 | ENSP00000386212 |
| ENSP00000264639 | ENSP00000396937 |
| ENSP00000264645 | ENSP00000276201 |
| ENSP00000264645 | ENSP00000294785 |
| ENSP00000264645 | ENSP00000345793 |
| ENSP00000264645 | ENSP00000351524 |
| ENSP00000264645 | ENSP00000358799 |
| ENSP00000264645 | ENSP00000360922 |
| ENSP00000264645 | ENSP00000361949 |
| ENSP00000264645 | ENSP00000363745 |
| ENSP00000264645 | ENSP00000366607 |
| ENSP00000264645 | ENSP00000379607 |
| ENSP00000264663 | ENSP00000329466 |
| ENSP00000264663 | ENSP00000349977 |
| ENSP00000264670 | ENSP00000264951 |
| ENSP00000264670 | ENSP00000264995 |



|                 |                 |
|-----------------|-----------------|
| ENSP00000264670 | ENSP00000265245 |
| ENSP00000264670 | ENSP00000265849 |
| ENSP00000264670 | ENSP00000274606 |
| ENSP00000264670 | ENSP00000296930 |
| ENSP00000264670 | ENSP00000297990 |
| ENSP00000264670 | ENSP00000298937 |
| ENSP00000264670 | ENSP00000300648 |
| ENSP00000264670 | ENSP00000302768 |
| ENSP00000264670 | ENSP00000302886 |
| ENSP00000264670 | ENSP00000302896 |
| ENSP00000264670 | ENSP00000309433 |
| ENSP00000264670 | ENSP00000314311 |
| ENSP00000264670 | ENSP00000314441 |
| ENSP00000264670 | ENSP00000316879 |
| ENSP00000264670 | ENSP00000317992 |
| ENSP00000264670 | ENSP00000318195 |
| ENSP00000264670 | ENSP00000322396 |
| ENSP00000264670 | ENSP00000322419 |
| ENSP00000264670 | ENSP00000324122 |
| ENSP00000264670 | ENSP00000328671 |
| ENSP00000264670 | ENSP00000329466 |
| ENSP00000264670 | ENSP00000333934 |
| ENSP00000264670 | ENSP00000334188 |
| ENSP00000264670 | ENSP00000334836 |
| ENSP00000264670 | ENSP00000338573 |
| ENSP00000264670 | ENSP00000338862 |
| ENSP00000264670 | ENSP00000339145 |
| ENSP00000264670 | ENSP00000339795 |
| ENSP00000264670 | ENSP00000342181 |
| ENSP00000264670 | ENSP00000345096 |
| ENSP00000264670 | ENSP00000346725 |
| ENSP00000264670 | ENSP00000354040 |
| ENSP00000264670 | ENSP00000355086 |
| ENSP00000264670 | ENSP00000356290 |
| ENSP00000264670 | ENSP00000356548 |
| ENSP00000264670 | ENSP00000356989 |
| ENSP00000264670 | ENSP00000358812 |
| ENSP00000264670 | ENSP00000359345 |
| ENSP00000264670 | ENSP00000359688 |
| ENSP00000264670 | ENSP00000360412 |
| ENSP00000264670 | ENSP00000362153 |
| ENSP00000264670 | ENSP00000363018 |
| ENSP00000264670 | ENSP00000363559 |
| ENSP00000264670 | ENSP00000363676 |
| ENSP00000264670 | ENSP00000364119 |
| ENSP00000264670 | ENSP00000364320 |

|                 |                 |
|-----------------|-----------------|
| ENSP00000264670 | ENSP00000365806 |
| ENSP00000264670 | ENSP00000366135 |
| ENSP00000264670 | ENSP00000366557 |
| ENSP00000264670 | ENSP00000370589 |
| ENSP00000264670 | ENSP00000370741 |
| ENSP00000264670 | ENSP00000373090 |
| ENSP00000264670 | ENSP00000377640 |
| ENSP00000264670 | ENSP00000380982 |
| ENSP00000264670 | ENSP00000386456 |
| ENSP00000264670 | ENSP00000394290 |
| ENSP00000264670 | ENSP00000401508 |
| ENSP00000264670 | ENSP00000402338 |
| ENSP00000264670 | ENSP00000403576 |
| ENSP00000264670 | ENSP00000409074 |
| ENSP00000264670 | ENSP00000409367 |
| ENSP00000264670 | ENSP00000411162 |
| ENSP00000264670 | ENSP00000420357 |
| ENSP00000264689 | ENSP00000287859 |
| ENSP00000264689 | ENSP00000380349 |
| ENSP00000264690 | ENSP00000265023 |
| ENSP00000264690 | ENSP00000372224 |
| ENSP00000264703 | ENSP00000301788 |
| ENSP00000264705 | ENSP00000264731 |
| ENSP00000264705 | ENSP00000265970 |
| ENSP00000264705 | ENSP00000266095 |
| ENSP00000264705 | ENSP00000266126 |
| ENSP00000264705 | ENSP00000267845 |
| ENSP00000264705 | ENSP00000269122 |
| ENSP00000264705 | ENSP00000275015 |
| ENSP00000264705 | ENSP00000286835 |
| ENSP00000264705 | ENSP00000296255 |
| ENSP00000264705 | ENSP00000305958 |
| ENSP00000264705 | ENSP00000307567 |
| ENSP00000264705 | ENSP00000309830 |
| ENSP00000264705 | ENSP00000311344 |
| ENSP00000264705 | ENSP00000313851 |
| ENSP00000264705 | ENSP00000315925 |
| ENSP00000264705 | ENSP00000317334 |
| ENSP00000264705 | ENSP00000321606 |
| ENSP00000264705 | ENSP00000323856 |
| ENSP00000264705 | ENSP00000325690 |
| ENSP00000264705 | ENSP00000326699 |
| ENSP00000264705 | ENSP00000328671 |
| ENSP00000264705 | ENSP00000330484 |
| ENSP00000264705 | ENSP00000339435 |
| ENSP00000264705 | ENSP00000339484 |

|                 |                 |
|-----------------|-----------------|
| ENSP00000264705 | ENSP00000340019 |
| ENSP00000264705 | ENSP00000343103 |
| ENSP00000264705 | ENSP00000344055 |
| ENSP00000264705 | ENSP00000346067 |
| ENSP00000264705 | ENSP00000347495 |
| ENSP00000264705 | ENSP00000347997 |
| ENSP00000264705 | ENSP00000348708 |
| ENSP00000264705 | ENSP00000350199 |
| ENSP00000264705 | ENSP00000350708 |
| ENSP00000264705 | ENSP00000350928 |
| ENSP00000264705 | ENSP00000354347 |
| ENSP00000264705 | ENSP00000354522 |
| ENSP00000264705 | ENSP00000355890 |
| ENSP00000264705 | ENSP00000356146 |
| ENSP00000264705 | ENSP00000358400 |
| ENSP00000264705 | ENSP00000358423 |
| ENSP00000264705 | ENSP00000359096 |
| ENSP00000264705 | ENSP00000359100 |
| ENSP00000264705 | ENSP00000360268 |
| ENSP00000264705 | ENSP00000360327 |
| ENSP00000264705 | ENSP00000361699 |
| ENSP00000264705 | ENSP00000362298 |
| ENSP00000264705 | ENSP00000363205 |
| ENSP00000264705 | ENSP00000363676 |
| ENSP00000264705 | ENSP00000364119 |
| ENSP00000264705 | ENSP00000364895 |
| ENSP00000264705 | ENSP00000365534 |
| ENSP00000264705 | ENSP00000366249 |
| ENSP00000264705 | ENSP00000366974 |
| ENSP00000264705 | ENSP00000368699 |
| ENSP00000264705 | ENSP00000369162 |
| ENSP00000264705 | ENSP00000369456 |
| ENSP00000264705 | ENSP00000370517 |
| ENSP00000264705 | ENSP00000370589 |
| ENSP00000264705 | ENSP00000370883 |
| ENSP00000264705 | ENSP00000373039 |
| ENSP00000264705 | ENSP00000376946 |
| ENSP00000264705 | ENSP00000377527 |
| ENSP00000264705 | ENSP00000394869 |
| ENSP00000264705 | ENSP00000396152 |
| ENSP00000264705 | ENSP00000408058 |
| ENSP00000264705 | ENSP00000410416 |
| ENSP00000264708 | ENSP00000306100 |
| ENSP00000264709 | ENSP00000267163 |
| ENSP00000264709 | ENSP00000269397 |
| ENSP00000264709 | ENSP00000276893 |

|                 |                 |
|-----------------|-----------------|
| ENSP00000264709 | ENSP00000281043 |
| ENSP00000264709 | ENSP00000300086 |
| ENSP00000264709 | ENSP00000308750 |
| ENSP00000264709 | ENSP00000319169 |
| ENSP00000264709 | ENSP00000327213 |
| ENSP00000264709 | ENSP00000343535 |
| ENSP00000264709 | ENSP00000352516 |
| ENSP00000264709 | ENSP00000355388 |
| ENSP00000264709 | ENSP00000357965 |
| ENSP00000264709 | ENSP00000364895 |
| ENSP00000264709 | ENSP00000365877 |
| ENSP00000264709 | ENSP00000379888 |
| ENSP00000264709 | ENSP00000404658 |
| ENSP00000264709 | ENSP00000417980 |
| ENSP00000264717 | ENSP00000350512 |
| ENSP00000264717 | ENSP00000357965 |
| ENSP00000264718 | ENSP00000265351 |
| ENSP00000264718 | ENSP00000297185 |
| ENSP00000264718 | ENSP00000299853 |
| ENSP00000264718 | ENSP00000301764 |
| ENSP00000264718 | ENSP00000302790 |
| ENSP00000264718 | ENSP00000306123 |
| ENSP00000264718 | ENSP00000307491 |
| ENSP00000264718 | ENSP00000309474 |
| ENSP00000264718 | ENSP00000310129 |
| ENSP00000264718 | ENSP00000312735 |
| ENSP00000264718 | ENSP00000314949 |
| ENSP00000264718 | ENSP00000317334 |
| ENSP00000264718 | ENSP00000322016 |
| ENSP00000264718 | ENSP00000340019 |
| ENSP00000264718 | ENSP00000353698 |
| ENSP00000264718 | ENSP00000363250 |
| ENSP00000264718 | ENSP00000364270 |
| ENSP00000264718 | ENSP00000370616 |
| ENSP00000264718 | ENSP00000372199 |
| ENSP00000264718 | ENSP00000376097 |
| ENSP00000264718 | ENSP00000406888 |
| ENSP00000264720 | ENSP00000267163 |
| ENSP00000264720 | ENSP00000307272 |
| ENSP00000264720 | ENSP00000334564 |
| ENSP00000264720 | ENSP00000348510 |
| ENSP00000264720 | ENSP00000351947 |
| ENSP00000264720 | ENSP00000354558 |
| ENSP00000264720 | ENSP00000360532 |
| ENSP00000264720 | ENSP00000361180 |
| ENSP00000264720 | ENSP00000361219 |

|                 |                 |
|-----------------|-----------------|
| ENSP00000264723 | ENSP00000357484 |
| ENSP00000264731 | ENSP00000265148 |
| ENSP00000264731 | ENSP00000265983 |
| ENSP00000264731 | ENSP00000268699 |
| ENSP00000264731 | ENSP00000281708 |
| ENSP00000264731 | ENSP00000282050 |
| ENSP00000264731 | ENSP00000282441 |
| ENSP00000264731 | ENSP00000285398 |
| ENSP00000264731 | ENSP00000286835 |
| ENSP00000264731 | ENSP00000300231 |
| ENSP00000264731 | ENSP00000301019 |
| ENSP00000264731 | ENSP00000301764 |
| ENSP00000264731 | ENSP00000304102 |
| ENSP00000264731 | ENSP00000304592 |
| ENSP00000264731 | ENSP00000307684 |
| ENSP00000264731 | ENSP00000307858 |
| ENSP00000264731 | ENSP00000310129 |
| ENSP00000264731 | ENSP00000310723 |
| ENSP00000264731 | ENSP00000314556 |
| ENSP00000264731 | ENSP00000317334 |
| ENSP00000264731 | ENSP00000317872 |
| ENSP00000264731 | ENSP00000325690 |
| ENSP00000264731 | ENSP00000326550 |
| ENSP00000264731 | ENSP00000327145 |
| ENSP00000264731 | ENSP00000333934 |
| ENSP00000264731 | ENSP00000335371 |
| ENSP00000264731 | ENSP00000341957 |
| ENSP00000264731 | ENSP00000346067 |
| ENSP00000264731 | ENSP00000347733 |
| ENSP00000264731 | ENSP00000348163 |
| ENSP00000264731 | ENSP00000348708 |
| ENSP00000264731 | ENSP00000350283 |
| ENSP00000264731 | ENSP00000353735 |
| ENSP00000264731 | ENSP00000354218 |
| ENSP00000264731 | ENSP00000354478 |
| ENSP00000264731 | ENSP00000354486 |
| ENSP00000264731 | ENSP00000354739 |
| ENSP00000264731 | ENSP00000355153 |
| ENSP00000264731 | ENSP00000355231 |
| ENSP00000264731 | ENSP00000356379 |
| ENSP00000264731 | ENSP00000356520 |
| ENSP00000264731 | ENSP00000359206 |
| ENSP00000264731 | ENSP00000363745 |
| ENSP00000264731 | ENSP00000363899 |
| ENSP00000264731 | ENSP00000364929 |
| ENSP00000264731 | ENSP00000365439 |

|                 |                 |
|-----------------|-----------------|
| ENSP00000264731 | ENSP00000367265 |
| ENSP00000264731 | ENSP00000371729 |
| ENSP00000264731 | ENSP00000372023 |
| ENSP00000264731 | ENSP00000375730 |
| ENSP00000264731 | ENSP00000376309 |
| ENSP00000264731 | ENSP00000377640 |
| ENSP00000264731 | ENSP00000382834 |
| ENSP00000264731 | ENSP00000391774 |
| ENSP00000264731 | ENSP00000392617 |
| ENSP00000264731 | ENSP00000396876 |
| ENSP00000264731 | ENSP00000417281 |
| ENSP00000264734 | ENSP00000281537 |
| ENSP00000264748 | ENSP00000343785 |
| ENSP00000264748 | ENSP00000363571 |
| ENSP00000264758 | ENSP00000270257 |
| ENSP00000264758 | ENSP00000353622 |
| ENSP00000264758 | ENSP00000361824 |
| ENSP00000264758 | ENSP00000387019 |
| ENSP00000264790 | ENSP00000355153 |
| ENSP00000264818 | ENSP00000270139 |
| ENSP00000264818 | ENSP00000303939 |
| ENSP00000264818 | ENSP00000305133 |
| ENSP00000264818 | ENSP00000315768 |
| ENSP00000264818 | ENSP00000319169 |
| ENSP00000264818 | ENSP00000338799 |
| ENSP00000264818 | ENSP00000339328 |
| ENSP00000264818 | ENSP00000340944 |
| ENSP00000264818 | ENSP00000343957 |
| ENSP00000264818 | ENSP00000350967 |
| ENSP00000264818 | ENSP00000356346 |
| ENSP00000264818 | ENSP00000360730 |
| ENSP00000264818 | ENSP00000365016 |
| ENSP00000264818 | ENSP00000416583 |
| ENSP00000264834 | ENSP00000265963 |
| ENSP00000264834 | ENSP00000267064 |
| ENSP00000264834 | ENSP00000320485 |
| ENSP00000264834 | ENSP00000323967 |
| ENSP00000264834 | ENSP00000334061 |
| ENSP00000264834 | ENSP00000353622 |
| ENSP00000264839 | ENSP00000296452 |
| ENSP00000264839 | ENSP00000353362 |
| ENSP00000264839 | ENSP00000354158 |
| ENSP00000264839 | ENSP00000373600 |
| ENSP00000264839 | ENSP00000380271 |
| ENSP00000264864 | ENSP00000265970 |
| ENSP00000264864 | ENSP00000296154 |

|                 |                 |
|-----------------|-----------------|
| ENSP00000264864 | ENSP00000354782 |
| ENSP00000264864 | ENSP00000365891 |
| ENSP00000264883 | ENSP00000265351 |
| ENSP00000264883 | ENSP00000265388 |
| ENSP00000264883 | ENSP00000269122 |
| ENSP00000264883 | ENSP00000272645 |
| ENSP00000264883 | ENSP00000283195 |
| ENSP00000264883 | ENSP00000285968 |
| ENSP00000264883 | ENSP00000290158 |
| ENSP00000264883 | ENSP00000290231 |
| ENSP00000264883 | ENSP00000291688 |
| ENSP00000264883 | ENSP00000296215 |
| ENSP00000264883 | ENSP00000298937 |
| ENSP00000264883 | ENSP00000301329 |
| ENSP00000264883 | ENSP00000302790 |
| ENSP00000264883 | ENSP00000302886 |
| ENSP00000264883 | ENSP00000305503 |
| ENSP00000264883 | ENSP00000307939 |
| ENSP00000264883 | ENSP00000308622 |
| ENSP00000264883 | ENSP00000310668 |
| ENSP00000264883 | ENSP00000311768 |
| ENSP00000264883 | ENSP00000316032 |
| ENSP00000264883 | ENSP00000331310 |
| ENSP00000264883 | ENSP00000334061 |
| ENSP00000264883 | ENSP00000336712 |
| ENSP00000264883 | ENSP00000343701 |
| ENSP00000264883 | ENSP00000346120 |
| ENSP00000264883 | ENSP00000346453 |
| ENSP00000264883 | ENSP00000350512 |
| ENSP00000264883 | ENSP00000352021 |
| ENSP00000264883 | ENSP00000356548 |
| ENSP00000264883 | ENSP00000360286 |
| ENSP00000264883 | ENSP00000362463 |
| ENSP00000264883 | ENSP00000364293 |
| ENSP00000264883 | ENSP00000371155 |
| ENSP00000264883 | ENSP00000386992 |
| ENSP00000264883 | ENSP00000403536 |
| ENSP00000264883 | ENSP00000404151 |
| ENSP00000264917 | ENSP00000283875 |
| ENSP00000264917 | ENSP00000286835 |
| ENSP00000264917 | ENSP00000294016 |
| ENSP00000264917 | ENSP00000295890 |
| ENSP00000264917 | ENSP00000297338 |
| ENSP00000264917 | ENSP00000344874 |
| ENSP00000264917 | ENSP00000351015 |
| ENSP00000264917 | ENSP00000356146 |

|                 |                 |
|-----------------|-----------------|
| ENSP00000264917 | ENSP00000356405 |
| ENSP00000264917 | ENSP00000356825 |
| ENSP00000264917 | ENSP00000379607 |
| ENSP00000264917 | ENSP00000419361 |
| ENSP00000264926 | ENSP00000265038 |
| ENSP00000264926 | ENSP00000265140 |
| ENSP00000264926 | ENSP00000265433 |
| ENSP00000264926 | ENSP00000265728 |
| ENSP00000264926 | ENSP00000265970 |
| ENSP00000264926 | ENSP00000267430 |
| ENSP00000264926 | ENSP00000268043 |
| ENSP00000264926 | ENSP00000268717 |
| ENSP00000264926 | ENSP00000269214 |
| ENSP00000264926 | ENSP00000278616 |
| ENSP00000264926 | ENSP00000282077 |
| ENSP00000264926 | ENSP00000284811 |
| ENSP00000264926 | ENSP00000285021 |
| ENSP00000264926 | ENSP00000287437 |
| ENSP00000264926 | ENSP00000287647 |
| ENSP00000264926 | ENSP00000295050 |
| ENSP00000264926 | ENSP00000295926 |
| ENSP00000264926 | ENSP00000296257 |
| ENSP00000264926 | ENSP00000296273 |
| ENSP00000264926 | ENSP00000296792 |
| ENSP00000264926 | ENSP00000298139 |
| ENSP00000264926 | ENSP00000301671 |
| ENSP00000264926 | ENSP00000301740 |
| ENSP00000264926 | ENSP00000301764 |
| ENSP00000264926 | ENSP00000302120 |
| ENSP00000264926 | ENSP00000302160 |
| ENSP00000264926 | ENSP00000302955 |
| ENSP00000264926 | ENSP00000306561 |
| ENSP00000264926 | ENSP00000306999 |
| ENSP00000264926 | ENSP00000307491 |
| ENSP00000264926 | ENSP00000307853 |
| ENSP00000264926 | ENSP00000308179 |
| ENSP00000264926 | ENSP00000308351 |
| ENSP00000264926 | ENSP00000308944 |
| ENSP00000264926 | ENSP00000310520 |
| ENSP00000264926 | ENSP00000310842 |
| ENSP00000264926 | ENSP00000311873 |
| ENSP00000264926 | ENSP00000313171 |
| ENSP00000264926 | ENSP00000313420 |
| ENSP00000264926 | ENSP00000314193 |
| ENSP00000264926 | ENSP00000315700 |
| ENSP00000264926 | ENSP00000317334 |



|                 |                 |
|-----------------|-----------------|
| ENSP00000264926 | ENSP00000317636 |
| ENSP00000264926 | ENSP00000318977 |
| ENSP00000264926 | ENSP00000322570 |
| ENSP00000264926 | ENSP00000323439 |
| ENSP00000264926 | ENSP00000323663 |
| ENSP00000264926 | ENSP00000325677 |
| ENSP00000264926 | ENSP00000325863 |
| ENSP00000264926 | ENSP00000327197 |
| ENSP00000264926 | ENSP00000334474 |
| ENSP00000264926 | ENSP00000336868 |
| ENSP00000264926 | ENSP00000340019 |
| ENSP00000264926 | ENSP00000340879 |
| ENSP00000264926 | ENSP00000341382 |
| ENSP00000264926 | ENSP00000342026 |
| ENSP00000264926 | ENSP00000343392 |
| ENSP00000264926 | ENSP00000343741 |
| ENSP00000264926 | ENSP00000343745 |
| ENSP00000264926 | ENSP00000347168 |
| ENSP00000264926 | ENSP00000347232 |
| ENSP00000264926 | ENSP00000347733 |
| ENSP00000264926 | ENSP00000347978 |
| ENSP00000264926 | ENSP00000350767 |
| ENSP00000264926 | ENSP00000351284 |
| ENSP00000264926 | ENSP00000351697 |
| ENSP00000264926 | ENSP00000352121 |
| ENSP00000264926 | ENSP00000353332 |
| ENSP00000264926 | ENSP00000353793 |
| ENSP00000264926 | ENSP00000354558 |
| ENSP00000264926 | ENSP00000354720 |
| ENSP00000264926 | ENSP00000354957 |
| ENSP00000264926 | ENSP00000355028 |
| ENSP00000264926 | ENSP00000355077 |
| ENSP00000264926 | ENSP00000355958 |
| ENSP00000264926 | ENSP00000358019 |
| ENSP00000264926 | ENSP00000358862 |
| ENSP00000264926 | ENSP00000360532 |
| ENSP00000264926 | ENSP00000361310 |
| ENSP00000264926 | ENSP00000361990 |
| ENSP00000264926 | ENSP00000363021 |
| ENSP00000264926 | ENSP00000364270 |
| ENSP00000264926 | ENSP00000364813 |
| ENSP00000264926 | ENSP00000365588 |
| ENSP00000264926 | ENSP00000366974 |
| ENSP00000264926 | ENSP00000367034 |
| ENSP00000264926 | ENSP00000368349 |
| ENSP00000264926 | ENSP00000368438 |

|                 |                 |
|-----------------|-----------------|
| ENSP00000264926 | ENSP00000368646 |
| ENSP00000264926 | ENSP00000369335 |
| ENSP00000264926 | ENSP00000369411 |
| ENSP00000264926 | ENSP00000370150 |
| ENSP00000264926 | ENSP00000370151 |
| ENSP00000264926 | ENSP00000371475 |
| ENSP00000264926 | ENSP00000372023 |
| ENSP00000264926 | ENSP00000372316 |
| ENSP00000264926 | ENSP00000372883 |
| ENSP00000264926 | ENSP00000373060 |
| ENSP00000264926 | ENSP00000374529 |
| ENSP00000264926 | ENSP00000375809 |
| ENSP00000264926 | ENSP00000377655 |
| ENSP00000264926 | ENSP00000380460 |
| ENSP00000264926 | ENSP00000380504 |
| ENSP00000264926 | ENSP00000381657 |
| ENSP00000264926 | ENSP00000382595 |
| ENSP00000264926 | ENSP00000382779 |
| ENSP00000264926 | ENSP00000384048 |
| ENSP00000264926 | ENSP00000386212 |
| ENSP00000264926 | ENSP00000387429 |
| ENSP00000264926 | ENSP00000394791 |
| ENSP00000264926 | ENSP00000396068 |
| ENSP00000264926 | ENSP00000396484 |
| ENSP00000264926 | ENSP00000402515 |
| ENSP00000264926 | ENSP00000402527 |
| ENSP00000264926 | ENSP00000403345 |
| ENSP00000264926 | ENSP00000404318 |
| ENSP00000264926 | ENSP00000406280 |
| ENSP00000264926 | ENSP00000407964 |
| ENSP00000264926 | ENSP00000408994 |
| ENSP00000264926 | ENSP00000409167 |
| ENSP00000264926 | ENSP00000410758 |
| ENSP00000264926 | ENSP00000414006 |
| ENSP00000264926 | ENSP00000414634 |
| ENSP00000264926 | ENSP00000415212 |
| ENSP00000264926 | ENSP00000416511 |
| ENSP00000264932 | ENSP00000297185 |
| ENSP00000264932 | ENSP00000301329 |
| ENSP00000264932 | ENSP00000301585 |
| ENSP00000264932 | ENSP00000301761 |
| ENSP00000264932 | ENSP00000329466 |
| ENSP00000264932 | ENSP00000333667 |
| ENSP00000264932 | ENSP00000340019 |
| ENSP00000264932 | ENSP00000355518 |
| ENSP00000264932 | ENSP00000356953 |

|                 |                 |
|-----------------|-----------------|
| ENSP00000264932 | ENSP00000359211 |
| ENSP00000264932 | ENSP00000364649 |
| ENSP00000264932 | ENSP00000364699 |
| ENSP00000264932 | ENSP00000366482 |
| ENSP00000264932 | ENSP00000379607 |
| ENSP00000264932 | ENSP00000387262 |
| ENSP00000264935 | ENSP00000289431 |
| ENSP00000264935 | ENSP00000327077 |
| ENSP00000264935 | ENSP00000338157 |
| ENSP00000264935 | ENSP00000370410 |
| ENSP00000264951 | ENSP00000265990 |
| ENSP00000264951 | ENSP00000267197 |
| ENSP00000264951 | ENSP00000268533 |
| ENSP00000264951 | ENSP00000268661 |
| ENSP00000264951 | ENSP00000272444 |
| ENSP00000264951 | ENSP00000274311 |
| ENSP00000264951 | ENSP00000276201 |
| ENSP00000264951 | ENSP00000280665 |
| ENSP00000264951 | ENSP00000282884 |
| ENSP00000264951 | ENSP00000285873 |
| ENSP00000264951 | ENSP00000286835 |
| ENSP00000264951 | ENSP00000296328 |
| ENSP00000264951 | ENSP00000296783 |
| ENSP00000264951 | ENSP00000296802 |
| ENSP00000264951 | ENSP00000298746 |
| ENSP00000264951 | ENSP00000298767 |
| ENSP00000264951 | ENSP00000299138 |
| ENSP00000264951 | ENSP00000300146 |
| ENSP00000264951 | ENSP00000300413 |
| ENSP00000264951 | ENSP00000301788 |
| ENSP00000264951 | ENSP00000302160 |
| ENSP00000264951 | ENSP00000302768 |
| ENSP00000264951 | ENSP00000302896 |
| ENSP00000264951 | ENSP00000304593 |
| ENSP00000264951 | ENSP00000305702 |
| ENSP00000264951 | ENSP00000307525 |
| ENSP00000264951 | ENSP00000307863 |
| ENSP00000264951 | ENSP00000310596 |
| ENSP00000264951 | ENSP00000311430 |
| ENSP00000264951 | ENSP00000313350 |
| ENSP00000264951 | ENSP00000314311 |
| ENSP00000264951 | ENSP00000314348 |
| ENSP00000264951 | ENSP00000314441 |
| ENSP00000264951 | ENSP00000314949 |
| ENSP00000264951 | ENSP00000316879 |
| ENSP00000264951 | ENSP00000318195 |

|                 |                 |
|-----------------|-----------------|
| ENSP00000264951 | ENSP00000318604 |
| ENSP00000264951 | ENSP00000319341 |
| ENSP00000264951 | ENSP00000320566 |
| ENSP00000264951 | ENSP00000321711 |
| ENSP00000264951 | ENSP00000323302 |
| ENSP00000264951 | ENSP00000324122 |
| ENSP00000264951 | ENSP00000325376 |
| ENSP00000264951 | ENSP00000326806 |
| ENSP00000264951 | ENSP00000326981 |
| ENSP00000264951 | ENSP00000328464 |
| ENSP00000264951 | ENSP00000328690 |
| ENSP00000264951 | ENSP00000329466 |
| ENSP00000264951 | ENSP00000331817 |
| ENSP00000264951 | ENSP00000334044 |
| ENSP00000264951 | ENSP00000334188 |
| ENSP00000264951 | ENSP00000336927 |
| ENSP00000264951 | ENSP00000337839 |
| ENSP00000264951 | ENSP00000339484 |
| ENSP00000264951 | ENSP00000339503 |
| ENSP00000264951 | ENSP00000340281 |
| ENSP00000264951 | ENSP00000340766 |
| ENSP00000264951 | ENSP00000341743 |
| ENSP00000264951 | ENSP00000344220 |
| ENSP00000264951 | ENSP00000345096 |
| ENSP00000264951 | ENSP00000345917 |
| ENSP00000264951 | ENSP00000347087 |
| ENSP00000264951 | ENSP00000348708 |
| ENSP00000264951 | ENSP00000351596 |
| ENSP00000264951 | ENSP00000351665 |
| ENSP00000264951 | ENSP00000352021 |
| ENSP00000264951 | ENSP00000352820 |
| ENSP00000264951 | ENSP00000353059 |
| ENSP00000264951 | ENSP00000354125 |
| ENSP00000264951 | ENSP00000354340 |
| ENSP00000264951 | ENSP00000354522 |
| ENSP00000264951 | ENSP00000354673 |
| ENSP00000264951 | ENSP00000354972 |
| ENSP00000264951 | ENSP00000355261 |
| ENSP00000264951 | ENSP00000355541 |
| ENSP00000264951 | ENSP00000356104 |
| ENSP00000264951 | ENSP00000356146 |
| ENSP00000264951 | ENSP00000356405 |
| ENSP00000264951 | ENSP00000356579 |
| ENSP00000264951 | ENSP00000356811 |
| ENSP00000264951 | ENSP00000358497 |
| ENSP00000264951 | ENSP00000358563 |

|                 |                 |
|-----------------|-----------------|
| ENSP00000264951 | ENSP00000359345 |
| ENSP00000264951 | ENSP00000359939 |
| ENSP00000264951 | ENSP00000360473 |
| ENSP00000264951 | ENSP00000361076 |
| ENSP00000264951 | ENSP00000361465 |
| ENSP00000264951 | ENSP00000361949 |
| ENSP00000264951 | ENSP00000361982 |
| ENSP00000264951 | ENSP00000362166 |
| ENSP00000264951 | ENSP00000362532 |
| ENSP00000264951 | ENSP00000362744 |
| ENSP00000264951 | ENSP00000362900 |
| ENSP00000264951 | ENSP00000362936 |
| ENSP00000264951 | ENSP00000363313 |
| ENSP00000264951 | ENSP00000363944 |
| ENSP00000264951 | ENSP00000364543 |
| ENSP00000264951 | ENSP00000364813 |
| ENSP00000264951 | ENSP00000365131 |
| ENSP00000264951 | ENSP00000366135 |
| ENSP00000264951 | ENSP00000366249 |
| ENSP00000264951 | ENSP00000366607 |
| ENSP00000264951 | ENSP00000366746 |
| ENSP00000264951 | ENSP00000366953 |
| ENSP00000264951 | ENSP00000368699 |
| ENSP00000264951 | ENSP00000368887 |
| ENSP00000264951 | ENSP00000370589 |
| ENSP00000264951 | ENSP00000370741 |
| ENSP00000264951 | ENSP00000372883 |
| ENSP00000264951 | ENSP00000373039 |
| ENSP00000264951 | ENSP00000373715 |
| ENSP00000264951 | ENSP00000374213 |
| ENSP00000264951 | ENSP00000377148 |
| ENSP00000264951 | ENSP00000378306 |
| ENSP00000264951 | ENSP00000379888 |
| ENSP00000264951 | ENSP00000380251 |
| ENSP00000264951 | ENSP00000380982 |
| ENSP00000264951 | ENSP00000382392 |
| ENSP00000264951 | ENSP00000387170 |
| ENSP00000264951 | ENSP00000387303 |
| ENSP00000264951 | ENSP00000392617 |
| ENSP00000264951 | ENSP00000392859 |
| ENSP00000264951 | ENSP00000396152 |
| ENSP00000264951 | ENSP00000397259 |
| ENSP00000264951 | ENSP00000398597 |
| ENSP00000264951 | ENSP00000402240 |
| ENSP00000264951 | ENSP00000402338 |
| ENSP00000264951 | ENSP00000403345 |

|                 |                 |
|-----------------|-----------------|
| ENSP00000264951 | ENSP00000403852 |
| ENSP00000264951 | ENSP00000406280 |
| ENSP00000264951 | ENSP00000410416 |
| ENSP00000264951 | ENSP00000410758 |
| ENSP00000264951 | ENSP00000414006 |
| ENSP00000264951 | ENSP00000414634 |
| ENSP00000264951 | ENSP00000417229 |
| ENSP00000264951 | ENSP00000419628 |
| ENSP00000264951 | ENSP00000419740 |
| ENSP00000264977 | ENSP00000268459 |
| ENSP00000264977 | ENSP00000294008 |
| ENSP00000264977 | ENSP00000298229 |
| ENSP00000264977 | ENSP00000311344 |
| ENSP00000264977 | ENSP00000335321 |
| ENSP00000264977 | ENSP00000348573 |
| ENSP00000264977 | ENSP00000351885 |
| ENSP00000264977 | ENSP00000355296 |
| ENSP00000264977 | ENSP00000358886 |
| ENSP00000264982 | ENSP00000272139 |
| ENSP00000264982 | ENSP00000309606 |
| ENSP00000264982 | ENSP00000327213 |
| ENSP00000264982 | ENSP00000338157 |
| ENSP00000264982 | ENSP00000343129 |
| ENSP00000264982 | ENSP00000355944 |
| ENSP00000264982 | ENSP00000360464 |
| ENSP00000264982 | ENSP00000377944 |
| ENSP00000264992 | ENSP00000267101 |
| ENSP00000264992 | ENSP00000368755 |
| ENSP00000264995 | ENSP00000265100 |
| ENSP00000264995 | ENSP00000265245 |
| ENSP00000264995 | ENSP00000268206 |
| ENSP00000264995 | ENSP00000268379 |
| ENSP00000264995 | ENSP00000270625 |
| ENSP00000264995 | ENSP00000272418 |
| ENSP00000264995 | ENSP00000272542 |
| ENSP00000264995 | ENSP00000274242 |
| ENSP00000264995 | ENSP00000274606 |
| ENSP00000264995 | ENSP00000274849 |
| ENSP00000264995 | ENSP00000278572 |
| ENSP00000264995 | ENSP00000279242 |
| ENSP00000264995 | ENSP00000287038 |
| ENSP00000264995 | ENSP00000288937 |
| ENSP00000264995 | ENSP00000289371 |
| ENSP00000264995 | ENSP00000294189 |
| ENSP00000264995 | ENSP00000296102 |
| ENSP00000264995 | ENSP00000296411 |

|                 |                 |
|-----------------|-----------------|
| ENSP00000264995 | ENSP00000296577 |
| ENSP00000264995 | ENSP00000296802 |
| ENSP00000264995 | ENSP00000296805 |
| ENSP00000264995 | ENSP00000297908 |
| ENSP00000264995 | ENSP00000297990 |
| ENSP00000264995 | ENSP00000298283 |
| ENSP00000264995 | ENSP00000298746 |
| ENSP00000264995 | ENSP00000300151 |
| ENSP00000264995 | ENSP00000301585 |
| ENSP00000264995 | ENSP00000302886 |
| ENSP00000264995 | ENSP00000302896 |
| ENSP00000264995 | ENSP00000306548 |
| ENSP00000264995 | ENSP00000307525 |
| ENSP00000264995 | ENSP00000307889 |
| ENSP00000264995 | ENSP00000308275 |
| ENSP00000264995 | ENSP00000308897 |
| ENSP00000264995 | ENSP00000309334 |
| ENSP00000264995 | ENSP00000309433 |
| ENSP00000264995 | ENSP00000309830 |
| ENSP00000264995 | ENSP00000311028 |
| ENSP00000264995 | ENSP00000311430 |
| ENSP00000264995 | ENSP00000311648 |
| ENSP00000264995 | ENSP00000312311 |
| ENSP00000264995 | ENSP00000314949 |
| ENSP00000264995 | ENSP00000315017 |
| ENSP00000264995 | ENSP00000317376 |
| ENSP00000264995 | ENSP00000317992 |
| ENSP00000264995 | ENSP00000318374 |
| ENSP00000264995 | ENSP00000318646 |
| ENSP00000264995 | ENSP00000322396 |
| ENSP00000264995 | ENSP00000322419 |
| ENSP00000264995 | ENSP00000323858 |
| ENSP00000264995 | ENSP00000325312 |
| ENSP00000264995 | ENSP00000326981 |
| ENSP00000264995 | ENSP00000332887 |
| ENSP00000264995 | ENSP00000333401 |
| ENSP00000264995 | ENSP00000336702 |
| ENSP00000264995 | ENSP00000338573 |
| ENSP00000264995 | ENSP00000338862 |
| ENSP00000264995 | ENSP00000339095 |
| ENSP00000264995 | ENSP00000339145 |
| ENSP00000264995 | ENSP00000339795 |
| ENSP00000264995 | ENSP00000341082 |
| ENSP00000264995 | ENSP00000341885 |
| ENSP00000264995 | ENSP00000342181 |
| ENSP00000264995 | ENSP00000343392 |

|                 |                 |
|-----------------|-----------------|
| ENSP00000264995 | ENSP00000345096 |
| ENSP00000264995 | ENSP00000345156 |
| ENSP00000264995 | ENSP00000346015 |
| ENSP00000264995 | ENSP00000346022 |
| ENSP00000264995 | ENSP00000346027 |
| ENSP00000264995 | ENSP00000346037 |
| ENSP00000264995 | ENSP00000346050 |
| ENSP00000264995 | ENSP00000346088 |
| ENSP00000264995 | ENSP00000346725 |
| ENSP00000264995 | ENSP00000347087 |
| ENSP00000264995 | ENSP00000348596 |
| ENSP00000264995 | ENSP00000348886 |
| ENSP00000264995 | ENSP00000348965 |
| ENSP00000264995 | ENSP00000354040 |
| ENSP00000264995 | ENSP00000354125 |
| ENSP00000264995 | ENSP00000354525 |
| ENSP00000264995 | ENSP00000354739 |
| ENSP00000264995 | ENSP00000356290 |
| ENSP00000264995 | ENSP00000358563 |
| ENSP00000264995 | ENSP00000358854 |
| ENSP00000264995 | ENSP00000359345 |
| ENSP00000264995 | ENSP00000359688 |
| ENSP00000264995 | ENSP00000359939 |
| ENSP00000264995 | ENSP00000360031 |
| ENSP00000264995 | ENSP00000360286 |
| ENSP00000264995 | ENSP00000360412 |
| ENSP00000264995 | ENSP00000361076 |
| ENSP00000264995 | ENSP00000361465 |
| ENSP00000264995 | ENSP00000361982 |
| ENSP00000264995 | ENSP00000362153 |
| ENSP00000264995 | ENSP00000362744 |
| ENSP00000264995 | ENSP00000363018 |
| ENSP00000264995 | ENSP00000363559 |
| ENSP00000264995 | ENSP00000363676 |
| ENSP00000264995 | ENSP00000364320 |
| ENSP00000264995 | ENSP00000368984 |
| ENSP00000264995 | ENSP00000369757 |
| ENSP00000264995 | ENSP00000369965 |
| ENSP00000264995 | ENSP00000370930 |
| ENSP00000264995 | ENSP00000372093 |
| ENSP00000264995 | ENSP00000373404 |
| ENSP00000264995 | ENSP00000375730 |
| ENSP00000264995 | ENSP00000377486 |
| ENSP00000264995 | ENSP00000377617 |
| ENSP00000264995 | ENSP00000377640 |
| ENSP00000264995 | ENSP00000377865 |



|                 |                 |
|-----------------|-----------------|
| ENSP00000264995 | ENSP00000378160 |
| ENSP00000264995 | ENSP00000379888 |
| ENSP00000264995 | ENSP00000380156 |
| ENSP00000264995 | ENSP00000380982 |
| ENSP00000264995 | ENSP00000386717 |
| ENSP00000264995 | ENSP00000389103 |
| ENSP00000264995 | ENSP00000392859 |
| ENSP00000264995 | ENSP00000393393 |
| ENSP00000264995 | ENSP00000402338 |
| ENSP00000264995 | ENSP00000403817 |
| ENSP00000264995 | ENSP00000414321 |
| ENSP00000264995 | ENSP00000417229 |
| ENSP00000264995 | ENSP00000417602 |
| ENSP00000265000 | ENSP00000301011 |
| ENSP00000265007 | ENSP00000342023 |
| ENSP00000265007 | ENSP00000362068 |
| ENSP00000265007 | ENSP00000364683 |
| ENSP00000265007 | ENSP00000367406 |
| ENSP00000265007 | ENSP00000368976 |
| ENSP00000265016 | ENSP00000339191 |
| ENSP00000265023 | ENSP00000284981 |
| ENSP00000265023 | ENSP00000329380 |
| ENSP00000265023 | ENSP00000339328 |
| ENSP00000265023 | ENSP00000355627 |
| ENSP00000265023 | ENSP00000358106 |
| ENSP00000265023 | ENSP00000379383 |
| ENSP00000265026 | ENSP00000362463 |
| ENSP00000265038 | ENSP00000290349 |
| ENSP00000265038 | ENSP00000290846 |
| ENSP00000265038 | ENSP00000301764 |
| ENSP00000265038 | ENSP00000304102 |
| ENSP00000265038 | ENSP00000314949 |
| ENSP00000265038 | ENSP00000348089 |
| ENSP00000265038 | ENSP00000350512 |
| ENSP00000265038 | ENSP00000351137 |
| ENSP00000265038 | ENSP00000367934 |
| ENSP00000265038 | ENSP00000370125 |
| ENSP00000265038 | ENSP00000384109 |
| ENSP00000265044 | ENSP00000317331 |
| ENSP00000265044 | ENSP00000341213 |
| ENSP00000265044 | ENSP00000343412 |
| ENSP00000265044 | ENSP00000361707 |
| ENSP00000265044 | ENSP00000364188 |
| ENSP00000265044 | ENSP00000365175 |
| ENSP00000265044 | ENSP00000385083 |
| ENSP00000265044 | ENSP00000387477 |

|                 |                 |
|-----------------|-----------------|
| ENSP00000265044 | ENSP00000415363 |
| ENSP00000265052 | ENSP00000300441 |
| ENSP00000265052 | ENSP00000301180 |
| ENSP00000265052 | ENSP00000320646 |
| ENSP00000265052 | ENSP00000348762 |
| ENSP00000265052 | ENSP00000357650 |
| ENSP00000265052 | ENSP00000361667 |
| ENSP00000265056 | ENSP00000265465 |
| ENSP00000265056 | ENSP00000265728 |
| ENSP00000265056 | ENSP00000265758 |
| ENSP00000265056 | ENSP00000265963 |
| ENSP00000265056 | ENSP00000269159 |
| ENSP00000265056 | ENSP00000269701 |
| ENSP00000265056 | ENSP00000273398 |
| ENSP00000265056 | ENSP00000274311 |
| ENSP00000265056 | ENSP00000275053 |
| ENSP00000265056 | ENSP00000276533 |
| ENSP00000265056 | ENSP00000276603 |
| ENSP00000265056 | ENSP00000278412 |
| ENSP00000265056 | ENSP00000278616 |
| ENSP00000265056 | ENSP00000285896 |
| ENSP00000265056 | ENSP00000286428 |
| ENSP00000265056 | ENSP00000290330 |
| ENSP00000265056 | ENSP00000295926 |
| ENSP00000265056 | ENSP00000296509 |
| ENSP00000265056 | ENSP00000297338 |
| ENSP00000265056 | ENSP00000297431 |
| ENSP00000265056 | ENSP00000297873 |
| ENSP00000265056 | ENSP00000300086 |
| ENSP00000265056 | ENSP00000300738 |
| ENSP00000265056 | ENSP00000301019 |
| ENSP00000265056 | ENSP00000302111 |
| ENSP00000265056 | ENSP00000307525 |
| ENSP00000265056 | ENSP00000307900 |
| ENSP00000265056 | ENSP00000310260 |
| ENSP00000265056 | ENSP00000313420 |
| ENSP00000265056 | ENSP00000315379 |
| ENSP00000265056 | ENSP00000315702 |
| ENSP00000265056 | ENSP00000322180 |
| ENSP00000265056 | ENSP00000322570 |
| ENSP00000265056 | ENSP00000323099 |
| ENSP00000265056 | ENSP00000324444 |
| ENSP00000265056 | ENSP00000339109 |
| ENSP00000265056 | ENSP00000339353 |
| ENSP00000265056 | ENSP00000340698 |
| ENSP00000265056 | ENSP00000340879 |

|                 |                 |
|-----------------|-----------------|
| ENSP00000265056 | ENSP00000343741 |
| ENSP00000265056 | ENSP00000346566 |
| ENSP00000265056 | ENSP00000347087 |
| ENSP00000265056 | ENSP00000347978 |
| ENSP00000265056 | ENSP00000348565 |
| ENSP00000265056 | ENSP00000349213 |
| ENSP00000265056 | ENSP00000350491 |
| ENSP00000265056 | ENSP00000351284 |
| ENSP00000265056 | ENSP00000351697 |
| ENSP00000265056 | ENSP00000352522 |
| ENSP00000265056 | ENSP00000353098 |
| ENSP00000265056 | ENSP00000353793 |
| ENSP00000265056 | ENSP00000355011 |
| ENSP00000265056 | ENSP00000355153 |
| ENSP00000265056 | ENSP00000359211 |
| ENSP00000265056 | ENSP00000359531 |
| ENSP00000265056 | ENSP00000359691 |
| ENSP00000265056 | ENSP00000360268 |
| ENSP00000265056 | ENSP00000360412 |
| ENSP00000265056 | ENSP00000360532 |
| ENSP00000265056 | ENSP00000360621 |
| ENSP00000265056 | ENSP00000361076 |
| ENSP00000265056 | ENSP00000362352 |
| ENSP00000265056 | ENSP00000362744 |
| ENSP00000265056 | ENSP00000363021 |
| ENSP00000265056 | ENSP00000364037 |
| ENSP00000265056 | ENSP00000366395 |
| ENSP00000265056 | ENSP00000366974 |
| ENSP00000265056 | ENSP00000368349 |
| ENSP00000265056 | ENSP00000369335 |
| ENSP00000265056 | ENSP00000369716 |
| ENSP00000265056 | ENSP00000370151 |
| ENSP00000265056 | ENSP00000371169 |
| ENSP00000265056 | ENSP00000371475 |
| ENSP00000265056 | ENSP00000372023 |
| ENSP00000265056 | ENSP00000377486 |
| ENSP00000265056 | ENSP00000377747 |
| ENSP00000265056 | ENSP00000386239 |
| ENSP00000265056 | ENSP00000401018 |
| ENSP00000265069 | ENSP00000269385 |
| ENSP00000265069 | ENSP00000306123 |
| ENSP00000265069 | ENSP00000308546 |
| ENSP00000265069 | ENSP00000329466 |
| ENSP00000265069 | ENSP00000333376 |
| ENSP00000265069 | ENSP00000350009 |
| ENSP00000265069 | ENSP00000355011 |

|                 |                 |
|-----------------|-----------------|
| ENSP00000265069 | ENSP00000366607 |
| ENSP00000265069 | ENSP00000379607 |
| ENSP00000265070 | ENSP00000273398 |
| ENSP00000265070 | ENSP00000281187 |
| ENSP00000265070 | ENSP00000325002 |
| ENSP00000265070 | ENSP00000327716 |
| ENSP00000265070 | ENSP00000328079 |
| ENSP00000265070 | ENSP00000329419 |
| ENSP00000265070 | ENSP00000357048 |
| ENSP00000265073 | ENSP00000265354 |
| ENSP00000265073 | ENSP00000276072 |
| ENSP00000265073 | ENSP00000278412 |
| ENSP00000265073 | ENSP00000283875 |
| ENSP00000265073 | ENSP00000286428 |
| ENSP00000265073 | ENSP00000296702 |
| ENSP00000265073 | ENSP00000299543 |
| ENSP00000265073 | ENSP00000299601 |
| ENSP00000265073 | ENSP00000301740 |
| ENSP00000265073 | ENSP00000304593 |
| ENSP00000265073 | ENSP00000310596 |
| ENSP00000265073 | ENSP00000311005 |
| ENSP00000265073 | ENSP00000311816 |
| ENSP00000265073 | ENSP00000312411 |
| ENSP00000265073 | ENSP00000312735 |
| ENSP00000265073 | ENSP00000314949 |
| ENSP00000265073 | ENSP00000320566 |
| ENSP00000265073 | ENSP00000322016 |
| ENSP00000265073 | ENSP00000328720 |
| ENSP00000265073 | ENSP00000329029 |
| ENSP00000265073 | ENSP00000329357 |
| ENSP00000265073 | ENSP00000329933 |
| ENSP00000265073 | ENSP00000331310 |
| ENSP00000265073 | ENSP00000332444 |
| ENSP00000265073 | ENSP00000336842 |
| ENSP00000265073 | ENSP00000336868 |
| ENSP00000265073 | ENSP00000340271 |
| ENSP00000265073 | ENSP00000348107 |
| ENSP00000265073 | ENSP00000348510 |
| ENSP00000265073 | ENSP00000351575 |
| ENSP00000265073 | ENSP00000352738 |
| ENSP00000265073 | ENSP00000353622 |
| ENSP00000265073 | ENSP00000354522 |
| ENSP00000265073 | ENSP00000357907 |
| ENSP00000265073 | ENSP00000359531 |
| ENSP00000265073 | ENSP00000360147 |
| ENSP00000265073 | ENSP00000360464 |

|                 |                 |
|-----------------|-----------------|
| ENSP00000265073 | ENSP00000361180 |
| ENSP00000265073 | ENSP00000361465 |
| ENSP00000265073 | ENSP00000363779 |
| ENSP00000265073 | ENSP00000364929 |
| ENSP00000265073 | ENSP00000366974 |
| ENSP00000265073 | ENSP00000368438 |
| ENSP00000265073 | ENSP00000368801 |
| ENSP00000265073 | ENSP00000368927 |
| ENSP00000265073 | ENSP00000369218 |
| ENSP00000265073 | ENSP00000370105 |
| ENSP00000265073 | ENSP00000370377 |
| ENSP00000265073 | ENSP00000380460 |
| ENSP00000265073 | ENSP00000380504 |
| ENSP00000265073 | ENSP00000383059 |
| ENSP00000265073 | ENSP00000384597 |
| ENSP00000265073 | ENSP00000406293 |
| ENSP00000265073 | ENSP00000420588 |
| ENSP00000265077 | ENSP00000363548 |
| ENSP00000265077 | ENSP00000373614 |
| ENSP00000265077 | ENSP00000384169 |
| ENSP00000265081 | ENSP00000265304 |
| ENSP00000265081 | ENSP00000265849 |
| ENSP00000265081 | ENSP00000267430 |
| ENSP00000265081 | ENSP00000268043 |
| ENSP00000265081 | ENSP00000268124 |
| ENSP00000265081 | ENSP00000285021 |
| ENSP00000265081 | ENSP00000285398 |
| ENSP00000265081 | ENSP00000294008 |
| ENSP00000265081 | ENSP00000300738 |
| ENSP00000265081 | ENSP00000301764 |
| ENSP00000265081 | ENSP00000306561 |
| ENSP00000265081 | ENSP00000307853 |
| ENSP00000265081 | ENSP00000308944 |
| ENSP00000265081 | ENSP00000310520 |
| ENSP00000265081 | ENSP00000311873 |
| ENSP00000265081 | ENSP00000318977 |
| ENSP00000265081 | ENSP00000321239 |
| ENSP00000265081 | ENSP00000321636 |
| ENSP00000265081 | ENSP00000322570 |
| ENSP00000265081 | ENSP00000337127 |
| ENSP00000265081 | ENSP00000341243 |
| ENSP00000265081 | ENSP00000343741 |
| ENSP00000265081 | ENSP00000343745 |
| ENSP00000265081 | ENSP00000347978 |
| ENSP00000265081 | ENSP00000348020 |
| ENSP00000265081 | ENSP00000350283 |

|                 |                 |
|-----------------|-----------------|
| ENSP00000265081 | ENSP00000351284 |
| ENSP00000265081 | ENSP00000351697 |
| ENSP00000265081 | ENSP00000351947 |
| ENSP00000265081 | ENSP00000358478 |
| ENSP00000265081 | ENSP00000358576 |
| ENSP00000265081 | ENSP00000360268 |
| ENSP00000265081 | ENSP00000360310 |
| ENSP00000265081 | ENSP00000361310 |
| ENSP00000265081 | ENSP00000363021 |
| ENSP00000265081 | ENSP00000364270 |
| ENSP00000265081 | ENSP00000368349 |
| ENSP00000265081 | ENSP00000368438 |
| ENSP00000265081 | ENSP00000369335 |
| ENSP00000265081 | ENSP00000370222 |
| ENSP00000265081 | ENSP00000375809 |
| ENSP00000265081 | ENSP00000380504 |
| ENSP00000265085 | ENSP00000268957 |
| ENSP00000265085 | ENSP00000297837 |
| ENSP00000265085 | ENSP00000312042 |
| ENSP00000265085 | ENSP00000362993 |
| ENSP00000265085 | ENSP00000391723 |
| ENSP00000265087 | ENSP00000287295 |
| ENSP00000265087 | ENSP00000353575 |
| ENSP00000265100 | ENSP00000268206 |
| ENSP00000265100 | ENSP00000268616 |
| ENSP00000265100 | ENSP00000268661 |
| ENSP00000265100 | ENSP00000269499 |
| ENSP00000265100 | ENSP00000270625 |
| ENSP00000265100 | ENSP00000274242 |
| ENSP00000265100 | ENSP00000274606 |
| ENSP00000265100 | ENSP00000281141 |
| ENSP00000265100 | ENSP00000287038 |
| ENSP00000265100 | ENSP00000294189 |
| ENSP00000265100 | ENSP00000296805 |
| ENSP00000265100 | ENSP00000297908 |
| ENSP00000265100 | ENSP00000298283 |
| ENSP00000265100 | ENSP00000306548 |
| ENSP00000265100 | ENSP00000307889 |
| ENSP00000265100 | ENSP00000309334 |
| ENSP00000265100 | ENSP00000309830 |
| ENSP00000265100 | ENSP00000311028 |
| ENSP00000265100 | ENSP00000311430 |
| ENSP00000265100 | ENSP00000317376 |
| ENSP00000265100 | ENSP00000318646 |
| ENSP00000265100 | ENSP00000322419 |
| ENSP00000265100 | ENSP00000333837 |

|                 |                 |
|-----------------|-----------------|
| ENSP00000265100 | ENSP00000337839 |
| ENSP00000265100 | ENSP00000339095 |
| ENSP00000265100 | ENSP00000341082 |
| ENSP00000265100 | ENSP00000341538 |
| ENSP00000265100 | ENSP00000343392 |
| ENSP00000265100 | ENSP00000345156 |
| ENSP00000265100 | ENSP00000346015 |
| ENSP00000265100 | ENSP00000346022 |
| ENSP00000265100 | ENSP00000346027 |
| ENSP00000265100 | ENSP00000346037 |
| ENSP00000265100 | ENSP00000346050 |
| ENSP00000265100 | ENSP00000346088 |
| ENSP00000265100 | ENSP00000354739 |
| ENSP00000265100 | ENSP00000359345 |
| ENSP00000265100 | ENSP00000359531 |
| ENSP00000265100 | ENSP00000361076 |
| ENSP00000265100 | ENSP00000362688 |
| ENSP00000265100 | ENSP00000362744 |
| ENSP00000265100 | ENSP00000363018 |
| ENSP00000265100 | ENSP00000363676 |
| ENSP00000265100 | ENSP00000364320 |
| ENSP00000265100 | ENSP00000369757 |
| ENSP00000265100 | ENSP00000375730 |
| ENSP00000265100 | ENSP00000377486 |
| ENSP00000265100 | ENSP00000377640 |
| ENSP00000265100 | ENSP00000377865 |
| ENSP00000265100 | ENSP00000378160 |
| ENSP00000265100 | ENSP00000379607 |
| ENSP00000265100 | ENSP00000380156 |
| ENSP00000265100 | ENSP00000386717 |
| ENSP00000265100 | ENSP00000389103 |
| ENSP00000265100 | ENSP00000391723 |
| ENSP00000265100 | ENSP00000393241 |
| ENSP00000265100 | ENSP00000393393 |
| ENSP00000265100 | ENSP00000402338 |
| ENSP00000265100 | ENSP00000403175 |
| ENSP00000265100 | ENSP00000412583 |
| ENSP00000265100 | ENSP00000414321 |
| ENSP00000265100 | ENSP00000416110 |
| ENSP00000265104 | ENSP00000265148 |
| ENSP00000265104 | ENSP00000276014 |
| ENSP00000265104 | ENSP00000295951 |
| ENSP00000265104 | ENSP00000296509 |
| ENSP00000265104 | ENSP00000300231 |
| ENSP00000265104 | ENSP00000300249 |
| ENSP00000265104 | ENSP00000301332 |

|                 |                 |
|-----------------|-----------------|
| ENSP00000265104 | ENSP00000333950 |
| ENSP00000265104 | ENSP00000347626 |
| ENSP00000265104 | ENSP00000351665 |
| ENSP00000265104 | ENSP00000354158 |
| ENSP00000265104 | ENSP00000355922 |
| ENSP00000265104 | ENSP00000357643 |
| ENSP00000265104 | ENSP00000360310 |
| ENSP00000265104 | ENSP00000366974 |
| ENSP00000265104 | ENSP00000368976 |
| ENSP00000265104 | ENSP00000374566 |
| ENSP00000265104 | ENSP00000377793 |
| ENSP00000265104 | ENSP00000382177 |
| ENSP00000265107 | ENSP00000278174 |
| ENSP00000265107 | ENSP00000304370 |
| ENSP00000265107 | ENSP00000307491 |
| ENSP00000265107 | ENSP00000334148 |
| ENSP00000265132 | ENSP00000295897 |
| ENSP00000265132 | ENSP00000321260 |
| ENSP00000265132 | ENSP00000344460 |
| ENSP00000265132 | ENSP00000346839 |
| ENSP00000265132 | ENSP00000381891 |
| ENSP00000265140 | ENSP00000265728 |
| ENSP00000265140 | ENSP00000276533 |
| ENSP00000265140 | ENSP00000287598 |
| ENSP00000265140 | ENSP00000292475 |
| ENSP00000265140 | ENSP00000296509 |
| ENSP00000265140 | ENSP00000300738 |
| ENSP00000265140 | ENSP00000302530 |
| ENSP00000265140 | ENSP00000305899 |
| ENSP00000265140 | ENSP00000307525 |
| ENSP00000265140 | ENSP00000308944 |
| ENSP00000265140 | ENSP00000313171 |
| ENSP00000265140 | ENSP00000323663 |
| ENSP00000265140 | ENSP00000340879 |
| ENSP00000265140 | ENSP00000349576 |
| ENSP00000265140 | ENSP00000370151 |
| ENSP00000265140 | ENSP00000371475 |
| ENSP00000265140 | ENSP00000372023 |
| ENSP00000265140 | ENSP00000377384 |
| ENSP00000265140 | ENSP00000381657 |
| ENSP00000265140 | ENSP00000401018 |
| ENSP00000265148 | ENSP00000267163 |
| ENSP00000265148 | ENSP00000271452 |
| ENSP00000265148 | ENSP00000271715 |
| ENSP00000265148 | ENSP00000275780 |
| ENSP00000265148 | ENSP00000285116 |



|                 |                 |
|-----------------|-----------------|
| ENSP00000265148 | ENSP00000286428 |
| ENSP00000265148 | ENSP00000287598 |
| ENSP00000265148 | ENSP00000295951 |
| ENSP00000265148 | ENSP00000296509 |
| ENSP00000265148 | ENSP00000297338 |
| ENSP00000265148 | ENSP00000300249 |
| ENSP00000265148 | ENSP00000301019 |
| ENSP00000265148 | ENSP00000301332 |
| ENSP00000265148 | ENSP00000308750 |
| ENSP00000265148 | ENSP00000317714 |
| ENSP00000265148 | ENSP00000322180 |
| ENSP00000265148 | ENSP00000322915 |
| ENSP00000265148 | ENSP00000327009 |
| ENSP00000265148 | ENSP00000332592 |
| ENSP00000265148 | ENSP00000333950 |
| ENSP00000265148 | ENSP00000336587 |
| ENSP00000265148 | ENSP00000345892 |
| ENSP00000265148 | ENSP00000346566 |
| ENSP00000265148 | ENSP00000347719 |
| ENSP00000265148 | ENSP00000348965 |
| ENSP00000265148 | ENSP00000351665 |
| ENSP00000265148 | ENSP00000353793 |
| ENSP00000265148 | ENSP00000355922 |
| ENSP00000265148 | ENSP00000356579 |
| ENSP00000265148 | ENSP00000360473 |
| ENSP00000265148 | ENSP00000363734 |
| ENSP00000265148 | ENSP00000368976 |
| ENSP00000265148 | ENSP00000372023 |
| ENSP00000265148 | ENSP00000372694 |
| ENSP00000265148 | ENSP00000373952 |
| ENSP00000265148 | ENSP00000377793 |
| ENSP00000265148 | ENSP00000378529 |
| ENSP00000265148 | ENSP00000379607 |
| ENSP00000265148 | ENSP00000382562 |
| ENSP00000265148 | ENSP00000402084 |
| ENSP00000265148 | ENSP00000412319 |
| ENSP00000265148 | ENSP00000414402 |
| ENSP00000265148 | ENSP00000415678 |
| ENSP00000265171 | ENSP00000267101 |
| ENSP00000265171 | ENSP00000290974 |
| ENSP00000265171 | ENSP00000312262 |
| ENSP00000265171 | ENSP00000322775 |
| ENSP00000265171 | ENSP00000325421 |
| ENSP00000265171 | ENSP00000334061 |
| ENSP00000265171 | ENSP00000357283 |
| ENSP00000265171 | ENSP00000413625 |

|                 |                 |
|-----------------|-----------------|
| ENSP00000265174 | ENSP00000354916 |
| ENSP00000265175 | ENSP00000265565 |
| ENSP00000265175 | ENSP00000280190 |
| ENSP00000265175 | ENSP00000285243 |
| ENSP00000265175 | ENSP00000294179 |
| ENSP00000265175 | ENSP00000296137 |
| ENSP00000265175 | ENSP00000299596 |
| ENSP00000265175 | ENSP00000304051 |
| ENSP00000265175 | ENSP00000308339 |
| ENSP00000265175 | ENSP00000312778 |
| ENSP00000265175 | ENSP00000316032 |
| ENSP00000265175 | ENSP00000319104 |
| ENSP00000265175 | ENSP00000325612 |
| ENSP00000265175 | ENSP00000327716 |
| ENSP00000265175 | ENSP00000330945 |
| ENSP00000265175 | ENSP00000331817 |
| ENSP00000265175 | ENSP00000344460 |
| ENSP00000265175 | ENSP00000347329 |
| ENSP00000265175 | ENSP00000350708 |
| ENSP00000265175 | ENSP00000352708 |
| ENSP00000265175 | ENSP00000353904 |
| ENSP00000265175 | ENSP00000362948 |
| ENSP00000265175 | ENSP00000371888 |
| ENSP00000265175 | ENSP00000377280 |
| ENSP00000265175 | ENSP00000387170 |
| ENSP00000265175 | ENSP00000391774 |
| ENSP00000265175 | ENSP00000401445 |
| ENSP00000265192 | ENSP00000363676 |
| ENSP00000265195 | ENSP00000265295 |
| ENSP00000265195 | ENSP00000307786 |
| ENSP00000265195 | ENSP00000322706 |
| ENSP00000265195 | ENSP00000337688 |
| ENSP00000265195 | ENSP00000346874 |
| ENSP00000265195 | ENSP00000349131 |
| ENSP00000265195 | ENSP00000356530 |
| ENSP00000265195 | ENSP00000357998 |
| ENSP00000265195 | ENSP00000365943 |
| ENSP00000265195 | ENSP00000386621 |
| ENSP00000265195 | ENSP00000401445 |
| ENSP00000265245 | ENSP00000267425 |
| ENSP00000265245 | ENSP00000268661 |
| ENSP00000265245 | ENSP00000278572 |
| ENSP00000265245 | ENSP00000287038 |
| ENSP00000265245 | ENSP00000296802 |
| ENSP00000265245 | ENSP00000298283 |
| ENSP00000265245 | ENSP00000298746 |

|                 |                 |
|-----------------|-----------------|
| ENSP00000265245 | ENSP00000301364 |
| ENSP00000265245 | ENSP00000302886 |
| ENSP00000265245 | ENSP00000305702 |
| ENSP00000265245 | ENSP00000307525 |
| ENSP00000265245 | ENSP00000309830 |
| ENSP00000265245 | ENSP00000310042 |
| ENSP00000265245 | ENSP00000314348 |
| ENSP00000265245 | ENSP00000317992 |
| ENSP00000265245 | ENSP00000322396 |
| ENSP00000265245 | ENSP00000338862 |
| ENSP00000265245 | ENSP00000339145 |
| ENSP00000265245 | ENSP00000339795 |
| ENSP00000265245 | ENSP00000341885 |
| ENSP00000265245 | ENSP00000346453 |
| ENSP00000265245 | ENSP00000346725 |
| ENSP00000265245 | ENSP00000348596 |
| ENSP00000265245 | ENSP00000354040 |
| ENSP00000265245 | ENSP00000354739 |
| ENSP00000265245 | ENSP00000356290 |
| ENSP00000265245 | ENSP00000356920 |
| ENSP00000265245 | ENSP00000358400 |
| ENSP00000265245 | ENSP00000358563 |
| ENSP00000265245 | ENSP00000359345 |
| ENSP00000265245 | ENSP00000359688 |
| ENSP00000265245 | ENSP00000360412 |
| ENSP00000265245 | ENSP00000361076 |
| ENSP00000265245 | ENSP00000361982 |
| ENSP00000265245 | ENSP00000363018 |
| ENSP00000265245 | ENSP00000363384 |
| ENSP00000265245 | ENSP00000363559 |
| ENSP00000265245 | ENSP00000363676 |
| ENSP00000265245 | ENSP00000364037 |
| ENSP00000265245 | ENSP00000364320 |
| ENSP00000265245 | ENSP00000366519 |
| ENSP00000265245 | ENSP00000377640 |
| ENSP00000265245 | ENSP00000379888 |
| ENSP00000265245 | ENSP00000380156 |
| ENSP00000265245 | ENSP00000380982 |
| ENSP00000265245 | ENSP00000382392 |
| ENSP00000265245 | ENSP00000388464 |
| ENSP00000265245 | ENSP00000389103 |
| ENSP00000265245 | ENSP00000402338 |
| ENSP00000265245 | ENSP00000419740 |
| ENSP00000265260 | ENSP00000276893 |
| ENSP00000265260 | ENSP00000300086 |
| ENSP00000265271 | ENSP00000315859 |

|                 |                 |
|-----------------|-----------------|
| ENSP00000265276 | ENSP00000317177 |
| ENSP00000265276 | ENSP00000342793 |
| ENSP00000265276 | ENSP00000349078 |
| ENSP00000265295 | ENSP00000274695 |
| ENSP00000265295 | ENSP00000311344 |
| ENSP00000265295 | ENSP00000357998 |
| ENSP00000265295 | ENSP00000363205 |
| ENSP00000265295 | ENSP00000370607 |
| ENSP00000265295 | ENSP00000370719 |
| ENSP00000265295 | ENSP00000374328 |
| ENSP00000265304 | ENSP00000265562 |
| ENSP00000265304 | ENSP00000265806 |
| ENSP00000265304 | ENSP00000265881 |
| ENSP00000265304 | ENSP00000267430 |
| ENSP00000265304 | ENSP00000267845 |
| ENSP00000265304 | ENSP00000268124 |
| ENSP00000265304 | ENSP00000294339 |
| ENSP00000265304 | ENSP00000296509 |
| ENSP00000265304 | ENSP00000298139 |
| ENSP00000265304 | ENSP00000298999 |
| ENSP00000265304 | ENSP00000301329 |
| ENSP00000265304 | ENSP00000301364 |
| ENSP00000265304 | ENSP00000301585 |
| ENSP00000265304 | ENSP00000303434 |
| ENSP00000265304 | ENSP00000306561 |
| ENSP00000265304 | ENSP00000307387 |
| ENSP00000265304 | ENSP00000311083 |
| ENSP00000265304 | ENSP00000313350 |
| ENSP00000265304 | ENSP00000317636 |
| ENSP00000265304 | ENSP00000321636 |
| ENSP00000265304 | ENSP00000329466 |
| ENSP00000265304 | ENSP00000331310 |
| ENSP00000265304 | ENSP00000332721 |
| ENSP00000265304 | ENSP00000341243 |
| ENSP00000265304 | ENSP00000343526 |
| ENSP00000265304 | ENSP00000343745 |
| ENSP00000265304 | ENSP00000347232 |
| ENSP00000265304 | ENSP00000349078 |
| ENSP00000265304 | ENSP00000350928 |
| ENSP00000265304 | ENSP00000351284 |
| ENSP00000265304 | ENSP00000358854 |
| ENSP00000265304 | ENSP00000361465 |
| ENSP00000265304 | ENSP00000362298 |
| ENSP00000265304 | ENSP00000362306 |
| ENSP00000265304 | ENSP00000362463 |
| ENSP00000265304 | ENSP00000363021 |

|                 |                 |
|-----------------|-----------------|
| ENSP00000265304 | ENSP00000364126 |
| ENSP00000265304 | ENSP00000379607 |
| ENSP00000265304 | ENSP00000392466 |
| ENSP00000265304 | ENSP00000394649 |
| ENSP00000265304 | ENSP00000396704 |
| ENSP00000265304 | ENSP00000406868 |
| ENSP00000265304 | ENSP00000407047 |
| ENSP00000265316 | ENSP00000269216 |
| ENSP00000265316 | ENSP00000314733 |
| ENSP00000265316 | ENSP00000346206 |
| ENSP00000265316 | ENSP00000359526 |
| ENSP00000265316 | ENSP00000372722 |
| ENSP00000265316 | ENSP00000381293 |
| ENSP00000265316 | ENSP00000401149 |
| ENSP00000265316 | ENSP00000402316 |
| ENSP00000265316 | ENSP00000405356 |
| ENSP00000265316 | ENSP00000413080 |
| ENSP00000265316 | ENSP00000415660 |
| ENSP00000265334 | ENSP00000358478 |
| ENSP00000265343 | ENSP00000267101 |
| ENSP00000265343 | ENSP00000288602 |
| ENSP00000265343 | ENSP00000305689 |
| ENSP00000265343 | ENSP00000311005 |
| ENSP00000265343 | ENSP00000337340 |
| ENSP00000265343 | ENSP00000344456 |
| ENSP00000265343 | ENSP00000352121 |
| ENSP00000265343 | ENSP00000369695 |
| ENSP00000265343 | ENSP00000380054 |
| ENSP00000265350 | ENSP00000267064 |
| ENSP00000265350 | ENSP00000268711 |
| ENSP00000265350 | ENSP00000282007 |
| ENSP00000265350 | ENSP00000286317 |
| ENSP00000265350 | ENSP00000290663 |
| ENSP00000265350 | ENSP00000292035 |
| ENSP00000265350 | ENSP00000293777 |
| ENSP00000265350 | ENSP00000297347 |
| ENSP00000265350 | ENSP00000300651 |
| ENSP00000265350 | ENSP00000323720 |
| ENSP00000265350 | ENSP00000325612 |
| ENSP00000265350 | ENSP00000326128 |
| ENSP00000265350 | ENSP00000326767 |
| ENSP00000265350 | ENSP00000337340 |
| ENSP00000265350 | ENSP00000342343 |
| ENSP00000265350 | ENSP00000357907 |
| ENSP00000265350 | ENSP00000359206 |
| ENSP00000265350 | ENSP00000362948 |

|                 |                 |
|-----------------|-----------------|
| ENSP00000265350 | ENSP00000363193 |
| ENSP00000265350 | ENSP00000369162 |
| ENSP00000265350 | ENSP00000381216 |
| ENSP00000265350 | ENSP00000384048 |
| ENSP00000265350 | ENSP00000391774 |
| ENSP00000265350 | ENSP00000392617 |
| ENSP00000265350 | ENSP00000418734 |
| ENSP00000265351 | ENSP00000267425 |
| ENSP00000265351 | ENSP00000270176 |
| ENSP00000265351 | ENSP00000275730 |
| ENSP00000265351 | ENSP00000283109 |
| ENSP00000265351 | ENSP00000283195 |
| ENSP00000265351 | ENSP00000285873 |
| ENSP00000265351 | ENSP00000290231 |
| ENSP00000265351 | ENSP00000291688 |
| ENSP00000265351 | ENSP00000295989 |
| ENSP00000265351 | ENSP00000296786 |
| ENSP00000265351 | ENSP00000301364 |
| ENSP00000265351 | ENSP00000301838 |
| ENSP00000265351 | ENSP00000302886 |
| ENSP00000265351 | ENSP00000310649 |
| ENSP00000265351 | ENSP00000310668 |
| ENSP00000265351 | ENSP00000311135 |
| ENSP00000265351 | ENSP00000312735 |
| ENSP00000265351 | ENSP00000314004 |
| ENSP00000265351 | ENSP00000315791 |
| ENSP00000265351 | ENSP00000316032 |
| ENSP00000265351 | ENSP00000318195 |
| ENSP00000265351 | ENSP00000318604 |
| ENSP00000265351 | ENSP00000329357 |
| ENSP00000265351 | ENSP00000329466 |
| ENSP00000265351 | ENSP00000336842 |
| ENSP00000265351 | ENSP00000337405 |
| ENSP00000265351 | ENSP00000341551 |
| ENSP00000265351 | ENSP00000346453 |
| ENSP00000265351 | ENSP00000348577 |
| ENSP00000265351 | ENSP00000350869 |
| ENSP00000265351 | ENSP00000352400 |
| ENSP00000265351 | ENSP00000354720 |
| ENSP00000265351 | ENSP00000354742 |
| ENSP00000265351 | ENSP00000354916 |
| ENSP00000265351 | ENSP00000355884 |
| ENSP00000265351 | ENSP00000355890 |
| ENSP00000265351 | ENSP00000356405 |
| ENSP00000265351 | ENSP00000356548 |
| ENSP00000265351 | ENSP00000356744 |

|                 |                 |
|-----------------|-----------------|
| ENSP00000265351 | ENSP00000357907 |
| ENSP00000265351 | ENSP00000359000 |
| ENSP00000265351 | ENSP00000360532 |
| ENSP00000265351 | ENSP00000361186 |
| ENSP00000265351 | ENSP00000361287 |
| ENSP00000265351 | ENSP00000364293 |
| ENSP00000265351 | ENSP00000371155 |
| ENSP00000265351 | ENSP00000373715 |
| ENSP00000265351 | ENSP00000378529 |
| ENSP00000265351 | ENSP00000381567 |
| ENSP00000265351 | ENSP00000384302 |
| ENSP00000265351 | ENSP00000386918 |
| ENSP00000265351 | ENSP00000386992 |
| ENSP00000265351 | ENSP00000404121 |
| ENSP00000265354 | ENSP00000265990 |
| ENSP00000265354 | ENSP00000267064 |
| ENSP00000265354 | ENSP00000267101 |
| ENSP00000265354 | ENSP00000268058 |
| ENSP00000265354 | ENSP00000270861 |
| ENSP00000265354 | ENSP00000277541 |
| ENSP00000265354 | ENSP00000278412 |
| ENSP00000265354 | ENSP00000281437 |
| ENSP00000265354 | ENSP00000294168 |
| ENSP00000265354 | ENSP00000295025 |
| ENSP00000265354 | ENSP00000296839 |
| ENSP00000265354 | ENSP00000302501 |
| ENSP00000265354 | ENSP00000305422 |
| ENSP00000265354 | ENSP00000305502 |
| ENSP00000265354 | ENSP00000307208 |
| ENSP00000265354 | ENSP00000311005 |
| ENSP00000265354 | ENSP00000313420 |
| ENSP00000265354 | ENSP00000320461 |
| ENSP00000265354 | ENSP00000323780 |
| ENSP00000265354 | ENSP00000326296 |
| ENSP00000265354 | ENSP00000326366 |
| ENSP00000265354 | ENSP00000327959 |
| ENSP00000265354 | ENSP00000328720 |
| ENSP00000265354 | ENSP00000329357 |
| ENSP00000265354 | ENSP00000331608 |
| ENSP00000265354 | ENSP00000339004 |
| ENSP00000265354 | ENSP00000339086 |
| ENSP00000265354 | ENSP00000339527 |
| ENSP00000265354 | ENSP00000340944 |
| ENSP00000265354 | ENSP00000341324 |
| ENSP00000265354 | ENSP00000342307 |
| ENSP00000265354 | ENSP00000342828 |

|                 |                 |
|-----------------|-----------------|
| ENSP00000265354 | ENSP00000344537 |
| ENSP00000265354 | ENSP00000344666 |
| ENSP00000265354 | ENSP00000345702 |
| ENSP00000265354 | ENSP00000347168 |
| ENSP00000265354 | ENSP00000347733 |
| ENSP00000265354 | ENSP00000348551 |
| ENSP00000265354 | ENSP00000349213 |
| ENSP00000265354 | ENSP00000350681 |
| ENSP00000265354 | ENSP00000350767 |
| ENSP00000265354 | ENSP00000351894 |
| ENSP00000265354 | ENSP00000354927 |
| ENSP00000265354 | ENSP00000361064 |
| ENSP00000265354 | ENSP00000361998 |
| ENSP00000265354 | ENSP00000362717 |
| ENSP00000265354 | ENSP00000362824 |
| ENSP00000265354 | ENSP00000363046 |
| ENSP00000265354 | ENSP00000364946 |
| ENSP00000265354 | ENSP00000366534 |
| ENSP00000265354 | ENSP00000366974 |
| ENSP00000265354 | ENSP00000367034 |
| ENSP00000265354 | ENSP00000367972 |
| ENSP00000265354 | ENSP00000370256 |
| ENSP00000265354 | ENSP00000377969 |
| ENSP00000265354 | ENSP00000378132 |
| ENSP00000265354 | ENSP00000379678 |
| ENSP00000265354 | ENSP00000382423 |
| ENSP00000265354 | ENSP00000384675 |
| ENSP00000265354 | ENSP00000386200 |
| ENSP00000265372 | ENSP00000281437 |
| ENSP00000265372 | ENSP00000306245 |
| ENSP00000265372 | ENSP00000310036 |
| ENSP00000265372 | ENSP00000329102 |
| ENSP00000265372 | ENSP00000329357 |
| ENSP00000265372 | ENSP00000343023 |
| ENSP00000265372 | ENSP00000345702 |
| ENSP00000265372 | ENSP00000371897 |
| ENSP00000265372 | ENSP00000377384 |
| ENSP00000265372 | ENSP00000394394 |
| ENSP00000265381 | ENSP00000277541 |
| ENSP00000265381 | ENSP00000284981 |
| ENSP00000265381 | ENSP00000293662 |
| ENSP00000265381 | ENSP00000326366 |
| ENSP00000265381 | ENSP00000345731 |
| ENSP00000265381 | ENSP00000362399 |
| ENSP00000265381 | ENSP00000363163 |
| ENSP00000265381 | ENSP00000367408 |



|                 |                 |
|-----------------|-----------------|
| ENSP00000265381 | ENSP00000370410 |
| ENSP00000265381 | ENSP00000380054 |
| ENSP00000265388 | ENSP00000283290 |
| ENSP00000265388 | ENSP00000290231 |
| ENSP00000265388 | ENSP00000312370 |
| ENSP00000265388 | ENSP00000316032 |
| ENSP00000265388 | ENSP00000336712 |
| ENSP00000265388 | ENSP00000341213 |
| ENSP00000265388 | ENSP00000352400 |
| ENSP00000265388 | ENSP00000353622 |
| ENSP00000265388 | ENSP00000362820 |
| ENSP00000265388 | ENSP00000362900 |
| ENSP00000265388 | ENSP00000369335 |
| ENSP00000265388 | ENSP00000377262 |
| ENSP00000265388 | ENSP00000381863 |
| ENSP00000265388 | ENSP00000416959 |
| ENSP00000265433 | ENSP00000269385 |
| ENSP00000265433 | ENSP00000274255 |
| ENSP00000265433 | ENSP00000276603 |
| ENSP00000265433 | ENSP00000278616 |
| ENSP00000265433 | ENSP00000286800 |
| ENSP00000265433 | ENSP00000287647 |
| ENSP00000265433 | ENSP00000298139 |
| ENSP00000265433 | ENSP00000310966 |
| ENSP00000265433 | ENSP00000313420 |
| ENSP00000265433 | ENSP00000317636 |
| ENSP00000265433 | ENSP00000323099 |
| ENSP00000265433 | ENSP00000325863 |
| ENSP00000265433 | ENSP00000342011 |
| ENSP00000265433 | ENSP00000343741 |
| ENSP00000265433 | ENSP00000347232 |
| ENSP00000265433 | ENSP00000350283 |
| ENSP00000265433 | ENSP00000350359 |
| ENSP00000265433 | ENSP00000355759 |
| ENSP00000265433 | ENSP00000360532 |
| ENSP00000265433 | ENSP00000362578 |
| ENSP00000265433 | ENSP00000365588 |
| ENSP00000265433 | ENSP00000367527 |
| ENSP00000265433 | ENSP00000367787 |
| ENSP00000265433 | ENSP00000368438 |
| ENSP00000265433 | ENSP00000371475 |
| ENSP00000265433 | ENSP00000372023 |
| ENSP00000265433 | ENSP00000373060 |
| ENSP00000265433 | ENSP00000384048 |
| ENSP00000265433 | ENSP00000409167 |
| ENSP00000265433 | ENSP00000417281 |

|                 |                 |
|-----------------|-----------------|
| ENSP00000265437 | ENSP00000357674 |
| ENSP00000265459 | ENSP00000363163 |
| ENSP00000265459 | ENSP00000367408 |
| ENSP00000265459 | ENSP00000383623 |
| ENSP00000265462 | ENSP00000268483 |
| ENSP00000265462 | ENSP00000272227 |
| ENSP00000265462 | ENSP00000282541 |
| ENSP00000265462 | ENSP00000283033 |
| ENSP00000265462 | ENSP00000286091 |
| ENSP00000265462 | ENSP00000299608 |
| ENSP00000265462 | ENSP00000301585 |
| ENSP00000265462 | ENSP00000304908 |
| ENSP00000265462 | ENSP00000305465 |
| ENSP00000265462 | ENSP00000311083 |
| ENSP00000265462 | ENSP00000312735 |
| ENSP00000265462 | ENSP00000323313 |
| ENSP00000265462 | ENSP00000330836 |
| ENSP00000265462 | ENSP00000334044 |
| ENSP00000265462 | ENSP00000337443 |
| ENSP00000265462 | ENSP00000339484 |
| ENSP00000265462 | ENSP00000341947 |
| ENSP00000265462 | ENSP00000342026 |
| ENSP00000265462 | ENSP00000352408 |
| ENSP00000265462 | ENSP00000356574 |
| ENSP00000265462 | ENSP00000358307 |
| ENSP00000265462 | ENSP00000364320 |
| ENSP00000265462 | ENSP00000366249 |
| ENSP00000265462 | ENSP00000368646 |
| ENSP00000265462 | ENSP00000368699 |
| ENSP00000265462 | ENSP00000371388 |
| ENSP00000265462 | ENSP00000373039 |
| ENSP00000265462 | ENSP00000373477 |
| ENSP00000265462 | ENSP00000379607 |
| ENSP00000265462 | ENSP00000396152 |
| ENSP00000265462 | ENSP00000410416 |
| ENSP00000265462 | ENSP00000412922 |
| ENSP00000265465 | ENSP00000268043 |
| ENSP00000265465 | ENSP00000270225 |
| ENSP00000265465 | ENSP00000276533 |
| ENSP00000265465 | ENSP00000278412 |
| ENSP00000265465 | ENSP00000285896 |
| ENSP00000265465 | ENSP00000296273 |
| ENSP00000265465 | ENSP00000298139 |
| ENSP00000265465 | ENSP00000300245 |
| ENSP00000265465 | ENSP00000310557 |
| ENSP00000265465 | ENSP00000312870 |

|                 |                 |
|-----------------|-----------------|
| ENSP00000265465 | ENSP00000313171 |
| ENSP00000265465 | ENSP00000318977 |
| ENSP00000265465 | ENSP00000328023 |
| ENSP00000265465 | ENSP00000330343 |
| ENSP00000265465 | ENSP00000331907 |
| ENSP00000265465 | ENSP00000334061 |
| ENSP00000265465 | ENSP00000347232 |
| ENSP00000265465 | ENSP00000350491 |
| ENSP00000265465 | ENSP00000353793 |
| ENSP00000265465 | ENSP00000355759 |
| ENSP00000265465 | ENSP00000356290 |
| ENSP00000265465 | ENSP00000360286 |
| ENSP00000265465 | ENSP00000360621 |
| ENSP00000265465 | ENSP00000368349 |
| ENSP00000265465 | ENSP00000369411 |
| ENSP00000265465 | ENSP00000369757 |
| ENSP00000265465 | ENSP00000370151 |
| ENSP00000265465 | ENSP00000373715 |
| ENSP00000265465 | ENSP00000377617 |
| ENSP00000265465 | ENSP00000380504 |
| ENSP00000265517 | ENSP00000299767 |
| ENSP00000265537 | ENSP00000277865 |
| ENSP00000265537 | ENSP00000296411 |
| ENSP00000265537 | ENSP00000300648 |
| ENSP00000265537 | ENSP00000302886 |
| ENSP00000265537 | ENSP00000307684 |
| ENSP00000265537 | ENSP00000313603 |
| ENSP00000265537 | ENSP00000325312 |
| ENSP00000265537 | ENSP00000354522 |
| ENSP00000265537 | ENSP00000354554 |
| ENSP00000265537 | ENSP00000355471 |
| ENSP00000265537 | ENSP00000355890 |
| ENSP00000265537 | ENSP00000356134 |
| ENSP00000265537 | ENSP00000356811 |
| ENSP00000265537 | ENSP00000360327 |
| ENSP00000265537 | ENSP00000360515 |
| ENSP00000265537 | ENSP00000364986 |
| ENSP00000265537 | ENSP00000370741 |
| ENSP00000265537 | ENSP00000373082 |
| ENSP00000265537 | ENSP00000380460 |
| ENSP00000265537 | ENSP00000389065 |
| ENSP00000265537 | ENSP00000411327 |
| ENSP00000265537 | ENSP00000412553 |
| ENSP00000265537 | ENSP00000413319 |
| ENSP00000265537 | ENSP00000414373 |
| ENSP00000265562 | ENSP00000280362 |

|                 |                 |
|-----------------|-----------------|
| ENSP00000265562 | ENSP00000286835 |
| ENSP00000265562 | ENSP00000299601 |
| ENSP00000265562 | ENSP00000300413 |
| ENSP00000265562 | ENSP00000302160 |
| ENSP00000265562 | ENSP00000302239 |
| ENSP00000265562 | ENSP00000307387 |
| ENSP00000265562 | ENSP00000310596 |
| ENSP00000265562 | ENSP00000311200 |
| ENSP00000265562 | ENSP00000319341 |
| ENSP00000265562 | ENSP00000331201 |
| ENSP00000265562 | ENSP00000339186 |
| ENSP00000265562 | ENSP00000341189 |
| ENSP00000265562 | ENSP00000345530 |
| ENSP00000265562 | ENSP00000353701 |
| ENSP00000265562 | ENSP00000354673 |
| ENSP00000265562 | ENSP00000354927 |
| ENSP00000265562 | ENSP00000356146 |
| ENSP00000265562 | ENSP00000365005 |
| ENSP00000265562 | ENSP00000366565 |
| ENSP00000265562 | ENSP00000375986 |
| ENSP00000265562 | ENSP00000379228 |
| ENSP00000265562 | ENSP00000402084 |
| ENSP00000265562 | ENSP00000417764 |
| ENSP00000265565 | ENSP00000304051 |
| ENSP00000265565 | ENSP00000344741 |
| ENSP00000265643 | ENSP00000308733 |
| ENSP00000265651 | ENSP00000300107 |
| ENSP00000265689 | ENSP00000274255 |
| ENSP00000265689 | ENSP00000303554 |
| ENSP00000265689 | ENSP00000314615 |
| ENSP00000265689 | ENSP00000317177 |
| ENSP00000265689 | ENSP00000320488 |
| ENSP00000265689 | ENSP00000321239 |
| ENSP00000265689 | ENSP00000325506 |
| ENSP00000265689 | ENSP00000325863 |
| ENSP00000265689 | ENSP00000342609 |
| ENSP00000265689 | ENSP00000342793 |
| ENSP00000265689 | ENSP00000361667 |
| ENSP00000265689 | ENSP00000362171 |
| ENSP00000265689 | ENSP00000369860 |
| ENSP00000265689 | ENSP00000376268 |
| ENSP00000265689 | ENSP00000386722 |
| ENSP00000265717 | ENSP00000273390 |
| ENSP00000265717 | ENSP00000277865 |
| ENSP00000265717 | ENSP00000286835 |
| ENSP00000265717 | ENSP00000287878 |

|                 |                 |
|-----------------|-----------------|
| ENSP00000265717 | ENSP00000295709 |
| ENSP00000265717 | ENSP00000297338 |
| ENSP00000265717 | ENSP00000300146 |
| ENSP00000265717 | ENSP00000301831 |
| ENSP00000265717 | ENSP00000310649 |
| ENSP00000265717 | ENSP00000310701 |
| ENSP00000265717 | ENSP00000315615 |
| ENSP00000265717 | ENSP00000318351 |
| ENSP00000265717 | ENSP00000318775 |
| ENSP00000265717 | ENSP00000329357 |
| ENSP00000265717 | ENSP00000337736 |
| ENSP00000265717 | ENSP00000339109 |
| ENSP00000265717 | ENSP00000343313 |
| ENSP00000265717 | ENSP00000344666 |
| ENSP00000265717 | ENSP00000346725 |
| ENSP00000265717 | ENSP00000348573 |
| ENSP00000265717 | ENSP00000351327 |
| ENSP00000265717 | ENSP00000352425 |
| ENSP00000265717 | ENSP00000353508 |
| ENSP00000265717 | ENSP00000354558 |
| ENSP00000265717 | ENSP00000356146 |
| ENSP00000265717 | ENSP00000360485 |
| ENSP00000265717 | ENSP00000361465 |
| ENSP00000265717 | ENSP00000363649 |
| ENSP00000265717 | ENSP00000383295 |
| ENSP00000265717 | ENSP00000384313 |
| ENSP00000265717 | ENSP00000396620 |
| ENSP00000265717 | ENSP00000403852 |
| ENSP00000265727 | ENSP00000281172 |
| ENSP00000265727 | ENSP00000360472 |
| ENSP00000265728 | ENSP00000270861 |
| ENSP00000265728 | ENSP00000274289 |
| ENSP00000265728 | ENSP00000286428 |
| ENSP00000265728 | ENSP00000297431 |
| ENSP00000265728 | ENSP00000301280 |
| ENSP00000265728 | ENSP00000317039 |
| ENSP00000265728 | ENSP00000321636 |
| ENSP00000265728 | ENSP00000322180 |
| ENSP00000265728 | ENSP00000335357 |
| ENSP00000265728 | ENSP00000337088 |
| ENSP00000265728 | ENSP00000339109 |
| ENSP00000265728 | ENSP00000340879 |
| ENSP00000265728 | ENSP00000343741 |
| ENSP00000265728 | ENSP00000351284 |
| ENSP00000265728 | ENSP00000353793 |
| ENSP00000265728 | ENSP00000354916 |

|                 |                 |
|-----------------|-----------------|
| ENSP00000265728 | ENSP00000360473 |
| ENSP00000265728 | ENSP00000360621 |
| ENSP00000265728 | ENSP00000368349 |
| ENSP00000265728 | ENSP00000368438 |
| ENSP00000265728 | ENSP00000369335 |
| ENSP00000265728 | ENSP00000370151 |
| ENSP00000265728 | ENSP00000372023 |
| ENSP00000265728 | ENSP00000380504 |
| ENSP00000265728 | ENSP00000413632 |
| ENSP00000265732 | ENSP00000298310 |
| ENSP00000265732 | ENSP00000299335 |
| ENSP00000265732 | ENSP00000320566 |
| ENSP00000265732 | ENSP00000325448 |
| ENSP00000265732 | ENSP00000356405 |
| ENSP00000265732 | ENSP00000360025 |
| ENSP00000265732 | ENSP00000380453 |
| ENSP00000265748 | ENSP00000299424 |
| ENSP00000265748 | ENSP00000360532 |
| ENSP00000265748 | ENSP00000380921 |
| ENSP00000265753 | ENSP00000266735 |
| ENSP00000265753 | ENSP00000268482 |
| ENSP00000265753 | ENSP00000293406 |
| ENSP00000265753 | ENSP00000303191 |
| ENSP00000265753 | ENSP00000305790 |
| ENSP00000265753 | ENSP00000312066 |
| ENSP00000265753 | ENSP00000327821 |
| ENSP00000265753 | ENSP00000328690 |
| ENSP00000265753 | ENSP00000335321 |
| ENSP00000265753 | ENSP00000336702 |
| ENSP00000265753 | ENSP00000338862 |
| ENSP00000265753 | ENSP00000341947 |
| ENSP00000265753 | ENSP00000346725 |
| ENSP00000265753 | ENSP00000348010 |
| ENSP00000265753 | ENSP00000359345 |
| ENSP00000265753 | ENSP00000362110 |
| ENSP00000265753 | ENSP00000366557 |
| ENSP00000265753 | ENSP00000376973 |
| ENSP00000265753 | ENSP00000398350 |
| ENSP00000265753 | ENSP00000400591 |
| ENSP00000265753 | ENSP00000412566 |
| ENSP00000265758 | ENSP00000277010 |
| ENSP00000265758 | ENSP00000309433 |
| ENSP00000265758 | ENSP00000311135 |
| ENSP00000265758 | ENSP00000312870 |
| ENSP00000265758 | ENSP00000325448 |
| ENSP00000265758 | ENSP00000332171 |

|                 |                 |
|-----------------|-----------------|
| ENSP00000265758 | ENSP00000333920 |
| ENSP00000265758 | ENSP00000364289 |
| ENSP00000265758 | ENSP00000376268 |
| ENSP00000265758 | ENSP00000380982 |
| ENSP00000265758 | ENSP00000396937 |
| ENSP00000265806 | ENSP00000388330 |
| ENSP00000265810 | ENSP00000350249 |
| ENSP00000265810 | ENSP00000358994 |
| ENSP00000265810 | ENSP00000377496 |
| ENSP00000265825 | ENSP00000283713 |
| ENSP00000265827 | ENSP00000341679 |
| ENSP00000265849 | ENSP00000265970 |
| ENSP00000265849 | ENSP00000267430 |
| ENSP00000265849 | ENSP00000278856 |
| ENSP00000265849 | ENSP00000285021 |
| ENSP00000265849 | ENSP00000286800 |
| ENSP00000265849 | ENSP00000287295 |
| ENSP00000265849 | ENSP00000290158 |
| ENSP00000265849 | ENSP00000298852 |
| ENSP00000265849 | ENSP00000301764 |
| ENSP00000265849 | ENSP00000307853 |
| ENSP00000265849 | ENSP00000310520 |
| ENSP00000265849 | ENSP00000311873 |
| ENSP00000265849 | ENSP00000312995 |
| ENSP00000265849 | ENSP00000313420 |
| ENSP00000265849 | ENSP00000318977 |
| ENSP00000265849 | ENSP00000322570 |
| ENSP00000265849 | ENSP00000324127 |
| ENSP00000265849 | ENSP00000325002 |
| ENSP00000265849 | ENSP00000343190 |
| ENSP00000265849 | ENSP00000347978 |
| ENSP00000265849 | ENSP00000348020 |
| ENSP00000265849 | ENSP00000351284 |
| ENSP00000265849 | ENSP00000351697 |
| ENSP00000265849 | ENSP00000354497 |
| ENSP00000265849 | ENSP00000359818 |
| ENSP00000265849 | ENSP00000361310 |
| ENSP00000265849 | ENSP00000364270 |
| ENSP00000265849 | ENSP00000368349 |
| ENSP00000265849 | ENSP00000368438 |
| ENSP00000265849 | ENSP00000369335 |
| ENSP00000265849 | ENSP00000369497 |
| ENSP00000265849 | ENSP00000384211 |
| ENSP00000265857 | ENSP00000270708 |
| ENSP00000265857 | ENSP00000272322 |
| ENSP00000265857 | ENSP00000286448 |

|                 |                 |
|-----------------|-----------------|
| ENSP00000265857 | ENSP00000290649 |
| ENSP00000265857 | ENSP00000294053 |
| ENSP00000265857 | ENSP00000297185 |
| ENSP00000265857 | ENSP00000303584 |
| ENSP00000265857 | ENSP00000305459 |
| ENSP00000265857 | ENSP00000309433 |
| ENSP00000265857 | ENSP00000310521 |
| ENSP00000265857 | ENSP00000314499 |
| ENSP00000265857 | ENSP00000327716 |
| ENSP00000265857 | ENSP00000328023 |
| ENSP00000265857 | ENSP00000333934 |
| ENSP00000265857 | ENSP00000338533 |
| ENSP00000265857 | ENSP00000347948 |
| ENSP00000265857 | ENSP00000349887 |
| ENSP00000265857 | ENSP00000350708 |
| ENSP00000265857 | ENSP00000357887 |
| ENSP00000265857 | ENSP00000362824 |
| ENSP00000265857 | ENSP00000364847 |
| ENSP00000265857 | ENSP00000377040 |
| ENSP00000265857 | ENSP00000383911 |
| ENSP00000265857 | ENSP00000390783 |
| ENSP00000265857 | ENSP00000397441 |
| ENSP00000265872 | ENSP00000286186 |
| ENSP00000265872 | ENSP00000296137 |
| ENSP00000265872 | ENSP00000307863 |
| ENSP00000265872 | ENSP00000310040 |
| ENSP00000265872 | ENSP00000323913 |
| ENSP00000265872 | ENSP00000326514 |
| ENSP00000265872 | ENSP00000329466 |
| ENSP00000265872 | ENSP00000352668 |
| ENSP00000265872 | ENSP00000360497 |
| ENSP00000265872 | ENSP00000365439 |
| ENSP00000265872 | ENSP00000366829 |
| ENSP00000265872 | ENSP00000382239 |
| ENSP00000265872 | ENSP00000417281 |
| ENSP00000265881 | ENSP00000296577 |
| ENSP00000265881 | ENSP00000321711 |
| ENSP00000265881 | ENSP00000340019 |
| ENSP00000265881 | ENSP00000343313 |
| ENSP00000265881 | ENSP00000352021 |
| ENSP00000265881 | ENSP00000361010 |
| ENSP00000265881 | ENSP00000366135 |
| ENSP00000265881 | ENSP00000372093 |
| ENSP00000265896 | ENSP00000269703 |
| ENSP00000265896 | ENSP00000272163 |
| ENSP00000265896 | ENSP00000274137 |



|                 |                 |
|-----------------|-----------------|
| ENSP00000265896 | ENSP00000277010 |
| ENSP00000265896 | ENSP00000282841 |
| ENSP00000265896 | ENSP00000285949 |
| ENSP00000265896 | ENSP00000307214 |
| ENSP00000265896 | ENSP00000310721 |
| ENSP00000265896 | ENSP00000320604 |
| ENSP00000265896 | ENSP00000325425 |
| ENSP00000265896 | ENSP00000330812 |
| ENSP00000265896 | ENSP00000331719 |
| ENSP00000265896 | ENSP00000334044 |
| ENSP00000265896 | ENSP00000339484 |
| ENSP00000265896 | ENSP00000341662 |
| ENSP00000265896 | ENSP00000342136 |
| ENSP00000265896 | ENSP00000348380 |
| ENSP00000265896 | ENSP00000349078 |
| ENSP00000265896 | ENSP00000355890 |
| ENSP00000265896 | ENSP00000356405 |
| ENSP00000265896 | ENSP00000357650 |
| ENSP00000265896 | ENSP00000360327 |
| ENSP00000265896 | ENSP00000360918 |
| ENSP00000265896 | ENSP00000366249 |
| ENSP00000265896 | ENSP00000368699 |
| ENSP00000265896 | ENSP00000369038 |
| ENSP00000265896 | ENSP00000373039 |
| ENSP00000265896 | ENSP00000396152 |
| ENSP00000265896 | ENSP00000401508 |
| ENSP00000265896 | ENSP00000410416 |
| ENSP00000265944 | ENSP00000268182 |
| ENSP00000265944 | ENSP00000295685 |
| ENSP00000265944 | ENSP00000303315 |
| ENSP00000265944 | ENSP00000352802 |
| ENSP00000265960 | ENSP00000272444 |
| ENSP00000265960 | ENSP00000272972 |
| ENSP00000265960 | ENSP00000298630 |
| ENSP00000265960 | ENSP00000301729 |
| ENSP00000265960 | ENSP00000306124 |
| ENSP00000265960 | ENSP00000307272 |
| ENSP00000265960 | ENSP00000311005 |
| ENSP00000265960 | ENSP00000322532 |
| ENSP00000265960 | ENSP00000346142 |
| ENSP00000265960 | ENSP00000347206 |
| ENSP00000265960 | ENSP00000349959 |
| ENSP00000265960 | ENSP00000354558 |
| ENSP00000265960 | ENSP00000358497 |
| ENSP00000265960 | ENSP00000359345 |
| ENSP00000265960 | ENSP00000359552 |

|                 |                 |
|-----------------|-----------------|
| ENSP00000265960 | ENSP00000362314 |
| ENSP00000265960 | ENSP00000369757 |
| ENSP00000265960 | ENSP00000371888 |
| ENSP00000265960 | ENSP00000373399 |
| ENSP00000265960 | ENSP00000377865 |
| ENSP00000265960 | ENSP00000389103 |
| ENSP00000265960 | ENSP00000399511 |
| ENSP00000265960 | ENSP00000401435 |
| ENSP00000265963 | ENSP00000273075 |
| ENSP00000265963 | ENSP00000278412 |
| ENSP00000265963 | ENSP00000282326 |
| ENSP00000265963 | ENSP00000282884 |
| ENSP00000265963 | ENSP00000283875 |
| ENSP00000265963 | ENSP00000285021 |
| ENSP00000265963 | ENSP00000285398 |
| ENSP00000265963 | ENSP00000307850 |
| ENSP00000265963 | ENSP00000310520 |
| ENSP00000265963 | ENSP00000317232 |
| ENSP00000265963 | ENSP00000317891 |
| ENSP00000265963 | ENSP00000341243 |
| ENSP00000265963 | ENSP00000347978 |
| ENSP00000265963 | ENSP00000348168 |
| ENSP00000265963 | ENSP00000350708 |
| ENSP00000265963 | ENSP00000359290 |
| ENSP00000265963 | ENSP00000359818 |
| ENSP00000265963 | ENSP00000362208 |
| ENSP00000265963 | ENSP00000363021 |
| ENSP00000265963 | ENSP00000363812 |
| ENSP00000265963 | ENSP00000364270 |
| ENSP00000265963 | ENSP00000368959 |
| ENSP00000265963 | ENSP00000373340 |
| ENSP00000265963 | ENSP00000375809 |
| ENSP00000265963 | ENSP00000384312 |
| ENSP00000265963 | ENSP00000413152 |
| ENSP00000265970 | ENSP00000272227 |
| ENSP00000265970 | ENSP00000278412 |
| ENSP00000265970 | ENSP00000279230 |
| ENSP00000265970 | ENSP00000283195 |
| ENSP00000265970 | ENSP00000294168 |
| ENSP00000265970 | ENSP00000298552 |
| ENSP00000265970 | ENSP00000302886 |
| ENSP00000265970 | ENSP00000306124 |
| ENSP00000265970 | ENSP00000307684 |
| ENSP00000265970 | ENSP00000317790 |
| ENSP00000265970 | ENSP00000325690 |
| ENSP00000265970 | ENSP00000337127 |

|                 |                 |
|-----------------|-----------------|
| ENSP00000265970 | ENSP00000343362 |
| ENSP00000265970 | ENSP00000344537 |
| ENSP00000265970 | ENSP00000346437 |
| ENSP00000265970 | ENSP00000357547 |
| ENSP00000265970 | ENSP00000358140 |
| ENSP00000265970 | ENSP00000361824 |
| ENSP00000265970 | ENSP00000362413 |
| ENSP00000265970 | ENSP00000362807 |
| ENSP00000265970 | ENSP00000365439 |
| ENSP00000265970 | ENSP00000369335 |
| ENSP00000265970 | ENSP00000406490 |
| ENSP00000265981 | ENSP00000302120 |
| ENSP00000265983 | ENSP00000277865 |
| ENSP00000265983 | ENSP00000295897 |
| ENSP00000265990 | ENSP00000267064 |
| ENSP00000265990 | ENSP00000270225 |
| ENSP00000265990 | ENSP00000272065 |
| ENSP00000265990 | ENSP00000278412 |
| ENSP00000265990 | ENSP00000283928 |
| ENSP00000265990 | ENSP00000285021 |
| ENSP00000265990 | ENSP00000290524 |
| ENSP00000265990 | ENSP00000294168 |
| ENSP00000265990 | ENSP00000296257 |
| ENSP00000265990 | ENSP00000296328 |
| ENSP00000265990 | ENSP00000300648 |
| ENSP00000265990 | ENSP00000301012 |
| ENSP00000265990 | ENSP00000302640 |
| ENSP00000265990 | ENSP00000306983 |
| ENSP00000265990 | ENSP00000307208 |
| ENSP00000265990 | ENSP00000307684 |
| ENSP00000265990 | ENSP00000307850 |
| ENSP00000265990 | ENSP00000308944 |
| ENSP00000265990 | ENSP00000312735 |
| ENSP00000265990 | ENSP00000314949 |
| ENSP00000265990 | ENSP00000320566 |
| ENSP00000265990 | ENSP00000322242 |
| ENSP00000265990 | ENSP00000323720 |
| ENSP00000265990 | ENSP00000325863 |
| ENSP00000265990 | ENSP00000326806 |
| ENSP00000265990 | ENSP00000327197 |
| ENSP00000265990 | ENSP00000329933 |
| ENSP00000265990 | ENSP00000331310 |
| ENSP00000265990 | ENSP00000332171 |
| ENSP00000265990 | ENSP00000332208 |
| ENSP00000265990 | ENSP00000333657 |
| ENSP00000265990 | ENSP00000333920 |

|                 |                 |
|-----------------|-----------------|
| ENSP00000265990 | ENSP00000334474 |
| ENSP00000265990 | ENSP00000336842 |
| ENSP00000265990 | ENSP00000336856 |
| ENSP00000265990 | ENSP00000341243 |
| ENSP00000265990 | ENSP00000342181 |
| ENSP00000265990 | ENSP00000342434 |
| ENSP00000265990 | ENSP00000342793 |
| ENSP00000265990 | ENSP00000344537 |
| ENSP00000265990 | ENSP00000347168 |
| ENSP00000265990 | ENSP00000347602 |
| ENSP00000265990 | ENSP00000347719 |
| ENSP00000265990 | ENSP00000347733 |
| ENSP00000265990 | ENSP00000348714 |
| ENSP00000265990 | ENSP00000349213 |
| ENSP00000265990 | ENSP00000350767 |
| ENSP00000265990 | ENSP00000351284 |
| ENSP00000265990 | ENSP00000351575 |
| ENSP00000265990 | ENSP00000353458 |
| ENSP00000265990 | ENSP00000353622 |
| ENSP00000265990 | ENSP00000354673 |
| ENSP00000265990 | ENSP00000354723 |
| ENSP00000265990 | ENSP00000355205 |
| ENSP00000265990 | ENSP00000358478 |
| ENSP00000265990 | ENSP00000358854 |
| ENSP00000265990 | ENSP00000358886 |
| ENSP00000265990 | ENSP00000359290 |
| ENSP00000265990 | ENSP00000359531 |
| ENSP00000265990 | ENSP00000360515 |
| ENSP00000265990 | ENSP00000360532 |
| ENSP00000265990 | ENSP00000361245 |
| ENSP00000265990 | ENSP00000361465 |
| ENSP00000265990 | ENSP00000362352 |
| ENSP00000265990 | ENSP00000362592 |
| ENSP00000265990 | ENSP00000364289 |
| ENSP00000265990 | ENSP00000366974 |
| ENSP00000265990 | ENSP00000367034 |
| ENSP00000265990 | ENSP00000369335 |
| ENSP00000265990 | ENSP00000369695 |
| ENSP00000265990 | ENSP00000369716 |
| ENSP00000265990 | ENSP00000374213 |
| ENSP00000265990 | ENSP00000374280 |
| ENSP00000265990 | ENSP00000376534 |
| ENSP00000265990 | ENSP00000377655 |
| ENSP00000265990 | ENSP00000379372 |
| ENSP00000265990 | ENSP00000384597 |
| ENSP00000265990 | ENSP00000394791 |

|                 |                 |
|-----------------|-----------------|
| ENSP00000265990 | ENSP00000397259 |
| ENSP00000265990 | ENSP00000397644 |
| ENSP00000265990 | ENSP00000402527 |
| ENSP00000265990 | ENSP00000417281 |
| ENSP00000265990 | ENSP00000418734 |
| ENSP00000265993 | ENSP00000304941 |
| ENSP00000266000 | ENSP00000268058 |
| ENSP00000266000 | ENSP00000291582 |
| ENSP00000266000 | ENSP00000296257 |
| ENSP00000266000 | ENSP00000301838 |
| ENSP00000266000 | ENSP00000306548 |
| ENSP00000266000 | ENSP00000307889 |
| ENSP00000266000 | ENSP00000312697 |
| ENSP00000266000 | ENSP00000326767 |
| ENSP00000266000 | ENSP00000329140 |
| ENSP00000266000 | ENSP00000340278 |
| ENSP00000266000 | ENSP00000341551 |
| ENSP00000266000 | ENSP00000343535 |
| ENSP00000266000 | ENSP00000344460 |
| ENSP00000266000 | ENSP00000347979 |
| ENSP00000266000 | ENSP00000349640 |
| ENSP00000266000 | ENSP00000351908 |
| ENSP00000266000 | ENSP00000352516 |
| ENSP00000266000 | ENSP00000355153 |
| ENSP00000266000 | ENSP00000355896 |
| ENSP00000266000 | ENSP00000358404 |
| ENSP00000266000 | ENSP00000362441 |
| ENSP00000266000 | ENSP00000364398 |
| ENSP00000266000 | ENSP00000366974 |
| ENSP00000266000 | ENSP00000373952 |
| ENSP00000266000 | ENSP00000380414 |
| ENSP00000266000 | ENSP00000396876 |
| ENSP00000266000 | ENSP00000404623 |
| ENSP00000266000 | ENSP00000417281 |
| ENSP00000266022 | ENSP00000305790 |
| ENSP00000266022 | ENSP00000329466 |
| ENSP00000266022 | ENSP00000375986 |
| ENSP00000266025 | ENSP00000288422 |
| ENSP00000266025 | ENSP00000352706 |
| ENSP00000266025 | ENSP00000356231 |
| ENSP00000266025 | ENSP00000358335 |
| ENSP00000266025 | ENSP00000361949 |
| ENSP00000266025 | ENSP00000394791 |
| ENSP00000266037 | ENSP00000300574 |
| ENSP00000266037 | ENSP00000305422 |
| ENSP00000266037 | ENSP00000313829 |

|                 |                 |
|-----------------|-----------------|
| ENSP00000266037 | ENSP00000326366 |
| ENSP00000266037 | ENSP00000369716 |
| ENSP00000266037 | ENSP00000387593 |
| ENSP00000266058 | ENSP00000355809 |
| ENSP00000266058 | ENSP00000356595 |
| ENSP00000266058 | ENSP00000381840 |
| ENSP00000266066 | ENSP00000268459 |
| ENSP00000266066 | ENSP00000310800 |
| ENSP00000266066 | ENSP00000352516 |
| ENSP00000266066 | ENSP00000363081 |
| ENSP00000266066 | ENSP00000404658 |
| ENSP00000266069 | ENSP00000268719 |
| ENSP00000266069 | ENSP00000294008 |
| ENSP00000266069 | ENSP00000300022 |
| ENSP00000266069 | ENSP00000302830 |
| ENSP00000266069 | ENSP00000311825 |
| ENSP00000266069 | ENSP00000315859 |
| ENSP00000266069 | ENSP00000320623 |
| ENSP00000266069 | ENSP00000351221 |
| ENSP00000266069 | ENSP00000358417 |
| ENSP00000266069 | ENSP00000374260 |
| ENSP00000266069 | ENSP00000379568 |
| ENSP00000266070 | ENSP00000269703 |
| ENSP00000266070 | ENSP00000295066 |
| ENSP00000266070 | ENSP00000299601 |
| ENSP00000266070 | ENSP00000304593 |
| ENSP00000266070 | ENSP00000308466 |
| ENSP00000266070 | ENSP00000329466 |
| ENSP00000266070 | ENSP00000353059 |
| ENSP00000266070 | ENSP00000356405 |
| ENSP00000266070 | ENSP00000356448 |
| ENSP00000266070 | ENSP00000357887 |
| ENSP00000266070 | ENSP00000360532 |
| ENSP00000266070 | ENSP00000365439 |
| ENSP00000266070 | ENSP00000374213 |
| ENSP00000266070 | ENSP00000374280 |
| ENSP00000266070 | ENSP00000386759 |
| ENSP00000266079 | ENSP00000266735 |
| ENSP00000266079 | ENSP00000267812 |
| ENSP00000266079 | ENSP00000268482 |
| ENSP00000266079 | ENSP00000268483 |
| ENSP00000266079 | ENSP00000270538 |
| ENSP00000266079 | ENSP00000271628 |
| ENSP00000266079 | ENSP00000274712 |
| ENSP00000266079 | ENSP00000278412 |
| ENSP00000266079 | ENSP00000300146 |

|                 |                 |
|-----------------|-----------------|
| ENSP00000266079 | ENSP00000300413 |
| ENSP00000266079 | ENSP00000301740 |
| ENSP00000266079 | ENSP00000301764 |
| ENSP00000266079 | ENSP00000302160 |
| ENSP00000266079 | ENSP00000304350 |
| ENSP00000266079 | ENSP00000304903 |
| ENSP00000266079 | ENSP00000305790 |
| ENSP00000266079 | ENSP00000308546 |
| ENSP00000266079 | ENSP00000310448 |
| ENSP00000266079 | ENSP00000310596 |
| ENSP00000266079 | ENSP00000312981 |
| ENSP00000266079 | ENSP00000313674 |
| ENSP00000266079 | ENSP00000315035 |
| ENSP00000266079 | ENSP00000315379 |
| ENSP00000266079 | ENSP00000315859 |
| ENSP00000266079 | ENSP00000318861 |
| ENSP00000266079 | ENSP00000319341 |
| ENSP00000266079 | ENSP00000324122 |
| ENSP00000266079 | ENSP00000329466 |
| ENSP00000266079 | ENSP00000331487 |
| ENSP00000266079 | ENSP00000331817 |
| ENSP00000266079 | ENSP00000332103 |
| ENSP00000266079 | ENSP00000335321 |
| ENSP00000266079 | ENSP00000337194 |
| ENSP00000266079 | ENSP00000337405 |
| ENSP00000266079 | ENSP00000342374 |
| ENSP00000266079 | ENSP00000347087 |
| ENSP00000266079 | ENSP00000348010 |
| ENSP00000266079 | ENSP00000348163 |
| ENSP00000266079 | ENSP00000358605 |
| ENSP00000266079 | ENSP00000360532 |
| ENSP00000266079 | ENSP00000361557 |
| ENSP00000266079 | ENSP00000361577 |
| ENSP00000266079 | ENSP00000362110 |
| ENSP00000266079 | ENSP00000363313 |
| ENSP00000266079 | ENSP00000364289 |
| ENSP00000266079 | ENSP00000364813 |
| ENSP00000266079 | ENSP00000372883 |
| ENSP00000266079 | ENSP00000378529 |
| ENSP00000266079 | ENSP00000387170 |
| ENSP00000266079 | ENSP00000391432 |
| ENSP00000266079 | ENSP00000396301 |
| ENSP00000266079 | ENSP00000400591 |
| ENSP00000266079 | ENSP00000403345 |
| ENSP00000266079 | ENSP00000406280 |
| ENSP00000266079 | ENSP00000410758 |

|                 |                 |
|-----------------|-----------------|
| ENSP00000266079 | ENSP00000412566 |
| ENSP00000266079 | ENSP00000414006 |
| ENSP00000266079 | ENSP00000414634 |
| ENSP00000266079 | ENSP00000416959 |
| ENSP00000266087 | ENSP00000304102 |
| ENSP00000266087 | ENSP00000311280 |
| ENSP00000266087 | ENSP00000317872 |
| ENSP00000266087 | ENSP00000327704 |
| ENSP00000266095 | ENSP00000267845 |
| ENSP00000266095 | ENSP00000272418 |
| ENSP00000266095 | ENSP00000274680 |
| ENSP00000266095 | ENSP00000280665 |
| ENSP00000266095 | ENSP00000282587 |
| ENSP00000266095 | ENSP00000287936 |
| ENSP00000266095 | ENSP00000295890 |
| ENSP00000266095 | ENSP00000298569 |
| ENSP00000266095 | ENSP00000302114 |
| ENSP00000266095 | ENSP00000302177 |
| ENSP00000266095 | ENSP00000302441 |
| ENSP00000266095 | ENSP00000313432 |
| ENSP00000266095 | ENSP00000314196 |
| ENSP00000266095 | ENSP00000317334 |
| ENSP00000266095 | ENSP00000319323 |
| ENSP00000266095 | ENSP00000320309 |
| ENSP00000266095 | ENSP00000322218 |
| ENSP00000266095 | ENSP00000331719 |
| ENSP00000266095 | ENSP00000340093 |
| ENSP00000266095 | ENSP00000341885 |
| ENSP00000266095 | ENSP00000343190 |
| ENSP00000266095 | ENSP00000348886 |
| ENSP00000266095 | ENSP00000350263 |
| ENSP00000266095 | ENSP00000350928 |
| ENSP00000266095 | ENSP00000353073 |
| ENSP00000266095 | ENSP00000354519 |
| ENSP00000266095 | ENSP00000356329 |
| ENSP00000266095 | ENSP00000356587 |
| ENSP00000266095 | ENSP00000361642 |
| ENSP00000266095 | ENSP00000362298 |
| ENSP00000266095 | ENSP00000365007 |
| ENSP00000266095 | ENSP00000368140 |
| ENSP00000266095 | ENSP00000368439 |
| ENSP00000266095 | ENSP00000369843 |
| ENSP00000266095 | ENSP00000379836 |
| ENSP00000266095 | ENSP00000382492 |
| ENSP00000266095 | ENSP00000389813 |
| ENSP00000266095 | ENSP00000415203 |



|                 |                 |
|-----------------|-----------------|
| ENSP00000266126 | ENSP00000266971 |
| ENSP00000266126 | ENSP00000269122 |
| ENSP00000266126 | ENSP00000273075 |
| ENSP00000266126 | ENSP00000273783 |
| ENSP00000266126 | ENSP00000284957 |
| ENSP00000266126 | ENSP00000285873 |
| ENSP00000266126 | ENSP00000287878 |
| ENSP00000266126 | ENSP00000302239 |
| ENSP00000266126 | ENSP00000302801 |
| ENSP00000266126 | ENSP00000304292 |
| ENSP00000266126 | ENSP00000304668 |
| ENSP00000266126 | ENSP00000317334 |
| ENSP00000266126 | ENSP00000325448 |
| ENSP00000266126 | ENSP00000330408 |
| ENSP00000266126 | ENSP00000339435 |
| ENSP00000266126 | ENSP00000340836 |
| ENSP00000266126 | ENSP00000342502 |
| ENSP00000266126 | ENSP00000343701 |
| ENSP00000266126 | ENSP00000343885 |
| ENSP00000266126 | ENSP00000344456 |
| ENSP00000266126 | ENSP00000345096 |
| ENSP00000266126 | ENSP00000349016 |
| ENSP00000266126 | ENSP00000350215 |
| ENSP00000266126 | ENSP00000352820 |
| ENSP00000266126 | ENSP00000353059 |
| ENSP00000266126 | ENSP00000353575 |
| ENSP00000266126 | ENSP00000364119 |
| ENSP00000266126 | ENSP00000364212 |
| ENSP00000266126 | ENSP00000365811 |
| ENSP00000266126 | ENSP00000366953 |
| ENSP00000266126 | ENSP00000369038 |
| ENSP00000266126 | ENSP00000374399 |
| ENSP00000266126 | ENSP00000377665 |
| ENSP00000266126 | ENSP00000381293 |
| ENSP00000266126 | ENSP00000382595 |
| ENSP00000266126 | ENSP00000392859 |
| ENSP00000266126 | ENSP00000394869 |
| ENSP00000266182 | ENSP00000280665 |
| ENSP00000266182 | ENSP00000313171 |
| ENSP00000266182 | ENSP00000320503 |
| ENSP00000266269 | ENSP00000286800 |
| ENSP00000266483 | ENSP00000295770 |
| ENSP00000266483 | ENSP00000296255 |
| ENSP00000266483 | ENSP00000299626 |
| ENSP00000266483 | ENSP00000333813 |
| ENSP00000266483 | ENSP00000340466 |

|                 |                 |
|-----------------|-----------------|
| ENSP00000266483 | ENSP00000360149 |
| ENSP00000266483 | ENSP00000360644 |
| ENSP00000266483 | ENSP00000364188 |
| ENSP00000266483 | ENSP00000380793 |
| ENSP00000266529 | ENSP00000297151 |
| ENSP00000266529 | ENSP00000303191 |
| ENSP00000266529 | ENSP00000338862 |
| ENSP00000266529 | ENSP00000366557 |
| ENSP00000266529 | ENSP00000376973 |
| ENSP00000266529 | ENSP00000400591 |
| ENSP00000266544 | ENSP00000268379 |
| ENSP00000266544 | ENSP00000301585 |
| ENSP00000266544 | ENSP00000325448 |
| ENSP00000266544 | ENSP00000327268 |
| ENSP00000266544 | ENSP00000330737 |
| ENSP00000266544 | ENSP00000343885 |
| ENSP00000266544 | ENSP00000356972 |
| ENSP00000266544 | ENSP00000360782 |
| ENSP00000266544 | ENSP00000364847 |
| ENSP00000266544 | ENSP00000380523 |
| ENSP00000266544 | ENSP00000387219 |
| ENSP00000266544 | ENSP00000397435 |
| ENSP00000266556 | ENSP00000278937 |
| ENSP00000266556 | ENSP00000307786 |
| ENSP00000266556 | ENSP00000341141 |
| ENSP00000266556 | ENSP00000348307 |
| ENSP00000266556 | ENSP00000356991 |
| ENSP00000266556 | ENSP00000382178 |
| ENSP00000266556 | ENSP00000382323 |
| ENSP00000266557 | ENSP00000276893 |
| ENSP00000266557 | ENSP00000342681 |
| ENSP00000266604 | ENSP00000345917 |
| ENSP00000266604 | ENSP00000379607 |
| ENSP00000266671 | ENSP00000345156 |
| ENSP00000266671 | ENSP00000361949 |
| ENSP00000266673 | ENSP00000354032 |
| ENSP00000266712 | ENSP00000280350 |
| ENSP00000266712 | ENSP00000298292 |
| ENSP00000266712 | ENSP00000377769 |
| ENSP00000266712 | ENSP00000397441 |
| ENSP00000266732 | ENSP00000267163 |
| ENSP00000266732 | ENSP00000268711 |
| ENSP00000266732 | ENSP00000296137 |
| ENSP00000266732 | ENSP00000297338 |
| ENSP00000266732 | ENSP00000320508 |
| ENSP00000266732 | ENSP00000337340 |

|                 |                 |
|-----------------|-----------------|
| ENSP00000266732 | ENSP00000343535 |
| ENSP00000266732 | ENSP00000344456 |
| ENSP00000266732 | ENSP00000351947 |
| ENSP00000266732 | ENSP00000353073 |
| ENSP00000266732 | ENSP00000357283 |
| ENSP00000266732 | ENSP00000360532 |
| ENSP00000266732 | ENSP00000370083 |
| ENSP00000266735 | ENSP00000268482 |
| ENSP00000266735 | ENSP00000268483 |
| ENSP00000266735 | ENSP00000272645 |
| ENSP00000266735 | ENSP00000281950 |
| ENSP00000266735 | ENSP00000285873 |
| ENSP00000266735 | ENSP00000293406 |
| ENSP00000266735 | ENSP00000300413 |
| ENSP00000266735 | ENSP00000301740 |
| ENSP00000266735 | ENSP00000301764 |
| ENSP00000266735 | ENSP00000302160 |
| ENSP00000266735 | ENSP00000303191 |
| ENSP00000266735 | ENSP00000304350 |
| ENSP00000266735 | ENSP00000304370 |
| ENSP00000266735 | ENSP00000304903 |
| ENSP00000266735 | ENSP00000305790 |
| ENSP00000266735 | ENSP00000306561 |
| ENSP00000266735 | ENSP00000308533 |
| ENSP00000266735 | ENSP00000308546 |
| ENSP00000266735 | ENSP00000310448 |
| ENSP00000266735 | ENSP00000310596 |
| ENSP00000266735 | ENSP00000313674 |
| ENSP00000266735 | ENSP00000314491 |
| ENSP00000266735 | ENSP00000315035 |
| ENSP00000266735 | ENSP00000315379 |
| ENSP00000266735 | ENSP00000318861 |
| ENSP00000266735 | ENSP00000322016 |
| ENSP00000266735 | ENSP00000323288 |
| ENSP00000266735 | ENSP00000323302 |
| ENSP00000266735 | ENSP00000324122 |
| ENSP00000266735 | ENSP00000325448 |
| ENSP00000266735 | ENSP00000326261 |
| ENSP00000266735 | ENSP00000326806 |
| ENSP00000266735 | ENSP00000334148 |
| ENSP00000266735 | ENSP00000335321 |
| ENSP00000266735 | ENSP00000337405 |
| ENSP00000266735 | ENSP00000342374 |
| ENSP00000266735 | ENSP00000346986 |
| ENSP00000266735 | ENSP00000348010 |
| ENSP00000266735 | ENSP00000358716 |

|                 |                 |
|-----------------|-----------------|
| ENSP00000266735 | ENSP00000359127 |
| ENSP00000266735 | ENSP00000359939 |
| ENSP00000266735 | ENSP00000360532 |
| ENSP00000266735 | ENSP00000360876 |
| ENSP00000266735 | ENSP00000362110 |
| ENSP00000266735 | ENSP00000362936 |
| ENSP00000266735 | ENSP00000363313 |
| ENSP00000266735 | ENSP00000364289 |
| ENSP00000266735 | ENSP00000366557 |
| ENSP00000266735 | ENSP00000370083 |
| ENSP00000266735 | ENSP00000370119 |
| ENSP00000266735 | ENSP00000376309 |
| ENSP00000266735 | ENSP00000376758 |
| ENSP00000266735 | ENSP00000376973 |
| ENSP00000266735 | ENSP00000378529 |
| ENSP00000266735 | ENSP00000379607 |
| ENSP00000266735 | ENSP00000400591 |
| ENSP00000266735 | ENSP00000410758 |
| ENSP00000266735 | ENSP00000412566 |
| ENSP00000266735 | ENSP00000416959 |
| ENSP00000266735 | ENSP00000420195 |
| ENSP00000266743 | ENSP00000308699 |
| ENSP00000266743 | ENSP00000341382 |
| ENSP00000266743 | ENSP00000354720 |
| ENSP00000266743 | ENSP00000369497 |
| ENSP00000266744 | ENSP00000272937 |
| ENSP00000266744 | ENSP00000277541 |
| ENSP00000266744 | ENSP00000302216 |
| ENSP00000266744 | ENSP00000316578 |
| ENSP00000266744 | ENSP00000317333 |
| ENSP00000266744 | ENSP00000332353 |
| ENSP00000266744 | ENSP00000350012 |
| ENSP00000266744 | ENSP00000358404 |
| ENSP00000266971 | ENSP00000325136 |
| ENSP00000266971 | ENSP00000334474 |
| ENSP00000266971 | ENSP00000337852 |
| ENSP00000266971 | ENSP00000378350 |
| ENSP00000266971 | ENSP00000394869 |
| ENSP00000266971 | ENSP00000407401 |
| ENSP00000266980 | ENSP00000355968 |
| ENSP00000266980 | ENSP00000379836 |
| ENSP00000266987 | ENSP00000282892 |
| ENSP00000266987 | ENSP00000311747 |
| ENSP00000266987 | ENSP00000334813 |
| ENSP00000266987 | ENSP00000343745 |
| ENSP00000266987 | ENSP00000344666 |

|                 |                 |
|-----------------|-----------------|
| ENSP00000266987 | ENSP00000360916 |
| ENSP00000267017 | ENSP00000307822 |
| ENSP00000267023 | ENSP00000278616 |
| ENSP00000267023 | ENSP00000310260 |
| ENSP00000267023 | ENSP00000318641 |
| ENSP00000267023 | ENSP00000327889 |
| ENSP00000267023 | ENSP00000385722 |
| ENSP00000267064 | ENSP00000269385 |
| ENSP00000267064 | ENSP00000269397 |
| ENSP00000267064 | ENSP00000271452 |
| ENSP00000267064 | ENSP00000271555 |
| ENSP00000267064 | ENSP00000276072 |
| ENSP00000267064 | ENSP00000276603 |
| ENSP00000267064 | ENSP00000278412 |
| ENSP00000267064 | ENSP00000283109 |
| ENSP00000267064 | ENSP00000286317 |
| ENSP00000267064 | ENSP00000287239 |
| ENSP00000267064 | ENSP00000290158 |
| ENSP00000267064 | ENSP00000290663 |
| ENSP00000267064 | ENSP00000292035 |
| ENSP00000267064 | ENSP00000293777 |
| ENSP00000267064 | ENSP00000297347 |
| ENSP00000267064 | ENSP00000298532 |
| ENSP00000267064 | ENSP00000299767 |
| ENSP00000267064 | ENSP00000300086 |
| ENSP00000267064 | ENSP00000300151 |
| ENSP00000267064 | ENSP00000306983 |
| ENSP00000267064 | ENSP00000308750 |
| ENSP00000267064 | ENSP00000311816 |
| ENSP00000267064 | ENSP00000314311 |
| ENSP00000267064 | ENSP00000314949 |
| ENSP00000267064 | ENSP00000315768 |
| ENSP00000267064 | ENSP00000317872 |
| ENSP00000267064 | ENSP00000320485 |
| ENSP00000267064 | ENSP00000323720 |
| ENSP00000267064 | ENSP00000323967 |
| ENSP00000267064 | ENSP00000324463 |
| ENSP00000267064 | ENSP00000325612 |
| ENSP00000267064 | ENSP00000325690 |
| ENSP00000267064 | ENSP00000325863 |
| ENSP00000267064 | ENSP00000326128 |
| ENSP00000267064 | ENSP00000326261 |
| ENSP00000267064 | ENSP00000326806 |
| ENSP00000267064 | ENSP00000329357 |
| ENSP00000267064 | ENSP00000329466 |
| ENSP00000267064 | ENSP00000334848 |

|                 |                 |
|-----------------|-----------------|
| ENSP00000267064 | ENSP00000335044 |
| ENSP00000267064 | ENSP00000336712 |
| ENSP00000267064 | ENSP00000341805 |
| ENSP00000267064 | ENSP00000342434 |
| ENSP00000267064 | ENSP00000342905 |
| ENSP00000267064 | ENSP00000344456 |
| ENSP00000267064 | ENSP00000344537 |
| ENSP00000267064 | ENSP00000347168 |
| ENSP00000267064 | ENSP00000348234 |
| ENSP00000267064 | ENSP00000349213 |
| ENSP00000267064 | ENSP00000350283 |
| ENSP00000267064 | ENSP00000350767 |
| ENSP00000267064 | ENSP00000351947 |
| ENSP00000267064 | ENSP00000353458 |
| ENSP00000267064 | ENSP00000353622 |
| ENSP00000267064 | ENSP00000353735 |
| ENSP00000267064 | ENSP00000354920 |
| ENSP00000267064 | ENSP00000354995 |
| ENSP00000267064 | ENSP00000355051 |
| ENSP00000267064 | ENSP00000357047 |
| ENSP00000267064 | ENSP00000357494 |
| ENSP00000267064 | ENSP00000358854 |
| ENSP00000267064 | ENSP00000359321 |
| ENSP00000267064 | ENSP00000360532 |
| ENSP00000267064 | ENSP00000362068 |
| ENSP00000267064 | ENSP00000362748 |
| ENSP00000267064 | ENSP00000362936 |
| ENSP00000267064 | ENSP00000362948 |
| ENSP00000267064 | ENSP00000363021 |
| ENSP00000267064 | ENSP00000364929 |
| ENSP00000267064 | ENSP00000365588 |
| ENSP00000267064 | ENSP00000366828 |
| ENSP00000267064 | ENSP00000366974 |
| ENSP00000267064 | ENSP00000367034 |
| ENSP00000267064 | ENSP00000368686 |
| ENSP00000267064 | ENSP00000369351 |
| ENSP00000267064 | ENSP00000369695 |
| ENSP00000267064 | ENSP00000370719 |
| ENSP00000267064 | ENSP00000371875 |
| ENSP00000267064 | ENSP00000373060 |
| ENSP00000267064 | ENSP00000373347 |
| ENSP00000267064 | ENSP00000374213 |
| ENSP00000267064 | ENSP00000378180 |
| ENSP00000267064 | ENSP00000378394 |
| ENSP00000267064 | ENSP00000379607 |
| ENSP00000267064 | ENSP00000381216 |

|                 |                 |
|-----------------|-----------------|
| ENSP00000267064 | ENSP00000384048 |
| ENSP00000267064 | ENSP00000384223 |
| ENSP00000267064 | ENSP00000384490 |
| ENSP00000267064 | ENSP00000387429 |
| ENSP00000267064 | ENSP00000391774 |
| ENSP00000267064 | ENSP00000392028 |
| ENSP00000267064 | ENSP00000392617 |
| ENSP00000267064 | ENSP00000404318 |
| ENSP00000267064 | ENSP00000408910 |
| ENSP00000267064 | ENSP00000409167 |
| ENSP00000267064 | ENSP00000417281 |
| ENSP00000267068 | ENSP00000363313 |
| ENSP00000267101 | ENSP00000274376 |
| ENSP00000267101 | ENSP00000277541 |
| ENSP00000267101 | ENSP00000278780 |
| ENSP00000267101 | ENSP00000281092 |
| ENSP00000267101 | ENSP00000286364 |
| ENSP00000267101 | ENSP00000288602 |
| ENSP00000267101 | ENSP00000289422 |
| ENSP00000267101 | ENSP00000296255 |
| ENSP00000267101 | ENSP00000300574 |
| ENSP00000267101 | ENSP00000302886 |
| ENSP00000267101 | ENSP00000303315 |
| ENSP00000267101 | ENSP00000306245 |
| ENSP00000267101 | ENSP00000334061 |
| ENSP00000267101 | ENSP00000338799 |
| ENSP00000267101 | ENSP00000338983 |
| ENSP00000267101 | ENSP00000339952 |
| ENSP00000267101 | ENSP00000340944 |
| ENSP00000267101 | ENSP00000341189 |
| ENSP00000267101 | ENSP00000342755 |
| ENSP00000267101 | ENSP00000343785 |
| ENSP00000267101 | ENSP00000344456 |
| ENSP00000267101 | ENSP00000347294 |
| ENSP00000267101 | ENSP00000350512 |
| ENSP00000267101 | ENSP00000353154 |
| ENSP00000267101 | ENSP00000355001 |
| ENSP00000267101 | ENSP00000356595 |
| ENSP00000267101 | ENSP00000358404 |
| ENSP00000267101 | ENSP00000359474 |
| ENSP00000267101 | ENSP00000360916 |
| ENSP00000267101 | ENSP00000363812 |
| ENSP00000267101 | ENSP00000364893 |
| ENSP00000267101 | ENSP00000364898 |
| ENSP00000267101 | ENSP00000372703 |
| ENSP00000267101 | ENSP00000378165 |

|                 |                 |
|-----------------|-----------------|
| ENSP00000267101 | ENSP00000383295 |
| ENSP00000267101 | ENSP00000384675 |
| ENSP00000267101 | ENSP00000393286 |
| ENSP00000267101 | ENSP00000393870 |
| ENSP00000267101 | ENSP00000399938 |
| ENSP00000267101 | ENSP00000400104 |
| ENSP00000267101 | ENSP00000402590 |
| ENSP00000267101 | ENSP00000415034 |
| ENSP00000267101 | ENSP00000417281 |
| ENSP00000267101 | ENSP00000418748 |
| ENSP00000267103 | ENSP00000270225 |
| ENSP00000267103 | ENSP00000293362 |
| ENSP00000267103 | ENSP00000301729 |
| ENSP00000267103 | ENSP00000322532 |
| ENSP00000267103 | ENSP00000331719 |
| ENSP00000267103 | ENSP00000336856 |
| ENSP00000267103 | ENSP00000338413 |
| ENSP00000267103 | ENSP00000350512 |
| ENSP00000267103 | ENSP00000352706 |
| ENSP00000267103 | ENSP00000366030 |
| ENSP00000267103 | ENSP00000368439 |
| ENSP00000267103 | ENSP00000368605 |
| ENSP00000267103 | ENSP00000420588 |
| ENSP00000267113 | ENSP00000300648 |
| ENSP00000267113 | ENSP00000346015 |
| ENSP00000267163 | ENSP00000267622 |
| ENSP00000267163 | ENSP00000268058 |
| ENSP00000267163 | ENSP00000269397 |
| ENSP00000267163 | ENSP00000274031 |
| ENSP00000267163 | ENSP00000274255 |
| ENSP00000267163 | ENSP00000276072 |
| ENSP00000267163 | ENSP00000276893 |
| ENSP00000267163 | ENSP00000284000 |
| ENSP00000267163 | ENSP00000286186 |
| ENSP00000267163 | ENSP00000287820 |
| ENSP00000267163 | ENSP00000292535 |
| ENSP00000267163 | ENSP00000294339 |
| ENSP00000267163 | ENSP00000296930 |
| ENSP00000267163 | ENSP00000301727 |
| ENSP00000267163 | ENSP00000302640 |
| ENSP00000267163 | ENSP00000302886 |
| ENSP00000267163 | ENSP00000303315 |
| ENSP00000267163 | ENSP00000303507 |
| ENSP00000267163 | ENSP00000305422 |
| ENSP00000267163 | ENSP00000305899 |
| ENSP00000267163 | ENSP00000306245 |



|                 |                 |
|-----------------|-----------------|
| ENSP00000267163 | ENSP00000312664 |
| ENSP00000267163 | ENSP00000314004 |
| ENSP00000267163 | ENSP00000317872 |
| ENSP00000267163 | ENSP00000318195 |
| ENSP00000267163 | ENSP00000318352 |
| ENSP00000267163 | ENSP00000320340 |
| ENSP00000267163 | ENSP00000323050 |
| ENSP00000267163 | ENSP00000324020 |
| ENSP00000267163 | ENSP00000325677 |
| ENSP00000267163 | ENSP00000329029 |
| ENSP00000267163 | ENSP00000329102 |
| ENSP00000267163 | ENSP00000329357 |
| ENSP00000267163 | ENSP00000331310 |
| ENSP00000267163 | ENSP00000332353 |
| ENSP00000267163 | ENSP00000336866 |
| ENSP00000267163 | ENSP00000338157 |
| ENSP00000267163 | ENSP00000340305 |
| ENSP00000267163 | ENSP00000341848 |
| ENSP00000267163 | ENSP00000341947 |
| ENSP00000267163 | ENSP00000342307 |
| ENSP00000267163 | ENSP00000347602 |
| ENSP00000267163 | ENSP00000348554 |
| ENSP00000267163 | ENSP00000348986 |
| ENSP00000267163 | ENSP00000349049 |
| ENSP00000267163 | ENSP00000350283 |
| ENSP00000267163 | ENSP00000350359 |
| ENSP00000267163 | ENSP00000351407 |
| ENSP00000267163 | ENSP00000351575 |
| ENSP00000267163 | ENSP00000351894 |
| ENSP00000267163 | ENSP00000352514 |
| ENSP00000267163 | ENSP00000352516 |
| ENSP00000267163 | ENSP00000354158 |
| ENSP00000267163 | ENSP00000354486 |
| ENSP00000267163 | ENSP00000355922 |
| ENSP00000267163 | ENSP00000357283 |
| ENSP00000267163 | ENSP00000362592 |
| ENSP00000267163 | ENSP00000363787 |
| ENSP00000267163 | ENSP00000364524 |
| ENSP00000267163 | ENSP00000365439 |
| ENSP00000267163 | ENSP00000365877 |
| ENSP00000267163 | ENSP00000365899 |
| ENSP00000267163 | ENSP00000367797 |
| ENSP00000267163 | ENSP00000367972 |
| ENSP00000267163 | ENSP00000368349 |
| ENSP00000267163 | ENSP00000368686 |
| ENSP00000267163 | ENSP00000369519 |

|                 |                 |
|-----------------|-----------------|
| ENSP00000267163 | ENSP00000370047 |
| ENSP00000267163 | ENSP00000372023 |
| ENSP00000267163 | ENSP00000378529 |
| ENSP00000267163 | ENSP00000382688 |
| ENSP00000267163 | ENSP00000384026 |
| ENSP00000267163 | ENSP00000386165 |
| ENSP00000267163 | ENSP00000392466 |
| ENSP00000267163 | ENSP00000396439 |
| ENSP00000267163 | ENSP00000413720 |
| ENSP00000267163 | ENSP00000414187 |
| ENSP00000267163 | ENSP00000417281 |
| ENSP00000267169 | ENSP00000314733 |
| ENSP00000267169 | ENSP00000340019 |
| ENSP00000267169 | ENSP00000351407 |
| ENSP00000267169 | ENSP00000393596 |
| ENSP00000267176 | ENSP00000277541 |
| ENSP00000267176 | ENSP00000328169 |
| ENSP00000267197 | ENSP00000278616 |
| ENSP00000267197 | ENSP00000280190 |
| ENSP00000267197 | ENSP00000283875 |
| ENSP00000267197 | ENSP00000286835 |
| ENSP00000267197 | ENSP00000290158 |
| ENSP00000267197 | ENSP00000295066 |
| ENSP00000267197 | ENSP00000296490 |
| ENSP00000267197 | ENSP00000296755 |
| ENSP00000267197 | ENSP00000300231 |
| ENSP00000267197 | ENSP00000300658 |
| ENSP00000267197 | ENSP00000304360 |
| ENSP00000267197 | ENSP00000304593 |
| ENSP00000267197 | ENSP00000307272 |
| ENSP00000267197 | ENSP00000311513 |
| ENSP00000267197 | ENSP00000312735 |
| ENSP00000267197 | ENSP00000312778 |
| ENSP00000267197 | ENSP00000314949 |
| ENSP00000267197 | ENSP00000317334 |
| ENSP00000267197 | ENSP00000319169 |
| ENSP00000267197 | ENSP00000320566 |
| ENSP00000267197 | ENSP00000325677 |
| ENSP00000267197 | ENSP00000329933 |
| ENSP00000267197 | ENSP00000340879 |
| ENSP00000267197 | ENSP00000340896 |
| ENSP00000267197 | ENSP00000341280 |
| ENSP00000267197 | ENSP00000343741 |
| ENSP00000267197 | ENSP00000348551 |
| ENSP00000267197 | ENSP00000349049 |
| ENSP00000267197 | ENSP00000351284 |

|                 |                 |
|-----------------|-----------------|
| ENSP00000267197 | ENSP00000352821 |
| ENSP00000267197 | ENSP00000353698 |
| ENSP00000267197 | ENSP00000353998 |
| ENSP00000267197 | ENSP00000354720 |
| ENSP00000267197 | ENSP00000354977 |
| ENSP00000267197 | ENSP00000355013 |
| ENSP00000267197 | ENSP00000356146 |
| ENSP00000267197 | ENSP00000360621 |
| ENSP00000267197 | ENSP00000366974 |
| ENSP00000267197 | ENSP00000369716 |
| ENSP00000267197 | ENSP00000370151 |
| ENSP00000267197 | ENSP00000370968 |
| ENSP00000267197 | ENSP00000371475 |
| ENSP00000267197 | ENSP00000374152 |
| ENSP00000267197 | ENSP00000374213 |
| ENSP00000267197 | ENSP00000376946 |
| ENSP00000267197 | ENSP00000377747 |
| ENSP00000267197 | ENSP00000381657 |
| ENSP00000267197 | ENSP00000382688 |
| ENSP00000267197 | ENSP00000386759 |
| ENSP00000267197 | ENSP00000390475 |
| ENSP00000267197 | ENSP00000414321 |
| ENSP00000267294 | ENSP00000358404 |
| ENSP00000267339 | ENSP00000348010 |
| ENSP00000267339 | ENSP00000349959 |
| ENSP00000267396 | ENSP00000267415 |
| ENSP00000267415 | ENSP00000268605 |
| ENSP00000267415 | ENSP00000276603 |
| ENSP00000267415 | ENSP00000280097 |
| ENSP00000267415 | ENSP00000290216 |
| ENSP00000267415 | ENSP00000292385 |
| ENSP00000267415 | ENSP00000299427 |
| ENSP00000267415 | ENSP00000300086 |
| ENSP00000267415 | ENSP00000301843 |
| ENSP00000267415 | ENSP00000303042 |
| ENSP00000267415 | ENSP00000303570 |
| ENSP00000267415 | ENSP00000304854 |
| ENSP00000267415 | ENSP00000319170 |
| ENSP00000267415 | ENSP00000321636 |
| ENSP00000267415 | ENSP00000322457 |
| ENSP00000267415 | ENSP00000323782 |
| ENSP00000267415 | ENSP00000324884 |
| ENSP00000267415 | ENSP00000338989 |
| ENSP00000267415 | ENSP00000346067 |
| ENSP00000267415 | ENSP00000348394 |
| ENSP00000267415 | ENSP00000350249 |

|                 |                 |
|-----------------|-----------------|
| ENSP00000267415 | ENSP00000353701 |
| ENSP00000267415 | ENSP00000354826 |
| ENSP00000267415 | ENSP00000358081 |
| ENSP00000267415 | ENSP00000361894 |
| ENSP00000267415 | ENSP00000361965 |
| ENSP00000267415 | ENSP00000367086 |
| ENSP00000267415 | ENSP00000368887 |
| ENSP00000267415 | ENSP00000370517 |
| ENSP00000267415 | ENSP00000370521 |
| ENSP00000267415 | ENSP00000372689 |
| ENSP00000267415 | ENSP00000377496 |
| ENSP00000267415 | ENSP00000384391 |
| ENSP00000267415 | ENSP00000391944 |
| ENSP00000267415 | ENSP00000407401 |
| ENSP00000267425 | ENSP00000272521 |
| ENSP00000267425 | ENSP00000274606 |
| ENSP00000267425 | ENSP00000278856 |
| ENSP00000267425 | ENSP00000291576 |
| ENSP00000267425 | ENSP00000296411 |
| ENSP00000267425 | ENSP00000296792 |
| ENSP00000267425 | ENSP00000297579 |
| ENSP00000267425 | ENSP00000297990 |
| ENSP00000267425 | ENSP00000298746 |
| ENSP00000267425 | ENSP00000301364 |
| ENSP00000267425 | ENSP00000302886 |
| ENSP00000267425 | ENSP00000305702 |
| ENSP00000267425 | ENSP00000311135 |
| ENSP00000267425 | ENSP00000314193 |
| ENSP00000267425 | ENSP00000314348 |
| ENSP00000267425 | ENSP00000318195 |
| ENSP00000267425 | ENSP00000321449 |
| ENSP00000267425 | ENSP00000324122 |
| ENSP00000267425 | ENSP00000325312 |
| ENSP00000267425 | ENSP00000327179 |
| ENSP00000267425 | ENSP00000331907 |
| ENSP00000267425 | ENSP00000338573 |
| ENSP00000267425 | ENSP00000343557 |
| ENSP00000267425 | ENSP00000346120 |
| ENSP00000267425 | ENSP00000354040 |
| ENSP00000267425 | ENSP00000355471 |
| ENSP00000267425 | ENSP00000355541 |
| ENSP00000267425 | ENSP00000356134 |
| ENSP00000267425 | ENSP00000358563 |
| ENSP00000267425 | ENSP00000358812 |
| ENSP00000267425 | ENSP00000360031 |
| ENSP00000267425 | ENSP00000361982 |

|                 |                 |
|-----------------|-----------------|
| ENSP00000267425 | ENSP00000362153 |
| ENSP00000267425 | ENSP00000363642 |
| ENSP00000267425 | ENSP00000363746 |
| ENSP00000267425 | ENSP00000365806 |
| ENSP00000267425 | ENSP00000366557 |
| ENSP00000267425 | ENSP00000369042 |
| ENSP00000267425 | ENSP00000370589 |
| ENSP00000267425 | ENSP00000371101 |
| ENSP00000267425 | ENSP00000372695 |
| ENSP00000267425 | ENSP00000373090 |
| ENSP00000267425 | ENSP00000374390 |
| ENSP00000267425 | ENSP00000384302 |
| ENSP00000267425 | ENSP00000386621 |
| ENSP00000267425 | ENSP00000394290 |
| ENSP00000267425 | ENSP00000399454 |
| ENSP00000267425 | ENSP00000402869 |
| ENSP00000267425 | ENSP00000403576 |
| ENSP00000267425 | ENSP00000405614 |
| ENSP00000267425 | ENSP00000409074 |
| ENSP00000267425 | ENSP00000409367 |
| ENSP00000267425 | ENSP00000411162 |
| ENSP00000267430 | ENSP00000268043 |
| ENSP00000267430 | ENSP00000268206 |
| ENSP00000267430 | ENSP00000287437 |
| ENSP00000267430 | ENSP00000289081 |
| ENSP00000267430 | ENSP00000290949 |
| ENSP00000267430 | ENSP00000296215 |
| ENSP00000267430 | ENSP00000296509 |
| ENSP00000267430 | ENSP00000296805 |
| ENSP00000267430 | ENSP00000302951 |
| ENSP00000267430 | ENSP00000302955 |
| ENSP00000267430 | ENSP00000306561 |
| ENSP00000267430 | ENSP00000307853 |
| ENSP00000267430 | ENSP00000308944 |
| ENSP00000267430 | ENSP00000310356 |
| ENSP00000267430 | ENSP00000310520 |
| ENSP00000267430 | ENSP00000311873 |
| ENSP00000267430 | ENSP00000313171 |
| ENSP00000267430 | ENSP00000314491 |
| ENSP00000267430 | ENSP00000315700 |
| ENSP00000267430 | ENSP00000317039 |
| ENSP00000267430 | ENSP00000318977 |
| ENSP00000267430 | ENSP00000321636 |
| ENSP00000267430 | ENSP00000322570 |
| ENSP00000267430 | ENSP00000323439 |
| ENSP00000267430 | ENSP00000323511 |

|                 |                 |
|-----------------|-----------------|
| ENSP00000267430 | ENSP00000325863 |
| ENSP00000267430 | ENSP00000326819 |
| ENSP00000267430 | ENSP00000330875 |
| ENSP00000267430 | ENSP00000333283 |
| ENSP00000267430 | ENSP00000334188 |
| ENSP00000267430 | ENSP00000336606 |
| ENSP00000267430 | ENSP00000337353 |
| ENSP00000267430 | ENSP00000340305 |
| ENSP00000267430 | ENSP00000340879 |
| ENSP00000267430 | ENSP00000341243 |
| ENSP00000267430 | ENSP00000341382 |
| ENSP00000267430 | ENSP00000343392 |
| ENSP00000267430 | ENSP00000343741 |
| ENSP00000267430 | ENSP00000343745 |
| ENSP00000267430 | ENSP00000344741 |
| ENSP00000267430 | ENSP00000345917 |
| ENSP00000267430 | ENSP00000347232 |
| ENSP00000267430 | ENSP00000347978 |
| ENSP00000267430 | ENSP00000349393 |
| ENSP00000267430 | ENSP00000351284 |
| ENSP00000267430 | ENSP00000351697 |
| ENSP00000267430 | ENSP00000352257 |
| ENSP00000267430 | ENSP00000353332 |
| ENSP00000267430 | ENSP00000354522 |
| ENSP00000267430 | ENSP00000354720 |
| ENSP00000267430 | ENSP00000354957 |
| ENSP00000267430 | ENSP00000355077 |
| ENSP00000267430 | ENSP00000355185 |
| ENSP00000267430 | ENSP00000355388 |
| ENSP00000267430 | ENSP00000358019 |
| ENSP00000267430 | ENSP00000358478 |
| ENSP00000267430 | ENSP00000358576 |
| ENSP00000267430 | ENSP00000359818 |
| ENSP00000267430 | ENSP00000359904 |
| ENSP00000267430 | ENSP00000360116 |
| ENSP00000267430 | ENSP00000360310 |
| ENSP00000267430 | ENSP00000360803 |
| ENSP00000267430 | ENSP00000361310 |
| ENSP00000267430 | ENSP00000363021 |
| ENSP00000267430 | ENSP00000364126 |
| ENSP00000267430 | ENSP00000364270 |
| ENSP00000267430 | ENSP00000364699 |
| ENSP00000267430 | ENSP00000367527 |
| ENSP00000267430 | ENSP00000367787 |
| ENSP00000267430 | ENSP00000367808 |
| ENSP00000267430 | ENSP00000367910 |

|                 |                 |
|-----------------|-----------------|
| ENSP00000267430 | ENSP00000368349 |
| ENSP00000267430 | ENSP00000368438 |
| ENSP00000267430 | ENSP00000369335 |
| ENSP00000267430 | ENSP00000370151 |
| ENSP00000267430 | ENSP00000370376 |
| ENSP00000267430 | ENSP00000371475 |
| ENSP00000267430 | ENSP00000373952 |
| ENSP00000267430 | ENSP00000381657 |
| ENSP00000267430 | ENSP00000385021 |
| ENSP00000267430 | ENSP00000394649 |
| ENSP00000267430 | ENSP00000396704 |
| ENSP00000267430 | ENSP00000400806 |
| ENSP00000267430 | ENSP00000402515 |
| ENSP00000267430 | ENSP00000406490 |
| ENSP00000267430 | ENSP00000406868 |
| ENSP00000267430 | ENSP00000407047 |
| ENSP00000267484 | ENSP00000269159 |
| ENSP00000267484 | ENSP00000273398 |
| ENSP00000267484 | ENSP00000280527 |
| ENSP00000267484 | ENSP00000290299 |
| ENSP00000267484 | ENSP00000292475 |
| ENSP00000267484 | ENSP00000294724 |
| ENSP00000267484 | ENSP00000320885 |
| ENSP00000267484 | ENSP00000321606 |
| ENSP00000267484 | ENSP00000323377 |
| ENSP00000267484 | ENSP00000332979 |
| ENSP00000267484 | ENSP00000337838 |
| ENSP00000267484 | ENSP00000344106 |
| ENSP00000267484 | ENSP00000345656 |
| ENSP00000267484 | ENSP00000347232 |
| ENSP00000267484 | ENSP00000355777 |
| ENSP00000267484 | ENSP00000363349 |
| ENSP00000267484 | ENSP00000363397 |
| ENSP00000267484 | ENSP00000368959 |
| ENSP00000267484 | ENSP00000369862 |
| ENSP00000267484 | ENSP00000385083 |
| ENSP00000267484 | ENSP00000389934 |
| ENSP00000267522 | ENSP00000269159 |
| ENSP00000267540 | ENSP00000276570 |
| ENSP00000267540 | ENSP00000360798 |
| ENSP00000267540 | ENSP00000370719 |
| ENSP00000267584 | ENSP00000298545 |
| ENSP00000267584 | ENSP00000346577 |
| ENSP00000267615 | ENSP00000346340 |
| ENSP00000267615 | ENSP00000350512 |
| ENSP00000267615 | ENSP00000360532 |

|                 |                 |
|-----------------|-----------------|
| ENSP00000267622 | ENSP00000351407 |
| ENSP00000267622 | ENSP00000379607 |
| ENSP00000267750 | ENSP00000327716 |
| ENSP00000267750 | ENSP00000366565 |
| ENSP00000267750 | ENSP00000420608 |
| ENSP00000267807 | ENSP00000295951 |
| ENSP00000267807 | ENSP00000298317 |
| ENSP00000267807 | ENSP00000322915 |
| ENSP00000267807 | ENSP00000323288 |
| ENSP00000267807 | ENSP00000336587 |
| ENSP00000267807 | ENSP00000350094 |
| ENSP00000267807 | ENSP00000373331 |
| ENSP00000267812 | ENSP00000268206 |
| ENSP00000267812 | ENSP00000268482 |
| ENSP00000267812 | ENSP00000271628 |
| ENSP00000267812 | ENSP00000274712 |
| ENSP00000267812 | ENSP00000295488 |
| ENSP00000267812 | ENSP00000296215 |
| ENSP00000267812 | ENSP00000296702 |
| ENSP00000267812 | ENSP00000296805 |
| ENSP00000267812 | ENSP00000298532 |
| ENSP00000267812 | ENSP00000300413 |
| ENSP00000267812 | ENSP00000301764 |
| ENSP00000267812 | ENSP00000303191 |
| ENSP00000267812 | ENSP00000304350 |
| ENSP00000267812 | ENSP00000305790 |
| ENSP00000267812 | ENSP00000307863 |
| ENSP00000267812 | ENSP00000308369 |
| ENSP00000267812 | ENSP00000310448 |
| ENSP00000267812 | ENSP00000310723 |
| ENSP00000267812 | ENSP00000315379 |
| ENSP00000267812 | ENSP00000318861 |
| ENSP00000267812 | ENSP00000319341 |
| ENSP00000267812 | ENSP00000323302 |
| ENSP00000267812 | ENSP00000324122 |
| ENSP00000267812 | ENSP00000332103 |
| ENSP00000267812 | ENSP00000335321 |
| ENSP00000267812 | ENSP00000339090 |
| ENSP00000267812 | ENSP00000342374 |
| ENSP00000267812 | ENSP00000346236 |
| ENSP00000267812 | ENSP00000351137 |
| ENSP00000267812 | ENSP00000357631 |
| ENSP00000267812 | ENSP00000358554 |
| ENSP00000267812 | ENSP00000358605 |
| ENSP00000267812 | ENSP00000359454 |
| ENSP00000267812 | ENSP00000360488 |



|                 |                 |
|-----------------|-----------------|
| ENSP00000267812 | ENSP00000360532 |
| ENSP00000267812 | ENSP00000360828 |
| ENSP00000267812 | ENSP00000361577 |
| ENSP00000267812 | ENSP00000362110 |
| ENSP00000267812 | ENSP00000363313 |
| ENSP00000267812 | ENSP00000366557 |
| ENSP00000267812 | ENSP00000370589 |
| ENSP00000267812 | ENSP00000378338 |
| ENSP00000267812 | ENSP00000380336 |
| ENSP00000267812 | ENSP00000394085 |
| ENSP00000267812 | ENSP00000396301 |
| ENSP00000267812 | ENSP00000412566 |
| ENSP00000267812 | ENSP00000419851 |
| ENSP00000267845 | ENSP00000268251 |
| ENSP00000267845 | ENSP00000370571 |
| ENSP00000267884 | ENSP00000282999 |
| ENSP00000267884 | ENSP00000283871 |
| ENSP00000267884 | ENSP00000294360 |
| ENSP00000267884 | ENSP00000305230 |
| ENSP00000267884 | ENSP00000312066 |
| ENSP00000267884 | ENSP00000342181 |
| ENSP00000267884 | ENSP00000346120 |
| ENSP00000267884 | ENSP00000370589 |
| ENSP00000267884 | ENSP00000379607 |
| ENSP00000267884 | ENSP00000403817 |
| ENSP00000267935 | ENSP00000287598 |
| ENSP00000267935 | ENSP00000308236 |
| ENSP00000267953 | ENSP00000293288 |
| ENSP00000267953 | ENSP00000309103 |
| ENSP00000267953 | ENSP00000314132 |
| ENSP00000267953 | ENSP00000318822 |
| ENSP00000267953 | ENSP00000326119 |
| ENSP00000267953 | ENSP00000346697 |
| ENSP00000267953 | ENSP00000363591 |
| ENSP00000267970 | ENSP00000381031 |
| ENSP00000267978 | ENSP00000273075 |
| ENSP00000267978 | ENSP00000288976 |
| ENSP00000267978 | ENSP00000299853 |
| ENSP00000267978 | ENSP00000335357 |
| ENSP00000267978 | ENSP00000354720 |
| ENSP00000267978 | ENSP00000354916 |
| ENSP00000267978 | ENSP00000357674 |
| ENSP00000267978 | ENSP00000361465 |
| ENSP00000267978 | ENSP00000365175 |
| ENSP00000267978 | ENSP00000387477 |
| ENSP00000267978 | ENSP00000415363 |

|                 |                 |
|-----------------|-----------------|
| ENSP00000268043 | ENSP00000278616 |
| ENSP00000268043 | ENSP00000287598 |
| ENSP00000268043 | ENSP00000288774 |
| ENSP00000268043 | ENSP00000296273 |
| ENSP00000268043 | ENSP00000296755 |
| ENSP00000268043 | ENSP00000297431 |
| ENSP00000268043 | ENSP00000298139 |
| ENSP00000268043 | ENSP00000300231 |
| ENSP00000268043 | ENSP00000300738 |
| ENSP00000268043 | ENSP00000302530 |
| ENSP00000268043 | ENSP00000306561 |
| ENSP00000268043 | ENSP00000307853 |
| ENSP00000268043 | ENSP00000308944 |
| ENSP00000268043 | ENSP00000309572 |
| ENSP00000268043 | ENSP00000310520 |
| ENSP00000268043 | ENSP00000311873 |
| ENSP00000268043 | ENSP00000313171 |
| ENSP00000268043 | ENSP00000317039 |
| ENSP00000268043 | ENSP00000317636 |
| ENSP00000268043 | ENSP00000318977 |
| ENSP00000268043 | ENSP00000321636 |
| ENSP00000268043 | ENSP00000322180 |
| ENSP00000268043 | ENSP00000322570 |
| ENSP00000268043 | ENSP00000323439 |
| ENSP00000268043 | ENSP00000324792 |
| ENSP00000268043 | ENSP00000325863 |
| ENSP00000268043 | ENSP00000326534 |
| ENSP00000268043 | ENSP00000330343 |
| ENSP00000268043 | ENSP00000336606 |
| ENSP00000268043 | ENSP00000341243 |
| ENSP00000268043 | ENSP00000341382 |
| ENSP00000268043 | ENSP00000343392 |
| ENSP00000268043 | ENSP00000343741 |
| ENSP00000268043 | ENSP00000347232 |
| ENSP00000268043 | ENSP00000347978 |
| ENSP00000268043 | ENSP00000349393 |
| ENSP00000268043 | ENSP00000350491 |
| ENSP00000268043 | ENSP00000351284 |
| ENSP00000268043 | ENSP00000351524 |
| ENSP00000268043 | ENSP00000351697 |
| ENSP00000268043 | ENSP00000351885 |
| ENSP00000268043 | ENSP00000352257 |
| ENSP00000268043 | ENSP00000353793 |
| ENSP00000268043 | ENSP00000354522 |
| ENSP00000268043 | ENSP00000354957 |
| ENSP00000268043 | ENSP00000355922 |

|                 |                 |
|-----------------|-----------------|
| ENSP00000268043 | ENSP00000358478 |
| ENSP00000268043 | ENSP00000360817 |
| ENSP00000268043 | ENSP00000362135 |
| ENSP00000268043 | ENSP00000363021 |
| ENSP00000268043 | ENSP00000365588 |
| ENSP00000268043 | ENSP00000366135 |
| ENSP00000268043 | ENSP00000367787 |
| ENSP00000268043 | ENSP00000368349 |
| ENSP00000268043 | ENSP00000368438 |
| ENSP00000268043 | ENSP00000369335 |
| ENSP00000268043 | ENSP00000369411 |
| ENSP00000268043 | ENSP00000370151 |
| ENSP00000268043 | ENSP00000371475 |
| ENSP00000268043 | ENSP00000372023 |
| ENSP00000268043 | ENSP00000373060 |
| ENSP00000268043 | ENSP00000375809 |
| ENSP00000268043 | ENSP00000384048 |
| ENSP00000268043 | ENSP00000386759 |
| ENSP00000268043 | ENSP00000387429 |
| ENSP00000268043 | ENSP00000396484 |
| ENSP00000268043 | ENSP00000402515 |
| ENSP00000268043 | ENSP00000404318 |
| ENSP00000268043 | ENSP00000409167 |
| ENSP00000268043 | ENSP00000415212 |
| ENSP00000268043 | ENSP00000416511 |
| ENSP00000268043 | ENSP00000417963 |
| ENSP00000268057 | ENSP00000274353 |
| ENSP00000268057 | ENSP00000280350 |
| ENSP00000268057 | ENSP00000295240 |
| ENSP00000268057 | ENSP00000298292 |
| ENSP00000268057 | ENSP00000319062 |
| ENSP00000268057 | ENSP00000327077 |
| ENSP00000268057 | ENSP00000331746 |
| ENSP00000268057 | ENSP00000334100 |
| ENSP00000268057 | ENSP00000353701 |
| ENSP00000268057 | ENSP00000354791 |
| ENSP00000268057 | ENSP00000358140 |
| ENSP00000268057 | ENSP00000370031 |
| ENSP00000268057 | ENSP00000397644 |
| ENSP00000268058 | ENSP00000282728 |
| ENSP00000268058 | ENSP00000286317 |
| ENSP00000268058 | ENSP00000287820 |
| ENSP00000268058 | ENSP00000288199 |
| ENSP00000268058 | ENSP00000293362 |
| ENSP00000268058 | ENSP00000296257 |
| ENSP00000268058 | ENSP00000296273 |

|                 |                 |
|-----------------|-----------------|
| ENSP00000268058 | ENSP00000296930 |
| ENSP00000268058 | ENSP00000300086 |
| ENSP00000268058 | ENSP00000306163 |
| ENSP00000268058 | ENSP00000306245 |
| ENSP00000268058 | ENSP00000309572 |
| ENSP00000268058 | ENSP00000311005 |
| ENSP00000268058 | ENSP00000311280 |
| ENSP00000268058 | ENSP00000316578 |
| ENSP00000268058 | ENSP00000321636 |
| ENSP00000268058 | ENSP00000327048 |
| ENSP00000268058 | ENSP00000327959 |
| ENSP00000268058 | ENSP00000328088 |
| ENSP00000268058 | ENSP00000329357 |
| ENSP00000268058 | ENSP00000329623 |
| ENSP00000268058 | ENSP00000330343 |
| ENSP00000268058 | ENSP00000333275 |
| ENSP00000268058 | ENSP00000338157 |
| ENSP00000268058 | ENSP00000341024 |
| ENSP00000268058 | ENSP00000343023 |
| ENSP00000268058 | ENSP00000345681 |
| ENSP00000268058 | ENSP00000347836 |
| ENSP00000268058 | ENSP00000347979 |
| ENSP00000268058 | ENSP00000348551 |
| ENSP00000268058 | ENSP00000351407 |
| ENSP00000268058 | ENSP00000353622 |
| ENSP00000268058 | ENSP00000354558 |
| ENSP00000268058 | ENSP00000355153 |
| ENSP00000268058 | ENSP00000357965 |
| ENSP00000268058 | ENSP00000360116 |
| ENSP00000268058 | ENSP00000363676 |
| ENSP00000268058 | ENSP00000364320 |
| ENSP00000268058 | ENSP00000365877 |
| ENSP00000268058 | ENSP00000366607 |
| ENSP00000268058 | ENSP00000367797 |
| ENSP00000268058 | ENSP00000376611 |
| ENSP00000268058 | ENSP00000376903 |
| ENSP00000268058 | ENSP00000381045 |
| ENSP00000268058 | ENSP00000384048 |
| ENSP00000268058 | ENSP00000396704 |
| ENSP00000268058 | ENSP00000396876 |
| ENSP00000268058 | ENSP00000402527 |
| ENSP00000268058 | ENSP00000404623 |
| ENSP00000268058 | ENSP00000417281 |
| ENSP00000268124 | ENSP00000290429 |
| ENSP00000268124 | ENSP00000299206 |
| ENSP00000268124 | ENSP00000300738 |

|                 |                 |
|-----------------|-----------------|
| ENSP00000268124 | ENSP00000322570 |
| ENSP00000268124 | ENSP00000351697 |
| ENSP00000268124 | ENSP00000360216 |
| ENSP00000268124 | ENSP00000361310 |
| ENSP00000268124 | ENSP00000368349 |
| ENSP00000268164 | ENSP00000399436 |
| ENSP00000268182 | ENSP00000276326 |
| ENSP00000268182 | ENSP00000282441 |
| ENSP00000268182 | ENSP00000285873 |
| ENSP00000268182 | ENSP00000286835 |
| ENSP00000268182 | ENSP00000296733 |
| ENSP00000268182 | ENSP00000298910 |
| ENSP00000268182 | ENSP00000300648 |
| ENSP00000268182 | ENSP00000305785 |
| ENSP00000268182 | ENSP00000307272 |
| ENSP00000268182 | ENSP00000315615 |
| ENSP00000268182 | ENSP00000322608 |
| ENSP00000268182 | ENSP00000326514 |
| ENSP00000268182 | ENSP00000329466 |
| ENSP00000268182 | ENSP00000337088 |
| ENSP00000268182 | ENSP00000344456 |
| ENSP00000268182 | ENSP00000348163 |
| ENSP00000268182 | ENSP00000349016 |
| ENSP00000268182 | ENSP00000351015 |
| ENSP00000268182 | ENSP00000351665 |
| ENSP00000268182 | ENSP00000354927 |
| ENSP00000268182 | ENSP00000356146 |
| ENSP00000268182 | ENSP00000356530 |
| ENSP00000268182 | ENSP00000358994 |
| ENSP00000268182 | ENSP00000360076 |
| ENSP00000268182 | ENSP00000360532 |
| ENSP00000268182 | ENSP00000360922 |
| ENSP00000268182 | ENSP00000364403 |
| ENSP00000268182 | ENSP00000368190 |
| ENSP00000268182 | ENSP00000368797 |
| ENSP00000268182 | ENSP00000378529 |
| ENSP00000268182 | ENSP00000382177 |
| ENSP00000268182 | ENSP00000384675 |
| ENSP00000268182 | ENSP00000391249 |
| ENSP00000268182 | ENSP00000397598 |
| ENSP00000268206 | ENSP00000268661 |
| ENSP00000268206 | ENSP00000270625 |
| ENSP00000268206 | ENSP00000272418 |
| ENSP00000268206 | ENSP00000274712 |
| ENSP00000268206 | ENSP00000278572 |
| ENSP00000268206 | ENSP00000284719 |

|                 |                 |
|-----------------|-----------------|
| ENSP00000268206 | ENSP00000288937 |
| ENSP00000268206 | ENSP00000295488 |
| ENSP00000268206 | ENSP00000296674 |
| ENSP00000268206 | ENSP00000297908 |
| ENSP00000268206 | ENSP00000298283 |
| ENSP00000268206 | ENSP00000300151 |
| ENSP00000268206 | ENSP00000302160 |
| ENSP00000268206 | ENSP00000302896 |
| ENSP00000268206 | ENSP00000306548 |
| ENSP00000268206 | ENSP00000307853 |
| ENSP00000268206 | ENSP00000308897 |
| ENSP00000268206 | ENSP00000309474 |
| ENSP00000268206 | ENSP00000310448 |
| ENSP00000268206 | ENSP00000310520 |
| ENSP00000268206 | ENSP00000311028 |
| ENSP00000268206 | ENSP00000311430 |
| ENSP00000268206 | ENSP00000312735 |
| ENSP00000268206 | ENSP00000315379 |
| ENSP00000268206 | ENSP00000317376 |
| ENSP00000268206 | ENSP00000318646 |
| ENSP00000268206 | ENSP00000318861 |
| ENSP00000268206 | ENSP00000321320 |
| ENSP00000268206 | ENSP00000325448 |
| ENSP00000268206 | ENSP00000326981 |
| ENSP00000268206 | ENSP00000335321 |
| ENSP00000268206 | ENSP00000336606 |
| ENSP00000268206 | ENSP00000336702 |
| ENSP00000268206 | ENSP00000339795 |
| ENSP00000268206 | ENSP00000340305 |
| ENSP00000268206 | ENSP00000341082 |
| ENSP00000268206 | ENSP00000341885 |
| ENSP00000268206 | ENSP00000343557 |
| ENSP00000268206 | ENSP00000346015 |
| ENSP00000268206 | ENSP00000346022 |
| ENSP00000268206 | ENSP00000346067 |
| ENSP00000268206 | ENSP00000351137 |
| ENSP00000268206 | ENSP00000354125 |
| ENSP00000268206 | ENSP00000354525 |
| ENSP00000268206 | ENSP00000354739 |
| ENSP00000268206 | ENSP00000356811 |
| ENSP00000268206 | ENSP00000357631 |
| ENSP00000268206 | ENSP00000358554 |
| ENSP00000268206 | ENSP00000359345 |
| ENSP00000268206 | ENSP00000359454 |
| ENSP00000268206 | ENSP00000362036 |
| ENSP00000268206 | ENSP00000362110 |

|                 |                 |
|-----------------|-----------------|
| ENSP00000268206 | ENSP00000363018 |
| ENSP00000268206 | ENSP00000363559 |
| ENSP00000268206 | ENSP00000363676 |
| ENSP00000268206 | ENSP00000364289 |
| ENSP00000268206 | ENSP00000364320 |
| ENSP00000268206 | ENSP00000366557 |
| ENSP00000268206 | ENSP00000373404 |
| ENSP00000268206 | ENSP00000375730 |
| ENSP00000268206 | ENSP00000376973 |
| ENSP00000268206 | ENSP00000377486 |
| ENSP00000268206 | ENSP00000377865 |
| ENSP00000268206 | ENSP00000379339 |
| ENSP00000268206 | ENSP00000387006 |
| ENSP00000268206 | ENSP00000388330 |
| ENSP00000268206 | ENSP00000389103 |
| ENSP00000268206 | ENSP00000393241 |
| ENSP00000268206 | ENSP00000393953 |
| ENSP00000268206 | ENSP00000403175 |
| ENSP00000268206 | ENSP00000412583 |
| ENSP00000268206 | ENSP00000416110 |
| ENSP00000268206 | ENSP00000417229 |
| ENSP00000268206 | ENSP00000419599 |
| ENSP00000268206 | ENSP00000420714 |
| ENSP00000268251 | ENSP00000300574 |
| ENSP00000268251 | ENSP00000310623 |
| ENSP00000268251 | ENSP00000350928 |
| ENSP00000268251 | ENSP00000356104 |
| ENSP00000268251 | ENSP00000359518 |
| ENSP00000268251 | ENSP00000362298 |
| ENSP00000268251 | ENSP00000370611 |
| ENSP00000268379 | ENSP00000270538 |
| ENSP00000268379 | ENSP00000271373 |
| ENSP00000268379 | ENSP00000274787 |
| ENSP00000268379 | ENSP00000282050 |
| ENSP00000268379 | ENSP00000283429 |
| ENSP00000268379 | ENSP00000285083 |
| ENSP00000268379 | ENSP00000287022 |
| ENSP00000268379 | ENSP00000290299 |
| ENSP00000268379 | ENSP00000295767 |
| ENSP00000268379 | ENSP00000296674 |
| ENSP00000268379 | ENSP00000297564 |
| ENSP00000268379 | ENSP00000298852 |
| ENSP00000268379 | ENSP00000299335 |
| ENSP00000268379 | ENSP00000299767 |
| ENSP00000268379 | ENSP00000301585 |
| ENSP00000268379 | ENSP00000307786 |

|                 |                 |
|-----------------|-----------------|
| ENSP00000268379 | ENSP00000309565 |
| ENSP00000268379 | ENSP00000314380 |
| ENSP00000268379 | ENSP00000317159 |
| ENSP00000268379 | ENSP00000317334 |
| ENSP00000268379 | ENSP00000317780 |
| ENSP00000268379 | ENSP00000320236 |
| ENSP00000268379 | ENSP00000323046 |
| ENSP00000268379 | ENSP00000325677 |
| ENSP00000268379 | ENSP00000328940 |
| ENSP00000268379 | ENSP00000329466 |
| ENSP00000268379 | ENSP00000332887 |
| ENSP00000268379 | ENSP00000337838 |
| ENSP00000268379 | ENSP00000338293 |
| ENSP00000268379 | ENSP00000338345 |
| ENSP00000268379 | ENSP00000339933 |
| ENSP00000268379 | ENSP00000340019 |
| ENSP00000268379 | ENSP00000346067 |
| ENSP00000268379 | ENSP00000349142 |
| ENSP00000268379 | ENSP00000353698 |
| ENSP00000268379 | ENSP00000354499 |
| ENSP00000268379 | ENSP00000354554 |
| ENSP00000268379 | ENSP00000354876 |
| ENSP00000268379 | ENSP00000354982 |
| ENSP00000268379 | ENSP00000355572 |
| ENSP00000268379 | ENSP00000358042 |
| ENSP00000268379 | ENSP00000358695 |
| ENSP00000268379 | ENSP00000359067 |
| ENSP00000268379 | ENSP00000359127 |
| ENSP00000268379 | ENSP00000361042 |
| ENSP00000268379 | ENSP00000361207 |
| ENSP00000268379 | ENSP00000361433 |
| ENSP00000268379 | ENSP00000363018 |
| ENSP00000268379 | ENSP00000365243 |
| ENSP00000268379 | ENSP00000365766 |
| ENSP00000268379 | ENSP00000367923 |
| ENSP00000268379 | ENSP00000367934 |
| ENSP00000268379 | ENSP00000368523 |
| ENSP00000268379 | ENSP00000377527 |
| ENSP00000268379 | ENSP00000387262 |
| ENSP00000268379 | ENSP00000392985 |
| ENSP00000268379 | ENSP00000404381 |
| ENSP00000268459 | ENSP00000322304 |
| ENSP00000268459 | ENSP00000344456 |
| ENSP00000268459 | ENSP00000346155 |
| ENSP00000268459 | ENSP00000351605 |
| ENSP00000268459 | ENSP00000410715 |



|                 |                 |
|-----------------|-----------------|
| ENSP00000268482 | ENSP00000268483 |
| ENSP00000268482 | ENSP00000268802 |
| ENSP00000268482 | ENSP00000296215 |
| ENSP00000268482 | ENSP00000297151 |
| ENSP00000268482 | ENSP00000297990 |
| ENSP00000268482 | ENSP00000300086 |
| ENSP00000268482 | ENSP00000301740 |
| ENSP00000268482 | ENSP00000301764 |
| ENSP00000268482 | ENSP00000303191 |
| ENSP00000268482 | ENSP00000304350 |
| ENSP00000268482 | ENSP00000304370 |
| ENSP00000268482 | ENSP00000305790 |
| ENSP00000268482 | ENSP00000310448 |
| ENSP00000268482 | ENSP00000312981 |
| ENSP00000268482 | ENSP00000315379 |
| ENSP00000268482 | ENSP00000315674 |
| ENSP00000268482 | ENSP00000315859 |
| ENSP00000268482 | ENSP00000324122 |
| ENSP00000268482 | ENSP00000326806 |
| ENSP00000268482 | ENSP00000328854 |
| ENSP00000268482 | ENSP00000329466 |
| ENSP00000268482 | ENSP00000331817 |
| ENSP00000268482 | ENSP00000331907 |
| ENSP00000268482 | ENSP00000335321 |
| ENSP00000268482 | ENSP00000339723 |
| ENSP00000268482 | ENSP00000343557 |
| ENSP00000268482 | ENSP00000346022 |
| ENSP00000268482 | ENSP00000351137 |
| ENSP00000268482 | ENSP00000351492 |
| ENSP00000268482 | ENSP00000352738 |
| ENSP00000268482 | ENSP00000355541 |
| ENSP00000268482 | ENSP00000358812 |
| ENSP00000268482 | ENSP00000360031 |
| ENSP00000268482 | ENSP00000360497 |
| ENSP00000268482 | ENSP00000360532 |
| ENSP00000268482 | ENSP00000361557 |
| ENSP00000268482 | ENSP00000361577 |
| ENSP00000268482 | ENSP00000362110 |
| ENSP00000268482 | ENSP00000362936 |
| ENSP00000268482 | ENSP00000363313 |
| ENSP00000268482 | ENSP00000364289 |
| ENSP00000268482 | ENSP00000366135 |
| ENSP00000268482 | ENSP00000366557 |
| ENSP00000268482 | ENSP00000366829 |
| ENSP00000268482 | ENSP00000367835 |
| ENSP00000268482 | ENSP00000370222 |

|                 |                 |
|-----------------|-----------------|
| ENSP00000268482 | ENSP00000370460 |
| ENSP00000268482 | ENSP00000371169 |
| ENSP00000268482 | ENSP00000376973 |
| ENSP00000268482 | ENSP00000383059 |
| ENSP00000268482 | ENSP00000387006 |
| ENSP00000268482 | ENSP00000391432 |
| ENSP00000268483 | ENSP00000274712 |
| ENSP00000268483 | ENSP00000278572 |
| ENSP00000268483 | ENSP00000292180 |
| ENSP00000268483 | ENSP00000300146 |
| ENSP00000268483 | ENSP00000300413 |
| ENSP00000268483 | ENSP00000302160 |
| ENSP00000268483 | ENSP00000304350 |
| ENSP00000268483 | ENSP00000305790 |
| ENSP00000268483 | ENSP00000310448 |
| ENSP00000268483 | ENSP00000310596 |
| ENSP00000268483 | ENSP00000315035 |
| ENSP00000268483 | ENSP00000315379 |
| ENSP00000268483 | ENSP00000318861 |
| ENSP00000268483 | ENSP00000319341 |
| ENSP00000268483 | ENSP00000324122 |
| ENSP00000268483 | ENSP00000332103 |
| ENSP00000268483 | ENSP00000335321 |
| ENSP00000268483 | ENSP00000337405 |
| ENSP00000268483 | ENSP00000342374 |
| ENSP00000268483 | ENSP00000348010 |
| ENSP00000268483 | ENSP00000348602 |
| ENSP00000268483 | ENSP00000357880 |
| ENSP00000268483 | ENSP00000361577 |
| ENSP00000268483 | ENSP00000362110 |
| ENSP00000268483 | ENSP00000364813 |
| ENSP00000268483 | ENSP00000372883 |
| ENSP00000268483 | ENSP00000375881 |
| ENSP00000268483 | ENSP00000403345 |
| ENSP00000268483 | ENSP00000406280 |
| ENSP00000268483 | ENSP00000412566 |
| ENSP00000268483 | ENSP00000414006 |
| ENSP00000268483 | ENSP00000414634 |
| ENSP00000268489 | ENSP00000278886 |
| ENSP00000268533 | ENSP00000302160 |
| ENSP00000268533 | ENSP00000311876 |
| ENSP00000268533 | ENSP00000360782 |
| ENSP00000268533 | ENSP00000361993 |
| ENSP00000268533 | ENSP00000364212 |
| ENSP00000268605 | ENSP00000276414 |
| ENSP00000268605 | ENSP00000276603 |

|                 |                 |
|-----------------|-----------------|
| ENSP00000268605 | ENSP00000293288 |
| ENSP00000268605 | ENSP00000300086 |
| ENSP00000268605 | ENSP00000301838 |
| ENSP00000268605 | ENSP00000312664 |
| ENSP00000268605 | ENSP00000323511 |
| ENSP00000268605 | ENSP00000341268 |
| ENSP00000268605 | ENSP00000347979 |
| ENSP00000268605 | ENSP00000348307 |
| ENSP00000268605 | ENSP00000349022 |
| ENSP00000268605 | ENSP00000350249 |
| ENSP00000268605 | ENSP00000386394 |
| ENSP00000268605 | ENSP00000416959 |
| ENSP00000268616 | ENSP00000268802 |
| ENSP00000268616 | ENSP00000278572 |
| ENSP00000268616 | ENSP00000286835 |
| ENSP00000268616 | ENSP00000300413 |
| ENSP00000268616 | ENSP00000307889 |
| ENSP00000268616 | ENSP00000309334 |
| ENSP00000268616 | ENSP00000317992 |
| ENSP00000268616 | ENSP00000319341 |
| ENSP00000268616 | ENSP00000331817 |
| ENSP00000268616 | ENSP00000338862 |
| ENSP00000268616 | ENSP00000339529 |
| ENSP00000268616 | ENSP00000346015 |
| ENSP00000268616 | ENSP00000346050 |
| ENSP00000268616 | ENSP00000346088 |
| ENSP00000268616 | ENSP00000356146 |
| ENSP00000268616 | ENSP00000362900 |
| ENSP00000268616 | ENSP00000363676 |
| ENSP00000268616 | ENSP00000366519 |
| ENSP00000268616 | ENSP00000377640 |
| ENSP00000268616 | ENSP00000377793 |
| ENSP00000268616 | ENSP00000378160 |
| ENSP00000268616 | ENSP00000379888 |
| ENSP00000268616 | ENSP00000380495 |
| ENSP00000268616 | ENSP00000382392 |
| ENSP00000268616 | ENSP00000386717 |
| ENSP00000268638 | ENSP00000299259 |
| ENSP00000268638 | ENSP00000304102 |
| ENSP00000268638 | ENSP00000350512 |
| ENSP00000268638 | ENSP00000364895 |
| ENSP00000268638 | ENSP00000374455 |
| ENSP00000268638 | ENSP00000377218 |
| ENSP00000268661 | ENSP00000270625 |
| ENSP00000268661 | ENSP00000272418 |
| ENSP00000268661 | ENSP00000272542 |

|                 |                 |
|-----------------|-----------------|
| ENSP00000268661 | ENSP00000274242 |
| ENSP00000268661 | ENSP00000274606 |
| ENSP00000268661 | ENSP00000274849 |
| ENSP00000268661 | ENSP00000278572 |
| ENSP00000268661 | ENSP00000278856 |
| ENSP00000268661 | ENSP00000287038 |
| ENSP00000268661 | ENSP00000288937 |
| ENSP00000268661 | ENSP00000289371 |
| ENSP00000268661 | ENSP00000294189 |
| ENSP00000268661 | ENSP00000296411 |
| ENSP00000268661 | ENSP00000296577 |
| ENSP00000268661 | ENSP00000296802 |
| ENSP00000268661 | ENSP00000296805 |
| ENSP00000268661 | ENSP00000297908 |
| ENSP00000268661 | ENSP00000297990 |
| ENSP00000268661 | ENSP00000298283 |
| ENSP00000268661 | ENSP00000298746 |
| ENSP00000268661 | ENSP00000300151 |
| ENSP00000268661 | ENSP00000302886 |
| ENSP00000268661 | ENSP00000302896 |
| ENSP00000268661 | ENSP00000305702 |
| ENSP00000268661 | ENSP00000306548 |
| ENSP00000268661 | ENSP00000307525 |
| ENSP00000268661 | ENSP00000307889 |
| ENSP00000268661 | ENSP00000308897 |
| ENSP00000268661 | ENSP00000309334 |
| ENSP00000268661 | ENSP00000309433 |
| ENSP00000268661 | ENSP00000309830 |
| ENSP00000268661 | ENSP00000310042 |
| ENSP00000268661 | ENSP00000311028 |
| ENSP00000268661 | ENSP00000311430 |
| ENSP00000268661 | ENSP00000312066 |
| ENSP00000268661 | ENSP00000312311 |
| ENSP00000268661 | ENSP00000314949 |
| ENSP00000268661 | ENSP00000317376 |
| ENSP00000268661 | ENSP00000317992 |
| ENSP00000268661 | ENSP00000318374 |
| ENSP00000268661 | ENSP00000318646 |
| ENSP00000268661 | ENSP00000322396 |
| ENSP00000268661 | ENSP00000322419 |
| ENSP00000268661 | ENSP00000323858 |
| ENSP00000268661 | ENSP00000325312 |
| ENSP00000268661 | ENSP00000326981 |
| ENSP00000268661 | ENSP00000328464 |
| ENSP00000268661 | ENSP00000328690 |
| ENSP00000268661 | ENSP00000336702 |

|                 |                 |
|-----------------|-----------------|
| ENSP00000268661 | ENSP00000338573 |
| ENSP00000268661 | ENSP00000338862 |
| ENSP00000268661 | ENSP00000339095 |
| ENSP00000268661 | ENSP00000339145 |
| ENSP00000268661 | ENSP00000339795 |
| ENSP00000268661 | ENSP00000341885 |
| ENSP00000268661 | ENSP00000342181 |
| ENSP00000268661 | ENSP00000343392 |
| ENSP00000268661 | ENSP00000345096 |
| ENSP00000268661 | ENSP00000345156 |
| ENSP00000268661 | ENSP00000346015 |
| ENSP00000268661 | ENSP00000346022 |
| ENSP00000268661 | ENSP00000346027 |
| ENSP00000268661 | ENSP00000346037 |
| ENSP00000268661 | ENSP00000346050 |
| ENSP00000268661 | ENSP00000346088 |
| ENSP00000268661 | ENSP00000346120 |
| ENSP00000268661 | ENSP00000346725 |
| ENSP00000268661 | ENSP00000348596 |
| ENSP00000268661 | ENSP00000351596 |
| ENSP00000268661 | ENSP00000352738 |
| ENSP00000268661 | ENSP00000354040 |
| ENSP00000268661 | ENSP00000354125 |
| ENSP00000268661 | ENSP00000354525 |
| ENSP00000268661 | ENSP00000354739 |
| ENSP00000268661 | ENSP00000356290 |
| ENSP00000268661 | ENSP00000358563 |
| ENSP00000268661 | ENSP00000359345 |
| ENSP00000268661 | ENSP00000359688 |
| ENSP00000268661 | ENSP00000359939 |
| ENSP00000268661 | ENSP00000360031 |
| ENSP00000268661 | ENSP00000360412 |
| ENSP00000268661 | ENSP00000360828 |
| ENSP00000268661 | ENSP00000361076 |
| ENSP00000268661 | ENSP00000361465 |
| ENSP00000268661 | ENSP00000361982 |
| ENSP00000268661 | ENSP00000362153 |
| ENSP00000268661 | ENSP00000362744 |
| ENSP00000268661 | ENSP00000363018 |
| ENSP00000268661 | ENSP00000363559 |
| ENSP00000268661 | ENSP00000363676 |
| ENSP00000268661 | ENSP00000364320 |
| ENSP00000268661 | ENSP00000365806 |
| ENSP00000268661 | ENSP00000366519 |
| ENSP00000268661 | ENSP00000367024 |
| ENSP00000268661 | ENSP00000369757 |

|                 |                 |
|-----------------|-----------------|
| ENSP00000268661 | ENSP00000369965 |
| ENSP00000268661 | ENSP00000373090 |
| ENSP00000268661 | ENSP00000373404 |
| ENSP00000268661 | ENSP00000374390 |
| ENSP00000268661 | ENSP00000375730 |
| ENSP00000268661 | ENSP00000377486 |
| ENSP00000268661 | ENSP00000377617 |
| ENSP00000268661 | ENSP00000377640 |
| ENSP00000268661 | ENSP00000377865 |
| ENSP00000268661 | ENSP00000378160 |
| ENSP00000268661 | ENSP00000379888 |
| ENSP00000268661 | ENSP00000380156 |
| ENSP00000268661 | ENSP00000380495 |
| ENSP00000268661 | ENSP00000380982 |
| ENSP00000268661 | ENSP00000382392 |
| ENSP00000268661 | ENSP00000385903 |
| ENSP00000268661 | ENSP00000386717 |
| ENSP00000268661 | ENSP00000389103 |
| ENSP00000268661 | ENSP00000392859 |
| ENSP00000268661 | ENSP00000393393 |
| ENSP00000268661 | ENSP00000394290 |
| ENSP00000268661 | ENSP00000402338 |
| ENSP00000268661 | ENSP00000403576 |
| ENSP00000268661 | ENSP00000403817 |
| ENSP00000268661 | ENSP00000409074 |
| ENSP00000268661 | ENSP00000409367 |
| ENSP00000268661 | ENSP00000411162 |
| ENSP00000268661 | ENSP00000414321 |
| ENSP00000268661 | ENSP00000417229 |
| ENSP00000268661 | ENSP00000417763 |
| ENSP00000268668 | ENSP00000277865 |
| ENSP00000268668 | ENSP00000282541 |
| ENSP00000268668 | ENSP00000298552 |
| ENSP00000268668 | ENSP00000312671 |
| ENSP00000268668 | ENSP00000317790 |
| ENSP00000268668 | ENSP00000341838 |
| ENSP00000268668 | ENSP00000356972 |
| ENSP00000268668 | ENSP00000357484 |
| ENSP00000268668 | ENSP00000361824 |
| ENSP00000268668 | ENSP00000364524 |
| ENSP00000268668 | ENSP00000367408 |
| ENSP00000268668 | ENSP00000379394 |
| ENSP00000268668 | ENSP00000382064 |
| ENSP00000268668 | ENSP00000388841 |
| ENSP00000268676 | ENSP00000345892 |
| ENSP00000268676 | ENSP00000374455 |

|                 |                 |
|-----------------|-----------------|
| ENSP00000268676 | ENSP00000389913 |
| ENSP00000268679 | ENSP00000294339 |
| ENSP00000268679 | ENSP00000302216 |
| ENSP00000268679 | ENSP00000331057 |
| ENSP00000268679 | ENSP00000334061 |
| ENSP00000268679 | ENSP00000348551 |
| ENSP00000268679 | ENSP00000351250 |
| ENSP00000268679 | ENSP00000353622 |
| ENSP00000268679 | ENSP00000367972 |
| ENSP00000268679 | ENSP00000392466 |
| ENSP00000268699 | ENSP00000311505 |
| ENSP00000268711 | ENSP00000269397 |
| ENSP00000268711 | ENSP00000272645 |
| ENSP00000268711 | ENSP00000281928 |
| ENSP00000268711 | ENSP00000282007 |
| ENSP00000268711 | ENSP00000282892 |
| ENSP00000268711 | ENSP00000286317 |
| ENSP00000268711 | ENSP00000290663 |
| ENSP00000268711 | ENSP00000292035 |
| ENSP00000268711 | ENSP00000293371 |
| ENSP00000268711 | ENSP00000293777 |
| ENSP00000268711 | ENSP00000295685 |
| ENSP00000268711 | ENSP00000296930 |
| ENSP00000268711 | ENSP00000297185 |
| ENSP00000268711 | ENSP00000297347 |
| ENSP00000268711 | ENSP00000300413 |
| ENSP00000268711 | ENSP00000300648 |
| ENSP00000268711 | ENSP00000300651 |
| ENSP00000268711 | ENSP00000301788 |
| ENSP00000268711 | ENSP00000312735 |
| ENSP00000268711 | ENSP00000314949 |
| ENSP00000268711 | ENSP00000323720 |
| ENSP00000268711 | ENSP00000325612 |
| ENSP00000268711 | ENSP00000326767 |
| ENSP00000268711 | ENSP00000334061 |
| ENSP00000268711 | ENSP00000335261 |
| ENSP00000268711 | ENSP00000337340 |
| ENSP00000268711 | ENSP00000339957 |
| ENSP00000268711 | ENSP00000340019 |
| ENSP00000268711 | ENSP00000342343 |
| ENSP00000268711 | ENSP00000343745 |
| ENSP00000268711 | ENSP00000348610 |
| ENSP00000268711 | ENSP00000354681 |
| ENSP00000268711 | ENSP00000357047 |
| ENSP00000268711 | ENSP00000357907 |
| ENSP00000268711 | ENSP00000359727 |

|                 |                 |
|-----------------|-----------------|
| ENSP00000268711 | ENSP00000360519 |
| ENSP00000268711 | ENSP00000362948 |
| ENSP00000268711 | ENSP00000363193 |
| ENSP00000268711 | ENSP00000370119 |
| ENSP00000268711 | ENSP00000403852 |
| ENSP00000268717 | ENSP00000270708 |
| ENSP00000268717 | ENSP00000288602 |
| ENSP00000268717 | ENSP00000299259 |
| ENSP00000268717 | ENSP00000301764 |
| ENSP00000268717 | ENSP00000304102 |
| ENSP00000268717 | ENSP00000304822 |
| ENSP00000268717 | ENSP00000318944 |
| ENSP00000268717 | ENSP00000325794 |
| ENSP00000268717 | ENSP00000332681 |
| ENSP00000268717 | ENSP00000341030 |
| ENSP00000268717 | ENSP00000342755 |
| ENSP00000268717 | ENSP00000344456 |
| ENSP00000268717 | ENSP00000346340 |
| ENSP00000268717 | ENSP00000348157 |
| ENSP00000268717 | ENSP00000350512 |
| ENSP00000268717 | ENSP00000352928 |
| ENSP00000268717 | ENSP00000356438 |
| ENSP00000268717 | ENSP00000356641 |
| ENSP00000268717 | ENSP00000358854 |
| ENSP00000268717 | ENSP00000362110 |
| ENSP00000268717 | ENSP00000364578 |
| ENSP00000268717 | ENSP00000384109 |
| ENSP00000268719 | ENSP00000282077 |
| ENSP00000268719 | ENSP00000294724 |
| ENSP00000268719 | ENSP00000301463 |
| ENSP00000268719 | ENSP00000302830 |
| ENSP00000268719 | ENSP00000307889 |
| ENSP00000268719 | ENSP00000315791 |
| ENSP00000268719 | ENSP00000348010 |
| ENSP00000268719 | ENSP00000351221 |
| ENSP00000268720 | ENSP00000274030 |
| ENSP00000268720 | ENSP00000348455 |
| ENSP00000268802 | ENSP00000269499 |
| ENSP00000268802 | ENSP00000283109 |
| ENSP00000268802 | ENSP00000285873 |
| ENSP00000268802 | ENSP00000296509 |
| ENSP00000268802 | ENSP00000296802 |
| ENSP00000268802 | ENSP00000298852 |
| ENSP00000268802 | ENSP00000301364 |
| ENSP00000268802 | ENSP00000302896 |
| ENSP00000268802 | ENSP00000305702 |



|                 |                 |
|-----------------|-----------------|
| ENSP00000268802 | ENSP00000310129 |
| ENSP00000268802 | ENSP00000311135 |
| ENSP00000268802 | ENSP00000314348 |
| ENSP00000268802 | ENSP00000318646 |
| ENSP00000268802 | ENSP00000326981 |
| ENSP00000268802 | ENSP00000327179 |
| ENSP00000268802 | ENSP00000337839 |
| ENSP00000268802 | ENSP00000339095 |
| ENSP00000268802 | ENSP00000342381 |
| ENSP00000268802 | ENSP00000346120 |
| ENSP00000268802 | ENSP00000347087 |
| ENSP00000268802 | ENSP00000348708 |
| ENSP00000268802 | ENSP00000355471 |
| ENSP00000268802 | ENSP00000356134 |
| ENSP00000268802 | ENSP00000356548 |
| ENSP00000268802 | ENSP00000358812 |
| ENSP00000268802 | ENSP00000360031 |
| ENSP00000268802 | ENSP00000362334 |
| ENSP00000268802 | ENSP00000363308 |
| ENSP00000268802 | ENSP00000366557 |
| ENSP00000268802 | ENSP00000370222 |
| ENSP00000268802 | ENSP00000374390 |
| ENSP00000268802 | ENSP00000378529 |
| ENSP00000268802 | ENSP00000379888 |
| ENSP00000268802 | ENSP00000386212 |
| ENSP00000268802 | ENSP00000392601 |
| ENSP00000268802 | ENSP00000393241 |
| ENSP00000268802 | ENSP00000403175 |
| ENSP00000268802 | ENSP00000416110 |
| ENSP00000268835 | ENSP00000329715 |
| ENSP00000268835 | ENSP00000348442 |
| ENSP00000268835 | ENSP00000350512 |
| ENSP00000268957 | ENSP00000273064 |
| ENSP00000268957 | ENSP00000274255 |
| ENSP00000268957 | ENSP00000288840 |
| ENSP00000268957 | ENSP00000313829 |
| ENSP00000268957 | ENSP00000320949 |
| ENSP00000268957 | ENSP00000330060 |
| ENSP00000268957 | ENSP00000334061 |
| ENSP00000268957 | ENSP00000341551 |
| ENSP00000268957 | ENSP00000344456 |
| ENSP00000268957 | ENSP00000350990 |
| ENSP00000268957 | ENSP00000365439 |
| ENSP00000268957 | ENSP00000401371 |
| ENSP00000268981 | ENSP00000301021 |
| ENSP00000269025 | ENSP00000365005 |

|                 |                 |
|-----------------|-----------------|
| ENSP00000269033 | ENSP00000309629 |
| ENSP00000269033 | ENSP00000364320 |
| ENSP00000269053 | ENSP00000378326 |
| ENSP00000269122 | ENSP00000272322 |
| ENSP00000269122 | ENSP00000273398 |
| ENSP00000269122 | ENSP00000275015 |
| ENSP00000269122 | ENSP00000282050 |
| ENSP00000269122 | ENSP00000283195 |
| ENSP00000269122 | ENSP00000290158 |
| ENSP00000269122 | ENSP00000292385 |
| ENSP00000269122 | ENSP00000295025 |
| ENSP00000269122 | ENSP00000299138 |
| ENSP00000269122 | ENSP00000299259 |
| ENSP00000269122 | ENSP00000299767 |
| ENSP00000269122 | ENSP00000301843 |
| ENSP00000269122 | ENSP00000303507 |
| ENSP00000269122 | ENSP00000304592 |
| ENSP00000269122 | ENSP00000307567 |
| ENSP00000269122 | ENSP00000309610 |
| ENSP00000269122 | ENSP00000312411 |
| ENSP00000269122 | ENSP00000313059 |
| ENSP00000269122 | ENSP00000314129 |
| ENSP00000269122 | ENSP00000314499 |
| ENSP00000269122 | ENSP00000317790 |
| ENSP00000269122 | ENSP00000319977 |
| ENSP00000269122 | ENSP00000320543 |
| ENSP00000269122 | ENSP00000323377 |
| ENSP00000269122 | ENSP00000325369 |
| ENSP00000269122 | ENSP00000327077 |
| ENSP00000269122 | ENSP00000329466 |
| ENSP00000269122 | ENSP00000329715 |
| ENSP00000269122 | ENSP00000331201 |
| ENSP00000269122 | ENSP00000333018 |
| ENSP00000269122 | ENSP00000337478 |
| ENSP00000269122 | ENSP00000338345 |
| ENSP00000269122 | ENSP00000347184 |
| ENSP00000269122 | ENSP00000347314 |
| ENSP00000269122 | ENSP00000348128 |
| ENSP00000269122 | ENSP00000348602 |
| ENSP00000269122 | ENSP00000349131 |
| ENSP00000269122 | ENSP00000350199 |
| ENSP00000269122 | ENSP00000352257 |
| ENSP00000269122 | ENSP00000352603 |
| ENSP00000269122 | ENSP00000354061 |
| ENSP00000269122 | ENSP00000354519 |
| ENSP00000269122 | ENSP00000354681 |

|                 |                 |
|-----------------|-----------------|
| ENSP00000269122 | ENSP00000355629 |
| ENSP00000269122 | ENSP00000359067 |
| ENSP00000269122 | ENSP00000359484 |
| ENSP00000269122 | ENSP00000360183 |
| ENSP00000269122 | ENSP00000360798 |
| ENSP00000269122 | ENSP00000360992 |
| ENSP00000269122 | ENSP00000361824 |
| ENSP00000269122 | ENSP00000362105 |
| ENSP00000269122 | ENSP00000362399 |
| ENSP00000269122 | ENSP00000362727 |
| ENSP00000269122 | ENSP00000363349 |
| ENSP00000269122 | ENSP00000365233 |
| ENSP00000269122 | ENSP00000365891 |
| ENSP00000269122 | ENSP00000365943 |
| ENSP00000269122 | ENSP00000366746 |
| ENSP00000269122 | ENSP00000367841 |
| ENSP00000269122 | ENSP00000368818 |
| ENSP00000269122 | ENSP00000370719 |
| ENSP00000269122 | ENSP00000371341 |
| ENSP00000269122 | ENSP00000377148 |
| ENSP00000269122 | ENSP00000377527 |
| ENSP00000269122 | ENSP00000379607 |
| ENSP00000269122 | ENSP00000380921 |
| ENSP00000269122 | ENSP00000381891 |
| ENSP00000269122 | ENSP00000381932 |
| ENSP00000269122 | ENSP00000386156 |
| ENSP00000269122 | ENSP00000388340 |
| ENSP00000269122 | ENSP00000390783 |
| ENSP00000269122 | ENSP00000392617 |
| ENSP00000269122 | ENSP00000394869 |
| ENSP00000269122 | ENSP00000402240 |
| ENSP00000269122 | ENSP00000404247 |
| ENSP00000269122 | ENSP00000407487 |
| ENSP00000269122 | ENSP00000419126 |
| ENSP00000269127 | ENSP00000299424 |
| ENSP00000269127 | ENSP00000299601 |
| ENSP00000269127 | ENSP00000307684 |
| ENSP00000269127 | ENSP00000322180 |
| ENSP00000269127 | ENSP00000329933 |
| ENSP00000269127 | ENSP00000336842 |
| ENSP00000269127 | ENSP00000343190 |
| ENSP00000269127 | ENSP00000343741 |
| ENSP00000269127 | ENSP00000347733 |
| ENSP00000269127 | ENSP00000360515 |
| ENSP00000269127 | ENSP00000364289 |
| ENSP00000269127 | ENSP00000372023 |

|                 |                 |
|-----------------|-----------------|
| ENSP00000269127 | ENSP00000374280 |
| ENSP00000269127 | ENSP00000377262 |
| ENSP00000269127 | ENSP00000386759 |
| ENSP00000269143 | ENSP00000274680 |
| ENSP00000269143 | ENSP00000282050 |
| ENSP00000269143 | ENSP00000287295 |
| ENSP00000269143 | ENSP00000287936 |
| ENSP00000269143 | ENSP00000295890 |
| ENSP00000269143 | ENSP00000298569 |
| ENSP00000269143 | ENSP00000298852 |
| ENSP00000269143 | ENSP00000300145 |
| ENSP00000269143 | ENSP00000301585 |
| ENSP00000269143 | ENSP00000317780 |
| ENSP00000269143 | ENSP00000320309 |
| ENSP00000269143 | ENSP00000325448 |
| ENSP00000269143 | ENSP00000337127 |
| ENSP00000269143 | ENSP00000339435 |
| ENSP00000269143 | ENSP00000348554 |
| ENSP00000269143 | ENSP00000348577 |
| ENSP00000269143 | ENSP00000348886 |
| ENSP00000269143 | ENSP00000349142 |
| ENSP00000269143 | ENSP00000353826 |
| ENSP00000269143 | ENSP00000354554 |
| ENSP00000269143 | ENSP00000355231 |
| ENSP00000269143 | ENSP00000356329 |
| ENSP00000269143 | ENSP00000360270 |
| ENSP00000269143 | ENSP00000361845 |
| ENSP00000269143 | ENSP00000362576 |
| ENSP00000269143 | ENSP00000365766 |
| ENSP00000269143 | ENSP00000367498 |
| ENSP00000269143 | ENSP00000381891 |
| ENSP00000269143 | ENSP00000387262 |
| ENSP00000269159 | ENSP00000312870 |
| ENSP00000269159 | ENSP00000322570 |
| ENSP00000269159 | ENSP00000332513 |
| ENSP00000269159 | ENSP00000337838 |
| ENSP00000269159 | ENSP00000347948 |
| ENSP00000269197 | ENSP00000269385 |
| ENSP00000269197 | ENSP00000269397 |
| ENSP00000269197 | ENSP00000274031 |
| ENSP00000269197 | ENSP00000308750 |
| ENSP00000269197 | ENSP00000314311 |
| ENSP00000269197 | ENSP00000323074 |
| ENSP00000269197 | ENSP00000329097 |
| ENSP00000269197 | ENSP00000352463 |
| ENSP00000269197 | ENSP00000354526 |

|                 |                 |
|-----------------|-----------------|
| ENSP00000269197 | ENSP00000367570 |
| ENSP00000269197 | ENSP00000376204 |
| ENSP00000269197 | ENSP00000384490 |
| ENSP00000269197 | ENSP00000404658 |
| ENSP00000269197 | ENSP00000417132 |
| ENSP00000269214 | ENSP00000276014 |
| ENSP00000269214 | ENSP00000282516 |
| ENSP00000269214 | ENSP00000282572 |
| ENSP00000269214 | ENSP00000296273 |
| ENSP00000269214 | ENSP00000296509 |
| ENSP00000269214 | ENSP00000297338 |
| ENSP00000269214 | ENSP00000308699 |
| ENSP00000269214 | ENSP00000308944 |
| ENSP00000269214 | ENSP00000313171 |
| ENSP00000269214 | ENSP00000313851 |
| ENSP00000269214 | ENSP00000322570 |
| ENSP00000269214 | ENSP00000323439 |
| ENSP00000269214 | ENSP00000325017 |
| ENSP00000269214 | ENSP00000341382 |
| ENSP00000269214 | ENSP00000349049 |
| ENSP00000269214 | ENSP00000351697 |
| ENSP00000269214 | ENSP00000353332 |
| ENSP00000269214 | ENSP00000354720 |
| ENSP00000269214 | ENSP00000354957 |
| ENSP00000269214 | ENSP00000357965 |
| ENSP00000269214 | ENSP00000361310 |
| ENSP00000269214 | ENSP00000365877 |
| ENSP00000269214 | ENSP00000368349 |
| ENSP00000269214 | ENSP00000368438 |
| ENSP00000269214 | ENSP00000369411 |
| ENSP00000269214 | ENSP00000370151 |
| ENSP00000269214 | ENSP00000372689 |
| ENSP00000269216 | ENSP00000269385 |
| ENSP00000269216 | ENSP00000281092 |
| ENSP00000269216 | ENSP00000282728 |
| ENSP00000269216 | ENSP00000295079 |
| ENSP00000269216 | ENSP00000300146 |
| ENSP00000269216 | ENSP00000300651 |
| ENSP00000269216 | ENSP00000304689 |
| ENSP00000269216 | ENSP00000305958 |
| ENSP00000269216 | ENSP00000307023 |
| ENSP00000269216 | ENSP00000307208 |
| ENSP00000269216 | ENSP00000307900 |
| ENSP00000269216 | ENSP00000315859 |
| ENSP00000269216 | ENSP00000329357 |
| ENSP00000269216 | ENSP00000330836 |

|                 |                 |
|-----------------|-----------------|
| ENSP00000269216 | ENSP00000332353 |
| ENSP00000269216 | ENSP00000341551 |
| ENSP00000269216 | ENSP00000344401 |
| ENSP00000269216 | ENSP00000345096 |
| ENSP00000269216 | ENSP00000346879 |
| ENSP00000269216 | ENSP00000349213 |
| ENSP00000269216 | ENSP00000349393 |
| ENSP00000269216 | ENSP00000351015 |
| ENSP00000269216 | ENSP00000357113 |
| ENSP00000269216 | ENSP00000357348 |
| ENSP00000269216 | ENSP00000359691 |
| ENSP00000269216 | ENSP00000366843 |
| ENSP00000269216 | ENSP00000373272 |
| ENSP00000269216 | ENSP00000380054 |
| ENSP00000269216 | ENSP00000380414 |
| ENSP00000269216 | ENSP00000391723 |
| ENSP00000269216 | ENSP00000392466 |
| ENSP00000269216 | ENSP00000396620 |
| ENSP00000269216 | ENSP00000399968 |
| ENSP00000269221 | ENSP00000296137 |
| ENSP00000269280 | ENSP00000300589 |
| ENSP00000269280 | ENSP00000312664 |
| ENSP00000269280 | ENSP00000329623 |
| ENSP00000269280 | ENSP00000353059 |
| ENSP00000269280 | ENSP00000354159 |
| ENSP00000269280 | ENSP00000376849 |
| ENSP00000269346 | ENSP00000345530 |
| ENSP00000269385 | ENSP00000269397 |
| ENSP00000269385 | ENSP00000272286 |
| ENSP00000269385 | ENSP00000278412 |
| ENSP00000269385 | ENSP00000281928 |
| ENSP00000269385 | ENSP00000288985 |
| ENSP00000269385 | ENSP00000296930 |
| ENSP00000269385 | ENSP00000297689 |
| ENSP00000269385 | ENSP00000301364 |
| ENSP00000269385 | ENSP00000306999 |
| ENSP00000269385 | ENSP00000314311 |
| ENSP00000269385 | ENSP00000318195 |
| ENSP00000269385 | ENSP00000320340 |
| ENSP00000269385 | ENSP00000320485 |
| ENSP00000269385 | ENSP00000320917 |
| ENSP00000269385 | ENSP00000323687 |
| ENSP00000269385 | ENSP00000331817 |
| ENSP00000269385 | ENSP00000334474 |
| ENSP00000269385 | ENSP00000336856 |
| ENSP00000269385 | ENSP00000336868 |

|                 |                 |
|-----------------|-----------------|
| ENSP00000269385 | ENSP00000343535 |
| ENSP00000269385 | ENSP00000350848 |
| ENSP00000269385 | ENSP00000351250 |
| ENSP00000269385 | ENSP00000354040 |
| ENSP00000269385 | ENSP00000354478 |
| ENSP00000269385 | ENSP00000354730 |
| ENSP00000269385 | ENSP00000354850 |
| ENSP00000269385 | ENSP00000354995 |
| ENSP00000269385 | ENSP00000355011 |
| ENSP00000269385 | ENSP00000355205 |
| ENSP00000269385 | ENSP00000356548 |
| ENSP00000269385 | ENSP00000357965 |
| ENSP00000269385 | ENSP00000358812 |
| ENSP00000269385 | ENSP00000358862 |
| ENSP00000269385 | ENSP00000359321 |
| ENSP00000269385 | ENSP00000360922 |
| ENSP00000269385 | ENSP00000361287 |
| ENSP00000269385 | ENSP00000363193 |
| ENSP00000269385 | ENSP00000363787 |
| ENSP00000269385 | ENSP00000364839 |
| ENSP00000269385 | ENSP00000364895 |
| ENSP00000269385 | ENSP00000366271 |
| ENSP00000269385 | ENSP00000367787 |
| ENSP00000269385 | ENSP00000369695 |
| ENSP00000269385 | ENSP00000371634 |
| ENSP00000269385 | ENSP00000374213 |
| ENSP00000269385 | ENSP00000376204 |
| ENSP00000269385 | ENSP00000376534 |
| ENSP00000269385 | ENSP00000380982 |
| ENSP00000269385 | ENSP00000382392 |
| ENSP00000269385 | ENSP00000386759 |
| ENSP00000269385 | ENSP00000396439 |
| ENSP00000269385 | ENSP00000404121 |
| ENSP00000269385 | ENSP00000418734 |
| ENSP00000269389 | ENSP00000312027 |
| ENSP00000269397 | ENSP00000269468 |
| ENSP00000269397 | ENSP00000281092 |
| ENSP00000269397 | ENSP00000302501 |
| ENSP00000269397 | ENSP00000308750 |
| ENSP00000269397 | ENSP00000311825 |
| ENSP00000269397 | ENSP00000338345 |
| ENSP00000269397 | ENSP00000341024 |
| ENSP00000269397 | ENSP00000343535 |
| ENSP00000269397 | ENSP00000348089 |
| ENSP00000269397 | ENSP00000350297 |
| ENSP00000269397 | ENSP00000353793 |

|                 |                 |
|-----------------|-----------------|
| ENSP00000269397 | ENSP00000354720 |
| ENSP00000269397 | ENSP00000355922 |
| ENSP00000269397 | ENSP00000357643 |
| ENSP00000269397 | ENSP00000358862 |
| ENSP00000269397 | ENSP00000359321 |
| ENSP00000269397 | ENSP00000360621 |
| ENSP00000269397 | ENSP00000360992 |
| ENSP00000269397 | ENSP00000361287 |
| ENSP00000269397 | ENSP00000363787 |
| ENSP00000269397 | ENSP00000365877 |
| ENSP00000269397 | ENSP00000368349 |
| ENSP00000269397 | ENSP00000368438 |
| ENSP00000269397 | ENSP00000373566 |
| ENSP00000269397 | ENSP00000384490 |
| ENSP00000269397 | ENSP00000392028 |
| ENSP00000269397 | ENSP00000396439 |
| ENSP00000269397 | ENSP00000402515 |
| ENSP00000269397 | ENSP00000417132 |
| ENSP00000269397 | ENSP00000418734 |
| ENSP00000269466 | ENSP00000280701 |
| ENSP00000269466 | ENSP00000287675 |
| ENSP00000269466 | ENSP00000290429 |
| ENSP00000269466 | ENSP00000310042 |
| ENSP00000269466 | ENSP00000320488 |
| ENSP00000269466 | ENSP00000362171 |
| ENSP00000269466 | ENSP00000364320 |
| ENSP00000269468 | ENSP00000295066 |
| ENSP00000269468 | ENSP00000299601 |
| ENSP00000269468 | ENSP00000301280 |
| ENSP00000269468 | ENSP00000304593 |
| ENSP00000269468 | ENSP00000308466 |
| ENSP00000269468 | ENSP00000348799 |
| ENSP00000269468 | ENSP00000354848 |
| ENSP00000269468 | ENSP00000356405 |
| ENSP00000269468 | ENSP00000357887 |
| ENSP00000269468 | ENSP00000357965 |
| ENSP00000269468 | ENSP00000365877 |
| ENSP00000269468 | ENSP00000368438 |
| ENSP00000269468 | ENSP00000374213 |
| ENSP00000269468 | ENSP00000374280 |
| ENSP00000269468 | ENSP00000386759 |
| ENSP00000269468 | ENSP00000396749 |
| ENSP00000269468 | ENSP00000396976 |
| ENSP00000269485 | ENSP00000303148 |
| ENSP00000269485 | ENSP00000341243 |
| ENSP00000269485 | ENSP00000358335 |



|                 |                 |
|-----------------|-----------------|
| ENSP00000269499 | ENSP00000278572 |
| ENSP00000269499 | ENSP00000286835 |
| ENSP00000269499 | ENSP00000300413 |
| ENSP00000269499 | ENSP00000302478 |
| ENSP00000269499 | ENSP00000307889 |
| ENSP00000269499 | ENSP00000309334 |
| ENSP00000269499 | ENSP00000317992 |
| ENSP00000269499 | ENSP00000319341 |
| ENSP00000269499 | ENSP00000331817 |
| ENSP00000269499 | ENSP00000338862 |
| ENSP00000269499 | ENSP00000339529 |
| ENSP00000269499 | ENSP00000346015 |
| ENSP00000269499 | ENSP00000346050 |
| ENSP00000269499 | ENSP00000346088 |
| ENSP00000269499 | ENSP00000356146 |
| ENSP00000269499 | ENSP00000362900 |
| ENSP00000269499 | ENSP00000363676 |
| ENSP00000269499 | ENSP00000366519 |
| ENSP00000269499 | ENSP00000377640 |
| ENSP00000269499 | ENSP00000377793 |
| ENSP00000269499 | ENSP00000378160 |
| ENSP00000269499 | ENSP00000379888 |
| ENSP00000269499 | ENSP00000380495 |
| ENSP00000269499 | ENSP00000382392 |
| ENSP00000269499 | ENSP00000386717 |
| ENSP00000269582 | ENSP00000276603 |
| ENSP00000269582 | ENSP00000300086 |
| ENSP00000269701 | ENSP00000359100 |
| ENSP00000269701 | ENSP00000360532 |
| ENSP00000269703 | ENSP00000277010 |
| ENSP00000269703 | ENSP00000341662 |
| ENSP00000269703 | ENSP00000348762 |
| ENSP00000269856 | ENSP00000281708 |
| ENSP00000269856 | ENSP00000312411 |
| ENSP00000269856 | ENSP00000361707 |
| ENSP00000269856 | ENSP00000367459 |
| ENSP00000269932 | ENSP00000270708 |
| ENSP00000269932 | ENSP00000295709 |
| ENSP00000269932 | ENSP00000295901 |
| ENSP00000269967 | ENSP00000281708 |
| ENSP00000269967 | ENSP00000301764 |
| ENSP00000269967 | ENSP00000305790 |
| ENSP00000269967 | ENSP00000335321 |
| ENSP00000269967 | ENSP00000356541 |
| ENSP00000269967 | ENSP00000365439 |
| ENSP00000269980 | ENSP00000302830 |

|                 |                 |
|-----------------|-----------------|
| ENSP00000269980 | ENSP00000315693 |
| ENSP00000269980 | ENSP00000318351 |
| ENSP00000269980 | ENSP00000342056 |
| ENSP00000269980 | ENSP00000346453 |
| ENSP00000269980 | ENSP00000356405 |
| ENSP00000269980 | ENSP00000367637 |
| ENSP00000269980 | ENSP00000370377 |
| ENSP00000270066 | ENSP00000300917 |
| ENSP00000270066 | ENSP00000402515 |
| ENSP00000270112 | ENSP00000307272 |
| ENSP00000270112 | ENSP00000309629 |
| ENSP00000270112 | ENSP00000336740 |
| ENSP00000270139 | ENSP00000295408 |
| ENSP00000270139 | ENSP00000315768 |
| ENSP00000270139 | ENSP00000340944 |
| ENSP00000270139 | ENSP00000343957 |
| ENSP00000270139 | ENSP00000356346 |
| ENSP00000270139 | ENSP00000359206 |
| ENSP00000270176 | ENSP00000290231 |
| ENSP00000270176 | ENSP00000290949 |
| ENSP00000270176 | ENSP00000302790 |
| ENSP00000270176 | ENSP00000316032 |
| ENSP00000270176 | ENSP00000320488 |
| ENSP00000270176 | ENSP00000327821 |
| ENSP00000270176 | ENSP00000328079 |
| ENSP00000270176 | ENSP00000329419 |
| ENSP00000270176 | ENSP00000332247 |
| ENSP00000270176 | ENSP00000348577 |
| ENSP00000270176 | ENSP00000356737 |
| ENSP00000270176 | ENSP00000357048 |
| ENSP00000270176 | ENSP00000362171 |
| ENSP00000270176 | ENSP00000362576 |
| ENSP00000270176 | ENSP00000371155 |
| ENSP00000270176 | ENSP00000373770 |
| ENSP00000270223 | ENSP00000294008 |
| ENSP00000270223 | ENSP00000295897 |
| ENSP00000270223 | ENSP00000296028 |
| ENSP00000270223 | ENSP00000307491 |
| ENSP00000270223 | ENSP00000311028 |
| ENSP00000270223 | ENSP00000347988 |
| ENSP00000270223 | ENSP00000349486 |
| ENSP00000270223 | ENSP00000355599 |
| ENSP00000270223 | ENSP00000356972 |
| ENSP00000270223 | ENSP00000366156 |
| ENSP00000270223 | ENSP00000370517 |
| ENSP00000270223 | ENSP00000381863 |

|                 |                 |
|-----------------|-----------------|
| ENSP00000270223 | ENSP00000401121 |
| ENSP00000270223 | ENSP00000403359 |
| ENSP00000270225 | ENSP00000283195 |
| ENSP00000270225 | ENSP00000286428 |
| ENSP00000270225 | ENSP00000288532 |
| ENSP00000270225 | ENSP00000300648 |
| ENSP00000270225 | ENSP00000300738 |
| ENSP00000270225 | ENSP00000301788 |
| ENSP00000270225 | ENSP00000308944 |
| ENSP00000270225 | ENSP00000322242 |
| ENSP00000270225 | ENSP00000330343 |
| ENSP00000270225 | ENSP00000334474 |
| ENSP00000270225 | ENSP00000341189 |
| ENSP00000270225 | ENSP00000342381 |
| ENSP00000270225 | ENSP00000343023 |
| ENSP00000270225 | ENSP00000346566 |
| ENSP00000270225 | ENSP00000347345 |
| ENSP00000270225 | ENSP00000347978 |
| ENSP00000270225 | ENSP00000353622 |
| ENSP00000270225 | ENSP00000354742 |
| ENSP00000270225 | ENSP00000358478 |
| ENSP00000270225 | ENSP00000359939 |
| ENSP00000270225 | ENSP00000365773 |
| ENSP00000270225 | ENSP00000368332 |
| ENSP00000270225 | ENSP00000369038 |
| ENSP00000270225 | ENSP00000402084 |
| ENSP00000270257 | ENSP00000281950 |
| ENSP00000270257 | ENSP00000302160 |
| ENSP00000270257 | ENSP00000342374 |
| ENSP00000270257 | ENSP00000346037 |
| ENSP00000270257 | ENSP00000370083 |
| ENSP00000270257 | ENSP00000370119 |
| ENSP00000270257 | ENSP00000373363 |
| ENSP00000270257 | ENSP00000392270 |
| ENSP00000270257 | ENSP00000400591 |
| ENSP00000270257 | ENSP00000412566 |
| ENSP00000270458 | ENSP00000310003 |
| ENSP00000270538 | ENSP00000282050 |
| ENSP00000270538 | ENSP00000288602 |
| ENSP00000270538 | ENSP00000294008 |
| ENSP00000270538 | ENSP00000297185 |
| ENSP00000270538 | ENSP00000311430 |
| ENSP00000270538 | ENSP00000315693 |
| ENSP00000270538 | ENSP00000316240 |
| ENSP00000270538 | ENSP00000317159 |
| ENSP00000270538 | ENSP00000318115 |

|                 |                 |
|-----------------|-----------------|
| ENSP00000270538 | ENSP00000329558 |
| ENSP00000270538 | ENSP00000331479 |
| ENSP00000270538 | ENSP00000340019 |
| ENSP00000270538 | ENSP00000348886 |
| ENSP00000270538 | ENSP00000358695 |
| ENSP00000270538 | ENSP00000360782 |
| ENSP00000270538 | ENSP00000362041 |
| ENSP00000270538 | ENSP00000366179 |
| ENSP00000270538 | ENSP00000368066 |
| ENSP00000270538 | ENSP00000368523 |
| ENSP00000270538 | ENSP00000371451 |
| ENSP00000270538 | ENSP00000377640 |
| ENSP00000270538 | ENSP00000389934 |
| ENSP00000270583 | ENSP00000276603 |
| ENSP00000270583 | ENSP00000318195 |
| ENSP00000270583 | ENSP00000361949 |
| ENSP00000270583 | ENSP00000362900 |
| ENSP00000270625 | ENSP00000272418 |
| ENSP00000270625 | ENSP00000274311 |
| ENSP00000270625 | ENSP00000274606 |
| ENSP00000270625 | ENSP00000274849 |
| ENSP00000270625 | ENSP00000278572 |
| ENSP00000270625 | ENSP00000280190 |
| ENSP00000270625 | ENSP00000280557 |
| ENSP00000270625 | ENSP00000283109 |
| ENSP00000270625 | ENSP00000287038 |
| ENSP00000270625 | ENSP00000295930 |
| ENSP00000270625 | ENSP00000296674 |
| ENSP00000270625 | ENSP00000296792 |
| ENSP00000270625 | ENSP00000296802 |
| ENSP00000270625 | ENSP00000296805 |
| ENSP00000270625 | ENSP00000297908 |
| ENSP00000270625 | ENSP00000297990 |
| ENSP00000270625 | ENSP00000298283 |
| ENSP00000270625 | ENSP00000300151 |
| ENSP00000270625 | ENSP00000301364 |
| ENSP00000270625 | ENSP00000301585 |
| ENSP00000270625 | ENSP00000302896 |
| ENSP00000270625 | ENSP00000305702 |
| ENSP00000270625 | ENSP00000306548 |
| ENSP00000270625 | ENSP00000307889 |
| ENSP00000270625 | ENSP00000308897 |
| ENSP00000270625 | ENSP00000309334 |
| ENSP00000270625 | ENSP00000309433 |
| ENSP00000270625 | ENSP00000311028 |
| ENSP00000270625 | ENSP00000311430 |

|                 |                 |
|-----------------|-----------------|
| ENSP00000270625 | ENSP00000314348 |
| ENSP00000270625 | ENSP00000315674 |
| ENSP00000270625 | ENSP00000317376 |
| ENSP00000270625 | ENSP00000318646 |
| ENSP00000270625 | ENSP00000320917 |
| ENSP00000270625 | ENSP00000323856 |
| ENSP00000270625 | ENSP00000325376 |
| ENSP00000270625 | ENSP00000326981 |
| ENSP00000270625 | ENSP00000331019 |
| ENSP00000270625 | ENSP00000336702 |
| ENSP00000270625 | ENSP00000337127 |
| ENSP00000270625 | ENSP00000337839 |
| ENSP00000270625 | ENSP00000339095 |
| ENSP00000270625 | ENSP00000339795 |
| ENSP00000270625 | ENSP00000341885 |
| ENSP00000270625 | ENSP00000342300 |
| ENSP00000270625 | ENSP00000345096 |
| ENSP00000270625 | ENSP00000345156 |
| ENSP00000270625 | ENSP00000346050 |
| ENSP00000270625 | ENSP00000346067 |
| ENSP00000270625 | ENSP00000347087 |
| ENSP00000270625 | ENSP00000354125 |
| ENSP00000270625 | ENSP00000354525 |
| ENSP00000270625 | ENSP00000354739 |
| ENSP00000270625 | ENSP00000355471 |
| ENSP00000270625 | ENSP00000355866 |
| ENSP00000270625 | ENSP00000356134 |
| ENSP00000270625 | ENSP00000358140 |
| ENSP00000270625 | ENSP00000358812 |
| ENSP00000270625 | ENSP00000359345 |
| ENSP00000270625 | ENSP00000360031 |
| ENSP00000270625 | ENSP00000361076 |
| ENSP00000270625 | ENSP00000361465 |
| ENSP00000270625 | ENSP00000362036 |
| ENSP00000270625 | ENSP00000362688 |
| ENSP00000270625 | ENSP00000362744 |
| ENSP00000270625 | ENSP00000363018 |
| ENSP00000270625 | ENSP00000363308 |
| ENSP00000270625 | ENSP00000363642 |
| ENSP00000270625 | ENSP00000363676 |
| ENSP00000270625 | ENSP00000364320 |
| ENSP00000270625 | ENSP00000366557 |
| ENSP00000270625 | ENSP00000368565 |
| ENSP00000270625 | ENSP00000368790 |
| ENSP00000270625 | ENSP00000369757 |
| ENSP00000270625 | ENSP00000370258 |

|                 |                 |
|-----------------|-----------------|
| ENSP00000270625 | ENSP00000371101 |
| ENSP00000270625 | ENSP00000372445 |
| ENSP00000270625 | ENSP00000373404 |
| ENSP00000270625 | ENSP00000375730 |
| ENSP00000270625 | ENSP00000379339 |
| ENSP00000270625 | ENSP00000379607 |
| ENSP00000270625 | ENSP00000379888 |
| ENSP00000270625 | ENSP00000389103 |
| ENSP00000270625 | ENSP00000392859 |
| ENSP00000270625 | ENSP00000393241 |
| ENSP00000270625 | ENSP00000402338 |
| ENSP00000270625 | ENSP00000403175 |
| ENSP00000270625 | ENSP00000412583 |
| ENSP00000270625 | ENSP00000414321 |
| ENSP00000270625 | ENSP00000416110 |
| ENSP00000270625 | ENSP00000417229 |
| ENSP00000270708 | ENSP00000282003 |
| ENSP00000270708 | ENSP00000299259 |
| ENSP00000270708 | ENSP00000304822 |
| ENSP00000270708 | ENSP00000305459 |
| ENSP00000270708 | ENSP00000305958 |
| ENSP00000270708 | ENSP00000341030 |
| ENSP00000270708 | ENSP00000356290 |
| ENSP00000270708 | ENSP00000359484 |
| ENSP00000270708 | ENSP00000362824 |
| ENSP00000270708 | ENSP00000363734 |
| ENSP00000270708 | ENSP00000364578 |
| ENSP00000270708 | ENSP00000365131 |
| ENSP00000270708 | ENSP00000407487 |
| ENSP00000270708 | ENSP00000412319 |
| ENSP00000270776 | ENSP00000276603 |
| ENSP00000270776 | ENSP00000280605 |
| ENSP00000270776 | ENSP00000290332 |
| ENSP00000270776 | ENSP00000311505 |
| ENSP00000270776 | ENSP00000324792 |
| ENSP00000270776 | ENSP00000327070 |
| ENSP00000270776 | ENSP00000330343 |
| ENSP00000270776 | ENSP00000336927 |
| ENSP00000270776 | ENSP00000341243 |
| ENSP00000270776 | ENSP00000361990 |
| ENSP00000270776 | ENSP00000362463 |
| ENSP00000270776 | ENSP00000368438 |
| ENSP00000270776 | ENSP00000396068 |
| ENSP00000270776 | ENSP00000397009 |
| ENSP00000270776 | ENSP00000410833 |
| ENSP00000270800 | ENSP00000329384 |

|                 |                 |
|-----------------|-----------------|
| ENSP00000270861 | ENSP00000271555 |
| ENSP00000270861 | ENSP00000285873 |
| ENSP00000270861 | ENSP00000288976 |
| ENSP00000270861 | ENSP00000290158 |
| ENSP00000270861 | ENSP00000295951 |
| ENSP00000270861 | ENSP00000296509 |
| ENSP00000270861 | ENSP00000296733 |
| ENSP00000270861 | ENSP00000297338 |
| ENSP00000270861 | ENSP00000298139 |
| ENSP00000270861 | ENSP00000300584 |
| ENSP00000270861 | ENSP00000307272 |
| ENSP00000270861 | ENSP00000307853 |
| ENSP00000270861 | ENSP00000308699 |
| ENSP00000270861 | ENSP00000310649 |
| ENSP00000270861 | ENSP00000313034 |
| ENSP00000270861 | ENSP00000322608 |
| ENSP00000270861 | ENSP00000323663 |
| ENSP00000270861 | ENSP00000335357 |
| ENSP00000270861 | ENSP00000336868 |
| ENSP00000270861 | ENSP00000341551 |
| ENSP00000270861 | ENSP00000341848 |
| ENSP00000270861 | ENSP00000342510 |
| ENSP00000270861 | ENSP00000346566 |
| ENSP00000270861 | ENSP00000347232 |
| ENSP00000270861 | ENSP00000348554 |
| ENSP00000270861 | ENSP00000348573 |
| ENSP00000270861 | ENSP00000351284 |
| ENSP00000270861 | ENSP00000352572 |
| ENSP00000270861 | ENSP00000354720 |
| ENSP00000270861 | ENSP00000354916 |
| ENSP00000270861 | ENSP00000354927 |
| ENSP00000270861 | ENSP00000355922 |
| ENSP00000270861 | ENSP00000359206 |
| ENSP00000270861 | ENSP00000360076 |
| ENSP00000270861 | ENSP00000362578 |
| ENSP00000270861 | ENSP00000367638 |
| ENSP00000270861 | ENSP00000368017 |
| ENSP00000270861 | ENSP00000368349 |
| ENSP00000270861 | ENSP00000369716 |
| ENSP00000270861 | ENSP00000371308 |
| ENSP00000270861 | ENSP00000371451 |
| ENSP00000270861 | ENSP00000372689 |
| ENSP00000270861 | ENSP00000377655 |
| ENSP00000270861 | ENSP00000378350 |
| ENSP00000270861 | ENSP00000378529 |
| ENSP00000270861 | ENSP00000381932 |

|                 |                 |
|-----------------|-----------------|
| ENSP00000270861 | ENSP00000382271 |
| ENSP00000270861 | ENSP00000383145 |
| ENSP00000270861 | ENSP00000402527 |
| ENSP00000271002 | ENSP00000276201 |
| ENSP00000271002 | ENSP00000315397 |
| ENSP00000271002 | ENSP00000333633 |
| ENSP00000271002 | ENSP00000348128 |
| ENSP00000271002 | ENSP00000364737 |
| ENSP00000271002 | ENSP00000369862 |
| ENSP00000271373 | ENSP00000298910 |
| ENSP00000271373 | ENSP00000308610 |
| ENSP00000271373 | ENSP00000337396 |
| ENSP00000271373 | ENSP00000341213 |
| ENSP00000271373 | ENSP00000364649 |
| ENSP00000271373 | ENSP00000373600 |
| ENSP00000271373 | ENSP00000387262 |
| ENSP00000271375 | ENSP00000294179 |
| ENSP00000271375 | ENSP00000305459 |
| ENSP00000271375 | ENSP00000308496 |
| ENSP00000271375 | ENSP00000327716 |
| ENSP00000271375 | ENSP00000360183 |
| ENSP00000271375 | ENSP00000397441 |
| ENSP00000271375 | ENSP00000402240 |
| ENSP00000271385 | ENSP00000364320 |
| ENSP00000271452 | ENSP00000278412 |
| ENSP00000271452 | ENSP00000281513 |
| ENSP00000271452 | ENSP00000282074 |
| ENSP00000271452 | ENSP00000283006 |
| ENSP00000271452 | ENSP00000296509 |
| ENSP00000271452 | ENSP00000296702 |
| ENSP00000271452 | ENSP00000298048 |
| ENSP00000271452 | ENSP00000301332 |
| ENSP00000271452 | ENSP00000302530 |
| ENSP00000271452 | ENSP00000302640 |
| ENSP00000271452 | ENSP00000305941 |
| ENSP00000271452 | ENSP00000323439 |
| ENSP00000271452 | ENSP00000325677 |
| ENSP00000271452 | ENSP00000326514 |
| ENSP00000271452 | ENSP00000331831 |
| ENSP00000271452 | ENSP00000336856 |
| ENSP00000271452 | ENSP00000336868 |
| ENSP00000271452 | ENSP00000341382 |
| ENSP00000271452 | ENSP00000341680 |
| ENSP00000271452 | ENSP00000341848 |
| ENSP00000271452 | ENSP00000344352 |
| ENSP00000271452 | ENSP00000348573 |



|                 |                 |
|-----------------|-----------------|
| ENSP00000271452 | ENSP00000352572 |
| ENSP00000271452 | ENSP00000353735 |
| ENSP00000271452 | ENSP00000354486 |
| ENSP00000271452 | ENSP00000354720 |
| ENSP00000271452 | ENSP00000354957 |
| ENSP00000271452 | ENSP00000355922 |
| ENSP00000271452 | ENSP00000360532 |
| ENSP00000271452 | ENSP00000363055 |
| ENSP00000271452 | ENSP00000368801 |
| ENSP00000271452 | ENSP00000368976 |
| ENSP00000271452 | ENSP00000369075 |
| ENSP00000271452 | ENSP00000370408 |
| ENSP00000271452 | ENSP00000370557 |
| ENSP00000271452 | ENSP00000374566 |
| ENSP00000271452 | ENSP00000377446 |
| ENSP00000271452 | ENSP00000420588 |
| ENSP00000271526 | ENSP00000360532 |
| ENSP00000271526 | ENSP00000361162 |
| ENSP00000271526 | ENSP00000366829 |
| ENSP00000271526 | ENSP00000414634 |
| ENSP00000271555 | ENSP00000274289 |
| ENSP00000271555 | ENSP00000287598 |
| ENSP00000271555 | ENSP00000288976 |
| ENSP00000271555 | ENSP00000290158 |
| ENSP00000271555 | ENSP00000294168 |
| ENSP00000271555 | ENSP00000299424 |
| ENSP00000271555 | ENSP00000302530 |
| ENSP00000271555 | ENSP00000311005 |
| ENSP00000271555 | ENSP00000319169 |
| ENSP00000271555 | ENSP00000325690 |
| ENSP00000271555 | ENSP00000328720 |
| ENSP00000271555 | ENSP00000329357 |
| ENSP00000271555 | ENSP00000331057 |
| ENSP00000271555 | ENSP00000335357 |
| ENSP00000271555 | ENSP00000337088 |
| ENSP00000271555 | ENSP00000338345 |
| ENSP00000271555 | ENSP00000340896 |
| ENSP00000271555 | ENSP00000344537 |
| ENSP00000271555 | ENSP00000349049 |
| ENSP00000271555 | ENSP00000349213 |
| ENSP00000271555 | ENSP00000350512 |
| ENSP00000271555 | ENSP00000354916 |
| ENSP00000271555 | ENSP00000359818 |
| ENSP00000271555 | ENSP00000361998 |
| ENSP00000271555 | ENSP00000362717 |
| ENSP00000271555 | ENSP00000365439 |

|                 |                 |
|-----------------|-----------------|
| ENSP00000271555 | ENSP00000366534 |
| ENSP00000271555 | ENSP00000373715 |
| ENSP00000271588 | ENSP00000308610 |
| ENSP00000271628 | ENSP00000273480 |
| ENSP00000271628 | ENSP00000284776 |
| ENSP00000271628 | ENSP00000296702 |
| ENSP00000271628 | ENSP00000301740 |
| ENSP00000271628 | ENSP00000303191 |
| ENSP00000271628 | ENSP00000304350 |
| ENSP00000271628 | ENSP00000304370 |
| ENSP00000271628 | ENSP00000304903 |
| ENSP00000271628 | ENSP00000305790 |
| ENSP00000271628 | ENSP00000309166 |
| ENSP00000271628 | ENSP00000310448 |
| ENSP00000271628 | ENSP00000313674 |
| ENSP00000271628 | ENSP00000318861 |
| ENSP00000271628 | ENSP00000319169 |
| ENSP00000271628 | ENSP00000326261 |
| ENSP00000271628 | ENSP00000326806 |
| ENSP00000271628 | ENSP00000332103 |
| ENSP00000271628 | ENSP00000334148 |
| ENSP00000271628 | ENSP00000335321 |
| ENSP00000271628 | ENSP00000339090 |
| ENSP00000271628 | ENSP00000349594 |
| ENSP00000271628 | ENSP00000352308 |
| ENSP00000271628 | ENSP00000355136 |
| ENSP00000271628 | ENSP00000355261 |
| ENSP00000271628 | ENSP00000356263 |
| ENSP00000271628 | ENSP00000358554 |
| ENSP00000271628 | ENSP00000358605 |
| ENSP00000271628 | ENSP00000360532 |
| ENSP00000271628 | ENSP00000361577 |
| ENSP00000271628 | ENSP00000362110 |
| ENSP00000271628 | ENSP00000364482 |
| ENSP00000271628 | ENSP00000366607 |
| ENSP00000271628 | ENSP00000366829 |
| ENSP00000271628 | ENSP00000368801 |
| ENSP00000271628 | ENSP00000370719 |
| ENSP00000271628 | ENSP00000375863 |
| ENSP00000271628 | ENSP00000379607 |
| ENSP00000271628 | ENSP00000381031 |
| ENSP00000271628 | ENSP00000391798 |
| ENSP00000271628 | ENSP00000404121 |
| ENSP00000271628 | ENSP00000412566 |
| ENSP00000271628 | ENSP00000419235 |
| ENSP00000271643 | ENSP00000273075 |

|                 |                 |
|-----------------|-----------------|
| ENSP00000271643 | ENSP00000280527 |
| ENSP00000271643 | ENSP00000309052 |
| ENSP00000271643 | ENSP00000330836 |
| ENSP00000271643 | ENSP00000333537 |
| ENSP00000271643 | ENSP00000348307 |
| ENSP00000271643 | ENSP00000356991 |
| ENSP00000271715 | ENSP00000295951 |
| ENSP00000271715 | ENSP00000298317 |
| ENSP00000271715 | ENSP00000322915 |
| ENSP00000271715 | ENSP00000323288 |
| ENSP00000271715 | ENSP00000324020 |
| ENSP00000271715 | ENSP00000329357 |
| ENSP00000271715 | ENSP00000329466 |
| ENSP00000271715 | ENSP00000336587 |
| ENSP00000271715 | ENSP00000341848 |
| ENSP00000271715 | ENSP00000350094 |
| ENSP00000271715 | ENSP00000354158 |
| ENSP00000271715 | ENSP00000354486 |
| ENSP00000271715 | ENSP00000355922 |
| ENSP00000271715 | ENSP00000360916 |
| ENSP00000271715 | ENSP00000373331 |
| ENSP00000271715 | ENSP00000378295 |
| ENSP00000271715 | ENSP00000396620 |
| ENSP00000271764 | ENSP00000274242 |
| ENSP00000271764 | ENSP00000278572 |
| ENSP00000271764 | ENSP00000280557 |
| ENSP00000271764 | ENSP00000283875 |
| ENSP00000271764 | ENSP00000296802 |
| ENSP00000271764 | ENSP00000301364 |
| ENSP00000271764 | ENSP00000347087 |
| ENSP00000271764 | ENSP00000360532 |
| ENSP00000271764 | ENSP00000362744 |
| ENSP00000271764 | ENSP00000367615 |
| ENSP00000271843 | ENSP00000284811 |
| ENSP00000271843 | ENSP00000350708 |
| ENSP00000271843 | ENSP00000367787 |
| ENSP00000271843 | ENSP00000374359 |
| ENSP00000271883 | ENSP00000353622 |
| ENSP00000272065 | ENSP00000272227 |
| ENSP00000272065 | ENSP00000344456 |
| ENSP00000272065 | ENSP00000349823 |
| ENSP00000272065 | ENSP00000358307 |
| ENSP00000272065 | ENSP00000361824 |
| ENSP00000272065 | ENSP00000363559 |
| ENSP00000272065 | ENSP00000363763 |
| ENSP00000272065 | ENSP00000377486 |

|                 |                 |
|-----------------|-----------------|
| ENSP00000272065 | ENSP00000379607 |
| ENSP00000272065 | ENSP00000399511 |
| ENSP00000272091 | ENSP00000294008 |
| ENSP00000272091 | ENSP00000302562 |
| ENSP00000272091 | ENSP00000304370 |
| ENSP00000272091 | ENSP00000308546 |
| ENSP00000272091 | ENSP00000334148 |
| ENSP00000272117 | ENSP00000293362 |
| ENSP00000272134 | ENSP00000296145 |
| ENSP00000272134 | ENSP00000297261 |
| ENSP00000272139 | ENSP00000276603 |
| ENSP00000272139 | ENSP00000304370 |
| ENSP00000272139 | ENSP00000315859 |
| ENSP00000272139 | ENSP00000334148 |
| ENSP00000272139 | ENSP00000379607 |
| ENSP00000272163 | ENSP00000277010 |
| ENSP00000272163 | ENSP00000285949 |
| ENSP00000272163 | ENSP00000310721 |
| ENSP00000272163 | ENSP00000320604 |
| ENSP00000272163 | ENSP00000322957 |
| ENSP00000272163 | ENSP00000324729 |
| ENSP00000272163 | ENSP00000325425 |
| ENSP00000272163 | ENSP00000330812 |
| ENSP00000272163 | ENSP00000333946 |
| ENSP00000272163 | ENSP00000341662 |
| ENSP00000272163 | ENSP00000348762 |
| ENSP00000272163 | ENSP00000355517 |
| ENSP00000272163 | ENSP00000358413 |
| ENSP00000272163 | ENSP00000360918 |
| ENSP00000272163 | ENSP00000379430 |
| ENSP00000272163 | ENSP00000395535 |
| ENSP00000272167 | ENSP00000299824 |
| ENSP00000272167 | ENSP00000348762 |
| ENSP00000272167 | ENSP00000349145 |
| ENSP00000272203 | ENSP00000286835 |
| ENSP00000272203 | ENSP00000315859 |
| ENSP00000272203 | ENSP00000325863 |
| ENSP00000272203 | ENSP00000341382 |
| ENSP00000272203 | ENSP00000348215 |
| ENSP00000272203 | ENSP00000352257 |
| ENSP00000272203 | ENSP00000356146 |
| ENSP00000272203 | ENSP00000358902 |
| ENSP00000272203 | ENSP00000380450 |
| ENSP00000272227 | ENSP00000278572 |
| ENSP00000272227 | ENSP00000280700 |
| ENSP00000272227 | ENSP00000282050 |

|                 |                 |
|-----------------|-----------------|
| ENSP00000272227 | ENSP00000286091 |
| ENSP00000272227 | ENSP00000286428 |
| ENSP00000272227 | ENSP00000292180 |
| ENSP00000272227 | ENSP00000296577 |
| ENSP00000272227 | ENSP00000299767 |
| ENSP00000272227 | ENSP00000310129 |
| ENSP00000272227 | ENSP00000312735 |
| ENSP00000272227 | ENSP00000318147 |
| ENSP00000272227 | ENSP00000321259 |
| ENSP00000272227 | ENSP00000326699 |
| ENSP00000272227 | ENSP00000330836 |
| ENSP00000272227 | ENSP00000331369 |
| ENSP00000272227 | ENSP00000341243 |
| ENSP00000272227 | ENSP00000347948 |
| ENSP00000272227 | ENSP00000357880 |
| ENSP00000272227 | ENSP00000360286 |
| ENSP00000272227 | ENSP00000368646 |
| ENSP00000272227 | ENSP00000379607 |
| ENSP00000272238 | ENSP00000304500 |
| ENSP00000272238 | ENSP00000314615 |
| ENSP00000272238 | ENSP00000316845 |
| ENSP00000272238 | ENSP00000332247 |
| ENSP00000272238 | ENSP00000333255 |
| ENSP00000272238 | ENSP00000333873 |
| ENSP00000272238 | ENSP00000343313 |
| ENSP00000272238 | ENSP00000352522 |
| ENSP00000272238 | ENSP00000363162 |
| ENSP00000272252 | ENSP00000280871 |
| ENSP00000272252 | ENSP00000294543 |
| ENSP00000272252 | ENSP00000315791 |
| ENSP00000272252 | ENSP00000319104 |
| ENSP00000272252 | ENSP00000321259 |
| ENSP00000272252 | ENSP00000348010 |
| ENSP00000272252 | ENSP00000351284 |
| ENSP00000272252 | ENSP00000362900 |
| ENSP00000272252 | ENSP00000364289 |
| ENSP00000272252 | ENSP00000368119 |
| ENSP00000272252 | ENSP00000379500 |
| ENSP00000272286 | ENSP00000278572 |
| ENSP00000272286 | ENSP00000315791 |
| ENSP00000272286 | ENSP00000336762 |
| ENSP00000272286 | ENSP00000355968 |
| ENSP00000272286 | ENSP00000359321 |
| ENSP00000272286 | ENSP00000362900 |
| ENSP00000272286 | ENSP00000364895 |
| ENSP00000272286 | ENSP00000376204 |

|                 |                 |
|-----------------|-----------------|
| ENSP00000272286 | ENSP00000379003 |
| ENSP00000272286 | ENSP00000417085 |
| ENSP00000272322 | ENSP00000272427 |
| ENSP00000272322 | ENSP00000273398 |
| ENSP00000272322 | ENSP00000286448 |
| ENSP00000272322 | ENSP00000305255 |
| ENSP00000272322 | ENSP00000308496 |
| ENSP00000272322 | ENSP00000326869 |
| ENSP00000272322 | ENSP00000331268 |
| ENSP00000272322 | ENSP00000341662 |
| ENSP00000272322 | ENSP00000343741 |
| ENSP00000272322 | ENSP00000353564 |
| ENSP00000272322 | ENSP00000354558 |
| ENSP00000272322 | ENSP00000360183 |
| ENSP00000272322 | ENSP00000369099 |
| ENSP00000272322 | ENSP00000369736 |
| ENSP00000272322 | ENSP00000372697 |
| ENSP00000272322 | ENSP00000376268 |
| ENSP00000272322 | ENSP00000389934 |
| ENSP00000272322 | ENSP00000390831 |
| ENSP00000272322 | ENSP00000391197 |
| ENSP00000272322 | ENSP00000401435 |
| ENSP00000272322 | ENSP00000404016 |
| ENSP00000272322 | ENSP00000406988 |
| ENSP00000272322 | ENSP00000409952 |
| ENSP00000272418 | ENSP00000274606 |
| ENSP00000272418 | ENSP00000274849 |
| ENSP00000272418 | ENSP00000278572 |
| ENSP00000272418 | ENSP00000280557 |
| ENSP00000272418 | ENSP00000295491 |
| ENSP00000272418 | ENSP00000296674 |
| ENSP00000272418 | ENSP00000296802 |
| ENSP00000272418 | ENSP00000296805 |
| ENSP00000272418 | ENSP00000297908 |
| ENSP00000272418 | ENSP00000297990 |
| ENSP00000272418 | ENSP00000301585 |
| ENSP00000272418 | ENSP00000301962 |
| ENSP00000272418 | ENSP00000302896 |
| ENSP00000272418 | ENSP00000305653 |
| ENSP00000272418 | ENSP00000308897 |
| ENSP00000272418 | ENSP00000310590 |
| ENSP00000272418 | ENSP00000311028 |
| ENSP00000272418 | ENSP00000311135 |
| ENSP00000272418 | ENSP00000312735 |
| ENSP00000272418 | ENSP00000314949 |
| ENSP00000272418 | ENSP00000317376 |

|                 |                 |
|-----------------|-----------------|
| ENSP00000272418 | ENSP00000318646 |
| ENSP00000272418 | ENSP00000321636 |
| ENSP00000272418 | ENSP00000323856 |
| ENSP00000272418 | ENSP00000324122 |
| ENSP00000272418 | ENSP00000326981 |
| ENSP00000272418 | ENSP00000331019 |
| ENSP00000272418 | ENSP00000336702 |
| ENSP00000272418 | ENSP00000337127 |
| ENSP00000272418 | ENSP00000337839 |
| ENSP00000272418 | ENSP00000339095 |
| ENSP00000272418 | ENSP00000341692 |
| ENSP00000272418 | ENSP00000343081 |
| ENSP00000272418 | ENSP00000345156 |
| ENSP00000272418 | ENSP00000346015 |
| ENSP00000272418 | ENSP00000346027 |
| ENSP00000272418 | ENSP00000346050 |
| ENSP00000272418 | ENSP00000346067 |
| ENSP00000272418 | ENSP00000346120 |
| ENSP00000272418 | ENSP00000346725 |
| ENSP00000272418 | ENSP00000348722 |
| ENSP00000272418 | ENSP00000350491 |
| ENSP00000272418 | ENSP00000352706 |
| ENSP00000272418 | ENSP00000354739 |
| ENSP00000272418 | ENSP00000355471 |
| ENSP00000272418 | ENSP00000356134 |
| ENSP00000272418 | ENSP00000358140 |
| ENSP00000272418 | ENSP00000358812 |
| ENSP00000272418 | ENSP00000361076 |
| ENSP00000272418 | ENSP00000361206 |
| ENSP00000272418 | ENSP00000361699 |
| ENSP00000272418 | ENSP00000362036 |
| ENSP00000272418 | ENSP00000362135 |
| ENSP00000272418 | ENSP00000362208 |
| ENSP00000272418 | ENSP00000362744 |
| ENSP00000272418 | ENSP00000363018 |
| ENSP00000272418 | ENSP00000363676 |
| ENSP00000272418 | ENSP00000364320 |
| ENSP00000272418 | ENSP00000364883 |
| ENSP00000272418 | ENSP00000368790 |
| ENSP00000272418 | ENSP00000369757 |
| ENSP00000272418 | ENSP00000370589 |
| ENSP00000272418 | ENSP00000372445 |
| ENSP00000272418 | ENSP00000373404 |
| ENSP00000272418 | ENSP00000379339 |
| ENSP00000272418 | ENSP00000379888 |
| ENSP00000272418 | ENSP00000382250 |

|                 |                 |
|-----------------|-----------------|
| ENSP00000272418 | ENSP00000393241 |
| ENSP00000272418 | ENSP00000396704 |
| ENSP00000272418 | ENSP00000403175 |
| ENSP00000272418 | ENSP00000412583 |
| ENSP00000272418 | ENSP00000414321 |
| ENSP00000272418 | ENSP00000416110 |
| ENSP00000272418 | ENSP00000420714 |
| ENSP00000272424 | ENSP00000330836 |
| ENSP00000272424 | ENSP00000349658 |
| ENSP00000272424 | ENSP00000351284 |
| ENSP00000272424 | ENSP00000352257 |
| ENSP00000272424 | ENSP00000361186 |
| ENSP00000272427 | ENSP00000272972 |
| ENSP00000272427 | ENSP00000273666 |
| ENSP00000272427 | ENSP00000316845 |
| ENSP00000272427 | ENSP00000317714 |
| ENSP00000272427 | ENSP00000323377 |
| ENSP00000272427 | ENSP00000326514 |
| ENSP00000272427 | ENSP00000332326 |
| ENSP00000272427 | ENSP00000334100 |
| ENSP00000272427 | ENSP00000341538 |
| ENSP00000272427 | ENSP00000348215 |
| ENSP00000272427 | ENSP00000353564 |
| ENSP00000272427 | ENSP00000355721 |
| ENSP00000272427 | ENSP00000356231 |
| ENSP00000272427 | ENSP00000362399 |
| ENSP00000272427 | ENSP00000365630 |
| ENSP00000272427 | ENSP00000368565 |
| ENSP00000272427 | ENSP00000369409 |
| ENSP00000272427 | ENSP00000373399 |
| ENSP00000272427 | ENSP00000380450 |
| ENSP00000272427 | ENSP00000389934 |
| ENSP00000272438 | ENSP00000327309 |
| ENSP00000272438 | ENSP00000375881 |
| ENSP00000272444 | ENSP00000289371 |
| ENSP00000272444 | ENSP00000293406 |
| ENSP00000272444 | ENSP00000296328 |
| ENSP00000272444 | ENSP00000301788 |
| ENSP00000272444 | ENSP00000307567 |
| ENSP00000272444 | ENSP00000314949 |
| ENSP00000272444 | ENSP00000332444 |
| ENSP00000272444 | ENSP00000342793 |
| ENSP00000272444 | ENSP00000355013 |
| ENSP00000272444 | ENSP00000358140 |
| ENSP00000272444 | ENSP00000362166 |
| ENSP00000272444 | ENSP00000370258 |



|                 |                 |
|-----------------|-----------------|
| ENSP00000272444 | ENSP00000388872 |
| ENSP00000272444 | ENSP00000396704 |
| ENSP00000272520 | ENSP00000278407 |
| ENSP00000272521 | ENSP00000275820 |
| ENSP00000272521 | ENSP00000280350 |
| ENSP00000272521 | ENSP00000291576 |
| ENSP00000272521 | ENSP00000296792 |
| ENSP00000272521 | ENSP00000297579 |
| ENSP00000272521 | ENSP00000297990 |
| ENSP00000272521 | ENSP00000298292 |
| ENSP00000272521 | ENSP00000308179 |
| ENSP00000272521 | ENSP00000311135 |
| ENSP00000272521 | ENSP00000314193 |
| ENSP00000272521 | ENSP00000315674 |
| ENSP00000272521 | ENSP00000321449 |
| ENSP00000272521 | ENSP00000323302 |
| ENSP00000272521 | ENSP00000326981 |
| ENSP00000272521 | ENSP00000327179 |
| ENSP00000272521 | ENSP00000328854 |
| ENSP00000272521 | ENSP00000355471 |
| ENSP00000272521 | ENSP00000355541 |
| ENSP00000272521 | ENSP00000358812 |
| ENSP00000272521 | ENSP00000363313 |
| ENSP00000272521 | ENSP00000363642 |
| ENSP00000272521 | ENSP00000363746 |
| ENSP00000272521 | ENSP00000370589 |
| ENSP00000272521 | ENSP00000371169 |
| ENSP00000272521 | ENSP00000372695 |
| ENSP00000272521 | ENSP00000399454 |
| ENSP00000272521 | ENSP00000402869 |
| ENSP00000272521 | ENSP00000405614 |
| ENSP00000272542 | ENSP00000273130 |
| ENSP00000272542 | ENSP00000297282 |
| ENSP00000272542 | ENSP00000344055 |
| ENSP00000272542 | ENSP00000356811 |
| ENSP00000272542 | ENSP00000361264 |
| ENSP00000272602 | ENSP00000331727 |
| ENSP00000272638 | ENSP00000290649 |
| ENSP00000272638 | ENSP00000299767 |
| ENSP00000272638 | ENSP00000337053 |
| ENSP00000272638 | ENSP00000343001 |
| ENSP00000272638 | ENSP00000380460 |
| ENSP00000272645 | ENSP00000273783 |
| ENSP00000272645 | ENSP00000278412 |
| ENSP00000272645 | ENSP00000282326 |
| ENSP00000272645 | ENSP00000286835 |

|                 |                 |
|-----------------|-----------------|
| ENSP00000272645 | ENSP00000288199 |
| ENSP00000272645 | ENSP00000292363 |
| ENSP00000272645 | ENSP00000293860 |
| ENSP00000272645 | ENSP00000295131 |
| ENSP00000272645 | ENSP00000296802 |
| ENSP00000272645 | ENSP00000299543 |
| ENSP00000272645 | ENSP00000300146 |
| ENSP00000272645 | ENSP00000300413 |
| ENSP00000272645 | ENSP00000301788 |
| ENSP00000272645 | ENSP00000304321 |
| ENSP00000272645 | ENSP00000305503 |
| ENSP00000272645 | ENSP00000306906 |
| ENSP00000272645 | ENSP00000306983 |
| ENSP00000272645 | ENSP00000310260 |
| ENSP00000272645 | ENSP00000312735 |
| ENSP00000272645 | ENSP00000314311 |
| ENSP00000272645 | ENSP00000314949 |
| ENSP00000272645 | ENSP00000315950 |
| ENSP00000272645 | ENSP00000317177 |
| ENSP00000272645 | ENSP00000317636 |
| ENSP00000272645 | ENSP00000317872 |
| ENSP00000272645 | ENSP00000318641 |
| ENSP00000272645 | ENSP00000323046 |
| ENSP00000272645 | ENSP00000323720 |
| ENSP00000272645 | ENSP00000324124 |
| ENSP00000272645 | ENSP00000324792 |
| ENSP00000272645 | ENSP00000327889 |
| ENSP00000272645 | ENSP00000329029 |
| ENSP00000272645 | ENSP00000330343 |
| ENSP00000272645 | ENSP00000331111 |
| ENSP00000272645 | ENSP00000335261 |
| ENSP00000272645 | ENSP00000337340 |
| ENSP00000272645 | ENSP00000340823 |
| ENSP00000272645 | ENSP00000342121 |
| ENSP00000272645 | ENSP00000342374 |
| ENSP00000272645 | ENSP00000342793 |
| ENSP00000272645 | ENSP00000342889 |
| ENSP00000272645 | ENSP00000343129 |
| ENSP00000272645 | ENSP00000350967 |
| ENSP00000272645 | ENSP00000354775 |
| ENSP00000272645 | ENSP00000355013 |
| ENSP00000272645 | ENSP00000356146 |
| ENSP00000272645 | ENSP00000356989 |
| ENSP00000272645 | ENSP00000358140 |
| ENSP00000272645 | ENSP00000359518 |
| ENSP00000272645 | ENSP00000359531 |

|                 |                 |
|-----------------|-----------------|
| ENSP00000272645 | ENSP00000360515 |
| ENSP00000272645 | ENSP00000361433 |
| ENSP00000272645 | ENSP00000362900 |
| ENSP00000272645 | ENSP00000363021 |
| ENSP00000272645 | ENSP00000363779 |
| ENSP00000272645 | ENSP00000364813 |
| ENSP00000272645 | ENSP00000366828 |
| ENSP00000272645 | ENSP00000368438 |
| ENSP00000272645 | ENSP00000369695 |
| ENSP00000272645 | ENSP00000370258 |
| ENSP00000272645 | ENSP00000371800 |
| ENSP00000272645 | ENSP00000372883 |
| ENSP00000272645 | ENSP00000377969 |
| ENSP00000272645 | ENSP00000381064 |
| ENSP00000272645 | ENSP00000383503 |
| ENSP00000272645 | ENSP00000386759 |
| ENSP00000272645 | ENSP00000397259 |
| ENSP00000272645 | ENSP00000397636 |
| ENSP00000272645 | ENSP00000403345 |
| ENSP00000272645 | ENSP00000403852 |
| ENSP00000272645 | ENSP00000405636 |
| ENSP00000272645 | ENSP00000406280 |
| ENSP00000272645 | ENSP00000406293 |
| ENSP00000272645 | ENSP00000410530 |
| ENSP00000272645 | ENSP00000410758 |
| ENSP00000272645 | ENSP00000410954 |
| ENSP00000272645 | ENSP00000412566 |
| ENSP00000272645 | ENSP00000414006 |
| ENSP00000272645 | ENSP00000414110 |
| ENSP00000272645 | ENSP00000414634 |
| ENSP00000272645 | ENSP00000416599 |
| ENSP00000272748 | ENSP00000368959 |
| ENSP00000272902 | ENSP00000296490 |
| ENSP00000272902 | ENSP00000301329 |
| ENSP00000272902 | ENSP00000304185 |
| ENSP00000272902 | ENSP00000307004 |
| ENSP00000272902 | ENSP00000311768 |
| ENSP00000272902 | ENSP00000333298 |
| ENSP00000272902 | ENSP00000349022 |
| ENSP00000272902 | ENSP00000353904 |
| ENSP00000272902 | ENSP00000358854 |
| ENSP00000272902 | ENSP00000360286 |
| ENSP00000272902 | ENSP00000365147 |
| ENSP00000272902 | ENSP00000373509 |
| ENSP00000272937 | ENSP00000302216 |
| ENSP00000272937 | ENSP00000351407 |

|                 |                 |
|-----------------|-----------------|
| ENSP00000272937 | ENSP00000365735 |
| ENSP00000272972 | ENSP00000286428 |
| ENSP00000272972 | ENSP00000290846 |
| ENSP00000272972 | ENSP00000307684 |
| ENSP00000272972 | ENSP00000345988 |
| ENSP00000272972 | ENSP00000356989 |
| ENSP00000272972 | ENSP00000357748 |
| ENSP00000272972 | ENSP00000360473 |
| ENSP00000272972 | ENSP00000378306 |
| ENSP00000272972 | ENSP00000389934 |
| ENSP00000273037 | ENSP00000317177 |
| ENSP00000273037 | ENSP00000342793 |
| ENSP00000273064 | ENSP00000273067 |
| ENSP00000273064 | ENSP00000274140 |
| ENSP00000273064 | ENSP00000283646 |
| ENSP00000273064 | ENSP00000285896 |
| ENSP00000273064 | ENSP00000295926 |
| ENSP00000273064 | ENSP00000296509 |
| ENSP00000273064 | ENSP00000296786 |
| ENSP00000273064 | ENSP00000307900 |
| ENSP00000273064 | ENSP00000308546 |
| ENSP00000273064 | ENSP00000309141 |
| ENSP00000273064 | ENSP00000311496 |
| ENSP00000273064 | ENSP00000314491 |
| ENSP00000273064 | ENSP00000315693 |
| ENSP00000273064 | ENSP00000317087 |
| ENSP00000273064 | ENSP00000320924 |
| ENSP00000273064 | ENSP00000320949 |
| ENSP00000273064 | ENSP00000352802 |
| ENSP00000273064 | ENSP00000354673 |
| ENSP00000273064 | ENSP00000356448 |
| ENSP00000273064 | ENSP00000359691 |
| ENSP00000273064 | ENSP00000361287 |
| ENSP00000273064 | ENSP00000368438 |
| ENSP00000273064 | ENSP00000369965 |
| ENSP00000273064 | ENSP00000373474 |
| ENSP00000273064 | ENSP00000374529 |
| ENSP00000273064 | ENSP00000379217 |
| ENSP00000273064 | ENSP00000386878 |
| ENSP00000273064 | ENSP00000402240 |
| ENSP00000273064 | ENSP00000403817 |
| ENSP00000273064 | ENSP00000412922 |
| ENSP00000273067 | ENSP00000290649 |
| ENSP00000273067 | ENSP00000295066 |
| ENSP00000273067 | ENSP00000304051 |
| ENSP00000273067 | ENSP00000315791 |

|                 |                 |
|-----------------|-----------------|
| ENSP00000273067 | ENSP00000331487 |
| ENSP00000273067 | ENSP00000357998 |
| ENSP00000273067 | ENSP00000366395 |
| ENSP00000273067 | ENSP00000379457 |
| ENSP00000273067 | ENSP00000383719 |
| ENSP00000273075 | ENSP00000286091 |
| ENSP00000273075 | ENSP00000287936 |
| ENSP00000273075 | ENSP00000308275 |
| ENSP00000273075 | ENSP00000333950 |
| ENSP00000273075 | ENSP00000340836 |
| ENSP00000273075 | ENSP00000342056 |
| ENSP00000273075 | ENSP00000342300 |
| ENSP00000273075 | ENSP00000349785 |
| ENSP00000273075 | ENSP00000353655 |
| ENSP00000273075 | ENSP00000355627 |
| ENSP00000273075 | ENSP00000366863 |
| ENSP00000273075 | ENSP00000391723 |
| ENSP00000273075 | ENSP00000394869 |
| ENSP00000273077 | ENSP00000299601 |
| ENSP00000273130 | ENSP00000296509 |
| ENSP00000273130 | ENSP00000314837 |
| ENSP00000273130 | ENSP00000348965 |
| ENSP00000273130 | ENSP00000352572 |
| ENSP00000273130 | ENSP00000360252 |
| ENSP00000273130 | ENSP00000360532 |
| ENSP00000273130 | ENSP00000379607 |
| ENSP00000273258 | ENSP00000290299 |
| ENSP00000273258 | ENSP00000300688 |
| ENSP00000273308 | ENSP00000286091 |
| ENSP00000273308 | ENSP00000312834 |
| ENSP00000273308 | ENSP00000349298 |
| ENSP00000273308 | ENSP00000399511 |
| ENSP00000273317 | ENSP00000295959 |
| ENSP00000273317 | ENSP00000304226 |
| ENSP00000273317 | ENSP00000355601 |
| ENSP00000273390 | ENSP00000337736 |
| ENSP00000273390 | ENSP00000380702 |
| ENSP00000273398 | ENSP00000278671 |
| ENSP00000273398 | ENSP00000281708 |
| ENSP00000273398 | ENSP00000282841 |
| ENSP00000273398 | ENSP00000284719 |
| ENSP00000273398 | ENSP00000284727 |
| ENSP00000273398 | ENSP00000285896 |
| ENSP00000273398 | ENSP00000286448 |
| ENSP00000273398 | ENSP00000289359 |
| ENSP00000273398 | ENSP00000290330 |

|                 |                 |
|-----------------|-----------------|
| ENSP00000273398 | ENSP00000290949 |
| ENSP00000273398 | ENSP00000290974 |
| ENSP00000273398 | ENSP00000294785 |
| ENSP00000273398 | ENSP00000301825 |
| ENSP00000273398 | ENSP00000304169 |
| ENSP00000273398 | ENSP00000304592 |
| ENSP00000273398 | ENSP00000305069 |
| ENSP00000273398 | ENSP00000305255 |
| ENSP00000273398 | ENSP00000309457 |
| ENSP00000273398 | ENSP00000310129 |
| ENSP00000273398 | ENSP00000313603 |
| ENSP00000273398 | ENSP00000313953 |
| ENSP00000273398 | ENSP00000314508 |
| ENSP00000273398 | ENSP00000317334 |
| ENSP00000273398 | ENSP00000318944 |
| ENSP00000273398 | ENSP00000320924 |
| ENSP00000273398 | ENSP00000326534 |
| ENSP00000273398 | ENSP00000327650 |
| ENSP00000273398 | ENSP00000330408 |
| ENSP00000273398 | ENSP00000333298 |
| ENSP00000273398 | ENSP00000333946 |
| ENSP00000273398 | ENSP00000337501 |
| ENSP00000273398 | ENSP00000337838 |
| ENSP00000273398 | ENSP00000340019 |
| ENSP00000273398 | ENSP00000343741 |
| ENSP00000273398 | ENSP00000344106 |
| ENSP00000273398 | ENSP00000345528 |
| ENSP00000273398 | ENSP00000346453 |
| ENSP00000273398 | ENSP00000348163 |
| ENSP00000273398 | ENSP00000349078 |
| ENSP00000273398 | ENSP00000350854 |
| ENSP00000273398 | ENSP00000351346 |
| ENSP00000273398 | ENSP00000351520 |
| ENSP00000273398 | ENSP00000352522 |
| ENSP00000273398 | ENSP00000352738 |
| ENSP00000273398 | ENSP00000352802 |
| ENSP00000273398 | ENSP00000353073 |
| ENSP00000273398 | ENSP00000353332 |
| ENSP00000273398 | ENSP00000354347 |
| ENSP00000273398 | ENSP00000356655 |
| ENSP00000273398 | ENSP00000357341 |
| ENSP00000273398 | ENSP00000358033 |
| ENSP00000273398 | ENSP00000359067 |
| ENSP00000273398 | ENSP00000360183 |
| ENSP00000273398 | ENSP00000360269 |
| ENSP00000273398 | ENSP00000360473 |

|                 |                 |
|-----------------|-----------------|
| ENSP00000273398 | ENSP00000361845 |
| ENSP00000273398 | ENSP00000362399 |
| ENSP00000273398 | ENSP00000363162 |
| ENSP00000273398 | ENSP00000365388 |
| ENSP00000273398 | ENSP00000365840 |
| ENSP00000273398 | ENSP00000367299 |
| ENSP00000273398 | ENSP00000367923 |
| ENSP00000273398 | ENSP00000368439 |
| ENSP00000273398 | ENSP00000369099 |
| ENSP00000273398 | ENSP00000369810 |
| ENSP00000273398 | ENSP00000372697 |
| ENSP00000273398 | ENSP00000373082 |
| ENSP00000273398 | ENSP00000375809 |
| ENSP00000273398 | ENSP00000376945 |
| ENSP00000273398 | ENSP00000376946 |
| ENSP00000273398 | ENSP00000378368 |
| ENSP00000273398 | ENSP00000386878 |
| ENSP00000273398 | ENSP00000386992 |
| ENSP00000273398 | ENSP00000389065 |
| ENSP00000273398 | ENSP00000389934 |
| ENSP00000273398 | ENSP00000390831 |
| ENSP00000273398 | ENSP00000391197 |
| ENSP00000273398 | ENSP00000391723 |
| ENSP00000273398 | ENSP00000397598 |
| ENSP00000273398 | ENSP00000402240 |
| ENSP00000273398 | ENSP00000403397 |
| ENSP00000273398 | ENSP00000404016 |
| ENSP00000273398 | ENSP00000406988 |
| ENSP00000273398 | ENSP00000407487 |
| ENSP00000273398 | ENSP00000409952 |
| ENSP00000273398 | ENSP00000411327 |
| ENSP00000273398 | ENSP00000412553 |
| ENSP00000273398 | ENSP00000413319 |
| ENSP00000273398 | ENSP00000413632 |
| ENSP00000273398 | ENSP00000414373 |
| ENSP00000273398 | ENSP00000417748 |
| ENSP00000273480 | ENSP00000276533 |
| ENSP00000273480 | ENSP00000277458 |
| ENSP00000273480 | ENSP00000292211 |
| ENSP00000273480 | ENSP00000295066 |
| ENSP00000273480 | ENSP00000297290 |
| ENSP00000273480 | ENSP00000302120 |
| ENSP00000273480 | ENSP00000304350 |
| ENSP00000273480 | ENSP00000305721 |
| ENSP00000273480 | ENSP00000307786 |
| ENSP00000273480 | ENSP00000313691 |

|                 |                 |
|-----------------|-----------------|
| ENSP00000273480 | ENSP00000313881 |
| ENSP00000273480 | ENSP00000314004 |
| ENSP00000273480 | ENSP00000318775 |
| ENSP00000273480 | ENSP00000321927 |
| ENSP00000273480 | ENSP00000322730 |
| ENSP00000273480 | ENSP00000334657 |
| ENSP00000273480 | ENSP00000339109 |
| ENSP00000273480 | ENSP00000359206 |
| ENSP00000273480 | ENSP00000362110 |
| ENSP00000273480 | ENSP00000365025 |
| ENSP00000273480 | ENSP00000389934 |
| ENSP00000273588 | ENSP00000275605 |
| ENSP00000273588 | ENSP00000319531 |
| ENSP00000273588 | ENSP00000333667 |
| ENSP00000273588 | ENSP00000358417 |
| ENSP00000273588 | ENSP00000365773 |
| ENSP00000273590 | ENSP00000341551 |
| ENSP00000273598 | ENSP00000352265 |
| ENSP00000273666 | ENSP00000334100 |
| ENSP00000273666 | ENSP00000343144 |
| ENSP00000273666 | ENSP00000347169 |
| ENSP00000273666 | ENSP00000349486 |
| ENSP00000273666 | ENSP00000361465 |
| ENSP00000273666 | ENSP00000386621 |
| ENSP00000273666 | ENSP00000389934 |
| ENSP00000273783 | ENSP00000295066 |
| ENSP00000273783 | ENSP00000304668 |
| ENSP00000273783 | ENSP00000310440 |
| ENSP00000273783 | ENSP00000312042 |
| ENSP00000273783 | ENSP00000312735 |
| ENSP00000273783 | ENSP00000319979 |
| ENSP00000273783 | ENSP00000325448 |
| ENSP00000273783 | ENSP00000327821 |
| ENSP00000273783 | ENSP00000330343 |
| ENSP00000273783 | ENSP00000330408 |
| ENSP00000273783 | ENSP00000353575 |
| ENSP00000273783 | ENSP00000361467 |
| ENSP00000273783 | ENSP00000362993 |
| ENSP00000273783 | ENSP00000364119 |
| ENSP00000273783 | ENSP00000373509 |
| ENSP00000273783 | ENSP00000382595 |
| ENSP00000273783 | ENSP00000394869 |
| ENSP00000273920 | ENSP00000286428 |
| ENSP00000273920 | ENSP00000296273 |
| ENSP00000273920 | ENSP00000342755 |
| ENSP00000273920 | ENSP00000353660 |



|                 |                 |
|-----------------|-----------------|
| ENSP00000273920 | ENSP00000369411 |
| ENSP00000273920 | ENSP00000370151 |
| ENSP00000273951 | ENSP00000367064 |
| ENSP00000273962 | ENSP00000314311 |
| ENSP00000273962 | ENSP00000314441 |
| ENSP00000273962 | ENSP00000327821 |
| ENSP00000273962 | ENSP00000328671 |
| ENSP00000273962 | ENSP00000333934 |
| ENSP00000273962 | ENSP00000346453 |
| ENSP00000273962 | ENSP00000356476 |
| ENSP00000273962 | ENSP00000356548 |
| ENSP00000273962 | ENSP00000364320 |
| ENSP00000273962 | ENSP00000365837 |
| ENSP00000273968 | ENSP00000367346 |
| ENSP00000273968 | ENSP00000369820 |
| ENSP00000273986 | ENSP00000329623 |
| ENSP00000273986 | ENSP00000361686 |
| ENSP00000273986 | ENSP00000370607 |
| ENSP00000273986 | ENSP00000392330 |
| ENSP00000274000 | ENSP00000377148 |
| ENSP00000274030 | ENSP00000309555 |
| ENSP00000274030 | ENSP00000311344 |
| ENSP00000274030 | ENSP00000327145 |
| ENSP00000274031 | ENSP00000299424 |
| ENSP00000274031 | ENSP00000309555 |
| ENSP00000274031 | ENSP00000344537 |
| ENSP00000274031 | ENSP00000350633 |
| ENSP00000274031 | ENSP00000352516 |
| ENSP00000274140 | ENSP00000287936 |
| ENSP00000274140 | ENSP00000288774 |
| ENSP00000274140 | ENSP00000290649 |
| ENSP00000274140 | ENSP00000295066 |
| ENSP00000274140 | ENSP00000303511 |
| ENSP00000274140 | ENSP00000304051 |
| ENSP00000274140 | ENSP00000315791 |
| ENSP00000274140 | ENSP00000320885 |
| ENSP00000274140 | ENSP00000331487 |
| ENSP00000274140 | ENSP00000333836 |
| ENSP00000274140 | ENSP00000348010 |
| ENSP00000274140 | ENSP00000357998 |
| ENSP00000274140 | ENSP00000366395 |
| ENSP00000274140 | ENSP00000379457 |
| ENSP00000274140 | ENSP00000383719 |
| ENSP00000274140 | ENSP00000387347 |
| ENSP00000274242 | ENSP00000274606 |
| ENSP00000274242 | ENSP00000283875 |

|                 |                 |
|-----------------|-----------------|
| ENSP00000274242 | ENSP00000287038 |
| ENSP00000274242 | ENSP00000294189 |
| ENSP00000274242 | ENSP00000298283 |
| ENSP00000274242 | ENSP00000300151 |
| ENSP00000274242 | ENSP00000306548 |
| ENSP00000274242 | ENSP00000307889 |
| ENSP00000274242 | ENSP00000308897 |
| ENSP00000274242 | ENSP00000309334 |
| ENSP00000274242 | ENSP00000309830 |
| ENSP00000274242 | ENSP00000311430 |
| ENSP00000274242 | ENSP00000317334 |
| ENSP00000274242 | ENSP00000322419 |
| ENSP00000274242 | ENSP00000327309 |
| ENSP00000274242 | ENSP00000330945 |
| ENSP00000274242 | ENSP00000339484 |
| ENSP00000274242 | ENSP00000339795 |
| ENSP00000274242 | ENSP00000345156 |
| ENSP00000274242 | ENSP00000346015 |
| ENSP00000274242 | ENSP00000346022 |
| ENSP00000274242 | ENSP00000346027 |
| ENSP00000274242 | ENSP00000346037 |
| ENSP00000274242 | ENSP00000346088 |
| ENSP00000274242 | ENSP00000346120 |
| ENSP00000274242 | ENSP00000347329 |
| ENSP00000274242 | ENSP00000347997 |
| ENSP00000274242 | ENSP00000350708 |
| ENSP00000274242 | ENSP00000353998 |
| ENSP00000274242 | ENSP00000354525 |
| ENSP00000274242 | ENSP00000354739 |
| ENSP00000274242 | ENSP00000359345 |
| ENSP00000274242 | ENSP00000361076 |
| ENSP00000274242 | ENSP00000363018 |
| ENSP00000274242 | ENSP00000363559 |
| ENSP00000274242 | ENSP00000363676 |
| ENSP00000274242 | ENSP00000364320 |
| ENSP00000274242 | ENSP00000366249 |
| ENSP00000274242 | ENSP00000368699 |
| ENSP00000274242 | ENSP00000373039 |
| ENSP00000274242 | ENSP00000373404 |
| ENSP00000274242 | ENSP00000374455 |
| ENSP00000274242 | ENSP00000375730 |
| ENSP00000274242 | ENSP00000376946 |
| ENSP00000274242 | ENSP00000377640 |
| ENSP00000274242 | ENSP00000377865 |
| ENSP00000274242 | ENSP00000378160 |
| ENSP00000274242 | ENSP00000380156 |

|                 |                 |
|-----------------|-----------------|
| ENSP00000274242 | ENSP00000381654 |
| ENSP00000274242 | ENSP00000386717 |
| ENSP00000274242 | ENSP00000389103 |
| ENSP00000274242 | ENSP00000393393 |
| ENSP00000274242 | ENSP00000396152 |
| ENSP00000274242 | ENSP00000402338 |
| ENSP00000274242 | ENSP00000410416 |
| ENSP00000274255 | ENSP00000278616 |
| ENSP00000274255 | ENSP00000284811 |
| ENSP00000274255 | ENSP00000294339 |
| ENSP00000274255 | ENSP00000301019 |
| ENSP00000274255 | ENSP00000301764 |
| ENSP00000274255 | ENSP00000304102 |
| ENSP00000274255 | ENSP00000308620 |
| ENSP00000274255 | ENSP00000311083 |
| ENSP00000274255 | ENSP00000311280 |
| ENSP00000274255 | ENSP00000320566 |
| ENSP00000274255 | ENSP00000325863 |
| ENSP00000274255 | ENSP00000329357 |
| ENSP00000274255 | ENSP00000334188 |
| ENSP00000274255 | ENSP00000335628 |
| ENSP00000274255 | ENSP00000337393 |
| ENSP00000274255 | ENSP00000339527 |
| ENSP00000274255 | ENSP00000341551 |
| ENSP00000274255 | ENSP00000343701 |
| ENSP00000274255 | ENSP00000350512 |
| ENSP00000274255 | ENSP00000360621 |
| ENSP00000274255 | ENSP00000362608 |
| ENSP00000274255 | ENSP00000369497 |
| ENSP00000274255 | ENSP00000378529 |
| ENSP00000274255 | ENSP00000391723 |
| ENSP00000274255 | ENSP00000402084 |
| ENSP00000274255 | ENSP00000413720 |
| ENSP00000274289 | ENSP00000277541 |
| ENSP00000274289 | ENSP00000285873 |
| ENSP00000274289 | ENSP00000288976 |
| ENSP00000274289 | ENSP00000290158 |
| ENSP00000274289 | ENSP00000295951 |
| ENSP00000274289 | ENSP00000296509 |
| ENSP00000274289 | ENSP00000296733 |
| ENSP00000274289 | ENSP00000297338 |
| ENSP00000274289 | ENSP00000298139 |
| ENSP00000274289 | ENSP00000300584 |
| ENSP00000274289 | ENSP00000304226 |
| ENSP00000274289 | ENSP00000307272 |
| ENSP00000274289 | ENSP00000307853 |

|                 |                 |
|-----------------|-----------------|
| ENSP00000274289 | ENSP00000308699 |
| ENSP00000274289 | ENSP00000310649 |
| ENSP00000274289 | ENSP00000317636 |
| ENSP00000274289 | ENSP00000321386 |
| ENSP00000274289 | ENSP00000322218 |
| ENSP00000274289 | ENSP00000322608 |
| ENSP00000274289 | ENSP00000323663 |
| ENSP00000274289 | ENSP00000333873 |
| ENSP00000274289 | ENSP00000335357 |
| ENSP00000274289 | ENSP00000336712 |
| ENSP00000274289 | ENSP00000336868 |
| ENSP00000274289 | ENSP00000342510 |
| ENSP00000274289 | ENSP00000346566 |
| ENSP00000274289 | ENSP00000347232 |
| ENSP00000274289 | ENSP00000348554 |
| ENSP00000274289 | ENSP00000351284 |
| ENSP00000274289 | ENSP00000352572 |
| ENSP00000274289 | ENSP00000354720 |
| ENSP00000274289 | ENSP00000354916 |
| ENSP00000274289 | ENSP00000355922 |
| ENSP00000274289 | ENSP00000359206 |
| ENSP00000274289 | ENSP00000360076 |
| ENSP00000274289 | ENSP00000362578 |
| ENSP00000274289 | ENSP00000363779 |
| ENSP00000274289 | ENSP00000367408 |
| ENSP00000274289 | ENSP00000367638 |
| ENSP00000274289 | ENSP00000368017 |
| ENSP00000274289 | ENSP00000368349 |
| ENSP00000274289 | ENSP00000371308 |
| ENSP00000274289 | ENSP00000371451 |
| ENSP00000274289 | ENSP00000372689 |
| ENSP00000274289 | ENSP00000377655 |
| ENSP00000274289 | ENSP00000378350 |
| ENSP00000274289 | ENSP00000378529 |
| ENSP00000274289 | ENSP00000381932 |
| ENSP00000274289 | ENSP00000382423 |
| ENSP00000274289 | ENSP00000383145 |
| ENSP00000274289 | ENSP00000402527 |
| ENSP00000274311 | ENSP00000287295 |
| ENSP00000274311 | ENSP00000296577 |
| ENSP00000274311 | ENSP00000296674 |
| ENSP00000274311 | ENSP00000302896 |
| ENSP00000274311 | ENSP00000308897 |
| ENSP00000274311 | ENSP00000309561 |
| ENSP00000274311 | ENSP00000310842 |
| ENSP00000274311 | ENSP00000311028 |

|                 |                 |
|-----------------|-----------------|
| ENSP00000274311 | ENSP00000318115 |
| ENSP00000274311 | ENSP00000339095 |
| ENSP00000274311 | ENSP00000346022 |
| ENSP00000274311 | ENSP00000354739 |
| ENSP00000274311 | ENSP00000355541 |
| ENSP00000274311 | ENSP00000356811 |
| ENSP00000274311 | ENSP00000360268 |
| ENSP00000274311 | ENSP00000360532 |
| ENSP00000274311 | ENSP00000364320 |
| ENSP00000274311 | ENSP00000368253 |
| ENSP00000274311 | ENSP00000369162 |
| ENSP00000274311 | ENSP00000369757 |
| ENSP00000274311 | ENSP00000377865 |
| ENSP00000274311 | ENSP00000379339 |
| ENSP00000274311 | ENSP00000388658 |
| ENSP00000274311 | ENSP00000414321 |
| ENSP00000274353 | ENSP00000353701 |
| ENSP00000274368 | ENSP00000296099 |
| ENSP00000274376 | ENSP00000276297 |
| ENSP00000274376 | ENSP00000287600 |
| ENSP00000274376 | ENSP00000295987 |
| ENSP00000274376 | ENSP00000298552 |
| ENSP00000274376 | ENSP00000303042 |
| ENSP00000274376 | ENSP00000303507 |
| ENSP00000274376 | ENSP00000307046 |
| ENSP00000274376 | ENSP00000313829 |
| ENSP00000274376 | ENSP00000316460 |
| ENSP00000274376 | ENSP00000339191 |
| ENSP00000274376 | ENSP00000340019 |
| ENSP00000274376 | ENSP00000342681 |
| ENSP00000274376 | ENSP00000346550 |
| ENSP00000274376 | ENSP00000347184 |
| ENSP00000274376 | ENSP00000356346 |
| ENSP00000274376 | ENSP00000359206 |
| ENSP00000274376 | ENSP00000360922 |
| ENSP00000274376 | ENSP00000363763 |
| ENSP00000274376 | ENSP00000364898 |
| ENSP00000274376 | ENSP00000371897 |
| ENSP00000274376 | ENSP00000376946 |
| ENSP00000274458 | ENSP00000308236 |
| ENSP00000274458 | ENSP00000365401 |
| ENSP00000274458 | ENSP00000419475 |
| ENSP00000274473 | ENSP00000290541 |
| ENSP00000274473 | ENSP00000310094 |
| ENSP00000274473 | ENSP00000310561 |
| ENSP00000274473 | ENSP00000317902 |

|                 |                 |
|-----------------|-----------------|
| ENSP00000274473 | ENSP00000326924 |
| ENSP00000274473 | ENSP00000347532 |
| ENSP00000274473 | ENSP00000352047 |
| ENSP00000274473 | ENSP00000360817 |
| ENSP00000274473 | ENSP00000368612 |
| ENSP00000274473 | ENSP00000381793 |
| ENSP00000274473 | ENSP00000383402 |
| ENSP00000274473 | ENSP00000396976 |
| ENSP00000274532 | ENSP00000344844 |
| ENSP00000274606 | ENSP00000278572 |
| ENSP00000274606 | ENSP00000280557 |
| ENSP00000274606 | ENSP00000283109 |
| ENSP00000274606 | ENSP00000287038 |
| ENSP00000274606 | ENSP00000289371 |
| ENSP00000274606 | ENSP00000294189 |
| ENSP00000274606 | ENSP00000296411 |
| ENSP00000274606 | ENSP00000296577 |
| ENSP00000274606 | ENSP00000296674 |
| ENSP00000274606 | ENSP00000296802 |
| ENSP00000274606 | ENSP00000298283 |
| ENSP00000274606 | ENSP00000298746 |
| ENSP00000274606 | ENSP00000300151 |
| ENSP00000274606 | ENSP00000301585 |
| ENSP00000274606 | ENSP00000302886 |
| ENSP00000274606 | ENSP00000302896 |
| ENSP00000274606 | ENSP00000305702 |
| ENSP00000274606 | ENSP00000306548 |
| ENSP00000274606 | ENSP00000307491 |
| ENSP00000274606 | ENSP00000307525 |
| ENSP00000274606 | ENSP00000307889 |
| ENSP00000274606 | ENSP00000308897 |
| ENSP00000274606 | ENSP00000309334 |
| ENSP00000274606 | ENSP00000309830 |
| ENSP00000274606 | ENSP00000310448 |
| ENSP00000274606 | ENSP00000311028 |
| ENSP00000274606 | ENSP00000311430 |
| ENSP00000274606 | ENSP00000312587 |
| ENSP00000274606 | ENSP00000313674 |
| ENSP00000274606 | ENSP00000314311 |
| ENSP00000274606 | ENSP00000314348 |
| ENSP00000274606 | ENSP00000315182 |
| ENSP00000274606 | ENSP00000317376 |
| ENSP00000274606 | ENSP00000317992 |
| ENSP00000274606 | ENSP00000318646 |
| ENSP00000274606 | ENSP00000320917 |
| ENSP00000274606 | ENSP00000321326 |

|                 |                 |
|-----------------|-----------------|
| ENSP00000274606 | ENSP00000322396 |
| ENSP00000274606 | ENSP00000322419 |
| ENSP00000274606 | ENSP00000323302 |
| ENSP00000274606 | ENSP00000323856 |
| ENSP00000274606 | ENSP00000325312 |
| ENSP00000274606 | ENSP00000326806 |
| ENSP00000274606 | ENSP00000326981 |
| ENSP00000274606 | ENSP00000328854 |
| ENSP00000274606 | ENSP00000331019 |
| ENSP00000274606 | ENSP00000332103 |
| ENSP00000274606 | ENSP00000332198 |
| ENSP00000274606 | ENSP00000336702 |
| ENSP00000274606 | ENSP00000338862 |
| ENSP00000274606 | ENSP00000339095 |
| ENSP00000274606 | ENSP00000339795 |
| ENSP00000274606 | ENSP00000341885 |
| ENSP00000274606 | ENSP00000345096 |
| ENSP00000274606 | ENSP00000345156 |
| ENSP00000274606 | ENSP00000345917 |
| ENSP00000274606 | ENSP00000346015 |
| ENSP00000274606 | ENSP00000346022 |
| ENSP00000274606 | ENSP00000346027 |
| ENSP00000274606 | ENSP00000346037 |
| ENSP00000274606 | ENSP00000346050 |
| ENSP00000274606 | ENSP00000346067 |
| ENSP00000274606 | ENSP00000346088 |
| ENSP00000274606 | ENSP00000346120 |
| ENSP00000274606 | ENSP00000346453 |
| ENSP00000274606 | ENSP00000346725 |
| ENSP00000274606 | ENSP00000350011 |
| ENSP00000274606 | ENSP00000352021 |
| ENSP00000274606 | ENSP00000352738 |
| ENSP00000274606 | ENSP00000354040 |
| ENSP00000274606 | ENSP00000354525 |
| ENSP00000274606 | ENSP00000354739 |
| ENSP00000274606 | ENSP00000354812 |
| ENSP00000274606 | ENSP00000355541 |
| ENSP00000274606 | ENSP00000356410 |
| ENSP00000274606 | ENSP00000358563 |
| ENSP00000274606 | ENSP00000358812 |
| ENSP00000274606 | ENSP00000359345 |
| ENSP00000274606 | ENSP00000359688 |
| ENSP00000274606 | ENSP00000359939 |
| ENSP00000274606 | ENSP00000360031 |
| ENSP00000274606 | ENSP00000360412 |
| ENSP00000274606 | ENSP00000361232 |

|                 |                 |
|-----------------|-----------------|
| ENSP00000274606 | ENSP00000361982 |
| ENSP00000274606 | ENSP00000362744 |
| ENSP00000274606 | ENSP00000363018 |
| ENSP00000274606 | ENSP00000363313 |
| ENSP00000274606 | ENSP00000363384 |
| ENSP00000274606 | ENSP00000363559 |
| ENSP00000274606 | ENSP00000363676 |
| ENSP00000274606 | ENSP00000363944 |
| ENSP00000274606 | ENSP00000364320 |
| ENSP00000274606 | ENSP00000364543 |
| ENSP00000274606 | ENSP00000366519 |
| ENSP00000274606 | ENSP00000369757 |
| ENSP00000274606 | ENSP00000372199 |
| ENSP00000274606 | ENSP00000372827 |
| ENSP00000274606 | ENSP00000373404 |
| ENSP00000274606 | ENSP00000374390 |
| ENSP00000274606 | ENSP00000375730 |
| ENSP00000274606 | ENSP00000377640 |
| ENSP00000274606 | ENSP00000377865 |
| ENSP00000274606 | ENSP00000377969 |
| ENSP00000274606 | ENSP00000378160 |
| ENSP00000274606 | ENSP00000379607 |
| ENSP00000274606 | ENSP00000379888 |
| ENSP00000274606 | ENSP00000380156 |
| ENSP00000274606 | ENSP00000380495 |
| ENSP00000274606 | ENSP00000380982 |
| ENSP00000274606 | ENSP00000382392 |
| ENSP00000274606 | ENSP00000386717 |
| ENSP00000274606 | ENSP00000388464 |
| ENSP00000274606 | ENSP00000389103 |
| ENSP00000274606 | ENSP00000393241 |
| ENSP00000274606 | ENSP00000393393 |
| ENSP00000274606 | ENSP00000394400 |
| ENSP00000274606 | ENSP00000399530 |
| ENSP00000274606 | ENSP00000400626 |
| ENSP00000274606 | ENSP00000402338 |
| ENSP00000274606 | ENSP00000403175 |
| ENSP00000274606 | ENSP00000412310 |
| ENSP00000274606 | ENSP00000412566 |
| ENSP00000274606 | ENSP00000412583 |
| ENSP00000274606 | ENSP00000414321 |
| ENSP00000274606 | ENSP00000416110 |
| ENSP00000274606 | ENSP00000417763 |
| ENSP00000274606 | ENSP00000419740 |
| ENSP00000274606 | ENSP00000420588 |
| ENSP00000274680 | ENSP00000281828 |



|                 |                 |
|-----------------|-----------------|
| ENSP00000274680 | ENSP00000282276 |
| ENSP00000274680 | ENSP00000289371 |
| ENSP00000274680 | ENSP00000298569 |
| ENSP00000274680 | ENSP00000301585 |
| ENSP00000274680 | ENSP00000302114 |
| ENSP00000274680 | ENSP00000302955 |
| ENSP00000274680 | ENSP00000303279 |
| ENSP00000274680 | ENSP00000311766 |
| ENSP00000274680 | ENSP00000317334 |
| ENSP00000274680 | ENSP00000319323 |
| ENSP00000274680 | ENSP00000333376 |
| ENSP00000274680 | ENSP00000335675 |
| ENSP00000274680 | ENSP00000340019 |
| ENSP00000274680 | ENSP00000340093 |
| ENSP00000274680 | ENSP00000341543 |
| ENSP00000274680 | ENSP00000344241 |
| ENSP00000274680 | ENSP00000348886 |
| ENSP00000274680 | ENSP00000351380 |
| ENSP00000274680 | ENSP00000352219 |
| ENSP00000274680 | ENSP00000352738 |
| ENSP00000274680 | ENSP00000354204 |
| ENSP00000274680 | ENSP00000356329 |
| ENSP00000274680 | ENSP00000356405 |
| ENSP00000274680 | ENSP00000356587 |
| ENSP00000274680 | ENSP00000358140 |
| ENSP00000274680 | ENSP00000362576 |
| ENSP00000274680 | ENSP00000364794 |
| ENSP00000274680 | ENSP00000367498 |
| ENSP00000274680 | ENSP00000368140 |
| ENSP00000274680 | ENSP00000370083 |
| ENSP00000274680 | ENSP00000370119 |
| ENSP00000274680 | ENSP00000370377 |
| ENSP00000274680 | ENSP00000370607 |
| ENSP00000274680 | ENSP00000374399 |
| ENSP00000274680 | ENSP00000376946 |
| ENSP00000274680 | ENSP00000379888 |
| ENSP00000274680 | ENSP00000394085 |
| ENSP00000274712 | ENSP00000295488 |
| ENSP00000274712 | ENSP00000296702 |
| ENSP00000274712 | ENSP00000296805 |
| ENSP00000274712 | ENSP00000300413 |
| ENSP00000274712 | ENSP00000301764 |
| ENSP00000274712 | ENSP00000302160 |
| ENSP00000274712 | ENSP00000304350 |
| ENSP00000274712 | ENSP00000305790 |
| ENSP00000274712 | ENSP00000310448 |

|                 |                 |
|-----------------|-----------------|
| ENSP00000274712 | ENSP00000313674 |
| ENSP00000274712 | ENSP00000315035 |
| ENSP00000274712 | ENSP00000315379 |
| ENSP00000274712 | ENSP00000318861 |
| ENSP00000274712 | ENSP00000319341 |
| ENSP00000274712 | ENSP00000323302 |
| ENSP00000274712 | ENSP00000324122 |
| ENSP00000274712 | ENSP00000332103 |
| ENSP00000274712 | ENSP00000335321 |
| ENSP00000274712 | ENSP00000342374 |
| ENSP00000274712 | ENSP00000357631 |
| ENSP00000274712 | ENSP00000359454 |
| ENSP00000274712 | ENSP00000361577 |
| ENSP00000274712 | ENSP00000362110 |
| ENSP00000274712 | ENSP00000363313 |
| ENSP00000274712 | ENSP00000364813 |
| ENSP00000274712 | ENSP00000370589 |
| ENSP00000274712 | ENSP00000372883 |
| ENSP00000274712 | ENSP00000403345 |
| ENSP00000274712 | ENSP00000406280 |
| ENSP00000274712 | ENSP00000410758 |
| ENSP00000274712 | ENSP00000412566 |
| ENSP00000274712 | ENSP00000414006 |
| ENSP00000274712 | ENSP00000414634 |
| ENSP00000274787 | ENSP00000317159 |
| ENSP00000274787 | ENSP00000325562 |
| ENSP00000274787 | ENSP00000336752 |
| ENSP00000274787 | ENSP00000354499 |
| ENSP00000274787 | ENSP00000354876 |
| ENSP00000274787 | ENSP00000354982 |
| ENSP00000274787 | ENSP00000368140 |
| ENSP00000274813 | ENSP00000281317 |
| ENSP00000274813 | ENSP00000301585 |
| ENSP00000274813 | ENSP00000381970 |
| ENSP00000274849 | ENSP00000278572 |
| ENSP00000274849 | ENSP00000291576 |
| ENSP00000274849 | ENSP00000297990 |
| ENSP00000274849 | ENSP00000301364 |
| ENSP00000274849 | ENSP00000305702 |
| ENSP00000274849 | ENSP00000308179 |
| ENSP00000274849 | ENSP00000311135 |
| ENSP00000274849 | ENSP00000314348 |
| ENSP00000274849 | ENSP00000324122 |
| ENSP00000274849 | ENSP00000327179 |
| ENSP00000274849 | ENSP00000332340 |
| ENSP00000274849 | ENSP00000339095 |

|                 |                 |
|-----------------|-----------------|
| ENSP00000274849 | ENSP00000339795 |
| ENSP00000274849 | ENSP00000341885 |
| ENSP00000274849 | ENSP00000354125 |
| ENSP00000274849 | ENSP00000355541 |
| ENSP00000274849 | ENSP00000358812 |
| ENSP00000274849 | ENSP00000363642 |
| ENSP00000274849 | ENSP00000366557 |
| ENSP00000274849 | ENSP00000370589 |
| ENSP00000274849 | ENSP00000371101 |
| ENSP00000274849 | ENSP00000386134 |
| ENSP00000274849 | ENSP00000414321 |
| ENSP00000274849 | ENSP00000417229 |
| ENSP00000274897 | ENSP00000357283 |
| ENSP00000275015 | ENSP00000293362 |
| ENSP00000275015 | ENSP00000295025 |
| ENSP00000275015 | ENSP00000297185 |
| ENSP00000275015 | ENSP00000313420 |
| ENSP00000275015 | ENSP00000314556 |
| ENSP00000275015 | ENSP00000318115 |
| ENSP00000275015 | ENSP00000348551 |
| ENSP00000275015 | ENSP00000349748 |
| ENSP00000275015 | ENSP00000351416 |
| ENSP00000275015 | ENSP00000355890 |
| ENSP00000275015 | ENSP00000359727 |
| ENSP00000275015 | ENSP00000364794 |
| ENSP00000275015 | ENSP00000368797 |
| ENSP00000275015 | ENSP00000379093 |
| ENSP00000275053 | ENSP00000278412 |
| ENSP00000275053 | ENSP00000281708 |
| ENSP00000275053 | ENSP00000386239 |
| ENSP00000275428 | ENSP00000319531 |
| ENSP00000275517 | ENSP00000296257 |
| ENSP00000275517 | ENSP00000297338 |
| ENSP00000275517 | ENSP00000313851 |
| ENSP00000275517 | ENSP00000341382 |
| ENSP00000275517 | ENSP00000352257 |
| ENSP00000275517 | ENSP00000354720 |
| ENSP00000275517 | ENSP00000358497 |
| ENSP00000275605 | ENSP00000302620 |
| ENSP00000275605 | ENSP00000302896 |
| ENSP00000275605 | ENSP00000331817 |
| ENSP00000275605 | ENSP00000333667 |
| ENSP00000275605 | ENSP00000363021 |
| ENSP00000275605 | ENSP00000365534 |
| ENSP00000275605 | ENSP00000365837 |
| ENSP00000275605 | ENSP00000374213 |

|                 |                 |
|-----------------|-----------------|
| ENSP00000275605 | ENSP00000382595 |
| ENSP00000275635 | ENSP00000356505 |
| ENSP00000275635 | ENSP00000384675 |
| ENSP00000275699 | ENSP00000300101 |
| ENSP00000275730 | ENSP00000292476 |
| ENSP00000275730 | ENSP00000302790 |
| ENSP00000275730 | ENSP00000372857 |
| ENSP00000275780 | ENSP00000278919 |
| ENSP00000275780 | ENSP00000293925 |
| ENSP00000275780 | ENSP00000295951 |
| ENSP00000275780 | ENSP00000301019 |
| ENSP00000275780 | ENSP00000324020 |
| ENSP00000275780 | ENSP00000329411 |
| ENSP00000275780 | ENSP00000336587 |
| ENSP00000275780 | ENSP00000348273 |
| ENSP00000275780 | ENSP00000362578 |
| ENSP00000275820 | ENSP00000279230 |
| ENSP00000275820 | ENSP00000295488 |
| ENSP00000275820 | ENSP00000323511 |
| ENSP00000275820 | ENSP00000327179 |
| ENSP00000275820 | ENSP00000345988 |
| ENSP00000275820 | ENSP00000359454 |
| ENSP00000275820 | ENSP00000359837 |
| ENSP00000275820 | ENSP00000366179 |
| ENSP00000275820 | ENSP00000368565 |
| ENSP00000275820 | ENSP00000384302 |
| ENSP00000276014 | ENSP00000281708 |
| ENSP00000276014 | ENSP00000287598 |
| ENSP00000276014 | ENSP00000296509 |
| ENSP00000276014 | ENSP00000298048 |
| ENSP00000276014 | ENSP00000302530 |
| ENSP00000276014 | ENSP00000306999 |
| ENSP00000276014 | ENSP00000307023 |
| ENSP00000276014 | ENSP00000307853 |
| ENSP00000276014 | ENSP00000309871 |
| ENSP00000276014 | ENSP00000310649 |
| ENSP00000276014 | ENSP00000311083 |
| ENSP00000276014 | ENSP00000317156 |
| ENSP00000276014 | ENSP00000320130 |
| ENSP00000276014 | ENSP00000322180 |
| ENSP00000276014 | ENSP00000334188 |
| ENSP00000276014 | ENSP00000343741 |
| ENSP00000276014 | ENSP00000344460 |
| ENSP00000276014 | ENSP00000346566 |
| ENSP00000276014 | ENSP00000348965 |
| ENSP00000276014 | ENSP00000351665 |

|                 |                 |
|-----------------|-----------------|
| ENSP00000276014 | ENSP00000353622 |
| ENSP00000276014 | ENSP00000353698 |
| ENSP00000276014 | ENSP00000353793 |
| ENSP00000276014 | ENSP00000354916 |
| ENSP00000276014 | ENSP00000356405 |
| ENSP00000276014 | ENSP00000356989 |
| ENSP00000276014 | ENSP00000360147 |
| ENSP00000276014 | ENSP00000360621 |
| ENSP00000276014 | ENSP00000361465 |
| ENSP00000276014 | ENSP00000362171 |
| ENSP00000276014 | ENSP00000363827 |
| ENSP00000276014 | ENSP00000368976 |
| ENSP00000276014 | ENSP00000372023 |
| ENSP00000276014 | ENSP00000377793 |
| ENSP00000276014 | ENSP00000378529 |
| ENSP00000276014 | ENSP00000384675 |
| ENSP00000276062 | ENSP00000296028 |
| ENSP00000276062 | ENSP00000300651 |
| ENSP00000276062 | ENSP00000357484 |
| ENSP00000276072 | ENSP00000283195 |
| ENSP00000276072 | ENSP00000283875 |
| ENSP00000276072 | ENSP00000285896 |
| ENSP00000276072 | ENSP00000290524 |
| ENSP00000276072 | ENSP00000293406 |
| ENSP00000276072 | ENSP00000296328 |
| ENSP00000276072 | ENSP00000299424 |
| ENSP00000276072 | ENSP00000302640 |
| ENSP00000276072 | ENSP00000306245 |
| ENSP00000276072 | ENSP00000306983 |
| ENSP00000276072 | ENSP00000307208 |
| ENSP00000276072 | ENSP00000307684 |
| ENSP00000276072 | ENSP00000314949 |
| ENSP00000276072 | ENSP00000320949 |
| ENSP00000276072 | ENSP00000322570 |
| ENSP00000276072 | ENSP00000329029 |
| ENSP00000276072 | ENSP00000332171 |
| ENSP00000276072 | ENSP00000333920 |
| ENSP00000276072 | ENSP00000340896 |
| ENSP00000276072 | ENSP00000341805 |
| ENSP00000276072 | ENSP00000344537 |
| ENSP00000276072 | ENSP00000345702 |
| ENSP00000276072 | ENSP00000345793 |
| ENSP00000276072 | ENSP00000348168 |
| ENSP00000276072 | ENSP00000349213 |
| ENSP00000276072 | ENSP00000351490 |
| ENSP00000276072 | ENSP00000351697 |

|                 |                 |
|-----------------|-----------------|
| ENSP00000276072 | ENSP00000353622 |
| ENSP00000276072 | ENSP00000354633 |
| ENSP00000276072 | ENSP00000354673 |
| ENSP00000276072 | ENSP00000355051 |
| ENSP00000276072 | ENSP00000355205 |
| ENSP00000276072 | ENSP00000355759 |
| ENSP00000276072 | ENSP00000357047 |
| ENSP00000276072 | ENSP00000357494 |
| ENSP00000276072 | ENSP00000358854 |
| ENSP00000276072 | ENSP00000358886 |
| ENSP00000276072 | ENSP00000359290 |
| ENSP00000276072 | ENSP00000359531 |
| ENSP00000276072 | ENSP00000360329 |
| ENSP00000276072 | ENSP00000360515 |
| ENSP00000276072 | ENSP00000361998 |
| ENSP00000276072 | ENSP00000362068 |
| ENSP00000276072 | ENSP00000366974 |
| ENSP00000276072 | ENSP00000367406 |
| ENSP00000276072 | ENSP00000368349 |
| ENSP00000276072 | ENSP00000369695 |
| ENSP00000276072 | ENSP00000372170 |
| ENSP00000276072 | ENSP00000374213 |
| ENSP00000276072 | ENSP00000377969 |
| ENSP00000276072 | ENSP00000378160 |
| ENSP00000276072 | ENSP00000378394 |
| ENSP00000276072 | ENSP00000379372 |
| ENSP00000276072 | ENSP00000380982 |
| ENSP00000276072 | ENSP00000381031 |
| ENSP00000276072 | ENSP00000384597 |
| ENSP00000276072 | ENSP00000386621 |
| ENSP00000276072 | ENSP00000386717 |
| ENSP00000276072 | ENSP00000388872 |
| ENSP00000276072 | ENSP00000417281 |
| ENSP00000276201 | ENSP00000280665 |
| ENSP00000276201 | ENSP00000296577 |
| ENSP00000276201 | ENSP00000310596 |
| ENSP00000276201 | ENSP00000315791 |
| ENSP00000276201 | ENSP00000315859 |
| ENSP00000276201 | ENSP00000316879 |
| ENSP00000276201 | ENSP00000317872 |
| ENSP00000276201 | ENSP00000326767 |
| ENSP00000276201 | ENSP00000326806 |
| ENSP00000276201 | ENSP00000331817 |
| ENSP00000276201 | ENSP00000334808 |
| ENSP00000276201 | ENSP00000338862 |
| ENSP00000276201 | ENSP00000340823 |

|                 |                 |
|-----------------|-----------------|
| ENSP00000276201 | ENSP00000347733 |
| ENSP00000276201 | ENSP00000348708 |
| ENSP00000276201 | ENSP00000349640 |
| ENSP00000276201 | ENSP00000352400 |
| ENSP00000276201 | ENSP00000353741 |
| ENSP00000276201 | ENSP00000355261 |
| ENSP00000276201 | ENSP00000356989 |
| ENSP00000276201 | ENSP00000361557 |
| ENSP00000276201 | ENSP00000362135 |
| ENSP00000276201 | ENSP00000364289 |
| ENSP00000276201 | ENSP00000379607 |
| ENSP00000276201 | ENSP00000391432 |
| ENSP00000276201 | ENSP00000402240 |
| ENSP00000276201 | ENSP00000402515 |
| ENSP00000276297 | ENSP00000292894 |
| ENSP00000276297 | ENSP00000315702 |
| ENSP00000276297 | ENSP00000325423 |
| ENSP00000276297 | ENSP00000347948 |
| ENSP00000276297 | ENSP00000361027 |
| ENSP00000276297 | ENSP00000379290 |
| ENSP00000276326 | ENSP00000282050 |
| ENSP00000276326 | ENSP00000292385 |
| ENSP00000276326 | ENSP00000295897 |
| ENSP00000276326 | ENSP00000295901 |
| ENSP00000276326 | ENSP00000296255 |
| ENSP00000276326 | ENSP00000296930 |
| ENSP00000276326 | ENSP00000297185 |
| ENSP00000276326 | ENSP00000298852 |
| ENSP00000276326 | ENSP00000309629 |
| ENSP00000276326 | ENSP00000310129 |
| ENSP00000276326 | ENSP00000311766 |
| ENSP00000276326 | ENSP00000314556 |
| ENSP00000276326 | ENSP00000317334 |
| ENSP00000276326 | ENSP00000318195 |
| ENSP00000276326 | ENSP00000319169 |
| ENSP00000276326 | ENSP00000321546 |
| ENSP00000276326 | ENSP00000324573 |
| ENSP00000276326 | ENSP00000325785 |
| ENSP00000276326 | ENSP00000327821 |
| ENSP00000276326 | ENSP00000328088 |
| ENSP00000276326 | ENSP00000338814 |
| ENSP00000276326 | ENSP00000348784 |
| ENSP00000276326 | ENSP00000354720 |
| ENSP00000276326 | ENSP00000354739 |
| ENSP00000276326 | ENSP00000357048 |
| ENSP00000276326 | ENSP00000358417 |

|                 |                 |
|-----------------|-----------------|
| ENSP00000276326 | ENSP00000358994 |
| ENSP00000276326 | ENSP00000369042 |
| ENSP00000276326 | ENSP00000370517 |
| ENSP00000276326 | ENSP00000379888 |
| ENSP00000276326 | ENSP00000380921 |
| ENSP00000276326 | ENSP00000382177 |
| ENSP00000276326 | ENSP00000407487 |
| ENSP00000276326 | ENSP00000407879 |
| ENSP00000276414 | ENSP00000416959 |
| ENSP00000276416 | ENSP00000277865 |
| ENSP00000276416 | ENSP00000286428 |
| ENSP00000276416 | ENSP00000292385 |
| ENSP00000276416 | ENSP00000301843 |
| ENSP00000276416 | ENSP00000310621 |
| ENSP00000276416 | ENSP00000311005 |
| ENSP00000276416 | ENSP00000315659 |
| ENSP00000276416 | ENSP00000316845 |
| ENSP00000276416 | ENSP00000317468 |
| ENSP00000276416 | ENSP00000320566 |
| ENSP00000276416 | ENSP00000320924 |
| ENSP00000276416 | ENSP00000326238 |
| ENSP00000276416 | ENSP00000334188 |
| ENSP00000276416 | ENSP00000338967 |
| ENSP00000276416 | ENSP00000345728 |
| ENSP00000276416 | ENSP00000347919 |
| ENSP00000276416 | ENSP00000348163 |
| ENSP00000276416 | ENSP00000348215 |
| ENSP00000276416 | ENSP00000349877 |
| ENSP00000276416 | ENSP00000350708 |
| ENSP00000276416 | ENSP00000352802 |
| ENSP00000276416 | ENSP00000353622 |
| ENSP00000276416 | ENSP00000354558 |
| ENSP00000276416 | ENSP00000354927 |
| ENSP00000276416 | ENSP00000356989 |
| ENSP00000276416 | ENSP00000358812 |
| ENSP00000276416 | ENSP00000358831 |
| ENSP00000276416 | ENSP00000360798 |
| ENSP00000276416 | ENSP00000362115 |
| ENSP00000276416 | ENSP00000363734 |
| ENSP00000276416 | ENSP00000365005 |
| ENSP00000276416 | ENSP00000365891 |
| ENSP00000276416 | ENSP00000366863 |
| ENSP00000276416 | ENSP00000369042 |
| ENSP00000276416 | ENSP00000370377 |
| ENSP00000276416 | ENSP00000372694 |
| ENSP00000276416 | ENSP00000380460 |



|                 |                 |
|-----------------|-----------------|
| ENSP00000276416 | ENSP00000386878 |
| ENSP00000276416 | ENSP00000391249 |
| ENSP00000276416 | ENSP00000397598 |
| ENSP00000276416 | ENSP00000412319 |
| ENSP00000276416 | ENSP00000413625 |
| ENSP00000276416 | ENSP00000415678 |
| ENSP00000276416 | ENSP00000419599 |
| ENSP00000276533 | ENSP00000278412 |
| ENSP00000276533 | ENSP00000312870 |
| ENSP00000276533 | ENSP00000322570 |
| ENSP00000276533 | ENSP00000350491 |
| ENSP00000276533 | ENSP00000353793 |
| ENSP00000276533 | ENSP00000354522 |
| ENSP00000276533 | ENSP00000368349 |
| ENSP00000276533 | ENSP00000380504 |
| ENSP00000276533 | ENSP00000401018 |
| ENSP00000276533 | ENSP00000413632 |
| ENSP00000276569 | ENSP00000281172 |
| ENSP00000276570 | ENSP00000294053 |
| ENSP00000276570 | ENSP00000303191 |
| ENSP00000276570 | ENSP00000304350 |
| ENSP00000276570 | ENSP00000305790 |
| ENSP00000276570 | ENSP00000329558 |
| ENSP00000276570 | ENSP00000332103 |
| ENSP00000276570 | ENSP00000335321 |
| ENSP00000276570 | ENSP00000342374 |
| ENSP00000276570 | ENSP00000351137 |
| ENSP00000276570 | ENSP00000360532 |
| ENSP00000276570 | ENSP00000361577 |
| ENSP00000276570 | ENSP00000362110 |
| ENSP00000276570 | ENSP00000366557 |
| ENSP00000276570 | ENSP00000412566 |
| ENSP00000276585 | ENSP00000301585 |
| ENSP00000276585 | ENSP00000301962 |
| ENSP00000276590 | ENSP00000299601 |
| ENSP00000276603 | ENSP00000278616 |
| ENSP00000276603 | ENSP00000280097 |
| ENSP00000276603 | ENSP00000281623 |
| ENSP00000276603 | ENSP00000283871 |
| ENSP00000276603 | ENSP00000287647 |
| ENSP00000276603 | ENSP00000288602 |
| ENSP00000276603 | ENSP00000288757 |
| ENSP00000276603 | ENSP00000290158 |
| ENSP00000276603 | ENSP00000290291 |
| ENSP00000276603 | ENSP00000292385 |
| ENSP00000276603 | ENSP00000294740 |

|                 |                 |
|-----------------|-----------------|
| ENSP00000276603 | ENSP00000299767 |
| ENSP00000276603 | ENSP00000300086 |
| ENSP00000276603 | ENSP00000300417 |
| ENSP00000276603 | ENSP00000300961 |
| ENSP00000276603 | ENSP00000301011 |
| ENSP00000276603 | ENSP00000301764 |
| ENSP00000276603 | ENSP00000302647 |
| ENSP00000276603 | ENSP00000302886 |
| ENSP00000276603 | ENSP00000303042 |
| ENSP00000276603 | ENSP00000303712 |
| ENSP00000276603 | ENSP00000304854 |
| ENSP00000276603 | ENSP00000305631 |
| ENSP00000276603 | ENSP00000309572 |
| ENSP00000276603 | ENSP00000309629 |
| ENSP00000276603 | ENSP00000310723 |
| ENSP00000276603 | ENSP00000311579 |
| ENSP00000276603 | ENSP00000313420 |
| ENSP00000276603 | ENSP00000314311 |
| ENSP00000276603 | ENSP00000319169 |
| ENSP00000276603 | ENSP00000321259 |
| ENSP00000276603 | ENSP00000322242 |
| ENSP00000276603 | ENSP00000324884 |
| ENSP00000276603 | ENSP00000325677 |
| ENSP00000276603 | ENSP00000325941 |
| ENSP00000276603 | ENSP00000328187 |
| ENSP00000276603 | ENSP00000328671 |
| ENSP00000276603 | ENSP00000328690 |
| ENSP00000276603 | ENSP00000328773 |
| ENSP00000276603 | ENSP00000334040 |
| ENSP00000276603 | ENSP00000334836 |
| ENSP00000276603 | ENSP00000336927 |
| ENSP00000276603 | ENSP00000337838 |
| ENSP00000276603 | ENSP00000338573 |
| ENSP00000276603 | ENSP00000338989 |
| ENSP00000276603 | ENSP00000339095 |
| ENSP00000276603 | ENSP00000340466 |
| ENSP00000276603 | ENSP00000341885 |
| ENSP00000276603 | ENSP00000342026 |
| ENSP00000276603 | ENSP00000343023 |
| ENSP00000276603 | ENSP00000343657 |
| ENSP00000276603 | ENSP00000344106 |
| ENSP00000276603 | ENSP00000344547 |
| ENSP00000276603 | ENSP00000345917 |
| ENSP00000276603 | ENSP00000346065 |
| ENSP00000276603 | ENSP00000346120 |
| ENSP00000276603 | ENSP00000347232 |

|                 |                 |
|-----------------|-----------------|
| ENSP00000276603 | ENSP00000347495 |
| ENSP00000276603 | ENSP00000347592 |
| ENSP00000276603 | ENSP00000347719 |
| ENSP00000276603 | ENSP00000348602 |
| ENSP00000276603 | ENSP00000349393 |
| ENSP00000276603 | ENSP00000350249 |
| ENSP00000276603 | ENSP00000350283 |
| ENSP00000276603 | ENSP00000352021 |
| ENSP00000276603 | ENSP00000353375 |
| ENSP00000276603 | ENSP00000353701 |
| ENSP00000276603 | ENSP00000354558 |
| ENSP00000276603 | ENSP00000354620 |
| ENSP00000276603 | ENSP00000354826 |
| ENSP00000276603 | ENSP00000354848 |
| ENSP00000276603 | ENSP00000355922 |
| ENSP00000276603 | ENSP00000356591 |
| ENSP00000276603 | ENSP00000357711 |
| ENSP00000276603 | ENSP00000358081 |
| ENSP00000276603 | ENSP00000358576 |
| ENSP00000276603 | ENSP00000358718 |
| ENSP00000276603 | ENSP00000361202 |
| ENSP00000276603 | ENSP00000361467 |
| ENSP00000276603 | ENSP00000361824 |
| ENSP00000276603 | ENSP00000361894 |
| ENSP00000276603 | ENSP00000361949 |
| ENSP00000276603 | ENSP00000364898 |
| ENSP00000276603 | ENSP00000366156 |
| ENSP00000276603 | ENSP00000367086 |
| ENSP00000276603 | ENSP00000367406 |
| ENSP00000276603 | ENSP00000367787 |
| ENSP00000276603 | ENSP00000368646 |
| ENSP00000276603 | ENSP00000369843 |
| ENSP00000276603 | ENSP00000370517 |
| ENSP00000276603 | ENSP00000371475 |
| ENSP00000276603 | ENSP00000372689 |
| ENSP00000276603 | ENSP00000377496 |
| ENSP00000276603 | ENSP00000379372 |
| ENSP00000276603 | ENSP00000379888 |
| ENSP00000276603 | ENSP00000379933 |
| ENSP00000276603 | ENSP00000382595 |
| ENSP00000276603 | ENSP00000384160 |
| ENSP00000276603 | ENSP00000384312 |
| ENSP00000276603 | ENSP00000391944 |
| ENSP00000276603 | ENSP00000394390 |
| ENSP00000276603 | ENSP00000396439 |
| ENSP00000276603 | ENSP00000403536 |

|                 |                 |
|-----------------|-----------------|
| ENSP00000276646 | ENSP00000294189 |
| ENSP00000276646 | ENSP00000326514 |
| ENSP00000276646 | ENSP00000341680 |
| ENSP00000276654 | ENSP00000357674 |
| ENSP00000276689 | ENSP00000317872 |
| ENSP00000276689 | ENSP00000326699 |
| ENSP00000276692 | ENSP00000284719 |
| ENSP00000276692 | ENSP00000348107 |
| ENSP00000276692 | ENSP00000348554 |
| ENSP00000276692 | ENSP00000368984 |
| ENSP00000276692 | ENSP00000396704 |
| ENSP00000276893 | ENSP00000293288 |
| ENSP00000276893 | ENSP00000297273 |
| ENSP00000276893 | ENSP00000302120 |
| ENSP00000276893 | ENSP00000307853 |
| ENSP00000276893 | ENSP00000339897 |
| ENSP00000276893 | ENSP00000344456 |
| ENSP00000276893 | ENSP00000348632 |
| ENSP00000276893 | ENSP00000352516 |
| ENSP00000276893 | ENSP00000356346 |
| ENSP00000276893 | ENSP00000358022 |
| ENSP00000276893 | ENSP00000358770 |
| ENSP00000276893 | ENSP00000368438 |
| ENSP00000276893 | ENSP00000417281 |
| ENSP00000277010 | ENSP00000285949 |
| ENSP00000277010 | ENSP00000299626 |
| ENSP00000277010 | ENSP00000301825 |
| ENSP00000277010 | ENSP00000310721 |
| ENSP00000277010 | ENSP00000317334 |
| ENSP00000277010 | ENSP00000320604 |
| ENSP00000277010 | ENSP00000325425 |
| ENSP00000277010 | ENSP00000330812 |
| ENSP00000277010 | ENSP00000331268 |
| ENSP00000277010 | ENSP00000333946 |
| ENSP00000277010 | ENSP00000341662 |
| ENSP00000277010 | ENSP00000346809 |
| ENSP00000277010 | ENSP00000348380 |
| ENSP00000277010 | ENSP00000349887 |
| ENSP00000277010 | ENSP00000350263 |
| ENSP00000277010 | ENSP00000351520 |
| ENSP00000277010 | ENSP00000353073 |
| ENSP00000277010 | ENSP00000354238 |
| ENSP00000277010 | ENSP00000355517 |
| ENSP00000277010 | ENSP00000355601 |
| ENSP00000277010 | ENSP00000358831 |
| ENSP00000277010 | ENSP00000360149 |

|                 |                 |
|-----------------|-----------------|
| ENSP00000277010 | ENSP00000360918 |
| ENSP00000277010 | ENSP00000365567 |
| ENSP00000277010 | ENSP00000365840 |
| ENSP00000277010 | ENSP00000380793 |
| ENSP00000277010 | ENSP00000387019 |
| ENSP00000277010 | ENSP00000401445 |
| ENSP00000277010 | ENSP00000415203 |
| ENSP00000277165 | ENSP00000329466 |
| ENSP00000277165 | ENSP00000355231 |
| ENSP00000277165 | ENSP00000379607 |
| ENSP00000277225 | ENSP00000417281 |
| ENSP00000277458 | ENSP00000284811 |
| ENSP00000277458 | ENSP00000337163 |
| ENSP00000277480 | ENSP00000361405 |
| ENSP00000277480 | ENSP00000369816 |
| ENSP00000277480 | ENSP00000380349 |
| ENSP00000277508 | ENSP00000356346 |
| ENSP00000277541 | ENSP00000280700 |
| ENSP00000277541 | ENSP00000281537 |
| ENSP00000277541 | ENSP00000281708 |
| ENSP00000277541 | ENSP00000282516 |
| ENSP00000277541 | ENSP00000284981 |
| ENSP00000277541 | ENSP00000292476 |
| ENSP00000277541 | ENSP00000294785 |
| ENSP00000277541 | ENSP00000295025 |
| ENSP00000277541 | ENSP00000295902 |
| ENSP00000277541 | ENSP00000302216 |
| ENSP00000277541 | ENSP00000307491 |
| ENSP00000277541 | ENSP00000309968 |
| ENSP00000277541 | ENSP00000310040 |
| ENSP00000277541 | ENSP00000311825 |
| ENSP00000277541 | ENSP00000312150 |
| ENSP00000277541 | ENSP00000322885 |
| ENSP00000277541 | ENSP00000326366 |
| ENSP00000277541 | ENSP00000328169 |
| ENSP00000277541 | ENSP00000331057 |
| ENSP00000277541 | ENSP00000331201 |
| ENSP00000277541 | ENSP00000331608 |
| ENSP00000277541 | ENSP00000332353 |
| ENSP00000277541 | ENSP00000339299 |
| ENSP00000277541 | ENSP00000344456 |
| ENSP00000277541 | ENSP00000345731 |
| ENSP00000277541 | ENSP00000347169 |
| ENSP00000277541 | ENSP00000347733 |
| ENSP00000277541 | ENSP00000348550 |
| ENSP00000277541 | ENSP00000349486 |

|                 |                 |
|-----------------|-----------------|
| ENSP00000277541 | ENSP00000352121 |
| ENSP00000277541 | ENSP00000352257 |
| ENSP00000277541 | ENSP00000352516 |
| ENSP00000277541 | ENSP00000353344 |
| ENSP00000277541 | ENSP00000355580 |
| ENSP00000277541 | ENSP00000355809 |
| ENSP00000277541 | ENSP00000357348 |
| ENSP00000277541 | ENSP00000357484 |
| ENSP00000277541 | ENSP00000358997 |
| ENSP00000277541 | ENSP00000359474 |
| ENSP00000277541 | ENSP00000363921 |
| ENSP00000277541 | ENSP00000364293 |
| ENSP00000277541 | ENSP00000364902 |
| ENSP00000277541 | ENSP00000364912 |
| ENSP00000277541 | ENSP00000365439 |
| ENSP00000277541 | ENSP00000365735 |
| ENSP00000277541 | ENSP00000365891 |
| ENSP00000277541 | ENSP00000377265 |
| ENSP00000277541 | ENSP00000378132 |
| ENSP00000277541 | ENSP00000381293 |
| ENSP00000277541 | ENSP00000383623 |
| ENSP00000277541 | ENSP00000392466 |
| ENSP00000277541 | ENSP00000402084 |
| ENSP00000277541 | ENSP00000417281 |
| ENSP00000277554 | ENSP00000281172 |
| ENSP00000277554 | ENSP00000308944 |
| ENSP00000277554 | ENSP00000328940 |
| ENSP00000277554 | ENSP00000330343 |
| ENSP00000277554 | ENSP00000358478 |
| ENSP00000277554 | ENSP00000364895 |
| ENSP00000277570 | ENSP00000281172 |
| ENSP00000277570 | ENSP00000339245 |
| ENSP00000277570 | ENSP00000350249 |
| ENSP00000277575 | ENSP00000281172 |
| ENSP00000277575 | ENSP00000360916 |
| ENSP00000277632 | ENSP00000350512 |
| ENSP00000277657 | ENSP00000381031 |
| ENSP00000277746 | ENSP00000302886 |
| ENSP00000277746 | ENSP00000324560 |
| ENSP00000277746 | ENSP00000352928 |
| ENSP00000277746 | ENSP00000355231 |
| ENSP00000277746 | ENSP00000362413 |
| ENSP00000277865 | ENSP00000282541 |
| ENSP00000277865 | ENSP00000290597 |
| ENSP00000277865 | ENSP00000290649 |
| ENSP00000277865 | ENSP00000292475 |

|                 |                 |
|-----------------|-----------------|
| ENSP00000277865 | ENSP00000293195 |
| ENSP00000277865 | ENSP00000301585 |
| ENSP00000277865 | ENSP00000301587 |
| ENSP00000277865 | ENSP00000304592 |
| ENSP00000277865 | ENSP00000308610 |
| ENSP00000277865 | ENSP00000310596 |
| ENSP00000277865 | ENSP00000312042 |
| ENSP00000277865 | ENSP00000337688 |
| ENSP00000277865 | ENSP00000339933 |
| ENSP00000277865 | ENSP00000340019 |
| ENSP00000277865 | ENSP00000341208 |
| ENSP00000277865 | ENSP00000341838 |
| ENSP00000277865 | ENSP00000342564 |
| ENSP00000277865 | ENSP00000347140 |
| ENSP00000277865 | ENSP00000348602 |
| ENSP00000277865 | ENSP00000348877 |
| ENSP00000277865 | ENSP00000354957 |
| ENSP00000277865 | ENSP00000358737 |
| ENSP00000277865 | ENSP00000359211 |
| ENSP00000277865 | ENSP00000361064 |
| ENSP00000277865 | ENSP00000366395 |
| ENSP00000277865 | ENSP00000368226 |
| ENSP00000277865 | ENSP00000371888 |
| ENSP00000277865 | ENSP00000377954 |
| ENSP00000277865 | ENSP00000379065 |
| ENSP00000278060 | ENSP00000366156 |
| ENSP00000278060 | ENSP00000408058 |
| ENSP00000278070 | ENSP00000284811 |
| ENSP00000278070 | ENSP00000339527 |
| ENSP00000278175 | ENSP00000368683 |
| ENSP00000278243 | ENSP00000306124 |
| ENSP00000278243 | ENSP00000326699 |
| ENSP00000278243 | ENSP00000359552 |
| ENSP00000278282 | ENSP00000346839 |
| ENSP00000278282 | ENSP00000367064 |
| ENSP00000278379 | ENSP00000340820 |
| ENSP00000278407 | ENSP00000295897 |
| ENSP00000278412 | ENSP00000278616 |
| ENSP00000278412 | ENSP00000283351 |
| ENSP00000278412 | ENSP00000283875 |
| ENSP00000278412 | ENSP00000283882 |
| ENSP00000278412 | ENSP00000286428 |
| ENSP00000278412 | ENSP00000287598 |
| ENSP00000278412 | ENSP00000290649 |
| ENSP00000278412 | ENSP00000295321 |
| ENSP00000278412 | ENSP00000295926 |

|                 |                 |
|-----------------|-----------------|
| ENSP00000278412 | ENSP00000296273 |
| ENSP00000278412 | ENSP00000297338 |
| ENSP00000278412 | ENSP00000299601 |
| ENSP00000278412 | ENSP00000299853 |
| ENSP00000278412 | ENSP00000300648 |
| ENSP00000278412 | ENSP00000300738 |
| ENSP00000278412 | ENSP00000301364 |
| ENSP00000278412 | ENSP00000302111 |
| ENSP00000278412 | ENSP00000302530 |
| ENSP00000278412 | ENSP00000302640 |
| ENSP00000278412 | ENSP00000302955 |
| ENSP00000278412 | ENSP00000304668 |
| ENSP00000278412 | ENSP00000305958 |
| ENSP00000278412 | ENSP00000307684 |
| ENSP00000278412 | ENSP00000310966 |
| ENSP00000278412 | ENSP00000311873 |
| ENSP00000278412 | ENSP00000313171 |
| ENSP00000278412 | ENSP00000313420 |
| ENSP00000278412 | ENSP00000314949 |
| ENSP00000278412 | ENSP00000319104 |
| ENSP00000278412 | ENSP00000320488 |
| ENSP00000278412 | ENSP00000320885 |
| ENSP00000278412 | ENSP00000321636 |
| ENSP00000278412 | ENSP00000322570 |
| ENSP00000278412 | ENSP00000325448 |
| ENSP00000278412 | ENSP00000332995 |
| ENSP00000278412 | ENSP00000333667 |
| ENSP00000278412 | ENSP00000334061 |
| ENSP00000278412 | ENSP00000334538 |
| ENSP00000278412 | ENSP00000335357 |
| ENSP00000278412 | ENSP00000336856 |
| ENSP00000278412 | ENSP00000338990 |
| ENSP00000278412 | ENSP00000340823 |
| ENSP00000278412 | ENSP00000341243 |
| ENSP00000278412 | ENSP00000343190 |
| ENSP00000278412 | ENSP00000343741 |
| ENSP00000278412 | ENSP00000344504 |
| ENSP00000278412 | ENSP00000344741 |
| ENSP00000278412 | ENSP00000346120 |
| ENSP00000278412 | ENSP00000347733 |
| ENSP00000278412 | ENSP00000351250 |
| ENSP00000278412 | ENSP00000351697 |
| ENSP00000278412 | ENSP00000351947 |
| ENSP00000278412 | ENSP00000352121 |
| ENSP00000278412 | ENSP00000353793 |
| ENSP00000278412 | ENSP00000354522 |



|                 |                 |
|-----------------|-----------------|
| ENSP00000278412 | ENSP00000354558 |
| ENSP00000278412 | ENSP00000355013 |
| ENSP00000278412 | ENSP00000355388 |
| ENSP00000278412 | ENSP00000356405 |
| ENSP00000278412 | ENSP00000356520 |
| ENSP00000278412 | ENSP00000358812 |
| ENSP00000278412 | ENSP00000359305 |
| ENSP00000278412 | ENSP00000359531 |
| ENSP00000278412 | ENSP00000360515 |
| ENSP00000278412 | ENSP00000360621 |
| ENSP00000278412 | ENSP00000360817 |
| ENSP00000278412 | ENSP00000361642 |
| ENSP00000278412 | ENSP00000362171 |
| ENSP00000278412 | ENSP00000362592 |
| ENSP00000278412 | ENSP00000362744 |
| ENSP00000278412 | ENSP00000364289 |
| ENSP00000278412 | ENSP00000365025 |
| ENSP00000278412 | ENSP00000365877 |
| ENSP00000278412 | ENSP00000366135 |
| ENSP00000278412 | ENSP00000366395 |
| ENSP00000278412 | ENSP00000366974 |
| ENSP00000278412 | ENSP00000367029 |
| ENSP00000278412 | ENSP00000368349 |
| ENSP00000278412 | ENSP00000369411 |
| ENSP00000278412 | ENSP00000369757 |
| ENSP00000278412 | ENSP00000370151 |
| ENSP00000278412 | ENSP00000374280 |
| ENSP00000278412 | ENSP00000377793 |
| ENSP00000278412 | ENSP00000379607 |
| ENSP00000278412 | ENSP00000380129 |
| ENSP00000278412 | ENSP00000380414 |
| ENSP00000278412 | ENSP00000380702 |
| ENSP00000278412 | ENSP00000386227 |
| ENSP00000278412 | ENSP00000386239 |
| ENSP00000278412 | ENSP00000386759 |
| ENSP00000278412 | ENSP00000392617 |
| ENSP00000278412 | ENSP00000396704 |
| ENSP00000278412 | ENSP00000402515 |
| ENSP00000278412 | ENSP00000403852 |
| ENSP00000278412 | ENSP00000404658 |
| ENSP00000278412 | ENSP00000412553 |
| ENSP00000278412 | ENSP00000420588 |
| ENSP00000278422 | ENSP00000356231 |
| ENSP00000278422 | ENSP00000361206 |
| ENSP00000278422 | ENSP00000370984 |
| ENSP00000278483 | ENSP00000305503 |

|                 |                 |
|-----------------|-----------------|
| ENSP00000278483 | ENSP00000350512 |
| ENSP00000278572 | ENSP00000280557 |
| ENSP00000278572 | ENSP00000283109 |
| ENSP00000278572 | ENSP00000286091 |
| ENSP00000278572 | ENSP00000287239 |
| ENSP00000278572 | ENSP00000287878 |
| ENSP00000278572 | ENSP00000288937 |
| ENSP00000278572 | ENSP00000289371 |
| ENSP00000278572 | ENSP00000295930 |
| ENSP00000278572 | ENSP00000296577 |
| ENSP00000278572 | ENSP00000296674 |
| ENSP00000278572 | ENSP00000296802 |
| ENSP00000278572 | ENSP00000296805 |
| ENSP00000278572 | ENSP00000297338 |
| ENSP00000278572 | ENSP00000297908 |
| ENSP00000278572 | ENSP00000298283 |
| ENSP00000278572 | ENSP00000300151 |
| ENSP00000278572 | ENSP00000301280 |
| ENSP00000278572 | ENSP00000301585 |
| ENSP00000278572 | ENSP00000302896 |
| ENSP00000278572 | ENSP00000305785 |
| ENSP00000278572 | ENSP00000306548 |
| ENSP00000278572 | ENSP00000306561 |
| ENSP00000278572 | ENSP00000307889 |
| ENSP00000278572 | ENSP00000308546 |
| ENSP00000278572 | ENSP00000308897 |
| ENSP00000278572 | ENSP00000309334 |
| ENSP00000278572 | ENSP00000311028 |
| ENSP00000278572 | ENSP00000311430 |
| ENSP00000278572 | ENSP00000312735 |
| ENSP00000278572 | ENSP00000314949 |
| ENSP00000278572 | ENSP00000315674 |
| ENSP00000278572 | ENSP00000317331 |
| ENSP00000278572 | ENSP00000317376 |
| ENSP00000278572 | ENSP00000318195 |
| ENSP00000278572 | ENSP00000318646 |
| ENSP00000278572 | ENSP00000319977 |
| ENSP00000278572 | ENSP00000321636 |
| ENSP00000278572 | ENSP00000323856 |
| ENSP00000278572 | ENSP00000326981 |
| ENSP00000278572 | ENSP00000328464 |
| ENSP00000278572 | ENSP00000331019 |
| ENSP00000278572 | ENSP00000336702 |
| ENSP00000278572 | ENSP00000337839 |
| ENSP00000278572 | ENSP00000339095 |
| ENSP00000278572 | ENSP00000339145 |

|                 |                 |
|-----------------|-----------------|
| ENSP00000278572 | ENSP00000339795 |
| ENSP00000278572 | ENSP00000340879 |
| ENSP00000278572 | ENSP00000341268 |
| ENSP00000278572 | ENSP00000341885 |
| ENSP00000278572 | ENSP00000342381 |
| ENSP00000278572 | ENSP00000344683 |
| ENSP00000278572 | ENSP00000345096 |
| ENSP00000278572 | ENSP00000345156 |
| ENSP00000278572 | ENSP00000346015 |
| ENSP00000278572 | ENSP00000346022 |
| ENSP00000278572 | ENSP00000346027 |
| ENSP00000278572 | ENSP00000346050 |
| ENSP00000278572 | ENSP00000346067 |
| ENSP00000278572 | ENSP00000346725 |
| ENSP00000278572 | ENSP00000347495 |
| ENSP00000278572 | ENSP00000354739 |
| ENSP00000278572 | ENSP00000354995 |
| ENSP00000278572 | ENSP00000355471 |
| ENSP00000278572 | ENSP00000356134 |
| ENSP00000278572 | ENSP00000356548 |
| ENSP00000278572 | ENSP00000356811 |
| ENSP00000278572 | ENSP00000358140 |
| ENSP00000278572 | ENSP00000359345 |
| ENSP00000278572 | ENSP00000361076 |
| ENSP00000278572 | ENSP00000361465 |
| ENSP00000278572 | ENSP00000362036 |
| ENSP00000278572 | ENSP00000362576 |
| ENSP00000278572 | ENSP00000362744 |
| ENSP00000278572 | ENSP00000363018 |
| ENSP00000278572 | ENSP00000363624 |
| ENSP00000278572 | ENSP00000363676 |
| ENSP00000278572 | ENSP00000363921 |
| ENSP00000278572 | ENSP00000364320 |
| ENSP00000278572 | ENSP00000364893 |
| ENSP00000278572 | ENSP00000365830 |
| ENSP00000278572 | ENSP00000365837 |
| ENSP00000278572 | ENSP00000367024 |
| ENSP00000278572 | ENSP00000368646 |
| ENSP00000278572 | ENSP00000368790 |
| ENSP00000278572 | ENSP00000368927 |
| ENSP00000278572 | ENSP00000369757 |
| ENSP00000278572 | ENSP00000371236 |
| ENSP00000278572 | ENSP00000372199 |
| ENSP00000278572 | ENSP00000373404 |
| ENSP00000278572 | ENSP00000375730 |
| ENSP00000278572 | ENSP00000376611 |

|                 |                 |
|-----------------|-----------------|
| ENSP00000278572 | ENSP00000379339 |
| ENSP00000278572 | ENSP00000379607 |
| ENSP00000278572 | ENSP00000379888 |
| ENSP00000278572 | ENSP00000385903 |
| ENSP00000278572 | ENSP00000389103 |
| ENSP00000278572 | ENSP00000392859 |
| ENSP00000278572 | ENSP00000393241 |
| ENSP00000278572 | ENSP00000401371 |
| ENSP00000278572 | ENSP00000403175 |
| ENSP00000278572 | ENSP00000412583 |
| ENSP00000278572 | ENSP00000414321 |
| ENSP00000278572 | ENSP00000416110 |
| ENSP00000278572 | ENSP00000416892 |
| ENSP00000278572 | ENSP00000417281 |
| ENSP00000278572 | ENSP00000417763 |
| ENSP00000278572 | ENSP00000420714 |
| ENSP00000278612 | ENSP00000305958 |
| ENSP00000278612 | ENSP00000318085 |
| ENSP00000278612 | ENSP00000347733 |
| ENSP00000278616 | ENSP00000279230 |
| ENSP00000278616 | ENSP00000280362 |
| ENSP00000278616 | ENSP00000280614 |
| ENSP00000278616 | ENSP00000283943 |
| ENSP00000278616 | ENSP00000285021 |
| ENSP00000278616 | ENSP00000287598 |
| ENSP00000278616 | ENSP00000287647 |
| ENSP00000278616 | ENSP00000290330 |
| ENSP00000278616 | ENSP00000294168 |
| ENSP00000278616 | ENSP00000295897 |
| ENSP00000278616 | ENSP00000295924 |
| ENSP00000278616 | ENSP00000296509 |
| ENSP00000278616 | ENSP00000296550 |
| ENSP00000278616 | ENSP00000297338 |
| ENSP00000278616 | ENSP00000298139 |
| ENSP00000278616 | ENSP00000298552 |
| ENSP00000278616 | ENSP00000299575 |
| ENSP00000278616 | ENSP00000300651 |
| ENSP00000278616 | ENSP00000300738 |
| ENSP00000278616 | ENSP00000301019 |
| ENSP00000278616 | ENSP00000301727 |
| ENSP00000278616 | ENSP00000301764 |
| ENSP00000278616 | ENSP00000302239 |
| ENSP00000278616 | ENSP00000302530 |
| ENSP00000278616 | ENSP00000302543 |
| ENSP00000278616 | ENSP00000307208 |
| ENSP00000278616 | ENSP00000307684 |

|                 |                 |
|-----------------|-----------------|
| ENSP00000278616 | ENSP00000309572 |
| ENSP00000278616 | ENSP00000310842 |
| ENSP00000278616 | ENSP00000311344 |
| ENSP00000278616 | ENSP00000311873 |
| ENSP00000278616 | ENSP00000313420 |
| ENSP00000278616 | ENSP00000323050 |
| ENSP00000278616 | ENSP00000323099 |
| ENSP00000278616 | ENSP00000323439 |
| ENSP00000278616 | ENSP00000325677 |
| ENSP00000278616 | ENSP00000325863 |
| ENSP00000278616 | ENSP00000329466 |
| ENSP00000278616 | ENSP00000330408 |
| ENSP00000278616 | ENSP00000334474 |
| ENSP00000278616 | ENSP00000336842 |
| ENSP00000278616 | ENSP00000336868 |
| ENSP00000278616 | ENSP00000337127 |
| ENSP00000278616 | ENSP00000337353 |
| ENSP00000278616 | ENSP00000339299 |
| ENSP00000278616 | ENSP00000339527 |
| ENSP00000278616 | ENSP00000340766 |
| ENSP00000278616 | ENSP00000340879 |
| ENSP00000278616 | ENSP00000342889 |
| ENSP00000278616 | ENSP00000343741 |
| ENSP00000278616 | ENSP00000344537 |
| ENSP00000278616 | ENSP00000344741 |
| ENSP00000278616 | ENSP00000345988 |
| ENSP00000278616 | ENSP00000346566 |
| ENSP00000278616 | ENSP00000347168 |
| ENSP00000278616 | ENSP00000347232 |
| ENSP00000278616 | ENSP00000348069 |
| ENSP00000278616 | ENSP00000348573 |
| ENSP00000278616 | ENSP00000348784 |
| ENSP00000278616 | ENSP00000349205 |
| ENSP00000278616 | ENSP00000349213 |
| ENSP00000278616 | ENSP00000349393 |
| ENSP00000278616 | ENSP00000350199 |
| ENSP00000278616 | ENSP00000350283 |
| ENSP00000278616 | ENSP00000350491 |
| ENSP00000278616 | ENSP00000350767 |
| ENSP00000278616 | ENSP00000350785 |
| ENSP00000278616 | ENSP00000351284 |
| ENSP00000278616 | ENSP00000351947 |
| ENSP00000278616 | ENSP00000352257 |
| ENSP00000278616 | ENSP00000352572 |
| ENSP00000278616 | ENSP00000353622 |
| ENSP00000278616 | ENSP00000353793 |

|                 |                 |
|-----------------|-----------------|
| ENSP00000278616 | ENSP00000353971 |
| ENSP00000278616 | ENSP00000354522 |
| ENSP00000278616 | ENSP00000354720 |
| ENSP00000278616 | ENSP00000354927 |
| ENSP00000278616 | ENSP00000355185 |
| ENSP00000278616 | ENSP00000355261 |
| ENSP00000278616 | ENSP00000355759 |
| ENSP00000278616 | ENSP00000355922 |
| ENSP00000278616 | ENSP00000356562 |
| ENSP00000278616 | ENSP00000358335 |
| ENSP00000278616 | ENSP00000358423 |
| ENSP00000278616 | ENSP00000360310 |
| ENSP00000278616 | ENSP00000362135 |
| ENSP00000278616 | ENSP00000362166 |
| ENSP00000278616 | ENSP00000362546 |
| ENSP00000278616 | ENSP00000362578 |
| ENSP00000278616 | ENSP00000363021 |
| ENSP00000278616 | ENSP00000364270 |
| ENSP00000278616 | ENSP00000364893 |
| ENSP00000278616 | ENSP00000365588 |
| ENSP00000278616 | ENSP00000365891 |
| ENSP00000278616 | ENSP00000366565 |
| ENSP00000278616 | ENSP00000366974 |
| ENSP00000278616 | ENSP00000367034 |
| ENSP00000278616 | ENSP00000367527 |
| ENSP00000278616 | ENSP00000368305 |
| ENSP00000278616 | ENSP00000368438 |
| ENSP00000278616 | ENSP00000369038 |
| ENSP00000278616 | ENSP00000369335 |
| ENSP00000278616 | ENSP00000369411 |
| ENSP00000278616 | ENSP00000369497 |
| ENSP00000278616 | ENSP00000370151 |
| ENSP00000278616 | ENSP00000371475 |
| ENSP00000278616 | ENSP00000372023 |
| ENSP00000278616 | ENSP00000373060 |
| ENSP00000278616 | ENSP00000373474 |
| ENSP00000278616 | ENSP00000375863 |
| ENSP00000278616 | ENSP00000377384 |
| ENSP00000278616 | ENSP00000380504 |
| ENSP00000278616 | ENSP00000381577 |
| ENSP00000278616 | ENSP00000382423 |
| ENSP00000278616 | ENSP00000384048 |
| ENSP00000278616 | ENSP00000407401 |
| ENSP00000278616 | ENSP00000409167 |
| ENSP00000278616 | ENSP00000417281 |
| ENSP00000278618 | ENSP00000294008 |

|                 |                 |
|-----------------|-----------------|
| ENSP00000278618 | ENSP00000296490 |
| ENSP00000278618 | ENSP00000304592 |
| ENSP00000278618 | ENSP00000346874 |
| ENSP00000278618 | ENSP00000352408 |
| ENSP00000278618 | ENSP00000355384 |
| ENSP00000278618 | ENSP00000360286 |
| ENSP00000278671 | ENSP00000357288 |
| ENSP00000278671 | ENSP00000358423 |
| ENSP00000278715 | ENSP00000314949 |
| ENSP00000278715 | ENSP00000357775 |
| ENSP00000278715 | ENSP00000386284 |
| ENSP00000278742 | ENSP00000296129 |
| ENSP00000278742 | ENSP00000342098 |
| ENSP00000278780 | ENSP00000295373 |
| ENSP00000278780 | ENSP00000344456 |
| ENSP00000278780 | ENSP00000356520 |
| ENSP00000278780 | ENSP00000358404 |
| ENSP00000278780 | ENSP00000392601 |
| ENSP00000278856 | ENSP00000296802 |
| ENSP00000278856 | ENSP00000302886 |
| ENSP00000278856 | ENSP00000305702 |
| ENSP00000278856 | ENSP00000311430 |
| ENSP00000278856 | ENSP00000314348 |
| ENSP00000278856 | ENSP00000317992 |
| ENSP00000278856 | ENSP00000323858 |
| ENSP00000278856 | ENSP00000328690 |
| ENSP00000278856 | ENSP00000338573 |
| ENSP00000278856 | ENSP00000338862 |
| ENSP00000278856 | ENSP00000339145 |
| ENSP00000278856 | ENSP00000339795 |
| ENSP00000278856 | ENSP00000346725 |
| ENSP00000278856 | ENSP00000349393 |
| ENSP00000278856 | ENSP00000352021 |
| ENSP00000278856 | ENSP00000353246 |
| ENSP00000278856 | ENSP00000354040 |
| ENSP00000278856 | ENSP00000355899 |
| ENSP00000278856 | ENSP00000356476 |
| ENSP00000278856 | ENSP00000359345 |
| ENSP00000278856 | ENSP00000359688 |
| ENSP00000278856 | ENSP00000360412 |
| ENSP00000278856 | ENSP00000360828 |
| ENSP00000278856 | ENSP00000361076 |
| ENSP00000278856 | ENSP00000361092 |
| ENSP00000278856 | ENSP00000362344 |
| ENSP00000278856 | ENSP00000363559 |
| ENSP00000278856 | ENSP00000364320 |

|                 |                 |
|-----------------|-----------------|
| ENSP00000278856 | ENSP00000366519 |
| ENSP00000278856 | ENSP00000368887 |
| ENSP00000278856 | ENSP00000377640 |
| ENSP00000278856 | ENSP00000377865 |
| ENSP00000278856 | ENSP00000380982 |
| ENSP00000278856 | ENSP00000382392 |
| ENSP00000278856 | ENSP00000389103 |
| ENSP00000278856 | ENSP00000402338 |
| ENSP00000278856 | ENSP00000406490 |
| ENSP00000278865 | ENSP00000335357 |
| ENSP00000278886 | ENSP00000300087 |
| ENSP00000278886 | ENSP00000300417 |
| ENSP00000278886 | ENSP00000300850 |
| ENSP00000278886 | ENSP00000303315 |
| ENSP00000278886 | ENSP00000309189 |
| ENSP00000278886 | ENSP00000314004 |
| ENSP00000278886 | ENSP00000318821 |
| ENSP00000278886 | ENSP00000324444 |
| ENSP00000278886 | ENSP00000324827 |
| ENSP00000278886 | ENSP00000347538 |
| ENSP00000278886 | ENSP00000354270 |
| ENSP00000278886 | ENSP00000355944 |
| ENSP00000278886 | ENSP00000358605 |
| ENSP00000278886 | ENSP00000364126 |
| ENSP00000278886 | ENSP00000368017 |
| ENSP00000278886 | ENSP00000377944 |
| ENSP00000278886 | ENSP00000378529 |
| ENSP00000278886 | ENSP00000381031 |
| ENSP00000278886 | ENSP00000381795 |
| ENSP00000278886 | ENSP00000382562 |
| ENSP00000278886 | ENSP00000395574 |
| ENSP00000278888 | ENSP00000340944 |
| ENSP00000278888 | ENSP00000364898 |
| ENSP00000278919 | ENSP00000297440 |
| ENSP00000278919 | ENSP00000307850 |
| ENSP00000278919 | ENSP00000315693 |
| ENSP00000278919 | ENSP00000333873 |
| ENSP00000278919 | ENSP00000341170 |
| ENSP00000278919 | ENSP00000343479 |
| ENSP00000278919 | ENSP00000345262 |
| ENSP00000278919 | ENSP00000347184 |
| ENSP00000278919 | ENSP00000351832 |
| ENSP00000278919 | ENSP00000354720 |
| ENSP00000278919 | ENSP00000355022 |
| ENSP00000278919 | ENSP00000355596 |
| ENSP00000278919 | ENSP00000358778 |



|                 |                 |
|-----------------|-----------------|
| ENSP00000278919 | ENSP00000365962 |
| ENSP00000278919 | ENSP00000375082 |
| ENSP00000278919 | ENSP00000377969 |
| ENSP00000278919 | ENSP00000387262 |
| ENSP00000278919 | ENSP00000408020 |
| ENSP00000278935 | ENSP00000323099 |
| ENSP00000278935 | ENSP00000343741 |
| ENSP00000278937 | ENSP00000336790 |
| ENSP00000278937 | ENSP00000341637 |
| ENSP00000278980 | ENSP00000308236 |
| ENSP00000279036 | ENSP00000309430 |
| ENSP00000279036 | ENSP00000337478 |
| ENSP00000279036 | ENSP00000347206 |
| ENSP00000279036 | ENSP00000355601 |
| ENSP00000279036 | ENSP00000359848 |
| ENSP00000279036 | ENSP00000404247 |
| ENSP00000279147 | ENSP00000296577 |
| ENSP00000279147 | ENSP00000395777 |
| ENSP00000279230 | ENSP00000282884 |
| ENSP00000279230 | ENSP00000295065 |
| ENSP00000279230 | ENSP00000320340 |
| ENSP00000279230 | ENSP00000322218 |
| ENSP00000279230 | ENSP00000339381 |
| ENSP00000279230 | ENSP00000344668 |
| ENSP00000279230 | ENSP00000347978 |
| ENSP00000279230 | ENSP00000352121 |
| ENSP00000279230 | ENSP00000354558 |
| ENSP00000279230 | ENSP00000360141 |
| ENSP00000279230 | ENSP00000361141 |
| ENSP00000279230 | ENSP00000363921 |
| ENSP00000279230 | ENSP00000368349 |
| ENSP00000279230 | ENSP00000370410 |
| ENSP00000279230 | ENSP00000373399 |
| ENSP00000279242 | ENSP00000288937 |
| ENSP00000279242 | ENSP00000300151 |
| ENSP00000279242 | ENSP00000301585 |
| ENSP00000279242 | ENSP00000306548 |
| ENSP00000279242 | ENSP00000308275 |
| ENSP00000279242 | ENSP00000312311 |
| ENSP00000279242 | ENSP00000315017 |
| ENSP00000279242 | ENSP00000333401 |
| ENSP00000279242 | ENSP00000354125 |
| ENSP00000279242 | ENSP00000357048 |
| ENSP00000279242 | ENSP00000370930 |
| ENSP00000279242 | ENSP00000377486 |
| ENSP00000279242 | ENSP00000379607 |

|                 |                 |
|-----------------|-----------------|
| ENSP00000279242 | ENSP00000417602 |
| ENSP00000279281 | ENSP00000339245 |
| ENSP00000279281 | ENSP00000353332 |
| ENSP00000279281 | ENSP00000360532 |
| ENSP00000279392 | ENSP00000311505 |
| ENSP00000279804 | ENSP00000338799 |
| ENSP00000279873 | ENSP00000303315 |
| ENSP00000279873 | ENSP00000307684 |
| ENSP00000279873 | ENSP00000310649 |
| ENSP00000279873 | ENSP00000323720 |
| ENSP00000280057 | ENSP00000360464 |
| ENSP00000280057 | ENSP00000366829 |
| ENSP00000280082 | ENSP00000313829 |
| ENSP00000280083 | ENSP00000295897 |
| ENSP00000280083 | ENSP00000303315 |
| ENSP00000280097 | ENSP00000350249 |
| ENSP00000280098 | ENSP00000296783 |
| ENSP00000280098 | ENSP00000309175 |
| ENSP00000280098 | ENSP00000313691 |
| ENSP00000280098 | ENSP00000336856 |
| ENSP00000280098 | ENSP00000354586 |
| ENSP00000280098 | ENSP00000370408 |
| ENSP00000280098 | ENSP00000370421 |
| ENSP00000280098 | ENSP00000384109 |
| ENSP00000280154 | ENSP00000316879 |
| ENSP00000280154 | ENSP00000340281 |
| ENSP00000280154 | ENSP00000346037 |
| ENSP00000280154 | ENSP00000359206 |
| ENSP00000280154 | ENSP00000359345 |
| ENSP00000280154 | ENSP00000379607 |
| ENSP00000280187 | ENSP00000315693 |
| ENSP00000280190 | ENSP00000283195 |
| ENSP00000280190 | ENSP00000290158 |
| ENSP00000280190 | ENSP00000293777 |
| ENSP00000280190 | ENSP00000296755 |
| ENSP00000280190 | ENSP00000297338 |
| ENSP00000280190 | ENSP00000300231 |
| ENSP00000280190 | ENSP00000304593 |
| ENSP00000280190 | ENSP00000308699 |
| ENSP00000280190 | ENSP00000315791 |
| ENSP00000280190 | ENSP00000323302 |
| ENSP00000280190 | ENSP00000323720 |
| ENSP00000280190 | ENSP00000326128 |
| ENSP00000280190 | ENSP00000334188 |
| ENSP00000280190 | ENSP00000336842 |
| ENSP00000280190 | ENSP00000356405 |

|                 |                 |
|-----------------|-----------------|
| ENSP00000280190 | ENSP00000356989 |
| ENSP00000280190 | ENSP00000357887 |
| ENSP00000280190 | ENSP00000360076 |
| ENSP00000280190 | ENSP00000362948 |
| ENSP00000280190 | ENSP00000363313 |
| ENSP00000280190 | ENSP00000363734 |
| ENSP00000280190 | ENSP00000372694 |
| ENSP00000280190 | ENSP00000374213 |
| ENSP00000280190 | ENSP00000386759 |
| ENSP00000280190 | ENSP00000391774 |
| ENSP00000280190 | ENSP00000412319 |
| ENSP00000280190 | ENSP00000415678 |
| ENSP00000280191 | ENSP00000352708 |
| ENSP00000280236 | ENSP00000351327 |
| ENSP00000280346 | ENSP00000282077 |
| ENSP00000280346 | ENSP00000284320 |
| ENSP00000280346 | ENSP00000295119 |
| ENSP00000280346 | ENSP00000299601 |
| ENSP00000280346 | ENSP00000300107 |
| ENSP00000280346 | ENSP00000304370 |
| ENSP00000280346 | ENSP00000308610 |
| ENSP00000280346 | ENSP00000315693 |
| ENSP00000280346 | ENSP00000327070 |
| ENSP00000280346 | ENSP00000329466 |
| ENSP00000280346 | ENSP00000334148 |
| ENSP00000280346 | ENSP00000335304 |
| ENSP00000280346 | ENSP00000342056 |
| ENSP00000280346 | ENSP00000345282 |
| ENSP00000280346 | ENSP00000367637 |
| ENSP00000280346 | ENSP00000367923 |
| ENSP00000280346 | ENSP00000370377 |
| ENSP00000280346 | ENSP00000379500 |
| ENSP00000280346 | ENSP00000379607 |
| ENSP00000280346 | ENSP00000387262 |
| ENSP00000280346 | ENSP00000388872 |
| ENSP00000280346 | ENSP00000389934 |
| ENSP00000280346 | ENSP00000394382 |
| ENSP00000280346 | ENSP00000417190 |
| ENSP00000280350 | ENSP00000323275 |
| ENSP00000280350 | ENSP00000323424 |
| ENSP00000280350 | ENSP00000324122 |
| ENSP00000280350 | ENSP00000333018 |
| ENSP00000280350 | ENSP00000350011 |
| ENSP00000280350 | ENSP00000355621 |
| ENSP00000280350 | ENSP00000357220 |
| ENSP00000280350 | ENSP00000360497 |

|                 |                 |
|-----------------|-----------------|
| ENSP00000280350 | ENSP00000360876 |
| ENSP00000280350 | ENSP00000361010 |
| ENSP00000280350 | ENSP00000362386 |
| ENSP00000280350 | ENSP00000364298 |
| ENSP00000280350 | ENSP00000366135 |
| ENSP00000280350 | ENSP00000397530 |
| ENSP00000280350 | ENSP00000398812 |
| ENSP00000280350 | ENSP00000412439 |
| ENSP00000280357 | ENSP00000367408 |
| ENSP00000280362 | ENSP00000281171 |
| ENSP00000280362 | ENSP00000283228 |
| ENSP00000280362 | ENSP00000292476 |
| ENSP00000280362 | ENSP00000303554 |
| ENSP00000280362 | ENSP00000313420 |
| ENSP00000280362 | ENSP00000315931 |
| ENSP00000280362 | ENSP00000340944 |
| ENSP00000280362 | ENSP00000343741 |
| ENSP00000280362 | ENSP00000348395 |
| ENSP00000280362 | ENSP00000349213 |
| ENSP00000280362 | ENSP00000349932 |
| ENSP00000280362 | ENSP00000355923 |
| ENSP00000280362 | ENSP00000356346 |
| ENSP00000280362 | ENSP00000362306 |
| ENSP00000280362 | ENSP00000368646 |
| ENSP00000280362 | ENSP00000374069 |
| ENSP00000280362 | ENSP00000377047 |
| ENSP00000280362 | ENSP00000379933 |
| ENSP00000280362 | ENSP00000380336 |
| ENSP00000280362 | ENSP00000394794 |
| ENSP00000280527 | ENSP00000283147 |
| ENSP00000280527 | ENSP00000340896 |
| ENSP00000280527 | ENSP00000345395 |
| ENSP00000280527 | ENSP00000350215 |
| ENSP00000280527 | ENSP00000355580 |
| ENSP00000280527 | ENSP00000357484 |
| ENSP00000280527 | ENSP00000362778 |
| ENSP00000280527 | ENSP00000382323 |
| ENSP00000280557 | ENSP00000283875 |
| ENSP00000280557 | ENSP00000288937 |
| ENSP00000280557 | ENSP00000296577 |
| ENSP00000280557 | ENSP00000296674 |
| ENSP00000280557 | ENSP00000296802 |
| ENSP00000280557 | ENSP00000301364 |
| ENSP00000280557 | ENSP00000302896 |
| ENSP00000280557 | ENSP00000310129 |
| ENSP00000280557 | ENSP00000311028 |

|                 |                 |
|-----------------|-----------------|
| ENSP00000280557 | ENSP00000316879 |
| ENSP00000280557 | ENSP00000317376 |
| ENSP00000280557 | ENSP00000318646 |
| ENSP00000280557 | ENSP00000323856 |
| ENSP00000280557 | ENSP00000326981 |
| ENSP00000280557 | ENSP00000331019 |
| ENSP00000280557 | ENSP00000336702 |
| ENSP00000280557 | ENSP00000339095 |
| ENSP00000280557 | ENSP00000340281 |
| ENSP00000280557 | ENSP00000341885 |
| ENSP00000280557 | ENSP00000346050 |
| ENSP00000280557 | ENSP00000346067 |
| ENSP00000280557 | ENSP00000351813 |
| ENSP00000280557 | ENSP00000354125 |
| ENSP00000280557 | ENSP00000358140 |
| ENSP00000280557 | ENSP00000361686 |
| ENSP00000280557 | ENSP00000362744 |
| ENSP00000280557 | ENSP00000363308 |
| ENSP00000280557 | ENSP00000364119 |
| ENSP00000280557 | ENSP00000364320 |
| ENSP00000280557 | ENSP00000368927 |
| ENSP00000280557 | ENSP00000369757 |
| ENSP00000280557 | ENSP00000370258 |
| ENSP00000280557 | ENSP00000379339 |
| ENSP00000280557 | ENSP00000379888 |
| ENSP00000280557 | ENSP00000393241 |
| ENSP00000280557 | ENSP00000396937 |
| ENSP00000280557 | ENSP00000403175 |
| ENSP00000280557 | ENSP00000412583 |
| ENSP00000280557 | ENSP00000414321 |
| ENSP00000280557 | ENSP00000416110 |
| ENSP00000280557 | ENSP00000417229 |
| ENSP00000280557 | ENSP00000420714 |
| ENSP00000280605 | ENSP00000301729 |
| ENSP00000280605 | ENSP00000305958 |
| ENSP00000280605 | ENSP00000321259 |
| ENSP00000280605 | ENSP00000336752 |
| ENSP00000280605 | ENSP00000348395 |
| ENSP00000280605 | ENSP00000366620 |
| ENSP00000280605 | ENSP00000368438 |
| ENSP00000280614 | ENSP00000296328 |
| ENSP00000280614 | ENSP00000296509 |
| ENSP00000280614 | ENSP00000310596 |
| ENSP00000280614 | ENSP00000313171 |
| ENSP00000280614 | ENSP00000314949 |
| ENSP00000280614 | ENSP00000319104 |

|                 |                 |
|-----------------|-----------------|
| ENSP00000280614 | ENSP00000341743 |
| ENSP00000280614 | ENSP00000343741 |
| ENSP00000280614 | ENSP00000351284 |
| ENSP00000280614 | ENSP00000354673 |
| ENSP00000280614 | ENSP00000354850 |
| ENSP00000280614 | ENSP00000356405 |
| ENSP00000280614 | ENSP00000360515 |
| ENSP00000280614 | ENSP00000368438 |
| ENSP00000280614 | ENSP00000369965 |
| ENSP00000280614 | ENSP00000372023 |
| ENSP00000280665 | ENSP00000285896 |
| ENSP00000280665 | ENSP00000298832 |
| ENSP00000280665 | ENSP00000300146 |
| ENSP00000280665 | ENSP00000300413 |
| ENSP00000280665 | ENSP00000302160 |
| ENSP00000280665 | ENSP00000310596 |
| ENSP00000280665 | ENSP00000318195 |
| ENSP00000280665 | ENSP00000319341 |
| ENSP00000280665 | ENSP00000320503 |
| ENSP00000280665 | ENSP00000322419 |
| ENSP00000280665 | ENSP00000340766 |
| ENSP00000280665 | ENSP00000341551 |
| ENSP00000280665 | ENSP00000341848 |
| ENSP00000280665 | ENSP00000344989 |
| ENSP00000280665 | ENSP00000346015 |
| ENSP00000280665 | ENSP00000348573 |
| ENSP00000280665 | ENSP00000348708 |
| ENSP00000280665 | ENSP00000351596 |
| ENSP00000280665 | ENSP00000351811 |
| ENSP00000280665 | ENSP00000352572 |
| ENSP00000280665 | ENSP00000354486 |
| ENSP00000280665 | ENSP00000355261 |
| ENSP00000280665 | ENSP00000355922 |
| ENSP00000280665 | ENSP00000356811 |
| ENSP00000280665 | ENSP00000359939 |
| ENSP00000280665 | ENSP00000361949 |
| ENSP00000280665 | ENSP00000364813 |
| ENSP00000280665 | ENSP00000366843 |
| ENSP00000280665 | ENSP00000368591 |
| ENSP00000280665 | ENSP00000372883 |
| ENSP00000280665 | ENSP00000373272 |
| ENSP00000280665 | ENSP00000373715 |
| ENSP00000280665 | ENSP00000379144 |
| ENSP00000280665 | ENSP00000382595 |
| ENSP00000280665 | ENSP00000394400 |
| ENSP00000280665 | ENSP00000398597 |

|                 |                 |
|-----------------|-----------------|
| ENSP00000280665 | ENSP00000403345 |
| ENSP00000280665 | ENSP00000406280 |
| ENSP00000280665 | ENSP00000410758 |
| ENSP00000280665 | ENSP00000414006 |
| ENSP00000280665 | ENSP00000414634 |
| ENSP00000280700 | ENSP00000283290 |
| ENSP00000280700 | ENSP00000290649 |
| ENSP00000280700 | ENSP00000290663 |
| ENSP00000280700 | ENSP00000290810 |
| ENSP00000280700 | ENSP00000294119 |
| ENSP00000280700 | ENSP00000298852 |
| ENSP00000280700 | ENSP00000305465 |
| ENSP00000280700 | ENSP00000324560 |
| ENSP00000280700 | ENSP00000333950 |
| ENSP00000280700 | ENSP00000334044 |
| ENSP00000280700 | ENSP00000339484 |
| ENSP00000280700 | ENSP00000340836 |
| ENSP00000280700 | ENSP00000346437 |
| ENSP00000280700 | ENSP00000348565 |
| ENSP00000280700 | ENSP00000349785 |
| ENSP00000280700 | ENSP00000350708 |
| ENSP00000280700 | ENSP00000354340 |
| ENSP00000280700 | ENSP00000359067 |
| ENSP00000280700 | ENSP00000366249 |
| ENSP00000280700 | ENSP00000366395 |
| ENSP00000280700 | ENSP00000368699 |
| ENSP00000280700 | ENSP00000373039 |
| ENSP00000280700 | ENSP00000379457 |
| ENSP00000280700 | ENSP00000396152 |
| ENSP00000280700 | ENSP00000400312 |
| ENSP00000280700 | ENSP00000410416 |
| ENSP00000280701 | ENSP00000287675 |
| ENSP00000280701 | ENSP00000290429 |
| ENSP00000280701 | ENSP00000292475 |
| ENSP00000280701 | ENSP00000300107 |
| ENSP00000280701 | ENSP00000301587 |
| ENSP00000280701 | ENSP00000304102 |
| ENSP00000280701 | ENSP00000305682 |
| ENSP00000280701 | ENSP00000310040 |
| ENSP00000280701 | ENSP00000337445 |
| ENSP00000280701 | ENSP00000350512 |
| ENSP00000280701 | ENSP00000358737 |
| ENSP00000280701 | ENSP00000360992 |
| ENSP00000280701 | ENSP00000365773 |
| ENSP00000280701 | ENSP00000370414 |
| ENSP00000280701 | ENSP00000389649 |

|                 |                 |
|-----------------|-----------------|
| ENSP00000280701 | ENSP00000404923 |
| ENSP00000280772 | ENSP00000301838 |
| ENSP00000280772 | ENSP00000317790 |
| ENSP00000280772 | ENSP00000328968 |
| ENSP00000280772 | ENSP00000347979 |
| ENSP00000280772 | ENSP00000354560 |
| ENSP00000280772 | ENSP00000360252 |
| ENSP00000280772 | ENSP00000361824 |
| ENSP00000280772 | ENSP00000396915 |
| ENSP00000280800 | ENSP00000333298 |
| ENSP00000280800 | ENSP00000379607 |
| ENSP00000280871 | ENSP00000368119 |
| ENSP00000280979 | ENSP00000300574 |
| ENSP00000280979 | ENSP00000341680 |
| ENSP00000280979 | ENSP00000360532 |
| ENSP00000280979 | ENSP00000378306 |
| ENSP00000281043 | ENSP00000281708 |
| ENSP00000281043 | ENSP00000298552 |
| ENSP00000281043 | ENSP00000309555 |
| ENSP00000281043 | ENSP00000329357 |
| ENSP00000281043 | ENSP00000351490 |
| ENSP00000281043 | ENSP00000354558 |
| ENSP00000281043 | ENSP00000355153 |
| ENSP00000281043 | ENSP00000364524 |
| ENSP00000281043 | ENSP00000365735 |
| ENSP00000281043 | ENSP00000381499 |
| ENSP00000281043 | ENSP00000392028 |
| ENSP00000281092 | ENSP00000297689 |
| ENSP00000281092 | ENSP00000301843 |
| ENSP00000281092 | ENSP00000316460 |
| ENSP00000281092 | ENSP00000341208 |
| ENSP00000281092 | ENSP00000344456 |
| ENSP00000281092 | ENSP00000381293 |
| ENSP00000281092 | ENSP00000381567 |
| ENSP00000281141 | ENSP00000295951 |
| ENSP00000281141 | ENSP00000326981 |
| ENSP00000281141 | ENSP00000362578 |
| ENSP00000281141 | ENSP00000362688 |
| ENSP00000281141 | ENSP00000364119 |
| ENSP00000281141 | ENSP00000379933 |
| ENSP00000281142 | ENSP00000361027 |
| ENSP00000281171 | ENSP00000335306 |
| ENSP00000281171 | ENSP00000344220 |
| ENSP00000281171 | ENSP00000344456 |
| ENSP00000281171 | ENSP00000362608 |
| ENSP00000281171 | ENSP00000365891 |



|                 |                 |
|-----------------|-----------------|
| ENSP00000281171 | ENSP00000381293 |
| ENSP00000281172 | ENSP00000296218 |
| ENSP00000281172 | ENSP00000305790 |
| ENSP00000281172 | ENSP00000327077 |
| ENSP00000281172 | ENSP00000341082 |
| ENSP00000281172 | ENSP00000352047 |
| ENSP00000281172 | ENSP00000352257 |
| ENSP00000281172 | ENSP00000354566 |
| ENSP00000281172 | ENSP00000355296 |
| ENSP00000281172 | ENSP00000358770 |
| ENSP00000281172 | ENSP00000359837 |
| ENSP00000281172 | ENSP00000366936 |
| ENSP00000281172 | ENSP00000367408 |
| ENSP00000281172 | ENSP00000367440 |
| ENSP00000281172 | ENSP00000384675 |
| ENSP00000281187 | ENSP00000284957 |
| ENSP00000281187 | ENSP00000286835 |
| ENSP00000281187 | ENSP00000295767 |
| ENSP00000281187 | ENSP00000299138 |
| ENSP00000281187 | ENSP00000304292 |
| ENSP00000281187 | ENSP00000308496 |
| ENSP00000281187 | ENSP00000317332 |
| ENSP00000281187 | ENSP00000340836 |
| ENSP00000281187 | ENSP00000352175 |
| ENSP00000281187 | ENSP00000354522 |
| ENSP00000281187 | ENSP00000356146 |
| ENSP00000281187 | ENSP00000358715 |
| ENSP00000281187 | ENSP00000360183 |
| ENSP00000281187 | ENSP00000363349 |
| ENSP00000281187 | ENSP00000377665 |
| ENSP00000281187 | ENSP00000397441 |
| ENSP00000281187 | ENSP00000402935 |
| ENSP00000281243 | ENSP00000311505 |
| ENSP00000281273 | ENSP00000295897 |
| ENSP00000281273 | ENSP00000339532 |
| ENSP00000281273 | ENSP00000369871 |
| ENSP00000281282 | ENSP00000292535 |
| ENSP00000281282 | ENSP00000294543 |
| ENSP00000281282 | ENSP00000313059 |
| ENSP00000281282 | ENSP00000318884 |
| ENSP00000281282 | ENSP00000322608 |
| ENSP00000281282 | ENSP00000333950 |
| ENSP00000281282 | ENSP00000360076 |
| ENSP00000281282 | ENSP00000369871 |
| ENSP00000281282 | ENSP00000376410 |
| ENSP00000281282 | ENSP00000391249 |

|                 |                 |
|-----------------|-----------------|
| ENSP00000281282 | ENSP00000397351 |
| ENSP00000281282 | ENSP00000397598 |
| ENSP00000281282 | ENSP00000407487 |
| ENSP00000281382 | ENSP00000326869 |
| ENSP00000281382 | ENSP00000415203 |
| ENSP00000281437 | ENSP00000303315 |
| ENSP00000281437 | ENSP00000306245 |
| ENSP00000281437 | ENSP00000350359 |
| ENSP00000281537 | ENSP00000299106 |
| ENSP00000281537 | ENSP00000301843 |
| ENSP00000281537 | ENSP00000304604 |
| ENSP00000281537 | ENSP00000313829 |
| ENSP00000281537 | ENSP00000323856 |
| ENSP00000281537 | ENSP00000329466 |
| ENSP00000281537 | ENSP00000346550 |
| ENSP00000281537 | ENSP00000347379 |
| ENSP00000281537 | ENSP00000355923 |
| ENSP00000281537 | ENSP00000360286 |
| ENSP00000281537 | ENSP00000361824 |
| ENSP00000281537 | ENSP00000367972 |
| ENSP00000281537 | ENSP00000368797 |
| ENSP00000281537 | ENSP00000368824 |
| ENSP00000281537 | ENSP00000370410 |
| ENSP00000281537 | ENSP00000383623 |
| ENSP00000281543 | ENSP00000295890 |
| ENSP00000281543 | ENSP00000296674 |
| ENSP00000281543 | ENSP00000308897 |
| ENSP00000281543 | ENSP00000310520 |
| ENSP00000281543 | ENSP00000318977 |
| ENSP00000281543 | ENSP00000354673 |
| ENSP00000281543 | ENSP00000354739 |
| ENSP00000281623 | ENSP00000311280 |
| ENSP00000281708 | ENSP00000290810 |
| ENSP00000281708 | ENSP00000296930 |
| ENSP00000281708 | ENSP00000303315 |
| ENSP00000281708 | ENSP00000306788 |
| ENSP00000281708 | ENSP00000310129 |
| ENSP00000281708 | ENSP00000310701 |
| ENSP00000281708 | ENSP00000312411 |
| ENSP00000281708 | ENSP00000320648 |
| ENSP00000281708 | ENSP00000320768 |
| ENSP00000281708 | ENSP00000326366 |
| ENSP00000281708 | ENSP00000337501 |
| ENSP00000281708 | ENSP00000339529 |
| ENSP00000281708 | ENSP00000347451 |
| ENSP00000281708 | ENSP00000348069 |

|                 |                 |
|-----------------|-----------------|
| ENSP00000281708 | ENSP00000348554 |
| ENSP00000281708 | ENSP00000350512 |
| ENSP00000281708 | ENSP00000353793 |
| ENSP00000281708 | ENSP00000354558 |
| ENSP00000281708 | ENSP00000355865 |
| ENSP00000281708 | ENSP00000358022 |
| ENSP00000281708 | ENSP00000358140 |
| ENSP00000281708 | ENSP00000362413 |
| ENSP00000281708 | ENSP00000366915 |
| ENSP00000281708 | ENSP00000367208 |
| ENSP00000281708 | ENSP00000367527 |
| ENSP00000281708 | ENSP00000368805 |
| ENSP00000281708 | ENSP00000369757 |
| ENSP00000281708 | ENSP00000370151 |
| ENSP00000281708 | ENSP00000378350 |
| ENSP00000281708 | ENSP00000378529 |
| ENSP00000281708 | ENSP00000384109 |
| ENSP00000281708 | ENSP00000417281 |
| ENSP00000281708 | ENSP00000417748 |
| ENSP00000281828 | ENSP00000282276 |
| ENSP00000281828 | ENSP00000289371 |
| ENSP00000281828 | ENSP00000294008 |
| ENSP00000281828 | ENSP00000302114 |
| ENSP00000281828 | ENSP00000303279 |
| ENSP00000281828 | ENSP00000311766 |
| ENSP00000281828 | ENSP00000317334 |
| ENSP00000281828 | ENSP00000320309 |
| ENSP00000281828 | ENSP00000340019 |
| ENSP00000281828 | ENSP00000340093 |
| ENSP00000281828 | ENSP00000348565 |
| ENSP00000281828 | ENSP00000348886 |
| ENSP00000281828 | ENSP00000351380 |
| ENSP00000281828 | ENSP00000352928 |
| ENSP00000281828 | ENSP00000364794 |
| ENSP00000281828 | ENSP00000366395 |
| ENSP00000281828 | ENSP00000368140 |
| ENSP00000281828 | ENSP00000370083 |
| ENSP00000281828 | ENSP00000370119 |
| ENSP00000281828 | ENSP00000370377 |
| ENSP00000281828 | ENSP00000370607 |
| ENSP00000281828 | ENSP00000376946 |
| ENSP00000281834 | ENSP00000368538 |
| ENSP00000281928 | ENSP00000286317 |
| ENSP00000281928 | ENSP00000290663 |
| ENSP00000281928 | ENSP00000293777 |
| ENSP00000281928 | ENSP00000302327 |

|                 |                 |
|-----------------|-----------------|
| ENSP00000281928 | ENSP00000323720 |
| ENSP00000281928 | ENSP00000325612 |
| ENSP00000281928 | ENSP00000326767 |
| ENSP00000281928 | ENSP00000334474 |
| ENSP00000281928 | ENSP00000337340 |
| ENSP00000281928 | ENSP00000357047 |
| ENSP00000281928 | ENSP00000357442 |
| ENSP00000281928 | ENSP00000357494 |
| ENSP00000281928 | ENSP00000357907 |
| ENSP00000281928 | ENSP00000365588 |
| ENSP00000281928 | ENSP00000373060 |
| ENSP00000281928 | ENSP00000384048 |
| ENSP00000281928 | ENSP00000387429 |
| ENSP00000281928 | ENSP00000391774 |
| ENSP00000281928 | ENSP00000396484 |
| ENSP00000281928 | ENSP00000404318 |
| ENSP00000281928 | ENSP00000409167 |
| ENSP00000281928 | ENSP00000415212 |
| ENSP00000281928 | ENSP00000416511 |
| ENSP00000281950 | ENSP00000300413 |
| ENSP00000281950 | ENSP00000308533 |
| ENSP00000281950 | ENSP00000321706 |
| ENSP00000281950 | ENSP00000328940 |
| ENSP00000281950 | ENSP00000342374 |
| ENSP00000281950 | ENSP00000358716 |
| ENSP00000281950 | ENSP00000360532 |
| ENSP00000281950 | ENSP00000370083 |
| ENSP00000281950 | ENSP00000370119 |
| ENSP00000281950 | ENSP00000392270 |
| ENSP00000281950 | ENSP00000400591 |
| ENSP00000281950 | ENSP00000412566 |
| ENSP00000282003 | ENSP00000360329 |
| ENSP00000282007 | ENSP00000282892 |
| ENSP00000282007 | ENSP00000285398 |
| ENSP00000282007 | ENSP00000285873 |
| ENSP00000282007 | ENSP00000290158 |
| ENSP00000282007 | ENSP00000290663 |
| ENSP00000282007 | ENSP00000291688 |
| ENSP00000282007 | ENSP00000292035 |
| ENSP00000282007 | ENSP00000297347 |
| ENSP00000282007 | ENSP00000298281 |
| ENSP00000282007 | ENSP00000300651 |
| ENSP00000282007 | ENSP00000308944 |
| ENSP00000282007 | ENSP00000312735 |
| ENSP00000282007 | ENSP00000314949 |
| ENSP00000282007 | ENSP00000315791 |

|                 |                 |
|-----------------|-----------------|
| ENSP00000282007 | ENSP00000323720 |
| ENSP00000282007 | ENSP00000323858 |
| ENSP00000282007 | ENSP00000325612 |
| ENSP00000282007 | ENSP00000326767 |
| ENSP00000282007 | ENSP00000329466 |
| ENSP00000282007 | ENSP00000331817 |
| ENSP00000282007 | ENSP00000336752 |
| ENSP00000282007 | ENSP00000336868 |
| ENSP00000282007 | ENSP00000337340 |
| ENSP00000282007 | ENSP00000343701 |
| ENSP00000282007 | ENSP00000343741 |
| ENSP00000282007 | ENSP00000348610 |
| ENSP00000282007 | ENSP00000352738 |
| ENSP00000282007 | ENSP00000352820 |
| ENSP00000282007 | ENSP00000353059 |
| ENSP00000282007 | ENSP00000356470 |
| ENSP00000282007 | ENSP00000357047 |
| ENSP00000282007 | ENSP00000357907 |
| ENSP00000282007 | ENSP00000362900 |
| ENSP00000282007 | ENSP00000363193 |
| ENSP00000282007 | ENSP00000364289 |
| ENSP00000282007 | ENSP00000365811 |
| ENSP00000282007 | ENSP00000366953 |
| ENSP00000282007 | ENSP00000372023 |
| ENSP00000282007 | ENSP00000417132 |
| ENSP00000282030 | ENSP00000307208 |
| ENSP00000282030 | ENSP00000323074 |
| ENSP00000282030 | ENSP00000329097 |
| ENSP00000282030 | ENSP00000352463 |
| ENSP00000282030 | ENSP00000367570 |
| ENSP00000282030 | ENSP00000368438 |
| ENSP00000282032 | ENSP00000326477 |
| ENSP00000282032 | ENSP00000357965 |
| ENSP00000282050 | ENSP00000284727 |
| ENSP00000282050 | ENSP00000287038 |
| ENSP00000282050 | ENSP00000290299 |
| ENSP00000282050 | ENSP00000290541 |
| ENSP00000282050 | ENSP00000292475 |
| ENSP00000282050 | ENSP00000296255 |
| ENSP00000282050 | ENSP00000299767 |
| ENSP00000282050 | ENSP00000300688 |
| ENSP00000282050 | ENSP00000301585 |
| ENSP00000282050 | ENSP00000301587 |
| ENSP00000282050 | ENSP00000306003 |
| ENSP00000282050 | ENSP00000309365 |
| ENSP00000282050 | ENSP00000311245 |

|                 |                 |
|-----------------|-----------------|
| ENSP00000282050 | ENSP00000311505 |
| ENSP00000282050 | ENSP00000311766 |
| ENSP00000282050 | ENSP00000317331 |
| ENSP00000282050 | ENSP00000319992 |
| ENSP00000282050 | ENSP00000325562 |
| ENSP00000282050 | ENSP00000327070 |
| ENSP00000282050 | ENSP00000331897 |
| ENSP00000282050 | ENSP00000332247 |
| ENSP00000282050 | ENSP00000332887 |
| ENSP00000282050 | ENSP00000335203 |
| ENSP00000282050 | ENSP00000341243 |
| ENSP00000282050 | ENSP00000343943 |
| ENSP00000282050 | ENSP00000346050 |
| ENSP00000282050 | ENSP00000349142 |
| ENSP00000282050 | ENSP00000350512 |
| ENSP00000282050 | ENSP00000352219 |
| ENSP00000282050 | ENSP00000354632 |
| ENSP00000282050 | ENSP00000355265 |
| ENSP00000282050 | ENSP00000355518 |
| ENSP00000282050 | ENSP00000356953 |
| ENSP00000282050 | ENSP00000358737 |
| ENSP00000282050 | ENSP00000360782 |
| ENSP00000282050 | ENSP00000361005 |
| ENSP00000282050 | ENSP00000361686 |
| ENSP00000282050 | ENSP00000363018 |
| ENSP00000282050 | ENSP00000363162 |
| ENSP00000282050 | ENSP00000363533 |
| ENSP00000282050 | ENSP00000364486 |
| ENSP00000282050 | ENSP00000365243 |
| ENSP00000282050 | ENSP00000367923 |
| ENSP00000282050 | ENSP00000367934 |
| ENSP00000282050 | ENSP00000369810 |
| ENSP00000282050 | ENSP00000369816 |
| ENSP00000282050 | ENSP00000370414 |
| ENSP00000282050 | ENSP00000374328 |
| ENSP00000282050 | ENSP00000379500 |
| ENSP00000282050 | ENSP00000379607 |
| ENSP00000282050 | ENSP00000380921 |
| ENSP00000282050 | ENSP00000387262 |
| ENSP00000282050 | ENSP00000389649 |
| ENSP00000282050 | ENSP00000393241 |
| ENSP00000282050 | ENSP00000393393 |
| ENSP00000282050 | ENSP00000401770 |
| ENSP00000282050 | ENSP00000403175 |
| ENSP00000282050 | ENSP00000412583 |
| ENSP00000282050 | ENSP00000416110 |

|                 |                 |
|-----------------|-----------------|
| ENSP00000282050 | ENSP00000417190 |
| ENSP00000282058 | ENSP00000301019 |
| ENSP00000282058 | ENSP00000360621 |
| ENSP00000282058 | ENSP00000369871 |
| ENSP00000282074 | ENSP00000302530 |
| ENSP00000282074 | ENSP00000306574 |
| ENSP00000282074 | ENSP00000363055 |
| ENSP00000282074 | ENSP00000370557 |
| ENSP00000282077 | ENSP00000288774 |
| ENSP00000282077 | ENSP00000302886 |
| ENSP00000282077 | ENSP00000307260 |
| ENSP00000282077 | ENSP00000307272 |
| ENSP00000282077 | ENSP00000307305 |
| ENSP00000282077 | ENSP00000313243 |
| ENSP00000282077 | ENSP00000322242 |
| ENSP00000282077 | ENSP00000344220 |
| ENSP00000282077 | ENSP00000348069 |
| ENSP00000282077 | ENSP00000348564 |
| ENSP00000282077 | ENSP00000354558 |
| ENSP00000282077 | ENSP00000357440 |
| ENSP00000282077 | ENSP00000359552 |
| ENSP00000282077 | ENSP00000361120 |
| ENSP00000282077 | ENSP00000361965 |
| ENSP00000282077 | ENSP00000380150 |
| ENSP00000282077 | ENSP00000394382 |
| ENSP00000282091 | ENSP00000321999 |
| ENSP00000282185 | ENSP00000283290 |
| ENSP00000282185 | ENSP00000296755 |
| ENSP00000282185 | ENSP00000343313 |
| ENSP00000282185 | ENSP00000343535 |
| ENSP00000282185 | ENSP00000346437 |
| ENSP00000282185 | ENSP00000349785 |
| ENSP00000282251 | ENSP00000296509 |
| ENSP00000282251 | ENSP00000298532 |
| ENSP00000282251 | ENSP00000304370 |
| ENSP00000282251 | ENSP00000334148 |
| ENSP00000282251 | ENSP00000345702 |
| ENSP00000282251 | ENSP00000360532 |
| ENSP00000282276 | ENSP00000294168 |
| ENSP00000282276 | ENSP00000303279 |
| ENSP00000282276 | ENSP00000306920 |
| ENSP00000282276 | ENSP00000307567 |
| ENSP00000282276 | ENSP00000318921 |
| ENSP00000282276 | ENSP00000327821 |
| ENSP00000282276 | ENSP00000337445 |
| ENSP00000282276 | ENSP00000339933 |

|                 |                 |
|-----------------|-----------------|
| ENSP00000282276 | ENSP00000344537 |
| ENSP00000282276 | ENSP00000355890 |
| ENSP00000282276 | ENSP00000358812 |
| ENSP00000282276 | ENSP00000360327 |
| ENSP00000282276 | ENSP00000362576 |
| ENSP00000282276 | ENSP00000364794 |
| ENSP00000282276 | ENSP00000367029 |
| ENSP00000282276 | ENSP00000369038 |
| ENSP00000282276 | ENSP00000373918 |
| ENSP00000282276 | ENSP00000374399 |
| ENSP00000282326 | ENSP00000282892 |
| ENSP00000282326 | ENSP00000283875 |
| ENSP00000282326 | ENSP00000285398 |
| ENSP00000282326 | ENSP00000286317 |
| ENSP00000282326 | ENSP00000287820 |
| ENSP00000282326 | ENSP00000299687 |
| ENSP00000282326 | ENSP00000303191 |
| ENSP00000282326 | ENSP00000306523 |
| ENSP00000282326 | ENSP00000312735 |
| ENSP00000282326 | ENSP00000340896 |
| ENSP00000282326 | ENSP00000342295 |
| ENSP00000282326 | ENSP00000358478 |
| ENSP00000282326 | ENSP00000360532 |
| ENSP00000282326 | ENSP00000398677 |
| ENSP00000282388 | ENSP00000283882 |
| ENSP00000282388 | ENSP00000322419 |
| ENSP00000282388 | ENSP00000335357 |
| ENSP00000282388 | ENSP00000343001 |
| ENSP00000282388 | ENSP00000350078 |
| ENSP00000282388 | ENSP00000351596 |
| ENSP00000282388 | ENSP00000354739 |
| ENSP00000282388 | ENSP00000354916 |
| ENSP00000282388 | ENSP00000355296 |
| ENSP00000282388 | ENSP00000359345 |
| ENSP00000282388 | ENSP00000364699 |
| ENSP00000282388 | ENSP00000365756 |
| ENSP00000282412 | ENSP00000301364 |
| ENSP00000282412 | ENSP00000311005 |
| ENSP00000282412 | ENSP00000315182 |
| ENSP00000282412 | ENSP00000349205 |
| ENSP00000282412 | ENSP00000350012 |
| ENSP00000282412 | ENSP00000353904 |
| ENSP00000282412 | ENSP00000355866 |
| ENSP00000282412 | ENSP00000356263 |
| ENSP00000282412 | ENSP00000358335 |
| ENSP00000282412 | ENSP00000360916 |



|                 |                 |
|-----------------|-----------------|
| ENSP00000282412 | ENSP00000361949 |
| ENSP00000282412 | ENSP00000365735 |
| ENSP00000282412 | ENSP00000368699 |
| ENSP00000282412 | ENSP00000370517 |
| ENSP00000282412 | ENSP00000378306 |
| ENSP00000282412 | ENSP00000378624 |
| ENSP00000282412 | ENSP00000381045 |
| ENSP00000282412 | ENSP00000401445 |
| ENSP00000282441 | ENSP00000288840 |
| ENSP00000282441 | ENSP00000295206 |
| ENSP00000282441 | ENSP00000301788 |
| ENSP00000282441 | ENSP00000307275 |
| ENSP00000282441 | ENSP00000310701 |
| ENSP00000282441 | ENSP00000318646 |
| ENSP00000282441 | ENSP00000324729 |
| ENSP00000282441 | ENSP00000339933 |
| ENSP00000282441 | ENSP00000341957 |
| ENSP00000282441 | ENSP00000344456 |
| ENSP00000282441 | ENSP00000352514 |
| ENSP00000282441 | ENSP00000352738 |
| ENSP00000282441 | ENSP00000355296 |
| ENSP00000282441 | ENSP00000355398 |
| ENSP00000282441 | ENSP00000356104 |
| ENSP00000282441 | ENSP00000359206 |
| ENSP00000282441 | ENSP00000361027 |
| ENSP00000282441 | ENSP00000363559 |
| ENSP00000282441 | ENSP00000366915 |
| ENSP00000282441 | ENSP00000383719 |
| ENSP00000282441 | ENSP00000408020 |
| ENSP00000282470 | ENSP00000355596 |
| ENSP00000282486 | ENSP00000284322 |
| ENSP00000282486 | ENSP00000303315 |
| ENSP00000282486 | ENSP00000356520 |
| ENSP00000282486 | ENSP00000365439 |
| ENSP00000282486 | ENSP00000396620 |
| ENSP00000282516 | ENSP00000296273 |
| ENSP00000282516 | ENSP00000296509 |
| ENSP00000282516 | ENSP00000297338 |
| ENSP00000282516 | ENSP00000299259 |
| ENSP00000282516 | ENSP00000306999 |
| ENSP00000282516 | ENSP00000308699 |
| ENSP00000282516 | ENSP00000313171 |
| ENSP00000282516 | ENSP00000313851 |
| ENSP00000282516 | ENSP00000318977 |
| ENSP00000282516 | ENSP00000322180 |
| ENSP00000282516 | ENSP00000329466 |

|                 |                 |
|-----------------|-----------------|
| ENSP00000282516 | ENSP00000334061 |
| ENSP00000282516 | ENSP00000343023 |
| ENSP00000282516 | ENSP00000347978 |
| ENSP00000282516 | ENSP00000349393 |
| ENSP00000282516 | ENSP00000353793 |
| ENSP00000282516 | ENSP00000354720 |
| ENSP00000282516 | ENSP00000355388 |
| ENSP00000282516 | ENSP00000357047 |
| ENSP00000282516 | ENSP00000360310 |
| ENSP00000282516 | ENSP00000360532 |
| ENSP00000282516 | ENSP00000361310 |
| ENSP00000282516 | ENSP00000361990 |
| ENSP00000282516 | ENSP00000364895 |
| ENSP00000282516 | ENSP00000365007 |
| ENSP00000282516 | ENSP00000367787 |
| ENSP00000282516 | ENSP00000369411 |
| ENSP00000282516 | ENSP00000369695 |
| ENSP00000282516 | ENSP00000370151 |
| ENSP00000282516 | ENSP00000372689 |
| ENSP00000282516 | ENSP00000376127 |
| ENSP00000282516 | ENSP00000382562 |
| ENSP00000282516 | ENSP00000391723 |
| ENSP00000282516 | ENSP00000404381 |
| ENSP00000282541 | ENSP00000290299 |
| ENSP00000282541 | ENSP00000292475 |
| ENSP00000282541 | ENSP00000296684 |
| ENSP00000282541 | ENSP00000308610 |
| ENSP00000282541 | ENSP00000317159 |
| ENSP00000282541 | ENSP00000318131 |
| ENSP00000282541 | ENSP00000320488 |
| ENSP00000282541 | ENSP00000324792 |
| ENSP00000282541 | ENSP00000330343 |
| ENSP00000282541 | ENSP00000336702 |
| ENSP00000282541 | ENSP00000341838 |
| ENSP00000282541 | ENSP00000353452 |
| ENSP00000282541 | ENSP00000355587 |
| ENSP00000282541 | ENSP00000358737 |
| ENSP00000282541 | ENSP00000362171 |
| ENSP00000282541 | ENSP00000363873 |
| ENSP00000282541 | ENSP00000364188 |
| ENSP00000282541 | ENSP00000368565 |
| ENSP00000282541 | ENSP00000375986 |
| ENSP00000282541 | ENSP00000397009 |
| ENSP00000282541 | ENSP00000397598 |
| ENSP00000282541 | ENSP00000417963 |
| ENSP00000282549 | ENSP00000310561 |

|                 |                 |
|-----------------|-----------------|
| ENSP00000282549 | ENSP00000361418 |
| ENSP00000282549 | ENSP00000365735 |
| ENSP00000282549 | ENSP00000377640 |
| ENSP00000282572 | ENSP00000287598 |
| ENSP00000282572 | ENSP00000296509 |
| ENSP00000282572 | ENSP00000302530 |
| ENSP00000282572 | ENSP00000306999 |
| ENSP00000282572 | ENSP00000307853 |
| ENSP00000282572 | ENSP00000310649 |
| ENSP00000282572 | ENSP00000343741 |
| ENSP00000282572 | ENSP00000351284 |
| ENSP00000282572 | ENSP00000352257 |
| ENSP00000282572 | ENSP00000353698 |
| ENSP00000282572 | ENSP00000360621 |
| ENSP00000282572 | ENSP00000360916 |
| ENSP00000282572 | ENSP00000363021 |
| ENSP00000282572 | ENSP00000363827 |
| ENSP00000282572 | ENSP00000368438 |
| ENSP00000282572 | ENSP00000370719 |
| ENSP00000282572 | ENSP00000372023 |
| ENSP00000282572 | ENSP00000377793 |
| ENSP00000282587 | ENSP00000350263 |
| ENSP00000282587 | ENSP00000353622 |
| ENSP00000282587 | ENSP00000372700 |
| ENSP00000282611 | ENSP00000311200 |
| ENSP00000282633 | ENSP00000402935 |
| ENSP00000282728 | ENSP00000306245 |
| ENSP00000282728 | ENSP00000345681 |
| ENSP00000282728 | ENSP00000350512 |
| ENSP00000282841 | ENSP00000283351 |
| ENSP00000282841 | ENSP00000287936 |
| ENSP00000282841 | ENSP00000295888 |
| ENSP00000282841 | ENSP00000322706 |
| ENSP00000282841 | ENSP00000333813 |
| ENSP00000282841 | ENSP00000333946 |
| ENSP00000282841 | ENSP00000341679 |
| ENSP00000282841 | ENSP00000349078 |
| ENSP00000282841 | ENSP00000349877 |
| ENSP00000282841 | ENSP00000355607 |
| ENSP00000282841 | ENSP00000356405 |
| ENSP00000282841 | ENSP00000360149 |
| ENSP00000282841 | ENSP00000365775 |
| ENSP00000282841 | ENSP00000366557 |
| ENSP00000282841 | ENSP00000374443 |
| ENSP00000282841 | ENSP00000376268 |
| ENSP00000282841 | ENSP00000380793 |

|                 |                 |
|-----------------|-----------------|
| ENSP00000282841 | ENSP00000381302 |
| ENSP00000282841 | ENSP00000383295 |
| ENSP00000282841 | ENSP00000386609 |
| ENSP00000282841 | ENSP00000415034 |
| ENSP00000282884 | ENSP00000283875 |
| ENSP00000282884 | ENSP00000286317 |
| ENSP00000282884 | ENSP00000298937 |
| ENSP00000282884 | ENSP00000301788 |
| ENSP00000282884 | ENSP00000323720 |
| ENSP00000282884 | ENSP00000343701 |
| ENSP00000282884 | ENSP00000345988 |
| ENSP00000282884 | ENSP00000348550 |
| ENSP00000282884 | ENSP00000350967 |
| ENSP00000282884 | ENSP00000356591 |
| ENSP00000282884 | ENSP00000357907 |
| ENSP00000282884 | ENSP00000358140 |
| ENSP00000282884 | ENSP00000359290 |
| ENSP00000282884 | ENSP00000363779 |
| ENSP00000282884 | ENSP00000363921 |
| ENSP00000282884 | ENSP00000364092 |
| ENSP00000282892 | ENSP00000283875 |
| ENSP00000282892 | ENSP00000286317 |
| ENSP00000282892 | ENSP00000293879 |
| ENSP00000282892 | ENSP00000296702 |
| ENSP00000282892 | ENSP00000296792 |
| ENSP00000282892 | ENSP00000297338 |
| ENSP00000282892 | ENSP00000297347 |
| ENSP00000282892 | ENSP00000299424 |
| ENSP00000282892 | ENSP00000299767 |
| ENSP00000282892 | ENSP00000300651 |
| ENSP00000282892 | ENSP00000303315 |
| ENSP00000282892 | ENSP00000306983 |
| ENSP00000282892 | ENSP00000307684 |
| ENSP00000282892 | ENSP00000311665 |
| ENSP00000282892 | ENSP00000314949 |
| ENSP00000282892 | ENSP00000318313 |
| ENSP00000282892 | ENSP00000322570 |
| ENSP00000282892 | ENSP00000323720 |
| ENSP00000282892 | ENSP00000326767 |
| ENSP00000282892 | ENSP00000337340 |
| ENSP00000282892 | ENSP00000339449 |
| ENSP00000282892 | ENSP00000348069 |
| ENSP00000282892 | ENSP00000348129 |
| ENSP00000282892 | ENSP00000350283 |
| ENSP00000282892 | ENSP00000351697 |
| ENSP00000282892 | ENSP00000356641 |

|                 |                 |
|-----------------|-----------------|
| ENSP00000282892 | ENSP00000356774 |
| ENSP00000282892 | ENSP00000357907 |
| ENSP00000282892 | ENSP00000359531 |
| ENSP00000282892 | ENSP00000360916 |
| ENSP00000282892 | ENSP00000362948 |
| ENSP00000282892 | ENSP00000363193 |
| ENSP00000282892 | ENSP00000368349 |
| ENSP00000282892 | ENSP00000368589 |
| ENSP00000282892 | ENSP00000369695 |
| ENSP00000282892 | ENSP00000369965 |
| ENSP00000282892 | ENSP00000377969 |
| ENSP00000282892 | ENSP00000395574 |
| ENSP00000282999 | ENSP00000294360 |
| ENSP00000282999 | ENSP00000300648 |
| ENSP00000282999 | ENSP00000305230 |
| ENSP00000282999 | ENSP00000312066 |
| ENSP00000282999 | ENSP00000314311 |
| ENSP00000282999 | ENSP00000327070 |
| ENSP00000282999 | ENSP00000336712 |
| ENSP00000282999 | ENSP00000342181 |
| ENSP00000282999 | ENSP00000343526 |
| ENSP00000282999 | ENSP00000343701 |
| ENSP00000282999 | ENSP00000362592 |
| ENSP00000282999 | ENSP00000369042 |
| ENSP00000282999 | ENSP00000369411 |
| ENSP00000283006 | ENSP00000296509 |
| ENSP00000283006 | ENSP00000336868 |
| ENSP00000283006 | ENSP00000357452 |
| ENSP00000283006 | ENSP00000364737 |
| ENSP00000283006 | ENSP00000377007 |
| ENSP00000283006 | ENSP00000420608 |
| ENSP00000283027 | ENSP00000309595 |
| ENSP00000283027 | ENSP00000351113 |
| ENSP00000283033 | ENSP00000292180 |
| ENSP00000283033 | ENSP00000297431 |
| ENSP00000283033 | ENSP00000299767 |
| ENSP00000283033 | ENSP00000309871 |
| ENSP00000283033 | ENSP00000317997 |
| ENSP00000283033 | ENSP00000321259 |
| ENSP00000283033 | ENSP00000331268 |
| ENSP00000283033 | ENSP00000340879 |
| ENSP00000283033 | ENSP00000341208 |
| ENSP00000283033 | ENSP00000382064 |
| ENSP00000283109 | ENSP00000285873 |
| ENSP00000283109 | ENSP00000293406 |
| ENSP00000283109 | ENSP00000296674 |

|                 |                 |
|-----------------|-----------------|
| ENSP00000283109 | ENSP00000296733 |
| ENSP00000283109 | ENSP00000296802 |
| ENSP00000283109 | ENSP00000297990 |
| ENSP00000283109 | ENSP00000301364 |
| ENSP00000283109 | ENSP00000302896 |
| ENSP00000283109 | ENSP00000308944 |
| ENSP00000283109 | ENSP00000311028 |
| ENSP00000283109 | ENSP00000314311 |
| ENSP00000283109 | ENSP00000314348 |
| ENSP00000283109 | ENSP00000317334 |
| ENSP00000283109 | ENSP00000317376 |
| ENSP00000283109 | ENSP00000318646 |
| ENSP00000283109 | ENSP00000323858 |
| ENSP00000283109 | ENSP00000326981 |
| ENSP00000283109 | ENSP00000331019 |
| ENSP00000283109 | ENSP00000337839 |
| ENSP00000283109 | ENSP00000339095 |
| ENSP00000283109 | ENSP00000341885 |
| ENSP00000283109 | ENSP00000342381 |
| ENSP00000283109 | ENSP00000346050 |
| ENSP00000283109 | ENSP00000351947 |
| ENSP00000283109 | ENSP00000352738 |
| ENSP00000283109 | ENSP00000354125 |
| ENSP00000283109 | ENSP00000355471 |
| ENSP00000283109 | ENSP00000355899 |
| ENSP00000283109 | ENSP00000356134 |
| ENSP00000283109 | ENSP00000356548 |
| ENSP00000283109 | ENSP00000358140 |
| ENSP00000283109 | ENSP00000360031 |
| ENSP00000283109 | ENSP00000364293 |
| ENSP00000283109 | ENSP00000365025 |
| ENSP00000283109 | ENSP00000366121 |
| ENSP00000283109 | ENSP00000368927 |
| ENSP00000283109 | ENSP00000369162 |
| ENSP00000283109 | ENSP00000369757 |
| ENSP00000283109 | ENSP00000372199 |
| ENSP00000283109 | ENSP00000376946 |
| ENSP00000283109 | ENSP00000378529 |
| ENSP00000283109 | ENSP00000379339 |
| ENSP00000283109 | ENSP00000379888 |
| ENSP00000283109 | ENSP00000393241 |
| ENSP00000283109 | ENSP00000402240 |
| ENSP00000283109 | ENSP00000403175 |
| ENSP00000283109 | ENSP00000414321 |
| ENSP00000283109 | ENSP00000416110 |
| ENSP00000283109 | ENSP00000417229 |

|                 |                 |
|-----------------|-----------------|
| ENSP00000283109 | ENSP00000418734 |
| ENSP00000283109 | ENSP00000420714 |
| ENSP00000283147 | ENSP00000297261 |
| ENSP00000283147 | ENSP00000328181 |
| ENSP00000283147 | ENSP00000332353 |
| ENSP00000283147 | ENSP00000363708 |
| ENSP00000283195 | ENSP00000285968 |
| ENSP00000283195 | ENSP00000290158 |
| ENSP00000283195 | ENSP00000294724 |
| ENSP00000283195 | ENSP00000295897 |
| ENSP00000283195 | ENSP00000297338 |
| ENSP00000283195 | ENSP00000300128 |
| ENSP00000283195 | ENSP00000302886 |
| ENSP00000283195 | ENSP00000305503 |
| ENSP00000283195 | ENSP00000306697 |
| ENSP00000283195 | ENSP00000309474 |
| ENSP00000283195 | ENSP00000310668 |
| ENSP00000283195 | ENSP00000312778 |
| ENSP00000283195 | ENSP00000316032 |
| ENSP00000283195 | ENSP00000316121 |
| ENSP00000283195 | ENSP00000322218 |
| ENSP00000283195 | ENSP00000325312 |
| ENSP00000283195 | ENSP00000325690 |
| ENSP00000283195 | ENSP00000327821 |
| ENSP00000283195 | ENSP00000329466 |
| ENSP00000283195 | ENSP00000330343 |
| ENSP00000283195 | ENSP00000336712 |
| ENSP00000283195 | ENSP00000343023 |
| ENSP00000283195 | ENSP00000343701 |
| ENSP00000283195 | ENSP00000344456 |
| ENSP00000283195 | ENSP00000346453 |
| ENSP00000283195 | ENSP00000348551 |
| ENSP00000283195 | ENSP00000348577 |
| ENSP00000283195 | ENSP00000352400 |
| ENSP00000283195 | ENSP00000353741 |
| ENSP00000283195 | ENSP00000354560 |
| ENSP00000283195 | ENSP00000354718 |
| ENSP00000283195 | ENSP00000354742 |
| ENSP00000283195 | ENSP00000354895 |
| ENSP00000283195 | ENSP00000355865 |
| ENSP00000283195 | ENSP00000356405 |
| ENSP00000283195 | ENSP00000356548 |
| ENSP00000283195 | ENSP00000360286 |
| ENSP00000283195 | ENSP00000360532 |
| ENSP00000283195 | ENSP00000361418 |
| ENSP00000283195 | ENSP00000366557 |

|                 |                 |
|-----------------|-----------------|
| ENSP00000283195 | ENSP00000369042 |
| ENSP00000283195 | ENSP00000369162 |
| ENSP00000283195 | ENSP00000371155 |
| ENSP00000283195 | ENSP00000386759 |
| ENSP00000283195 | ENSP00000386992 |
| ENSP00000283195 | ENSP00000391723 |
| ENSP00000283195 | ENSP00000394791 |
| ENSP00000283195 | ENSP00000396704 |
| ENSP00000283195 | ENSP00000414187 |
| ENSP00000283195 | ENSP00000417281 |
| ENSP00000283228 | ENSP00000288602 |
| ENSP00000283228 | ENSP00000311005 |
| ENSP00000283228 | ENSP00000339952 |
| ENSP00000283228 | ENSP00000375986 |
| ENSP00000283228 | ENSP00000402084 |
| ENSP00000283290 | ENSP00000287239 |
| ENSP00000283290 | ENSP00000296755 |
| ENSP00000283290 | ENSP00000311318 |
| ENSP00000283290 | ENSP00000318313 |
| ENSP00000283290 | ENSP00000328940 |
| ENSP00000283290 | ENSP00000334061 |
| ENSP00000283290 | ENSP00000335557 |
| ENSP00000283290 | ENSP00000343313 |
| ENSP00000283290 | ENSP00000346437 |
| ENSP00000283290 | ENSP00000349785 |
| ENSP00000283290 | ENSP00000356379 |
| ENSP00000283290 | ENSP00000361418 |
| ENSP00000283290 | ENSP00000404923 |
| ENSP00000283351 | ENSP00000291574 |
| ENSP00000283351 | ENSP00000296786 |
| ENSP00000283351 | ENSP00000299206 |
| ENSP00000283351 | ENSP00000301021 |
| ENSP00000283351 | ENSP00000302783 |
| ENSP00000283351 | ENSP00000303554 |
| ENSP00000283351 | ENSP00000305459 |
| ENSP00000283351 | ENSP00000308496 |
| ENSP00000283351 | ENSP00000311134 |
| ENSP00000283351 | ENSP00000316990 |
| ENSP00000283351 | ENSP00000325506 |
| ENSP00000283351 | ENSP00000326869 |
| ENSP00000283351 | ENSP00000327716 |
| ENSP00000283351 | ENSP00000348442 |
| ENSP00000283351 | ENSP00000349887 |
| ENSP00000283351 | ENSP00000352708 |
| ENSP00000283351 | ENSP00000352738 |
| ENSP00000283351 | ENSP00000355231 |



|                 |                 |
|-----------------|-----------------|
| ENSP00000283351 | ENSP00000360183 |
| ENSP00000283351 | ENSP00000360216 |
| ENSP00000283351 | ENSP00000360644 |
| ENSP00000283351 | ENSP00000360798 |
| ENSP00000283351 | ENSP00000369860 |
| ENSP00000283351 | ENSP00000373979 |
| ENSP00000283351 | ENSP00000376268 |
| ENSP00000283351 | ENSP00000377769 |
| ENSP00000283351 | ENSP00000397441 |
| ENSP00000283351 | ENSP00000402240 |
| ENSP00000283351 | ENSP00000404923 |
| ENSP00000283351 | ENSP00000409231 |
| ENSP00000283426 | ENSP00000313172 |
| ENSP00000283429 | ENSP00000323880 |
| ENSP00000283429 | ENSP00000360782 |
| ENSP00000283628 | ENSP00000351250 |
| ENSP00000283628 | ENSP00000362013 |
| ENSP00000283628 | ENSP00000389175 |
| ENSP00000283628 | ENSP00000417281 |
| ENSP00000283635 | ENSP00000325589 |
| ENSP00000283635 | ENSP00000334538 |
| ENSP00000283635 | ENSP00000340210 |
| ENSP00000283635 | ENSP00000354119 |
| ENSP00000283635 | ENSP00000356346 |
| ENSP00000283635 | ENSP00000356652 |
| ENSP00000283646 | ENSP00000329715 |
| ENSP00000283646 | ENSP00000337443 |
| ENSP00000283646 | ENSP00000349142 |
| ENSP00000283646 | ENSP00000356602 |
| ENSP00000283646 | ENSP00000359976 |
| ENSP00000283646 | ENSP00000369736 |
| ENSP00000283646 | ENSP00000370410 |
| ENSP00000283646 | ENSP00000372697 |
| ENSP00000283646 | ENSP00000386394 |
| ENSP00000283646 | ENSP00000390831 |
| ENSP00000283646 | ENSP00000391197 |
| ENSP00000283646 | ENSP00000401435 |
| ENSP00000283646 | ENSP00000404016 |
| ENSP00000283646 | ENSP00000406988 |
| ENSP00000283646 | ENSP00000409952 |
| ENSP00000283871 | ENSP00000311825 |
| ENSP00000283875 | ENSP00000285398 |
| ENSP00000283875 | ENSP00000312735 |
| ENSP00000283875 | ENSP00000314949 |
| ENSP00000283875 | ENSP00000329933 |
| ENSP00000283875 | ENSP00000336856 |

|                 |                 |
|-----------------|-----------------|
| ENSP00000283875 | ENSP00000340409 |
| ENSP00000283875 | ENSP00000340823 |
| ENSP00000283875 | ENSP00000342889 |
| ENSP00000283875 | ENSP00000343129 |
| ENSP00000283875 | ENSP00000344537 |
| ENSP00000283875 | ENSP00000346453 |
| ENSP00000283875 | ENSP00000346762 |
| ENSP00000283875 | ENSP00000348168 |
| ENSP00000283875 | ENSP00000348915 |
| ENSP00000283875 | ENSP00000350283 |
| ENSP00000283875 | ENSP00000353332 |
| ENSP00000283875 | ENSP00000354633 |
| ENSP00000283875 | ENSP00000357965 |
| ENSP00000283875 | ENSP00000359531 |
| ENSP00000283875 | ENSP00000361465 |
| ENSP00000283875 | ENSP00000362352 |
| ENSP00000283875 | ENSP00000370105 |
| ENSP00000283875 | ENSP00000375809 |
| ENSP00000283875 | ENSP00000377969 |
| ENSP00000283875 | ENSP00000378503 |
| ENSP00000283875 | ENSP00000379372 |
| ENSP00000283875 | ENSP00000417281 |
| ENSP00000283882 | ENSP00000286428 |
| ENSP00000283882 | ENSP00000287598 |
| ENSP00000283882 | ENSP00000291688 |
| ENSP00000283882 | ENSP00000293860 |
| ENSP00000283882 | ENSP00000295066 |
| ENSP00000283882 | ENSP00000296509 |
| ENSP00000283882 | ENSP00000299601 |
| ENSP00000283882 | ENSP00000300249 |
| ENSP00000283882 | ENSP00000302530 |
| ENSP00000283882 | ENSP00000304593 |
| ENSP00000283882 | ENSP00000306561 |
| ENSP00000283882 | ENSP00000306983 |
| ENSP00000283882 | ENSP00000307208 |
| ENSP00000283882 | ENSP00000307684 |
| ENSP00000283882 | ENSP00000307853 |
| ENSP00000283882 | ENSP00000312244 |
| ENSP00000283882 | ENSP00000312697 |
| ENSP00000283882 | ENSP00000314129 |
| ENSP00000283882 | ENSP00000320566 |
| ENSP00000283882 | ENSP00000322180 |
| ENSP00000283882 | ENSP00000322579 |
| ENSP00000283882 | ENSP00000325677 |
| ENSP00000283882 | ENSP00000329933 |
| ENSP00000283882 | ENSP00000331111 |

|                 |                 |
|-----------------|-----------------|
| ENSP00000283882 | ENSP00000331310 |
| ENSP00000283882 | ENSP00000334188 |
| ENSP00000283882 | ENSP00000337405 |
| ENSP00000283882 | ENSP00000339090 |
| ENSP00000283882 | ENSP00000340093 |
| ENSP00000283882 | ENSP00000340271 |
| ENSP00000283882 | ENSP00000340896 |
| ENSP00000283882 | ENSP00000347602 |
| ENSP00000283882 | ENSP00000347719 |
| ENSP00000283882 | ENSP00000348551 |
| ENSP00000283882 | ENSP00000351284 |
| ENSP00000283882 | ENSP00000352738 |
| ENSP00000283882 | ENSP00000353622 |
| ENSP00000283882 | ENSP00000355205 |
| ENSP00000283882 | ENSP00000356405 |
| ENSP00000283882 | ENSP00000356989 |
| ENSP00000283882 | ENSP00000357887 |
| ENSP00000283882 | ENSP00000359518 |
| ENSP00000283882 | ENSP00000360116 |
| ENSP00000283882 | ENSP00000360473 |
| ENSP00000283882 | ENSP00000360515 |
| ENSP00000283882 | ENSP00000362166 |
| ENSP00000283882 | ENSP00000362352 |
| ENSP00000283882 | ENSP00000362592 |
| ENSP00000283882 | ENSP00000364929 |
| ENSP00000283882 | ENSP00000369695 |
| ENSP00000283882 | ENSP00000374213 |
| ENSP00000283882 | ENSP00000374280 |
| ENSP00000283882 | ENSP00000376204 |
| ENSP00000283882 | ENSP00000378180 |
| ENSP00000283882 | ENSP00000381031 |
| ENSP00000283882 | ENSP00000382562 |
| ENSP00000283882 | ENSP00000383503 |
| ENSP00000283882 | ENSP00000386759 |
| ENSP00000283882 | ENSP00000397636 |
| ENSP00000283882 | ENSP00000402240 |
| ENSP00000283882 | ENSP00000405636 |
| ENSP00000283882 | ENSP00000406293 |
| ENSP00000283882 | ENSP00000410530 |
| ENSP00000283882 | ENSP00000410954 |
| ENSP00000283882 | ENSP00000414110 |
| ENSP00000283882 | ENSP00000416599 |
| ENSP00000283921 | ENSP00000303088 |
| ENSP00000283921 | ENSP00000318423 |
| ENSP00000283921 | ENSP00000340944 |
| ENSP00000283921 | ENSP00000362588 |

|                 |                 |
|-----------------|-----------------|
| ENSP00000283928 | ENSP00000291688 |
| ENSP00000283928 | ENSP00000298630 |
| ENSP00000283928 | ENSP00000307272 |
| ENSP00000283928 | ENSP00000313420 |
| ENSP00000283928 | ENSP00000334564 |
| ENSP00000283928 | ENSP00000341743 |
| ENSP00000283928 | ENSP00000347733 |
| ENSP00000283928 | ENSP00000354558 |
| ENSP00000283928 | ENSP00000355511 |
| ENSP00000283928 | ENSP00000363944 |
| ENSP00000283928 | ENSP00000365025 |
| ENSP00000283928 | ENSP00000371888 |
| ENSP00000283928 | ENSP00000394071 |
| ENSP00000283928 | ENSP00000402515 |
| ENSP00000283943 | ENSP00000295951 |
| ENSP00000283943 | ENSP00000302111 |
| ENSP00000283943 | ENSP00000308268 |
| ENSP00000283943 | ENSP00000308546 |
| ENSP00000283943 | ENSP00000309610 |
| ENSP00000283943 | ENSP00000310129 |
| ENSP00000283943 | ENSP00000323967 |
| ENSP00000283943 | ENSP00000327716 |
| ENSP00000283943 | ENSP00000329466 |
| ENSP00000283943 | ENSP00000334044 |
| ENSP00000283943 | ENSP00000335304 |
| ENSP00000283943 | ENSP00000339484 |
| ENSP00000283943 | ENSP00000340823 |
| ENSP00000283943 | ENSP00000343001 |
| ENSP00000283943 | ENSP00000343535 |
| ENSP00000283943 | ENSP00000355153 |
| ENSP00000283943 | ENSP00000361990 |
| ENSP00000283943 | ENSP00000362578 |
| ENSP00000283943 | ENSP00000366249 |
| ENSP00000283943 | ENSP00000366513 |
| ENSP00000283943 | ENSP00000368699 |
| ENSP00000283943 | ENSP00000373039 |
| ENSP00000283943 | ENSP00000379457 |
| ENSP00000283943 | ENSP00000386918 |
| ENSP00000283943 | ENSP00000396152 |
| ENSP00000283943 | ENSP00000410416 |
| ENSP00000284000 | ENSP00000305422 |
| ENSP00000284000 | ENSP00000306245 |
| ENSP00000284000 | ENSP00000336790 |
| ENSP00000284000 | ENSP00000340671 |
| ENSP00000284000 | ENSP00000340823 |
| ENSP00000284000 | ENSP00000368686 |

|                 |                 |
|-----------------|-----------------|
| ENSP00000284000 | ENSP00000386165 |
| ENSP00000284000 | ENSP00000392617 |
| ENSP00000284031 | ENSP00000311505 |
| ENSP00000284202 | ENSP00000300648 |
| ENSP00000284202 | ENSP00000304102 |
| ENSP00000284202 | ENSP00000304668 |
| ENSP00000284202 | ENSP00000310040 |
| ENSP00000284202 | ENSP00000318646 |
| ENSP00000284202 | ENSP00000348442 |
| ENSP00000284202 | ENSP00000350512 |
| ENSP00000284202 | ENSP00000354125 |
| ENSP00000284202 | ENSP00000356811 |
| ENSP00000284202 | ENSP00000358140 |
| ENSP00000284202 | ENSP00000360992 |
| ENSP00000284202 | ENSP00000388920 |
| ENSP00000284202 | ENSP00000417229 |
| ENSP00000284202 | ENSP00000420357 |
| ENSP00000284268 | ENSP00000346067 |
| ENSP00000284320 | ENSP00000308610 |
| ENSP00000284320 | ENSP00000315693 |
| ENSP00000284320 | ENSP00000318115 |
| ENSP00000284320 | ENSP00000320508 |
| ENSP00000284320 | ENSP00000354204 |
| ENSP00000284320 | ENSP00000357360 |
| ENSP00000284320 | ENSP00000358997 |
| ENSP00000284320 | ENSP00000361686 |
| ENSP00000284320 | ENSP00000361993 |
| ENSP00000284320 | ENSP00000364289 |
| ENSP00000284320 | ENSP00000364699 |
| ENSP00000284320 | ENSP00000368140 |
| ENSP00000284320 | ENSP00000387262 |
| ENSP00000284601 | ENSP00000285896 |
| ENSP00000284601 | ENSP00000294724 |
| ENSP00000284601 | ENSP00000317904 |
| ENSP00000284601 | ENSP00000350132 |
| ENSP00000284601 | ENSP00000350283 |
| ENSP00000284601 | ENSP00000384490 |
| ENSP00000284637 | ENSP00000302239 |
| ENSP00000284637 | ENSP00000307387 |
| ENSP00000284637 | ENSP00000309871 |
| ENSP00000284637 | ENSP00000322457 |
| ENSP00000284637 | ENSP00000324857 |
| ENSP00000284637 | ENSP00000345530 |
| ENSP00000284637 | ENSP00000361699 |
| ENSP00000284637 | ENSP00000362807 |
| ENSP00000284637 | ENSP00000363250 |

|                 |                 |
|-----------------|-----------------|
| ENSP00000284637 | ENSP00000365891 |
| ENSP00000284637 | ENSP00000370003 |
| ENSP00000284637 | ENSP00000379228 |
| ENSP00000284719 | ENSP00000287652 |
| ENSP00000284719 | ENSP00000290330 |
| ENSP00000284719 | ENSP00000290846 |
| ENSP00000284719 | ENSP00000291576 |
| ENSP00000284719 | ENSP00000296805 |
| ENSP00000284719 | ENSP00000300648 |
| ENSP00000284719 | ENSP00000304185 |
| ENSP00000284719 | ENSP00000310129 |
| ENSP00000284719 | ENSP00000310649 |
| ENSP00000284719 | ENSP00000312042 |
| ENSP00000284719 | ENSP00000319169 |
| ENSP00000284719 | ENSP00000322016 |
| ENSP00000284719 | ENSP00000323046 |
| ENSP00000284719 | ENSP00000345023 |
| ENSP00000284719 | ENSP00000355941 |
| ENSP00000284719 | ENSP00000358695 |
| ENSP00000284719 | ENSP00000358812 |
| ENSP00000284719 | ENSP00000361287 |
| ENSP00000284719 | ENSP00000361433 |
| ENSP00000284719 | ENSP00000364815 |
| ENSP00000284719 | ENSP00000367299 |
| ENSP00000284719 | ENSP00000369038 |
| ENSP00000284719 | ENSP00000384302 |
| ENSP00000284719 | ENSP00000396704 |
| ENSP00000284719 | ENSP00000401121 |
| ENSP00000284719 | ENSP00000403359 |
| ENSP00000284719 | ENSP00000410758 |
| ENSP00000284719 | ENSP00000415316 |
| ENSP00000284727 | ENSP00000290299 |
| ENSP00000284727 | ENSP00000295890 |
| ENSP00000284727 | ENSP00000297185 |
| ENSP00000284727 | ENSP00000301587 |
| ENSP00000284727 | ENSP00000332247 |
| ENSP00000284727 | ENSP00000343885 |
| ENSP00000284727 | ENSP00000349142 |
| ENSP00000284727 | ENSP00000352522 |
| ENSP00000284727 | ENSP00000354632 |
| ENSP00000284727 | ENSP00000354673 |
| ENSP00000284727 | ENSP00000358737 |
| ENSP00000284727 | ENSP00000361982 |
| ENSP00000284727 | ENSP00000363162 |
| ENSP00000284727 | ENSP00000370414 |
| ENSP00000284727 | ENSP00000379282 |

|                 |                 |
|-----------------|-----------------|
| ENSP00000284727 | ENSP00000390746 |
| ENSP00000284770 | ENSP00000309606 |
| ENSP00000284776 | ENSP00000324857 |
| ENSP00000284776 | ENSP00000346022 |
| ENSP00000284776 | ENSP00000346453 |
| ENSP00000284776 | ENSP00000352425 |
| ENSP00000284776 | ENSP00000356595 |
| ENSP00000284776 | ENSP00000361824 |
| ENSP00000284776 | ENSP00000383623 |
| ENSP00000284776 | ENSP00000400258 |
| ENSP00000284776 | ENSP00000417281 |
| ENSP00000284811 | ENSP00000287878 |
| ENSP00000284811 | ENSP00000288985 |
| ENSP00000284811 | ENSP00000290663 |
| ENSP00000284811 | ENSP00000291900 |
| ENSP00000284811 | ENSP00000296328 |
| ENSP00000284811 | ENSP00000298288 |
| ENSP00000284811 | ENSP00000301717 |
| ENSP00000284811 | ENSP00000304102 |
| ENSP00000284811 | ENSP00000305133 |
| ENSP00000284811 | ENSP00000307854 |
| ENSP00000284811 | ENSP00000308236 |
| ENSP00000284811 | ENSP00000308944 |
| ENSP00000284811 | ENSP00000314949 |
| ENSP00000284811 | ENSP00000318674 |
| ENSP00000284811 | ENSP00000321386 |
| ENSP00000284811 | ENSP00000321927 |
| ENSP00000284811 | ENSP00000325448 |
| ENSP00000284811 | ENSP00000330098 |
| ENSP00000284811 | ENSP00000334675 |
| ENSP00000284811 | ENSP00000343298 |
| ENSP00000284811 | ENSP00000348089 |
| ENSP00000284811 | ENSP00000350009 |
| ENSP00000284811 | ENSP00000350633 |
| ENSP00000284811 | ENSP00000351284 |
| ENSP00000284811 | ENSP00000353698 |
| ENSP00000284811 | ENSP00000358478 |
| ENSP00000284811 | ENSP00000361707 |
| ENSP00000284811 | ENSP00000366271 |
| ENSP00000284811 | ENSP00000370968 |
| ENSP00000284811 | ENSP00000381567 |
| ENSP00000284811 | ENSP00000395574 |
| ENSP00000284811 | ENSP00000403852 |
| ENSP00000284811 | ENSP00000409346 |
| ENSP00000284811 | ENSP00000418111 |
| ENSP00000284818 | ENSP00000363089 |

|                 |                 |
|-----------------|-----------------|
| ENSP00000284957 | ENSP00000295888 |
| ENSP00000284957 | ENSP00000299138 |
| ENSP00000284957 | ENSP00000317955 |
| ENSP00000284957 | ENSP00000320898 |
| ENSP00000284957 | ENSP00000334100 |
| ENSP00000284957 | ENSP00000353564 |
| ENSP00000284957 | ENSP00000354522 |
| ENSP00000284957 | ENSP00000354558 |
| ENSP00000284957 | ENSP00000354957 |
| ENSP00000284957 | ENSP00000364212 |
| ENSP00000284957 | ENSP00000366746 |
| ENSP00000284957 | ENSP00000374443 |
| ENSP00000284957 | ENSP00000377148 |
| ENSP00000284957 | ENSP00000381293 |
| ENSP00000284957 | ENSP00000383295 |
| ENSP00000284957 | ENSP00000397441 |
| ENSP00000284957 | ENSP00000415034 |
| ENSP00000284957 | ENSP00000419628 |
| ENSP00000284981 | ENSP00000287878 |
| ENSP00000284981 | ENSP00000289749 |
| ENSP00000284981 | ENSP00000290810 |
| ENSP00000284981 | ENSP00000294785 |
| ENSP00000284981 | ENSP00000295974 |
| ENSP00000284981 | ENSP00000296861 |
| ENSP00000284981 | ENSP00000306245 |
| ENSP00000284981 | ENSP00000309968 |
| ENSP00000284981 | ENSP00000313391 |
| ENSP00000284981 | ENSP00000325136 |
| ENSP00000284981 | ENSP00000326366 |
| ENSP00000284981 | ENSP00000329668 |
| ENSP00000284981 | ENSP00000331201 |
| ENSP00000284981 | ENSP00000332979 |
| ENSP00000284981 | ENSP00000338345 |
| ENSP00000284981 | ENSP00000339191 |
| ENSP00000284981 | ENSP00000340019 |
| ENSP00000284981 | ENSP00000340820 |
| ENSP00000284981 | ENSP00000341957 |
| ENSP00000284981 | ENSP00000345096 |
| ENSP00000284981 | ENSP00000347169 |
| ENSP00000284981 | ENSP00000348273 |
| ENSP00000284981 | ENSP00000349022 |
| ENSP00000284981 | ENSP00000349679 |
| ENSP00000284981 | ENSP00000350718 |
| ENSP00000284981 | ENSP00000351015 |
| ENSP00000284981 | ENSP00000351908 |
| ENSP00000284981 | ENSP00000355865 |



|                 |                 |
|-----------------|-----------------|
| ENSP00000284981 | ENSP00000355896 |
| ENSP00000284981 | ENSP00000360141 |
| ENSP00000284981 | ENSP00000361824 |
| ENSP00000284981 | ENSP00000362399 |
| ENSP00000284981 | ENSP00000363193 |
| ENSP00000284981 | ENSP00000363827 |
| ENSP00000284981 | ENSP00000366395 |
| ENSP00000284981 | ENSP00000366513 |
| ENSP00000284981 | ENSP00000376445 |
| ENSP00000284981 | ENSP00000378368 |
| ENSP00000284981 | ENSP00000381293 |
| ENSP00000284981 | ENSP00000384223 |
| ENSP00000284981 | ENSP00000390948 |
| ENSP00000284981 | ENSP00000392330 |
| ENSP00000284981 | ENSP00000417281 |
| ENSP00000284995 | ENSP00000304704 |
| ENSP00000284995 | ENSP00000305524 |
| ENSP00000284995 | ENSP00000323046 |
| ENSP00000284995 | ENSP00000327487 |
| ENSP00000284995 | ENSP00000353998 |
| ENSP00000284995 | ENSP00000355299 |
| ENSP00000284995 | ENSP00000361433 |
| ENSP00000284995 | ENSP00000402240 |
| ENSP00000285021 | ENSP00000285398 |
| ENSP00000285021 | ENSP00000288828 |
| ENSP00000285021 | ENSP00000288985 |
| ENSP00000285021 | ENSP00000296273 |
| ENSP00000285021 | ENSP00000297185 |
| ENSP00000285021 | ENSP00000298852 |
| ENSP00000285021 | ENSP00000301280 |
| ENSP00000285021 | ENSP00000301764 |
| ENSP00000285021 | ENSP00000302160 |
| ENSP00000285021 | ENSP00000303554 |
| ENSP00000285021 | ENSP00000304350 |
| ENSP00000285021 | ENSP00000306561 |
| ENSP00000285021 | ENSP00000308466 |
| ENSP00000285021 | ENSP00000308944 |
| ENSP00000285021 | ENSP00000310520 |
| ENSP00000285021 | ENSP00000313171 |
| ENSP00000285021 | ENSP00000317334 |
| ENSP00000285021 | ENSP00000318674 |
| ENSP00000285021 | ENSP00000321386 |
| ENSP00000285021 | ENSP00000321927 |
| ENSP00000285021 | ENSP00000322570 |
| ENSP00000285021 | ENSP00000323439 |
| ENSP00000285021 | ENSP00000324122 |

|                 |                 |
|-----------------|-----------------|
| ENSP00000285021 | ENSP00000325506 |
| ENSP00000285021 | ENSP00000330098 |
| ENSP00000285021 | ENSP00000334675 |
| ENSP00000285021 | ENSP00000336606 |
| ENSP00000285021 | ENSP00000343001 |
| ENSP00000285021 | ENSP00000343392 |
| ENSP00000285021 | ENSP00000343741 |
| ENSP00000285021 | ENSP00000347836 |
| ENSP00000285021 | ENSP00000348020 |
| ENSP00000285021 | ENSP00000348089 |
| ENSP00000285021 | ENSP00000349213 |
| ENSP00000285021 | ENSP00000349393 |
| ENSP00000285021 | ENSP00000350708 |
| ENSP00000285021 | ENSP00000351697 |
| ENSP00000285021 | ENSP00000354720 |
| ENSP00000285021 | ENSP00000355205 |
| ENSP00000285021 | ENSP00000358478 |
| ENSP00000285021 | ENSP00000360116 |
| ENSP00000285021 | ENSP00000362441 |
| ENSP00000285021 | ENSP00000364270 |
| ENSP00000285021 | ENSP00000366271 |
| ENSP00000285021 | ENSP00000366974 |
| ENSP00000285021 | ENSP00000367787 |
| ENSP00000285021 | ENSP00000368349 |
| ENSP00000285021 | ENSP00000368438 |
| ENSP00000285021 | ENSP00000369411 |
| ENSP00000285021 | ENSP00000369716 |
| ENSP00000285021 | ENSP00000369860 |
| ENSP00000285021 | ENSP00000369897 |
| ENSP00000285021 | ENSP00000370151 |
| ENSP00000285021 | ENSP00000370589 |
| ENSP00000285021 | ENSP00000372023 |
| ENSP00000285021 | ENSP00000376268 |
| ENSP00000285021 | ENSP00000376611 |
| ENSP00000285021 | ENSP00000376946 |
| ENSP00000285021 | ENSP00000391723 |
| ENSP00000285021 | ENSP00000391944 |
| ENSP00000285021 | ENSP00000406490 |
| ENSP00000285021 | ENSP00000418111 |
| ENSP00000285046 | ENSP00000306523 |
| ENSP00000285046 | ENSP00000358423 |
| ENSP00000285071 | ENSP00000354558 |
| ENSP00000285083 | ENSP00000317159 |
| ENSP00000285083 | ENSP00000326579 |
| ENSP00000285083 | ENSP00000361686 |
| ENSP00000285083 | ENSP00000378350 |

|                 |                 |
|-----------------|-----------------|
| ENSP00000285116 | ENSP00000319417 |
| ENSP00000285116 | ENSP00000333433 |
| ENSP00000285116 | ENSP00000370557 |
| ENSP00000285243 | ENSP00000304704 |
| ENSP00000285243 | ENSP00000308339 |
| ENSP00000285243 | ENSP00000310521 |
| ENSP00000285243 | ENSP00000322419 |
| ENSP00000285243 | ENSP00000356530 |
| ENSP00000285243 | ENSP00000362208 |
| ENSP00000285243 | ENSP00000362807 |
| ENSP00000285243 | ENSP00000401445 |
| ENSP00000285273 | ENSP00000292180 |
| ENSP00000285273 | ENSP00000322706 |
| ENSP00000285273 | ENSP00000355968 |
| ENSP00000285279 | ENSP00000359321 |
| ENSP00000285298 | ENSP00000301585 |
| ENSP00000285298 | ENSP00000348965 |
| ENSP00000285298 | ENSP00000379607 |
| ENSP00000285397 | ENSP00000312042 |
| ENSP00000285398 | ENSP00000290158 |
| ENSP00000285398 | ENSP00000300648 |
| ENSP00000285398 | ENSP00000303507 |
| ENSP00000285398 | ENSP00000305958 |
| ENSP00000285398 | ENSP00000306124 |
| ENSP00000285398 | ENSP00000307567 |
| ENSP00000285398 | ENSP00000314949 |
| ENSP00000285398 | ENSP00000324792 |
| ENSP00000285398 | ENSP00000329029 |
| ENSP00000285398 | ENSP00000330343 |
| ENSP00000285398 | ENSP00000339826 |
| ENSP00000285398 | ENSP00000341243 |
| ENSP00000285398 | ENSP00000346791 |
| ENSP00000285398 | ENSP00000347978 |
| ENSP00000285398 | ENSP00000348089 |
| ENSP00000285398 | ENSP00000348168 |
| ENSP00000285398 | ENSP00000350708 |
| ENSP00000285398 | ENSP00000351284 |
| ENSP00000285398 | ENSP00000355890 |
| ENSP00000285398 | ENSP00000357651 |
| ENSP00000285398 | ENSP00000359531 |
| ENSP00000285398 | ENSP00000359552 |
| ENSP00000285398 | ENSP00000362298 |
| ENSP00000285398 | ENSP00000362344 |
| ENSP00000285398 | ENSP00000367208 |
| ENSP00000285398 | ENSP00000375809 |
| ENSP00000285398 | ENSP00000381003 |

|                 |                 |
|-----------------|-----------------|
| ENSP00000285398 | ENSP00000391723 |
| ENSP00000285402 | ENSP00000323300 |
| ENSP00000285402 | ENSP00000363391 |
| ENSP00000285518 | ENSP00000294543 |
| ENSP00000285518 | ENSP00000302177 |
| ENSP00000285518 | ENSP00000354876 |
| ENSP00000285518 | ENSP00000355890 |
| ENSP00000285518 | ENSP00000357998 |
| ENSP00000285873 | ENSP00000290541 |
| ENSP00000285873 | ENSP00000297990 |
| ENSP00000285873 | ENSP00000300413 |
| ENSP00000285873 | ENSP00000301364 |
| ENSP00000285873 | ENSP00000308533 |
| ENSP00000285873 | ENSP00000310596 |
| ENSP00000285873 | ENSP00000310649 |
| ENSP00000285873 | ENSP00000315859 |
| ENSP00000285873 | ENSP00000316879 |
| ENSP00000285873 | ENSP00000320949 |
| ENSP00000285873 | ENSP00000321706 |
| ENSP00000285873 | ENSP00000322396 |
| ENSP00000285873 | ENSP00000324122 |
| ENSP00000285873 | ENSP00000329466 |
| ENSP00000285873 | ENSP00000331817 |
| ENSP00000285873 | ENSP00000339145 |
| ENSP00000285873 | ENSP00000340896 |
| ENSP00000285873 | ENSP00000342374 |
| ENSP00000285873 | ENSP00000343741 |
| ENSP00000285873 | ENSP00000356331 |
| ENSP00000285873 | ENSP00000356811 |
| ENSP00000285873 | ENSP00000358716 |
| ENSP00000285873 | ENSP00000360310 |
| ENSP00000285873 | ENSP00000361433 |
| ENSP00000285873 | ENSP00000363812 |
| ENSP00000285873 | ENSP00000366557 |
| ENSP00000285873 | ENSP00000370083 |
| ENSP00000285873 | ENSP00000370119 |
| ENSP00000285873 | ENSP00000370258 |
| ENSP00000285873 | ENSP00000372703 |
| ENSP00000285873 | ENSP00000382562 |
| ENSP00000285873 | ENSP00000393286 |
| ENSP00000285873 | ENSP00000393870 |
| ENSP00000285873 | ENSP00000400104 |
| ENSP00000285873 | ENSP00000400591 |
| ENSP00000285873 | ENSP00000402084 |
| ENSP00000285873 | ENSP00000402338 |
| ENSP00000285873 | ENSP00000402590 |

|                 |                 |
|-----------------|-----------------|
| ENSP00000285873 | ENSP00000412566 |
| ENSP00000285879 | ENSP00000300688 |
| ENSP00000285879 | ENSP00000317985 |
| ENSP00000285879 | ENSP00000355177 |
| ENSP00000285879 | ENSP00000377486 |
| ENSP00000285879 | ENSP00000377969 |
| ENSP00000285896 | ENSP00000295926 |
| ENSP00000285896 | ENSP00000296328 |
| ENSP00000285896 | ENSP00000296509 |
| ENSP00000285896 | ENSP00000302955 |
| ENSP00000285896 | ENSP00000304226 |
| ENSP00000285896 | ENSP00000307272 |
| ENSP00000285896 | ENSP00000314949 |
| ENSP00000285896 | ENSP00000317334 |
| ENSP00000285896 | ENSP00000319104 |
| ENSP00000285896 | ENSP00000320949 |
| ENSP00000285896 | ENSP00000322570 |
| ENSP00000285896 | ENSP00000330060 |
| ENSP00000285896 | ENSP00000331879 |
| ENSP00000285896 | ENSP00000339245 |
| ENSP00000285896 | ENSP00000339529 |
| ENSP00000285896 | ENSP00000350491 |
| ENSP00000285896 | ENSP00000351284 |
| ENSP00000285896 | ENSP00000351697 |
| ENSP00000285896 | ENSP00000354673 |
| ENSP00000285896 | ENSP00000356652 |
| ENSP00000285896 | ENSP00000359552 |
| ENSP00000285896 | ENSP00000360515 |
| ENSP00000285896 | ENSP00000361990 |
| ENSP00000285896 | ENSP00000366135 |
| ENSP00000285896 | ENSP00000366746 |
| ENSP00000285896 | ENSP00000368349 |
| ENSP00000285896 | ENSP00000368438 |
| ENSP00000285896 | ENSP00000369965 |
| ENSP00000285896 | ENSP00000372023 |
| ENSP00000285896 | ENSP00000374529 |
| ENSP00000285896 | ENSP00000381932 |
| ENSP00000285896 | ENSP00000383901 |
| ENSP00000285896 | ENSP00000391723 |
| ENSP00000285896 | ENSP00000396068 |
| ENSP00000285896 | ENSP00000402084 |
| ENSP00000285928 | ENSP00000304350 |
| ENSP00000285928 | ENSP00000343190 |
| ENSP00000285928 | ENSP00000347206 |
| ENSP00000285928 | ENSP00000369400 |
| ENSP00000285928 | ENSP00000379457 |

|                 |                 |
|-----------------|-----------------|
| ENSP00000285928 | ENSP00000401435 |
| ENSP00000285949 | ENSP00000310621 |
| ENSP00000285949 | ENSP00000341662 |
| ENSP00000285949 | ENSP00000348762 |
| ENSP00000285968 | ENSP00000290231 |
| ENSP00000285968 | ENSP00000291688 |
| ENSP00000285968 | ENSP00000294724 |
| ENSP00000285968 | ENSP00000300648 |
| ENSP00000285968 | ENSP00000305503 |
| ENSP00000285968 | ENSP00000308622 |
| ENSP00000285968 | ENSP00000310668 |
| ENSP00000285968 | ENSP00000316032 |
| ENSP00000285968 | ENSP00000329466 |
| ENSP00000285968 | ENSP00000352021 |
| ENSP00000285968 | ENSP00000353073 |
| ENSP00000285968 | ENSP00000355890 |
| ENSP00000285968 | ENSP00000356448 |
| ENSP00000285968 | ENSP00000360286 |
| ENSP00000285968 | ENSP00000364847 |
| ENSP00000285968 | ENSP00000371155 |
| ENSP00000285968 | ENSP00000382779 |
| ENSP00000285968 | ENSP00000402240 |
| ENSP00000286067 | ENSP00000381031 |
| ENSP00000286070 | ENSP00000300069 |
| ENSP00000286070 | ENSP00000315017 |
| ENSP00000286070 | ENSP00000334808 |
| ENSP00000286070 | ENSP00000336712 |
| ENSP00000286070 | ENSP00000349594 |
| ENSP00000286070 | ENSP00000355231 |
| ENSP00000286070 | ENSP00000360112 |
| ENSP00000286070 | ENSP00000360532 |
| ENSP00000286070 | ENSP00000386520 |
| ENSP00000286091 | ENSP00000292180 |
| ENSP00000286091 | ENSP00000299626 |
| ENSP00000286091 | ENSP00000299767 |
| ENSP00000286091 | ENSP00000318147 |
| ENSP00000286091 | ENSP00000321259 |
| ENSP00000286091 | ENSP00000327070 |
| ENSP00000286091 | ENSP00000329466 |
| ENSP00000286091 | ENSP00000331268 |
| ENSP00000286091 | ENSP00000332513 |
| ENSP00000286091 | ENSP00000340466 |
| ENSP00000286091 | ENSP00000340879 |
| ENSP00000286091 | ENSP00000349970 |
| ENSP00000286091 | ENSP00000362110 |
| ENSP00000286091 | ENSP00000366395 |

|                 |                 |
|-----------------|-----------------|
| ENSP00000286091 | ENSP00000379042 |
| ENSP00000286091 | ENSP00000380793 |
| ENSP00000286091 | ENSP00000382064 |
| ENSP00000286091 | ENSP00000401445 |
| ENSP00000286186 | ENSP00000301838 |
| ENSP00000286186 | ENSP00000312664 |
| ENSP00000286186 | ENSP00000314949 |
| ENSP00000286186 | ENSP00000318822 |
| ENSP00000286186 | ENSP00000329623 |
| ENSP00000286186 | ENSP00000343313 |
| ENSP00000286186 | ENSP00000347979 |
| ENSP00000286186 | ENSP00000356694 |
| ENSP00000286186 | ENSP00000365318 |
| ENSP00000286186 | ENSP00000384223 |
| ENSP00000286186 | ENSP00000404623 |
| ENSP00000286186 | ENSP00000419494 |
| ENSP00000286195 | ENSP00000312318 |
| ENSP00000286195 | ENSP00000340995 |
| ENSP00000286234 | ENSP00000307272 |
| ENSP00000286234 | ENSP00000349959 |
| ENSP00000286234 | ENSP00000354558 |
| ENSP00000286234 | ENSP00000359206 |
| ENSP00000286234 | ENSP00000371888 |
| ENSP00000286307 | ENSP00000319169 |
| ENSP00000286307 | ENSP00000319341 |
| ENSP00000286307 | ENSP00000370083 |
| ENSP00000286307 | ENSP00000370119 |
| ENSP00000286307 | ENSP00000412566 |
| ENSP00000286317 | ENSP00000290663 |
| ENSP00000286317 | ENSP00000290974 |
| ENSP00000286317 | ENSP00000291688 |
| ENSP00000286317 | ENSP00000292035 |
| ENSP00000286317 | ENSP00000293777 |
| ENSP00000286317 | ENSP00000294168 |
| ENSP00000286317 | ENSP00000295066 |
| ENSP00000286317 | ENSP00000296328 |
| ENSP00000286317 | ENSP00000297347 |
| ENSP00000286317 | ENSP00000299424 |
| ENSP00000286317 | ENSP00000299543 |
| ENSP00000286317 | ENSP00000299767 |
| ENSP00000286317 | ENSP00000300651 |
| ENSP00000286317 | ENSP00000301788 |
| ENSP00000286317 | ENSP00000302478 |
| ENSP00000286317 | ENSP00000303423 |
| ENSP00000286317 | ENSP00000304593 |
| ENSP00000286317 | ENSP00000306983 |

|                 |                 |
|-----------------|-----------------|
| ENSP00000286317 | ENSP00000307850 |
| ENSP00000286317 | ENSP00000312735 |
| ENSP00000286317 | ENSP00000314949 |
| ENSP00000286317 | ENSP00000320566 |
| ENSP00000286317 | ENSP00000323720 |
| ENSP00000286317 | ENSP00000323858 |
| ENSP00000286317 | ENSP00000324124 |
| ENSP00000286317 | ENSP00000325612 |
| ENSP00000286317 | ENSP00000325677 |
| ENSP00000286317 | ENSP00000326128 |
| ENSP00000286317 | ENSP00000326767 |
| ENSP00000286317 | ENSP00000326806 |
| ENSP00000286317 | ENSP00000331201 |
| ENSP00000286317 | ENSP00000331310 |
| ENSP00000286317 | ENSP00000336842 |
| ENSP00000286317 | ENSP00000337340 |
| ENSP00000286317 | ENSP00000340896 |
| ENSP00000286317 | ENSP00000342343 |
| ENSP00000286317 | ENSP00000343129 |
| ENSP00000286317 | ENSP00000343701 |
| ENSP00000286317 | ENSP00000344537 |
| ENSP00000286317 | ENSP00000347345 |
| ENSP00000286317 | ENSP00000348069 |
| ENSP00000286317 | ENSP00000352219 |
| ENSP00000286317 | ENSP00000353622 |
| ENSP00000286317 | ENSP00000355541 |
| ENSP00000286317 | ENSP00000355629 |
| ENSP00000286317 | ENSP00000355759 |
| ENSP00000286317 | ENSP00000356405 |
| ENSP00000286317 | ENSP00000357047 |
| ENSP00000286317 | ENSP00000357887 |
| ENSP00000286317 | ENSP00000357907 |
| ENSP00000286317 | ENSP00000359290 |
| ENSP00000286317 | ENSP00000359818 |
| ENSP00000286317 | ENSP00000360821 |
| ENSP00000286317 | ENSP00000361465 |
| ENSP00000286317 | ENSP00000361990 |
| ENSP00000286317 | ENSP00000362344 |
| ENSP00000286317 | ENSP00000362413 |
| ENSP00000286317 | ENSP00000362948 |
| ENSP00000286317 | ENSP00000363779 |
| ENSP00000286317 | ENSP00000365811 |
| ENSP00000286317 | ENSP00000366225 |
| ENSP00000286317 | ENSP00000366974 |
| ENSP00000286317 | ENSP00000369695 |
| ENSP00000286317 | ENSP00000373399 |



|                 |                 |
|-----------------|-----------------|
| ENSP00000286317 | ENSP00000374280 |
| ENSP00000286317 | ENSP00000374529 |
| ENSP00000286317 | ENSP00000376946 |
| ENSP00000286317 | ENSP00000381216 |
| ENSP00000286317 | ENSP00000384048 |
| ENSP00000286317 | ENSP00000386759 |
| ENSP00000286317 | ENSP00000391774 |
| ENSP00000286317 | ENSP00000392617 |
| ENSP00000286317 | ENSP00000403852 |
| ENSP00000286317 | ENSP00000418734 |
| ENSP00000286364 | ENSP00000314420 |
| ENSP00000286364 | ENSP00000340944 |
| ENSP00000286364 | ENSP00000343785 |
| ENSP00000286364 | ENSP00000357494 |
| ENSP00000286428 | ENSP00000290810 |
| ENSP00000286428 | ENSP00000295066 |
| ENSP00000286428 | ENSP00000296273 |
| ENSP00000286428 | ENSP00000296509 |
| ENSP00000286428 | ENSP00000300231 |
| ENSP00000286428 | ENSP00000300249 |
| ENSP00000286428 | ENSP00000302530 |
| ENSP00000286428 | ENSP00000303554 |
| ENSP00000286428 | ENSP00000304593 |
| ENSP00000286428 | ENSP00000305503 |
| ENSP00000286428 | ENSP00000308944 |
| ENSP00000286428 | ENSP00000312244 |
| ENSP00000286428 | ENSP00000312870 |
| ENSP00000286428 | ENSP00000314311 |
| ENSP00000286428 | ENSP00000317334 |
| ENSP00000286428 | ENSP00000318029 |
| ENSP00000286428 | ENSP00000320130 |
| ENSP00000286428 | ENSP00000321927 |
| ENSP00000286428 | ENSP00000322180 |
| ENSP00000286428 | ENSP00000325017 |
| ENSP00000286428 | ENSP00000325506 |
| ENSP00000286428 | ENSP00000328938 |
| ENSP00000286428 | ENSP00000330836 |
| ENSP00000286428 | ENSP00000331310 |
| ENSP00000286428 | ENSP00000334188 |
| ENSP00000286428 | ENSP00000334675 |
| ENSP00000286428 | ENSP00000340019 |
| ENSP00000286428 | ENSP00000347602 |
| ENSP00000286428 | ENSP00000347719 |
| ENSP00000286428 | ENSP00000348551 |
| ENSP00000286428 | ENSP00000348565 |
| ENSP00000286428 | ENSP00000348602 |

|                 |                 |
|-----------------|-----------------|
| ENSP00000286428 | ENSP00000351284 |
| ENSP00000286428 | ENSP00000351665 |
| ENSP00000286428 | ENSP00000353622 |
| ENSP00000286428 | ENSP00000353793 |
| ENSP00000286428 | ENSP00000354158 |
| ENSP00000286428 | ENSP00000354340 |
| ENSP00000286428 | ENSP00000355205 |
| ENSP00000286428 | ENSP00000355560 |
| ENSP00000286428 | ENSP00000355922 |
| ENSP00000286428 | ENSP00000356989 |
| ENSP00000286428 | ENSP00000357643 |
| ENSP00000286428 | ENSP00000357887 |
| ENSP00000286428 | ENSP00000360270 |
| ENSP00000286428 | ENSP00000360473 |
| ENSP00000286428 | ENSP00000360515 |
| ENSP00000286428 | ENSP00000361845 |
| ENSP00000286428 | ENSP00000362441 |
| ENSP00000286428 | ENSP00000363313 |
| ENSP00000286428 | ENSP00000363734 |
| ENSP00000286428 | ENSP00000363779 |
| ENSP00000286428 | ENSP00000369411 |
| ENSP00000286428 | ENSP00000369736 |
| ENSP00000286428 | ENSP00000369860 |
| ENSP00000286428 | ENSP00000370151 |
| ENSP00000286428 | ENSP00000372694 |
| ENSP00000286428 | ENSP00000373399 |
| ENSP00000286428 | ENSP00000374213 |
| ENSP00000286428 | ENSP00000374566 |
| ENSP00000286428 | ENSP00000376268 |
| ENSP00000286428 | ENSP00000376946 |
| ENSP00000286428 | ENSP00000377793 |
| ENSP00000286428 | ENSP00000381891 |
| ENSP00000286428 | ENSP00000382562 |
| ENSP00000286428 | ENSP00000412319 |
| ENSP00000286428 | ENSP00000412922 |
| ENSP00000286428 | ENSP00000415678 |
| ENSP00000286428 | ENSP00000417229 |
| ENSP00000286428 | ENSP00000417763 |
| ENSP00000286448 | ENSP00000294179 |
| ENSP00000286448 | ENSP00000304292 |
| ENSP00000286448 | ENSP00000305255 |
| ENSP00000286448 | ENSP00000305810 |
| ENSP00000286448 | ENSP00000309457 |
| ENSP00000286448 | ENSP00000310521 |
| ENSP00000286448 | ENSP00000312735 |
| ENSP00000286448 | ENSP00000317714 |

|                 |                 |
|-----------------|-----------------|
| ENSP00000286448 | ENSP00000320885 |
| ENSP00000286448 | ENSP00000324628 |
| ENSP00000286448 | ENSP00000325002 |
| ENSP00000286448 | ENSP00000327650 |
| ENSP00000286448 | ENSP00000330320 |
| ENSP00000286448 | ENSP00000344055 |
| ENSP00000286448 | ENSP00000345656 |
| ENSP00000286448 | ENSP00000347408 |
| ENSP00000286448 | ENSP00000349887 |
| ENSP00000286448 | ENSP00000350512 |
| ENSP00000286448 | ENSP00000353073 |
| ENSP00000286448 | ENSP00000356405 |
| ENSP00000286448 | ENSP00000357887 |
| ENSP00000286448 | ENSP00000360183 |
| ENSP00000286448 | ENSP00000366225 |
| ENSP00000286448 | ENSP00000369810 |
| ENSP00000286448 | ENSP00000374529 |
| ENSP00000286448 | ENSP00000381293 |
| ENSP00000286448 | ENSP00000390783 |
| ENSP00000286448 | ENSP00000397441 |
| ENSP00000286448 | ENSP00000417748 |
| ENSP00000286448 | ENSP00000418661 |
| ENSP00000286523 | ENSP00000361705 |
| ENSP00000286523 | ENSP00000365439 |
| ENSP00000286523 | ENSP00000380921 |
| ENSP00000286523 | ENSP00000417281 |
| ENSP00000286621 | ENSP00000305976 |
| ENSP00000286621 | ENSP00000315931 |
| ENSP00000286621 | ENSP00000327650 |
| ENSP00000286621 | ENSP00000333019 |
| ENSP00000286621 | ENSP00000340088 |
| ENSP00000286621 | ENSP00000354558 |
| ENSP00000286621 | ENSP00000356290 |
| ENSP00000286621 | ENSP00000359976 |
| ENSP00000286621 | ENSP00000361965 |
| ENSP00000286621 | ENSP00000362041 |
| ENSP00000286621 | ENSP00000364320 |
| ENSP00000286621 | ENSP00000367615 |
| ENSP00000286621 | ENSP00000369519 |
| ENSP00000286621 | ENSP00000377617 |
| ENSP00000286621 | ENSP00000394394 |
| ENSP00000286621 | ENSP00000419851 |
| ENSP00000286627 | ENSP00000295897 |
| ENSP00000286627 | ENSP00000295987 |
| ENSP00000286627 | ENSP00000300231 |
| ENSP00000286627 | ENSP00000301843 |

|                 |                 |
|-----------------|-----------------|
| ENSP00000286627 | ENSP00000341189 |
| ENSP00000286719 | ENSP00000296802 |
| ENSP00000286719 | ENSP00000312224 |
| ENSP00000286719 | ENSP00000317872 |
| ENSP00000286719 | ENSP00000336752 |
| ENSP00000286719 | ENSP00000339353 |
| ENSP00000286719 | ENSP00000343392 |
| ENSP00000286719 | ENSP00000345096 |
| ENSP00000286719 | ENSP00000348784 |
| ENSP00000286719 | ENSP00000359049 |
| ENSP00000286719 | ENSP00000361141 |
| ENSP00000286719 | ENSP00000366672 |
| ENSP00000286719 | ENSP00000367197 |
| ENSP00000286719 | ENSP00000417963 |
| ENSP00000286758 | ENSP00000300098 |
| ENSP00000286800 | ENSP00000325863 |
| ENSP00000286800 | ENSP00000347232 |
| ENSP00000286800 | ENSP00000348632 |
| ENSP00000286800 | ENSP00000350283 |
| ENSP00000286800 | ENSP00000355865 |
| ENSP00000286800 | ENSP00000369497 |
| ENSP00000286800 | ENSP00000377492 |
| ENSP00000286835 | ENSP00000294119 |
| ENSP00000286835 | ENSP00000296328 |
| ENSP00000286835 | ENSP00000296783 |
| ENSP00000286835 | ENSP00000298281 |
| ENSP00000286835 | ENSP00000299138 |
| ENSP00000286835 | ENSP00000299543 |
| ENSP00000286835 | ENSP00000301788 |
| ENSP00000286835 | ENSP00000302768 |
| ENSP00000286835 | ENSP00000305255 |
| ENSP00000286835 | ENSP00000305459 |
| ENSP00000286835 | ENSP00000307387 |
| ENSP00000286835 | ENSP00000308496 |
| ENSP00000286835 | ENSP00000310621 |
| ENSP00000286835 | ENSP00000312735 |
| ENSP00000286835 | ENSP00000314499 |
| ENSP00000286835 | ENSP00000314615 |
| ENSP00000286835 | ENSP00000314949 |
| ENSP00000286835 | ENSP00000316879 |
| ENSP00000286835 | ENSP00000320566 |
| ENSP00000286835 | ENSP00000323046 |
| ENSP00000286835 | ENSP00000326806 |
| ENSP00000286835 | ENSP00000333019 |
| ENSP00000286835 | ENSP00000333376 |
| ENSP00000286835 | ENSP00000337475 |

|                 |                 |
|-----------------|-----------------|
| ENSP00000286835 | ENSP00000337839 |
| ENSP00000286835 | ENSP00000339845 |
| ENSP00000286835 | ENSP00000340271 |
| ENSP00000286835 | ENSP00000340281 |
| ENSP00000286835 | ENSP00000340954 |
| ENSP00000286835 | ENSP00000343745 |
| ENSP00000286835 | ENSP00000345656 |
| ENSP00000286835 | ENSP00000347345 |
| ENSP00000286835 | ENSP00000347408 |
| ENSP00000286835 | ENSP00000349877 |
| ENSP00000286835 | ENSP00000351015 |
| ENSP00000286835 | ENSP00000351524 |
| ENSP00000286835 | ENSP00000355231 |
| ENSP00000286835 | ENSP00000356405 |
| ENSP00000286835 | ENSP00000359939 |
| ENSP00000286835 | ENSP00000360270 |
| ENSP00000286835 | ENSP00000360327 |
| ENSP00000286835 | ENSP00000360817 |
| ENSP00000286835 | ENSP00000361433 |
| ENSP00000286835 | ENSP00000361465 |
| ENSP00000286835 | ENSP00000361845 |
| ENSP00000286835 | ENSP00000362900 |
| ENSP00000286835 | ENSP00000364289 |
| ENSP00000286835 | ENSP00000364929 |
| ENSP00000286835 | ENSP00000366135 |
| ENSP00000286835 | ENSP00000368801 |
| ENSP00000286835 | ENSP00000368824 |
| ENSP00000286835 | ENSP00000368984 |
| ENSP00000286835 | ENSP00000371236 |
| ENSP00000286835 | ENSP00000372697 |
| ENSP00000286835 | ENSP00000374280 |
| ENSP00000286835 | ENSP00000389934 |
| ENSP00000286835 | ENSP00000390831 |
| ENSP00000286835 | ENSP00000391197 |
| ENSP00000286835 | ENSP00000397441 |
| ENSP00000286835 | ENSP00000402240 |
| ENSP00000286835 | ENSP00000403852 |
| ENSP00000286835 | ENSP00000404016 |
| ENSP00000286835 | ENSP00000406988 |
| ENSP00000286835 | ENSP00000409952 |
| ENSP00000286835 | ENSP00000419851 |
| ENSP00000287022 | ENSP00000297564 |
| ENSP00000287022 | ENSP00000307786 |
| ENSP00000287022 | ENSP00000309565 |
| ENSP00000287022 | ENSP00000317159 |
| ENSP00000287022 | ENSP00000317780 |

|                 |                 |
|-----------------|-----------------|
| ENSP00000287022 | ENSP00000332887 |
| ENSP00000287022 | ENSP00000336927 |
| ENSP00000287022 | ENSP00000354499 |
| ENSP00000287022 | ENSP00000354554 |
| ENSP00000287022 | ENSP00000354876 |
| ENSP00000287022 | ENSP00000354982 |
| ENSP00000287022 | ENSP00000355572 |
| ENSP00000287022 | ENSP00000367934 |
| ENSP00000287022 | ENSP00000387262 |
| ENSP00000287025 | ENSP00000292478 |
| ENSP00000287025 | ENSP00000299259 |
| ENSP00000287025 | ENSP00000301585 |
| ENSP00000287038 | ENSP00000294189 |
| ENSP00000287038 | ENSP00000296411 |
| ENSP00000287038 | ENSP00000296802 |
| ENSP00000287038 | ENSP00000297990 |
| ENSP00000287038 | ENSP00000298283 |
| ENSP00000287038 | ENSP00000300151 |
| ENSP00000287038 | ENSP00000302886 |
| ENSP00000287038 | ENSP00000302896 |
| ENSP00000287038 | ENSP00000306548 |
| ENSP00000287038 | ENSP00000307889 |
| ENSP00000287038 | ENSP00000308897 |
| ENSP00000287038 | ENSP00000309334 |
| ENSP00000287038 | ENSP00000309830 |
| ENSP00000287038 | ENSP00000311028 |
| ENSP00000287038 | ENSP00000311430 |
| ENSP00000287038 | ENSP00000312664 |
| ENSP00000287038 | ENSP00000317376 |
| ENSP00000287038 | ENSP00000318646 |
| ENSP00000287038 | ENSP00000322419 |
| ENSP00000287038 | ENSP00000325312 |
| ENSP00000287038 | ENSP00000326981 |
| ENSP00000287038 | ENSP00000329466 |
| ENSP00000287038 | ENSP00000338573 |
| ENSP00000287038 | ENSP00000338862 |
| ENSP00000287038 | ENSP00000339095 |
| ENSP00000287038 | ENSP00000339145 |
| ENSP00000287038 | ENSP00000339795 |
| ENSP00000287038 | ENSP00000345156 |
| ENSP00000287038 | ENSP00000346015 |
| ENSP00000287038 | ENSP00000346022 |
| ENSP00000287038 | ENSP00000346027 |
| ENSP00000287038 | ENSP00000346037 |
| ENSP00000287038 | ENSP00000346050 |
| ENSP00000287038 | ENSP00000346088 |

|                 |                 |
|-----------------|-----------------|
| ENSP00000287038 | ENSP00000346725 |
| ENSP00000287038 | ENSP00000347087 |
| ENSP00000287038 | ENSP00000354040 |
| ENSP00000287038 | ENSP00000354525 |
| ENSP00000287038 | ENSP00000354739 |
| ENSP00000287038 | ENSP00000355759 |
| ENSP00000287038 | ENSP00000355996 |
| ENSP00000287038 | ENSP00000359345 |
| ENSP00000287038 | ENSP00000361076 |
| ENSP00000287038 | ENSP00000362153 |
| ENSP00000287038 | ENSP00000362744 |
| ENSP00000287038 | ENSP00000363018 |
| ENSP00000287038 | ENSP00000363559 |
| ENSP00000287038 | ENSP00000363676 |
| ENSP00000287038 | ENSP00000364289 |
| ENSP00000287038 | ENSP00000364320 |
| ENSP00000287038 | ENSP00000365806 |
| ENSP00000287038 | ENSP00000369757 |
| ENSP00000287038 | ENSP00000370589 |
| ENSP00000287038 | ENSP00000372199 |
| ENSP00000287038 | ENSP00000373090 |
| ENSP00000287038 | ENSP00000373404 |
| ENSP00000287038 | ENSP00000375730 |
| ENSP00000287038 | ENSP00000377640 |
| ENSP00000287038 | ENSP00000377865 |
| ENSP00000287038 | ENSP00000378160 |
| ENSP00000287038 | ENSP00000379607 |
| ENSP00000287038 | ENSP00000379888 |
| ENSP00000287038 | ENSP00000380156 |
| ENSP00000287038 | ENSP00000380982 |
| ENSP00000287038 | ENSP00000386717 |
| ENSP00000287038 | ENSP00000389103 |
| ENSP00000287038 | ENSP00000393393 |
| ENSP00000287038 | ENSP00000394290 |
| ENSP00000287038 | ENSP00000401371 |
| ENSP00000287038 | ENSP00000402338 |
| ENSP00000287038 | ENSP00000403576 |
| ENSP00000287038 | ENSP00000409074 |
| ENSP00000287038 | ENSP00000409367 |
| ENSP00000287038 | ENSP00000411162 |
| ENSP00000287038 | ENSP00000414321 |
| ENSP00000287038 | ENSP00000417970 |
| ENSP00000287078 | ENSP00000360569 |
| ENSP00000287218 | ENSP00000373363 |
| ENSP00000287239 | ENSP00000296755 |
| ENSP00000287239 | ENSP00000297338 |

|                 |                 |
|-----------------|-----------------|
| ENSP00000287239 | ENSP00000297431 |
| ENSP00000287239 | ENSP00000307208 |
| ENSP00000287239 | ENSP00000311513 |
| ENSP00000287239 | ENSP00000319169 |
| ENSP00000287239 | ENSP00000320485 |
| ENSP00000287239 | ENSP00000338093 |
| ENSP00000287239 | ENSP00000343392 |
| ENSP00000287239 | ENSP00000349213 |
| ENSP00000287239 | ENSP00000351284 |
| ENSP00000287239 | ENSP00000352514 |
| ENSP00000287239 | ENSP00000355388 |
| ENSP00000287239 | ENSP00000356595 |
| ENSP00000287239 | ENSP00000365877 |
| ENSP00000287239 | ENSP00000366974 |
| ENSP00000287239 | ENSP00000381657 |
| ENSP00000287239 | ENSP00000386759 |
| ENSP00000287295 | ENSP00000290649 |
| ENSP00000287295 | ENSP00000296084 |
| ENSP00000287295 | ENSP00000300181 |
| ENSP00000287295 | ENSP00000301585 |
| ENSP00000287295 | ENSP00000305906 |
| ENSP00000287295 | ENSP00000311766 |
| ENSP00000287295 | ENSP00000317327 |
| ENSP00000287295 | ENSP00000322218 |
| ENSP00000287295 | ENSP00000337797 |
| ENSP00000287295 | ENSP00000341159 |
| ENSP00000287295 | ENSP00000341213 |
| ENSP00000287295 | ENSP00000341268 |
| ENSP00000287295 | ENSP00000344456 |
| ENSP00000287295 | ENSP00000346155 |
| ENSP00000287295 | ENSP00000347314 |
| ENSP00000287295 | ENSP00000347948 |
| ENSP00000287295 | ENSP00000348577 |
| ENSP00000287295 | ENSP00000351908 |
| ENSP00000287295 | ENSP00000352219 |
| ENSP00000287295 | ENSP00000362751 |
| ENSP00000287295 | ENSP00000365435 |
| ENSP00000287295 | ENSP00000369860 |
| ENSP00000287295 | ENSP00000369862 |
| ENSP00000287295 | ENSP00000379607 |
| ENSP00000287295 | ENSP00000381698 |
| ENSP00000287295 | ENSP00000386239 |
| ENSP00000287295 | ENSP00000411584 |
| ENSP00000287322 | ENSP00000329623 |
| ENSP00000287322 | ENSP00000379607 |
| ENSP00000287437 | ENSP00000296257 |



|                 |                 |
|-----------------|-----------------|
| ENSP00000287437 | ENSP00000298139 |
| ENSP00000287437 | ENSP00000322242 |
| ENSP00000287437 | ENSP00000323439 |
| ENSP00000287437 | ENSP00000327197 |
| ENSP00000287437 | ENSP00000334474 |
| ENSP00000287437 | ENSP00000343741 |
| ENSP00000287437 | ENSP00000347232 |
| ENSP00000287437 | ENSP00000347836 |
| ENSP00000287437 | ENSP00000352257 |
| ENSP00000287437 | ENSP00000354522 |
| ENSP00000287437 | ENSP00000354742 |
| ENSP00000287437 | ENSP00000354957 |
| ENSP00000287437 | ENSP00000355077 |
| ENSP00000287437 | ENSP00000356437 |
| ENSP00000287437 | ENSP00000356448 |
| ENSP00000287437 | ENSP00000358019 |
| ENSP00000287437 | ENSP00000364270 |
| ENSP00000287437 | ENSP00000365588 |
| ENSP00000287437 | ENSP00000367406 |
| ENSP00000287437 | ENSP00000368438 |
| ENSP00000287437 | ENSP00000369335 |
| ENSP00000287437 | ENSP00000370151 |
| ENSP00000287437 | ENSP00000371475 |
| ENSP00000287437 | ENSP00000373060 |
| ENSP00000287437 | ENSP00000384048 |
| ENSP00000287437 | ENSP00000387429 |
| ENSP00000287437 | ENSP00000394791 |
| ENSP00000287437 | ENSP00000396484 |
| ENSP00000287437 | ENSP00000396704 |
| ENSP00000287437 | ENSP00000404318 |
| ENSP00000287437 | ENSP00000409167 |
| ENSP00000287437 | ENSP00000415212 |
| ENSP00000287437 | ENSP00000416511 |
| ENSP00000287482 | ENSP00000313034 |
| ENSP00000287482 | ENSP00000362021 |
| ENSP00000287482 | ENSP00000371308 |
| ENSP00000287598 | ENSP00000296215 |
| ENSP00000287598 | ENSP00000296273 |
| ENSP00000287598 | ENSP00000296509 |
| ENSP00000287598 | ENSP00000297338 |
| ENSP00000287598 | ENSP00000298532 |
| ENSP00000287598 | ENSP00000299381 |
| ENSP00000287598 | ENSP00000300249 |
| ENSP00000287598 | ENSP00000300584 |
| ENSP00000287598 | ENSP00000301019 |
| ENSP00000287598 | ENSP00000301332 |

|                 |                 |
|-----------------|-----------------|
| ENSP00000287598 | ENSP00000302530 |
| ENSP00000287598 | ENSP00000304593 |
| ENSP00000287598 | ENSP00000307208 |
| ENSP00000287598 | ENSP00000311873 |
| ENSP00000287598 | ENSP00000313171 |
| ENSP00000287598 | ENSP00000313243 |
| ENSP00000287598 | ENSP00000313420 |
| ENSP00000287598 | ENSP00000314004 |
| ENSP00000287598 | ENSP00000315659 |
| ENSP00000287598 | ENSP00000315791 |
| ENSP00000287598 | ENSP00000318775 |
| ENSP00000287598 | ENSP00000318977 |
| ENSP00000287598 | ENSP00000322180 |
| ENSP00000287598 | ENSP00000322579 |
| ENSP00000287598 | ENSP00000323439 |
| ENSP00000287598 | ENSP00000324729 |
| ENSP00000287598 | ENSP00000325377 |
| ENSP00000287598 | ENSP00000325863 |
| ENSP00000287598 | ENSP00000329933 |
| ENSP00000287598 | ENSP00000330408 |
| ENSP00000287598 | ENSP00000331152 |
| ENSP00000287598 | ENSP00000331310 |
| ENSP00000287598 | ENSP00000334188 |
| ENSP00000287598 | ENSP00000335463 |
| ENSP00000287598 | ENSP00000336842 |
| ENSP00000287598 | ENSP00000339109 |
| ENSP00000287598 | ENSP00000341382 |
| ENSP00000287598 | ENSP00000343526 |
| ENSP00000287598 | ENSP00000343535 |
| ENSP00000287598 | ENSP00000343741 |
| ENSP00000287598 | ENSP00000346566 |
| ENSP00000287598 | ENSP00000347076 |
| ENSP00000287598 | ENSP00000347719 |
| ENSP00000287598 | ENSP00000347978 |
| ENSP00000287598 | ENSP00000348010 |
| ENSP00000287598 | ENSP00000348554 |
| ENSP00000287598 | ENSP00000350199 |
| ENSP00000287598 | ENSP00000351284 |
| ENSP00000287598 | ENSP00000351665 |
| ENSP00000287598 | ENSP00000352572 |
| ENSP00000287598 | ENSP00000353332 |
| ENSP00000287598 | ENSP00000353793 |
| ENSP00000287598 | ENSP00000354522 |
| ENSP00000287598 | ENSP00000354558 |
| ENSP00000287598 | ENSP00000354720 |
| ENSP00000287598 | ENSP00000354957 |

|                 |                 |
|-----------------|-----------------|
| ENSP00000287598 | ENSP00000355205 |
| ENSP00000287598 | ENSP00000355388 |
| ENSP00000287598 | ENSP00000355560 |
| ENSP00000287598 | ENSP00000355759 |
| ENSP00000287598 | ENSP00000355922 |
| ENSP00000287598 | ENSP00000355944 |
| ENSP00000287598 | ENSP00000356319 |
| ENSP00000287598 | ENSP00000356989 |
| ENSP00000287598 | ENSP00000357440 |
| ENSP00000287598 | ENSP00000357651 |
| ENSP00000287598 | ENSP00000357887 |
| ENSP00000287598 | ENSP00000357907 |
| ENSP00000287598 | ENSP00000359518 |
| ENSP00000287598 | ENSP00000360532 |
| ENSP00000287598 | ENSP00000360621 |
| ENSP00000287598 | ENSP00000363055 |
| ENSP00000287598 | ENSP00000363322 |
| ENSP00000287598 | ENSP00000364119 |
| ENSP00000287598 | ENSP00000365025 |
| ENSP00000287598 | ENSP00000367034 |
| ENSP00000287598 | ENSP00000368438 |
| ENSP00000287598 | ENSP00000368976 |
| ENSP00000287598 | ENSP00000369411 |
| ENSP00000287598 | ENSP00000369497 |
| ENSP00000287598 | ENSP00000370151 |
| ENSP00000287598 | ENSP00000370557 |
| ENSP00000287598 | ENSP00000370589 |
| ENSP00000287598 | ENSP00000374213 |
| ENSP00000287598 | ENSP00000374566 |
| ENSP00000287598 | ENSP00000375809 |
| ENSP00000287598 | ENSP00000375986 |
| ENSP00000287598 | ENSP00000378165 |
| ENSP00000287598 | ENSP00000378350 |
| ENSP00000287598 | ENSP00000382177 |
| ENSP00000287598 | ENSP00000382271 |
| ENSP00000287598 | ENSP00000382562 |
| ENSP00000287598 | ENSP00000386759 |
| ENSP00000287598 | ENSP00000394394 |
| ENSP00000287598 | ENSP00000402084 |
| ENSP00000287598 | ENSP00000408910 |
| ENSP00000287600 | ENSP00000367766 |
| ENSP00000287600 | ENSP00000377769 |
| ENSP00000287647 | ENSP00000289081 |
| ENSP00000287647 | ENSP00000304133 |
| ENSP00000287647 | ENSP00000307491 |
| ENSP00000287647 | ENSP00000310842 |

|                 |                 |
|-----------------|-----------------|
| ENSP00000287647 | ENSP00000311579 |
| ENSP00000287647 | ENSP00000325863 |
| ENSP00000287647 | ENSP00000326819 |
| ENSP00000287647 | ENSP00000337088 |
| ENSP00000287647 | ENSP00000339527 |
| ENSP00000287647 | ENSP00000343526 |
| ENSP00000287647 | ENSP00000343741 |
| ENSP00000287647 | ENSP00000346453 |
| ENSP00000287647 | ENSP00000347232 |
| ENSP00000287647 | ENSP00000350283 |
| ENSP00000287647 | ENSP00000354497 |
| ENSP00000287647 | ENSP00000355185 |
| ENSP00000287647 | ENSP00000358576 |
| ENSP00000287647 | ENSP00000360532 |
| ENSP00000287647 | ENSP00000367910 |
| ENSP00000287647 | ENSP00000368438 |
| ENSP00000287647 | ENSP00000369497 |
| ENSP00000287647 | ENSP00000372316 |
| ENSP00000287647 | ENSP00000373060 |
| ENSP00000287647 | ENSP00000381891 |
| ENSP00000287647 | ENSP00000385021 |
| ENSP00000287647 | ENSP00000386165 |
| ENSP00000287647 | ENSP00000409167 |
| ENSP00000287652 | ENSP00000340305 |
| ENSP00000287652 | ENSP00000348107 |
| ENSP00000287652 | ENSP00000348554 |
| ENSP00000287652 | ENSP00000368984 |
| ENSP00000287652 | ENSP00000396704 |
| ENSP00000287675 | ENSP00000290429 |
| ENSP00000287675 | ENSP00000309595 |
| ENSP00000287675 | ENSP00000312370 |
| ENSP00000287675 | ENSP00000337445 |
| ENSP00000287675 | ENSP00000345341 |
| ENSP00000287675 | ENSP00000346453 |
| ENSP00000287675 | ENSP00000361686 |
| ENSP00000287706 | ENSP00000382177 |
| ENSP00000287713 | ENSP00000340820 |
| ENSP00000287713 | ENSP00000353375 |
| ENSP00000287713 | ENSP00000353508 |
| ENSP00000287713 | ENSP00000370150 |
| ENSP00000287820 | ENSP00000294753 |
| ENSP00000287820 | ENSP00000300651 |
| ENSP00000287820 | ENSP00000304945 |
| ENSP00000287820 | ENSP00000305422 |
| ENSP00000287820 | ENSP00000307604 |
| ENSP00000287820 | ENSP00000320949 |

|                 |                 |
|-----------------|-----------------|
| ENSP00000287820 | ENSP00000322457 |
| ENSP00000287820 | ENSP00000324422 |
| ENSP00000287820 | ENSP00000327213 |
| ENSP00000287820 | ENSP00000329357 |
| ENSP00000287820 | ENSP00000337088 |
| ENSP00000287820 | ENSP00000340896 |
| ENSP00000287820 | ENSP00000348128 |
| ENSP00000287820 | ENSP00000348551 |
| ENSP00000287820 | ENSP00000348610 |
| ENSP00000287820 | ENSP00000349803 |
| ENSP00000287820 | ENSP00000350894 |
| ENSP00000287820 | ENSP00000351894 |
| ENSP00000287820 | ENSP00000357965 |
| ENSP00000287820 | ENSP00000358778 |
| ENSP00000287820 | ENSP00000363804 |
| ENSP00000287820 | ENSP00000378286 |
| ENSP00000287820 | ENSP00000378503 |
| ENSP00000287820 | ENSP00000381098 |
| ENSP00000287820 | ENSP00000382204 |
| ENSP00000287820 | ENSP00000392028 |
| ENSP00000287820 | ENSP00000395535 |
| ENSP00000287820 | ENSP00000399968 |
| ENSP00000287820 | ENSP00000417281 |
| ENSP00000287859 | ENSP00000308179 |
| ENSP00000287878 | ENSP00000287936 |
| ENSP00000287878 | ENSP00000288532 |
| ENSP00000287878 | ENSP00000294189 |
| ENSP00000287878 | ENSP00000296755 |
| ENSP00000287878 | ENSP00000298281 |
| ENSP00000287878 | ENSP00000300231 |
| ENSP00000287878 | ENSP00000304704 |
| ENSP00000287878 | ENSP00000307525 |
| ENSP00000287878 | ENSP00000307889 |
| ENSP00000287878 | ENSP00000311028 |
| ENSP00000287878 | ENSP00000313490 |
| ENSP00000287878 | ENSP00000340466 |
| ENSP00000287878 | ENSP00000340954 |
| ENSP00000287878 | ENSP00000345096 |
| ENSP00000287878 | ENSP00000348554 |
| ENSP00000287878 | ENSP00000358140 |
| ENSP00000287878 | ENSP00000359345 |
| ENSP00000287878 | ENSP00000361310 |
| ENSP00000287878 | ENSP00000362413 |
| ENSP00000287878 | ENSP00000363308 |
| ENSP00000287878 | ENSP00000363676 |
| ENSP00000287878 | ENSP00000367637 |

|                 |                 |
|-----------------|-----------------|
| ENSP00000287878 | ENSP00000369456 |
| ENSP00000287878 | ENSP00000377446 |
| ENSP00000287878 | ENSP00000379093 |
| ENSP00000287878 | ENSP00000394869 |
| ENSP00000287878 | ENSP00000419851 |
| ENSP00000287936 | ENSP00000290649 |
| ENSP00000287936 | ENSP00000304051 |
| ENSP00000287936 | ENSP00000309141 |
| ENSP00000287936 | ENSP00000311766 |
| ENSP00000287936 | ENSP00000312458 |
| ENSP00000287936 | ENSP00000317087 |
| ENSP00000287936 | ENSP00000320604 |
| ENSP00000287936 | ENSP00000325690 |
| ENSP00000287936 | ENSP00000333950 |
| ENSP00000287936 | ENSP00000337053 |
| ENSP00000287936 | ENSP00000344741 |
| ENSP00000287936 | ENSP00000345096 |
| ENSP00000287936 | ENSP00000346142 |
| ENSP00000287936 | ENSP00000347836 |
| ENSP00000287936 | ENSP00000349078 |
| ENSP00000287936 | ENSP00000350012 |
| ENSP00000287936 | ENSP00000352219 |
| ENSP00000287936 | ENSP00000352738 |
| ENSP00000287936 | ENSP00000354522 |
| ENSP00000287936 | ENSP00000358033 |
| ENSP00000287936 | ENSP00000360918 |
| ENSP00000287936 | ENSP00000365388 |
| ENSP00000287936 | ENSP00000366395 |
| ENSP00000287936 | ENSP00000376268 |
| ENSP00000287936 | ENSP00000381302 |
| ENSP00000288065 | ENSP00000381891 |
| ENSP00000288087 | ENSP00000346437 |
| ENSP00000288087 | ENSP00000347538 |
| ENSP00000288167 | ENSP00000295981 |
| ENSP00000288167 | ENSP00000328111 |
| ENSP00000288167 | ENSP00000332995 |
| ENSP00000288167 | ENSP00000345984 |
| ENSP00000288167 | ENSP00000368438 |
| ENSP00000288199 | ENSP00000288840 |
| ENSP00000288199 | ENSP00000296161 |
| ENSP00000288199 | ENSP00000300417 |
| ENSP00000288199 | ENSP00000302120 |
| ENSP00000288199 | ENSP00000312735 |
| ENSP00000288199 | ENSP00000324124 |
| ENSP00000288199 | ENSP00000340305 |
| ENSP00000288199 | ENSP00000367797 |

|                 |                 |
|-----------------|-----------------|
| ENSP00000288199 | ENSP00000403852 |
| ENSP00000288266 | ENSP00000314615 |
| ENSP00000288266 | ENSP00000331310 |
| ENSP00000288266 | ENSP00000333833 |
| ENSP00000288266 | ENSP00000342793 |
| ENSP00000288266 | ENSP00000344456 |
| ENSP00000288266 | ENSP00000360183 |
| ENSP00000288266 | ENSP00000362592 |
| ENSP00000288422 | ENSP00000317332 |
| ENSP00000288422 | ENSP00000342056 |
| ENSP00000288422 | ENSP00000348632 |
| ENSP00000288422 | ENSP00000355231 |
| ENSP00000288422 | ENSP00000358335 |
| ENSP00000288422 | ENSP00000363680 |
| ENSP00000288502 | ENSP00000295025 |
| ENSP00000288532 | ENSP00000290810 |
| ENSP00000288532 | ENSP00000310547 |
| ENSP00000288532 | ENSP00000338413 |
| ENSP00000288532 | ENSP00000345096 |
| ENSP00000288532 | ENSP00000346437 |
| ENSP00000288532 | ENSP00000348565 |
| ENSP00000288532 | ENSP00000354340 |
| ENSP00000288532 | ENSP00000355739 |
| ENSP00000288532 | ENSP00000359385 |
| ENSP00000288532 | ENSP00000360286 |
| ENSP00000288532 | ENSP00000367408 |
| ENSP00000288602 | ENSP00000297185 |
| ENSP00000288602 | ENSP00000303315 |
| ENSP00000288602 | ENSP00000306124 |
| ENSP00000288602 | ENSP00000309871 |
| ENSP00000288602 | ENSP00000312326 |
| ENSP00000288602 | ENSP00000318115 |
| ENSP00000288602 | ENSP00000336740 |
| ENSP00000288602 | ENSP00000339952 |
| ENSP00000288602 | ENSP00000340944 |
| ENSP00000288602 | ENSP00000342300 |
| ENSP00000288602 | ENSP00000343785 |
| ENSP00000288602 | ENSP00000343847 |
| ENSP00000288602 | ENSP00000347294 |
| ENSP00000288602 | ENSP00000353344 |
| ENSP00000288602 | ENSP00000356595 |
| ENSP00000288602 | ENSP00000358770 |
| ENSP00000288602 | ENSP00000359474 |
| ENSP00000288602 | ENSP00000363812 |
| ENSP00000288602 | ENSP00000364912 |
| ENSP00000288602 | ENSP00000368824 |

|                 |                 |
|-----------------|-----------------|
| ENSP00000288602 | ENSP00000372703 |
| ENSP00000288602 | ENSP00000380349 |
| ENSP00000288602 | ENSP00000382423 |
| ENSP00000288602 | ENSP00000393286 |
| ENSP00000288602 | ENSP00000393870 |
| ENSP00000288602 | ENSP00000400104 |
| ENSP00000288602 | ENSP00000402590 |
| ENSP00000288774 | ENSP00000295030 |
| ENSP00000288774 | ENSP00000296257 |
| ENSP00000288774 | ENSP00000298139 |
| ENSP00000288774 | ENSP00000299138 |
| ENSP00000288774 | ENSP00000302160 |
| ENSP00000288774 | ENSP00000303511 |
| ENSP00000288774 | ENSP00000307853 |
| ENSP00000288774 | ENSP00000309141 |
| ENSP00000288774 | ENSP00000313171 |
| ENSP00000288774 | ENSP00000313881 |
| ENSP00000288774 | ENSP00000317087 |
| ENSP00000288774 | ENSP00000317636 |
| ENSP00000288774 | ENSP00000321636 |
| ENSP00000288774 | ENSP00000325677 |
| ENSP00000288774 | ENSP00000325863 |
| ENSP00000288774 | ENSP00000327197 |
| ENSP00000288774 | ENSP00000329933 |
| ENSP00000288774 | ENSP00000330343 |
| ENSP00000288774 | ENSP00000331310 |
| ENSP00000288774 | ENSP00000334188 |
| ENSP00000288774 | ENSP00000334474 |
| ENSP00000288774 | ENSP00000337353 |
| ENSP00000288774 | ENSP00000347232 |
| ENSP00000288774 | ENSP00000347836 |
| ENSP00000288774 | ENSP00000349016 |
| ENSP00000288774 | ENSP00000349543 |
| ENSP00000288774 | ENSP00000351284 |
| ENSP00000288774 | ENSP00000356405 |
| ENSP00000288774 | ENSP00000356989 |
| ENSP00000288774 | ENSP00000357051 |
| ENSP00000288774 | ENSP00000358312 |
| ENSP00000288774 | ENSP00000358862 |
| ENSP00000288774 | ENSP00000366135 |
| ENSP00000288774 | ENSP00000369335 |
| ENSP00000288774 | ENSP00000377655 |
| ENSP00000288774 | ENSP00000377793 |
| ENSP00000288774 | ENSP00000380460 |
| ENSP00000288774 | ENSP00000394791 |
| ENSP00000288774 | ENSP00000396704 |



|                 |                 |
|-----------------|-----------------|
| ENSP00000288774 | ENSP00000402527 |
| ENSP00000288774 | ENSP00000407401 |
| ENSP00000288828 | ENSP00000290974 |
| ENSP00000288828 | ENSP00000294973 |
| ENSP00000288828 | ENSP00000300086 |
| ENSP00000288828 | ENSP00000300648 |
| ENSP00000288828 | ENSP00000305958 |
| ENSP00000288828 | ENSP00000343686 |
| ENSP00000288828 | ENSP00000348848 |
| ENSP00000288828 | ENSP00000350249 |
| ENSP00000288828 | ENSP00000353010 |
| ENSP00000288828 | ENSP00000353094 |
| ENSP00000288828 | ENSP00000358081 |
| ENSP00000288828 | ENSP00000362688 |
| ENSP00000288828 | ENSP00000363349 |
| ENSP00000288828 | ENSP00000364486 |
| ENSP00000288828 | ENSP00000364847 |
| ENSP00000288828 | ENSP00000368755 |
| ENSP00000288828 | ENSP00000370517 |
| ENSP00000288828 | ENSP00000379093 |
| ENSP00000288828 | ENSP00000419235 |
| ENSP00000288840 | ENSP00000328103 |
| ENSP00000288840 | ENSP00000341551 |
| ENSP00000288840 | ENSP00000345530 |
| ENSP00000288840 | ENSP00000352514 |
| ENSP00000288840 | ENSP00000358335 |
| ENSP00000288840 | ENSP00000392270 |
| ENSP00000288840 | ENSP00000397435 |
| ENSP00000288937 | ENSP00000296102 |
| ENSP00000288937 | ENSP00000296805 |
| ENSP00000288937 | ENSP00000297908 |
| ENSP00000288937 | ENSP00000300151 |
| ENSP00000288937 | ENSP00000301585 |
| ENSP00000288937 | ENSP00000302896 |
| ENSP00000288937 | ENSP00000305503 |
| ENSP00000288937 | ENSP00000306080 |
| ENSP00000288937 | ENSP00000306548 |
| ENSP00000288937 | ENSP00000308275 |
| ENSP00000288937 | ENSP00000308897 |
| ENSP00000288937 | ENSP00000311028 |
| ENSP00000288937 | ENSP00000312311 |
| ENSP00000288937 | ENSP00000314949 |
| ENSP00000288937 | ENSP00000315017 |
| ENSP00000288937 | ENSP00000317376 |
| ENSP00000288937 | ENSP00000323288 |
| ENSP00000288937 | ENSP00000324122 |

|                 |                 |
|-----------------|-----------------|
| ENSP00000288937 | ENSP00000326981 |
| ENSP00000288937 | ENSP00000333401 |
| ENSP00000288937 | ENSP00000333837 |
| ENSP00000288937 | ENSP00000339503 |
| ENSP00000288937 | ENSP00000339532 |
| ENSP00000288937 | ENSP00000339795 |
| ENSP00000288937 | ENSP00000339845 |
| ENSP00000288937 | ENSP00000341082 |
| ENSP00000288937 | ENSP00000343745 |
| ENSP00000288937 | ENSP00000346015 |
| ENSP00000288937 | ENSP00000346022 |
| ENSP00000288937 | ENSP00000346067 |
| ENSP00000288937 | ENSP00000354525 |
| ENSP00000288937 | ENSP00000358812 |
| ENSP00000288937 | ENSP00000359345 |
| ENSP00000288937 | ENSP00000360286 |
| ENSP00000288937 | ENSP00000362036 |
| ENSP00000288937 | ENSP00000362208 |
| ENSP00000288937 | ENSP00000363018 |
| ENSP00000288937 | ENSP00000363676 |
| ENSP00000288937 | ENSP00000364320 |
| ENSP00000288937 | ENSP00000368140 |
| ENSP00000288937 | ENSP00000370589 |
| ENSP00000288937 | ENSP00000373404 |
| ENSP00000288937 | ENSP00000374443 |
| ENSP00000288937 | ENSP00000375730 |
| ENSP00000288937 | ENSP00000377486 |
| ENSP00000288937 | ENSP00000377865 |
| ENSP00000288937 | ENSP00000389103 |
| ENSP00000288937 | ENSP00000393953 |
| ENSP00000288937 | ENSP00000417602 |
| ENSP00000288976 | ENSP00000293860 |
| ENSP00000288976 | ENSP00000295951 |
| ENSP00000288976 | ENSP00000296509 |
| ENSP00000288976 | ENSP00000297338 |
| ENSP00000288976 | ENSP00000297431 |
| ENSP00000288976 | ENSP00000300584 |
| ENSP00000288976 | ENSP00000308699 |
| ENSP00000288976 | ENSP00000310649 |
| ENSP00000288976 | ENSP00000310668 |
| ENSP00000288976 | ENSP00000322570 |
| ENSP00000288976 | ENSP00000324124 |
| ENSP00000288976 | ENSP00000325863 |
| ENSP00000288976 | ENSP00000331111 |
| ENSP00000288976 | ENSP00000343741 |
| ENSP00000288976 | ENSP00000346566 |

|                 |                 |
|-----------------|-----------------|
| ENSP00000288976 | ENSP00000351596 |
| ENSP00000288976 | ENSP00000354927 |
| ENSP00000288976 | ENSP00000361465 |
| ENSP00000288976 | ENSP00000362578 |
| ENSP00000288976 | ENSP00000365005 |
| ENSP00000288976 | ENSP00000367029 |
| ENSP00000288976 | ENSP00000371475 |
| ENSP00000288976 | ENSP00000372023 |
| ENSP00000288976 | ENSP00000377793 |
| ENSP00000288976 | ENSP00000382423 |
| ENSP00000288976 | ENSP00000382562 |
| ENSP00000288976 | ENSP00000383503 |
| ENSP00000288976 | ENSP00000397636 |
| ENSP00000288976 | ENSP00000405636 |
| ENSP00000288976 | ENSP00000410530 |
| ENSP00000288976 | ENSP00000410954 |
| ENSP00000288976 | ENSP00000414110 |
| ENSP00000288976 | ENSP00000416599 |
| ENSP00000288985 | ENSP00000296755 |
| ENSP00000288985 | ENSP00000300231 |
| ENSP00000288985 | ENSP00000302111 |
| ENSP00000288985 | ENSP00000318674 |
| ENSP00000288985 | ENSP00000321386 |
| ENSP00000288985 | ENSP00000321927 |
| ENSP00000288985 | ENSP00000325863 |
| ENSP00000288985 | ENSP00000330098 |
| ENSP00000288985 | ENSP00000343741 |
| ENSP00000288985 | ENSP00000360621 |
| ENSP00000288985 | ENSP00000364126 |
| ENSP00000288985 | ENSP00000366135 |
| ENSP00000288985 | ENSP00000366271 |
| ENSP00000288985 | ENSP00000369335 |
| ENSP00000288985 | ENSP00000370150 |
| ENSP00000288985 | ENSP00000384490 |
| ENSP00000288985 | ENSP00000418111 |
| ENSP00000289013 | ENSP00000299601 |
| ENSP00000289013 | ENSP00000300413 |
| ENSP00000289013 | ENSP00000302160 |
| ENSP00000289013 | ENSP00000310596 |
| ENSP00000289013 | ENSP00000319341 |
| ENSP00000289013 | ENSP00000337675 |
| ENSP00000289013 | ENSP00000353701 |
| ENSP00000289013 | ENSP00000354718 |
| ENSP00000289081 | ENSP00000296702 |
| ENSP00000289081 | ENSP00000296930 |
| ENSP00000289081 | ENSP00000299767 |

|                 |                 |
|-----------------|-----------------|
| ENSP00000289081 | ENSP00000326819 |
| ENSP00000289081 | ENSP00000330875 |
| ENSP00000289081 | ENSP00000344456 |
| ENSP00000289081 | ENSP00000346050 |
| ENSP00000289081 | ENSP00000354632 |
| ENSP00000289081 | ENSP00000361824 |
| ENSP00000289081 | ENSP00000367808 |
| ENSP00000289081 | ENSP00000367910 |
| ENSP00000289081 | ENSP00000373952 |
| ENSP00000289081 | ENSP00000385021 |
| ENSP00000289081 | ENSP00000396301 |
| ENSP00000289359 | ENSP00000310440 |
| ENSP00000289371 | ENSP00000294053 |
| ENSP00000289371 | ENSP00000296577 |
| ENSP00000289371 | ENSP00000296802 |
| ENSP00000289371 | ENSP00000298310 |
| ENSP00000289371 | ENSP00000298746 |
| ENSP00000289371 | ENSP00000299601 |
| ENSP00000289371 | ENSP00000302801 |
| ENSP00000289371 | ENSP00000304668 |
| ENSP00000289371 | ENSP00000307889 |
| ENSP00000289371 | ENSP00000308897 |
| ENSP00000289371 | ENSP00000309433 |
| ENSP00000289371 | ENSP00000311430 |
| ENSP00000289371 | ENSP00000314348 |
| ENSP00000289371 | ENSP00000318646 |
| ENSP00000289371 | ENSP00000325448 |
| ENSP00000289371 | ENSP00000329466 |
| ENSP00000289371 | ENSP00000329558 |
| ENSP00000289371 | ENSP00000339795 |
| ENSP00000289371 | ENSP00000340093 |
| ENSP00000289371 | ENSP00000343557 |
| ENSP00000289371 | ENSP00000346022 |
| ENSP00000289371 | ENSP00000346120 |
| ENSP00000289371 | ENSP00000346236 |
| ENSP00000289371 | ENSP00000346762 |
| ENSP00000289371 | ENSP00000347087 |
| ENSP00000289371 | ENSP00000354125 |
| ENSP00000289371 | ENSP00000354739 |
| ENSP00000289371 | ENSP00000356290 |
| ENSP00000289371 | ENSP00000358140 |
| ENSP00000289371 | ENSP00000358497 |
| ENSP00000289371 | ENSP00000358563 |
| ENSP00000289371 | ENSP00000358812 |
| ENSP00000289371 | ENSP00000359345 |
| ENSP00000289371 | ENSP00000360532 |

|                 |                 |
|-----------------|-----------------|
| ENSP00000289371 | ENSP00000360828 |
| ENSP00000289371 | ENSP00000361076 |
| ENSP00000289371 | ENSP00000361232 |
| ENSP00000289371 | ENSP00000361982 |
| ENSP00000289371 | ENSP00000362688 |
| ENSP00000289371 | ENSP00000362744 |
| ENSP00000289371 | ENSP00000363944 |
| ENSP00000289371 | ENSP00000364119 |
| ENSP00000289371 | ENSP00000366974 |
| ENSP00000289371 | ENSP00000367498 |
| ENSP00000289371 | ENSP00000367637 |
| ENSP00000289371 | ENSP00000368927 |
| ENSP00000289371 | ENSP00000369162 |
| ENSP00000289371 | ENSP00000370258 |
| ENSP00000289371 | ENSP00000372093 |
| ENSP00000289371 | ENSP00000373404 |
| ENSP00000289371 | ENSP00000374399 |
| ENSP00000289371 | ENSP00000377617 |
| ENSP00000289371 | ENSP00000378286 |
| ENSP00000289371 | ENSP00000379888 |
| ENSP00000289371 | ENSP00000380982 |
| ENSP00000289371 | ENSP00000393953 |
| ENSP00000289371 | ENSP00000417229 |
| ENSP00000289373 | ENSP00000322170 |
| ENSP00000289382 | ENSP00000290231 |
| ENSP00000289422 | ENSP00000323967 |
| ENSP00000289422 | ENSP00000348307 |
| ENSP00000289431 | ENSP00000295025 |
| ENSP00000289431 | ENSP00000312244 |
| ENSP00000289431 | ENSP00000313752 |
| ENSP00000289431 | ENSP00000352408 |
| ENSP00000289431 | ENSP00000360473 |
| ENSP00000289431 | ENSP00000363734 |
| ENSP00000289431 | ENSP00000366434 |
| ENSP00000289431 | ENSP00000367408 |
| ENSP00000289431 | ENSP00000370376 |
| ENSP00000289431 | ENSP00000412319 |
| ENSP00000289528 | ENSP00000309474 |
| ENSP00000289528 | ENSP00000310129 |
| ENSP00000289528 | ENSP00000331487 |
| ENSP00000289528 | ENSP00000363338 |
| ENSP00000289619 | ENSP00000350249 |
| ENSP00000289749 | ENSP00000365131 |
| ENSP00000289968 | ENSP00000300574 |
| ENSP00000289968 | ENSP00000301843 |
| ENSP00000289968 | ENSP00000315659 |

|                 |                 |
|-----------------|-----------------|
| ENSP00000289968 | ENSP00000344666 |
| ENSP00000289968 | ENSP00000361027 |
| ENSP00000289968 | ENSP00000380921 |
| ENSP00000289968 | ENSP00000413625 |
| ENSP00000290130 | ENSP00000336868 |
| ENSP00000290130 | ENSP00000362592 |
| ENSP00000290130 | ENSP00000366953 |
| ENSP00000290130 | ENSP00000367034 |
| ENSP00000290130 | ENSP00000387982 |
| ENSP00000290155 | ENSP00000294952 |
| ENSP00000290158 | ENSP00000290649 |
| ENSP00000290158 | ENSP00000291688 |
| ENSP00000290158 | ENSP00000292432 |
| ENSP00000290158 | ENSP00000296257 |
| ENSP00000290158 | ENSP00000297338 |
| ENSP00000290158 | ENSP00000298746 |
| ENSP00000290158 | ENSP00000300128 |
| ENSP00000290158 | ENSP00000300403 |
| ENSP00000290158 | ENSP00000300413 |
| ENSP00000290158 | ENSP00000301019 |
| ENSP00000290158 | ENSP00000302111 |
| ENSP00000290158 | ENSP00000302955 |
| ENSP00000290158 | ENSP00000304370 |
| ENSP00000290158 | ENSP00000305503 |
| ENSP00000290158 | ENSP00000306561 |
| ENSP00000290158 | ENSP00000308546 |
| ENSP00000290158 | ENSP00000308622 |
| ENSP00000290158 | ENSP00000309334 |
| ENSP00000290158 | ENSP00000309831 |
| ENSP00000290158 | ENSP00000310082 |
| ENSP00000290158 | ENSP00000310668 |
| ENSP00000290158 | ENSP00000311430 |
| ENSP00000290158 | ENSP00000311873 |
| ENSP00000290158 | ENSP00000312778 |
| ENSP00000290158 | ENSP00000313674 |
| ENSP00000290158 | ENSP00000316032 |
| ENSP00000290158 | ENSP00000316879 |
| ENSP00000290158 | ENSP00000317955 |
| ENSP00000290158 | ENSP00000320130 |
| ENSP00000290158 | ENSP00000322579 |
| ENSP00000290158 | ENSP00000324122 |
| ENSP00000290158 | ENSP00000324203 |
| ENSP00000290158 | ENSP00000326806 |
| ENSP00000290158 | ENSP00000327197 |
| ENSP00000290158 | ENSP00000327213 |
| ENSP00000290158 | ENSP00000328103 |

|                 |                 |
|-----------------|-----------------|
| ENSP00000290158 | ENSP00000329466 |
| ENSP00000290158 | ENSP00000331310 |
| ENSP00000290158 | ENSP00000332103 |
| ENSP00000290158 | ENSP00000334148 |
| ENSP00000290158 | ENSP00000337405 |
| ENSP00000290158 | ENSP00000340281 |
| ENSP00000290158 | ENSP00000341170 |
| ENSP00000290158 | ENSP00000341243 |
| ENSP00000290158 | ENSP00000341551 |
| ENSP00000290158 | ENSP00000342374 |
| ENSP00000290158 | ENSP00000343701 |
| ENSP00000290158 | ENSP00000343741 |
| ENSP00000290158 | ENSP00000344241 |
| ENSP00000290158 | ENSP00000344504 |
| ENSP00000290158 | ENSP00000344547 |
| ENSP00000290158 | ENSP00000344741 |
| ENSP00000290158 | ENSP00000345702 |
| ENSP00000290158 | ENSP00000345895 |
| ENSP00000290158 | ENSP00000346453 |
| ENSP00000290158 | ENSP00000346725 |
| ENSP00000290158 | ENSP00000347184 |
| ENSP00000290158 | ENSP00000347314 |
| ENSP00000290158 | ENSP00000348577 |
| ENSP00000290158 | ENSP00000352400 |
| ENSP00000290158 | ENSP00000354125 |
| ENSP00000290158 | ENSP00000354497 |
| ENSP00000290158 | ENSP00000356448 |
| ENSP00000290158 | ENSP00000358563 |
| ENSP00000290158 | ENSP00000358605 |
| ENSP00000290158 | ENSP00000359345 |
| ENSP00000290158 | ENSP00000359403 |
| ENSP00000290158 | ENSP00000359518 |
| ENSP00000290158 | ENSP00000359688 |
| ENSP00000290158 | ENSP00000360532 |
| ENSP00000290158 | ENSP00000360798 |
| ENSP00000290158 | ENSP00000361982 |
| ENSP00000290158 | ENSP00000362352 |
| ENSP00000290158 | ENSP00000362532 |
| ENSP00000290158 | ENSP00000362936 |
| ENSP00000290158 | ENSP00000363779 |
| ENSP00000290158 | ENSP00000364289 |
| ENSP00000290158 | ENSP00000364929 |
| ENSP00000290158 | ENSP00000366135 |
| ENSP00000290158 | ENSP00000367208 |
| ENSP00000290158 | ENSP00000369042 |
| ENSP00000290158 | ENSP00000369716 |

|                 |                 |
|-----------------|-----------------|
| ENSP00000290158 | ENSP00000370083 |
| ENSP00000290158 | ENSP00000370105 |
| ENSP00000290158 | ENSP00000370119 |
| ENSP00000290158 | ENSP00000370588 |
| ENSP00000290158 | ENSP00000370589 |
| ENSP00000290158 | ENSP00000370741 |
| ENSP00000290158 | ENSP00000372023 |
| ENSP00000290158 | ENSP00000374443 |
| ENSP00000290158 | ENSP00000375730 |
| ENSP00000290158 | ENSP00000376309 |
| ENSP00000290158 | ENSP00000377655 |
| ENSP00000290158 | ENSP00000379213 |
| ENSP00000290158 | ENSP00000379607 |
| ENSP00000290158 | ENSP00000380504 |
| ENSP00000290158 | ENSP00000381282 |
| ENSP00000290158 | ENSP00000382779 |
| ENSP00000290158 | ENSP00000384109 |
| ENSP00000290158 | ENSP00000394791 |
| ENSP00000290158 | ENSP00000402527 |
| ENSP00000290158 | ENSP00000412566 |
| ENSP00000290158 | ENSP00000414321 |
| ENSP00000290158 | ENSP00000416959 |
| ENSP00000290158 | ENSP00000417229 |
| ENSP00000290158 | ENSP00000418734 |
| ENSP00000290216 | ENSP00000300086 |
| ENSP00000290219 | ENSP00000356713 |
| ENSP00000290231 | ENSP00000291688 |
| ENSP00000290231 | ENSP00000301740 |
| ENSP00000290231 | ENSP00000302790 |
| ENSP00000290231 | ENSP00000302886 |
| ENSP00000290231 | ENSP00000308622 |
| ENSP00000290231 | ENSP00000310668 |
| ENSP00000290231 | ENSP00000312753 |
| ENSP00000290231 | ENSP00000313829 |
| ENSP00000290231 | ENSP00000326261 |
| ENSP00000290231 | ENSP00000343701 |
| ENSP00000290231 | ENSP00000352400 |
| ENSP00000290231 | ENSP00000354673 |
| ENSP00000290231 | ENSP00000354957 |
| ENSP00000290231 | ENSP00000356744 |
| ENSP00000290231 | ENSP00000361180 |
| ENSP00000290231 | ENSP00000366135 |
| ENSP00000290231 | ENSP00000379607 |
| ENSP00000290231 | ENSP00000382779 |
| ENSP00000290231 | ENSP00000392985 |
| ENSP00000290231 | ENSP00000397441 |



|                 |                 |
|-----------------|-----------------|
| ENSP00000290231 | ENSP00000403536 |
| ENSP00000290291 | ENSP00000300086 |
| ENSP00000290291 | ENSP00000326261 |
| ENSP00000290299 | ENSP00000292475 |
| ENSP00000290299 | ENSP00000294008 |
| ENSP00000290299 | ENSP00000295890 |
| ENSP00000290299 | ENSP00000300688 |
| ENSP00000290299 | ENSP00000301587 |
| ENSP00000290299 | ENSP00000306003 |
| ENSP00000290299 | ENSP00000306106 |
| ENSP00000290299 | ENSP00000317159 |
| ENSP00000290299 | ENSP00000317780 |
| ENSP00000290299 | ENSP00000324956 |
| ENSP00000290299 | ENSP00000332887 |
| ENSP00000290299 | ENSP00000333255 |
| ENSP00000290299 | ENSP00000337838 |
| ENSP00000290299 | ENSP00000341838 |
| ENSP00000290299 | ENSP00000349142 |
| ENSP00000290299 | ENSP00000354554 |
| ENSP00000290299 | ENSP00000354632 |
| ENSP00000290299 | ENSP00000354791 |
| ENSP00000290299 | ENSP00000358737 |
| ENSP00000290299 | ENSP00000358831 |
| ENSP00000290299 | ENSP00000359321 |
| ENSP00000290299 | ENSP00000360782 |
| ENSP00000290299 | ENSP00000361686 |
| ENSP00000290299 | ENSP00000364188 |
| ENSP00000290299 | ENSP00000365243 |
| ENSP00000290299 | ENSP00000367934 |
| ENSP00000290299 | ENSP00000370414 |
| ENSP00000290299 | ENSP00000387262 |
| ENSP00000290299 | ENSP00000388275 |
| ENSP00000290299 | ENSP00000389649 |
| ENSP00000290299 | ENSP00000392330 |
| ENSP00000290330 | ENSP00000297265 |
| ENSP00000290330 | ENSP00000310440 |
| ENSP00000290330 | ENSP00000314949 |
| ENSP00000290330 | ENSP00000317468 |
| ENSP00000290330 | ENSP00000354522 |
| ENSP00000290330 | ENSP00000366565 |
| ENSP00000290330 | ENSP00000367299 |
| ENSP00000290330 | ENSP00000386394 |
| ENSP00000290332 | ENSP00000327070 |
| ENSP00000290332 | ENSP00000336702 |
| ENSP00000290332 | ENSP00000352706 |
| ENSP00000290349 | ENSP00000338990 |

|                 |                 |
|-----------------|-----------------|
| ENSP00000290349 | ENSP00000348565 |
| ENSP00000290349 | ENSP00000352928 |
| ENSP00000290401 | ENSP00000361032 |
| ENSP00000290429 | ENSP00000301585 |
| ENSP00000290429 | ENSP00000304102 |
| ENSP00000290429 | ENSP00000306080 |
| ENSP00000290429 | ENSP00000312735 |
| ENSP00000290429 | ENSP00000315693 |
| ENSP00000290429 | ENSP00000322570 |
| ENSP00000290429 | ENSP00000324122 |
| ENSP00000290429 | ENSP00000330343 |
| ENSP00000290429 | ENSP00000337445 |
| ENSP00000290429 | ENSP00000340019 |
| ENSP00000290429 | ENSP00000351697 |
| ENSP00000290429 | ENSP00000364320 |
| ENSP00000290429 | ENSP00000367407 |
| ENSP00000290429 | ENSP00000368349 |
| ENSP00000290429 | ENSP00000394382 |
| ENSP00000290524 | ENSP00000296785 |
| ENSP00000290524 | ENSP00000300738 |
| ENSP00000290524 | ENSP00000307208 |
| ENSP00000290524 | ENSP00000316328 |
| ENSP00000290524 | ENSP00000332171 |
| ENSP00000290524 | ENSP00000333920 |
| ENSP00000290524 | ENSP00000343741 |
| ENSP00000290524 | ENSP00000344537 |
| ENSP00000290524 | ENSP00000349213 |
| ENSP00000290524 | ENSP00000360532 |
| ENSP00000290524 | ENSP00000368349 |
| ENSP00000290524 | ENSP00000368438 |
| ENSP00000290524 | ENSP00000372023 |
| ENSP00000290524 | ENSP00000375986 |
| ENSP00000290541 | ENSP00000293362 |
| ENSP00000290541 | ENSP00000294008 |
| ENSP00000290541 | ENSP00000295901 |
| ENSP00000290541 | ENSP00000298852 |
| ENSP00000290541 | ENSP00000300249 |
| ENSP00000290541 | ENSP00000307746 |
| ENSP00000290541 | ENSP00000309474 |
| ENSP00000290541 | ENSP00000310129 |
| ENSP00000290541 | ENSP00000311083 |
| ENSP00000290541 | ENSP00000311344 |
| ENSP00000290541 | ENSP00000314837 |
| ENSP00000290541 | ENSP00000318195 |
| ENSP00000290541 | ENSP00000325919 |
| ENSP00000290541 | ENSP00000343535 |

|                 |                 |
|-----------------|-----------------|
| ENSP00000290541 | ENSP00000348442 |
| ENSP00000290541 | ENSP00000352820 |
| ENSP00000290541 | ENSP00000353059 |
| ENSP00000290541 | ENSP00000358147 |
| ENSP00000290541 | ENSP00000362334 |
| ENSP00000290541 | ENSP00000366249 |
| ENSP00000290541 | ENSP00000366953 |
| ENSP00000290541 | ENSP00000370222 |
| ENSP00000290541 | ENSP00000384211 |
| ENSP00000290541 | ENSP00000396937 |
| ENSP00000290541 | ENSP00000403852 |
| ENSP00000290541 | ENSP00000404232 |
| ENSP00000290541 | ENSP00000416583 |
| ENSP00000290541 | ENSP00000418734 |
| ENSP00000290597 | ENSP00000349577 |
| ENSP00000290607 | ENSP00000301457 |
| ENSP00000290607 | ENSP00000343818 |
| ENSP00000290607 | ENSP00000348128 |
| ENSP00000290649 | ENSP00000294053 |
| ENSP00000290649 | ENSP00000294119 |
| ENSP00000290649 | ENSP00000294785 |
| ENSP00000290649 | ENSP00000296328 |
| ENSP00000290649 | ENSP00000296755 |
| ENSP00000290649 | ENSP00000299767 |
| ENSP00000290649 | ENSP00000300231 |
| ENSP00000290649 | ENSP00000309141 |
| ENSP00000290649 | ENSP00000312042 |
| ENSP00000290649 | ENSP00000317087 |
| ENSP00000290649 | ENSP00000317334 |
| ENSP00000290649 | ENSP00000318115 |
| ENSP00000290649 | ENSP00000321606 |
| ENSP00000290649 | ENSP00000329002 |
| ENSP00000290649 | ENSP00000331487 |
| ENSP00000290649 | ENSP00000340019 |
| ENSP00000290649 | ENSP00000344741 |
| ENSP00000290649 | ENSP00000346130 |
| ENSP00000290649 | ENSP00000347184 |
| ENSP00000290649 | ENSP00000348877 |
| ENSP00000290649 | ENSP00000350708 |
| ENSP00000290649 | ENSP00000357998 |
| ENSP00000290649 | ENSP00000359305 |
| ENSP00000290649 | ENSP00000359345 |
| ENSP00000290649 | ENSP00000359976 |
| ENSP00000290649 | ENSP00000360621 |
| ENSP00000290649 | ENSP00000361057 |
| ENSP00000290649 | ENSP00000365131 |

|                 |                 |
|-----------------|-----------------|
| ENSP00000290649 | ENSP00000365534 |
| ENSP00000290649 | ENSP00000366156 |
| ENSP00000290649 | ENSP00000366395 |
| ENSP00000290649 | ENSP00000379457 |
| ENSP00000290649 | ENSP00000381282 |
| ENSP00000290649 | ENSP00000384900 |
| ENSP00000290649 | ENSP00000389182 |
| ENSP00000290663 | ENSP00000292035 |
| ENSP00000290663 | ENSP00000293777 |
| ENSP00000290663 | ENSP00000295685 |
| ENSP00000290663 | ENSP00000295899 |
| ENSP00000290663 | ENSP00000297347 |
| ENSP00000290663 | ENSP00000299543 |
| ENSP00000290663 | ENSP00000300651 |
| ENSP00000290663 | ENSP00000323720 |
| ENSP00000290663 | ENSP00000325612 |
| ENSP00000290663 | ENSP00000326128 |
| ENSP00000290663 | ENSP00000326767 |
| ENSP00000290663 | ENSP00000337340 |
| ENSP00000290663 | ENSP00000342343 |
| ENSP00000290663 | ENSP00000342434 |
| ENSP00000290663 | ENSP00000349016 |
| ENSP00000290663 | ENSP00000357047 |
| ENSP00000290663 | ENSP00000357907 |
| ENSP00000290663 | ENSP00000362948 |
| ENSP00000290663 | ENSP00000363193 |
| ENSP00000290663 | ENSP00000381216 |
| ENSP00000290663 | ENSP00000384048 |
| ENSP00000290663 | ENSP00000391774 |
| ENSP00000290663 | ENSP00000392617 |
| ENSP00000290663 | ENSP00000418734 |
| ENSP00000290795 | ENSP00000381031 |
| ENSP00000290810 | ENSP00000299626 |
| ENSP00000290810 | ENSP00000300738 |
| ENSP00000290810 | ENSP00000301788 |
| ENSP00000290810 | ENSP00000323822 |
| ENSP00000290810 | ENSP00000340879 |
| ENSP00000290810 | ENSP00000341957 |
| ENSP00000290810 | ENSP00000346566 |
| ENSP00000290810 | ENSP00000354340 |
| ENSP00000290810 | ENSP00000358147 |
| ENSP00000290810 | ENSP00000359939 |
| ENSP00000290810 | ENSP00000363779 |
| ENSP00000290810 | ENSP00000365773 |
| ENSP00000290810 | ENSP00000366434 |
| ENSP00000290810 | ENSP00000368887 |

|                 |                 |
|-----------------|-----------------|
| ENSP00000290846 | ENSP00000294724 |
| ENSP00000290846 | ENSP00000314615 |
| ENSP00000290846 | ENSP00000340019 |
| ENSP00000290846 | ENSP00000351644 |
| ENSP00000290846 | ENSP00000356405 |
| ENSP00000290846 | ENSP00000361005 |
| ENSP00000290846 | ENSP00000362592 |
| ENSP00000290846 | ENSP00000373399 |
| ENSP00000290846 | ENSP00000386759 |
| ENSP00000290846 | ENSP00000402038 |
| ENSP00000290866 | ENSP00000302176 |
| ENSP00000290866 | ENSP00000340409 |
| ENSP00000290913 | ENSP00000345445 |
| ENSP00000290913 | ENSP00000387262 |
| ENSP00000290949 | ENSP00000292114 |
| ENSP00000290949 | ENSP00000307853 |
| ENSP00000290949 | ENSP00000310520 |
| ENSP00000290949 | ENSP00000314615 |
| ENSP00000290949 | ENSP00000326534 |
| ENSP00000290949 | ENSP00000332247 |
| ENSP00000290949 | ENSP00000333255 |
| ENSP00000290949 | ENSP00000351284 |
| ENSP00000290949 | ENSP00000351697 |
| ENSP00000290949 | ENSP00000352522 |
| ENSP00000290949 | ENSP00000356744 |
| ENSP00000290949 | ENSP00000358777 |
| ENSP00000290949 | ENSP00000360183 |
| ENSP00000290949 | ENSP00000363162 |
| ENSP00000290949 | ENSP00000365756 |
| ENSP00000290949 | ENSP00000367697 |
| ENSP00000290949 | ENSP00000369513 |
| ENSP00000290953 | ENSP00000335074 |
| ENSP00000290974 | ENSP00000334188 |
| ENSP00000290974 | ENSP00000346022 |
| ENSP00000290974 | ENSP00000354519 |
| ENSP00000291232 | ENSP00000365048 |
| ENSP00000291386 | ENSP00000292476 |
| ENSP00000291386 | ENSP00000296328 |
| ENSP00000291386 | ENSP00000296490 |
| ENSP00000291386 | ENSP00000297338 |
| ENSP00000291386 | ENSP00000298281 |
| ENSP00000291386 | ENSP00000299543 |
| ENSP00000291386 | ENSP00000304704 |
| ENSP00000291386 | ENSP00000312735 |
| ENSP00000291386 | ENSP00000314949 |
| ENSP00000291386 | ENSP00000317872 |

|                 |                 |
|-----------------|-----------------|
| ENSP00000291386 | ENSP00000325377 |
| ENSP00000291386 | ENSP00000329029 |
| ENSP00000291386 | ENSP00000332444 |
| ENSP00000291386 | ENSP00000336752 |
| ENSP00000291386 | ENSP00000339353 |
| ENSP00000291386 | ENSP00000340896 |
| ENSP00000291386 | ENSP00000354720 |
| ENSP00000291386 | ENSP00000355205 |
| ENSP00000291386 | ENSP00000358497 |
| ENSP00000291386 | ENSP00000359531 |
| ENSP00000291386 | ENSP00000366030 |
| ENSP00000291386 | ENSP00000366434 |
| ENSP00000291386 | ENSP00000382779 |
| ENSP00000291386 | ENSP00000387019 |
| ENSP00000291526 | ENSP00000321106 |
| ENSP00000291539 | ENSP00000348554 |
| ENSP00000291539 | ENSP00000351015 |
| ENSP00000291539 | ENSP00000362987 |
| ENSP00000291539 | ENSP00000363095 |
| ENSP00000291560 | ENSP00000356405 |
| ENSP00000291560 | ENSP00000357440 |
| ENSP00000291565 | ENSP00000325863 |
| ENSP00000291565 | ENSP00000351284 |
| ENSP00000291565 | ENSP00000360116 |
| ENSP00000291565 | ENSP00000379607 |
| ENSP00000291574 | ENSP00000302783 |
| ENSP00000291574 | ENSP00000311134 |
| ENSP00000291574 | ENSP00000316990 |
| ENSP00000291574 | ENSP00000352708 |
| ENSP00000291574 | ENSP00000359000 |
| ENSP00000291574 | ENSP00000373979 |
| ENSP00000291574 | ENSP00000376871 |
| ENSP00000291574 | ENSP00000402935 |
| ENSP00000291576 | ENSP00000296792 |
| ENSP00000291576 | ENSP00000297579 |
| ENSP00000291576 | ENSP00000297990 |
| ENSP00000291576 | ENSP00000298746 |
| ENSP00000291576 | ENSP00000301012 |
| ENSP00000291576 | ENSP00000302896 |
| ENSP00000291576 | ENSP00000305702 |
| ENSP00000291576 | ENSP00000308179 |
| ENSP00000291576 | ENSP00000310590 |
| ENSP00000291576 | ENSP00000311135 |
| ENSP00000291576 | ENSP00000311430 |
| ENSP00000291576 | ENSP00000314193 |
| ENSP00000291576 | ENSP00000314348 |

|                 |                 |
|-----------------|-----------------|
| ENSP00000291576 | ENSP00000315674 |
| ENSP00000291576 | ENSP00000321449 |
| ENSP00000291576 | ENSP00000322419 |
| ENSP00000291576 | ENSP00000326981 |
| ENSP00000291576 | ENSP00000327179 |
| ENSP00000291576 | ENSP00000328854 |
| ENSP00000291576 | ENSP00000329466 |
| ENSP00000291576 | ENSP00000338862 |
| ENSP00000291576 | ENSP00000339145 |
| ENSP00000291576 | ENSP00000339795 |
| ENSP00000291576 | ENSP00000353246 |
| ENSP00000291576 | ENSP00000354040 |
| ENSP00000291576 | ENSP00000354125 |
| ENSP00000291576 | ENSP00000354742 |
| ENSP00000291576 | ENSP00000355471 |
| ENSP00000291576 | ENSP00000355541 |
| ENSP00000291576 | ENSP00000358563 |
| ENSP00000291576 | ENSP00000358812 |
| ENSP00000291576 | ENSP00000359345 |
| ENSP00000291576 | ENSP00000360031 |
| ENSP00000291576 | ENSP00000362105 |
| ENSP00000291576 | ENSP00000362352 |
| ENSP00000291576 | ENSP00000362744 |
| ENSP00000291576 | ENSP00000363642 |
| ENSP00000291576 | ENSP00000363746 |
| ENSP00000291576 | ENSP00000366974 |
| ENSP00000291576 | ENSP00000370258 |
| ENSP00000291576 | ENSP00000370589 |
| ENSP00000291576 | ENSP00000371101 |
| ENSP00000291576 | ENSP00000371169 |
| ENSP00000291576 | ENSP00000372695 |
| ENSP00000291576 | ENSP00000373404 |
| ENSP00000291576 | ENSP00000379042 |
| ENSP00000291576 | ENSP00000384302 |
| ENSP00000291576 | ENSP00000386134 |
| ENSP00000291576 | ENSP00000399454 |
| ENSP00000291576 | ENSP00000402869 |
| ENSP00000291576 | ENSP00000405614 |
| ENSP00000291576 | ENSP00000410396 |
| ENSP00000291577 | ENSP00000379607 |
| ENSP00000291582 | ENSP00000300574 |
| ENSP00000291582 | ENSP00000331310 |
| ENSP00000291582 | ENSP00000342181 |
| ENSP00000291582 | ENSP00000353622 |
| ENSP00000291582 | ENSP00000360031 |
| ENSP00000291582 | ENSP00000362592 |

|                 |                 |
|-----------------|-----------------|
| ENSP00000291672 | ENSP00000387911 |
| ENSP00000291688 | ENSP00000294168 |
| ENSP00000291688 | ENSP00000295066 |
| ENSP00000291688 | ENSP00000300896 |
| ENSP00000291688 | ENSP00000301788 |
| ENSP00000291688 | ENSP00000303434 |
| ENSP00000291688 | ENSP00000304593 |
| ENSP00000291688 | ENSP00000304704 |
| ENSP00000291688 | ENSP00000305503 |
| ENSP00000291688 | ENSP00000308622 |
| ENSP00000291688 | ENSP00000310042 |
| ENSP00000291688 | ENSP00000310596 |
| ENSP00000291688 | ENSP00000310668 |
| ENSP00000291688 | ENSP00000315791 |
| ENSP00000291688 | ENSP00000316032 |
| ENSP00000291688 | ENSP00000318374 |
| ENSP00000291688 | ENSP00000320566 |
| ENSP00000291688 | ENSP00000321711 |
| ENSP00000291688 | ENSP00000323858 |
| ENSP00000291688 | ENSP00000325677 |
| ENSP00000291688 | ENSP00000326806 |
| ENSP00000291688 | ENSP00000329466 |
| ENSP00000291688 | ENSP00000331817 |
| ENSP00000291688 | ENSP00000332340 |
| ENSP00000291688 | ENSP00000333376 |
| ENSP00000291688 | ENSP00000334808 |
| ENSP00000291688 | ENSP00000334836 |
| ENSP00000291688 | ENSP00000336712 |
| ENSP00000291688 | ENSP00000336842 |
| ENSP00000291688 | ENSP00000337405 |
| ENSP00000291688 | ENSP00000343535 |
| ENSP00000291688 | ENSP00000343701 |
| ENSP00000291688 | ENSP00000343741 |
| ENSP00000291688 | ENSP00000344537 |
| ENSP00000291688 | ENSP00000346986 |
| ENSP00000291688 | ENSP00000347733 |
| ENSP00000291688 | ENSP00000348010 |
| ENSP00000291688 | ENSP00000348107 |
| ENSP00000291688 | ENSP00000350009 |
| ENSP00000291688 | ENSP00000352400 |
| ENSP00000291688 | ENSP00000353622 |
| ENSP00000291688 | ENSP00000354125 |
| ENSP00000291688 | ENSP00000354742 |
| ENSP00000291688 | ENSP00000355185 |
| ENSP00000291688 | ENSP00000356405 |
| ENSP00000291688 | ENSP00000356448 |



|                 |                 |
|-----------------|-----------------|
| ENSP00000291688 | ENSP00000356470 |
| ENSP00000291688 | ENSP00000357887 |
| ENSP00000291688 | ENSP00000358576 |
| ENSP00000291688 | ENSP00000358886 |
| ENSP00000291688 | ENSP00000360286 |
| ENSP00000291688 | ENSP00000360515 |
| ENSP00000291688 | ENSP00000362532 |
| ENSP00000291688 | ENSP00000362900 |
| ENSP00000291688 | ENSP00000363313 |
| ENSP00000291688 | ENSP00000364289 |
| ENSP00000291688 | ENSP00000365811 |
| ENSP00000291688 | ENSP00000366135 |
| ENSP00000291688 | ENSP00000366513 |
| ENSP00000291688 | ENSP00000366974 |
| ENSP00000291688 | ENSP00000367527 |
| ENSP00000291688 | ENSP00000369042 |
| ENSP00000291688 | ENSP00000369897 |
| ENSP00000291688 | ENSP00000370589 |
| ENSP00000291688 | ENSP00000371155 |
| ENSP00000291688 | ENSP00000372023 |
| ENSP00000291688 | ENSP00000374213 |
| ENSP00000291688 | ENSP00000378350 |
| ENSP00000291688 | ENSP00000381654 |
| ENSP00000291688 | ENSP00000381863 |
| ENSP00000291688 | ENSP00000382562 |
| ENSP00000291688 | ENSP00000382779 |
| ENSP00000291688 | ENSP00000386456 |
| ENSP00000291688 | ENSP00000386992 |
| ENSP00000291688 | ENSP00000387006 |
| ENSP00000291688 | ENSP00000391944 |
| ENSP00000291688 | ENSP00000396620 |
| ENSP00000291688 | ENSP00000396937 |
| ENSP00000291688 | ENSP00000397259 |
| ENSP00000291688 | ENSP00000398208 |
| ENSP00000291688 | ENSP00000403397 |
| ENSP00000291688 | ENSP00000417229 |
| ENSP00000291688 | ENSP00000419628 |
| ENSP00000292035 | ENSP00000293777 |
| ENSP00000292035 | ENSP00000297347 |
| ENSP00000292035 | ENSP00000300651 |
| ENSP00000292035 | ENSP00000314615 |
| ENSP00000292035 | ENSP00000323720 |
| ENSP00000292035 | ENSP00000326128 |
| ENSP00000292035 | ENSP00000326767 |
| ENSP00000292035 | ENSP00000337340 |
| ENSP00000292035 | ENSP00000340019 |

|                 |                 |
|-----------------|-----------------|
| ENSP00000292035 | ENSP00000342343 |
| ENSP00000292035 | ENSP00000354951 |
| ENSP00000292035 | ENSP00000357047 |
| ENSP00000292035 | ENSP00000357907 |
| ENSP00000292035 | ENSP00000362948 |
| ENSP00000292035 | ENSP00000363193 |
| ENSP00000292035 | ENSP00000369162 |
| ENSP00000292035 | ENSP00000381216 |
| ENSP00000292035 | ENSP00000384048 |
| ENSP00000292035 | ENSP00000385021 |
| ENSP00000292035 | ENSP00000391774 |
| ENSP00000292035 | ENSP00000392617 |
| ENSP00000292035 | ENSP00000418734 |
| ENSP00000292055 | ENSP00000334061 |
| ENSP00000292055 | ENSP00000343392 |
| ENSP00000292055 | ENSP00000377793 |
| ENSP00000292055 | ENSP00000378306 |
| ENSP00000292114 | ENSP00000333255 |
| ENSP00000292114 | ENSP00000358777 |
| ENSP00000292114 | ENSP00000367697 |
| ENSP00000292114 | ENSP00000369513 |
| ENSP00000292180 | ENSP00000299608 |
| ENSP00000292180 | ENSP00000301585 |
| ENSP00000292180 | ENSP00000301788 |
| ENSP00000292180 | ENSP00000304592 |
| ENSP00000292180 | ENSP00000304908 |
| ENSP00000292180 | ENSP00000305465 |
| ENSP00000292180 | ENSP00000310129 |
| ENSP00000292180 | ENSP00000318602 |
| ENSP00000292180 | ENSP00000321706 |
| ENSP00000292180 | ENSP00000322706 |
| ENSP00000292180 | ENSP00000323313 |
| ENSP00000292180 | ENSP00000330836 |
| ENSP00000292180 | ENSP00000340019 |
| ENSP00000292180 | ENSP00000344460 |
| ENSP00000292180 | ENSP00000347345 |
| ENSP00000292180 | ENSP00000355890 |
| ENSP00000292180 | ENSP00000356574 |
| ENSP00000292180 | ENSP00000357904 |
| ENSP00000292180 | ENSP00000358307 |
| ENSP00000292180 | ENSP00000359818 |
| ENSP00000292180 | ENSP00000360327 |
| ENSP00000292180 | ENSP00000365775 |
| ENSP00000292180 | ENSP00000371888 |
| ENSP00000292180 | ENSP00000386722 |
| ENSP00000292180 | ENSP00000391685 |

|                 |                 |
|-----------------|-----------------|
| ENSP00000292180 | ENSP00000394085 |
| ENSP00000292180 | ENSP00000401508 |
| ENSP00000292199 | ENSP00000369618 |
| ENSP00000292199 | ENSP00000369871 |
| ENSP00000292211 | ENSP00000312439 |
| ENSP00000292363 | ENSP00000309831 |
| ENSP00000292363 | ENSP00000312735 |
| ENSP00000292363 | ENSP00000324124 |
| ENSP00000292363 | ENSP00000327704 |
| ENSP00000292363 | ENSP00000365131 |
| ENSP00000292363 | ENSP00000377969 |
| ENSP00000292363 | ENSP00000403852 |
| ENSP00000292363 | ENSP00000417281 |
| ENSP00000292385 | ENSP00000298910 |
| ENSP00000292385 | ENSP00000314499 |
| ENSP00000292385 | ENSP00000315659 |
| ENSP00000292385 | ENSP00000326238 |
| ENSP00000292385 | ENSP00000334836 |
| ENSP00000292385 | ENSP00000348163 |
| ENSP00000292385 | ENSP00000348602 |
| ENSP00000292385 | ENSP00000349016 |
| ENSP00000292385 | ENSP00000350249 |
| ENSP00000292385 | ENSP00000359225 |
| ENSP00000292385 | ENSP00000373600 |
| ENSP00000292385 | ENSP00000377496 |
| ENSP00000292385 | ENSP00000386456 |
| ENSP00000292385 | ENSP00000411409 |
| ENSP00000292432 | ENSP00000310649 |
| ENSP00000292432 | ENSP00000312652 |
| ENSP00000292432 | ENSP00000336790 |
| ENSP00000292432 | ENSP00000339933 |
| ENSP00000292432 | ENSP00000364895 |
| ENSP00000292432 | ENSP00000377040 |
| ENSP00000292433 | ENSP00000344572 |
| ENSP00000292475 | ENSP00000300688 |
| ENSP00000292475 | ENSP00000301587 |
| ENSP00000292475 | ENSP00000306003 |
| ENSP00000292475 | ENSP00000317159 |
| ENSP00000292475 | ENSP00000317780 |
| ENSP00000292475 | ENSP00000318089 |
| ENSP00000292475 | ENSP00000329360 |
| ENSP00000292475 | ENSP00000337838 |
| ENSP00000292475 | ENSP00000341838 |
| ENSP00000292475 | ENSP00000343313 |
| ENSP00000292475 | ENSP00000346037 |
| ENSP00000292475 | ENSP00000349142 |

|                 |                 |
|-----------------|-----------------|
| ENSP00000292475 | ENSP00000358737 |
| ENSP00000292475 | ENSP00000361686 |
| ENSP00000292475 | ENSP00000364188 |
| ENSP00000292475 | ENSP00000365243 |
| ENSP00000292475 | ENSP00000370414 |
| ENSP00000292475 | ENSP00000385083 |
| ENSP00000292475 | ENSP00000389649 |
| ENSP00000292476 | ENSP00000296490 |
| ENSP00000292476 | ENSP00000296930 |
| ENSP00000292476 | ENSP00000298281 |
| ENSP00000292476 | ENSP00000300291 |
| ENSP00000292476 | ENSP00000304704 |
| ENSP00000292476 | ENSP00000315791 |
| ENSP00000292476 | ENSP00000317872 |
| ENSP00000292476 | ENSP00000325377 |
| ENSP00000292476 | ENSP00000331817 |
| ENSP00000292476 | ENSP00000332444 |
| ENSP00000292476 | ENSP00000336752 |
| ENSP00000292476 | ENSP00000339353 |
| ENSP00000292476 | ENSP00000348010 |
| ENSP00000292476 | ENSP00000355185 |
| ENSP00000292476 | ENSP00000356405 |
| ENSP00000292476 | ENSP00000358576 |
| ENSP00000292476 | ENSP00000367527 |
| ENSP00000292476 | ENSP00000398208 |
| ENSP00000292478 | ENSP00000298310 |
| ENSP00000292478 | ENSP00000299335 |
| ENSP00000292478 | ENSP00000301585 |
| ENSP00000292478 | ENSP00000325448 |
| ENSP00000292478 | ENSP00000354554 |
| ENSP00000292478 | ENSP00000356405 |
| ENSP00000292478 | ENSP00000361949 |
| ENSP00000292478 | ENSP00000363745 |
| ENSP00000292478 | ENSP00000380453 |
| ENSP00000292494 | ENSP00000354782 |
| ENSP00000292513 | ENSP00000360141 |
| ENSP00000292535 | ENSP00000293860 |
| ENSP00000292535 | ENSP00000303088 |
| ENSP00000292535 | ENSP00000308546 |
| ENSP00000292535 | ENSP00000315379 |
| ENSP00000292535 | ENSP00000315859 |
| ENSP00000292535 | ENSP00000317636 |
| ENSP00000292535 | ENSP00000320251 |
| ENSP00000292535 | ENSP00000324122 |
| ENSP00000292535 | ENSP00000341024 |
| ENSP00000292535 | ENSP00000344468 |

|                 |                 |
|-----------------|-----------------|
| ENSP00000292535 | ENSP00000347379 |
| ENSP00000292535 | ENSP00000351490 |
| ENSP00000292535 | ENSP00000355899 |
| ENSP00000292535 | ENSP00000363313 |
| ENSP00000292535 | ENSP00000365735 |
| ENSP00000292535 | ENSP00000381698 |
| ENSP00000292535 | ENSP00000402338 |
| ENSP00000292535 | ENSP00000407879 |
| ENSP00000292535 | ENSP00000408236 |
| ENSP00000292535 | ENSP00000410396 |
| ENSP00000292566 | ENSP00000356231 |
| ENSP00000292566 | ENSP00000364476 |
| ENSP00000292616 | ENSP00000360532 |
| ENSP00000292616 | ENSP00000374455 |
| ENSP00000292894 | ENSP00000330945 |
| ENSP00000293195 | ENSP00000320949 |
| ENSP00000293195 | ENSP00000329029 |
| ENSP00000293195 | ENSP00000340019 |
| ENSP00000293195 | ENSP00000342087 |
| ENSP00000293195 | ENSP00000357748 |
| ENSP00000293195 | ENSP00000359211 |
| ENSP00000293195 | ENSP00000359531 |
| ENSP00000293195 | ENSP00000372654 |
| ENSP00000293195 | ENSP00000377865 |
| ENSP00000293230 | ENSP00000380921 |
| ENSP00000293288 | ENSP00000298852 |
| ENSP00000293288 | ENSP00000306124 |
| ENSP00000293288 | ENSP00000308546 |
| ENSP00000293288 | ENSP00000309103 |
| ENSP00000293288 | ENSP00000318822 |
| ENSP00000293288 | ENSP00000326119 |
| ENSP00000293288 | ENSP00000329623 |
| ENSP00000293288 | ENSP00000334061 |
| ENSP00000293288 | ENSP00000338345 |
| ENSP00000293288 | ENSP00000340019 |
| ENSP00000293288 | ENSP00000340278 |
| ENSP00000293288 | ENSP00000348455 |
| ENSP00000293288 | ENSP00000352257 |
| ENSP00000293288 | ENSP00000358022 |
| ENSP00000293288 | ENSP00000361005 |
| ENSP00000293288 | ENSP00000363591 |
| ENSP00000293288 | ENSP00000378180 |
| ENSP00000293288 | ENSP00000401445 |
| ENSP00000293330 | ENSP00000307822 |
| ENSP00000293350 | ENSP00000311665 |
| ENSP00000293350 | ENSP00000343526 |

|                 |                 |
|-----------------|-----------------|
| ENSP00000293350 | ENSP00000366620 |
| ENSP00000293362 | ENSP00000298852 |
| ENSP00000293362 | ENSP00000307491 |
| ENSP00000293362 | ENSP00000308750 |
| ENSP00000293362 | ENSP00000314971 |
| ENSP00000293362 | ENSP00000324274 |
| ENSP00000293362 | ENSP00000325919 |
| ENSP00000293362 | ENSP00000328940 |
| ENSP00000293362 | ENSP00000334148 |
| ENSP00000293362 | ENSP00000335808 |
| ENSP00000293362 | ENSP00000336856 |
| ENSP00000293362 | ENSP00000341680 |
| ENSP00000293362 | ENSP00000343313 |
| ENSP00000293362 | ENSP00000352706 |
| ENSP00000293362 | ENSP00000354201 |
| ENSP00000293362 | ENSP00000355153 |
| ENSP00000293362 | ENSP00000355944 |
| ENSP00000293362 | ENSP00000362334 |
| ENSP00000293362 | ENSP00000363921 |
| ENSP00000293362 | ENSP00000368439 |
| ENSP00000293362 | ENSP00000370222 |
| ENSP00000293362 | ENSP00000372023 |
| ENSP00000293362 | ENSP00000384474 |
| ENSP00000293362 | ENSP00000386212 |
| ENSP00000293362 | ENSP00000417132 |
| ENSP00000293362 | ENSP00000417281 |
| ENSP00000293371 | ENSP00000294984 |
| ENSP00000293371 | ENSP00000295897 |
| ENSP00000293371 | ENSP00000304903 |
| ENSP00000293371 | ENSP00000311505 |
| ENSP00000293371 | ENSP00000312318 |
| ENSP00000293371 | ENSP00000347948 |
| ENSP00000293371 | ENSP00000354270 |
| ENSP00000293371 | ENSP00000379607 |
| ENSP00000293371 | ENSP00000417281 |
| ENSP00000293404 | ENSP00000293406 |
| ENSP00000293404 | ENSP00000338165 |
| ENSP00000293404 | ENSP00000387262 |
| ENSP00000293406 | ENSP00000295491 |
| ENSP00000293406 | ENSP00000296792 |
| ENSP00000293406 | ENSP00000298746 |
| ENSP00000293406 | ENSP00000300413 |
| ENSP00000293406 | ENSP00000307863 |
| ENSP00000293406 | ENSP00000308944 |
| ENSP00000293406 | ENSP00000309830 |
| ENSP00000293406 | ENSP00000310596 |

|                 |                 |
|-----------------|-----------------|
| ENSP00000293406 | ENSP00000312042 |
| ENSP00000293406 | ENSP00000320503 |
| ENSP00000293406 | ENSP00000324122 |
| ENSP00000293406 | ENSP00000325290 |
| ENSP00000293406 | ENSP00000326411 |
| ENSP00000293406 | ENSP00000326806 |
| ENSP00000293406 | ENSP00000327070 |
| ENSP00000293406 | ENSP00000328690 |
| ENSP00000293406 | ENSP00000332103 |
| ENSP00000293406 | ENSP00000341743 |
| ENSP00000293406 | ENSP00000342374 |
| ENSP00000293406 | ENSP00000351284 |
| ENSP00000293406 | ENSP00000352738 |
| ENSP00000293406 | ENSP00000356130 |
| ENSP00000293406 | ENSP00000358478 |
| ENSP00000293406 | ENSP00000358497 |
| ENSP00000293406 | ENSP00000358563 |
| ENSP00000293406 | ENSP00000359518 |
| ENSP00000293406 | ENSP00000361206 |
| ENSP00000293406 | ENSP00000361310 |
| ENSP00000293406 | ENSP00000361577 |
| ENSP00000293406 | ENSP00000361982 |
| ENSP00000293406 | ENSP00000362936 |
| ENSP00000293406 | ENSP00000362993 |
| ENSP00000293406 | ENSP00000364813 |
| ENSP00000293406 | ENSP00000366607 |
| ENSP00000293406 | ENSP00000366843 |
| ENSP00000293406 | ENSP00000370589 |
| ENSP00000293406 | ENSP00000372883 |
| ENSP00000293406 | ENSP00000373363 |
| ENSP00000293406 | ENSP00000377793 |
| ENSP00000293406 | ENSP00000380460 |
| ENSP00000293406 | ENSP00000391723 |
| ENSP00000293406 | ENSP00000397259 |
| ENSP00000293406 | ENSP00000400591 |
| ENSP00000293406 | ENSP00000402935 |
| ENSP00000293406 | ENSP00000403345 |
| ENSP00000293406 | ENSP00000406280 |
| ENSP00000293406 | ENSP00000410758 |
| ENSP00000293406 | ENSP00000412566 |
| ENSP00000293406 | ENSP00000414006 |
| ENSP00000293406 | ENSP00000414634 |
| ENSP00000293441 | ENSP00000296452 |
| ENSP00000293441 | ENSP00000306138 |
| ENSP00000293441 | ENSP00000340688 |
| ENSP00000293441 | ENSP00000345731 |

|                 |                 |
|-----------------|-----------------|
| ENSP00000293441 | ENSP00000354927 |
| ENSP00000293441 | ENSP00000361824 |
| ENSP00000293441 | ENSP00000362762 |
| ENSP00000293441 | ENSP00000363163 |
| ENSP00000293441 | ENSP00000364893 |
| ENSP00000293441 | ENSP00000365005 |
| ENSP00000293441 | ENSP00000365550 |
| ENSP00000293441 | ENSP00000381098 |
| ENSP00000293441 | ENSP00000381698 |
| ENSP00000293441 | ENSP00000382423 |
| ENSP00000293441 | ENSP00000400258 |
| ENSP00000293662 | ENSP00000304604 |
| ENSP00000293662 | ENSP00000306138 |
| ENSP00000293662 | ENSP00000367408 |
| ENSP00000293662 | ENSP00000408236 |
| ENSP00000293695 | ENSP00000385122 |
| ENSP00000293709 | ENSP00000314380 |
| ENSP00000293760 | ENSP00000357283 |
| ENSP00000293760 | ENSP00000380921 |
| ENSP00000293777 | ENSP00000297347 |
| ENSP00000293777 | ENSP00000300651 |
| ENSP00000293777 | ENSP00000308759 |
| ENSP00000293777 | ENSP00000312778 |
| ENSP00000293777 | ENSP00000323720 |
| ENSP00000293777 | ENSP00000325612 |
| ENSP00000293777 | ENSP00000326128 |
| ENSP00000293777 | ENSP00000326767 |
| ENSP00000293777 | ENSP00000337340 |
| ENSP00000293777 | ENSP00000342343 |
| ENSP00000293777 | ENSP00000357047 |
| ENSP00000293777 | ENSP00000357907 |
| ENSP00000293777 | ENSP00000362948 |
| ENSP00000293777 | ENSP00000363193 |
| ENSP00000293777 | ENSP00000381216 |
| ENSP00000293777 | ENSP00000384048 |
| ENSP00000293777 | ENSP00000391774 |
| ENSP00000293777 | ENSP00000392617 |
| ENSP00000293777 | ENSP00000418734 |
| ENSP00000293845 | ENSP00000300181 |
| ENSP00000293845 | ENSP00000380467 |
| ENSP00000293860 | ENSP00000296509 |
| ENSP00000293860 | ENSP00000299853 |
| ENSP00000293860 | ENSP00000301788 |
| ENSP00000293860 | ENSP00000302160 |
| ENSP00000293860 | ENSP00000302478 |
| ENSP00000293860 | ENSP00000303088 |



|                 |                 |
|-----------------|-----------------|
| ENSP00000293860 | ENSP00000314949 |
| ENSP00000293860 | ENSP00000318604 |
| ENSP00000293860 | ENSP00000324124 |
| ENSP00000293860 | ENSP00000331111 |
| ENSP00000293860 | ENSP00000334188 |
| ENSP00000293860 | ENSP00000334564 |
| ENSP00000293860 | ENSP00000335357 |
| ENSP00000293860 | ENSP00000342889 |
| ENSP00000293860 | ENSP00000347345 |
| ENSP00000293860 | ENSP00000350512 |
| ENSP00000293860 | ENSP00000351575 |
| ENSP00000293860 | ENSP00000354916 |
| ENSP00000293860 | ENSP00000357887 |
| ENSP00000293860 | ENSP00000359976 |
| ENSP00000293860 | ENSP00000360515 |
| ENSP00000293860 | ENSP00000361465 |
| ENSP00000293860 | ENSP00000366828 |
| ENSP00000293860 | ENSP00000367029 |
| ENSP00000293860 | ENSP00000370968 |
| ENSP00000293860 | ENSP00000378736 |
| ENSP00000293860 | ENSP00000383503 |
| ENSP00000293860 | ENSP00000386134 |
| ENSP00000293860 | ENSP00000397636 |
| ENSP00000293860 | ENSP00000405636 |
| ENSP00000293860 | ENSP00000410530 |
| ENSP00000293860 | ENSP00000410954 |
| ENSP00000293860 | ENSP00000414110 |
| ENSP00000293860 | ENSP00000416599 |
| ENSP00000293879 | ENSP00000298937 |
| ENSP00000293879 | ENSP00000304593 |
| ENSP00000293879 | ENSP00000357907 |
| ENSP00000293879 | ENSP00000360473 |
| ENSP00000293879 | ENSP00000386759 |
| ENSP00000293879 | ENSP00000396937 |
| ENSP00000293883 | ENSP00000318861 |
| ENSP00000293883 | ENSP00000339881 |
| ENSP00000293883 | ENSP00000360286 |
| ENSP00000293883 | ENSP00000371169 |
| ENSP00000293883 | ENSP00000371546 |
| ENSP00000293883 | ENSP00000382779 |
| ENSP00000294008 | ENSP00000295897 |
| ENSP00000294008 | ENSP00000296805 |
| ENSP00000294008 | ENSP00000300086 |
| ENSP00000294008 | ENSP00000301585 |
| ENSP00000294008 | ENSP00000301634 |
| ENSP00000294008 | ENSP00000301788 |

|                 |                 |
|-----------------|-----------------|
| ENSP00000294008 | ENSP00000301843 |
| ENSP00000294008 | ENSP00000307525 |
| ENSP00000294008 | ENSP00000307853 |
| ENSP00000294008 | ENSP00000308546 |
| ENSP00000294008 | ENSP00000309555 |
| ENSP00000294008 | ENSP00000310448 |
| ENSP00000294008 | ENSP00000310520 |
| ENSP00000294008 | ENSP00000310668 |
| ENSP00000294008 | ENSP00000311245 |
| ENSP00000294008 | ENSP00000314311 |
| ENSP00000294008 | ENSP00000315383 |
| ENSP00000294008 | ENSP00000315397 |
| ENSP00000294008 | ENSP00000315931 |
| ENSP00000294008 | ENSP00000317376 |
| ENSP00000294008 | ENSP00000317904 |
| ENSP00000294008 | ENSP00000321503 |
| ENSP00000294008 | ENSP00000323527 |
| ENSP00000294008 | ENSP00000323687 |
| ENSP00000294008 | ENSP00000324122 |
| ENSP00000294008 | ENSP00000324422 |
| ENSP00000294008 | ENSP00000325002 |
| ENSP00000294008 | ENSP00000328690 |
| ENSP00000294008 | ENSP00000328940 |
| ENSP00000294008 | ENSP00000335557 |
| ENSP00000294008 | ENSP00000335808 |
| ENSP00000294008 | ENSP00000338814 |
| ENSP00000294008 | ENSP00000339897 |
| ENSP00000294008 | ENSP00000340278 |
| ENSP00000294008 | ENSP00000340879 |
| ENSP00000294008 | ENSP00000341138 |
| ENSP00000294008 | ENSP00000343701 |
| ENSP00000294008 | ENSP00000345895 |
| ENSP00000294008 | ENSP00000346437 |
| ENSP00000294008 | ENSP00000347408 |
| ENSP00000294008 | ENSP00000348163 |
| ENSP00000294008 | ENSP00000348565 |
| ENSP00000294008 | ENSP00000348577 |
| ENSP00000294008 | ENSP00000349486 |
| ENSP00000294008 | ENSP00000351416 |
| ENSP00000294008 | ENSP00000354045 |
| ENSP00000294008 | ENSP00000355607 |
| ENSP00000294008 | ENSP00000355759 |
| ENSP00000294008 | ENSP00000356807 |
| ENSP00000294008 | ENSP00000357597 |
| ENSP00000294008 | ENSP00000357789 |
| ENSP00000294008 | ENSP00000357823 |

|                 |                 |
|-----------------|-----------------|
| ENSP00000294008 | ENSP00000359225 |
| ENSP00000294008 | ENSP00000360498 |
| ENSP00000294008 | ENSP00000361658 |
| ENSP00000294008 | ENSP00000362036 |
| ENSP00000294008 | ENSP00000362041 |
| ENSP00000294008 | ENSP00000364037 |
| ENSP00000294008 | ENSP00000364847 |
| ENSP00000294008 | ENSP00000366863 |
| ENSP00000294008 | ENSP00000366953 |
| ENSP00000294008 | ENSP00000369042 |
| ENSP00000294008 | ENSP00000370543 |
| ENSP00000294008 | ENSP00000374455 |
| ENSP00000294008 | ENSP00000382779 |
| ENSP00000294008 | ENSP00000386520 |
| ENSP00000294008 | ENSP00000403359 |
| ENSP00000294008 | ENSP00000406888 |
| ENSP00000294008 | ENSP00000407401 |
| ENSP00000294008 | ENSP00000418823 |
| ENSP00000294016 | ENSP00000351015 |
| ENSP00000294016 | ENSP00000367208 |
| ENSP00000294053 | ENSP00000297185 |
| ENSP00000294053 | ENSP00000299767 |
| ENSP00000294053 | ENSP00000300107 |
| ENSP00000294053 | ENSP00000300648 |
| ENSP00000294053 | ENSP00000302896 |
| ENSP00000294053 | ENSP00000304102 |
| ENSP00000294053 | ENSP00000304370 |
| ENSP00000294053 | ENSP00000305958 |
| ENSP00000294053 | ENSP00000312356 |
| ENSP00000294053 | ENSP00000313490 |
| ENSP00000294053 | ENSP00000313603 |
| ENSP00000294053 | ENSP00000316240 |
| ENSP00000294053 | ENSP00000320650 |
| ENSP00000294053 | ENSP00000322570 |
| ENSP00000294053 | ENSP00000324792 |
| ENSP00000294053 | ENSP00000325448 |
| ENSP00000294053 | ENSP00000326981 |
| ENSP00000294053 | ENSP00000329558 |
| ENSP00000294053 | ENSP00000330343 |
| ENSP00000294053 | ENSP00000334044 |
| ENSP00000294053 | ENSP00000334148 |
| ENSP00000294053 | ENSP00000338533 |
| ENSP00000294053 | ENSP00000339484 |
| ENSP00000294053 | ENSP00000342026 |
| ENSP00000294053 | ENSP00000344431 |
| ENSP00000294053 | ENSP00000345793 |

|                 |                 |
|-----------------|-----------------|
| ENSP00000294053 | ENSP00000346791 |
| ENSP00000294053 | ENSP00000350708 |
| ENSP00000294053 | ENSP00000351697 |
| ENSP00000294053 | ENSP00000353826 |
| ENSP00000294053 | ENSP00000354977 |
| ENSP00000294053 | ENSP00000356811 |
| ENSP00000294053 | ENSP00000358478 |
| ENSP00000294053 | ENSP00000358812 |
| ENSP00000294053 | ENSP00000359345 |
| ENSP00000294053 | ENSP00000360329 |
| ENSP00000294053 | ENSP00000362041 |
| ENSP00000294053 | ENSP00000362413 |
| ENSP00000294053 | ENSP00000364815 |
| ENSP00000294053 | ENSP00000365007 |
| ENSP00000294053 | ENSP00000366179 |
| ENSP00000294053 | ENSP00000366249 |
| ENSP00000294053 | ENSP00000366395 |
| ENSP00000294053 | ENSP00000366620 |
| ENSP00000294053 | ENSP00000366800 |
| ENSP00000294053 | ENSP00000367208 |
| ENSP00000294053 | ENSP00000368349 |
| ENSP00000294053 | ENSP00000368523 |
| ENSP00000294053 | ENSP00000368646 |
| ENSP00000294053 | ENSP00000368699 |
| ENSP00000294053 | ENSP00000369038 |
| ENSP00000294053 | ENSP00000371451 |
| ENSP00000294053 | ENSP00000373039 |
| ENSP00000294053 | ENSP00000373082 |
| ENSP00000294053 | ENSP00000373918 |
| ENSP00000294053 | ENSP00000374280 |
| ENSP00000294053 | ENSP00000374455 |
| ENSP00000294053 | ENSP00000378605 |
| ENSP00000294053 | ENSP00000381003 |
| ENSP00000294053 | ENSP00000384211 |
| ENSP00000294053 | ENSP00000389065 |
| ENSP00000294053 | ENSP00000396152 |
| ENSP00000294053 | ENSP00000397441 |
| ENSP00000294053 | ENSP00000401121 |
| ENSP00000294053 | ENSP00000403359 |
| ENSP00000294053 | ENSP00000404381 |
| ENSP00000294053 | ENSP00000410416 |
| ENSP00000294053 | ENSP00000411327 |
| ENSP00000294053 | ENSP00000412553 |
| ENSP00000294053 | ENSP00000413319 |
| ENSP00000294053 | ENSP00000414373 |
| ENSP00000294053 | ENSP00000415316 |

|                 |                 |
|-----------------|-----------------|
| ENSP00000294119 | ENSP00000300896 |
| ENSP00000294119 | ENSP00000301764 |
| ENSP00000294119 | ENSP00000303279 |
| ENSP00000294119 | ENSP00000309031 |
| ENSP00000294119 | ENSP00000312981 |
| ENSP00000294119 | ENSP00000331487 |
| ENSP00000294119 | ENSP00000341551 |
| ENSP00000294119 | ENSP00000343001 |
| ENSP00000294119 | ENSP00000350283 |
| ENSP00000294119 | ENSP00000350708 |
| ENSP00000294119 | ENSP00000352408 |
| ENSP00000294119 | ENSP00000354775 |
| ENSP00000294119 | ENSP00000356146 |
| ENSP00000294119 | ENSP00000361990 |
| ENSP00000294119 | ENSP00000364403 |
| ENSP00000294119 | ENSP00000364486 |
| ENSP00000294119 | ENSP00000364794 |
| ENSP00000294119 | ENSP00000368797 |
| ENSP00000294119 | ENSP00000370258 |
| ENSP00000294119 | ENSP00000375881 |
| ENSP00000294119 | ENSP00000380460 |
| ENSP00000294119 | ENSP00000381045 |
| ENSP00000294129 | ENSP00000300574 |
| ENSP00000294129 | ENSP00000313829 |
| ENSP00000294129 | ENSP00000350512 |
| ENSP00000294129 | ENSP00000356694 |
| ENSP00000294129 | ENSP00000357650 |
| ENSP00000294129 | ENSP00000360500 |
| ENSP00000294129 | ENSP00000360798 |
| ENSP00000294129 | ENSP00000364893 |
| ENSP00000294129 | ENSP00000365891 |
| ENSP00000294129 | ENSP00000373347 |
| ENSP00000294129 | ENSP00000386722 |
| ENSP00000294129 | ENSP00000413625 |
| ENSP00000294168 | ENSP00000299424 |
| ENSP00000294168 | ENSP00000303315 |
| ENSP00000294168 | ENSP00000306983 |
| ENSP00000294168 | ENSP00000307684 |
| ENSP00000294168 | ENSP00000313420 |
| ENSP00000294168 | ENSP00000315791 |
| ENSP00000294168 | ENSP00000316114 |
| ENSP00000294168 | ENSP00000320949 |
| ENSP00000294168 | ENSP00000329933 |
| ENSP00000294168 | ENSP00000331310 |
| ENSP00000294168 | ENSP00000334061 |
| ENSP00000294168 | ENSP00000337405 |

|                 |                 |
|-----------------|-----------------|
| ENSP00000294168 | ENSP00000343741 |
| ENSP00000294168 | ENSP00000347733 |
| ENSP00000294168 | ENSP00000348010 |
| ENSP00000294168 | ENSP00000351575 |
| ENSP00000294168 | ENSP00000352121 |
| ENSP00000294168 | ENSP00000354558 |
| ENSP00000294168 | ENSP00000358886 |
| ENSP00000294168 | ENSP00000360515 |
| ENSP00000294168 | ENSP00000369695 |
| ENSP00000294168 | ENSP00000397259 |
| ENSP00000294168 | ENSP00000402515 |
| ENSP00000294179 | ENSP00000301281 |
| ENSP00000294179 | ENSP00000302176 |
| ENSP00000294179 | ENSP00000305255 |
| ENSP00000294179 | ENSP00000305647 |
| ENSP00000294179 | ENSP00000305810 |
| ENSP00000294179 | ENSP00000309031 |
| ENSP00000294179 | ENSP00000310521 |
| ENSP00000294179 | ENSP00000311134 |
| ENSP00000294179 | ENSP00000317714 |
| ENSP00000294179 | ENSP00000324628 |
| ENSP00000294179 | ENSP00000327309 |
| ENSP00000294179 | ENSP00000327716 |
| ENSP00000294179 | ENSP00000330945 |
| ENSP00000294179 | ENSP00000349131 |
| ENSP00000294179 | ENSP00000349887 |
| ENSP00000294179 | ENSP00000349970 |
| ENSP00000294179 | ENSP00000353073 |
| ENSP00000294179 | ENSP00000360183 |
| ENSP00000294179 | ENSP00000362399 |
| ENSP00000294179 | ENSP00000365943 |
| ENSP00000294179 | ENSP00000374529 |
| ENSP00000294179 | ENSP00000381293 |
| ENSP00000294179 | ENSP00000386918 |
| ENSP00000294179 | ENSP00000390783 |
| ENSP00000294179 | ENSP00000397441 |
| ENSP00000294189 | ENSP00000296674 |
| ENSP00000294189 | ENSP00000298283 |
| ENSP00000294189 | ENSP00000298310 |
| ENSP00000294189 | ENSP00000300151 |
| ENSP00000294189 | ENSP00000303315 |
| ENSP00000294189 | ENSP00000306548 |
| ENSP00000294189 | ENSP00000307889 |
| ENSP00000294189 | ENSP00000308897 |
| ENSP00000294189 | ENSP00000309334 |
| ENSP00000294189 | ENSP00000309830 |

|                 |                 |
|-----------------|-----------------|
| ENSP00000294189 | ENSP00000311430 |
| ENSP00000294189 | ENSP00000322419 |
| ENSP00000294189 | ENSP00000323687 |
| ENSP00000294189 | ENSP00000324122 |
| ENSP00000294189 | ENSP00000339095 |
| ENSP00000294189 | ENSP00000339795 |
| ENSP00000294189 | ENSP00000345156 |
| ENSP00000294189 | ENSP00000346015 |
| ENSP00000294189 | ENSP00000346022 |
| ENSP00000294189 | ENSP00000346027 |
| ENSP00000294189 | ENSP00000346037 |
| ENSP00000294189 | ENSP00000346088 |
| ENSP00000294189 | ENSP00000346120 |
| ENSP00000294189 | ENSP00000354525 |
| ENSP00000294189 | ENSP00000354739 |
| ENSP00000294189 | ENSP00000359345 |
| ENSP00000294189 | ENSP00000361076 |
| ENSP00000294189 | ENSP00000363018 |
| ENSP00000294189 | ENSP00000363676 |
| ENSP00000294189 | ENSP00000364320 |
| ENSP00000294189 | ENSP00000370589 |
| ENSP00000294189 | ENSP00000373404 |
| ENSP00000294189 | ENSP00000375730 |
| ENSP00000294189 | ENSP00000377640 |
| ENSP00000294189 | ENSP00000377865 |
| ENSP00000294189 | ENSP00000378160 |
| ENSP00000294189 | ENSP00000380156 |
| ENSP00000294189 | ENSP00000386717 |
| ENSP00000294189 | ENSP00000389103 |
| ENSP00000294189 | ENSP00000391723 |
| ENSP00000294189 | ENSP00000393393 |
| ENSP00000294189 | ENSP00000414321 |
| ENSP00000294309 | ENSP00000311200 |
| ENSP00000294339 | ENSP00000300574 |
| ENSP00000294339 | ENSP00000301459 |
| ENSP00000294339 | ENSP00000329357 |
| ENSP00000294339 | ENSP00000329715 |
| ENSP00000294339 | ENSP00000331057 |
| ENSP00000294339 | ENSP00000341024 |
| ENSP00000294339 | ENSP00000345681 |
| ENSP00000294339 | ENSP00000347184 |
| ENSP00000294339 | ENSP00000347733 |
| ENSP00000294339 | ENSP00000348657 |
| ENSP00000294339 | ENSP00000349049 |
| ENSP00000294339 | ENSP00000349723 |
| ENSP00000294339 | ENSP00000351250 |

|                 |                 |
|-----------------|-----------------|
| ENSP00000294339 | ENSP00000352257 |
| ENSP00000294339 | ENSP00000353622 |
| ENSP00000294339 | ENSP00000354522 |
| ENSP00000294339 | ENSP00000355759 |
| ENSP00000294339 | ENSP00000360371 |
| ENSP00000294339 | ENSP00000365877 |
| ENSP00000294339 | ENSP00000369716 |
| ENSP00000294339 | ENSP00000392466 |
| ENSP00000294409 | ENSP00000367408 |
| ENSP00000294409 | ENSP00000399968 |
| ENSP00000294484 | ENSP00000359100 |
| ENSP00000294484 | ENSP00000380702 |
| ENSP00000294507 | ENSP00000333298 |
| ENSP00000294507 | ENSP00000345530 |
| ENSP00000294507 | ENSP00000354782 |
| ENSP00000294507 | ENSP00000360798 |
| ENSP00000294543 | ENSP00000310551 |
| ENSP00000294543 | ENSP00000314036 |
| ENSP00000294543 | ENSP00000325369 |
| ENSP00000294543 | ENSP00000344055 |
| ENSP00000294543 | ENSP00000350199 |
| ENSP00000294543 | ENSP00000351926 |
| ENSP00000294543 | ENSP00000352603 |
| ENSP00000294543 | ENSP00000355963 |
| ENSP00000294543 | ENSP00000377148 |
| ENSP00000294543 | ENSP00000407879 |
| ENSP00000294664 | ENSP00000300249 |
| ENSP00000294664 | ENSP00000327009 |
| ENSP00000294664 | ENSP00000334188 |
| ENSP00000294664 | ENSP00000351665 |
| ENSP00000294664 | ENSP00000356579 |
| ENSP00000294664 | ENSP00000377793 |
| ENSP00000294702 | ENSP00000301280 |
| ENSP00000294702 | ENSP00000345681 |
| ENSP00000294702 | ENSP00000349049 |
| ENSP00000294702 | ENSP00000349465 |
| ENSP00000294702 | ENSP00000364895 |
| ENSP00000294724 | ENSP00000300413 |
| ENSP00000294724 | ENSP00000304226 |
| ENSP00000294724 | ENSP00000307900 |
| ENSP00000294724 | ENSP00000312735 |
| ENSP00000294724 | ENSP00000317904 |
| ENSP00000294724 | ENSP00000319341 |
| ENSP00000294724 | ENSP00000337838 |
| ENSP00000294724 | ENSP00000340019 |
| ENSP00000294724 | ENSP00000345464 |



|                 |                 |
|-----------------|-----------------|
| ENSP00000294724 | ENSP00000348455 |
| ENSP00000294724 | ENSP00000353622 |
| ENSP00000294724 | ENSP00000359100 |
| ENSP00000294724 | ENSP00000359691 |
| ENSP00000294724 | ENSP00000361418 |
| ENSP00000294724 | ENSP00000364813 |
| ENSP00000294724 | ENSP00000372883 |
| ENSP00000294724 | ENSP00000379607 |
| ENSP00000294724 | ENSP00000381932 |
| ENSP00000294724 | ENSP00000403345 |
| ENSP00000294724 | ENSP00000406280 |
| ENSP00000294724 | ENSP00000410758 |
| ENSP00000294724 | ENSP00000414006 |
| ENSP00000294724 | ENSP00000414634 |
| ENSP00000294728 | ENSP00000304915 |
| ENSP00000294740 | ENSP00000332931 |
| ENSP00000294740 | ENSP00000337340 |
| ENSP00000294740 | ENSP00000338157 |
| ENSP00000294740 | ENSP00000346986 |
| ENSP00000294740 | ENSP00000354782 |
| ENSP00000294740 | ENSP00000355601 |
| ENSP00000294740 | ENSP00000368253 |
| ENSP00000294740 | ENSP00000381031 |
| ENSP00000294753 | ENSP00000303088 |
| ENSP00000294753 | ENSP00000323074 |
| ENSP00000294753 | ENSP00000341280 |
| ENSP00000294753 | ENSP00000359837 |
| ENSP00000294785 | ENSP00000306864 |
| ENSP00000294785 | ENSP00000310729 |
| ENSP00000294785 | ENSP00000312435 |
| ENSP00000294785 | ENSP00000326366 |
| ENSP00000294785 | ENSP00000333298 |
| ENSP00000294785 | ENSP00000345229 |
| ENSP00000294785 | ENSP00000349022 |
| ENSP00000294785 | ENSP00000358105 |
| ENSP00000294785 | ENSP00000366395 |
| ENSP00000294785 | ENSP00000366460 |
| ENSP00000294785 | ENSP00000366603 |
| ENSP00000294785 | ENSP00000416097 |
| ENSP00000294811 | ENSP00000379607 |
| ENSP00000294848 | ENSP00000345681 |
| ENSP00000294848 | ENSP00000346065 |
| ENSP00000294848 | ENSP00000349208 |
| ENSP00000294952 | ENSP00000300738 |
| ENSP00000294973 | ENSP00000300086 |
| ENSP00000294973 | ENSP00000340879 |

|                 |                 |
|-----------------|-----------------|
| ENSP00000294973 | ENSP00000350249 |
| ENSP00000294973 | ENSP00000350928 |
| ENSP00000294973 | ENSP00000391723 |
| ENSP00000294973 | ENSP00000401508 |
| ENSP00000294984 | ENSP00000314976 |
| ENSP00000295025 | ENSP00000297185 |
| ENSP00000295025 | ENSP00000304311 |
| ENSP00000295025 | ENSP00000304803 |
| ENSP00000295025 | ENSP00000308236 |
| ENSP00000295025 | ENSP00000314556 |
| ENSP00000295025 | ENSP00000320758 |
| ENSP00000295025 | ENSP00000321203 |
| ENSP00000295025 | ENSP00000322532 |
| ENSP00000295025 | ENSP00000325612 |
| ENSP00000295025 | ENSP00000329357 |
| ENSP00000295025 | ENSP00000329967 |
| ENSP00000295025 | ENSP00000333122 |
| ENSP00000295025 | ENSP00000333633 |
| ENSP00000295025 | ENSP00000334061 |
| ENSP00000295025 | ENSP00000337065 |
| ENSP00000295025 | ENSP00000344456 |
| ENSP00000295025 | ENSP00000352516 |
| ENSP00000295025 | ENSP00000353622 |
| ENSP00000295025 | ENSP00000356623 |
| ENSP00000295025 | ENSP00000358997 |
| ENSP00000295025 | ENSP00000359531 |
| ENSP00000295025 | ENSP00000364893 |
| ENSP00000295025 | ENSP00000370736 |
| ENSP00000295025 | ENSP00000379607 |
| ENSP00000295025 | ENSP00000415836 |
| ENSP00000295030 | ENSP00000303511 |
| ENSP00000295030 | ENSP00000320885 |
| ENSP00000295030 | ENSP00000321449 |
| ENSP00000295030 | ENSP00000339435 |
| ENSP00000295030 | ENSP00000345702 |
| ENSP00000295030 | ENSP00000348762 |
| ENSP00000295030 | ENSP00000349016 |
| ENSP00000295030 | ENSP00000349543 |
| ENSP00000295030 | ENSP00000356563 |
| ENSP00000295030 | ENSP00000357051 |
| ENSP00000295030 | ENSP00000358312 |
| ENSP00000295030 | ENSP00000407401 |
| ENSP00000295050 | ENSP00000368438 |
| ENSP00000295065 | ENSP00000345988 |
| ENSP00000295065 | ENSP00000355596 |
| ENSP00000295065 | ENSP00000358799 |

|                 |                 |
|-----------------|-----------------|
| ENSP00000295065 | ENSP00000361076 |
| ENSP00000295066 | ENSP00000296490 |
| ENSP00000295066 | ENSP00000296786 |
| ENSP00000295066 | ENSP00000299601 |
| ENSP00000295066 | ENSP00000304593 |
| ENSP00000295066 | ENSP00000306983 |
| ENSP00000295066 | ENSP00000307208 |
| ENSP00000295066 | ENSP00000309141 |
| ENSP00000295066 | ENSP00000311496 |
| ENSP00000295066 | ENSP00000315379 |
| ENSP00000295066 | ENSP00000316109 |
| ENSP00000295066 | ENSP00000317087 |
| ENSP00000295066 | ENSP00000317334 |
| ENSP00000295066 | ENSP00000318222 |
| ENSP00000295066 | ENSP00000322242 |
| ENSP00000295066 | ENSP00000324792 |
| ENSP00000295066 | ENSP00000325677 |
| ENSP00000295066 | ENSP00000326261 |
| ENSP00000295066 | ENSP00000327716 |
| ENSP00000295066 | ENSP00000330343 |
| ENSP00000295066 | ENSP00000334188 |
| ENSP00000295066 | ENSP00000336868 |
| ENSP00000295066 | ENSP00000340896 |
| ENSP00000295066 | ENSP00000351596 |
| ENSP00000295066 | ENSP00000351894 |
| ENSP00000295066 | ENSP00000353622 |
| ENSP00000295066 | ENSP00000357887 |
| ENSP00000295066 | ENSP00000358147 |
| ENSP00000295066 | ENSP00000360515 |
| ENSP00000295066 | ENSP00000361276 |
| ENSP00000295066 | ENSP00000361748 |
| ENSP00000295066 | ENSP00000362127 |
| ENSP00000295066 | ENSP00000362166 |
| ENSP00000295066 | ENSP00000366135 |
| ENSP00000295066 | ENSP00000366434 |
| ENSP00000295066 | ENSP00000367029 |
| ENSP00000295066 | ENSP00000373340 |
| ENSP00000295066 | ENSP00000374213 |
| ENSP00000295066 | ENSP00000374529 |
| ENSP00000295066 | ENSP00000376946 |
| ENSP00000295066 | ENSP00000379217 |
| ENSP00000295066 | ENSP00000379607 |
| ENSP00000295066 | ENSP00000380460 |
| ENSP00000295066 | ENSP00000384048 |
| ENSP00000295066 | ENSP00000386759 |
| ENSP00000295066 | ENSP00000390475 |

|                 |                 |
|-----------------|-----------------|
| ENSP00000295066 | ENSP00000396749 |
| ENSP00000295066 | ENSP00000402240 |
| ENSP00000295066 | ENSP00000406293 |
| ENSP00000295079 | ENSP00000347948 |
| ENSP00000295079 | ENSP00000397435 |
| ENSP00000295117 | ENSP00000386722 |
| ENSP00000295119 | ENSP00000305255 |
| ENSP00000295119 | ENSP00000310668 |
| ENSP00000295119 | ENSP00000350512 |
| ENSP00000295121 | ENSP00000304350 |
| ENSP00000295121 | ENSP00000331087 |
| ENSP00000295121 | ENSP00000362546 |
| ENSP00000295121 | ENSP00000401566 |
| ENSP00000295131 | ENSP00000312735 |
| ENSP00000295131 | ENSP00000324124 |
| ENSP00000295131 | ENSP00000360116 |
| ENSP00000295131 | ENSP00000387006 |
| ENSP00000295131 | ENSP00000403852 |
| ENSP00000295148 | ENSP00000381045 |
| ENSP00000295206 | ENSP00000326296 |
| ENSP00000295206 | ENSP00000354586 |
| ENSP00000295206 | ENSP00000362588 |
| ENSP00000295206 | ENSP00000374240 |
| ENSP00000295240 | ENSP00000353701 |
| ENSP00000295240 | ENSP00000370031 |
| ENSP00000295321 | ENSP00000299601 |
| ENSP00000295321 | ENSP00000302478 |
| ENSP00000295321 | ENSP00000307491 |
| ENSP00000295321 | ENSP00000312735 |
| ENSP00000295321 | ENSP00000314949 |
| ENSP00000295321 | ENSP00000315768 |
| ENSP00000295321 | ENSP00000319104 |
| ENSP00000295321 | ENSP00000349213 |
| ENSP00000295321 | ENSP00000351250 |
| ENSP00000295321 | ENSP00000361465 |
| ENSP00000295321 | ENSP00000362900 |
| ENSP00000295321 | ENSP00000374280 |
| ENSP00000295321 | ENSP00000386759 |
| ENSP00000295367 | ENSP00000301607 |
| ENSP00000295367 | ENSP00000357731 |
| ENSP00000295367 | ENSP00000357753 |
| ENSP00000295373 | ENSP00000297591 |
| ENSP00000295373 | ENSP00000297990 |
| ENSP00000295373 | ENSP00000315674 |
| ENSP00000295373 | ENSP00000328854 |
| ENSP00000295373 | ENSP00000329466 |

|                 |                 |
|-----------------|-----------------|
| ENSP00000295373 | ENSP00000345917 |
| ENSP00000295373 | ENSP00000346120 |
| ENSP00000295373 | ENSP00000355541 |
| ENSP00000295373 | ENSP00000358812 |
| ENSP00000295373 | ENSP00000360031 |
| ENSP00000295373 | ENSP00000360532 |
| ENSP00000295408 | ENSP00000329668 |
| ENSP00000295408 | ENSP00000331831 |
| ENSP00000295408 | ENSP00000343785 |
| ENSP00000295408 | ENSP00000363708 |
| ENSP00000295408 | ENSP00000371341 |
| ENSP00000295408 | ENSP00000379372 |
| ENSP00000295440 | ENSP00000398028 |
| ENSP00000295488 | ENSP00000296805 |
| ENSP00000295488 | ENSP00000298139 |
| ENSP00000295488 | ENSP00000298746 |
| ENSP00000295488 | ENSP00000302160 |
| ENSP00000295488 | ENSP00000310448 |
| ENSP00000295488 | ENSP00000315379 |
| ENSP00000295488 | ENSP00000317636 |
| ENSP00000295488 | ENSP00000324122 |
| ENSP00000295488 | ENSP00000331087 |
| ENSP00000295488 | ENSP00000335321 |
| ENSP00000295488 | ENSP00000338788 |
| ENSP00000295488 | ENSP00000343557 |
| ENSP00000295488 | ENSP00000351137 |
| ENSP00000295488 | ENSP00000351492 |
| ENSP00000295488 | ENSP00000357631 |
| ENSP00000295488 | ENSP00000358554 |
| ENSP00000295488 | ENSP00000358563 |
| ENSP00000295488 | ENSP00000358810 |
| ENSP00000295488 | ENSP00000361982 |
| ENSP00000295488 | ENSP00000362110 |
| ENSP00000295488 | ENSP00000364289 |
| ENSP00000295488 | ENSP00000364543 |
| ENSP00000295488 | ENSP00000366557 |
| ENSP00000295488 | ENSP00000367835 |
| ENSP00000295488 | ENSP00000368565 |
| ENSP00000295488 | ENSP00000370589 |
| ENSP00000295488 | ENSP00000372316 |
| ENSP00000295488 | ENSP00000372827 |
| ENSP00000295488 | ENSP00000376973 |
| ENSP00000295488 | ENSP00000387006 |
| ENSP00000295488 | ENSP00000393953 |
| ENSP00000295488 | ENSP00000394400 |
| ENSP00000295488 | ENSP00000399530 |

|                 |                 |
|-----------------|-----------------|
| ENSP00000295488 | ENSP00000400626 |
| ENSP00000295488 | ENSP00000401566 |
| ENSP00000295488 | ENSP00000412310 |
| ENSP00000295491 | ENSP00000337127 |
| ENSP00000295491 | ENSP00000341692 |
| ENSP00000295491 | ENSP00000359000 |
| ENSP00000295491 | ENSP00000362036 |
| ENSP00000295491 | ENSP00000362208 |
| ENSP00000295491 | ENSP00000372445 |
| ENSP00000295550 | ENSP00000355180 |
| ENSP00000295633 | ENSP00000304236 |
| ENSP00000295640 | ENSP00000329466 |
| ENSP00000295640 | ENSP00000360147 |
| ENSP00000295640 | ENSP00000370517 |
| ENSP00000295641 | ENSP00000341551 |
| ENSP00000295641 | ENSP00000363089 |
| ENSP00000295645 | ENSP00000311343 |
| ENSP00000295645 | ENSP00000321320 |
| ENSP00000295645 | ENSP00000343190 |
| ENSP00000295645 | ENSP00000353998 |
| ENSP00000295645 | ENSP00000369335 |
| ENSP00000295682 | ENSP00000341213 |
| ENSP00000295682 | ENSP00000344106 |
| ENSP00000295682 | ENSP00000345656 |
| ENSP00000295682 | ENSP00000346874 |
| ENSP00000295682 | ENSP00000397435 |
| ENSP00000295685 | ENSP00000298910 |
| ENSP00000295685 | ENSP00000301843 |
| ENSP00000295685 | ENSP00000326238 |
| ENSP00000295685 | ENSP00000330343 |
| ENSP00000295685 | ENSP00000331201 |
| ENSP00000295685 | ENSP00000337340 |
| ENSP00000295685 | ENSP00000341243 |
| ENSP00000295685 | ENSP00000349465 |
| ENSP00000295685 | ENSP00000350757 |
| ENSP00000295685 | ENSP00000360821 |
| ENSP00000295685 | ENSP00000365025 |
| ENSP00000295685 | ENSP00000365147 |
| ENSP00000295685 | ENSP00000365891 |
| ENSP00000295685 | ENSP00000373600 |
| ENSP00000295685 | ENSP00000380431 |
| ENSP00000295685 | ENSP00000382177 |
| ENSP00000295702 | ENSP00000296255 |
| ENSP00000295702 | ENSP00000299767 |
| ENSP00000295702 | ENSP00000317331 |
| ENSP00000295702 | ENSP00000327070 |

|                 |                 |
|-----------------|-----------------|
| ENSP00000295702 | ENSP00000328023 |
| ENSP00000295702 | ENSP00000349142 |
| ENSP00000295702 | ENSP00000361686 |
| ENSP00000295702 | ENSP00000364188 |
| ENSP00000295702 | ENSP00000370607 |
| ENSP00000295702 | ENSP00000386918 |
| ENSP00000295704 | ENSP00000360116 |
| ENSP00000295709 | ENSP00000297261 |
| ENSP00000295709 | ENSP00000332353 |
| ENSP00000295709 | ENSP00000340954 |
| ENSP00000295709 | ENSP00000343818 |
| ENSP00000295709 | ENSP00000345530 |
| ENSP00000295709 | ENSP00000354586 |
| ENSP00000295709 | ENSP00000355866 |
| ENSP00000295709 | ENSP00000358918 |
| ENSP00000295709 | ENSP00000379228 |
| ENSP00000295743 | ENSP00000297261 |
| ENSP00000295743 | ENSP00000305459 |
| ENSP00000295746 | ENSP00000378350 |
| ENSP00000295755 | ENSP00000334061 |
| ENSP00000295756 | ENSP00000334061 |
| ENSP00000295756 | ENSP00000354566 |
| ENSP00000295756 | ENSP00000354782 |
| ENSP00000295767 | ENSP00000299138 |
| ENSP00000295767 | ENSP00000307786 |
| ENSP00000295767 | ENSP00000320236 |
| ENSP00000295767 | ENSP00000321239 |
| ENSP00000295767 | ENSP00000325136 |
| ENSP00000295767 | ENSP00000342015 |
| ENSP00000295767 | ENSP00000355518 |
| ENSP00000295767 | ENSP00000360782 |
| ENSP00000295767 | ENSP00000361993 |
| ENSP00000295767 | ENSP00000365766 |
| ENSP00000295767 | ENSP00000368066 |
| ENSP00000295767 | ENSP00000377914 |
| ENSP00000295767 | ENSP00000387262 |
| ENSP00000295770 | ENSP00000296255 |
| ENSP00000295770 | ENSP00000299626 |
| ENSP00000295770 | ENSP00000319979 |
| ENSP00000295770 | ENSP00000326366 |
| ENSP00000295770 | ENSP00000331288 |
| ENSP00000295770 | ENSP00000333813 |
| ENSP00000295770 | ENSP00000340466 |
| ENSP00000295770 | ENSP00000344460 |
| ENSP00000295770 | ENSP00000360149 |
| ENSP00000295770 | ENSP00000360644 |

|                 |                 |
|-----------------|-----------------|
| ENSP00000295770 | ENSP00000362688 |
| ENSP00000295770 | ENSP00000364188 |
| ENSP00000295770 | ENSP00000366748 |
| ENSP00000295770 | ENSP00000380793 |
| ENSP00000295770 | ENSP00000385347 |
| ENSP00000295824 | ENSP00000340879 |
| ENSP00000295824 | ENSP00000355167 |
| ENSP00000295886 | ENSP00000403817 |
| ENSP00000295887 | ENSP00000304500 |
| ENSP00000295887 | ENSP00000345528 |
| ENSP00000295887 | ENSP00000361057 |
| ENSP00000295887 | ENSP00000364188 |
| ENSP00000295887 | ENSP00000370607 |
| ENSP00000295888 | ENSP00000338345 |
| ENSP00000295888 | ENSP00000343313 |
| ENSP00000295888 | ENSP00000347184 |
| ENSP00000295888 | ENSP00000374455 |
| ENSP00000295890 | ENSP00000298569 |
| ENSP00000295890 | ENSP00000317159 |
| ENSP00000295890 | ENSP00000318115 |
| ENSP00000295890 | ENSP00000319323 |
| ENSP00000295890 | ENSP00000320236 |
| ENSP00000295890 | ENSP00000328023 |
| ENSP00000295890 | ENSP00000332887 |
| ENSP00000295890 | ENSP00000345096 |
| ENSP00000295890 | ENSP00000346142 |
| ENSP00000295890 | ENSP00000348886 |
| ENSP00000295890 | ENSP00000352219 |
| ENSP00000295890 | ENSP00000354499 |
| ENSP00000295890 | ENSP00000354554 |
| ENSP00000295890 | ENSP00000354632 |
| ENSP00000295890 | ENSP00000354876 |
| ENSP00000295890 | ENSP00000354982 |
| ENSP00000295890 | ENSP00000356329 |
| ENSP00000295890 | ENSP00000356587 |
| ENSP00000295890 | ENSP00000356972 |
| ENSP00000295890 | ENSP00000358737 |
| ENSP00000295890 | ENSP00000365766 |
| ENSP00000295890 | ENSP00000366800 |
| ENSP00000295890 | ENSP00000370930 |
| ENSP00000295890 | ENSP00000371607 |
| ENSP00000295897 | ENSP00000296028 |
| ENSP00000295897 | ENSP00000296129 |
| ENSP00000295897 | ENSP00000300648 |
| ENSP00000295897 | ENSP00000301764 |
| ENSP00000295897 | ENSP00000303476 |



|                 |                 |
|-----------------|-----------------|
| ENSP00000295897 | ENSP00000303928 |
| ENSP00000295897 | ENSP00000306361 |
| ENSP00000295897 | ENSP00000306522 |
| ENSP00000295897 | ENSP00000310338 |
| ENSP00000295897 | ENSP00000311505 |
| ENSP00000295897 | ENSP00000319623 |
| ENSP00000295897 | ENSP00000320885 |
| ENSP00000295897 | ENSP00000320949 |
| ENSP00000295897 | ENSP00000325546 |
| ENSP00000295897 | ENSP00000326581 |
| ENSP00000295897 | ENSP00000328968 |
| ENSP00000295897 | ENSP00000335371 |
| ENSP00000295897 | ENSP00000339186 |
| ENSP00000295897 | ENSP00000341280 |
| ENSP00000295897 | ENSP00000343745 |
| ENSP00000295897 | ENSP00000346634 |
| ENSP00000295897 | ENSP00000346839 |
| ENSP00000295897 | ENSP00000350425 |
| ENSP00000295897 | ENSP00000350447 |
| ENSP00000295897 | ENSP00000353741 |
| ENSP00000295897 | ENSP00000353769 |
| ENSP00000295897 | ENSP00000354119 |
| ENSP00000295897 | ENSP00000354159 |
| ENSP00000295897 | ENSP00000355296 |
| ENSP00000295897 | ENSP00000355675 |
| ENSP00000295897 | ENSP00000356969 |
| ENSP00000295897 | ENSP00000358590 |
| ENSP00000295897 | ENSP00000359596 |
| ENSP00000295897 | ENSP00000360519 |
| ENSP00000295897 | ENSP00000366434 |
| ENSP00000295897 | ENSP00000367064 |
| ENSP00000295897 | ENSP00000368190 |
| ENSP00000295897 | ENSP00000371729 |
| ENSP00000295897 | ENSP00000373301 |
| ENSP00000295897 | ENSP00000378288 |
| ENSP00000295897 | ENSP00000379607 |
| ENSP00000295897 | ENSP00000387262 |
| ENSP00000295897 | ENSP00000389427 |
| ENSP00000295897 | ENSP00000393887 |
| ENSP00000295897 | ENSP00000396688 |
| ENSP00000295897 | ENSP00000397435 |
| ENSP00000295897 | ENSP00000398617 |
| ENSP00000295897 | ENSP00000411286 |
| ENSP00000295897 | ENSP00000416561 |
| ENSP00000295898 | ENSP00000379607 |
| ENSP00000295899 | ENSP00000342343 |

|                 |                 |
|-----------------|-----------------|
| ENSP00000295899 | ENSP00000362948 |
| ENSP00000295899 | ENSP00000367265 |
| ENSP00000295899 | ENSP00000380969 |
| ENSP00000295899 | ENSP00000386394 |
| ENSP00000295901 | ENSP00000298852 |
| ENSP00000295901 | ENSP00000304668 |
| ENSP00000295901 | ENSP00000307491 |
| ENSP00000295901 | ENSP00000309198 |
| ENSP00000295901 | ENSP00000309474 |
| ENSP00000295901 | ENSP00000310129 |
| ENSP00000295901 | ENSP00000311665 |
| ENSP00000295901 | ENSP00000321711 |
| ENSP00000295901 | ENSP00000328940 |
| ENSP00000295901 | ENSP00000348442 |
| ENSP00000295901 | ENSP00000350708 |
| ENSP00000295901 | ENSP00000356290 |
| ENSP00000295901 | ENSP00000359727 |
| ENSP00000295901 | ENSP00000360821 |
| ENSP00000295901 | ENSP00000362334 |
| ENSP00000295901 | ENSP00000369497 |
| ENSP00000295901 | ENSP00000370258 |
| ENSP00000295901 | ENSP00000370419 |
| ENSP00000295901 | ENSP00000371341 |
| ENSP00000295901 | ENSP00000375809 |
| ENSP00000295901 | ENSP00000378350 |
| ENSP00000295901 | ENSP00000378529 |
| ENSP00000295901 | ENSP00000381891 |
| ENSP00000295901 | ENSP00000384211 |
| ENSP00000295901 | ENSP00000386212 |
| ENSP00000295901 | ENSP00000396937 |
| ENSP00000295902 | ENSP00000310800 |
| ENSP00000295902 | ENSP00000313309 |
| ENSP00000295902 | ENSP00000333950 |
| ENSP00000295902 | ENSP00000334003 |
| ENSP00000295902 | ENSP00000366121 |
| ENSP00000295902 | ENSP00000396771 |
| ENSP00000295926 | ENSP00000299601 |
| ENSP00000295926 | ENSP00000302160 |
| ENSP00000295926 | ENSP00000318944 |
| ENSP00000295926 | ENSP00000320949 |
| ENSP00000295926 | ENSP00000323720 |
| ENSP00000295926 | ENSP00000325794 |
| ENSP00000295926 | ENSP00000342755 |
| ENSP00000295926 | ENSP00000348565 |
| ENSP00000295926 | ENSP00000353622 |
| ENSP00000295926 | ENSP00000354673 |

|                 |                 |
|-----------------|-----------------|
| ENSP00000295926 | ENSP00000356641 |
| ENSP00000295926 | ENSP00000358854 |
| ENSP00000295926 | ENSP00000381657 |
| ENSP00000295926 | ENSP00000386239 |
| ENSP00000295930 | ENSP00000296674 |
| ENSP00000295930 | ENSP00000302896 |
| ENSP00000295930 | ENSP00000311028 |
| ENSP00000295930 | ENSP00000318646 |
| ENSP00000295930 | ENSP00000323856 |
| ENSP00000295930 | ENSP00000331019 |
| ENSP00000295930 | ENSP00000339095 |
| ENSP00000295930 | ENSP00000341885 |
| ENSP00000295930 | ENSP00000346050 |
| ENSP00000295930 | ENSP00000346067 |
| ENSP00000295930 | ENSP00000362744 |
| ENSP00000295930 | ENSP00000363308 |
| ENSP00000295930 | ENSP00000364813 |
| ENSP00000295930 | ENSP00000369757 |
| ENSP00000295930 | ENSP00000379888 |
| ENSP00000295930 | ENSP00000393241 |
| ENSP00000295930 | ENSP00000394085 |
| ENSP00000295930 | ENSP00000403175 |
| ENSP00000295930 | ENSP00000412583 |
| ENSP00000295930 | ENSP00000414006 |
| ENSP00000295930 | ENSP00000414321 |
| ENSP00000295930 | ENSP00000416110 |
| ENSP00000295951 | ENSP00000296509 |
| ENSP00000295951 | ENSP00000296783 |
| ENSP00000295951 | ENSP00000297325 |
| ENSP00000295951 | ENSP00000298317 |
| ENSP00000295951 | ENSP00000299853 |
| ENSP00000295951 | ENSP00000300249 |
| ENSP00000295951 | ENSP00000300584 |
| ENSP00000295951 | ENSP00000301019 |
| ENSP00000295951 | ENSP00000310649 |
| ENSP00000295951 | ENSP00000314499 |
| ENSP00000295951 | ENSP00000315702 |
| ENSP00000295951 | ENSP00000318262 |
| ENSP00000295951 | ENSP00000322915 |
| ENSP00000295951 | ENSP00000323288 |
| ENSP00000295951 | ENSP00000324020 |
| ENSP00000295951 | ENSP00000324956 |
| ENSP00000295951 | ENSP00000326296 |
| ENSP00000295951 | ENSP00000329933 |
| ENSP00000295951 | ENSP00000335357 |
| ENSP00000295951 | ENSP00000336587 |

|                 |                 |
|-----------------|-----------------|
| ENSP00000295951 | ENSP00000340305 |
| ENSP00000295951 | ENSP00000341848 |
| ENSP00000295951 | ENSP00000343362 |
| ENSP00000295951 | ENSP00000346255 |
| ENSP00000295951 | ENSP00000348965 |
| ENSP00000295951 | ENSP00000350071 |
| ENSP00000295951 | ENSP00000350094 |
| ENSP00000295951 | ENSP00000350708 |
| ENSP00000295951 | ENSP00000352676 |
| ENSP00000295951 | ENSP00000354158 |
| ENSP00000295951 | ENSP00000354486 |
| ENSP00000295951 | ENSP00000354558 |
| ENSP00000295951 | ENSP00000354673 |
| ENSP00000295951 | ENSP00000354916 |
| ENSP00000295951 | ENSP00000355388 |
| ENSP00000295951 | ENSP00000355922 |
| ENSP00000295951 | ENSP00000358810 |
| ENSP00000295951 | ENSP00000361465 |
| ENSP00000295951 | ENSP00000371388 |
| ENSP00000295951 | ENSP00000371888 |
| ENSP00000295951 | ENSP00000373331 |
| ENSP00000295951 | ENSP00000384015 |
| ENSP00000295951 | ENSP00000402084 |
| ENSP00000295951 | ENSP00000403397 |
| ENSP00000295951 | ENSP00000414402 |
| ENSP00000295951 | ENSP00000417963 |
| ENSP00000295959 | ENSP00000317691 |
| ENSP00000295959 | ENSP00000350098 |
| ENSP00000295959 | ENSP00000367439 |
| ENSP00000295959 | ENSP00000369391 |
| ENSP00000295959 | ENSP00000389182 |
| ENSP00000295974 | ENSP00000341551 |
| ENSP00000295981 | ENSP00000320936 |
| ENSP00000295981 | ENSP00000337432 |
| ENSP00000295981 | ENSP00000345984 |
| ENSP00000295987 | ENSP00000300574 |
| ENSP00000295987 | ENSP00000320340 |
| ENSP00000295987 | ENSP00000320758 |
| ENSP00000295987 | ENSP00000344055 |
| ENSP00000295987 | ENSP00000347232 |
| ENSP00000295987 | ENSP00000348602 |
| ENSP00000295987 | ENSP00000354158 |
| ENSP00000295987 | ENSP00000355133 |
| ENSP00000295987 | ENSP00000355865 |
| ENSP00000295987 | ENSP00000361824 |
| ENSP00000295987 | ENSP00000362399 |

|                 |                 |
|-----------------|-----------------|
| ENSP00000295987 | ENSP00000367408 |
| ENSP00000295989 | ENSP00000300648 |
| ENSP00000295989 | ENSP00000302790 |
| ENSP00000295989 | ENSP00000304500 |
| ENSP00000295989 | ENSP00000309198 |
| ENSP00000295989 | ENSP00000360621 |
| ENSP00000295989 | ENSP00000369042 |
| ENSP00000296015 | ENSP00000296215 |
| ENSP00000296015 | ENSP00000301740 |
| ENSP00000296015 | ENSP00000318861 |
| ENSP00000296015 | ENSP00000360464 |
| ENSP00000296015 | ENSP00000360488 |
| ENSP00000296015 | ENSP00000396301 |
| ENSP00000296028 | ENSP00000300651 |
| ENSP00000296028 | ENSP00000325002 |
| ENSP00000296028 | ENSP00000358042 |
| ENSP00000296043 | ENSP00000360532 |
| ENSP00000296084 | ENSP00000296930 |
| ENSP00000296084 | ENSP00000299138 |
| ENSP00000296084 | ENSP00000310668 |
| ENSP00000296084 | ENSP00000313420 |
| ENSP00000296084 | ENSP00000318115 |
| ENSP00000296084 | ENSP00000320084 |
| ENSP00000296084 | ENSP00000322730 |
| ENSP00000296084 | ENSP00000337353 |
| ENSP00000296084 | ENSP00000341637 |
| ENSP00000296084 | ENSP00000344456 |
| ENSP00000296084 | ENSP00000347581 |
| ENSP00000296084 | ENSP00000348965 |
| ENSP00000296084 | ENSP00000349932 |
| ENSP00000296084 | ENSP00000352425 |
| ENSP00000296084 | ENSP00000353582 |
| ENSP00000296084 | ENSP00000354251 |
| ENSP00000296084 | ENSP00000355759 |
| ENSP00000296084 | ENSP00000358293 |
| ENSP00000296084 | ENSP00000362656 |
| ENSP00000296084 | ENSP00000363763 |
| ENSP00000296084 | ENSP00000364860 |
| ENSP00000296084 | ENSP00000366221 |
| ENSP00000296084 | ENSP00000368438 |
| ENSP00000296084 | ENSP00000377862 |
| ENSP00000296084 | ENSP00000406367 |
| ENSP00000296096 | ENSP00000331057 |
| ENSP00000296099 | ENSP00000312652 |
| ENSP00000296102 | ENSP00000300151 |
| ENSP00000296102 | ENSP00000305653 |

|                 |                 |
|-----------------|-----------------|
| ENSP00000296102 | ENSP00000308897 |
| ENSP00000296102 | ENSP00000312311 |
| ENSP00000296102 | ENSP00000354525 |
| ENSP00000296102 | ENSP00000357048 |
| ENSP00000296102 | ENSP00000372093 |
| ENSP00000296102 | ENSP00000373404 |
| ENSP00000296137 | ENSP00000311505 |
| ENSP00000296137 | ENSP00000314544 |
| ENSP00000296137 | ENSP00000328720 |
| ENSP00000296137 | ENSP00000349785 |
| ENSP00000296137 | ENSP00000353375 |
| ENSP00000296137 | ENSP00000357283 |
| ENSP00000296137 | ENSP00000358423 |
| ENSP00000296137 | ENSP00000358857 |
| ENSP00000296145 | ENSP00000296875 |
| ENSP00000296145 | ENSP00000320309 |
| ENSP00000296145 | ENSP00000336762 |
| ENSP00000296149 | ENSP00000353622 |
| ENSP00000296154 | ENSP00000306124 |
| ENSP00000296154 | ENSP00000342667 |
| ENSP00000296154 | ENSP00000388035 |
| ENSP00000296154 | ENSP00000406066 |
| ENSP00000296154 | ENSP00000411286 |
| ENSP00000296161 | ENSP00000347836 |
| ENSP00000296215 | ENSP00000301740 |
| ENSP00000296215 | ENSP00000302530 |
| ENSP00000296215 | ENSP00000310448 |
| ENSP00000296215 | ENSP00000315379 |
| ENSP00000296215 | ENSP00000315859 |
| ENSP00000296215 | ENSP00000324274 |
| ENSP00000296215 | ENSP00000325863 |
| ENSP00000296215 | ENSP00000335321 |
| ENSP00000296215 | ENSP00000339090 |
| ENSP00000296215 | ENSP00000339845 |
| ENSP00000296215 | ENSP00000341551 |
| ENSP00000296215 | ENSP00000343741 |
| ENSP00000296215 | ENSP00000343745 |
| ENSP00000296215 | ENSP00000351490 |
| ENSP00000296215 | ENSP00000351492 |
| ENSP00000296215 | ENSP00000353735 |
| ENSP00000296215 | ENSP00000356920 |
| ENSP00000296215 | ENSP00000359518 |
| ENSP00000296215 | ENSP00000370460 |
| ENSP00000296215 | ENSP00000373657 |
| ENSP00000296215 | ENSP00000377262 |
| ENSP00000296215 | ENSP00000382177 |

|                 |                 |
|-----------------|-----------------|
| ENSP00000296215 | ENSP00000396301 |
| ENSP00000296218 | ENSP00000337340 |
| ENSP00000296218 | ENSP00000347184 |
| ENSP00000296233 | ENSP00000398789 |
| ENSP00000296238 | ENSP00000310561 |
| ENSP00000296255 | ENSP00000299626 |
| ENSP00000296255 | ENSP00000299767 |
| ENSP00000296255 | ENSP00000304592 |
| ENSP00000296255 | ENSP00000306124 |
| ENSP00000296255 | ENSP00000317331 |
| ENSP00000296255 | ENSP00000317334 |
| ENSP00000296255 | ENSP00000319713 |
| ENSP00000296255 | ENSP00000319979 |
| ENSP00000296255 | ENSP00000320508 |
| ENSP00000296255 | ENSP00000332887 |
| ENSP00000296255 | ENSP00000333656 |
| ENSP00000296255 | ENSP00000333813 |
| ENSP00000296255 | ENSP00000335557 |
| ENSP00000296255 | ENSP00000337053 |
| ENSP00000296255 | ENSP00000339495 |
| ENSP00000296255 | ENSP00000339933 |
| ENSP00000296255 | ENSP00000340466 |
| ENSP00000296255 | ENSP00000341213 |
| ENSP00000296255 | ENSP00000341538 |
| ENSP00000296255 | ENSP00000347495 |
| ENSP00000296255 | ENSP00000356530 |
| ENSP00000296255 | ENSP00000359552 |
| ENSP00000296255 | ENSP00000360149 |
| ENSP00000296255 | ENSP00000360270 |
| ENSP00000296255 | ENSP00000360644 |
| ENSP00000296255 | ENSP00000361057 |
| ENSP00000296255 | ENSP00000361845 |
| ENSP00000296255 | ENSP00000362592 |
| ENSP00000296255 | ENSP00000362688 |
| ENSP00000296255 | ENSP00000364188 |
| ENSP00000296255 | ENSP00000370883 |
| ENSP00000296255 | ENSP00000377527 |
| ENSP00000296255 | ENSP00000379042 |
| ENSP00000296255 | ENSP00000380793 |
| ENSP00000296255 | ENSP00000382779 |
| ENSP00000296255 | ENSP00000401445 |
| ENSP00000296257 | ENSP00000296509 |
| ENSP00000296257 | ENSP00000298139 |
| ENSP00000296257 | ENSP00000308622 |
| ENSP00000296257 | ENSP00000313851 |
| ENSP00000296257 | ENSP00000316032 |

|                 |                 |
|-----------------|-----------------|
| ENSP00000296257 | ENSP00000317636 |
| ENSP00000296257 | ENSP00000318977 |
| ENSP00000296257 | ENSP00000322242 |
| ENSP00000296257 | ENSP00000325863 |
| ENSP00000296257 | ENSP00000330343 |
| ENSP00000296257 | ENSP00000331817 |
| ENSP00000296257 | ENSP00000336606 |
| ENSP00000296257 | ENSP00000336712 |
| ENSP00000296257 | ENSP00000343023 |
| ENSP00000296257 | ENSP00000343701 |
| ENSP00000296257 | ENSP00000343818 |
| ENSP00000296257 | ENSP00000346453 |
| ENSP00000296257 | ENSP00000347232 |
| ENSP00000296257 | ENSP00000347979 |
| ENSP00000296257 | ENSP00000348577 |
| ENSP00000296257 | ENSP00000350283 |
| ENSP00000296257 | ENSP00000351284 |
| ENSP00000296257 | ENSP00000352257 |
| ENSP00000296257 | ENSP00000354522 |
| ENSP00000296257 | ENSP00000356448 |
| ENSP00000296257 | ENSP00000359221 |
| ENSP00000296257 | ENSP00000361162 |
| ENSP00000296257 | ENSP00000365811 |
| ENSP00000296257 | ENSP00000368391 |
| ENSP00000296257 | ENSP00000369335 |
| ENSP00000296257 | ENSP00000369716 |
| ENSP00000296257 | ENSP00000376611 |
| ENSP00000296257 | ENSP00000376799 |
| ENSP00000296257 | ENSP00000377655 |
| ENSP00000296257 | ENSP00000396704 |
| ENSP00000296257 | ENSP00000402527 |
| ENSP00000296257 | ENSP00000417281 |
| ENSP00000296266 | ENSP00000311505 |
| ENSP00000296266 | ENSP00000362413 |
| ENSP00000296273 | ENSP00000296509 |
| ENSP00000296273 | ENSP00000300738 |
| ENSP00000296273 | ENSP00000302530 |
| ENSP00000296273 | ENSP00000306999 |
| ENSP00000296273 | ENSP00000307853 |
| ENSP00000296273 | ENSP00000308546 |
| ENSP00000296273 | ENSP00000309572 |
| ENSP00000296273 | ENSP00000310520 |
| ENSP00000296273 | ENSP00000311873 |
| ENSP00000296273 | ENSP00000313171 |
| ENSP00000296273 | ENSP00000317334 |
| ENSP00000296273 | ENSP00000318977 |



|                 |                 |
|-----------------|-----------------|
| ENSP00000296273 | ENSP00000321636 |
| ENSP00000296273 | ENSP00000322570 |
| ENSP00000296273 | ENSP00000330343 |
| ENSP00000296273 | ENSP00000337797 |
| ENSP00000296273 | ENSP00000339145 |
| ENSP00000296273 | ENSP00000343392 |
| ENSP00000296273 | ENSP00000343745 |
| ENSP00000296273 | ENSP00000344456 |
| ENSP00000296273 | ENSP00000347719 |
| ENSP00000296273 | ENSP00000347978 |
| ENSP00000296273 | ENSP00000349393 |
| ENSP00000296273 | ENSP00000349465 |
| ENSP00000296273 | ENSP00000350491 |
| ENSP00000296273 | ENSP00000351284 |
| ENSP00000296273 | ENSP00000351697 |
| ENSP00000296273 | ENSP00000351947 |
| ENSP00000296273 | ENSP00000352257 |
| ENSP00000296273 | ENSP00000354497 |
| ENSP00000296273 | ENSP00000354522 |
| ENSP00000296273 | ENSP00000355560 |
| ENSP00000296273 | ENSP00000355759 |
| ENSP00000296273 | ENSP00000356989 |
| ENSP00000296273 | ENSP00000360310 |
| ENSP00000296273 | ENSP00000360532 |
| ENSP00000296273 | ENSP00000360621 |
| ENSP00000296273 | ENSP00000363021 |
| ENSP00000296273 | ENSP00000364270 |
| ENSP00000296273 | ENSP00000366434 |
| ENSP00000296273 | ENSP00000366974 |
| ENSP00000296273 | ENSP00000367787 |
| ENSP00000296273 | ENSP00000368438 |
| ENSP00000296273 | ENSP00000368646 |
| ENSP00000296273 | ENSP00000369335 |
| ENSP00000296273 | ENSP00000369411 |
| ENSP00000296273 | ENSP00000370150 |
| ENSP00000296273 | ENSP00000370151 |
| ENSP00000296273 | ENSP00000371419 |
| ENSP00000296273 | ENSP00000374213 |
| ENSP00000296273 | ENSP00000377384 |
| ENSP00000296273 | ENSP00000377793 |
| ENSP00000296273 | ENSP00000382562 |
| ENSP00000296273 | ENSP00000384048 |
| ENSP00000296273 | ENSP00000396704 |
| ENSP00000296273 | ENSP00000406490 |
| ENSP00000296273 | ENSP00000420588 |
| ENSP00000296292 | ENSP00000296328 |

|                 |                 |
|-----------------|-----------------|
| ENSP00000296292 | ENSP00000314949 |
| ENSP00000296292 | ENSP00000354977 |
| ENSP00000296292 | ENSP00000355013 |
| ENSP00000296292 | ENSP00000360621 |
| ENSP00000296292 | ENSP00000371475 |
| ENSP00000296292 | ENSP00000417764 |
| ENSP00000296318 | ENSP00000358335 |
| ENSP00000296328 | ENSP00000298281 |
| ENSP00000296328 | ENSP00000298852 |
| ENSP00000296328 | ENSP00000299853 |
| ENSP00000296328 | ENSP00000301764 |
| ENSP00000296328 | ENSP00000302478 |
| ENSP00000296328 | ENSP00000303088 |
| ENSP00000296328 | ENSP00000303315 |
| ENSP00000296328 | ENSP00000309142 |
| ENSP00000296328 | ENSP00000310129 |
| ENSP00000296328 | ENSP00000311005 |
| ENSP00000296328 | ENSP00000315791 |
| ENSP00000296328 | ENSP00000318604 |
| ENSP00000296328 | ENSP00000323720 |
| ENSP00000296328 | ENSP00000325677 |
| ENSP00000296328 | ENSP00000329933 |
| ENSP00000296328 | ENSP00000330753 |
| ENSP00000296328 | ENSP00000331487 |
| ENSP00000296328 | ENSP00000334564 |
| ENSP00000296328 | ENSP00000337405 |
| ENSP00000296328 | ENSP00000338413 |
| ENSP00000296328 | ENSP00000340896 |
| ENSP00000296328 | ENSP00000342793 |
| ENSP00000296328 | ENSP00000347345 |
| ENSP00000296328 | ENSP00000347733 |
| ENSP00000296328 | ENSP00000347997 |
| ENSP00000296328 | ENSP00000350708 |
| ENSP00000296328 | ENSP00000350967 |
| ENSP00000296328 | ENSP00000351885 |
| ENSP00000296328 | ENSP00000353735 |
| ENSP00000296328 | ENSP00000354775 |
| ENSP00000296328 | ENSP00000354883 |
| ENSP00000296328 | ENSP00000356146 |
| ENSP00000296328 | ENSP00000356470 |
| ENSP00000296328 | ENSP00000357602 |
| ENSP00000296328 | ENSP00000358497 |
| ENSP00000296328 | ENSP00000359290 |
| ENSP00000296328 | ENSP00000359688 |
| ENSP00000296328 | ENSP00000359818 |
| ENSP00000296328 | ENSP00000360116 |

|                 |                 |
|-----------------|-----------------|
| ENSP00000296328 | ENSP00000360183 |
| ENSP00000296328 | ENSP00000360676 |
| ENSP00000296328 | ENSP00000361465 |
| ENSP00000296328 | ENSP00000361990 |
| ENSP00000296328 | ENSP00000362334 |
| ENSP00000296328 | ENSP00000362900 |
| ENSP00000296328 | ENSP00000363779 |
| ENSP00000296328 | ENSP00000364289 |
| ENSP00000296328 | ENSP00000364403 |
| ENSP00000296328 | ENSP00000366135 |
| ENSP00000296328 | ENSP00000366828 |
| ENSP00000296328 | ENSP00000368797 |
| ENSP00000296328 | ENSP00000369531 |
| ENSP00000296328 | ENSP00000370105 |
| ENSP00000296328 | ENSP00000375809 |
| ENSP00000296328 | ENSP00000375881 |
| ENSP00000296328 | ENSP00000378736 |
| ENSP00000296328 | ENSP00000379372 |
| ENSP00000296328 | ENSP00000380460 |
| ENSP00000296328 | ENSP00000384109 |
| ENSP00000296328 | ENSP00000395574 |
| ENSP00000296343 | ENSP00000348455 |
| ENSP00000296343 | ENSP00000355231 |
| ENSP00000296343 | ENSP00000367265 |
| ENSP00000296350 | ENSP00000363873 |
| ENSP00000296350 | ENSP00000367064 |
| ENSP00000296388 | ENSP00000307491 |
| ENSP00000296411 | ENSP00000296802 |
| ENSP00000296411 | ENSP00000307525 |
| ENSP00000296411 | ENSP00000310042 |
| ENSP00000296411 | ENSP00000310668 |
| ENSP00000296411 | ENSP00000325312 |
| ENSP00000296411 | ENSP00000327436 |
| ENSP00000296411 | ENSP00000329189 |
| ENSP00000296411 | ENSP00000339145 |
| ENSP00000296411 | ENSP00000339795 |
| ENSP00000296411 | ENSP00000346015 |
| ENSP00000296411 | ENSP00000346022 |
| ENSP00000296411 | ENSP00000346453 |
| ENSP00000296411 | ENSP00000346725 |
| ENSP00000296411 | ENSP00000348596 |
| ENSP00000296411 | ENSP00000348915 |
| ENSP00000296411 | ENSP00000351380 |
| ENSP00000296411 | ENSP00000354040 |
| ENSP00000296411 | ENSP00000358400 |
| ENSP00000296411 | ENSP00000359345 |

|                 |                 |
|-----------------|-----------------|
| ENSP00000296411 | ENSP00000360412 |
| ENSP00000296411 | ENSP00000361076 |
| ENSP00000296411 | ENSP00000362153 |
| ENSP00000296411 | ENSP00000363384 |
| ENSP00000296411 | ENSP00000363559 |
| ENSP00000296411 | ENSP00000364037 |
| ENSP00000296411 | ENSP00000370968 |
| ENSP00000296411 | ENSP00000377954 |
| ENSP00000296411 | ENSP00000379888 |
| ENSP00000296411 | ENSP00000386717 |
| ENSP00000296411 | ENSP00000389103 |
| ENSP00000296411 | ENSP00000402338 |
| ENSP00000296440 | ENSP00000296474 |
| ENSP00000296440 | ENSP00000353582 |
| ENSP00000296440 | ENSP00000380942 |
| ENSP00000296444 | ENSP00000350512 |
| ENSP00000296444 | ENSP00000417764 |
| ENSP00000296452 | ENSP00000357643 |
| ENSP00000296456 | ENSP00000310440 |
| ENSP00000296456 | ENSP00000330408 |
| ENSP00000296456 | ENSP00000348565 |
| ENSP00000296456 | ENSP00000369816 |
| ENSP00000296456 | ENSP00000386227 |
| ENSP00000296474 | ENSP00000298229 |
| ENSP00000296474 | ENSP00000343785 |
| ENSP00000296474 | ENSP00000379372 |
| ENSP00000296490 | ENSP00000301329 |
| ENSP00000296490 | ENSP00000308466 |
| ENSP00000296490 | ENSP00000309555 |
| ENSP00000296490 | ENSP00000311768 |
| ENSP00000296490 | ENSP00000312735 |
| ENSP00000296490 | ENSP00000314949 |
| ENSP00000296490 | ENSP00000315791 |
| ENSP00000296490 | ENSP00000317334 |
| ENSP00000296490 | ENSP00000317872 |
| ENSP00000296490 | ENSP00000325377 |
| ENSP00000296490 | ENSP00000325677 |
| ENSP00000296490 | ENSP00000331817 |
| ENSP00000296490 | ENSP00000332444 |
| ENSP00000296490 | ENSP00000336752 |
| ENSP00000296490 | ENSP00000336868 |
| ENSP00000296490 | ENSP00000339353 |
| ENSP00000296490 | ENSP00000340019 |
| ENSP00000296490 | ENSP00000340896 |
| ENSP00000296490 | ENSP00000344504 |
| ENSP00000296490 | ENSP00000349022 |

|                 |                 |
|-----------------|-----------------|
| ENSP00000296490 | ENSP00000360116 |
| ENSP00000296490 | ENSP00000360286 |
| ENSP00000296490 | ENSP00000362900 |
| ENSP00000296490 | ENSP00000366829 |
| ENSP00000296490 | ENSP00000371475 |
| ENSP00000296490 | ENSP00000373509 |
| ENSP00000296490 | ENSP00000381657 |
| ENSP00000296490 | ENSP00000384048 |
| ENSP00000296490 | ENSP00000384109 |
| ENSP00000296490 | ENSP00000390475 |
| ENSP00000296490 | ENSP00000391723 |
| ENSP00000296490 | ENSP00000407181 |
| ENSP00000296490 | ENSP00000411851 |
| ENSP00000296504 | ENSP00000329933 |
| ENSP00000296504 | ENSP00000339723 |
| ENSP00000296504 | ENSP00000340494 |
| ENSP00000296504 | ENSP00000344537 |
| ENSP00000296504 | ENSP00000347184 |
| ENSP00000296504 | ENSP00000347592 |
| ENSP00000296504 | ENSP00000347602 |
| ENSP00000296504 | ENSP00000348551 |
| ENSP00000296504 | ENSP00000351250 |
| ENSP00000296504 | ENSP00000353622 |
| ENSP00000296504 | ENSP00000362592 |
| ENSP00000296504 | ENSP00000364929 |
| ENSP00000296504 | ENSP00000395535 |
| ENSP00000296509 | ENSP00000296577 |
| ENSP00000296509 | ENSP00000297338 |
| ENSP00000296509 | ENSP00000297814 |
| ENSP00000296509 | ENSP00000298139 |
| ENSP00000296509 | ENSP00000300181 |
| ENSP00000296509 | ENSP00000300249 |
| ENSP00000296509 | ENSP00000300584 |
| ENSP00000296509 | ENSP00000301332 |
| ENSP00000296509 | ENSP00000304102 |
| ENSP00000296509 | ENSP00000304593 |
| ENSP00000296509 | ENSP00000304668 |
| ENSP00000296509 | ENSP00000306123 |
| ENSP00000296509 | ENSP00000306999 |
| ENSP00000296509 | ENSP00000307853 |
| ENSP00000296509 | ENSP00000308699 |
| ENSP00000296509 | ENSP00000308944 |
| ENSP00000296509 | ENSP00000309142 |
| ENSP00000296509 | ENSP00000309968 |
| ENSP00000296509 | ENSP00000310520 |
| ENSP00000296509 | ENSP00000311505 |

|                 |                 |
|-----------------|-----------------|
| ENSP00000296509 | ENSP00000312870 |
| ENSP00000296509 | ENSP00000313171 |
| ENSP00000296509 | ENSP00000313420 |
| ENSP00000296509 | ENSP00000314004 |
| ENSP00000296509 | ENSP00000316032 |
| ENSP00000296509 | ENSP00000317334 |
| ENSP00000296509 | ENSP00000317636 |
| ENSP00000296509 | ENSP00000318775 |
| ENSP00000296509 | ENSP00000320885 |
| ENSP00000296509 | ENSP00000321711 |
| ENSP00000296509 | ENSP00000322180 |
| ENSP00000296509 | ENSP00000323439 |
| ENSP00000296509 | ENSP00000324020 |
| ENSP00000296509 | ENSP00000325863 |
| ENSP00000296509 | ENSP00000327009 |
| ENSP00000296509 | ENSP00000327197 |
| ENSP00000296509 | ENSP00000330343 |
| ENSP00000296509 | ENSP00000333667 |
| ENSP00000296509 | ENSP00000333836 |
| ENSP00000296509 | ENSP00000334188 |
| ENSP00000296509 | ENSP00000334280 |
| ENSP00000296509 | ENSP00000334675 |
| ENSP00000296509 | ENSP00000335357 |
| ENSP00000296509 | ENSP00000335493 |
| ENSP00000296509 | ENSP00000336606 |
| ENSP00000296509 | ENSP00000336702 |
| ENSP00000296509 | ENSP00000336868 |
| ENSP00000296509 | ENSP00000337405 |
| ENSP00000296509 | ENSP00000339109 |
| ENSP00000296509 | ENSP00000340019 |
| ENSP00000296509 | ENSP00000340505 |
| ENSP00000296509 | ENSP00000340879 |
| ENSP00000296509 | ENSP00000341382 |
| ENSP00000296509 | ENSP00000341848 |
| ENSP00000296509 | ENSP00000342307 |
| ENSP00000296509 | ENSP00000343001 |
| ENSP00000296509 | ENSP00000343392 |
| ENSP00000296509 | ENSP00000343741 |
| ENSP00000296509 | ENSP00000346566 |
| ENSP00000296509 | ENSP00000347232 |
| ENSP00000296509 | ENSP00000347719 |
| ENSP00000296509 | ENSP00000347733 |
| ENSP00000296509 | ENSP00000348089 |
| ENSP00000296509 | ENSP00000348554 |
| ENSP00000296509 | ENSP00000348573 |
| ENSP00000296509 | ENSP00000348965 |

|                 |                 |
|-----------------|-----------------|
| ENSP00000296509 | ENSP00000349213 |
| ENSP00000296509 | ENSP00000350512 |
| ENSP00000296509 | ENSP00000351665 |
| ENSP00000296509 | ENSP00000351697 |
| ENSP00000296509 | ENSP00000352257 |
| ENSP00000296509 | ENSP00000352572 |
| ENSP00000296509 | ENSP00000353332 |
| ENSP00000296509 | ENSP00000353793 |
| ENSP00000296509 | ENSP00000354486 |
| ENSP00000296509 | ENSP00000354720 |
| ENSP00000296509 | ENSP00000354851 |
| ENSP00000296509 | ENSP00000354916 |
| ENSP00000296509 | ENSP00000355205 |
| ENSP00000296509 | ENSP00000355388 |
| ENSP00000296509 | ENSP00000355511 |
| ENSP00000296509 | ENSP00000355560 |
| ENSP00000296509 | ENSP00000355922 |
| ENSP00000296509 | ENSP00000355944 |
| ENSP00000296509 | ENSP00000356130 |
| ENSP00000296509 | ENSP00000356319 |
| ENSP00000296509 | ENSP00000356548 |
| ENSP00000296509 | ENSP00000356579 |
| ENSP00000296509 | ENSP00000356920 |
| ENSP00000296509 | ENSP00000356989 |
| ENSP00000296509 | ENSP00000357643 |
| ENSP00000296509 | ENSP00000357651 |
| ENSP00000296509 | ENSP00000357887 |
| ENSP00000296509 | ENSP00000358478 |
| ENSP00000296509 | ENSP00000358605 |
| ENSP00000296509 | ENSP00000358953 |
| ENSP00000296509 | ENSP00000360310 |
| ENSP00000296509 | ENSP00000360473 |
| ENSP00000296509 | ENSP00000360621 |
| ENSP00000296509 | ENSP00000361310 |
| ENSP00000296509 | ENSP00000361949 |
| ENSP00000296509 | ENSP00000362352 |
| ENSP00000296509 | ENSP00000363055 |
| ENSP00000296509 | ENSP00000363559 |
| ENSP00000296509 | ENSP00000363734 |
| ENSP00000296509 | ENSP00000365435 |
| ENSP00000296509 | ENSP00000366249 |
| ENSP00000296509 | ENSP00000366974 |
| ENSP00000296509 | ENSP00000367034 |
| ENSP00000296509 | ENSP00000368349 |
| ENSP00000296509 | ENSP00000368976 |
| ENSP00000296509 | ENSP00000369411 |

|                 |                 |
|-----------------|-----------------|
| ENSP00000296509 | ENSP00000369965 |
| ENSP00000296509 | ENSP00000370150 |
| ENSP00000296509 | ENSP00000370151 |
| ENSP00000296509 | ENSP00000370741 |
| ENSP00000296509 | ENSP00000371475 |
| ENSP00000296509 | ENSP00000372023 |
| ENSP00000296509 | ENSP00000372694 |
| ENSP00000296509 | ENSP00000374213 |
| ENSP00000296509 | ENSP00000374566 |
| ENSP00000296509 | ENSP00000375809 |
| ENSP00000296509 | ENSP00000377655 |
| ENSP00000296509 | ENSP00000377793 |
| ENSP00000296509 | ENSP00000378180 |
| ENSP00000296509 | ENSP00000378350 |
| ENSP00000296509 | ENSP00000382562 |
| ENSP00000296509 | ENSP00000383145 |
| ENSP00000296509 | ENSP00000384053 |
| ENSP00000296509 | ENSP00000394071 |
| ENSP00000296509 | ENSP00000394791 |
| ENSP00000296509 | ENSP00000396152 |
| ENSP00000296509 | ENSP00000402084 |
| ENSP00000296509 | ENSP00000402515 |
| ENSP00000296509 | ENSP00000402527 |
| ENSP00000296509 | ENSP00000410818 |
| ENSP00000296509 | ENSP00000412319 |
| ENSP00000296509 | ENSP00000414402 |
| ENSP00000296509 | ENSP00000415678 |
| ENSP00000296543 | ENSP00000297338 |
| ENSP00000296543 | ENSP00000298852 |
| ENSP00000296543 | ENSP00000302896 |
| ENSP00000296543 | ENSP00000309474 |
| ENSP00000296543 | ENSP00000311430 |
| ENSP00000296543 | ENSP00000314348 |
| ENSP00000296543 | ENSP00000323858 |
| ENSP00000296543 | ENSP00000323967 |
| ENSP00000296543 | ENSP00000327070 |
| ENSP00000296543 | ENSP00000329466 |
| ENSP00000296543 | ENSP00000331817 |
| ENSP00000296543 | ENSP00000335321 |
| ENSP00000296543 | ENSP00000339795 |
| ENSP00000296543 | ENSP00000348442 |
| ENSP00000296543 | ENSP00000348565 |
| ENSP00000296543 | ENSP00000352257 |
| ENSP00000296543 | ENSP00000352738 |
| ENSP00000296543 | ENSP00000358563 |
| ENSP00000296543 | ENSP00000358812 |



|                 |                 |
|-----------------|-----------------|
| ENSP00000296543 | ENSP00000360621 |
| ENSP00000296543 | ENSP00000362110 |
| ENSP00000296543 | ENSP00000363308 |
| ENSP00000296543 | ENSP00000370589 |
| ENSP00000296543 | ENSP00000370718 |
| ENSP00000296543 | ENSP00000381031 |
| ENSP00000296543 | ENSP00000384474 |
| ENSP00000296543 | ENSP00000385903 |
| ENSP00000296543 | ENSP00000392617 |
| ENSP00000296543 | ENSP00000399511 |
| ENSP00000296543 | ENSP00000408058 |
| ENSP00000296543 | ENSP00000417763 |
| ENSP00000296545 | ENSP00000369312 |
| ENSP00000296545 | ENSP00000416599 |
| ENSP00000296550 | ENSP00000297338 |
| ENSP00000296550 | ENSP00000309457 |
| ENSP00000296550 | ENSP00000340879 |
| ENSP00000296550 | ENSP00000342755 |
| ENSP00000296550 | ENSP00000355167 |
| ENSP00000296550 | ENSP00000357283 |
| ENSP00000296550 | ENSP00000382323 |
| ENSP00000296550 | ENSP00000402240 |
| ENSP00000296557 | ENSP00000360532 |
| ENSP00000296557 | ENSP00000379607 |
| ENSP00000296564 | ENSP00000359206 |
| ENSP00000296564 | ENSP00000359321 |
| ENSP00000296564 | ENSP00000380054 |
| ENSP00000296577 | ENSP00000296802 |
| ENSP00000296577 | ENSP00000298283 |
| ENSP00000296577 | ENSP00000299608 |
| ENSP00000296577 | ENSP00000300151 |
| ENSP00000296577 | ENSP00000303276 |
| ENSP00000296577 | ENSP00000304668 |
| ENSP00000296577 | ENSP00000306548 |
| ENSP00000296577 | ENSP00000307889 |
| ENSP00000296577 | ENSP00000308897 |
| ENSP00000296577 | ENSP00000309334 |
| ENSP00000296577 | ENSP00000310040 |
| ENSP00000296577 | ENSP00000311430 |
| ENSP00000296577 | ENSP00000317327 |
| ENSP00000296577 | ENSP00000322419 |
| ENSP00000296577 | ENSP00000323246 |
| ENSP00000296577 | ENSP00000323424 |
| ENSP00000296577 | ENSP00000323858 |
| ENSP00000296577 | ENSP00000325448 |
| ENSP00000296577 | ENSP00000329466 |

|                 |                 |
|-----------------|-----------------|
| ENSP00000296577 | ENSP00000333551 |
| ENSP00000296577 | ENSP00000339090 |
| ENSP00000296577 | ENSP00000339095 |
| ENSP00000296577 | ENSP00000339795 |
| ENSP00000296577 | ENSP00000346022 |
| ENSP00000296577 | ENSP00000346037 |
| ENSP00000296577 | ENSP00000346050 |
| ENSP00000296577 | ENSP00000346120 |
| ENSP00000296577 | ENSP00000348107 |
| ENSP00000296577 | ENSP00000352738 |
| ENSP00000296577 | ENSP00000353741 |
| ENSP00000296577 | ENSP00000354125 |
| ENSP00000296577 | ENSP00000354739 |
| ENSP00000296577 | ENSP00000355086 |
| ENSP00000296577 | ENSP00000356476 |
| ENSP00000296577 | ENSP00000356530 |
| ENSP00000296577 | ENSP00000356811 |
| ENSP00000296577 | ENSP00000358140 |
| ENSP00000296577 | ENSP00000361010 |
| ENSP00000296577 | ENSP00000361076 |
| ENSP00000296577 | ENSP00000362688 |
| ENSP00000296577 | ENSP00000362744 |
| ENSP00000296577 | ENSP00000363779 |
| ENSP00000296577 | ENSP00000364119 |
| ENSP00000296577 | ENSP00000364320 |
| ENSP00000296577 | ENSP00000365837 |
| ENSP00000296577 | ENSP00000369042 |
| ENSP00000296577 | ENSP00000369757 |
| ENSP00000296577 | ENSP00000370258 |
| ENSP00000296577 | ENSP00000372326 |
| ENSP00000296577 | ENSP00000373404 |
| ENSP00000296577 | ENSP00000374390 |
| ENSP00000296577 | ENSP00000375730 |
| ENSP00000296577 | ENSP00000377865 |
| ENSP00000296577 | ENSP00000379888 |
| ENSP00000296577 | ENSP00000395777 |
| ENSP00000296577 | ENSP00000414321 |
| ENSP00000296577 | ENSP00000417229 |
| ENSP00000296582 | ENSP00000297290 |
| ENSP00000296582 | ENSP00000343785 |
| ENSP00000296658 | ENSP00000304903 |
| ENSP00000296658 | ENSP00000322016 |
| ENSP00000296658 | ENSP00000379607 |
| ENSP00000296674 | ENSP00000296802 |
| ENSP00000296674 | ENSP00000296805 |
| ENSP00000296674 | ENSP00000297908 |

|                 |                 |
|-----------------|-----------------|
| ENSP00000296674 | ENSP00000298283 |
| ENSP00000296674 | ENSP00000300151 |
| ENSP00000296674 | ENSP00000302896 |
| ENSP00000296674 | ENSP00000308897 |
| ENSP00000296674 | ENSP00000311028 |
| ENSP00000296674 | ENSP00000312735 |
| ENSP00000296674 | ENSP00000314949 |
| ENSP00000296674 | ENSP00000317376 |
| ENSP00000296674 | ENSP00000318646 |
| ENSP00000296674 | ENSP00000323856 |
| ENSP00000296674 | ENSP00000326981 |
| ENSP00000296674 | ENSP00000329466 |
| ENSP00000296674 | ENSP00000331019 |
| ENSP00000296674 | ENSP00000336702 |
| ENSP00000296674 | ENSP00000337127 |
| ENSP00000296674 | ENSP00000339095 |
| ENSP00000296674 | ENSP00000341885 |
| ENSP00000296674 | ENSP00000345156 |
| ENSP00000296674 | ENSP00000346015 |
| ENSP00000296674 | ENSP00000346050 |
| ENSP00000296674 | ENSP00000346067 |
| ENSP00000296674 | ENSP00000354739 |
| ENSP00000296674 | ENSP00000355471 |
| ENSP00000296674 | ENSP00000356134 |
| ENSP00000296674 | ENSP00000356811 |
| ENSP00000296674 | ENSP00000358140 |
| ENSP00000296674 | ENSP00000359345 |
| ENSP00000296674 | ENSP00000361076 |
| ENSP00000296674 | ENSP00000361465 |
| ENSP00000296674 | ENSP00000362036 |
| ENSP00000296674 | ENSP00000362688 |
| ENSP00000296674 | ENSP00000362744 |
| ENSP00000296674 | ENSP00000363018 |
| ENSP00000296674 | ENSP00000363308 |
| ENSP00000296674 | ENSP00000364320 |
| ENSP00000296674 | ENSP00000368790 |
| ENSP00000296674 | ENSP00000368927 |
| ENSP00000296674 | ENSP00000369757 |
| ENSP00000296674 | ENSP00000372445 |
| ENSP00000296674 | ENSP00000377640 |
| ENSP00000296674 | ENSP00000379339 |
| ENSP00000296674 | ENSP00000379607 |
| ENSP00000296674 | ENSP00000379888 |
| ENSP00000296674 | ENSP00000380156 |
| ENSP00000296674 | ENSP00000388330 |
| ENSP00000296674 | ENSP00000389103 |

|                 |                 |
|-----------------|-----------------|
| ENSP00000296674 | ENSP00000393241 |
| ENSP00000296674 | ENSP00000403175 |
| ENSP00000296674 | ENSP00000408058 |
| ENSP00000296674 | ENSP00000412583 |
| ENSP00000296674 | ENSP00000414321 |
| ENSP00000296674 | ENSP00000416110 |
| ENSP00000296674 | ENSP00000420714 |
| ENSP00000296684 | ENSP00000308610 |
| ENSP00000296684 | ENSP00000315774 |
| ENSP00000296684 | ENSP00000356972 |
| ENSP00000296702 | ENSP00000296930 |
| ENSP00000296702 | ENSP00000299424 |
| ENSP00000296702 | ENSP00000300291 |
| ENSP00000296702 | ENSP00000300413 |
| ENSP00000296702 | ENSP00000301280 |
| ENSP00000296702 | ENSP00000303191 |
| ENSP00000296702 | ENSP00000304350 |
| ENSP00000296702 | ENSP00000304370 |
| ENSP00000296702 | ENSP00000305790 |
| ENSP00000296702 | ENSP00000307863 |
| ENSP00000296702 | ENSP00000308369 |
| ENSP00000296702 | ENSP00000314949 |
| ENSP00000296702 | ENSP00000316786 |
| ENSP00000296702 | ENSP00000318861 |
| ENSP00000296702 | ENSP00000318884 |
| ENSP00000296702 | ENSP00000319169 |
| ENSP00000296702 | ENSP00000319341 |
| ENSP00000296702 | ENSP00000320924 |
| ENSP00000296702 | ENSP00000322016 |
| ENSP00000296702 | ENSP00000325376 |
| ENSP00000296702 | ENSP00000329219 |
| ENSP00000296702 | ENSP00000332103 |
| ENSP00000296702 | ENSP00000334148 |
| ENSP00000296702 | ENSP00000335321 |
| ENSP00000296702 | ENSP00000337405 |
| ENSP00000296702 | ENSP00000339090 |
| ENSP00000296702 | ENSP00000342374 |
| ENSP00000296702 | ENSP00000346236 |
| ENSP00000296702 | ENSP00000347184 |
| ENSP00000296702 | ENSP00000349748 |
| ENSP00000296702 | ENSP00000351137 |
| ENSP00000296702 | ENSP00000357965 |
| ENSP00000296702 | ENSP00000358554 |
| ENSP00000296702 | ENSP00000360532 |
| ENSP00000296702 | ENSP00000361577 |
| ENSP00000296702 | ENSP00000362110 |

|                 |                 |
|-----------------|-----------------|
| ENSP00000296702 | ENSP00000364289 |
| ENSP00000296702 | ENSP00000365439 |
| ENSP00000296702 | ENSP00000365891 |
| ENSP00000296702 | ENSP00000366557 |
| ENSP00000296702 | ENSP00000366607 |
| ENSP00000296702 | ENSP00000368801 |
| ENSP00000296702 | ENSP00000369218 |
| ENSP00000296702 | ENSP00000369716 |
| ENSP00000296702 | ENSP00000370083 |
| ENSP00000296702 | ENSP00000373952 |
| ENSP00000296702 | ENSP00000381565 |
| ENSP00000296702 | ENSP00000383059 |
| ENSP00000296702 | ENSP00000386161 |
| ENSP00000296702 | ENSP00000390948 |
| ENSP00000296702 | ENSP00000391774 |
| ENSP00000296702 | ENSP00000412566 |
| ENSP00000296733 | ENSP00000301364 |
| ENSP00000296733 | ENSP00000310649 |
| ENSP00000296733 | ENSP00000343741 |
| ENSP00000296733 | ENSP00000370258 |
| ENSP00000296733 | ENSP00000382562 |
| ENSP00000296733 | ENSP00000402084 |
| ENSP00000296755 | ENSP00000300231 |
| ENSP00000296755 | ENSP00000304051 |
| ENSP00000296755 | ENSP00000306245 |
| ENSP00000296755 | ENSP00000307863 |
| ENSP00000296755 | ENSP00000308944 |
| ENSP00000296755 | ENSP00000309474 |
| ENSP00000296755 | ENSP00000311505 |
| ENSP00000296755 | ENSP00000312778 |
| ENSP00000296755 | ENSP00000318313 |
| ENSP00000296755 | ENSP00000322396 |
| ENSP00000296755 | ENSP00000324792 |
| ENSP00000296755 | ENSP00000329466 |
| ENSP00000296755 | ENSP00000330343 |
| ENSP00000296755 | ENSP00000334675 |
| ENSP00000296755 | ENSP00000336868 |
| ENSP00000296755 | ENSP00000338345 |
| ENSP00000296755 | ENSP00000343392 |
| ENSP00000296755 | ENSP00000343479 |
| ENSP00000296755 | ENSP00000347168 |
| ENSP00000296755 | ENSP00000348089 |
| ENSP00000296755 | ENSP00000350767 |
| ENSP00000296755 | ENSP00000351284 |
| ENSP00000296755 | ENSP00000351813 |
| ENSP00000296755 | ENSP00000352257 |

|                 |                 |
|-----------------|-----------------|
| ENSP00000296755 | ENSP00000352738 |
| ENSP00000296755 | ENSP00000357651 |
| ENSP00000296755 | ENSP00000360286 |
| ENSP00000296755 | ENSP00000360621 |
| ENSP00000296755 | ENSP00000360922 |
| ENSP00000296755 | ENSP00000364204 |
| ENSP00000296755 | ENSP00000366395 |
| ENSP00000296755 | ENSP00000366974 |
| ENSP00000296755 | ENSP00000367034 |
| ENSP00000296755 | ENSP00000368349 |
| ENSP00000296755 | ENSP00000372023 |
| ENSP00000296755 | ENSP00000378517 |
| ENSP00000296755 | ENSP00000379607 |
| ENSP00000296755 | ENSP00000390948 |
| ENSP00000296755 | ENSP00000392270 |
| ENSP00000296783 | ENSP00000298310 |
| ENSP00000296783 | ENSP00000309474 |
| ENSP00000296783 | ENSP00000313350 |
| ENSP00000296783 | ENSP00000314311 |
| ENSP00000296783 | ENSP00000314441 |
| ENSP00000296783 | ENSP00000316879 |
| ENSP00000296783 | ENSP00000322457 |
| ENSP00000296783 | ENSP00000322570 |
| ENSP00000296783 | ENSP00000339845 |
| ENSP00000296783 | ENSP00000341885 |
| ENSP00000296783 | ENSP00000343741 |
| ENSP00000296783 | ENSP00000343745 |
| ENSP00000296783 | ENSP00000351697 |
| ENSP00000296783 | ENSP00000354040 |
| ENSP00000296783 | ENSP00000354522 |
| ENSP00000296783 | ENSP00000356146 |
| ENSP00000296783 | ENSP00000357484 |
| ENSP00000296783 | ENSP00000358812 |
| ENSP00000296783 | ENSP00000366135 |
| ENSP00000296783 | ENSP00000366519 |
| ENSP00000296783 | ENSP00000368349 |
| ENSP00000296783 | ENSP00000369887 |
| ENSP00000296783 | ENSP00000370151 |
| ENSP00000296783 | ENSP00000370408 |
| ENSP00000296783 | ENSP00000370741 |
| ENSP00000296783 | ENSP00000372023 |
| ENSP00000296783 | ENSP00000373404 |
| ENSP00000296783 | ENSP00000380982 |
| ENSP00000296785 | ENSP00000348010 |
| ENSP00000296785 | ENSP00000361548 |
| ENSP00000296786 | ENSP00000296792 |

|                 |                 |
|-----------------|-----------------|
| ENSP00000296786 | ENSP00000299259 |
| ENSP00000296786 | ENSP00000300181 |
| ENSP00000296786 | ENSP00000300648 |
| ENSP00000296786 | ENSP00000302790 |
| ENSP00000296786 | ENSP00000304593 |
| ENSP00000296786 | ENSP00000309198 |
| ENSP00000296786 | ENSP00000310129 |
| ENSP00000296786 | ENSP00000322242 |
| ENSP00000296786 | ENSP00000325677 |
| ENSP00000296786 | ENSP00000334061 |
| ENSP00000296786 | ENSP00000347836 |
| ENSP00000296786 | ENSP00000348442 |
| ENSP00000296786 | ENSP00000350967 |
| ENSP00000296786 | ENSP00000351596 |
| ENSP00000296786 | ENSP00000353622 |
| ENSP00000296786 | ENSP00000354673 |
| ENSP00000296786 | ENSP00000356405 |
| ENSP00000296786 | ENSP00000356641 |
| ENSP00000296786 | ENSP00000360116 |
| ENSP00000296786 | ENSP00000362334 |
| ENSP00000296786 | ENSP00000368959 |
| ENSP00000296786 | ENSP00000374213 |
| ENSP00000296786 | ENSP00000374280 |
| ENSP00000296786 | ENSP00000380460 |
| ENSP00000296786 | ENSP00000382779 |
| ENSP00000296786 | ENSP00000384211 |
| ENSP00000296792 | ENSP00000297579 |
| ENSP00000296792 | ENSP00000297990 |
| ENSP00000296792 | ENSP00000298937 |
| ENSP00000296792 | ENSP00000301364 |
| ENSP00000296792 | ENSP00000304593 |
| ENSP00000296792 | ENSP00000308179 |
| ENSP00000296792 | ENSP00000311135 |
| ENSP00000296792 | ENSP00000314193 |
| ENSP00000296792 | ENSP00000315674 |
| ENSP00000296792 | ENSP00000318604 |
| ENSP00000296792 | ENSP00000326981 |
| ENSP00000296792 | ENSP00000327179 |
| ENSP00000296792 | ENSP00000328690 |
| ENSP00000296792 | ENSP00000328854 |
| ENSP00000296792 | ENSP00000329466 |
| ENSP00000296792 | ENSP00000339095 |
| ENSP00000296792 | ENSP00000339145 |
| ENSP00000296792 | ENSP00000346725 |
| ENSP00000296792 | ENSP00000350967 |
| ENSP00000296792 | ENSP00000353246 |

|                 |                 |
|-----------------|-----------------|
| ENSP00000296792 | ENSP00000354040 |
| ENSP00000296792 | ENSP00000355471 |
| ENSP00000296792 | ENSP00000355541 |
| ENSP00000296792 | ENSP00000357907 |
| ENSP00000296792 | ENSP00000360031 |
| ENSP00000296792 | ENSP00000360473 |
| ENSP00000296792 | ENSP00000362744 |
| ENSP00000296792 | ENSP00000363642 |
| ENSP00000296792 | ENSP00000363746 |
| ENSP00000296792 | ENSP00000363779 |
| ENSP00000296792 | ENSP00000366557 |
| ENSP00000296792 | ENSP00000370258 |
| ENSP00000296792 | ENSP00000370589 |
| ENSP00000296792 | ENSP00000370968 |
| ENSP00000296792 | ENSP00000371101 |
| ENSP00000296792 | ENSP00000372695 |
| ENSP00000296792 | ENSP00000379888 |
| ENSP00000296792 | ENSP00000380460 |
| ENSP00000296792 | ENSP00000384302 |
| ENSP00000296792 | ENSP00000386759 |
| ENSP00000296792 | ENSP00000387006 |
| ENSP00000296792 | ENSP00000396937 |
| ENSP00000296792 | ENSP00000398597 |
| ENSP00000296792 | ENSP00000399454 |
| ENSP00000296792 | ENSP00000402869 |
| ENSP00000296792 | ENSP00000405614 |
| ENSP00000296802 | ENSP00000297990 |
| ENSP00000296802 | ENSP00000298283 |
| ENSP00000296802 | ENSP00000298746 |
| ENSP00000296802 | ENSP00000300151 |
| ENSP00000296802 | ENSP00000301364 |
| ENSP00000296802 | ENSP00000302886 |
| ENSP00000296802 | ENSP00000302896 |
| ENSP00000296802 | ENSP00000305682 |
| ENSP00000296802 | ENSP00000305702 |
| ENSP00000296802 | ENSP00000306548 |
| ENSP00000296802 | ENSP00000307889 |
| ENSP00000296802 | ENSP00000308897 |
| ENSP00000296802 | ENSP00000309334 |
| ENSP00000296802 | ENSP00000309830 |
| ENSP00000296802 | ENSP00000311028 |
| ENSP00000296802 | ENSP00000311430 |
| ENSP00000296802 | ENSP00000314311 |
| ENSP00000296802 | ENSP00000314348 |
| ENSP00000296802 | ENSP00000315674 |
| ENSP00000296802 | ENSP00000317376 |



|                 |                 |
|-----------------|-----------------|
| ENSP00000296802 | ENSP00000317992 |
| ENSP00000296802 | ENSP00000318646 |
| ENSP00000296802 | ENSP00000320917 |
| ENSP00000296802 | ENSP00000323856 |
| ENSP00000296802 | ENSP00000323858 |
| ENSP00000296802 | ENSP00000325312 |
| ENSP00000296802 | ENSP00000326981 |
| ENSP00000296802 | ENSP00000328690 |
| ENSP00000296802 | ENSP00000328854 |
| ENSP00000296802 | ENSP00000329466 |
| ENSP00000296802 | ENSP00000331019 |
| ENSP00000296802 | ENSP00000332340 |
| ENSP00000296802 | ENSP00000334188 |
| ENSP00000296802 | ENSP00000338573 |
| ENSP00000296802 | ENSP00000338862 |
| ENSP00000296802 | ENSP00000339095 |
| ENSP00000296802 | ENSP00000339145 |
| ENSP00000296802 | ENSP00000339795 |
| ENSP00000296802 | ENSP00000341885 |
| ENSP00000296802 | ENSP00000343081 |
| ENSP00000296802 | ENSP00000345096 |
| ENSP00000296802 | ENSP00000345156 |
| ENSP00000296802 | ENSP00000346015 |
| ENSP00000296802 | ENSP00000346022 |
| ENSP00000296802 | ENSP00000346050 |
| ENSP00000296802 | ENSP00000346067 |
| ENSP00000296802 | ENSP00000346120 |
| ENSP00000296802 | ENSP00000346236 |
| ENSP00000296802 | ENSP00000346453 |
| ENSP00000296802 | ENSP00000346725 |
| ENSP00000296802 | ENSP00000348596 |
| ENSP00000296802 | ENSP00000348722 |
| ENSP00000296802 | ENSP00000352021 |
| ENSP00000296802 | ENSP00000354040 |
| ENSP00000296802 | ENSP00000354125 |
| ENSP00000296802 | ENSP00000354739 |
| ENSP00000296802 | ENSP00000358140 |
| ENSP00000296802 | ENSP00000358563 |
| ENSP00000296802 | ENSP00000358812 |
| ENSP00000296802 | ENSP00000359345 |
| ENSP00000296802 | ENSP00000360031 |
| ENSP00000296802 | ENSP00000360828 |
| ENSP00000296802 | ENSP00000361076 |
| ENSP00000296802 | ENSP00000361092 |
| ENSP00000296802 | ENSP00000361232 |
| ENSP00000296802 | ENSP00000361982 |

|                 |                 |
|-----------------|-----------------|
| ENSP00000296802 | ENSP00000362153 |
| ENSP00000296802 | ENSP00000362744 |
| ENSP00000296802 | ENSP00000363018 |
| ENSP00000296802 | ENSP00000363384 |
| ENSP00000296802 | ENSP00000363559 |
| ENSP00000296802 | ENSP00000363676 |
| ENSP00000296802 | ENSP00000364293 |
| ENSP00000296802 | ENSP00000364320 |
| ENSP00000296802 | ENSP00000365806 |
| ENSP00000296802 | ENSP00000366519 |
| ENSP00000296802 | ENSP00000366557 |
| ENSP00000296802 | ENSP00000369757 |
| ENSP00000296802 | ENSP00000369965 |
| ENSP00000296802 | ENSP00000370258 |
| ENSP00000296802 | ENSP00000371101 |
| ENSP00000296802 | ENSP00000371169 |
| ENSP00000296802 | ENSP00000373090 |
| ENSP00000296802 | ENSP00000373404 |
| ENSP00000296802 | ENSP00000375730 |
| ENSP00000296802 | ENSP00000377640 |
| ENSP00000296802 | ENSP00000379339 |
| ENSP00000296802 | ENSP00000382392 |
| ENSP00000296802 | ENSP00000389103 |
| ENSP00000296802 | ENSP00000393241 |
| ENSP00000296802 | ENSP00000394290 |
| ENSP00000296802 | ENSP00000402338 |
| ENSP00000296802 | ENSP00000403175 |
| ENSP00000296802 | ENSP00000403576 |
| ENSP00000296802 | ENSP00000409074 |
| ENSP00000296802 | ENSP00000409367 |
| ENSP00000296802 | ENSP00000411162 |
| ENSP00000296802 | ENSP00000412583 |
| ENSP00000296802 | ENSP00000414321 |
| ENSP00000296802 | ENSP00000416110 |
| ENSP00000296802 | ENSP00000417229 |
| ENSP00000296802 | ENSP00000420357 |
| ENSP00000296802 | ENSP00000420714 |
| ENSP00000296805 | ENSP00000297908 |
| ENSP00000296805 | ENSP00000298283 |
| ENSP00000296805 | ENSP00000300151 |
| ENSP00000296805 | ENSP00000302160 |
| ENSP00000296805 | ENSP00000302896 |
| ENSP00000296805 | ENSP00000306548 |
| ENSP00000296805 | ENSP00000307853 |
| ENSP00000296805 | ENSP00000308897 |
| ENSP00000296805 | ENSP00000310448 |

|                 |                 |
|-----------------|-----------------|
| ENSP00000296805 | ENSP00000310520 |
| ENSP00000296805 | ENSP00000311028 |
| ENSP00000296805 | ENSP00000311430 |
| ENSP00000296805 | ENSP00000312735 |
| ENSP00000296805 | ENSP00000315379 |
| ENSP00000296805 | ENSP00000317376 |
| ENSP00000296805 | ENSP00000318646 |
| ENSP00000296805 | ENSP00000318861 |
| ENSP00000296805 | ENSP00000321320 |
| ENSP00000296805 | ENSP00000321810 |
| ENSP00000296805 | ENSP00000325448 |
| ENSP00000296805 | ENSP00000326981 |
| ENSP00000296805 | ENSP00000333837 |
| ENSP00000296805 | ENSP00000335321 |
| ENSP00000296805 | ENSP00000336702 |
| ENSP00000296805 | ENSP00000339795 |
| ENSP00000296805 | ENSP00000341082 |
| ENSP00000296805 | ENSP00000341885 |
| ENSP00000296805 | ENSP00000343557 |
| ENSP00000296805 | ENSP00000346015 |
| ENSP00000296805 | ENSP00000346022 |
| ENSP00000296805 | ENSP00000346067 |
| ENSP00000296805 | ENSP00000351137 |
| ENSP00000296805 | ENSP00000354125 |
| ENSP00000296805 | ENSP00000354525 |
| ENSP00000296805 | ENSP00000354739 |
| ENSP00000296805 | ENSP00000356811 |
| ENSP00000296805 | ENSP00000357631 |
| ENSP00000296805 | ENSP00000358554 |
| ENSP00000296805 | ENSP00000359345 |
| ENSP00000296805 | ENSP00000359454 |
| ENSP00000296805 | ENSP00000362036 |
| ENSP00000296805 | ENSP00000362110 |
| ENSP00000296805 | ENSP00000363018 |
| ENSP00000296805 | ENSP00000363313 |
| ENSP00000296805 | ENSP00000363559 |
| ENSP00000296805 | ENSP00000363676 |
| ENSP00000296805 | ENSP00000364289 |
| ENSP00000296805 | ENSP00000364320 |
| ENSP00000296805 | ENSP00000366557 |
| ENSP00000296805 | ENSP00000373404 |
| ENSP00000296805 | ENSP00000375730 |
| ENSP00000296805 | ENSP00000376973 |
| ENSP00000296805 | ENSP00000377486 |
| ENSP00000296805 | ENSP00000377865 |
| ENSP00000296805 | ENSP00000379339 |

|                 |                 |
|-----------------|-----------------|
| ENSP00000296805 | ENSP00000379888 |
| ENSP00000296805 | ENSP00000382779 |
| ENSP00000296805 | ENSP00000386992 |
| ENSP00000296805 | ENSP00000387006 |
| ENSP00000296805 | ENSP00000388330 |
| ENSP00000296805 | ENSP00000389103 |
| ENSP00000296805 | ENSP00000393241 |
| ENSP00000296805 | ENSP00000393953 |
| ENSP00000296805 | ENSP00000401566 |
| ENSP00000296805 | ENSP00000403175 |
| ENSP00000296805 | ENSP00000412583 |
| ENSP00000296805 | ENSP00000416110 |
| ENSP00000296805 | ENSP00000417229 |
| ENSP00000296805 | ENSP00000419599 |
| ENSP00000296805 | ENSP00000420714 |
| ENSP00000296859 | ENSP00000345530 |
| ENSP00000296859 | ENSP00000394794 |
| ENSP00000296861 | ENSP00000341268 |
| ENSP00000296861 | ENSP00000354346 |
| ENSP00000296870 | ENSP00000303507 |
| ENSP00000296870 | ENSP00000384053 |
| ENSP00000296871 | ENSP00000307046 |
| ENSP00000296871 | ENSP00000370935 |
| ENSP00000296871 | ENSP00000384053 |
| ENSP00000296875 | ENSP00000297261 |
| ENSP00000296875 | ENSP00000331719 |
| ENSP00000296875 | ENSP00000347184 |
| ENSP00000296875 | ENSP00000361949 |
| ENSP00000296875 | ENSP00000363708 |
| ENSP00000296875 | ENSP00000404121 |
| ENSP00000296930 | ENSP00000299767 |
| ENSP00000296930 | ENSP00000300151 |
| ENSP00000296930 | ENSP00000301019 |
| ENSP00000296930 | ENSP00000301280 |
| ENSP00000296930 | ENSP00000302886 |
| ENSP00000296930 | ENSP00000305689 |
| ENSP00000296930 | ENSP00000308750 |
| ENSP00000296930 | ENSP00000309565 |
| ENSP00000296930 | ENSP00000310590 |
| ENSP00000296930 | ENSP00000315791 |
| ENSP00000296930 | ENSP00000316032 |
| ENSP00000296930 | ENSP00000318195 |
| ENSP00000296930 | ENSP00000319831 |
| ENSP00000296930 | ENSP00000325376 |
| ENSP00000296930 | ENSP00000329466 |
| ENSP00000296930 | ENSP00000329662 |

|                 |                 |
|-----------------|-----------------|
| ENSP00000296930 | ENSP00000331019 |
| ENSP00000296930 | ENSP00000332721 |
| ENSP00000296930 | ENSP00000334538 |
| ENSP00000296930 | ENSP00000336868 |
| ENSP00000296930 | ENSP00000337340 |
| ENSP00000296930 | ENSP00000339145 |
| ENSP00000296930 | ENSP00000339353 |
| ENSP00000296930 | ENSP00000341947 |
| ENSP00000296930 | ENSP00000344683 |
| ENSP00000296930 | ENSP00000345436 |
| ENSP00000296930 | ENSP00000345917 |
| ENSP00000296930 | ENSP00000346120 |
| ENSP00000296930 | ENSP00000350283 |
| ENSP00000296930 | ENSP00000351894 |
| ENSP00000296930 | ENSP00000352565 |
| ENSP00000296930 | ENSP00000354522 |
| ENSP00000296930 | ENSP00000354916 |
| ENSP00000296930 | ENSP00000355050 |
| ENSP00000296930 | ENSP00000355153 |
| ENSP00000296930 | ENSP00000355759 |
| ENSP00000296930 | ENSP00000355922 |
| ENSP00000296930 | ENSP00000360025 |
| ENSP00000296930 | ENSP00000360532 |
| ENSP00000296930 | ENSP00000364398 |
| ENSP00000296930 | ENSP00000365057 |
| ENSP00000296930 | ENSP00000367454 |
| ENSP00000296930 | ENSP00000367766 |
| ENSP00000296930 | ENSP00000368438 |
| ENSP00000296930 | ENSP00000370083 |
| ENSP00000296930 | ENSP00000370376 |
| ENSP00000296930 | ENSP00000370589 |
| ENSP00000296930 | ENSP00000370968 |
| ENSP00000296930 | ENSP00000373700 |
| ENSP00000296930 | ENSP00000373952 |
| ENSP00000296930 | ENSP00000377527 |
| ENSP00000296930 | ENSP00000379607 |
| ENSP00000296930 | ENSP00000381657 |
| ENSP00000296930 | ENSP00000382392 |
| ENSP00000296930 | ENSP00000382999 |
| ENSP00000296930 | ENSP00000384026 |
| ENSP00000296930 | ENSP00000390746 |
| ENSP00000296930 | ENSP00000401272 |
| ENSP00000296930 | ENSP00000406895 |
| ENSP00000296930 | ENSP00000412884 |
| ENSP00000296930 | ENSP00000414109 |
| ENSP00000296930 | ENSP00000417281 |

|                 |                 |
|-----------------|-----------------|
| ENSP00000296953 | ENSP00000304903 |
| ENSP00000296953 | ENSP00000342136 |
| ENSP00000296955 | ENSP00000334061 |
| ENSP00000297135 | ENSP00000305442 |
| ENSP00000297135 | ENSP00000326514 |
| ENSP00000297151 | ENSP00000298532 |
| ENSP00000297151 | ENSP00000300413 |
| ENSP00000297151 | ENSP00000301740 |
| ENSP00000297151 | ENSP00000304350 |
| ENSP00000297151 | ENSP00000304370 |
| ENSP00000297151 | ENSP00000307004 |
| ENSP00000297151 | ENSP00000307863 |
| ENSP00000297151 | ENSP00000314311 |
| ENSP00000297151 | ENSP00000315379 |
| ENSP00000297151 | ENSP00000318861 |
| ENSP00000297151 | ENSP00000324274 |
| ENSP00000297151 | ENSP00000326806 |
| ENSP00000297151 | ENSP00000331907 |
| ENSP00000297151 | ENSP00000334148 |
| ENSP00000297151 | ENSP00000339090 |
| ENSP00000297151 | ENSP00000343557 |
| ENSP00000297151 | ENSP00000359727 |
| ENSP00000297151 | ENSP00000360532 |
| ENSP00000297151 | ENSP00000366557 |
| ENSP00000297151 | ENSP00000367835 |
| ENSP00000297151 | ENSP00000376973 |
| ENSP00000297151 | ENSP00000386759 |
| ENSP00000297151 | ENSP00000416959 |
| ENSP00000297151 | ENSP00000420195 |
| ENSP00000297157 | ENSP00000339723 |
| ENSP00000297185 | ENSP00000298097 |
| ENSP00000297185 | ENSP00000299767 |
| ENSP00000297185 | ENSP00000301012 |
| ENSP00000297185 | ENSP00000301585 |
| ENSP00000297185 | ENSP00000302896 |
| ENSP00000297185 | ENSP00000304704 |
| ENSP00000297185 | ENSP00000309365 |
| ENSP00000297185 | ENSP00000309474 |
| ENSP00000297185 | ENSP00000310623 |
| ENSP00000297185 | ENSP00000311505 |
| ENSP00000297185 | ENSP00000318115 |
| ENSP00000297185 | ENSP00000325562 |
| ENSP00000297185 | ENSP00000327070 |
| ENSP00000297185 | ENSP00000329002 |
| ENSP00000297185 | ENSP00000329466 |
| ENSP00000297185 | ENSP00000329558 |

|                 |                 |
|-----------------|-----------------|
| ENSP00000297185 | ENSP00000329967 |
| ENSP00000297185 | ENSP00000330836 |
| ENSP00000297185 | ENSP00000331817 |
| ENSP00000297185 | ENSP00000337340 |
| ENSP00000297185 | ENSP00000338788 |
| ENSP00000297185 | ENSP00000338862 |
| ENSP00000297185 | ENSP00000339933 |
| ENSP00000297185 | ENSP00000340019 |
| ENSP00000297185 | ENSP00000341243 |
| ENSP00000297185 | ENSP00000341743 |
| ENSP00000297185 | ENSP00000344460 |
| ENSP00000297185 | ENSP00000345282 |
| ENSP00000297185 | ENSP00000347314 |
| ENSP00000297185 | ENSP00000348877 |
| ENSP00000297185 | ENSP00000350928 |
| ENSP00000297185 | ENSP00000354927 |
| ENSP00000297185 | ENSP00000355153 |
| ENSP00000297185 | ENSP00000355865 |
| ENSP00000297185 | ENSP00000357748 |
| ENSP00000297185 | ENSP00000357998 |
| ENSP00000297185 | ENSP00000358022 |
| ENSP00000297185 | ENSP00000358140 |
| ENSP00000297185 | ENSP00000358497 |
| ENSP00000297185 | ENSP00000360286 |
| ENSP00000297185 | ENSP00000360803 |
| ENSP00000297185 | ENSP00000361465 |
| ENSP00000297185 | ENSP00000361686 |
| ENSP00000297185 | ENSP00000362298 |
| ENSP00000297185 | ENSP00000362424 |
| ENSP00000297185 | ENSP00000363559 |
| ENSP00000297185 | ENSP00000365007 |
| ENSP00000297185 | ENSP00000365388 |
| ENSP00000297185 | ENSP00000365766 |
| ENSP00000297185 | ENSP00000366482 |
| ENSP00000297185 | ENSP00000367208 |
| ENSP00000297185 | ENSP00000370377 |
| ENSP00000297185 | ENSP00000379607 |
| ENSP00000297185 | ENSP00000380504 |
| ENSP00000297185 | ENSP00000381891 |
| ENSP00000297185 | ENSP00000382423 |
| ENSP00000297185 | ENSP00000382595 |
| ENSP00000297185 | ENSP00000386621 |
| ENSP00000297185 | ENSP00000386717 |
| ENSP00000297185 | ENSP00000387219 |
| ENSP00000297185 | ENSP00000387262 |
| ENSP00000297185 | ENSP00000388872 |

|                 |                 |
|-----------------|-----------------|
| ENSP00000297185 | ENSP00000403817 |
| ENSP00000297185 | ENSP00000417132 |
| ENSP00000297195 | ENSP00000391798 |
| ENSP00000297261 | ENSP00000298743 |
| ENSP00000297261 | ENSP00000301831 |
| ENSP00000297261 | ENSP00000302216 |
| ENSP00000297261 | ENSP00000314311 |
| ENSP00000297261 | ENSP00000316842 |
| ENSP00000297261 | ENSP00000319501 |
| ENSP00000297261 | ENSP00000332353 |
| ENSP00000297261 | ENSP00000349208 |
| ENSP00000297261 | ENSP00000353622 |
| ENSP00000297261 | ENSP00000353904 |
| ENSP00000297261 | ENSP00000354586 |
| ENSP00000297261 | ENSP00000354995 |
| ENSP00000297261 | ENSP00000355896 |
| ENSP00000297261 | ENSP00000356795 |
| ENSP00000297261 | ENSP00000358918 |
| ENSP00000297261 | ENSP00000359854 |
| ENSP00000297261 | ENSP00000363489 |
| ENSP00000297261 | ENSP00000364524 |
| ENSP00000297261 | ENSP00000364839 |
| ENSP00000297261 | ENSP00000366395 |
| ENSP00000297261 | ENSP00000377401 |
| ENSP00000297261 | ENSP00000397435 |
| ENSP00000297261 | ENSP00000409950 |
| ENSP00000297265 | ENSP00000302239 |
| ENSP00000297265 | ENSP00000307387 |
| ENSP00000297265 | ENSP00000310440 |
| ENSP00000297265 | ENSP00000311200 |
| ENSP00000297265 | ENSP00000313601 |
| ENSP00000297265 | ENSP00000317468 |
| ENSP00000297265 | ENSP00000330408 |
| ENSP00000297265 | ENSP00000336702 |
| ENSP00000297265 | ENSP00000345216 |
| ENSP00000297265 | ENSP00000354519 |
| ENSP00000297265 | ENSP00000356602 |
| ENSP00000297265 | ENSP00000365943 |
| ENSP00000297265 | ENSP00000378368 |
| ENSP00000297265 | ENSP00000380349 |
| ENSP00000297265 | ENSP00000381036 |
| ENSP00000297265 | ENSP00000391249 |
| ENSP00000297273 | ENSP00000298229 |
| ENSP00000297273 | ENSP00000300574 |
| ENSP00000297273 | ENSP00000324422 |
| ENSP00000297273 | ENSP00000371341 |



|                 |                 |
|-----------------|-----------------|
| ENSP00000297290 | ENSP00000343785 |
| ENSP00000297290 | ENSP00000354995 |
| ENSP00000297290 | ENSP00000359634 |
| ENSP00000297313 | ENSP00000300574 |
| ENSP00000297313 | ENSP00000309433 |
| ENSP00000297313 | ENSP00000330836 |
| ENSP00000297313 | ENSP00000357452 |
| ENSP00000297313 | ENSP00000358146 |
| ENSP00000297313 | ENSP00000363807 |
| ENSP00000297313 | ENSP00000381293 |
| ENSP00000297313 | ENSP00000391735 |
| ENSP00000297316 | ENSP00000307272 |
| ENSP00000297316 | ENSP00000311005 |
| ENSP00000297316 | ENSP00000344456 |
| ENSP00000297316 | ENSP00000352516 |
| ENSP00000297316 | ENSP00000362068 |
| ENSP00000297316 | ENSP00000362936 |
| ENSP00000297316 | ENSP00000367406 |
| ENSP00000297316 | ENSP00000404658 |
| ENSP00000297325 | ENSP00000308268 |
| ENSP00000297325 | ENSP00000322396 |
| ENSP00000297325 | ENSP00000343657 |
| ENSP00000297325 | ENSP00000354497 |
| ENSP00000297325 | ENSP00000356272 |
| ENSP00000297325 | ENSP00000367079 |
| ENSP00000297325 | ENSP00000371475 |
| ENSP00000297338 | ENSP00000298767 |
| ENSP00000297338 | ENSP00000302530 |
| ENSP00000297338 | ENSP00000306682 |
| ENSP00000297338 | ENSP00000306999 |
| ENSP00000297338 | ENSP00000307786 |
| ENSP00000297338 | ENSP00000308944 |
| ENSP00000297338 | ENSP00000312778 |
| ENSP00000297338 | ENSP00000313171 |
| ENSP00000297338 | ENSP00000313420 |
| ENSP00000297338 | ENSP00000313851 |
| ENSP00000297338 | ENSP00000314499 |
| ENSP00000297338 | ENSP00000314508 |
| ENSP00000297338 | ENSP00000316879 |
| ENSP00000297338 | ENSP00000317985 |
| ENSP00000297338 | ENSP00000318775 |
| ENSP00000297338 | ENSP00000321636 |
| ENSP00000297338 | ENSP00000322180 |
| ENSP00000297338 | ENSP00000322570 |
| ENSP00000297338 | ENSP00000325017 |
| ENSP00000297338 | ENSP00000326261 |

|                 |                 |
|-----------------|-----------------|
| ENSP00000297338 | ENSP00000329466 |
| ENSP00000297338 | ENSP00000329558 |
| ENSP00000297338 | ENSP00000335357 |
| ENSP00000297338 | ENSP00000336606 |
| ENSP00000297338 | ENSP00000337194 |
| ENSP00000297338 | ENSP00000341382 |
| ENSP00000297338 | ENSP00000342381 |
| ENSP00000297338 | ENSP00000343081 |
| ENSP00000297338 | ENSP00000343741 |
| ENSP00000297338 | ENSP00000347168 |
| ENSP00000297338 | ENSP00000347733 |
| ENSP00000297338 | ENSP00000348551 |
| ENSP00000297338 | ENSP00000348554 |
| ENSP00000297338 | ENSP00000348722 |
| ENSP00000297338 | ENSP00000349213 |
| ENSP00000297338 | ENSP00000349748 |
| ENSP00000297338 | ENSP00000350767 |
| ENSP00000297338 | ENSP00000351284 |
| ENSP00000297338 | ENSP00000351697 |
| ENSP00000297338 | ENSP00000353332 |
| ENSP00000297338 | ENSP00000353793 |
| ENSP00000297338 | ENSP00000353904 |
| ENSP00000297338 | ENSP00000354720 |
| ENSP00000297338 | ENSP00000354916 |
| ENSP00000297338 | ENSP00000355388 |
| ENSP00000297338 | ENSP00000355596 |
| ENSP00000297338 | ENSP00000355731 |
| ENSP00000297338 | ENSP00000356448 |
| ENSP00000297338 | ENSP00000356520 |
| ENSP00000297338 | ENSP00000358140 |
| ENSP00000297338 | ENSP00000358423 |
| ENSP00000297338 | ENSP00000358478 |
| ENSP00000297338 | ENSP00000358497 |
| ENSP00000297338 | ENSP00000361310 |
| ENSP00000297338 | ENSP00000361875 |
| ENSP00000297338 | ENSP00000361990 |
| ENSP00000297338 | ENSP00000362352 |
| ENSP00000297338 | ENSP00000362413 |
| ENSP00000297338 | ENSP00000363763 |
| ENSP00000297338 | ENSP00000365113 |
| ENSP00000297338 | ENSP00000365877 |
| ENSP00000297338 | ENSP00000366974 |
| ENSP00000297338 | ENSP00000367034 |
| ENSP00000297338 | ENSP00000368017 |
| ENSP00000297338 | ENSP00000368349 |
| ENSP00000297338 | ENSP00000368438 |

|                 |                 |
|-----------------|-----------------|
| ENSP00000297338 | ENSP00000368976 |
| ENSP00000297338 | ENSP00000369411 |
| ENSP00000297338 | ENSP00000369716 |
| ENSP00000297338 | ENSP00000372689 |
| ENSP00000297338 | ENSP00000375809 |
| ENSP00000297338 | ENSP00000376309 |
| ENSP00000297338 | ENSP00000378180 |
| ENSP00000297338 | ENSP00000378529 |
| ENSP00000297338 | ENSP00000380414 |
| ENSP00000297338 | ENSP00000396068 |
| ENSP00000297338 | ENSP00000402515 |
| ENSP00000297347 | ENSP00000300651 |
| ENSP00000297347 | ENSP00000314311 |
| ENSP00000297347 | ENSP00000314949 |
| ENSP00000297347 | ENSP00000323720 |
| ENSP00000297347 | ENSP00000325612 |
| ENSP00000297347 | ENSP00000326128 |
| ENSP00000297347 | ENSP00000326767 |
| ENSP00000297347 | ENSP00000337340 |
| ENSP00000297347 | ENSP00000342343 |
| ENSP00000297347 | ENSP00000348610 |
| ENSP00000297347 | ENSP00000357047 |
| ENSP00000297347 | ENSP00000357448 |
| ENSP00000297347 | ENSP00000357907 |
| ENSP00000297347 | ENSP00000360371 |
| ENSP00000297347 | ENSP00000362948 |
| ENSP00000297347 | ENSP00000363193 |
| ENSP00000297347 | ENSP00000365588 |
| ENSP00000297347 | ENSP00000373060 |
| ENSP00000297347 | ENSP00000381216 |
| ENSP00000297347 | ENSP00000384048 |
| ENSP00000297347 | ENSP00000387429 |
| ENSP00000297347 | ENSP00000391774 |
| ENSP00000297347 | ENSP00000392617 |
| ENSP00000297347 | ENSP00000396484 |
| ENSP00000297347 | ENSP00000403852 |
| ENSP00000297347 | ENSP00000404318 |
| ENSP00000297347 | ENSP00000409167 |
| ENSP00000297347 | ENSP00000415212 |
| ENSP00000297347 | ENSP00000416511 |
| ENSP00000297347 | ENSP00000418734 |
| ENSP00000297350 | ENSP00000346839 |
| ENSP00000297431 | ENSP00000300738 |
| ENSP00000297431 | ENSP00000311768 |
| ENSP00000297431 | ENSP00000312946 |
| ENSP00000297431 | ENSP00000313171 |

|                 |                 |
|-----------------|-----------------|
| ENSP00000297431 | ENSP00000319651 |
| ENSP00000297431 | ENSP00000322180 |
| ENSP00000297431 | ENSP00000323439 |
| ENSP00000297431 | ENSP00000335357 |
| ENSP00000297431 | ENSP00000336868 |
| ENSP00000297431 | ENSP00000341382 |
| ENSP00000297431 | ENSP00000344741 |
| ENSP00000297431 | ENSP00000351947 |
| ENSP00000297431 | ENSP00000353793 |
| ENSP00000297431 | ENSP00000354720 |
| ENSP00000297431 | ENSP00000354916 |
| ENSP00000297431 | ENSP00000354957 |
| ENSP00000297431 | ENSP00000360412 |
| ENSP00000297431 | ENSP00000360532 |
| ENSP00000297431 | ENSP00000360621 |
| ENSP00000297431 | ENSP00000362532 |
| ENSP00000297431 | ENSP00000362592 |
| ENSP00000297431 | ENSP00000363021 |
| ENSP00000297431 | ENSP00000366953 |
| ENSP00000297431 | ENSP00000370741 |
| ENSP00000297431 | ENSP00000371475 |
| ENSP00000297431 | ENSP00000379612 |
| ENSP00000297431 | ENSP00000387982 |
| ENSP00000297439 | ENSP00000334002 |
| ENSP00000297440 | ENSP00000323511 |
| ENSP00000297508 | ENSP00000315644 |
| ENSP00000297532 | ENSP00000300574 |
| ENSP00000297532 | ENSP00000401371 |
| ENSP00000297540 | ENSP00000302176 |
| ENSP00000297540 | ENSP00000361014 |
| ENSP00000297540 | ENSP00000363055 |
| ENSP00000297540 | ENSP00000370557 |
| ENSP00000297540 | ENSP00000379607 |
| ENSP00000297562 | ENSP00000313829 |
| ENSP00000297562 | ENSP00000354951 |
| ENSP00000297562 | ENSP00000366607 |
| ENSP00000297562 | ENSP00000377218 |
| ENSP00000297562 | ENSP00000378350 |
| ENSP00000297564 | ENSP00000307786 |
| ENSP00000297564 | ENSP00000309565 |
| ENSP00000297564 | ENSP00000317159 |
| ENSP00000297564 | ENSP00000317780 |
| ENSP00000297564 | ENSP00000321239 |
| ENSP00000297564 | ENSP00000332887 |
| ENSP00000297564 | ENSP00000342300 |
| ENSP00000297564 | ENSP00000354499 |

|                 |                 |
|-----------------|-----------------|
| ENSP00000297564 | ENSP00000354554 |
| ENSP00000297564 | ENSP00000354876 |
| ENSP00000297564 | ENSP00000354982 |
| ENSP00000297564 | ENSP00000355572 |
| ENSP00000297564 | ENSP00000360782 |
| ENSP00000297564 | ENSP00000367934 |
| ENSP00000297579 | ENSP00000301764 |
| ENSP00000297579 | ENSP00000302111 |
| ENSP00000297579 | ENSP00000308179 |
| ENSP00000297579 | ENSP00000308332 |
| ENSP00000297579 | ENSP00000311028 |
| ENSP00000297579 | ENSP00000314193 |
| ENSP00000297579 | ENSP00000315674 |
| ENSP00000297579 | ENSP00000326981 |
| ENSP00000297579 | ENSP00000327179 |
| ENSP00000297579 | ENSP00000328854 |
| ENSP00000297579 | ENSP00000329466 |
| ENSP00000297579 | ENSP00000339145 |
| ENSP00000297579 | ENSP00000346453 |
| ENSP00000297579 | ENSP00000347495 |
| ENSP00000297579 | ENSP00000353246 |
| ENSP00000297579 | ENSP00000354040 |
| ENSP00000297579 | ENSP00000355541 |
| ENSP00000297579 | ENSP00000363642 |
| ENSP00000297579 | ENSP00000363746 |
| ENSP00000297579 | ENSP00000370258 |
| ENSP00000297579 | ENSP00000370589 |
| ENSP00000297579 | ENSP00000371101 |
| ENSP00000297579 | ENSP00000372695 |
| ENSP00000297579 | ENSP00000377944 |
| ENSP00000297579 | ENSP00000379888 |
| ENSP00000297579 | ENSP00000384302 |
| ENSP00000297579 | ENSP00000387006 |
| ENSP00000297579 | ENSP00000399454 |
| ENSP00000297579 | ENSP00000402869 |
| ENSP00000297579 | ENSP00000405614 |
| ENSP00000297581 | ENSP00000342136 |
| ENSP00000297591 | ENSP00000311827 |
| ENSP00000297591 | ENSP00000329466 |
| ENSP00000297591 | ENSP00000336868 |
| ENSP00000297591 | ENSP00000351141 |
| ENSP00000297591 | ENSP00000356520 |
| ENSP00000297591 | ENSP00000361557 |
| ENSP00000297591 | ENSP00000379607 |
| ENSP00000297591 | ENSP00000391432 |
| ENSP00000297591 | ENSP00000392601 |

|                 |                 |
|-----------------|-----------------|
| ENSP00000297591 | ENSP00000401277 |
| ENSP00000297598 | ENSP00000327070 |
| ENSP00000297598 | ENSP00000337127 |
| ENSP00000297598 | ENSP00000351885 |
| ENSP00000297598 | ENSP00000360268 |
| ENSP00000297598 | ENSP00000369100 |
| ENSP00000297598 | ENSP00000371236 |
| ENSP00000297598 | ENSP00000376268 |
| ENSP00000297598 | ENSP00000394382 |
| ENSP00000297623 | ENSP00000369816 |
| ENSP00000297625 | ENSP00000300658 |
| ENSP00000297625 | ENSP00000326699 |
| ENSP00000297625 | ENSP00000337688 |
| ENSP00000297625 | ENSP00000349970 |
| ENSP00000297625 | ENSP00000357998 |
| ENSP00000297625 | ENSP00000379042 |
| ENSP00000297661 | ENSP00000301765 |
| ENSP00000297661 | ENSP00000318629 |
| ENSP00000297661 | ENSP00000366565 |
| ENSP00000297689 | ENSP00000326272 |
| ENSP00000297689 | ENSP00000335493 |
| ENSP00000297689 | ENSP00000342136 |
| ENSP00000297689 | ENSP00000342307 |
| ENSP00000297689 | ENSP00000347294 |
| ENSP00000297689 | ENSP00000359206 |
| ENSP00000297689 | ENSP00000359290 |
| ENSP00000297689 | ENSP00000359531 |
| ENSP00000297689 | ENSP00000365025 |
| ENSP00000297788 | ENSP00000309606 |
| ENSP00000297788 | ENSP00000355596 |
| ENSP00000297788 | ENSP00000359552 |
| ENSP00000297788 | ENSP00000360532 |
| ENSP00000297792 | ENSP00000359321 |
| ENSP00000297792 | ENSP00000366156 |
| ENSP00000297792 | ENSP00000384048 |
| ENSP00000297792 | ENSP00000385746 |
| ENSP00000297792 | ENSP00000386759 |
| ENSP00000297792 | ENSP00000417132 |
| ENSP00000297814 | ENSP00000346566 |
| ENSP00000297837 | ENSP00000299601 |
| ENSP00000297837 | ENSP00000414187 |
| ENSP00000297873 | ENSP00000309433 |
| ENSP00000297873 | ENSP00000311135 |
| ENSP00000297873 | ENSP00000312870 |
| ENSP00000297873 | ENSP00000332171 |
| ENSP00000297873 | ENSP00000333920 |

|                 |                 |
|-----------------|-----------------|
| ENSP00000297908 | ENSP00000298283 |
| ENSP00000297908 | ENSP00000300151 |
| ENSP00000297908 | ENSP00000301585 |
| ENSP00000297908 | ENSP00000302896 |
| ENSP00000297908 | ENSP00000306548 |
| ENSP00000297908 | ENSP00000308897 |
| ENSP00000297908 | ENSP00000311028 |
| ENSP00000297908 | ENSP00000311430 |
| ENSP00000297908 | ENSP00000317376 |
| ENSP00000297908 | ENSP00000318646 |
| ENSP00000297908 | ENSP00000326981 |
| ENSP00000297908 | ENSP00000337396 |
| ENSP00000297908 | ENSP00000339795 |
| ENSP00000297908 | ENSP00000341082 |
| ENSP00000297908 | ENSP00000341885 |
| ENSP00000297908 | ENSP00000346015 |
| ENSP00000297908 | ENSP00000346022 |
| ENSP00000297908 | ENSP00000346067 |
| ENSP00000297908 | ENSP00000346725 |
| ENSP00000297908 | ENSP00000354525 |
| ENSP00000297908 | ENSP00000354739 |
| ENSP00000297908 | ENSP00000359345 |
| ENSP00000297908 | ENSP00000362036 |
| ENSP00000297908 | ENSP00000363018 |
| ENSP00000297908 | ENSP00000363676 |
| ENSP00000297908 | ENSP00000373404 |
| ENSP00000297908 | ENSP00000375730 |
| ENSP00000297908 | ENSP00000377486 |
| ENSP00000297908 | ENSP00000377865 |
| ENSP00000297908 | ENSP00000379339 |
| ENSP00000297908 | ENSP00000389103 |
| ENSP00000297908 | ENSP00000393241 |
| ENSP00000297908 | ENSP00000403175 |
| ENSP00000297908 | ENSP00000412583 |
| ENSP00000297908 | ENSP00000416110 |
| ENSP00000297908 | ENSP00000420714 |
| ENSP00000297954 | ENSP00000313059 |
| ENSP00000297977 | ENSP00000338157 |
| ENSP00000297977 | ENSP00000358918 |
| ENSP00000297977 | ENSP00000367029 |
| ENSP00000297979 | ENSP00000370517 |
| ENSP00000297990 | ENSP00000298746 |
| ENSP00000297990 | ENSP00000301364 |
| ENSP00000297990 | ENSP00000301962 |
| ENSP00000297990 | ENSP00000302896 |
| ENSP00000297990 | ENSP00000305702 |

|                 |                 |
|-----------------|-----------------|
| ENSP00000297990 | ENSP00000308179 |
| ENSP00000297990 | ENSP00000308332 |
| ENSP00000297990 | ENSP00000310590 |
| ENSP00000297990 | ENSP00000311135 |
| ENSP00000297990 | ENSP00000314193 |
| ENSP00000297990 | ENSP00000314348 |
| ENSP00000297990 | ENSP00000315674 |
| ENSP00000297990 | ENSP00000317992 |
| ENSP00000297990 | ENSP00000318195 |
| ENSP00000297990 | ENSP00000318604 |
| ENSP00000297990 | ENSP00000321449 |
| ENSP00000297990 | ENSP00000321711 |
| ENSP00000297990 | ENSP00000322396 |
| ENSP00000297990 | ENSP00000324122 |
| ENSP00000297990 | ENSP00000326981 |
| ENSP00000297990 | ENSP00000327179 |
| ENSP00000297990 | ENSP00000327436 |
| ENSP00000297990 | ENSP00000328720 |
| ENSP00000297990 | ENSP00000328854 |
| ENSP00000297990 | ENSP00000329466 |
| ENSP00000297990 | ENSP00000331907 |
| ENSP00000297990 | ENSP00000338862 |
| ENSP00000297990 | ENSP00000339095 |
| ENSP00000297990 | ENSP00000343190 |
| ENSP00000297990 | ENSP00000343557 |
| ENSP00000297990 | ENSP00000344393 |
| ENSP00000297990 | ENSP00000346050 |
| ENSP00000297990 | ENSP00000355471 |
| ENSP00000297990 | ENSP00000355541 |
| ENSP00000297990 | ENSP00000356134 |
| ENSP00000297990 | ENSP00000356520 |
| ENSP00000297990 | ENSP00000358563 |
| ENSP00000297990 | ENSP00000358812 |
| ENSP00000297990 | ENSP00000359688 |
| ENSP00000297990 | ENSP00000360031 |
| ENSP00000297990 | ENSP00000361642 |
| ENSP00000297990 | ENSP00000361982 |
| ENSP00000297990 | ENSP00000362744 |
| ENSP00000297990 | ENSP00000363308 |
| ENSP00000297990 | ENSP00000363642 |
| ENSP00000297990 | ENSP00000363746 |
| ENSP00000297990 | ENSP00000365025 |
| ENSP00000297990 | ENSP00000365837 |
| ENSP00000297990 | ENSP00000366519 |
| ENSP00000297990 | ENSP00000366557 |
| ENSP00000297990 | ENSP00000368887 |



|                 |                 |
|-----------------|-----------------|
| ENSP00000297990 | ENSP00000368984 |
| ENSP00000297990 | ENSP00000370589 |
| ENSP00000297990 | ENSP00000371101 |
| ENSP00000297990 | ENSP00000371201 |
| ENSP00000297990 | ENSP00000372695 |
| ENSP00000297990 | ENSP00000378529 |
| ENSP00000297990 | ENSP00000379093 |
| ENSP00000297990 | ENSP00000379888 |
| ENSP00000297990 | ENSP00000382392 |
| ENSP00000297990 | ENSP00000384302 |
| ENSP00000297990 | ENSP00000386759 |
| ENSP00000297990 | ENSP00000387303 |
| ENSP00000297990 | ENSP00000388464 |
| ENSP00000297990 | ENSP00000392601 |
| ENSP00000297990 | ENSP00000399454 |
| ENSP00000297990 | ENSP00000402869 |
| ENSP00000297990 | ENSP00000405614 |
| ENSP00000297990 | ENSP00000410396 |
| ENSP00000297990 | ENSP00000417763 |
| ENSP00000297990 | ENSP00000419740 |
| ENSP00000297994 | ENSP00000314441 |
| ENSP00000297994 | ENSP00000327821 |
| ENSP00000297994 | ENSP00000328671 |
| ENSP00000297994 | ENSP00000356476 |
| ENSP00000297994 | ENSP00000364320 |
| ENSP00000297994 | ENSP00000365837 |
| ENSP00000298048 | ENSP00000307272 |
| ENSP00000298048 | ENSP00000309132 |
| ENSP00000298048 | ENSP00000310042 |
| ENSP00000298048 | ENSP00000311677 |
| ENSP00000298048 | ENSP00000330074 |
| ENSP00000298048 | ENSP00000335321 |
| ENSP00000298048 | ENSP00000340879 |
| ENSP00000298048 | ENSP00000348273 |
| ENSP00000298048 | ENSP00000352408 |
| ENSP00000298048 | ENSP00000360532 |
| ENSP00000298048 | ENSP00000377793 |
| ENSP00000298048 | ENSP00000402084 |
| ENSP00000298048 | ENSP00000402338 |
| ENSP00000298139 | ENSP00000301280 |
| ENSP00000298139 | ENSP00000306561 |
| ENSP00000298139 | ENSP00000307491 |
| ENSP00000298139 | ENSP00000307853 |
| ENSP00000298139 | ENSP00000308944 |
| ENSP00000298139 | ENSP00000309572 |
| ENSP00000298139 | ENSP00000313350 |

|                 |                 |
|-----------------|-----------------|
| ENSP00000298139 | ENSP00000313420 |
| ENSP00000298139 | ENSP00000322242 |
| ENSP00000298139 | ENSP00000323439 |
| ENSP00000298139 | ENSP00000327197 |
| ENSP00000298139 | ENSP00000328940 |
| ENSP00000298139 | ENSP00000332171 |
| ENSP00000298139 | ENSP00000334474 |
| ENSP00000298139 | ENSP00000336606 |
| ENSP00000298139 | ENSP00000337353 |
| ENSP00000298139 | ENSP00000340305 |
| ENSP00000298139 | ENSP00000340879 |
| ENSP00000298139 | ENSP00000343392 |
| ENSP00000298139 | ENSP00000343741 |
| ENSP00000298139 | ENSP00000344741 |
| ENSP00000298139 | ENSP00000346566 |
| ENSP00000298139 | ENSP00000347232 |
| ENSP00000298139 | ENSP00000347978 |
| ENSP00000298139 | ENSP00000348020 |
| ENSP00000298139 | ENSP00000349393 |
| ENSP00000298139 | ENSP00000350249 |
| ENSP00000298139 | ENSP00000351284 |
| ENSP00000298139 | ENSP00000351885 |
| ENSP00000298139 | ENSP00000352257 |
| ENSP00000298139 | ENSP00000353793 |
| ENSP00000298139 | ENSP00000354522 |
| ENSP00000298139 | ENSP00000355153 |
| ENSP00000298139 | ENSP00000355759 |
| ENSP00000298139 | ENSP00000356520 |
| ENSP00000298139 | ENSP00000358019 |
| ENSP00000298139 | ENSP00000359454 |
| ENSP00000298139 | ENSP00000360310 |
| ENSP00000298139 | ENSP00000360532 |
| ENSP00000298139 | ENSP00000361465 |
| ENSP00000298139 | ENSP00000362441 |
| ENSP00000298139 | ENSP00000363021 |
| ENSP00000298139 | ENSP00000367029 |
| ENSP00000298139 | ENSP00000367787 |
| ENSP00000298139 | ENSP00000368438 |
| ENSP00000298139 | ENSP00000368646 |
| ENSP00000298139 | ENSP00000369335 |
| ENSP00000298139 | ENSP00000369411 |
| ENSP00000298139 | ENSP00000370150 |
| ENSP00000298139 | ENSP00000370151 |
| ENSP00000298139 | ENSP00000372023 |
| ENSP00000298139 | ENSP00000373060 |
| ENSP00000298139 | ENSP00000375809 |

|                 |                 |
|-----------------|-----------------|
| ENSP00000298139 | ENSP00000377655 |
| ENSP00000298139 | ENSP00000386259 |
| ENSP00000298139 | ENSP00000389709 |
| ENSP00000298139 | ENSP00000394649 |
| ENSP00000298139 | ENSP00000394791 |
| ENSP00000298139 | ENSP00000396704 |
| ENSP00000298139 | ENSP00000397830 |
| ENSP00000298139 | ENSP00000402527 |
| ENSP00000298139 | ENSP00000406868 |
| ENSP00000298139 | ENSP00000407047 |
| ENSP00000298198 | ENSP00000340879 |
| ENSP00000298198 | ENSP00000370150 |
| ENSP00000298229 | ENSP00000300574 |
| ENSP00000298229 | ENSP00000311344 |
| ENSP00000298229 | ENSP00000319170 |
| ENSP00000298229 | ENSP00000327145 |
| ENSP00000298229 | ENSP00000331201 |
| ENSP00000298229 | ENSP00000343657 |
| ENSP00000298229 | ENSP00000351926 |
| ENSP00000298229 | ENSP00000355136 |
| ENSP00000298229 | ENSP00000360916 |
| ENSP00000298229 | ENSP00000363985 |
| ENSP00000298229 | ENSP00000370719 |
| ENSP00000298229 | ENSP00000377148 |
| ENSP00000298229 | ENSP00000380921 |
| ENSP00000298229 | ENSP00000413520 |
| ENSP00000298281 | ENSP00000301788 |
| ENSP00000298281 | ENSP00000304704 |
| ENSP00000298281 | ENSP00000312735 |
| ENSP00000298281 | ENSP00000314949 |
| ENSP00000298281 | ENSP00000315791 |
| ENSP00000298281 | ENSP00000317872 |
| ENSP00000298281 | ENSP00000325377 |
| ENSP00000298281 | ENSP00000326261 |
| ENSP00000298281 | ENSP00000329029 |
| ENSP00000298281 | ENSP00000331817 |
| ENSP00000298281 | ENSP00000332444 |
| ENSP00000298281 | ENSP00000336752 |
| ENSP00000298281 | ENSP00000339245 |
| ENSP00000298281 | ENSP00000339353 |
| ENSP00000298281 | ENSP00000345096 |
| ENSP00000298281 | ENSP00000348010 |
| ENSP00000298281 | ENSP00000355185 |
| ENSP00000298281 | ENSP00000356146 |
| ENSP00000298281 | ENSP00000358576 |
| ENSP00000298281 | ENSP00000359531 |

|                 |                 |
|-----------------|-----------------|
| ENSP00000298281 | ENSP00000367527 |
| ENSP00000298281 | ENSP00000368017 |
| ENSP00000298281 | ENSP00000392859 |
| ENSP00000298281 | ENSP00000398208 |
| ENSP00000298283 | ENSP00000302896 |
| ENSP00000298283 | ENSP00000306548 |
| ENSP00000298283 | ENSP00000307525 |
| ENSP00000298283 | ENSP00000307889 |
| ENSP00000298283 | ENSP00000309334 |
| ENSP00000298283 | ENSP00000309565 |
| ENSP00000298283 | ENSP00000309830 |
| ENSP00000298283 | ENSP00000311028 |
| ENSP00000298283 | ENSP00000311430 |
| ENSP00000298283 | ENSP00000312311 |
| ENSP00000298283 | ENSP00000317376 |
| ENSP00000298283 | ENSP00000318646 |
| ENSP00000298283 | ENSP00000322419 |
| ENSP00000298283 | ENSP00000326981 |
| ENSP00000298283 | ENSP00000339095 |
| ENSP00000298283 | ENSP00000339795 |
| ENSP00000298283 | ENSP00000339844 |
| ENSP00000298283 | ENSP00000339845 |
| ENSP00000298283 | ENSP00000341082 |
| ENSP00000298283 | ENSP00000343745 |
| ENSP00000298283 | ENSP00000345156 |
| ENSP00000298283 | ENSP00000346015 |
| ENSP00000298283 | ENSP00000346022 |
| ENSP00000298283 | ENSP00000346027 |
| ENSP00000298283 | ENSP00000346037 |
| ENSP00000298283 | ENSP00000346050 |
| ENSP00000298283 | ENSP00000346088 |
| ENSP00000298283 | ENSP00000346725 |
| ENSP00000298283 | ENSP00000349142 |
| ENSP00000298283 | ENSP00000354739 |
| ENSP00000298283 | ENSP00000356290 |
| ENSP00000298283 | ENSP00000359345 |
| ENSP00000298283 | ENSP00000361076 |
| ENSP00000298283 | ENSP00000361287 |
| ENSP00000298283 | ENSP00000362153 |
| ENSP00000298283 | ENSP00000362744 |
| ENSP00000298283 | ENSP00000363018 |
| ENSP00000298283 | ENSP00000363676 |
| ENSP00000298283 | ENSP00000364320 |
| ENSP00000298283 | ENSP00000369757 |
| ENSP00000298283 | ENSP00000371546 |
| ENSP00000298283 | ENSP00000375730 |

|                 |                 |
|-----------------|-----------------|
| ENSP00000298283 | ENSP00000377486 |
| ENSP00000298283 | ENSP00000377640 |
| ENSP00000298283 | ENSP00000377865 |
| ENSP00000298283 | ENSP00000378160 |
| ENSP00000298283 | ENSP00000379607 |
| ENSP00000298283 | ENSP00000379888 |
| ENSP00000298283 | ENSP00000380156 |
| ENSP00000298283 | ENSP00000386717 |
| ENSP00000298283 | ENSP00000389103 |
| ENSP00000298283 | ENSP00000393241 |
| ENSP00000298283 | ENSP00000393393 |
| ENSP00000298283 | ENSP00000403175 |
| ENSP00000298283 | ENSP00000412583 |
| ENSP00000298283 | ENSP00000414321 |
| ENSP00000298283 | ENSP00000416110 |
| ENSP00000298288 | ENSP00000304102 |
| ENSP00000298288 | ENSP00000350512 |
| ENSP00000298288 | ENSP00000366729 |
| ENSP00000298288 | ENSP00000368438 |
| ENSP00000298292 | ENSP00000323275 |
| ENSP00000298292 | ENSP00000323424 |
| ENSP00000298292 | ENSP00000324122 |
| ENSP00000298292 | ENSP00000333018 |
| ENSP00000298292 | ENSP00000350011 |
| ENSP00000298292 | ENSP00000355621 |
| ENSP00000298292 | ENSP00000355899 |
| ENSP00000298292 | ENSP00000357220 |
| ENSP00000298292 | ENSP00000360497 |
| ENSP00000298292 | ENSP00000360876 |
| ENSP00000298292 | ENSP00000361010 |
| ENSP00000298292 | ENSP00000362386 |
| ENSP00000298292 | ENSP00000364298 |
| ENSP00000298292 | ENSP00000366135 |
| ENSP00000298292 | ENSP00000397530 |
| ENSP00000298292 | ENSP00000398812 |
| ENSP00000298292 | ENSP00000412439 |
| ENSP00000298295 | ENSP00000354951 |
| ENSP00000298295 | ENSP00000380702 |
| ENSP00000298310 | ENSP00000298746 |
| ENSP00000298310 | ENSP00000300648 |
| ENSP00000298310 | ENSP00000305702 |
| ENSP00000298310 | ENSP00000314311 |
| ENSP00000298310 | ENSP00000314348 |
| ENSP00000298310 | ENSP00000325312 |
| ENSP00000298310 | ENSP00000333401 |
| ENSP00000298310 | ENSP00000344460 |

|                 |                 |
|-----------------|-----------------|
| ENSP00000298310 | ENSP00000348708 |
| ENSP00000298310 | ENSP00000356290 |
| ENSP00000298310 | ENSP00000358563 |
| ENSP00000298310 | ENSP00000359345 |
| ENSP00000298310 | ENSP00000359837 |
| ENSP00000298310 | ENSP00000361982 |
| ENSP00000298310 | ENSP00000363313 |
| ENSP00000298310 | ENSP00000365773 |
| ENSP00000298310 | ENSP00000366519 |
| ENSP00000298310 | ENSP00000366672 |
| ENSP00000298310 | ENSP00000368565 |
| ENSP00000298310 | ENSP00000370258 |
| ENSP00000298310 | ENSP00000373404 |
| ENSP00000298310 | ENSP00000377486 |
| ENSP00000298310 | ENSP00000377865 |
| ENSP00000298310 | ENSP00000382392 |
| ENSP00000298310 | ENSP00000388872 |
| ENSP00000298310 | ENSP00000397598 |
| ENSP00000298317 | ENSP00000301585 |
| ENSP00000298317 | ENSP00000307567 |
| ENSP00000298317 | ENSP00000336587 |
| ENSP00000298317 | ENSP00000355890 |
| ENSP00000298317 | ENSP00000362578 |
| ENSP00000298352 | ENSP00000345917 |
| ENSP00000298352 | ENSP00000363559 |
| ENSP00000298492 | ENSP00000343412 |
| ENSP00000298492 | ENSP00000343535 |
| ENSP00000298492 | ENSP00000352408 |
| ENSP00000298492 | ENSP00000366434 |
| ENSP00000298492 | ENSP00000400500 |
| ENSP00000298532 | ENSP00000299424 |
| ENSP00000298532 | ENSP00000302478 |
| ENSP00000298532 | ENSP00000302530 |
| ENSP00000298532 | ENSP00000311135 |
| ENSP00000298532 | ENSP00000315568 |
| ENSP00000298532 | ENSP00000316240 |
| ENSP00000298532 | ENSP00000319597 |
| ENSP00000298532 | ENSP00000333667 |
| ENSP00000298532 | ENSP00000334061 |
| ENSP00000298532 | ENSP00000343557 |
| ENSP00000298532 | ENSP00000348069 |
| ENSP00000298532 | ENSP00000351137 |
| ENSP00000298532 | ENSP00000353622 |
| ENSP00000298532 | ENSP00000354251 |
| ENSP00000298532 | ENSP00000354522 |
| ENSP00000298532 | ENSP00000357631 |

|                 |                 |
|-----------------|-----------------|
| ENSP00000298532 | ENSP00000360497 |
| ENSP00000298532 | ENSP00000360532 |
| ENSP00000298532 | ENSP00000362717 |
| ENSP00000298532 | ENSP00000371236 |
| ENSP00000298532 | ENSP00000376973 |
| ENSP00000298532 | ENSP00000381657 |
| ENSP00000298532 | ENSP00000382392 |
| ENSP00000298532 | ENSP00000386759 |
| ENSP00000298532 | ENSP00000387006 |
| ENSP00000298532 | ENSP00000393953 |
| ENSP00000298545 | ENSP00000304802 |
| ENSP00000298545 | ENSP00000312042 |
| ENSP00000298545 | ENSP00000346577 |
| ENSP00000298545 | ENSP00000362993 |
| ENSP00000298546 | ENSP00000385746 |
| ENSP00000298546 | ENSP00000397435 |
| ENSP00000298552 | ENSP00000298630 |
| ENSP00000298552 | ENSP00000306100 |
| ENSP00000298552 | ENSP00000310040 |
| ENSP00000298552 | ENSP00000313034 |
| ENSP00000298552 | ENSP00000313420 |
| ENSP00000298552 | ENSP00000314499 |
| ENSP00000298552 | ENSP00000316879 |
| ENSP00000298552 | ENSP00000341189 |
| ENSP00000298552 | ENSP00000344666 |
| ENSP00000298552 | ENSP00000347733 |
| ENSP00000298552 | ENSP00000348813 |
| ENSP00000298552 | ENSP00000349748 |
| ENSP00000298552 | ENSP00000350785 |
| ENSP00000298552 | ENSP00000352121 |
| ENSP00000298552 | ENSP00000354558 |
| ENSP00000298552 | ENSP00000355231 |
| ENSP00000298552 | ENSP00000355499 |
| ENSP00000298552 | ENSP00000402515 |
| ENSP00000298569 | ENSP00000300145 |
| ENSP00000298569 | ENSP00000301587 |
| ENSP00000298569 | ENSP00000302114 |
| ENSP00000298569 | ENSP00000317780 |
| ENSP00000298569 | ENSP00000325863 |
| ENSP00000298569 | ENSP00000338345 |
| ENSP00000298569 | ENSP00000349016 |
| ENSP00000298569 | ENSP00000350249 |
| ENSP00000298569 | ENSP00000353826 |
| ENSP00000298569 | ENSP00000354876 |
| ENSP00000298569 | ENSP00000361686 |
| ENSP00000298569 | ENSP00000368140 |

|                 |                 |
|-----------------|-----------------|
| ENSP00000298585 | ENSP00000311202 |
| ENSP00000298585 | ENSP00000361990 |
| ENSP00000298585 | ENSP00000396068 |
| ENSP00000298596 | ENSP00000359258 |
| ENSP00000298630 | ENSP00000318604 |
| ENSP00000298630 | ENSP00000329933 |
| ENSP00000298630 | ENSP00000361186 |
| ENSP00000298630 | ENSP00000372857 |
| ENSP00000298694 | ENSP00000313172 |
| ENSP00000298694 | ENSP00000321106 |
| ENSP00000298694 | ENSP00000340820 |
| ENSP00000298694 | ENSP00000359100 |
| ENSP00000298694 | ENSP00000380702 |
| ENSP00000298694 | ENSP00000394863 |
| ENSP00000298717 | ENSP00000322316 |
| ENSP00000298717 | ENSP00000351141 |
| ENSP00000298717 | ENSP00000369335 |
| ENSP00000298717 | ENSP00000373474 |
| ENSP00000298746 | ENSP00000302768 |
| ENSP00000298746 | ENSP00000304668 |
| ENSP00000298746 | ENSP00000305702 |
| ENSP00000298746 | ENSP00000308332 |
| ENSP00000298746 | ENSP00000309433 |
| ENSP00000298746 | ENSP00000311135 |
| ENSP00000298746 | ENSP00000312735 |
| ENSP00000298746 | ENSP00000314311 |
| ENSP00000298746 | ENSP00000314348 |
| ENSP00000298746 | ENSP00000314949 |
| ENSP00000298746 | ENSP00000316879 |
| ENSP00000298746 | ENSP00000317992 |
| ENSP00000298746 | ENSP00000318195 |
| ENSP00000298746 | ENSP00000318646 |
| ENSP00000298746 | ENSP00000320917 |
| ENSP00000298746 | ENSP00000321449 |
| ENSP00000298746 | ENSP00000322396 |
| ENSP00000298746 | ENSP00000323858 |
| ENSP00000298746 | ENSP00000324122 |
| ENSP00000298746 | ENSP00000326806 |
| ENSP00000298746 | ENSP00000328690 |
| ENSP00000298746 | ENSP00000329715 |
| ENSP00000298746 | ENSP00000331817 |
| ENSP00000298746 | ENSP00000332103 |
| ENSP00000298746 | ENSP00000332198 |
| ENSP00000298746 | ENSP00000336712 |
| ENSP00000298746 | ENSP00000337839 |
| ENSP00000298746 | ENSP00000338573 |



|                 |                 |
|-----------------|-----------------|
| ENSP00000298746 | ENSP00000340281 |
| ENSP00000298746 | ENSP00000340766 |
| ENSP00000298746 | ENSP00000343081 |
| ENSP00000298746 | ENSP00000343557 |
| ENSP00000298746 | ENSP00000344393 |
| ENSP00000298746 | ENSP00000346120 |
| ENSP00000298746 | ENSP00000346725 |
| ENSP00000298746 | ENSP00000348722 |
| ENSP00000298746 | ENSP00000350011 |
| ENSP00000298746 | ENSP00000350249 |
| ENSP00000298746 | ENSP00000352738 |
| ENSP00000298746 | ENSP00000354040 |
| ENSP00000298746 | ENSP00000354125 |
| ENSP00000298746 | ENSP00000354812 |
| ENSP00000298746 | ENSP00000355261 |
| ENSP00000298746 | ENSP00000356476 |
| ENSP00000298746 | ENSP00000358140 |
| ENSP00000298746 | ENSP00000358812 |
| ENSP00000298746 | ENSP00000359454 |
| ENSP00000298746 | ENSP00000360031 |
| ENSP00000298746 | ENSP00000360412 |
| ENSP00000298746 | ENSP00000360532 |
| ENSP00000298746 | ENSP00000360828 |
| ENSP00000298746 | ENSP00000361076 |
| ENSP00000298746 | ENSP00000361232 |
| ENSP00000298746 | ENSP00000361465 |
| ENSP00000298746 | ENSP00000361949 |
| ENSP00000298746 | ENSP00000362153 |
| ENSP00000298746 | ENSP00000362744 |
| ENSP00000298746 | ENSP00000363559 |
| ENSP00000298746 | ENSP00000363944 |
| ENSP00000298746 | ENSP00000364289 |
| ENSP00000298746 | ENSP00000365806 |
| ENSP00000298746 | ENSP00000365837 |
| ENSP00000298746 | ENSP00000366135 |
| ENSP00000298746 | ENSP00000366557 |
| ENSP00000298746 | ENSP00000366843 |
| ENSP00000298746 | ENSP00000367029 |
| ENSP00000298746 | ENSP00000368589 |
| ENSP00000298746 | ENSP00000368887 |
| ENSP00000298746 | ENSP00000370258 |
| ENSP00000298746 | ENSP00000370589 |
| ENSP00000298746 | ENSP00000370741 |
| ENSP00000298746 | ENSP00000371451 |
| ENSP00000298746 | ENSP00000372199 |
| ENSP00000298746 | ENSP00000373090 |

|                 |                 |
|-----------------|-----------------|
| ENSP00000298746 | ENSP00000374280 |
| ENSP00000298746 | ENSP00000374390 |
| ENSP00000298746 | ENSP00000379888 |
| ENSP00000298746 | ENSP00000380129 |
| ENSP00000298746 | ENSP00000380453 |
| ENSP00000298746 | ENSP00000380982 |
| ENSP00000298746 | ENSP00000392028 |
| ENSP00000298746 | ENSP00000394290 |
| ENSP00000298746 | ENSP00000396704 |
| ENSP00000298746 | ENSP00000403576 |
| ENSP00000298746 | ENSP00000409074 |
| ENSP00000298746 | ENSP00000409367 |
| ENSP00000298746 | ENSP00000411162 |
| ENSP00000298746 | ENSP00000412566 |
| ENSP00000298746 | ENSP00000417229 |
| ENSP00000298767 | ENSP00000313851 |
| ENSP00000298767 | ENSP00000326261 |
| ENSP00000298767 | ENSP00000354720 |
| ENSP00000298767 | ENSP00000358497 |
| ENSP00000298767 | ENSP00000372689 |
| ENSP00000298832 | ENSP00000313171 |
| ENSP00000298832 | ENSP00000320503 |
| ENSP00000298832 | ENSP00000373715 |
| ENSP00000298852 | ENSP00000299259 |
| ENSP00000298852 | ENSP00000302830 |
| ENSP00000298852 | ENSP00000309474 |
| ENSP00000298852 | ENSP00000310129 |
| ENSP00000298852 | ENSP00000311083 |
| ENSP00000298852 | ENSP00000311665 |
| ENSP00000298852 | ENSP00000312326 |
| ENSP00000298852 | ENSP00000313953 |
| ENSP00000298852 | ENSP00000314004 |
| ENSP00000298852 | ENSP00000314949 |
| ENSP00000298852 | ENSP00000316328 |
| ENSP00000298852 | ENSP00000318861 |
| ENSP00000298852 | ENSP00000319977 |
| ENSP00000298852 | ENSP00000320508 |
| ENSP00000298852 | ENSP00000323246 |
| ENSP00000298852 | ENSP00000325919 |
| ENSP00000298852 | ENSP00000329466 |
| ENSP00000298852 | ENSP00000329715 |
| ENSP00000298852 | ENSP00000333122 |
| ENSP00000298852 | ENSP00000337501 |
| ENSP00000298852 | ENSP00000341243 |
| ENSP00000298852 | ENSP00000344741 |
| ENSP00000298852 | ENSP00000346453 |

|                 |                 |
|-----------------|-----------------|
| ENSP00000298852 | ENSP00000347997 |
| ENSP00000298852 | ENSP00000348442 |
| ENSP00000298852 | ENSP00000349970 |
| ENSP00000298852 | ENSP00000350708 |
| ENSP00000298852 | ENSP00000351015 |
| ENSP00000298852 | ENSP00000351908 |
| ENSP00000298852 | ENSP00000352219 |
| ENSP00000298852 | ENSP00000353622 |
| ENSP00000298852 | ENSP00000354883 |
| ENSP00000298852 | ENSP00000355153 |
| ENSP00000298852 | ENSP00000355865 |
| ENSP00000298852 | ENSP00000360025 |
| ENSP00000298852 | ENSP00000360532 |
| ENSP00000298852 | ENSP00000361699 |
| ENSP00000298852 | ENSP00000362334 |
| ENSP00000298852 | ENSP00000362399 |
| ENSP00000298852 | ENSP00000363944 |
| ENSP00000298852 | ENSP00000366249 |
| ENSP00000298852 | ENSP00000369531 |
| ENSP00000298852 | ENSP00000370222 |
| ENSP00000298852 | ENSP00000377384 |
| ENSP00000298852 | ENSP00000384211 |
| ENSP00000298852 | ENSP00000396068 |
| ENSP00000298852 | ENSP00000396937 |
| ENSP00000298852 | ENSP00000417281 |
| ENSP00000298852 | ENSP00000417748 |
| ENSP00000298852 | ENSP00000417763 |
| ENSP00000298852 | ENSP00000418734 |
| ENSP00000298854 | ENSP00000312435 |
| ENSP00000298854 | ENSP00000313829 |
| ENSP00000298854 | ENSP00000325376 |
| ENSP00000298854 | ENSP00000354201 |
| ENSP00000298854 | ENSP00000363571 |
| ENSP00000298854 | ENSP00000364212 |
| ENSP00000298854 | ENSP00000382064 |
| ENSP00000298910 | ENSP00000300688 |
| ENSP00000298910 | ENSP00000323856 |
| ENSP00000298910 | ENSP00000336712 |
| ENSP00000298910 | ENSP00000338345 |
| ENSP00000298910 | ENSP00000346550 |
| ENSP00000298910 | ENSP00000355865 |
| ENSP00000298910 | ENSP00000365147 |
| ENSP00000298910 | ENSP00000380431 |
| ENSP00000298910 | ENSP00000381293 |
| ENSP00000298937 | ENSP00000299601 |
| ENSP00000298937 | ENSP00000302801 |

|                 |                 |
|-----------------|-----------------|
| ENSP00000298937 | ENSP00000307684 |
| ENSP00000298937 | ENSP00000311665 |
| ENSP00000298937 | ENSP00000318313 |
| ENSP00000298937 | ENSP00000320566 |
| ENSP00000298937 | ENSP00000325677 |
| ENSP00000298937 | ENSP00000327716 |
| ENSP00000298937 | ENSP00000334061 |
| ENSP00000298937 | ENSP00000334188 |
| ENSP00000298937 | ENSP00000336842 |
| ENSP00000298937 | ENSP00000336868 |
| ENSP00000298937 | ENSP00000339449 |
| ENSP00000298937 | ENSP00000344504 |
| ENSP00000298937 | ENSP00000345702 |
| ENSP00000298937 | ENSP00000346453 |
| ENSP00000298937 | ENSP00000348129 |
| ENSP00000298937 | ENSP00000348722 |
| ENSP00000298937 | ENSP00000350967 |
| ENSP00000298937 | ENSP00000353622 |
| ENSP00000298937 | ENSP00000355013 |
| ENSP00000298937 | ENSP00000355051 |
| ENSP00000298937 | ENSP00000356405 |
| ENSP00000298937 | ENSP00000356641 |
| ENSP00000298937 | ENSP00000356774 |
| ENSP00000298937 | ENSP00000360116 |
| ENSP00000298937 | ENSP00000360473 |
| ENSP00000298937 | ENSP00000360515 |
| ENSP00000298937 | ENSP00000360676 |
| ENSP00000298937 | ENSP00000362576 |
| ENSP00000298937 | ENSP00000363308 |
| ENSP00000298937 | ENSP00000363779 |
| ENSP00000298937 | ENSP00000374280 |
| ENSP00000298937 | ENSP00000374399 |
| ENSP00000298937 | ENSP00000384490 |
| ENSP00000298937 | ENSP00000388320 |
| ENSP00000298937 | ENSP00000397259 |
| ENSP00000298937 | ENSP00000409275 |
| ENSP00000298937 | ENSP00000412922 |
| ENSP00000298999 | ENSP00000319240 |
| ENSP00000298999 | ENSP00000354125 |
| ENSP00000298999 | ENSP00000388330 |
| ENSP00000299045 | ENSP00000359454 |
| ENSP00000299045 | ENSP00000368565 |
| ENSP00000299084 | ENSP00000313391 |
| ENSP00000299084 | ENSP00000338127 |
| ENSP00000299106 | ENSP00000349465 |
| ENSP00000299106 | ENSP00000363921 |

|                 |                 |
|-----------------|-----------------|
| ENSP00000299138 | ENSP00000300896 |
| ENSP00000299138 | ENSP00000304292 |
| ENSP00000299138 | ENSP00000305459 |
| ENSP00000299138 | ENSP00000308496 |
| ENSP00000299138 | ENSP00000309457 |
| ENSP00000299138 | ENSP00000326534 |
| ENSP00000299138 | ENSP00000329858 |
| ENSP00000299138 | ENSP00000331201 |
| ENSP00000299138 | ENSP00000340836 |
| ENSP00000299138 | ENSP00000349437 |
| ENSP00000299138 | ENSP00000350854 |
| ENSP00000299138 | ENSP00000351346 |
| ENSP00000299138 | ENSP00000352175 |
| ENSP00000299138 | ENSP00000354522 |
| ENSP00000299138 | ENSP00000356146 |
| ENSP00000299138 | ENSP00000358715 |
| ENSP00000299138 | ENSP00000360183 |
| ENSP00000299138 | ENSP00000360215 |
| ENSP00000299138 | ENSP00000363349 |
| ENSP00000299138 | ENSP00000377665 |
| ENSP00000299138 | ENSP00000397441 |
| ENSP00000299138 | ENSP00000402240 |
| ENSP00000299138 | ENSP00000402935 |
| ENSP00000299163 | ENSP00000311579 |
| ENSP00000299163 | ENSP00000324292 |
| ENSP00000299163 | ENSP00000357914 |
| ENSP00000299163 | ENSP00000381045 |
| ENSP00000299163 | ENSP00000410926 |
| ENSP00000299166 | ENSP00000353575 |
| ENSP00000299206 | ENSP00000310129 |
| ENSP00000299206 | ENSP00000311873 |
| ENSP00000299206 | ENSP00000318977 |
| ENSP00000299206 | ENSP00000322570 |
| ENSP00000299206 | ENSP00000347836 |
| ENSP00000299206 | ENSP00000347978 |
| ENSP00000299206 | ENSP00000348442 |
| ENSP00000299206 | ENSP00000349393 |
| ENSP00000299206 | ENSP00000351284 |
| ENSP00000299206 | ENSP00000351697 |
| ENSP00000299206 | ENSP00000367787 |
| ENSP00000299206 | ENSP00000368349 |
| ENSP00000299206 | ENSP00000368438 |
| ENSP00000299206 | ENSP00000396937 |
| ENSP00000299206 | ENSP00000418734 |
| ENSP00000299238 | ENSP00000380982 |
| ENSP00000299259 | ENSP00000301764 |

|                 |                 |
|-----------------|-----------------|
| ENSP00000299259 | ENSP00000304102 |
| ENSP00000299259 | ENSP00000309474 |
| ENSP00000299259 | ENSP00000310129 |
| ENSP00000299259 | ENSP00000318775 |
| ENSP00000299259 | ENSP00000320648 |
| ENSP00000299259 | ENSP00000321711 |
| ENSP00000299259 | ENSP00000326477 |
| ENSP00000299259 | ENSP00000333568 |
| ENSP00000299259 | ENSP00000334188 |
| ENSP00000299259 | ENSP00000339109 |
| ENSP00000299259 | ENSP00000339353 |
| ENSP00000299259 | ENSP00000344456 |
| ENSP00000299259 | ENSP00000346340 |
| ENSP00000299259 | ENSP00000348442 |
| ENSP00000299259 | ENSP00000348554 |
| ENSP00000299259 | ENSP00000349970 |
| ENSP00000299259 | ENSP00000350512 |
| ENSP00000299259 | ENSP00000353622 |
| ENSP00000299259 | ENSP00000355958 |
| ENSP00000299259 | ENSP00000356331 |
| ENSP00000299259 | ENSP00000356641 |
| ENSP00000299259 | ENSP00000357965 |
| ENSP00000299259 | ENSP00000357980 |
| ENSP00000299259 | ENSP00000359206 |
| ENSP00000299259 | ENSP00000362413 |
| ENSP00000299259 | ENSP00000364929 |
| ENSP00000299259 | ENSP00000366434 |
| ENSP00000299259 | ENSP00000368253 |
| ENSP00000299259 | ENSP00000384211 |
| ENSP00000299259 | ENSP00000386394 |
| ENSP00000299259 | ENSP00000390783 |
| ENSP00000299314 | ENSP00000355596 |
| ENSP00000299335 | ENSP00000355185 |
| ENSP00000299335 | ENSP00000357973 |
| ENSP00000299335 | ENSP00000358576 |
| ENSP00000299335 | ENSP00000359976 |
| ENSP00000299335 | ENSP00000360782 |
| ENSP00000299335 | ENSP00000361042 |
| ENSP00000299335 | ENSP00000367527 |
| ENSP00000299381 | ENSP00000314004 |
| ENSP00000299381 | ENSP00000317872 |
| ENSP00000299381 | ENSP00000318775 |
| ENSP00000299381 | ENSP00000339109 |
| ENSP00000299381 | ENSP00000344936 |
| ENSP00000299381 | ENSP00000346987 |
| ENSP00000299381 | ENSP00000348554 |

|                 |                 |
|-----------------|-----------------|
| ENSP00000299381 | ENSP00000363322 |
| ENSP00000299381 | ENSP00000378350 |
| ENSP00000299381 | ENSP00000394394 |
| ENSP00000299424 | ENSP00000304704 |
| ENSP00000299424 | ENSP00000305790 |
| ENSP00000299424 | ENSP00000306682 |
| ENSP00000299424 | ENSP00000306983 |
| ENSP00000299424 | ENSP00000307208 |
| ENSP00000299424 | ENSP00000307684 |
| ENSP00000299424 | ENSP00000312411 |
| ENSP00000299424 | ENSP00000312735 |
| ENSP00000299424 | ENSP00000314949 |
| ENSP00000299424 | ENSP00000316114 |
| ENSP00000299424 | ENSP00000320949 |
| ENSP00000299424 | ENSP00000324122 |
| ENSP00000299424 | ENSP00000325677 |
| ENSP00000299424 | ENSP00000329029 |
| ENSP00000299424 | ENSP00000336750 |
| ENSP00000299424 | ENSP00000340271 |
| ENSP00000299424 | ENSP00000341805 |
| ENSP00000299424 | ENSP00000344537 |
| ENSP00000299424 | ENSP00000345702 |
| ENSP00000299424 | ENSP00000347733 |
| ENSP00000299424 | ENSP00000347978 |
| ENSP00000299424 | ENSP00000350283 |
| ENSP00000299424 | ENSP00000351113 |
| ENSP00000299424 | ENSP00000354633 |
| ENSP00000299424 | ENSP00000355013 |
| ENSP00000299424 | ENSP00000355051 |
| ENSP00000299424 | ENSP00000356405 |
| ENSP00000299424 | ENSP00000356848 |
| ENSP00000299424 | ENSP00000358854 |
| ENSP00000299424 | ENSP00000359531 |
| ENSP00000299424 | ENSP00000360515 |
| ENSP00000299424 | ENSP00000361180 |
| ENSP00000299424 | ENSP00000361824 |
| ENSP00000299424 | ENSP00000362068 |
| ENSP00000299424 | ENSP00000362424 |
| ENSP00000299424 | ENSP00000366974 |
| ENSP00000299424 | ENSP00000367406 |
| ENSP00000299424 | ENSP00000369695 |
| ENSP00000299424 | ENSP00000369716 |
| ENSP00000299424 | ENSP00000373702 |
| ENSP00000299424 | ENSP00000373952 |
| ENSP00000299424 | ENSP00000377747 |
| ENSP00000299424 | ENSP00000392028 |

|                 |                 |
|-----------------|-----------------|
| ENSP00000299424 | ENSP00000397259 |
| ENSP00000299424 | ENSP00000398824 |
| ENSP00000299424 | ENSP00000403852 |
| ENSP00000299427 | ENSP00000309572 |
| ENSP00000299427 | ENSP00000343535 |
| ENSP00000299427 | ENSP00000350249 |
| ENSP00000299427 | ENSP00000378089 |
| ENSP00000299440 | ENSP00000300574 |
| ENSP00000299440 | ENSP00000301764 |
| ENSP00000299440 | ENSP00000308620 |
| ENSP00000299440 | ENSP00000343701 |
| ENSP00000299440 | ENSP00000350767 |
| ENSP00000299543 | ENSP00000299601 |
| ENSP00000299543 | ENSP00000300651 |
| ENSP00000299543 | ENSP00000301788 |
| ENSP00000299543 | ENSP00000310260 |
| ENSP00000299543 | ENSP00000312735 |
| ENSP00000299543 | ENSP00000313420 |
| ENSP00000299543 | ENSP00000314949 |
| ENSP00000299543 | ENSP00000315693 |
| ENSP00000299543 | ENSP00000318641 |
| ENSP00000299543 | ENSP00000319169 |
| ENSP00000299543 | ENSP00000323720 |
| ENSP00000299543 | ENSP00000324124 |
| ENSP00000299543 | ENSP00000325612 |
| ENSP00000299543 | ENSP00000326767 |
| ENSP00000299543 | ENSP00000340823 |
| ENSP00000299543 | ENSP00000342889 |
| ENSP00000299543 | ENSP00000345530 |
| ENSP00000299543 | ENSP00000348610 |
| ENSP00000299543 | ENSP00000350967 |
| ENSP00000299543 | ENSP00000355013 |
| ENSP00000299543 | ENSP00000355961 |
| ENSP00000299543 | ENSP00000356146 |
| ENSP00000299543 | ENSP00000356405 |
| ENSP00000299543 | ENSP00000357047 |
| ENSP00000299543 | ENSP00000359531 |
| ENSP00000299543 | ENSP00000363779 |
| ENSP00000299543 | ENSP00000365025 |
| ENSP00000299543 | ENSP00000368066 |
| ENSP00000299543 | ENSP00000374280 |
| ENSP00000299543 | ENSP00000377969 |
| ENSP00000299543 | ENSP00000379228 |
| ENSP00000299543 | ENSP00000385722 |
| ENSP00000299543 | ENSP00000403852 |
| ENSP00000299543 | ENSP00000412566 |



|                 |                 |
|-----------------|-----------------|
| ENSP00000299596 | ENSP00000355777 |
| ENSP00000299601 | ENSP00000300648 |
| ENSP00000299601 | ENSP00000302160 |
| ENSP00000299601 | ENSP00000302801 |
| ENSP00000299601 | ENSP00000303434 |
| ENSP00000299601 | ENSP00000304593 |
| ENSP00000299601 | ENSP00000306983 |
| ENSP00000299601 | ENSP00000307208 |
| ENSP00000299601 | ENSP00000307387 |
| ENSP00000299601 | ENSP00000308944 |
| ENSP00000299601 | ENSP00000310596 |
| ENSP00000299601 | ENSP00000311005 |
| ENSP00000299601 | ENSP00000313350 |
| ENSP00000299601 | ENSP00000314776 |
| ENSP00000299601 | ENSP00000314949 |
| ENSP00000299601 | ENSP00000320566 |
| ENSP00000299601 | ENSP00000323967 |
| ENSP00000299601 | ENSP00000325136 |
| ENSP00000299601 | ENSP00000327487 |
| ENSP00000299601 | ENSP00000327716 |
| ENSP00000299601 | ENSP00000329933 |
| ENSP00000299601 | ENSP00000334188 |
| ENSP00000299601 | ENSP00000335304 |
| ENSP00000299601 | ENSP00000336856 |
| ENSP00000299601 | ENSP00000339933 |
| ENSP00000299601 | ENSP00000340271 |
| ENSP00000299601 | ENSP00000340944 |
| ENSP00000299601 | ENSP00000343190 |
| ENSP00000299601 | ENSP00000343742 |
| ENSP00000299601 | ENSP00000344456 |
| ENSP00000299601 | ENSP00000347168 |
| ENSP00000299601 | ENSP00000348089 |
| ENSP00000299601 | ENSP00000349298 |
| ENSP00000299601 | ENSP00000350199 |
| ENSP00000299601 | ENSP00000350767 |
| ENSP00000299601 | ENSP00000350967 |
| ENSP00000299601 | ENSP00000351596 |
| ENSP00000299601 | ENSP00000351665 |
| ENSP00000299601 | ENSP00000351947 |
| ENSP00000299601 | ENSP00000353622 |
| ENSP00000299601 | ENSP00000354742 |
| ENSP00000299601 | ENSP00000355013 |
| ENSP00000299601 | ENSP00000355205 |
| ENSP00000299601 | ENSP00000356405 |
| ENSP00000299601 | ENSP00000356989 |
| ENSP00000299601 | ENSP00000357360 |

|                 |                 |
|-----------------|-----------------|
| ENSP00000299601 | ENSP00000357887 |
| ENSP00000299601 | ENSP00000358283 |
| ENSP00000299601 | ENSP00000358478 |
| ENSP00000299601 | ENSP00000359518 |
| ENSP00000299601 | ENSP00000360473 |
| ENSP00000299601 | ENSP00000361642 |
| ENSP00000299601 | ENSP00000362166 |
| ENSP00000299601 | ENSP00000362334 |
| ENSP00000299601 | ENSP00000362352 |
| ENSP00000299601 | ENSP00000362592 |
| ENSP00000299601 | ENSP00000362993 |
| ENSP00000299601 | ENSP00000363734 |
| ENSP00000299601 | ENSP00000364929 |
| ENSP00000299601 | ENSP00000365025 |
| ENSP00000299601 | ENSP00000366974 |
| ENSP00000299601 | ENSP00000367034 |
| ENSP00000299601 | ENSP00000369695 |
| ENSP00000299601 | ENSP00000369716 |
| ENSP00000299601 | ENSP00000370023 |
| ENSP00000299601 | ENSP00000370151 |
| ENSP00000299601 | ENSP00000372694 |
| ENSP00000299601 | ENSP00000374213 |
| ENSP00000299601 | ENSP00000374280 |
| ENSP00000299601 | ENSP00000374399 |
| ENSP00000299601 | ENSP00000374529 |
| ENSP00000299601 | ENSP00000376097 |
| ENSP00000299601 | ENSP00000377262 |
| ENSP00000299601 | ENSP00000377747 |
| ENSP00000299601 | ENSP00000379394 |
| ENSP00000299601 | ENSP00000386134 |
| ENSP00000299601 | ENSP00000386759 |
| ENSP00000299601 | ENSP00000386992 |
| ENSP00000299601 | ENSP00000388872 |
| ENSP00000299601 | ENSP00000390475 |
| ENSP00000299601 | ENSP00000392028 |
| ENSP00000299601 | ENSP00000393596 |
| ENSP00000299601 | ENSP00000395574 |
| ENSP00000299601 | ENSP00000397259 |
| ENSP00000299601 | ENSP00000402240 |
| ENSP00000299601 | ENSP00000412319 |
| ENSP00000299601 | ENSP00000415678 |
| ENSP00000299608 | ENSP00000343412 |
| ENSP00000299626 | ENSP00000300658 |
| ENSP00000299626 | ENSP00000319979 |
| ENSP00000299626 | ENSP00000326699 |
| ENSP00000299626 | ENSP00000333813 |

|                 |                 |
|-----------------|-----------------|
| ENSP00000299626 | ENSP00000346236 |
| ENSP00000299626 | ENSP00000350263 |
| ENSP00000299626 | ENSP00000356530 |
| ENSP00000299626 | ENSP00000360149 |
| ENSP00000299626 | ENSP00000360644 |
| ENSP00000299626 | ENSP00000361667 |
| ENSP00000299626 | ENSP00000364188 |
| ENSP00000299626 | ENSP00000380793 |
| ENSP00000299626 | ENSP00000401445 |
| ENSP00000299626 | ENSP00000415203 |
| ENSP00000299687 | ENSP00000378503 |
| ENSP00000299767 | ENSP00000304592 |
| ENSP00000299767 | ENSP00000305465 |
| ENSP00000299767 | ENSP00000307235 |
| ENSP00000299767 | ENSP00000309474 |
| ENSP00000299767 | ENSP00000310129 |
| ENSP00000299767 | ENSP00000310668 |
| ENSP00000299767 | ENSP00000317331 |
| ENSP00000299767 | ENSP00000320508 |
| ENSP00000299767 | ENSP00000323313 |
| ENSP00000299767 | ENSP00000323720 |
| ENSP00000299767 | ENSP00000331268 |
| ENSP00000299767 | ENSP00000334061 |
| ENSP00000299767 | ENSP00000337127 |
| ENSP00000299767 | ENSP00000337838 |
| ENSP00000299767 | ENSP00000338533 |
| ENSP00000299767 | ENSP00000341551 |
| ENSP00000299767 | ENSP00000342181 |
| ENSP00000299767 | ENSP00000345702 |
| ENSP00000299767 | ENSP00000348565 |
| ENSP00000299767 | ENSP00000348877 |
| ENSP00000299767 | ENSP00000352456 |
| ENSP00000299767 | ENSP00000354347 |
| ENSP00000299767 | ENSP00000355296 |
| ENSP00000299767 | ENSP00000355890 |
| ENSP00000299767 | ENSP00000358140 |
| ENSP00000299767 | ENSP00000359067 |
| ENSP00000299767 | ENSP00000359526 |
| ENSP00000299767 | ENSP00000360286 |
| ENSP00000299767 | ENSP00000360532 |
| ENSP00000299767 | ENSP00000361207 |
| ENSP00000299767 | ENSP00000361686 |
| ENSP00000299767 | ENSP00000363089 |
| ENSP00000299767 | ENSP00000364188 |
| ENSP00000299767 | ENSP00000365534 |
| ENSP00000299767 | ENSP00000366179 |

|                 |                 |
|-----------------|-----------------|
| ENSP00000299767 | ENSP00000366395 |
| ENSP00000299767 | ENSP00000367440 |
| ENSP00000299767 | ENSP00000370151 |
| ENSP00000299767 | ENSP00000370589 |
| ENSP00000299767 | ENSP00000370883 |
| ENSP00000299767 | ENSP00000373952 |
| ENSP00000299767 | ENSP00000379607 |
| ENSP00000299767 | ENSP00000382595 |
| ENSP00000299767 | ENSP00000388872 |
| ENSP00000299767 | ENSP00000391944 |
| ENSP00000299767 | ENSP00000397441 |
| ENSP00000299767 | ENSP00000407487 |
| ENSP00000299798 | ENSP00000370410 |
| ENSP00000299798 | ENSP00000389399 |
| ENSP00000299853 | ENSP00000300101 |
| ENSP00000299853 | ENSP00000302478 |
| ENSP00000299853 | ENSP00000303088 |
| ENSP00000299853 | ENSP00000314949 |
| ENSP00000299853 | ENSP00000318604 |
| ENSP00000299853 | ENSP00000320917 |
| ENSP00000299853 | ENSP00000321711 |
| ENSP00000299853 | ENSP00000324124 |
| ENSP00000299853 | ENSP00000327070 |
| ENSP00000299853 | ENSP00000331111 |
| ENSP00000299853 | ENSP00000332171 |
| ENSP00000299853 | ENSP00000333920 |
| ENSP00000299853 | ENSP00000334564 |
| ENSP00000299853 | ENSP00000337478 |
| ENSP00000299853 | ENSP00000341243 |
| ENSP00000299853 | ENSP00000347345 |
| ENSP00000299853 | ENSP00000351575 |
| ENSP00000299853 | ENSP00000360286 |
| ENSP00000299853 | ENSP00000360532 |
| ENSP00000299853 | ENSP00000361465 |
| ENSP00000299853 | ENSP00000366828 |
| ENSP00000299853 | ENSP00000366974 |
| ENSP00000299853 | ENSP00000367029 |
| ENSP00000299853 | ENSP00000378286 |
| ENSP00000299853 | ENSP00000378736 |
| ENSP00000299853 | ENSP00000383503 |
| ENSP00000299853 | ENSP00000397636 |
| ENSP00000299853 | ENSP00000403852 |
| ENSP00000299853 | ENSP00000404247 |
| ENSP00000299853 | ENSP00000405636 |
| ENSP00000299853 | ENSP00000410530 |
| ENSP00000299853 | ENSP00000410954 |

|                 |                 |
|-----------------|-----------------|
| ENSP00000299853 | ENSP00000414110 |
| ENSP00000299853 | ENSP00000416599 |
| ENSP00000300022 | ENSP00000302830 |
| ENSP00000300022 | ENSP00000320623 |
| ENSP00000300022 | ENSP00000328773 |
| ENSP00000300022 | ENSP00000351221 |
| ENSP00000300022 | ENSP00000374455 |
| ENSP00000300055 | ENSP00000390849 |
| ENSP00000300069 | ENSP00000349594 |
| ENSP00000300069 | ENSP00000360112 |
| ENSP00000300086 | ENSP00000300574 |
| ENSP00000300086 | ENSP00000305631 |
| ENSP00000300086 | ENSP00000306123 |
| ENSP00000300086 | ENSP00000310723 |
| ENSP00000300086 | ENSP00000317691 |
| ENSP00000300086 | ENSP00000319240 |
| ENSP00000300086 | ENSP00000321259 |
| ENSP00000300086 | ENSP00000325863 |
| ENSP00000300086 | ENSP00000328690 |
| ENSP00000300086 | ENSP00000330005 |
| ENSP00000300086 | ENSP00000331087 |
| ENSP00000300086 | ENSP00000336866 |
| ENSP00000300086 | ENSP00000342026 |
| ENSP00000300086 | ENSP00000343023 |
| ENSP00000300086 | ENSP00000344547 |
| ENSP00000300086 | ENSP00000350249 |
| ENSP00000300086 | ENSP00000352257 |
| ENSP00000300086 | ENSP00000352408 |
| ENSP00000300086 | ENSP00000353660 |
| ENSP00000300086 | ENSP00000353701 |
| ENSP00000300086 | ENSP00000355306 |
| ENSP00000300086 | ENSP00000355759 |
| ENSP00000300086 | ENSP00000355809 |
| ENSP00000300086 | ENSP00000356231 |
| ENSP00000300086 | ENSP00000361524 |
| ENSP00000300086 | ENSP00000361894 |
| ENSP00000300086 | ENSP00000361965 |
| ENSP00000300086 | ENSP00000362170 |
| ENSP00000300086 | ENSP00000364320 |
| ENSP00000300086 | ENSP00000365439 |
| ENSP00000300086 | ENSP00000369736 |
| ENSP00000300086 | ENSP00000376903 |
| ENSP00000300086 | ENSP00000377496 |
| ENSP00000300086 | ENSP00000403536 |
| ENSP00000300086 | ENSP00000409167 |
| ENSP00000300086 | ENSP00000417281 |

|                 |                 |
|-----------------|-----------------|
| ENSP00000300087 | ENSP00000312753 |
| ENSP00000300087 | ENSP00000408910 |
| ENSP00000300087 | ENSP00000414906 |
| ENSP00000300107 | ENSP00000301585 |
| ENSP00000300107 | ENSP00000313921 |
| ENSP00000300107 | ENSP00000317334 |
| ENSP00000300107 | ENSP00000329558 |
| ENSP00000300107 | ENSP00000340019 |
| ENSP00000300107 | ENSP00000341213 |
| ENSP00000300107 | ENSP00000352408 |
| ENSP00000300107 | ENSP00000359206 |
| ENSP00000300107 | ENSP00000361287 |
| ENSP00000300107 | ENSP00000376946 |
| ENSP00000300107 | ENSP00000386284 |
| ENSP00000300108 | ENSP00000303325 |
| ENSP00000300128 | ENSP00000302955 |
| ENSP00000300128 | ENSP00000336712 |
| ENSP00000300128 | ENSP00000345656 |
| ENSP00000300128 | ENSP00000348577 |
| ENSP00000300131 | ENSP00000369716 |
| ENSP00000300131 | ENSP00000380019 |
| ENSP00000300145 | ENSP00000319323 |
| ENSP00000300145 | ENSP00000348886 |
| ENSP00000300145 | ENSP00000352257 |
| ENSP00000300145 | ENSP00000356329 |
| ENSP00000300145 | ENSP00000356587 |
| ENSP00000300145 | ENSP00000359976 |
| ENSP00000300146 | ENSP00000300413 |
| ENSP00000300146 | ENSP00000301788 |
| ENSP00000300146 | ENSP00000302160 |
| ENSP00000300146 | ENSP00000304350 |
| ENSP00000300146 | ENSP00000304593 |
| ENSP00000300146 | ENSP00000307863 |
| ENSP00000300146 | ENSP00000310448 |
| ENSP00000300146 | ENSP00000310596 |
| ENSP00000300146 | ENSP00000315035 |
| ENSP00000300146 | ENSP00000315379 |
| ENSP00000300146 | ENSP00000315693 |
| ENSP00000300146 | ENSP00000316879 |
| ENSP00000300146 | ENSP00000318195 |
| ENSP00000300146 | ENSP00000319341 |
| ENSP00000300146 | ENSP00000320503 |
| ENSP00000300146 | ENSP00000323302 |
| ENSP00000300146 | ENSP00000323377 |
| ENSP00000300146 | ENSP00000324122 |
| ENSP00000300146 | ENSP00000326806 |

|                 |                 |
|-----------------|-----------------|
| ENSP00000300146 | ENSP00000332326 |
| ENSP00000300146 | ENSP00000334188 |
| ENSP00000300146 | ENSP00000340954 |
| ENSP00000300146 | ENSP00000342374 |
| ENSP00000300146 | ENSP00000354125 |
| ENSP00000300146 | ENSP00000354522 |
| ENSP00000300146 | ENSP00000359939 |
| ENSP00000300146 | ENSP00000361949 |
| ENSP00000300146 | ENSP00000362153 |
| ENSP00000300146 | ENSP00000362413 |
| ENSP00000300146 | ENSP00000363313 |
| ENSP00000300146 | ENSP00000364813 |
| ENSP00000300146 | ENSP00000366607 |
| ENSP00000300146 | ENSP00000369409 |
| ENSP00000300146 | ENSP00000369897 |
| ENSP00000300146 | ENSP00000372883 |
| ENSP00000300146 | ENSP00000373715 |
| ENSP00000300146 | ENSP00000378350 |
| ENSP00000300146 | ENSP00000391944 |
| ENSP00000300146 | ENSP00000396704 |
| ENSP00000300146 | ENSP00000402240 |
| ENSP00000300146 | ENSP00000403345 |
| ENSP00000300146 | ENSP00000406280 |
| ENSP00000300146 | ENSP00000410758 |
| ENSP00000300146 | ENSP00000414006 |
| ENSP00000300146 | ENSP00000414634 |
| ENSP00000300151 | ENSP00000301585 |
| ENSP00000300151 | ENSP00000302896 |
| ENSP00000300151 | ENSP00000306548 |
| ENSP00000300151 | ENSP00000307525 |
| ENSP00000300151 | ENSP00000307889 |
| ENSP00000300151 | ENSP00000308275 |
| ENSP00000300151 | ENSP00000308897 |
| ENSP00000300151 | ENSP00000309334 |
| ENSP00000300151 | ENSP00000309830 |
| ENSP00000300151 | ENSP00000311028 |
| ENSP00000300151 | ENSP00000311505 |
| ENSP00000300151 | ENSP00000311648 |
| ENSP00000300151 | ENSP00000312311 |
| ENSP00000300151 | ENSP00000315017 |
| ENSP00000300151 | ENSP00000317376 |
| ENSP00000300151 | ENSP00000318646 |
| ENSP00000300151 | ENSP00000322419 |
| ENSP00000300151 | ENSP00000326411 |
| ENSP00000300151 | ENSP00000326981 |
| ENSP00000300151 | ENSP00000333401 |

|                 |                 |
|-----------------|-----------------|
| ENSP00000300151 | ENSP00000339095 |
| ENSP00000300151 | ENSP00000339795 |
| ENSP00000300151 | ENSP00000339844 |
| ENSP00000300151 | ENSP00000339845 |
| ENSP00000300151 | ENSP00000341082 |
| ENSP00000300151 | ENSP00000343745 |
| ENSP00000300151 | ENSP00000345156 |
| ENSP00000300151 | ENSP00000346015 |
| ENSP00000300151 | ENSP00000346022 |
| ENSP00000300151 | ENSP00000346027 |
| ENSP00000300151 | ENSP00000346037 |
| ENSP00000300151 | ENSP00000346050 |
| ENSP00000300151 | ENSP00000346088 |
| ENSP00000300151 | ENSP00000349142 |
| ENSP00000300151 | ENSP00000354525 |
| ENSP00000300151 | ENSP00000356290 |
| ENSP00000300151 | ENSP00000359345 |
| ENSP00000300151 | ENSP00000361076 |
| ENSP00000300151 | ENSP00000361287 |
| ENSP00000300151 | ENSP00000362399 |
| ENSP00000300151 | ENSP00000362744 |
| ENSP00000300151 | ENSP00000363018 |
| ENSP00000300151 | ENSP00000363676 |
| ENSP00000300151 | ENSP00000364320 |
| ENSP00000300151 | ENSP00000369757 |
| ENSP00000300151 | ENSP00000371546 |
| ENSP00000300151 | ENSP00000373404 |
| ENSP00000300151 | ENSP00000375730 |
| ENSP00000300151 | ENSP00000377486 |
| ENSP00000300151 | ENSP00000377640 |
| ENSP00000300151 | ENSP00000377865 |
| ENSP00000300151 | ENSP00000378160 |
| ENSP00000300151 | ENSP00000379888 |
| ENSP00000300151 | ENSP00000380156 |
| ENSP00000300151 | ENSP00000386717 |
| ENSP00000300151 | ENSP00000389103 |
| ENSP00000300151 | ENSP00000393241 |
| ENSP00000300151 | ENSP00000393393 |
| ENSP00000300151 | ENSP00000402240 |
| ENSP00000300151 | ENSP00000403175 |
| ENSP00000300151 | ENSP00000412583 |
| ENSP00000300151 | ENSP00000414321 |
| ENSP00000300151 | ENSP00000416110 |
| ENSP00000300151 | ENSP00000417602 |
| ENSP00000300151 | ENSP00000418734 |
| ENSP00000300175 | ENSP00000313829 |



|                 |                 |
|-----------------|-----------------|
| ENSP00000300176 | ENSP00000360798 |
| ENSP00000300176 | ENSP00000370719 |
| ENSP00000300181 | ENSP00000328854 |
| ENSP00000300181 | ENSP00000332681 |
| ENSP00000300181 | ENSP00000340995 |
| ENSP00000300181 | ENSP00000347538 |
| ENSP00000300181 | ENSP00000348550 |
| ENSP00000300181 | ENSP00000351492 |
| ENSP00000300181 | ENSP00000370410 |
| ENSP00000300181 | ENSP00000371729 |
| ENSP00000300181 | ENSP00000374529 |
| ENSP00000300181 | ENSP00000378350 |
| ENSP00000300181 | ENSP00000381795 |
| ENSP00000300181 | ENSP00000386394 |
| ENSP00000300181 | ENSP00000397435 |
| ENSP00000300213 | ENSP00000326981 |
| ENSP00000300213 | ENSP00000339186 |
| ENSP00000300213 | ENSP00000350512 |
| ENSP00000300213 | ENSP00000350785 |
| ENSP00000300231 | ENSP00000304051 |
| ENSP00000300231 | ENSP00000308944 |
| ENSP00000300231 | ENSP00000312778 |
| ENSP00000300231 | ENSP00000322396 |
| ENSP00000300231 | ENSP00000324792 |
| ENSP00000300231 | ENSP00000330343 |
| ENSP00000300231 | ENSP00000334675 |
| ENSP00000300231 | ENSP00000336868 |
| ENSP00000300231 | ENSP00000343392 |
| ENSP00000300231 | ENSP00000343479 |
| ENSP00000300231 | ENSP00000345731 |
| ENSP00000300231 | ENSP00000347168 |
| ENSP00000300231 | ENSP00000347719 |
| ENSP00000300231 | ENSP00000348089 |
| ENSP00000300231 | ENSP00000348708 |
| ENSP00000300231 | ENSP00000348965 |
| ENSP00000300231 | ENSP00000350767 |
| ENSP00000300231 | ENSP00000351284 |
| ENSP00000300231 | ENSP00000352257 |
| ENSP00000300231 | ENSP00000352738 |
| ENSP00000300231 | ENSP00000355596 |
| ENSP00000300231 | ENSP00000356989 |
| ENSP00000300231 | ENSP00000360621 |
| ENSP00000300231 | ENSP00000362424 |
| ENSP00000300231 | ENSP00000366395 |
| ENSP00000300231 | ENSP00000366974 |
| ENSP00000300231 | ENSP00000367034 |

|                 |                 |
|-----------------|-----------------|
| ENSP00000300231 | ENSP00000368349 |
| ENSP00000300231 | ENSP00000368976 |
| ENSP00000300231 | ENSP00000372023 |
| ENSP00000300231 | ENSP00000374566 |
| ENSP00000300231 | ENSP00000377148 |
| ENSP00000300231 | ENSP00000377793 |
| ENSP00000300231 | ENSP00000378517 |
| ENSP00000300231 | ENSP00000380271 |
| ENSP00000300245 | ENSP00000309457 |
| ENSP00000300245 | ENSP00000309595 |
| ENSP00000300245 | ENSP00000311825 |
| ENSP00000300245 | ENSP00000312042 |
| ENSP00000300245 | ENSP00000318115 |
| ENSP00000300245 | ENSP00000320869 |
| ENSP00000300245 | ENSP00000329614 |
| ENSP00000300245 | ENSP00000335481 |
| ENSP00000300245 | ENSP00000344220 |
| ENSP00000300245 | ENSP00000349465 |
| ENSP00000300245 | ENSP00000351813 |
| ENSP00000300245 | ENSP00000354791 |
| ENSP00000300245 | ENSP00000355028 |
| ENSP00000300245 | ENSP00000360252 |
| ENSP00000300245 | ENSP00000364794 |
| ENSP00000300245 | ENSP00000369810 |
| ENSP00000300245 | ENSP00000377007 |
| ENSP00000300249 | ENSP00000300584 |
| ENSP00000300249 | ENSP00000301332 |
| ENSP00000300249 | ENSP00000301729 |
| ENSP00000300249 | ENSP00000302530 |
| ENSP00000300249 | ENSP00000305664 |
| ENSP00000300249 | ENSP00000305958 |
| ENSP00000300249 | ENSP00000308944 |
| ENSP00000300249 | ENSP00000312244 |
| ENSP00000300249 | ENSP00000313171 |
| ENSP00000300249 | ENSP00000313432 |
| ENSP00000300249 | ENSP00000320130 |
| ENSP00000300249 | ENSP00000320508 |
| ENSP00000300249 | ENSP00000322180 |
| ENSP00000300249 | ENSP00000322396 |
| ENSP00000300249 | ENSP00000324792 |
| ENSP00000300249 | ENSP00000330343 |
| ENSP00000300249 | ENSP00000331310 |
| ENSP00000300249 | ENSP00000332592 |
| ENSP00000300249 | ENSP00000334188 |
| ENSP00000300249 | ENSP00000346566 |
| ENSP00000300249 | ENSP00000347602 |

|                 |                 |
|-----------------|-----------------|
| ENSP00000300249 | ENSP00000347719 |
| ENSP00000300249 | ENSP00000348163 |
| ENSP00000300249 | ENSP00000348965 |
| ENSP00000300249 | ENSP00000349238 |
| ENSP00000300249 | ENSP00000350967 |
| ENSP00000300249 | ENSP00000351665 |
| ENSP00000300249 | ENSP00000351885 |
| ENSP00000300249 | ENSP00000353793 |
| ENSP00000300249 | ENSP00000357651 |
| ENSP00000300249 | ENSP00000360065 |
| ENSP00000300249 | ENSP00000360473 |
| ENSP00000300249 | ENSP00000361800 |
| ENSP00000300249 | ENSP00000362424 |
| ENSP00000300249 | ENSP00000368976 |
| ENSP00000300249 | ENSP00000370741 |
| ENSP00000300249 | ENSP00000372023 |
| ENSP00000300249 | ENSP00000374566 |
| ENSP00000300249 | ENSP00000377793 |
| ENSP00000300249 | ENSP00000380129 |
| ENSP00000300249 | ENSP00000382562 |
| ENSP00000300249 | ENSP00000384290 |
| ENSP00000300249 | ENSP00000386394 |
| ENSP00000300249 | ENSP00000391944 |
| ENSP00000300249 | ENSP00000414402 |
| ENSP00000300255 | ENSP00000302913 |
| ENSP00000300255 | ENSP00000317872 |
| ENSP00000300291 | ENSP00000304704 |
| ENSP00000300291 | ENSP00000304903 |
| ENSP00000300291 | ENSP00000316476 |
| ENSP00000300291 | ENSP00000327704 |
| ENSP00000300291 | ENSP00000335321 |
| ENSP00000300291 | ENSP00000336752 |
| ENSP00000300291 | ENSP00000339245 |
| ENSP00000300291 | ENSP00000345530 |
| ENSP00000300291 | ENSP00000348965 |
| ENSP00000300291 | ENSP00000358335 |
| ENSP00000300291 | ENSP00000358510 |
| ENSP00000300291 | ENSP00000360532 |
| ENSP00000300291 | ENSP00000362306 |
| ENSP00000300291 | ENSP00000362948 |
| ENSP00000300291 | ENSP00000379607 |
| ENSP00000300291 | ENSP00000386161 |
| ENSP00000300291 | ENSP00000386394 |
| ENSP00000300291 | ENSP00000391774 |
| ENSP00000300291 | ENSP00000398597 |
| ENSP00000300291 | ENSP00000401566 |

|                 |                 |
|-----------------|-----------------|
| ENSP00000300303 | ENSP00000300589 |
| ENSP00000300403 | ENSP00000300574 |
| ENSP00000300403 | ENSP00000304689 |
| ENSP00000300403 | ENSP00000343701 |
| ENSP00000300403 | ENSP00000350283 |
| ENSP00000300403 | ENSP00000360532 |
| ENSP00000300403 | ENSP00000377492 |
| ENSP00000300403 | ENSP00000378529 |
| ENSP00000300413 | ENSP00000300738 |
| ENSP00000300413 | ENSP00000301740 |
| ENSP00000300413 | ENSP00000301764 |
| ENSP00000300413 | ENSP00000302160 |
| ENSP00000300413 | ENSP00000304350 |
| ENSP00000300413 | ENSP00000304370 |
| ENSP00000300413 | ENSP00000304500 |
| ENSP00000300413 | ENSP00000305790 |
| ENSP00000300413 | ENSP00000307387 |
| ENSP00000300413 | ENSP00000307863 |
| ENSP00000300413 | ENSP00000308533 |
| ENSP00000300413 | ENSP00000308944 |
| ENSP00000300413 | ENSP00000310448 |
| ENSP00000300413 | ENSP00000310596 |
| ENSP00000300413 | ENSP00000311768 |
| ENSP00000300413 | ENSP00000313674 |
| ENSP00000300413 | ENSP00000314311 |
| ENSP00000300413 | ENSP00000315035 |
| ENSP00000300413 | ENSP00000315379 |
| ENSP00000300413 | ENSP00000318861 |
| ENSP00000300413 | ENSP00000319169 |
| ENSP00000300413 | ENSP00000319341 |
| ENSP00000300413 | ENSP00000320503 |
| ENSP00000300413 | ENSP00000321706 |
| ENSP00000300413 | ENSP00000323302 |
| ENSP00000300413 | ENSP00000324122 |
| ENSP00000300413 | ENSP00000325448 |
| ENSP00000300413 | ENSP00000326806 |
| ENSP00000300413 | ENSP00000327821 |
| ENSP00000300413 | ENSP00000334148 |
| ENSP00000300413 | ENSP00000334538 |
| ENSP00000300413 | ENSP00000335321 |
| ENSP00000300413 | ENSP00000337340 |
| ENSP00000300413 | ENSP00000337405 |
| ENSP00000300413 | ENSP00000337839 |
| ENSP00000300413 | ENSP00000339095 |
| ENSP00000300413 | ENSP00000342374 |
| ENSP00000300413 | ENSP00000343742 |

|                 |                 |
|-----------------|-----------------|
| ENSP00000300413 | ENSP00000346986 |
| ENSP00000300413 | ENSP00000348010 |
| ENSP00000300413 | ENSP00000348442 |
| ENSP00000300413 | ENSP00000351137 |
| ENSP00000300413 | ENSP00000354972 |
| ENSP00000300413 | ENSP00000357631 |
| ENSP00000300413 | ENSP00000358716 |
| ENSP00000300413 | ENSP00000359127 |
| ENSP00000300413 | ENSP00000359939 |
| ENSP00000300413 | ENSP00000360532 |
| ENSP00000300413 | ENSP00000361577 |
| ENSP00000300413 | ENSP00000362110 |
| ENSP00000300413 | ENSP00000362936 |
| ENSP00000300413 | ENSP00000363313 |
| ENSP00000300413 | ENSP00000363384 |
| ENSP00000300413 | ENSP00000364289 |
| ENSP00000300413 | ENSP00000364813 |
| ENSP00000300413 | ENSP00000366030 |
| ENSP00000300413 | ENSP00000366557 |
| ENSP00000300413 | ENSP00000366607 |
| ENSP00000300413 | ENSP00000370083 |
| ENSP00000300413 | ENSP00000370119 |
| ENSP00000300413 | ENSP00000371236 |
| ENSP00000300413 | ENSP00000371546 |
| ENSP00000300413 | ENSP00000372883 |
| ENSP00000300413 | ENSP00000373715 |
| ENSP00000300413 | ENSP00000376758 |
| ENSP00000300413 | ENSP00000376973 |
| ENSP00000300413 | ENSP00000400591 |
| ENSP00000300413 | ENSP00000403345 |
| ENSP00000300413 | ENSP00000406280 |
| ENSP00000300413 | ENSP00000410758 |
| ENSP00000300413 | ENSP00000412566 |
| ENSP00000300413 | ENSP00000414006 |
| ENSP00000300413 | ENSP00000414634 |
| ENSP00000300417 | ENSP00000313881 |
| ENSP00000300417 | ENSP00000322579 |
| ENSP00000300417 | ENSP00000347836 |
| ENSP00000300417 | ENSP00000379500 |
| ENSP00000300441 | ENSP00000348762 |
| ENSP00000300452 | ENSP00000322316 |
| ENSP00000300452 | ENSP00000355739 |
| ENSP00000300452 | ENSP00000359385 |
| ENSP00000300482 | ENSP00000399511 |
| ENSP00000300574 | ENSP00000302530 |
| ENSP00000300574 | ENSP00000303507 |

|                 |                 |
|-----------------|-----------------|
| ENSP00000300574 | ENSP00000308774 |
| ENSP00000300574 | ENSP00000309230 |
| ENSP00000300574 | ENSP00000310561 |
| ENSP00000300574 | ENSP00000313829 |
| ENSP00000300574 | ENSP00000314036 |
| ENSP00000300574 | ENSP00000316460 |
| ENSP00000300574 | ENSP00000317327 |
| ENSP00000300574 | ENSP00000323424 |
| ENSP00000300574 | ENSP00000323856 |
| ENSP00000300574 | ENSP00000327145 |
| ENSP00000300574 | ENSP00000329357 |
| ENSP00000300574 | ENSP00000335306 |
| ENSP00000300574 | ENSP00000341138 |
| ENSP00000300574 | ENSP00000341189 |
| ENSP00000300574 | ENSP00000341208 |
| ENSP00000300574 | ENSP00000341658 |
| ENSP00000300574 | ENSP00000341957 |
| ENSP00000300574 | ENSP00000346879 |
| ENSP00000300574 | ENSP00000347942 |
| ENSP00000300574 | ENSP00000350249 |
| ENSP00000300574 | ENSP00000350297 |
| ENSP00000300574 | ENSP00000351811 |
| ENSP00000300574 | ENSP00000351926 |
| ENSP00000300574 | ENSP00000352121 |
| ENSP00000300574 | ENSP00000352425 |
| ENSP00000300574 | ENSP00000353154 |
| ENSP00000300574 | ENSP00000353462 |
| ENSP00000300574 | ENSP00000354341 |
| ENSP00000300574 | ENSP00000356191 |
| ENSP00000300574 | ENSP00000356595 |
| ENSP00000300574 | ENSP00000356694 |
| ENSP00000300574 | ENSP00000359489 |
| ENSP00000300574 | ENSP00000360798 |
| ENSP00000300574 | ENSP00000361202 |
| ENSP00000300574 | ENSP00000361264 |
| ENSP00000300574 | ENSP00000363649 |
| ENSP00000300574 | ENSP00000363745 |
| ENSP00000300574 | ENSP00000363763 |
| ENSP00000300574 | ENSP00000364524 |
| ENSP00000300574 | ENSP00000364912 |
| ENSP00000300574 | ENSP00000365016 |
| ENSP00000300574 | ENSP00000366603 |
| ENSP00000300574 | ENSP00000366936 |
| ENSP00000300574 | ENSP00000367439 |
| ENSP00000300574 | ENSP00000367787 |
| ENSP00000300574 | ENSP00000367972 |

|                 |                 |
|-----------------|-----------------|
| ENSP00000300574 | ENSP00000371341 |
| ENSP00000300574 | ENSP00000373952 |
| ENSP00000300574 | ENSP00000379158 |
| ENSP00000300574 | ENSP00000379946 |
| ENSP00000300574 | ENSP00000380921 |
| ENSP00000300574 | ENSP00000384675 |
| ENSP00000300574 | ENSP00000394085 |
| ENSP00000300574 | ENSP00000400258 |
| ENSP00000300574 | ENSP00000402084 |
| ENSP00000300574 | ENSP00000411286 |
| ENSP00000300574 | ENSP00000416097 |
| ENSP00000300584 | ENSP00000302530 |
| ENSP00000300584 | ENSP00000305503 |
| ENSP00000300584 | ENSP00000310668 |
| ENSP00000300584 | ENSP00000325863 |
| ENSP00000300584 | ENSP00000327009 |
| ENSP00000300584 | ENSP00000335357 |
| ENSP00000300584 | ENSP00000349785 |
| ENSP00000300584 | ENSP00000351665 |
| ENSP00000300584 | ENSP00000354916 |
| ENSP00000300584 | ENSP00000354927 |
| ENSP00000300584 | ENSP00000355721 |
| ENSP00000300584 | ENSP00000356579 |
| ENSP00000300584 | ENSP00000362578 |
| ENSP00000300584 | ENSP00000365005 |
| ENSP00000300584 | ENSP00000367030 |
| ENSP00000300584 | ENSP00000382423 |
| ENSP00000300584 | ENSP00000382562 |
| ENSP00000300589 | ENSP00000315112 |
| ENSP00000300589 | ENSP00000335657 |
| ENSP00000300589 | ENSP00000348632 |
| ENSP00000300589 | ENSP00000354159 |
| ENSP00000300589 | ENSP00000381698 |
| ENSP00000300648 | ENSP00000303315 |
| ENSP00000300648 | ENSP00000304668 |
| ENSP00000300648 | ENSP00000306080 |
| ENSP00000300648 | ENSP00000307272 |
| ENSP00000300648 | ENSP00000307525 |
| ENSP00000300648 | ENSP00000310448 |
| ENSP00000300648 | ENSP00000310668 |
| ENSP00000300648 | ENSP00000312370 |
| ENSP00000300648 | ENSP00000313603 |
| ENSP00000300648 | ENSP00000316879 |
| ENSP00000300648 | ENSP00000317334 |
| ENSP00000300648 | ENSP00000320309 |
| ENSP00000300648 | ENSP00000325448 |

|                 |                 |
|-----------------|-----------------|
| ENSP00000300648 | ENSP00000327179 |
| ENSP00000300648 | ENSP00000327821 |
| ENSP00000300648 | ENSP00000328690 |
| ENSP00000300648 | ENSP00000329466 |
| ENSP00000300648 | ENSP00000329715 |
| ENSP00000300648 | ENSP00000331817 |
| ENSP00000300648 | ENSP00000336712 |
| ENSP00000300648 | ENSP00000337340 |
| ENSP00000300648 | ENSP00000338788 |
| ENSP00000300648 | ENSP00000339145 |
| ENSP00000300648 | ENSP00000340019 |
| ENSP00000300648 | ENSP00000341213 |
| ENSP00000300648 | ENSP00000341243 |
| ENSP00000300648 | ENSP00000341382 |
| ENSP00000300648 | ENSP00000343081 |
| ENSP00000300648 | ENSP00000346453 |
| ENSP00000300648 | ENSP00000348069 |
| ENSP00000300648 | ENSP00000348577 |
| ENSP00000300648 | ENSP00000348714 |
| ENSP00000300648 | ENSP00000348722 |
| ENSP00000300648 | ENSP00000348877 |
| ENSP00000300648 | ENSP00000351284 |
| ENSP00000300648 | ENSP00000352400 |
| ENSP00000300648 | ENSP00000353622 |
| ENSP00000300648 | ENSP00000353741 |
| ENSP00000300648 | ENSP00000354347 |
| ENSP00000300648 | ENSP00000354720 |
| ENSP00000300648 | ENSP00000355013 |
| ENSP00000300648 | ENSP00000355205 |
| ENSP00000300648 | ENSP00000356405 |
| ENSP00000300648 | ENSP00000359345 |
| ENSP00000300648 | ENSP00000359454 |
| ENSP00000300648 | ENSP00000360286 |
| ENSP00000300648 | ENSP00000360532 |
| ENSP00000300648 | ENSP00000361245 |
| ENSP00000300648 | ENSP00000361287 |
| ENSP00000300648 | ENSP00000361699 |
| ENSP00000300648 | ENSP00000362105 |
| ENSP00000300648 | ENSP00000363250 |
| ENSP00000300648 | ENSP00000363944 |
| ENSP00000300648 | ENSP00000364320 |
| ENSP00000300648 | ENSP00000364543 |
| ENSP00000300648 | ENSP00000365837 |
| ENSP00000300648 | ENSP00000366135 |
| ENSP00000300648 | ENSP00000369042 |
| ENSP00000300648 | ENSP00000369897 |



|                 |                 |
|-----------------|-----------------|
| ENSP00000300648 | ENSP00000372093 |
| ENSP00000300648 | ENSP00000372199 |
| ENSP00000300648 | ENSP00000372827 |
| ENSP00000300648 | ENSP00000373082 |
| ENSP00000300648 | ENSP00000374213 |
| ENSP00000300648 | ENSP00000374280 |
| ENSP00000300648 | ENSP00000375809 |
| ENSP00000300648 | ENSP00000376946 |
| ENSP00000300648 | ENSP00000377344 |
| ENSP00000300648 | ENSP00000377944 |
| ENSP00000300648 | ENSP00000377954 |
| ENSP00000300648 | ENSP00000379217 |
| ENSP00000300648 | ENSP00000380982 |
| ENSP00000300648 | ENSP00000381863 |
| ENSP00000300648 | ENSP00000386134 |
| ENSP00000300648 | ENSP00000388920 |
| ENSP00000300648 | ENSP00000389065 |
| ENSP00000300648 | ENSP00000391944 |
| ENSP00000300648 | ENSP00000394400 |
| ENSP00000300648 | ENSP00000397441 |
| ENSP00000300648 | ENSP00000399530 |
| ENSP00000300648 | ENSP00000400626 |
| ENSP00000300648 | ENSP00000402240 |
| ENSP00000300648 | ENSP00000402338 |
| ENSP00000300648 | ENSP00000411327 |
| ENSP00000300648 | ENSP00000412310 |
| ENSP00000300648 | ENSP00000412553 |
| ENSP00000300648 | ENSP00000413319 |
| ENSP00000300648 | ENSP00000414373 |
| ENSP00000300648 | ENSP00000420357 |
| ENSP00000300651 | ENSP00000301838 |
| ENSP00000300651 | ENSP00000305422 |
| ENSP00000300651 | ENSP00000314949 |
| ENSP00000300651 | ENSP00000323720 |
| ENSP00000300651 | ENSP00000325612 |
| ENSP00000300651 | ENSP00000326767 |
| ENSP00000300651 | ENSP00000328228 |
| ENSP00000300651 | ENSP00000336750 |
| ENSP00000300651 | ENSP00000337340 |
| ENSP00000300651 | ENSP00000342343 |
| ENSP00000300651 | ENSP00000345681 |
| ENSP00000300651 | ENSP00000346634 |
| ENSP00000300651 | ENSP00000346886 |
| ENSP00000300651 | ENSP00000347733 |
| ENSP00000300651 | ENSP00000348069 |
| ENSP00000300651 | ENSP00000348610 |

|                 |                 |
|-----------------|-----------------|
| ENSP00000300651 | ENSP00000350283 |
| ENSP00000300651 | ENSP00000351894 |
| ENSP00000300651 | ENSP00000354681 |
| ENSP00000300651 | ENSP00000354951 |
| ENSP00000300651 | ENSP00000355759 |
| ENSP00000300651 | ENSP00000357047 |
| ENSP00000300651 | ENSP00000357907 |
| ENSP00000300651 | ENSP00000360515 |
| ENSP00000300651 | ENSP00000362948 |
| ENSP00000300651 | ENSP00000363193 |
| ENSP00000300651 | ENSP00000403852 |
| ENSP00000300651 | ENSP00000417281 |
| ENSP00000300658 | ENSP00000306124 |
| ENSP00000300658 | ENSP00000308496 |
| ENSP00000300658 | ENSP00000311200 |
| ENSP00000300658 | ENSP00000319979 |
| ENSP00000300658 | ENSP00000326699 |
| ENSP00000300658 | ENSP00000340466 |
| ENSP00000300658 | ENSP00000346809 |
| ENSP00000300658 | ENSP00000349970 |
| ENSP00000300658 | ENSP00000359552 |
| ENSP00000300658 | ENSP00000372697 |
| ENSP00000300658 | ENSP00000376268 |
| ENSP00000300658 | ENSP00000390831 |
| ENSP00000300658 | ENSP00000391197 |
| ENSP00000300658 | ENSP00000402240 |
| ENSP00000300658 | ENSP00000404016 |
| ENSP00000300658 | ENSP00000406988 |
| ENSP00000300658 | ENSP00000409952 |
| ENSP00000300659 | ENSP00000306245 |
| ENSP00000300659 | ENSP00000333920 |
| ENSP00000300659 | ENSP00000384523 |
| ENSP00000300688 | ENSP00000301585 |
| ENSP00000300688 | ENSP00000301587 |
| ENSP00000300688 | ENSP00000306003 |
| ENSP00000300688 | ENSP00000307275 |
| ENSP00000300688 | ENSP00000320236 |
| ENSP00000300688 | ENSP00000358737 |
| ENSP00000300688 | ENSP00000370414 |
| ENSP00000300688 | ENSP00000387262 |
| ENSP00000300688 | ENSP00000389649 |
| ENSP00000300688 | ENSP00000397435 |
| ENSP00000300738 | ENSP00000302111 |
| ENSP00000300738 | ENSP00000302955 |
| ENSP00000300738 | ENSP00000311873 |
| ENSP00000300738 | ENSP00000312870 |

|                 |                 |
|-----------------|-----------------|
| ENSP00000300738 | ENSP00000313171 |
| ENSP00000300738 | ENSP00000315644 |
| ENSP00000300738 | ENSP00000318977 |
| ENSP00000300738 | ENSP00000323439 |
| ENSP00000300738 | ENSP00000332208 |
| ENSP00000300738 | ENSP00000341243 |
| ENSP00000300738 | ENSP00000341382 |
| ENSP00000300738 | ENSP00000343741 |
| ENSP00000300738 | ENSP00000344460 |
| ENSP00000300738 | ENSP00000344648 |
| ENSP00000300738 | ENSP00000347232 |
| ENSP00000300738 | ENSP00000347836 |
| ENSP00000300738 | ENSP00000347978 |
| ENSP00000300738 | ENSP00000348565 |
| ENSP00000300738 | ENSP00000351015 |
| ENSP00000300738 | ENSP00000352738 |
| ENSP00000300738 | ENSP00000354558 |
| ENSP00000300738 | ENSP00000354720 |
| ENSP00000300738 | ENSP00000354957 |
| ENSP00000300738 | ENSP00000355629 |
| ENSP00000300738 | ENSP00000357283 |
| ENSP00000300738 | ENSP00000360031 |
| ENSP00000300738 | ENSP00000360268 |
| ENSP00000300738 | ENSP00000360782 |
| ENSP00000300738 | ENSP00000361699 |
| ENSP00000300738 | ENSP00000362344 |
| ENSP00000300738 | ENSP00000369411 |
| ENSP00000300738 | ENSP00000370151 |
| ENSP00000300738 | ENSP00000372023 |
| ENSP00000300738 | ENSP00000372316 |
| ENSP00000300738 | ENSP00000379607 |
| ENSP00000300738 | ENSP00000396937 |
| ENSP00000300738 | ENSP00000397598 |
| ENSP00000300738 | ENSP00000397644 |
| ENSP00000300738 | ENSP00000402515 |
| ENSP00000300738 | ENSP00000420588 |
| ENSP00000300784 | ENSP00000359211 |
| ENSP00000300835 | ENSP00000340237 |
| ENSP00000300896 | ENSP00000305682 |
| ENSP00000300896 | ENSP00000320309 |
| ENSP00000300896 | ENSP00000321449 |
| ENSP00000300896 | ENSP00000367498 |
| ENSP00000300896 | ENSP00000368438 |
| ENSP00000300896 | ENSP00000380460 |
| ENSP00000300917 | ENSP00000402515 |
| ENSP00000301011 | ENSP00000315859 |

|                 |                 |
|-----------------|-----------------|
| ENSP00000301011 | ENSP00000329466 |
| ENSP00000301011 | ENSP00000351947 |
| ENSP00000301012 | ENSP00000320658 |
| ENSP00000301012 | ENSP00000362576 |
| ENSP00000301012 | ENSP00000367208 |
| ENSP00000301012 | ENSP00000386621 |
| ENSP00000301019 | ENSP00000301764 |
| ENSP00000301019 | ENSP00000302530 |
| ENSP00000301019 | ENSP00000312870 |
| ENSP00000301019 | ENSP00000313420 |
| ENSP00000301019 | ENSP00000322915 |
| ENSP00000301019 | ENSP00000324020 |
| ENSP00000301019 | ENSP00000336587 |
| ENSP00000301019 | ENSP00000342434 |
| ENSP00000301019 | ENSP00000343741 |
| ENSP00000301019 | ENSP00000350094 |
| ENSP00000301019 | ENSP00000350512 |
| ENSP00000301019 | ENSP00000354522 |
| ENSP00000301019 | ENSP00000355922 |
| ENSP00000301019 | ENSP00000357283 |
| ENSP00000301019 | ENSP00000360532 |
| ENSP00000301019 | ENSP00000360621 |
| ENSP00000301019 | ENSP00000362578 |
| ENSP00000301019 | ENSP00000366030 |
| ENSP00000301019 | ENSP00000368438 |
| ENSP00000301019 | ENSP00000378350 |
| ENSP00000301019 | ENSP00000378529 |
| ENSP00000301019 | ENSP00000384109 |
| ENSP00000301019 | ENSP00000394394 |
| ENSP00000301019 | ENSP00000402515 |
| ENSP00000301021 | ENSP00000349824 |
| ENSP00000301021 | ENSP00000369071 |
| ENSP00000301021 | ENSP00000409231 |
| ENSP00000301030 | ENSP00000399968 |
| ENSP00000301180 | ENSP00000348762 |
| ENSP00000301263 | ENSP00000346227 |
| ENSP00000301280 | ENSP00000302896 |
| ENSP00000301280 | ENSP00000309606 |
| ENSP00000301280 | ENSP00000312697 |
| ENSP00000301280 | ENSP00000313059 |
| ENSP00000301280 | ENSP00000313420 |
| ENSP00000301280 | ENSP00000315700 |
| ENSP00000301280 | ENSP00000324122 |
| ENSP00000301280 | ENSP00000327077 |
| ENSP00000301280 | ENSP00000330343 |
| ENSP00000301280 | ENSP00000336868 |

|                 |                 |
|-----------------|-----------------|
| ENSP00000301280 | ENSP00000347232 |
| ENSP00000301280 | ENSP00000350767 |
| ENSP00000301280 | ENSP00000352257 |
| ENSP00000301280 | ENSP00000357965 |
| ENSP00000301280 | ENSP00000362592 |
| ENSP00000301280 | ENSP00000366974 |
| ENSP00000301280 | ENSP00000368438 |
| ENSP00000301280 | ENSP00000379607 |
| ENSP00000301280 | ENSP00000384026 |
| ENSP00000301280 | ENSP00000384490 |
| ENSP00000301281 | ENSP00000309031 |
| ENSP00000301281 | ENSP00000321617 |
| ENSP00000301281 | ENSP00000366395 |
| ENSP00000301281 | ENSP00000375881 |
| ENSP00000301281 | ENSP00000379457 |
| ENSP00000301281 | ENSP00000380460 |
| ENSP00000301327 | ENSP00000346142 |
| ENSP00000301329 | ENSP00000304185 |
| ENSP00000301329 | ENSP00000307004 |
| ENSP00000301329 | ENSP00000311768 |
| ENSP00000301329 | ENSP00000318821 |
| ENSP00000301329 | ENSP00000326813 |
| ENSP00000301329 | ENSP00000340019 |
| ENSP00000301329 | ENSP00000349022 |
| ENSP00000301329 | ENSP00000356331 |
| ENSP00000301329 | ENSP00000357440 |
| ENSP00000301329 | ENSP00000358854 |
| ENSP00000301329 | ENSP00000359444 |
| ENSP00000301329 | ENSP00000360286 |
| ENSP00000301329 | ENSP00000362094 |
| ENSP00000301329 | ENSP00000373509 |
| ENSP00000301329 | ENSP00000386227 |
| ENSP00000301332 | ENSP00000302530 |
| ENSP00000301332 | ENSP00000307684 |
| ENSP00000301332 | ENSP00000341848 |
| ENSP00000301332 | ENSP00000346566 |
| ENSP00000301332 | ENSP00000347719 |
| ENSP00000301332 | ENSP00000348573 |
| ENSP00000301332 | ENSP00000348965 |
| ENSP00000301332 | ENSP00000352572 |
| ENSP00000301332 | ENSP00000354486 |
| ENSP00000301332 | ENSP00000355922 |
| ENSP00000301332 | ENSP00000374566 |
| ENSP00000301332 | ENSP00000377793 |
| ENSP00000301332 | ENSP00000382562 |
| ENSP00000301332 | ENSP00000383145 |

|                 |                 |
|-----------------|-----------------|
| ENSP00000301332 | ENSP00000414402 |
| ENSP00000301335 | ENSP00000352522 |
| ENSP00000301336 | ENSP00000321239 |
| ENSP00000301364 | ENSP00000302768 |
| ENSP00000301364 | ENSP00000302896 |
| ENSP00000301364 | ENSP00000306682 |
| ENSP00000301364 | ENSP00000308897 |
| ENSP00000301364 | ENSP00000309433 |
| ENSP00000301364 | ENSP00000312411 |
| ENSP00000301364 | ENSP00000315674 |
| ENSP00000301364 | ENSP00000316879 |
| ENSP00000301364 | ENSP00000320917 |
| ENSP00000301364 | ENSP00000326981 |
| ENSP00000301364 | ENSP00000329466 |
| ENSP00000301364 | ENSP00000330343 |
| ENSP00000301364 | ENSP00000331817 |
| ENSP00000301364 | ENSP00000334836 |
| ENSP00000301364 | ENSP00000338573 |
| ENSP00000301364 | ENSP00000338862 |
| ENSP00000301364 | ENSP00000339095 |
| ENSP00000301364 | ENSP00000340281 |
| ENSP00000301364 | ENSP00000342381 |
| ENSP00000301364 | ENSP00000345917 |
| ENSP00000301364 | ENSP00000347087 |
| ENSP00000301364 | ENSP00000354125 |
| ENSP00000301364 | ENSP00000354739 |
| ENSP00000301364 | ENSP00000355471 |
| ENSP00000301364 | ENSP00000356134 |
| ENSP00000301364 | ENSP00000356548 |
| ENSP00000301364 | ENSP00000356591 |
| ENSP00000301364 | ENSP00000358605 |
| ENSP00000301364 | ENSP00000360031 |
| ENSP00000301364 | ENSP00000361949 |
| ENSP00000301364 | ENSP00000362153 |
| ENSP00000301364 | ENSP00000362744 |
| ENSP00000301364 | ENSP00000363642 |
| ENSP00000301364 | ENSP00000363708 |
| ENSP00000301364 | ENSP00000364126 |
| ENSP00000301364 | ENSP00000364293 |
| ENSP00000301364 | ENSP00000365806 |
| ENSP00000301364 | ENSP00000368589 |
| ENSP00000301364 | ENSP00000369757 |
| ENSP00000301364 | ENSP00000373090 |
| ENSP00000301364 | ENSP00000373702 |
| ENSP00000301364 | ENSP00000378529 |
| ENSP00000301364 | ENSP00000379888 |

|                 |                 |
|-----------------|-----------------|
| ENSP00000301364 | ENSP00000386456 |
| ENSP00000301364 | ENSP00000394290 |
| ENSP00000301364 | ENSP00000403576 |
| ENSP00000301364 | ENSP00000409074 |
| ENSP00000301364 | ENSP00000409367 |
| ENSP00000301364 | ENSP00000411162 |
| ENSP00000301364 | ENSP00000414321 |
| ENSP00000301364 | ENSP00000417229 |
| ENSP00000301364 | ENSP00000420588 |
| ENSP00000301455 | ENSP00000341189 |
| ENSP00000301459 | ENSP00000339826 |
| ENSP00000301459 | ENSP00000355013 |
| ENSP00000301463 | ENSP00000302830 |
| ENSP00000301463 | ENSP00000320623 |
| ENSP00000301463 | ENSP00000351221 |
| ENSP00000301488 | ENSP00000347495 |
| ENSP00000301488 | ENSP00000384179 |
| ENSP00000301585 | ENSP00000301587 |
| ENSP00000301585 | ENSP00000301729 |
| ENSP00000301585 | ENSP00000302160 |
| ENSP00000301585 | ENSP00000302896 |
| ENSP00000301585 | ENSP00000304311 |
| ENSP00000301585 | ENSP00000305653 |
| ENSP00000301585 | ENSP00000305682 |
| ENSP00000301585 | ENSP00000305696 |
| ENSP00000301585 | ENSP00000306080 |
| ENSP00000301585 | ENSP00000306548 |
| ENSP00000301585 | ENSP00000306574 |
| ENSP00000301585 | ENSP00000307889 |
| ENSP00000301585 | ENSP00000308275 |
| ENSP00000301585 | ENSP00000308717 |
| ENSP00000301585 | ENSP00000308897 |
| ENSP00000301585 | ENSP00000309595 |
| ENSP00000301585 | ENSP00000310785 |
| ENSP00000301585 | ENSP00000310933 |
| ENSP00000301585 | ENSP00000310951 |
| ENSP00000301585 | ENSP00000311368 |
| ENSP00000301585 | ENSP00000311766 |
| ENSP00000301585 | ENSP00000312311 |
| ENSP00000301585 | ENSP00000312356 |
| ENSP00000301585 | ENSP00000315017 |
| ENSP00000301585 | ENSP00000315397 |
| ENSP00000301585 | ENSP00000315774 |
| ENSP00000301585 | ENSP00000317376 |
| ENSP00000301585 | ENSP00000318158 |
| ENSP00000301585 | ENSP00000318646 |

|                 |                 |
|-----------------|-----------------|
| ENSP00000301585 | ENSP00000319501 |
| ENSP00000301585 | ENSP00000320184 |
| ENSP00000301585 | ENSP00000320658 |
| ENSP00000301585 | ENSP00000321503 |
| ENSP00000301585 | ENSP00000322450 |
| ENSP00000301585 | ENSP00000323065 |
| ENSP00000301585 | ENSP00000323076 |
| ENSP00000301585 | ENSP00000324100 |
| ENSP00000301585 | ENSP00000325448 |
| ENSP00000301585 | ENSP00000326981 |
| ENSP00000301585 | ENSP00000331849 |
| ENSP00000301585 | ENSP00000332340 |
| ENSP00000301585 | ENSP00000333401 |
| ENSP00000301585 | ENSP00000333667 |
| ENSP00000301585 | ENSP00000333837 |
| ENSP00000301585 | ENSP00000337358 |
| ENSP00000301585 | ENSP00000338799 |
| ENSP00000301585 | ENSP00000339844 |
| ENSP00000301585 | ENSP00000340019 |
| ENSP00000301585 | ENSP00000341082 |
| ENSP00000301585 | ENSP00000341692 |
| ENSP00000301585 | ENSP00000342502 |
| ENSP00000301585 | ENSP00000343657 |
| ENSP00000301585 | ENSP00000343741 |
| ENSP00000301585 | ENSP00000347581 |
| ENSP00000301585 | ENSP00000348886 |
| ENSP00000301585 | ENSP00000349142 |
| ENSP00000301585 | ENSP00000352678 |
| ENSP00000301585 | ENSP00000353826 |
| ENSP00000301585 | ENSP00000354086 |
| ENSP00000301585 | ENSP00000354522 |
| ENSP00000301585 | ENSP00000354525 |
| ENSP00000301585 | ENSP00000354580 |
| ENSP00000301585 | ENSP00000354876 |
| ENSP00000301585 | ENSP00000355692 |
| ENSP00000301585 | ENSP00000355739 |
| ENSP00000301585 | ENSP00000356001 |
| ENSP00000301585 | ENSP00000356134 |
| ENSP00000301585 | ENSP00000356972 |
| ENSP00000301585 | ENSP00000357823 |
| ENSP00000301585 | ENSP00000358737 |
| ENSP00000301585 | ENSP00000360268 |
| ENSP00000301585 | ENSP00000360327 |
| ENSP00000301585 | ENSP00000360498 |
| ENSP00000301585 | ENSP00000360777 |
| ENSP00000301585 | ENSP00000360782 |



|                 |                 |
|-----------------|-----------------|
| ENSP00000301585 | ENSP00000361084 |
| ENSP00000301585 | ENSP00000361206 |
| ENSP00000301585 | ENSP00000361923 |
| ENSP00000301585 | ENSP00000361982 |
| ENSP00000301585 | ENSP00000362036 |
| ENSP00000301585 | ENSP00000362144 |
| ENSP00000301585 | ENSP00000362208 |
| ENSP00000301585 | ENSP00000362608 |
| ENSP00000301585 | ENSP00000363999 |
| ENSP00000301585 | ENSP00000365534 |
| ENSP00000301585 | ENSP00000365837 |
| ENSP00000301585 | ENSP00000367923 |
| ENSP00000301585 | ENSP00000368389 |
| ENSP00000301585 | ENSP00000368605 |
| ENSP00000301585 | ENSP00000368646 |
| ENSP00000301585 | ENSP00000369682 |
| ENSP00000301585 | ENSP00000370023 |
| ENSP00000301585 | ENSP00000370737 |
| ENSP00000301585 | ENSP00000370930 |
| ENSP00000301585 | ENSP00000371634 |
| ENSP00000301585 | ENSP00000372445 |
| ENSP00000301585 | ENSP00000373331 |
| ENSP00000301585 | ENSP00000373404 |
| ENSP00000301585 | ENSP00000377040 |
| ENSP00000301585 | ENSP00000377486 |
| ENSP00000301585 | ENSP00000380531 |
| ENSP00000301585 | ENSP00000382250 |
| ENSP00000301585 | ENSP00000386227 |
| ENSP00000301585 | ENSP00000388658 |
| ENSP00000301585 | ENSP00000392601 |
| ENSP00000301585 | ENSP00000393241 |
| ENSP00000301585 | ENSP00000393953 |
| ENSP00000301585 | ENSP00000397790 |
| ENSP00000301585 | ENSP00000398494 |
| ENSP00000301585 | ENSP00000400513 |
| ENSP00000301585 | ENSP00000403175 |
| ENSP00000301585 | ENSP00000412583 |
| ENSP00000301585 | ENSP00000416110 |
| ENSP00000301585 | ENSP00000417602 |
| ENSP00000301585 | ENSP00000419370 |
| ENSP00000301585 | ENSP00000419740 |
| ENSP00000301585 | ENSP00000420588 |
| ENSP00000301585 | ENSP00000420714 |
| ENSP00000301587 | ENSP00000306003 |
| ENSP00000301587 | ENSP00000348886 |
| ENSP00000301587 | ENSP00000349142 |

|                 |                 |
|-----------------|-----------------|
| ENSP00000301587 | ENSP00000353826 |
| ENSP00000301587 | ENSP00000354632 |
| ENSP00000301587 | ENSP00000356329 |
| ENSP00000301587 | ENSP00000358737 |
| ENSP00000301587 | ENSP00000367934 |
| ENSP00000301587 | ENSP00000370414 |
| ENSP00000301587 | ENSP00000387262 |
| ENSP00000301587 | ENSP00000389649 |
| ENSP00000301587 | ENSP00000389934 |
| ENSP00000301607 | ENSP00000357731 |
| ENSP00000301607 | ENSP00000357753 |
| ENSP00000301634 | ENSP00000304102 |
| ENSP00000301634 | ENSP00000378529 |
| ENSP00000301727 | ENSP00000313420 |
| ENSP00000301727 | ENSP00000343741 |
| ENSP00000301727 | ENSP00000355153 |
| ENSP00000301727 | ENSP00000358404 |
| ENSP00000301729 | ENSP00000317376 |
| ENSP00000301729 | ENSP00000325136 |
| ENSP00000301729 | ENSP00000326981 |
| ENSP00000301729 | ENSP00000327070 |
| ENSP00000301729 | ENSP00000337127 |
| ENSP00000301729 | ENSP00000339479 |
| ENSP00000301729 | ENSP00000349016 |
| ENSP00000301729 | ENSP00000350249 |
| ENSP00000301729 | ENSP00000362036 |
| ENSP00000301729 | ENSP00000362413 |
| ENSP00000301729 | ENSP00000368438 |
| ENSP00000301729 | ENSP00000368605 |
| ENSP00000301729 | ENSP00000368755 |
| ENSP00000301729 | ENSP00000372445 |
| ENSP00000301729 | ENSP00000392330 |
| ENSP00000301740 | ENSP00000301962 |
| ENSP00000301740 | ENSP00000302160 |
| ENSP00000301740 | ENSP00000303191 |
| ENSP00000301740 | ENSP00000304350 |
| ENSP00000301740 | ENSP00000304370 |
| ENSP00000301740 | ENSP00000305790 |
| ENSP00000301740 | ENSP00000307863 |
| ENSP00000301740 | ENSP00000310040 |
| ENSP00000301740 | ENSP00000310448 |
| ENSP00000301740 | ENSP00000315859 |
| ENSP00000301740 | ENSP00000318861 |
| ENSP00000301740 | ENSP00000320184 |
| ENSP00000301740 | ENSP00000322016 |
| ENSP00000301740 | ENSP00000323856 |

|                 |                 |
|-----------------|-----------------|
| ENSP00000301740 | ENSP00000325376 |
| ENSP00000301740 | ENSP00000326261 |
| ENSP00000301740 | ENSP00000326806 |
| ENSP00000301740 | ENSP00000329466 |
| ENSP00000301740 | ENSP00000331907 |
| ENSP00000301740 | ENSP00000332103 |
| ENSP00000301740 | ENSP00000333837 |
| ENSP00000301740 | ENSP00000334148 |
| ENSP00000301740 | ENSP00000336752 |
| ENSP00000301740 | ENSP00000337839 |
| ENSP00000301740 | ENSP00000339090 |
| ENSP00000301740 | ENSP00000339095 |
| ENSP00000301740 | ENSP00000340019 |
| ENSP00000301740 | ENSP00000341885 |
| ENSP00000301740 | ENSP00000342374 |
| ENSP00000301740 | ENSP00000343557 |
| ENSP00000301740 | ENSP00000346050 |
| ENSP00000301740 | ENSP00000346120 |
| ENSP00000301740 | ENSP00000349124 |
| ENSP00000301740 | ENSP00000349748 |
| ENSP00000301740 | ENSP00000352257 |
| ENSP00000301740 | ENSP00000354125 |
| ENSP00000301740 | ENSP00000356541 |
| ENSP00000301740 | ENSP00000357283 |
| ENSP00000301740 | ENSP00000357863 |
| ENSP00000301740 | ENSP00000358242 |
| ENSP00000301740 | ENSP00000358554 |
| ENSP00000301740 | ENSP00000359727 |
| ENSP00000301740 | ENSP00000360147 |
| ENSP00000301740 | ENSP00000360532 |
| ENSP00000301740 | ENSP00000361076 |
| ENSP00000301740 | ENSP00000362110 |
| ENSP00000301740 | ENSP00000362546 |
| ENSP00000301740 | ENSP00000362592 |
| ENSP00000301740 | ENSP00000362688 |
| ENSP00000301740 | ENSP00000362900 |
| ENSP00000301740 | ENSP00000363591 |
| ENSP00000301740 | ENSP00000364289 |
| ENSP00000301740 | ENSP00000366557 |
| ENSP00000301740 | ENSP00000374213 |
| ENSP00000301740 | ENSP00000374455 |
| ENSP00000301740 | ENSP00000376973 |
| ENSP00000301740 | ENSP00000379607 |
| ENSP00000301740 | ENSP00000380921 |
| ENSP00000301740 | ENSP00000382250 |
| ENSP00000301740 | ENSP00000391249 |

|                 |                 |
|-----------------|-----------------|
| ENSP00000301740 | ENSP00000391944 |
| ENSP00000301740 | ENSP00000410758 |
| ENSP00000301740 | ENSP00000412566 |
| ENSP00000301761 | ENSP00000387262 |
| ENSP00000301764 | ENSP00000302160 |
| ENSP00000301764 | ENSP00000303191 |
| ENSP00000301764 | ENSP00000304102 |
| ENSP00000301764 | ENSP00000304350 |
| ENSP00000301764 | ENSP00000304370 |
| ENSP00000301764 | ENSP00000307305 |
| ENSP00000301764 | ENSP00000308620 |
| ENSP00000301764 | ENSP00000310448 |
| ENSP00000301764 | ENSP00000311513 |
| ENSP00000301764 | ENSP00000311825 |
| ENSP00000301764 | ENSP00000311873 |
| ENSP00000301764 | ENSP00000313034 |
| ENSP00000301764 | ENSP00000313420 |
| ENSP00000301764 | ENSP00000314949 |
| ENSP00000301764 | ENSP00000315379 |
| ENSP00000301764 | ENSP00000318313 |
| ENSP00000301764 | ENSP00000324122 |
| ENSP00000301764 | ENSP00000326531 |
| ENSP00000301764 | ENSP00000326806 |
| ENSP00000301764 | ENSP00000329466 |
| ENSP00000301764 | ENSP00000330753 |
| ENSP00000301764 | ENSP00000331817 |
| ENSP00000301764 | ENSP00000332995 |
| ENSP00000301764 | ENSP00000333537 |
| ENSP00000301764 | ENSP00000333667 |
| ENSP00000301764 | ENSP00000335321 |
| ENSP00000301764 | ENSP00000336868 |
| ENSP00000301764 | ENSP00000337340 |
| ENSP00000301764 | ENSP00000337405 |
| ENSP00000301764 | ENSP00000337797 |
| ENSP00000301764 | ENSP00000338413 |
| ENSP00000301764 | ENSP00000339090 |
| ENSP00000301764 | ENSP00000341351 |
| ENSP00000301764 | ENSP00000342262 |
| ENSP00000301764 | ENSP00000342374 |
| ENSP00000301764 | ENSP00000343741 |
| ENSP00000301764 | ENSP00000343745 |
| ENSP00000301764 | ENSP00000344456 |
| ENSP00000301764 | ENSP00000344666 |
| ENSP00000301764 | ENSP00000345096 |
| ENSP00000301764 | ENSP00000346340 |
| ENSP00000301764 | ENSP00000347168 |

|                 |                 |
|-----------------|-----------------|
| ENSP00000301764 | ENSP00000347978 |
| ENSP00000301764 | ENSP00000348010 |
| ENSP00000301764 | ENSP00000348089 |
| ENSP00000301764 | ENSP00000350512 |
| ENSP00000301764 | ENSP00000350767 |
| ENSP00000301764 | ENSP00000351100 |
| ENSP00000301764 | ENSP00000351137 |
| ENSP00000301764 | ENSP00000351697 |
| ENSP00000301764 | ENSP00000352121 |
| ENSP00000301764 | ENSP00000352257 |
| ENSP00000301764 | ENSP00000352516 |
| ENSP00000301764 | ENSP00000352928 |
| ENSP00000301764 | ENSP00000354501 |
| ENSP00000301764 | ENSP00000354558 |
| ENSP00000301764 | ENSP00000354723 |
| ENSP00000301764 | ENSP00000355205 |
| ENSP00000301764 | ENSP00000355317 |
| ENSP00000301764 | ENSP00000355388 |
| ENSP00000301764 | ENSP00000355958 |
| ENSP00000301764 | ENSP00000356541 |
| ENSP00000301764 | ENSP00000356641 |
| ENSP00000301764 | ENSP00000356817 |
| ENSP00000301764 | ENSP00000357048 |
| ENSP00000301764 | ENSP00000357631 |
| ENSP00000301764 | ENSP00000357651 |
| ENSP00000301764 | ENSP00000358417 |
| ENSP00000301764 | ENSP00000359206 |
| ENSP00000301764 | ENSP00000360515 |
| ENSP00000301764 | ENSP00000360532 |
| ENSP00000301764 | ENSP00000360817 |
| ENSP00000301764 | ENSP00000362110 |
| ENSP00000301764 | ENSP00000362592 |
| ENSP00000301764 | ENSP00000362688 |
| ENSP00000301764 | ENSP00000362936 |
| ENSP00000301764 | ENSP00000363313 |
| ENSP00000301764 | ENSP00000364289 |
| ENSP00000301764 | ENSP00000364404 |
| ENSP00000301764 | ENSP00000365877 |
| ENSP00000301764 | ENSP00000366271 |
| ENSP00000301764 | ENSP00000366557 |
| ENSP00000301764 | ENSP00000366953 |
| ENSP00000301764 | ENSP00000366974 |
| ENSP00000301764 | ENSP00000367034 |
| ENSP00000301764 | ENSP00000368438 |
| ENSP00000301764 | ENSP00000368887 |
| ENSP00000301764 | ENSP00000371682 |

|                 |                 |
|-----------------|-----------------|
| ENSP00000301764 | ENSP00000372023 |
| ENSP00000301764 | ENSP00000373354 |
| ENSP00000301764 | ENSP00000379607 |
| ENSP00000301764 | ENSP00000380718 |
| ENSP00000301764 | ENSP00000384109 |
| ENSP00000301764 | ENSP00000387006 |
| ENSP00000301764 | ENSP00000397435 |
| ENSP00000301764 | ENSP00000400591 |
| ENSP00000301764 | ENSP00000408994 |
| ENSP00000301764 | ENSP00000415434 |
| ENSP00000301764 | ENSP00000417980 |
| ENSP00000301765 | ENSP00000307387 |
| ENSP00000301765 | ENSP00000310440 |
| ENSP00000301765 | ENSP00000318629 |
| ENSP00000301765 | ENSP00000331201 |
| ENSP00000301765 | ENSP00000356903 |
| ENSP00000301765 | ENSP00000360540 |
| ENSP00000301765 | ENSP00000366565 |
| ENSP00000301788 | ENSP00000306906 |
| ENSP00000301788 | ENSP00000306983 |
| ENSP00000301788 | ENSP00000307491 |
| ENSP00000301788 | ENSP00000307850 |
| ENSP00000301788 | ENSP00000310260 |
| ENSP00000301788 | ENSP00000312735 |
| ENSP00000301788 | ENSP00000314949 |
| ENSP00000301788 | ENSP00000317636 |
| ENSP00000301788 | ENSP00000318641 |
| ENSP00000301788 | ENSP00000322608 |
| ENSP00000301788 | ENSP00000323720 |
| ENSP00000301788 | ENSP00000323858 |
| ENSP00000301788 | ENSP00000324124 |
| ENSP00000301788 | ENSP00000326767 |
| ENSP00000301788 | ENSP00000327889 |
| ENSP00000301788 | ENSP00000329029 |
| ENSP00000301788 | ENSP00000331111 |
| ENSP00000301788 | ENSP00000333376 |
| ENSP00000301788 | ENSP00000337340 |
| ENSP00000301788 | ENSP00000340823 |
| ENSP00000301788 | ENSP00000342889 |
| ENSP00000301788 | ENSP00000345530 |
| ENSP00000301788 | ENSP00000347883 |
| ENSP00000301788 | ENSP00000354720 |
| ENSP00000301788 | ENSP00000356146 |
| ENSP00000301788 | ENSP00000358081 |
| ENSP00000301788 | ENSP00000358497 |
| ENSP00000301788 | ENSP00000359290 |

|                 |                 |
|-----------------|-----------------|
| ENSP00000301788 | ENSP00000359531 |
| ENSP00000301788 | ENSP00000364320 |
| ENSP00000301788 | ENSP00000364482 |
| ENSP00000301788 | ENSP00000364813 |
| ENSP00000301788 | ENSP00000366828 |
| ENSP00000301788 | ENSP00000369695 |
| ENSP00000301788 | ENSP00000370258 |
| ENSP00000301788 | ENSP00000372817 |
| ENSP00000301788 | ENSP00000372883 |
| ENSP00000301788 | ENSP00000377969 |
| ENSP00000301788 | ENSP00000379228 |
| ENSP00000301788 | ENSP00000381031 |
| ENSP00000301788 | ENSP00000383503 |
| ENSP00000301788 | ENSP00000386759 |
| ENSP00000301788 | ENSP00000391798 |
| ENSP00000301788 | ENSP00000397636 |
| ENSP00000301788 | ENSP00000403345 |
| ENSP00000301788 | ENSP00000403852 |
| ENSP00000301788 | ENSP00000405636 |
| ENSP00000301788 | ENSP00000406280 |
| ENSP00000301788 | ENSP00000406293 |
| ENSP00000301788 | ENSP00000410530 |
| ENSP00000301788 | ENSP00000410954 |
| ENSP00000301788 | ENSP00000414006 |
| ENSP00000301788 | ENSP00000414110 |
| ENSP00000301788 | ENSP00000414634 |
| ENSP00000301788 | ENSP00000416599 |
| ENSP00000301825 | ENSP00000352522 |
| ENSP00000301825 | ENSP00000365840 |
| ENSP00000301831 | ENSP00000332353 |
| ENSP00000301831 | ENSP00000334061 |
| ENSP00000301831 | ENSP00000340954 |
| ENSP00000301838 | ENSP00000304226 |
| ENSP00000301838 | ENSP00000313829 |
| ENSP00000301838 | ENSP00000318822 |
| ENSP00000301838 | ENSP00000326340 |
| ENSP00000301838 | ENSP00000329411 |
| ENSP00000301838 | ENSP00000337797 |
| ENSP00000301838 | ENSP00000340278 |
| ENSP00000301838 | ENSP00000341268 |
| ENSP00000301838 | ENSP00000341692 |
| ENSP00000301838 | ENSP00000343313 |
| ENSP00000301838 | ENSP00000347979 |
| ENSP00000301838 | ENSP00000350785 |
| ENSP00000301838 | ENSP00000353538 |
| ENSP00000301838 | ENSP00000353660 |

|                 |                 |
|-----------------|-----------------|
| ENSP00000301838 | ENSP00000356694 |
| ENSP00000301838 | ENSP00000358997 |
| ENSP00000301838 | ENSP00000361120 |
| ENSP00000301838 | ENSP00000379457 |
| ENSP00000301838 | ENSP00000394794 |
| ENSP00000301838 | ENSP00000401980 |
| ENSP00000301838 | ENSP00000403817 |
| ENSP00000301838 | ENSP00000419494 |
| ENSP00000301843 | ENSP00000307134 |
| ENSP00000301843 | ENSP00000314499 |
| ENSP00000301843 | ENSP00000316460 |
| ENSP00000301843 | ENSP00000322804 |
| ENSP00000301843 | ENSP00000326238 |
| ENSP00000301843 | ENSP00000329002 |
| ENSP00000301843 | ENSP00000334061 |
| ENSP00000301843 | ENSP00000334836 |
| ENSP00000301843 | ENSP00000341189 |
| ENSP00000301843 | ENSP00000344468 |
| ENSP00000301843 | ENSP00000348128 |
| ENSP00000301843 | ENSP00000348163 |
| ENSP00000301843 | ENSP00000348215 |
| ENSP00000301843 | ENSP00000348602 |
| ENSP00000301843 | ENSP00000349016 |
| ENSP00000301843 | ENSP00000350297 |
| ENSP00000301843 | ENSP00000352802 |
| ENSP00000301843 | ENSP00000353452 |
| ENSP00000301843 | ENSP00000359206 |
| ENSP00000301843 | ENSP00000359225 |
| ENSP00000301843 | ENSP00000360798 |
| ENSP00000301843 | ENSP00000364277 |
| ENSP00000301843 | ENSP00000364898 |
| ENSP00000301843 | ENSP00000366603 |
| ENSP00000301843 | ENSP00000374424 |
| ENSP00000301843 | ENSP00000377496 |
| ENSP00000301843 | ENSP00000379607 |
| ENSP00000301843 | ENSP00000380431 |
| ENSP00000301843 | ENSP00000386456 |
| ENSP00000301843 | ENSP00000401277 |
| ENSP00000301887 | ENSP00000303315 |
| ENSP00000301887 | ENSP00000345107 |
| ENSP00000301887 | ENSP00000358854 |
| ENSP00000301920 | ENSP00000355536 |
| ENSP00000301945 | ENSP00000350283 |
| ENSP00000301962 | ENSP00000303191 |
| ENSP00000301962 | ENSP00000315397 |
| ENSP00000301962 | ENSP00000321449 |



|                 |                 |
|-----------------|-----------------|
| ENSP00000301962 | ENSP00000339795 |
| ENSP00000301962 | ENSP00000358563 |
| ENSP00000301962 | ENSP00000359000 |
| ENSP00000301962 | ENSP00000361027 |
| ENSP00000301962 | ENSP00000363642 |
| ENSP00000301962 | ENSP00000363746 |
| ENSP00000301962 | ENSP00000364037 |
| ENSP00000301962 | ENSP00000367029 |
| ENSP00000301962 | ENSP00000367498 |
| ENSP00000301962 | ENSP00000368438 |
| ENSP00000301962 | ENSP00000369682 |
| ENSP00000301962 | ENSP00000372326 |
| ENSP00000301962 | ENSP00000372695 |
| ENSP00000301962 | ENSP00000380460 |
| ENSP00000301962 | ENSP00000380531 |
| ENSP00000301962 | ENSP00000384211 |
| ENSP00000301962 | ENSP00000399454 |
| ENSP00000301962 | ENSP00000402869 |
| ENSP00000301962 | ENSP00000405614 |
| ENSP00000301962 | ENSP00000417281 |
| ENSP00000301962 | ENSP00000420714 |
| ENSP00000301972 | ENSP00000339191 |
| ENSP00000302021 | ENSP00000359100 |
| ENSP00000302079 | ENSP00000360916 |
| ENSP00000302079 | ENSP00000396688 |
| ENSP00000302108 | ENSP00000340879 |
| ENSP00000302111 | ENSP00000305230 |
| ENSP00000302111 | ENSP00000313420 |
| ENSP00000302111 | ENSP00000318195 |
| ENSP00000302111 | ENSP00000318646 |
| ENSP00000302111 | ENSP00000318977 |
| ENSP00000302111 | ENSP00000328111 |
| ENSP00000302111 | ENSP00000328690 |
| ENSP00000302111 | ENSP00000334675 |
| ENSP00000302111 | ENSP00000338413 |
| ENSP00000302111 | ENSP00000346037 |
| ENSP00000302111 | ENSP00000346240 |
| ENSP00000302111 | ENSP00000347978 |
| ENSP00000302111 | ENSP00000348089 |
| ENSP00000302111 | ENSP00000350708 |
| ENSP00000302111 | ENSP00000352257 |
| ENSP00000302111 | ENSP00000354522 |
| ENSP00000302111 | ENSP00000360621 |
| ENSP00000302111 | ENSP00000361990 |
| ENSP00000302111 | ENSP00000362578 |
| ENSP00000302111 | ENSP00000363313 |

|                 |                 |
|-----------------|-----------------|
| ENSP00000302111 | ENSP00000364270 |
| ENSP00000302111 | ENSP00000368438 |
| ENSP00000302111 | ENSP00000369325 |
| ENSP00000302111 | ENSP00000369497 |
| ENSP00000302111 | ENSP00000371475 |
| ENSP00000302111 | ENSP00000372023 |
| ENSP00000302111 | ENSP00000381045 |
| ENSP00000302111 | ENSP00000381863 |
| ENSP00000302111 | ENSP00000386161 |
| ENSP00000302111 | ENSP00000396068 |
| ENSP00000302114 | ENSP00000319323 |
| ENSP00000302114 | ENSP00000320309 |
| ENSP00000302114 | ENSP00000325448 |
| ENSP00000302114 | ENSP00000335675 |
| ENSP00000302114 | ENSP00000348886 |
| ENSP00000302114 | ENSP00000356329 |
| ENSP00000302114 | ENSP00000356587 |
| ENSP00000302114 | ENSP00000362298 |
| ENSP00000302114 | ENSP00000367498 |
| ENSP00000302114 | ENSP00000368140 |
| ENSP00000302114 | ENSP00000369860 |
| ENSP00000302120 | ENSP00000306906 |
| ENSP00000302120 | ENSP00000311827 |
| ENSP00000302120 | ENSP00000313881 |
| ENSP00000302120 | ENSP00000321239 |
| ENSP00000302120 | ENSP00000340305 |
| ENSP00000302120 | ENSP00000342755 |
| ENSP00000302120 | ENSP00000343535 |
| ENSP00000302120 | ENSP00000349783 |
| ENSP00000302120 | ENSP00000360497 |
| ENSP00000302120 | ENSP00000370719 |
| ENSP00000302139 | ENSP00000313059 |
| ENSP00000302139 | ENSP00000380921 |
| ENSP00000302160 | ENSP00000304350 |
| ENSP00000302160 | ENSP00000304593 |
| ENSP00000302160 | ENSP00000304903 |
| ENSP00000302160 | ENSP00000305790 |
| ENSP00000302160 | ENSP00000307387 |
| ENSP00000302160 | ENSP00000308546 |
| ENSP00000302160 | ENSP00000310448 |
| ENSP00000302160 | ENSP00000310596 |
| ENSP00000302160 | ENSP00000311430 |
| ENSP00000302160 | ENSP00000314311 |
| ENSP00000302160 | ENSP00000315035 |
| ENSP00000302160 | ENSP00000315379 |
| ENSP00000302160 | ENSP00000318861 |

|                 |                 |
|-----------------|-----------------|
| ENSP00000302160 | ENSP00000319341 |
| ENSP00000302160 | ENSP00000320503 |
| ENSP00000302160 | ENSP00000320949 |
| ENSP00000302160 | ENSP00000323302 |
| ENSP00000302160 | ENSP00000324122 |
| ENSP00000302160 | ENSP00000325448 |
| ENSP00000302160 | ENSP00000330836 |
| ENSP00000302160 | ENSP00000332103 |
| ENSP00000302160 | ENSP00000334188 |
| ENSP00000302160 | ENSP00000335321 |
| ENSP00000302160 | ENSP00000337405 |
| ENSP00000302160 | ENSP00000339090 |
| ENSP00000302160 | ENSP00000339095 |
| ENSP00000302160 | ENSP00000339503 |
| ENSP00000302160 | ENSP00000342374 |
| ENSP00000302160 | ENSP00000343081 |
| ENSP00000302160 | ENSP00000343742 |
| ENSP00000302160 | ENSP00000348010 |
| ENSP00000302160 | ENSP00000348107 |
| ENSP00000302160 | ENSP00000348722 |
| ENSP00000302160 | ENSP00000354673 |
| ENSP00000302160 | ENSP00000355205 |
| ENSP00000302160 | ENSP00000359454 |
| ENSP00000302160 | ENSP00000361577 |
| ENSP00000302160 | ENSP00000362110 |
| ENSP00000302160 | ENSP00000362413 |
| ENSP00000302160 | ENSP00000363313 |
| ENSP00000302160 | ENSP00000364320 |
| ENSP00000302160 | ENSP00000364649 |
| ENSP00000302160 | ENSP00000364813 |
| ENSP00000302160 | ENSP00000366135 |
| ENSP00000302160 | ENSP00000366557 |
| ENSP00000302160 | ENSP00000370119 |
| ENSP00000302160 | ENSP00000370589 |
| ENSP00000302160 | ENSP00000371546 |
| ENSP00000302160 | ENSP00000373715 |
| ENSP00000302160 | ENSP00000374213 |
| ENSP00000302160 | ENSP00000374529 |
| ENSP00000302160 | ENSP00000376973 |
| ENSP00000302160 | ENSP00000379607 |
| ENSP00000302160 | ENSP00000380251 |
| ENSP00000302160 | ENSP00000380969 |
| ENSP00000302160 | ENSP00000382779 |
| ENSP00000302160 | ENSP00000391723 |
| ENSP00000302160 | ENSP00000400591 |
| ENSP00000302160 | ENSP00000406293 |

|                 |                 |
|-----------------|-----------------|
| ENSP00000302160 | ENSP00000410758 |
| ENSP00000302160 | ENSP00000412566 |
| ENSP00000302160 | ENSP00000414006 |
| ENSP00000302160 | ENSP00000414634 |
| ENSP00000302160 | ENSP00000419628 |
| ENSP00000302176 | ENSP00000309031 |
| ENSP00000302176 | ENSP00000321617 |
| ENSP00000302176 | ENSP00000331487 |
| ENSP00000302176 | ENSP00000337688 |
| ENSP00000302176 | ENSP00000375881 |
| ENSP00000302176 | ENSP00000379457 |
| ENSP00000302176 | ENSP00000380460 |
| ENSP00000302177 | ENSP00000310551 |
| ENSP00000302177 | ENSP00000314036 |
| ENSP00000302177 | ENSP00000337463 |
| ENSP00000302177 | ENSP00000346228 |
| ENSP00000302177 | ENSP00000355963 |
| ENSP00000302177 | ENSP00000380184 |
| ENSP00000302177 | ENSP00000382723 |
| ENSP00000302177 | ENSP00000389516 |
| ENSP00000302177 | ENSP00000395863 |
| ENSP00000302177 | ENSP00000401287 |
| ENSP00000302177 | ENSP00000405864 |
| ENSP00000302177 | ENSP00000412805 |
| ENSP00000302216 | ENSP00000326391 |
| ENSP00000302216 | ENSP00000331057 |
| ENSP00000302216 | ENSP00000332353 |
| ENSP00000302216 | ENSP00000352514 |
| ENSP00000302216 | ENSP00000367972 |
| ENSP00000302216 | ENSP00000372170 |
| ENSP00000302239 | ENSP00000307387 |
| ENSP00000302239 | ENSP00000309595 |
| ENSP00000302239 | ENSP00000310440 |
| ENSP00000302239 | ENSP00000317468 |
| ENSP00000302239 | ENSP00000324491 |
| ENSP00000302239 | ENSP00000326921 |
| ENSP00000302239 | ENSP00000331201 |
| ENSP00000302239 | ENSP00000331487 |
| ENSP00000302239 | ENSP00000334061 |
| ENSP00000302239 | ENSP00000337353 |
| ENSP00000302239 | ENSP00000339186 |
| ENSP00000302239 | ENSP00000341679 |
| ENSP00000302239 | ENSP00000342026 |
| ENSP00000302239 | ENSP00000342755 |
| ENSP00000302239 | ENSP00000343479 |
| ENSP00000302239 | ENSP00000343535 |

|                 |                 |
|-----------------|-----------------|
| ENSP00000302239 | ENSP00000345530 |
| ENSP00000302239 | ENSP00000347498 |
| ENSP00000302239 | ENSP00000348442 |
| ENSP00000302239 | ENSP00000354522 |
| ENSP00000302239 | ENSP00000354673 |
| ENSP00000302239 | ENSP00000357047 |
| ENSP00000302239 | ENSP00000360798 |
| ENSP00000302239 | ENSP00000360916 |
| ENSP00000302239 | ENSP00000366746 |
| ENSP00000302239 | ENSP00000393596 |
| ENSP00000302239 | ENSP00000405963 |
| ENSP00000302239 | ENSP00000417686 |
| ENSP00000302327 | ENSP00000318374 |
| ENSP00000302327 | ENSP00000344456 |
| ENSP00000302327 | ENSP00000363193 |
| ENSP00000302478 | ENSP00000303088 |
| ENSP00000302478 | ENSP00000306983 |
| ENSP00000302478 | ENSP00000310966 |
| ENSP00000302478 | ENSP00000314949 |
| ENSP00000302478 | ENSP00000324124 |
| ENSP00000302478 | ENSP00000327070 |
| ENSP00000302478 | ENSP00000329002 |
| ENSP00000302478 | ENSP00000331111 |
| ENSP00000302478 | ENSP00000332171 |
| ENSP00000302478 | ENSP00000333837 |
| ENSP00000302478 | ENSP00000333920 |
| ENSP00000302478 | ENSP00000334564 |
| ENSP00000302478 | ENSP00000340671 |
| ENSP00000302478 | ENSP00000341243 |
| ENSP00000302478 | ENSP00000347345 |
| ENSP00000302478 | ENSP00000361465 |
| ENSP00000302478 | ENSP00000366828 |
| ENSP00000302478 | ENSP00000367029 |
| ENSP00000302478 | ENSP00000368686 |
| ENSP00000302478 | ENSP00000369695 |
| ENSP00000302478 | ENSP00000378736 |
| ENSP00000302478 | ENSP00000383503 |
| ENSP00000302478 | ENSP00000397636 |
| ENSP00000302478 | ENSP00000403852 |
| ENSP00000302478 | ENSP00000405636 |
| ENSP00000302478 | ENSP00000410530 |
| ENSP00000302478 | ENSP00000410954 |
| ENSP00000302478 | ENSP00000414110 |
| ENSP00000302478 | ENSP00000416599 |
| ENSP00000302501 | ENSP00000311825 |
| ENSP00000302501 | ENSP00000312385 |

|                 |                 |
|-----------------|-----------------|
| ENSP00000302501 | ENSP00000333633 |
| ENSP00000302501 | ENSP00000341551 |
| ENSP00000302501 | ENSP00000342828 |
| ENSP00000302501 | ENSP00000362592 |
| ENSP00000302501 | ENSP00000414187 |
| ENSP00000302530 | ENSP00000304593 |
| ENSP00000302530 | ENSP00000311873 |
| ENSP00000302530 | ENSP00000313171 |
| ENSP00000302530 | ENSP00000313243 |
| ENSP00000302530 | ENSP00000313420 |
| ENSP00000302530 | ENSP00000315791 |
| ENSP00000302530 | ENSP00000318977 |
| ENSP00000302530 | ENSP00000322180 |
| ENSP00000302530 | ENSP00000323439 |
| ENSP00000302530 | ENSP00000324729 |
| ENSP00000302530 | ENSP00000325377 |
| ENSP00000302530 | ENSP00000325863 |
| ENSP00000302530 | ENSP00000329933 |
| ENSP00000302530 | ENSP00000330408 |
| ENSP00000302530 | ENSP00000331310 |
| ENSP00000302530 | ENSP00000334188 |
| ENSP00000302530 | ENSP00000335463 |
| ENSP00000302530 | ENSP00000336842 |
| ENSP00000302530 | ENSP00000341382 |
| ENSP00000302530 | ENSP00000343526 |
| ENSP00000302530 | ENSP00000343535 |
| ENSP00000302530 | ENSP00000343741 |
| ENSP00000302530 | ENSP00000346566 |
| ENSP00000302530 | ENSP00000347076 |
| ENSP00000302530 | ENSP00000347168 |
| ENSP00000302530 | ENSP00000347719 |
| ENSP00000302530 | ENSP00000347978 |
| ENSP00000302530 | ENSP00000348010 |
| ENSP00000302530 | ENSP00000348128 |
| ENSP00000302530 | ENSP00000350199 |
| ENSP00000302530 | ENSP00000350767 |
| ENSP00000302530 | ENSP00000351284 |
| ENSP00000302530 | ENSP00000351665 |
| ENSP00000302530 | ENSP00000352121 |
| ENSP00000302530 | ENSP00000352572 |
| ENSP00000302530 | ENSP00000353332 |
| ENSP00000302530 | ENSP00000353793 |
| ENSP00000302530 | ENSP00000354522 |
| ENSP00000302530 | ENSP00000354558 |
| ENSP00000302530 | ENSP00000354720 |
| ENSP00000302530 | ENSP00000354957 |

|                 |                 |
|-----------------|-----------------|
| ENSP00000302530 | ENSP00000355205 |
| ENSP00000302530 | ENSP00000355388 |
| ENSP00000302530 | ENSP00000355560 |
| ENSP00000302530 | ENSP00000355922 |
| ENSP00000302530 | ENSP00000355944 |
| ENSP00000302530 | ENSP00000356319 |
| ENSP00000302530 | ENSP00000356989 |
| ENSP00000302530 | ENSP00000357260 |
| ENSP00000302530 | ENSP00000357440 |
| ENSP00000302530 | ENSP00000357651 |
| ENSP00000302530 | ENSP00000357887 |
| ENSP00000302530 | ENSP00000357907 |
| ENSP00000302530 | ENSP00000359518 |
| ENSP00000302530 | ENSP00000360286 |
| ENSP00000302530 | ENSP00000360473 |
| ENSP00000302530 | ENSP00000360532 |
| ENSP00000302530 | ENSP00000360621 |
| ENSP00000302530 | ENSP00000363055 |
| ENSP00000302530 | ENSP00000363779 |
| ENSP00000302530 | ENSP00000364119 |
| ENSP00000302530 | ENSP00000365025 |
| ENSP00000302530 | ENSP00000366974 |
| ENSP00000302530 | ENSP00000367034 |
| ENSP00000302530 | ENSP00000368438 |
| ENSP00000302530 | ENSP00000368976 |
| ENSP00000302530 | ENSP00000369411 |
| ENSP00000302530 | ENSP00000370151 |
| ENSP00000302530 | ENSP00000370557 |
| ENSP00000302530 | ENSP00000370589 |
| ENSP00000302530 | ENSP00000374213 |
| ENSP00000302530 | ENSP00000374566 |
| ENSP00000302530 | ENSP00000375809 |
| ENSP00000302530 | ENSP00000378165 |
| ENSP00000302530 | ENSP00000381932 |
| ENSP00000302530 | ENSP00000382177 |
| ENSP00000302530 | ENSP00000382271 |
| ENSP00000302530 | ENSP00000382562 |
| ENSP00000302530 | ENSP00000386759 |
| ENSP00000302530 | ENSP00000402084 |
| ENSP00000302530 | ENSP00000408910 |
| ENSP00000302579 | ENSP00000334003 |
| ENSP00000302579 | ENSP00000366121 |
| ENSP00000302620 | ENSP00000339435 |
| ENSP00000302620 | ENSP00000345282 |
| ENSP00000302620 | ENSP00000348234 |
| ENSP00000302620 | ENSP00000365534 |

|                 |                 |
|-----------------|-----------------|
| ENSP00000302620 | ENSP00000365773 |
| ENSP00000302620 | ENSP00000368066 |
| ENSP00000302620 | ENSP00000368109 |
| ENSP00000302620 | ENSP00000407401 |
| ENSP00000302640 | ENSP00000310966 |
| ENSP00000302640 | ENSP00000314971 |
| ENSP00000302640 | ENSP00000319104 |
| ENSP00000302640 | ENSP00000321636 |
| ENSP00000302640 | ENSP00000327072 |
| ENSP00000302640 | ENSP00000329029 |
| ENSP00000302640 | ENSP00000329466 |
| ENSP00000302640 | ENSP00000336842 |
| ENSP00000302640 | ENSP00000337340 |
| ENSP00000302640 | ENSP00000349640 |
| ENSP00000302640 | ENSP00000350894 |
| ENSP00000302640 | ENSP00000352257 |
| ENSP00000302640 | ENSP00000352514 |
| ENSP00000302640 | ENSP00000353622 |
| ENSP00000302640 | ENSP00000359531 |
| ENSP00000302640 | ENSP00000365016 |
| ENSP00000302640 | ENSP00000367029 |
| ENSP00000302640 | ENSP00000369757 |
| ENSP00000302640 | ENSP00000370968 |
| ENSP00000302640 | ENSP00000382562 |
| ENSP00000302640 | ENSP00000398930 |
| ENSP00000302640 | ENSP00000401371 |
| ENSP00000302640 | ENSP00000406888 |
| ENSP00000302648 | ENSP00000347942 |
| ENSP00000302648 | ENSP00000393725 |
| ENSP00000302665 | ENSP00000355010 |
| ENSP00000302665 | ENSP00000387170 |
| ENSP00000302768 | ENSP00000307863 |
| ENSP00000302768 | ENSP00000312753 |
| ENSP00000302768 | ENSP00000315859 |
| ENSP00000302768 | ENSP00000317872 |
| ENSP00000302768 | ENSP00000318646 |
| ENSP00000302768 | ENSP00000322570 |
| ENSP00000302768 | ENSP00000323858 |
| ENSP00000302768 | ENSP00000329715 |
| ENSP00000302768 | ENSP00000331817 |
| ENSP00000302768 | ENSP00000338862 |
| ENSP00000302768 | ENSP00000343081 |
| ENSP00000302768 | ENSP00000346453 |
| ENSP00000302768 | ENSP00000348722 |
| ENSP00000302768 | ENSP00000354522 |
| ENSP00000302768 | ENSP00000355890 |



|                 |                 |
|-----------------|-----------------|
| ENSP00000302768 | ENSP00000356146 |
| ENSP00000302768 | ENSP00000358563 |
| ENSP00000302768 | ENSP00000359688 |
| ENSP00000302768 | ENSP00000359837 |
| ENSP00000302768 | ENSP00000362900 |
| ENSP00000302768 | ENSP00000371546 |
| ENSP00000302768 | ENSP00000382779 |
| ENSP00000302768 | ENSP00000402338 |
| ENSP00000302783 | ENSP00000310521 |
| ENSP00000302783 | ENSP00000311134 |
| ENSP00000302783 | ENSP00000316990 |
| ENSP00000302783 | ENSP00000326869 |
| ENSP00000302783 | ENSP00000336724 |
| ENSP00000302783 | ENSP00000352708 |
| ENSP00000302783 | ENSP00000356231 |
| ENSP00000302783 | ENSP00000373979 |
| ENSP00000302783 | ENSP00000397441 |
| ENSP00000302783 | ENSP00000402935 |
| ENSP00000302790 | ENSP00000302886 |
| ENSP00000302790 | ENSP00000305503 |
| ENSP00000302790 | ENSP00000310668 |
| ENSP00000302790 | ENSP00000314004 |
| ENSP00000302790 | ENSP00000315791 |
| ENSP00000302790 | ENSP00000316032 |
| ENSP00000302790 | ENSP00000318604 |
| ENSP00000302790 | ENSP00000346453 |
| ENSP00000302790 | ENSP00000348577 |
| ENSP00000302790 | ENSP00000354720 |
| ENSP00000302790 | ENSP00000354742 |
| ENSP00000302790 | ENSP00000355809 |
| ENSP00000302790 | ENSP00000355890 |
| ENSP00000302790 | ENSP00000356405 |
| ENSP00000302790 | ENSP00000356548 |
| ENSP00000302790 | ENSP00000356744 |
| ENSP00000302790 | ENSP00000357907 |
| ENSP00000302790 | ENSP00000359000 |
| ENSP00000302790 | ENSP00000361186 |
| ENSP00000302790 | ENSP00000361287 |
| ENSP00000302790 | ENSP00000371155 |
| ENSP00000302790 | ENSP00000373715 |
| ENSP00000302790 | ENSP00000381565 |
| ENSP00000302790 | ENSP00000381567 |
| ENSP00000302801 | ENSP00000304668 |
| ENSP00000302801 | ENSP00000307077 |
| ENSP00000302801 | ENSP00000314311 |
| ENSP00000302801 | ENSP00000321711 |

|                 |                 |
|-----------------|-----------------|
| ENSP00000302801 | ENSP00000325448 |
| ENSP00000302801 | ENSP00000327821 |
| ENSP00000302801 | ENSP00000329411 |
| ENSP00000302801 | ENSP00000332171 |
| ENSP00000302801 | ENSP00000363779 |
| ENSP00000302801 | ENSP00000364320 |
| ENSP00000302801 | ENSP00000367498 |
| ENSP00000302801 | ENSP00000380460 |
| ENSP00000302801 | ENSP00000394869 |
| ENSP00000302830 | ENSP00000320623 |
| ENSP00000302830 | ENSP00000344566 |
| ENSP00000302830 | ENSP00000351221 |
| ENSP00000302886 | ENSP00000305503 |
| ENSP00000302886 | ENSP00000307525 |
| ENSP00000302886 | ENSP00000307889 |
| ENSP00000302886 | ENSP00000307939 |
| ENSP00000302886 | ENSP00000309334 |
| ENSP00000302886 | ENSP00000310042 |
| ENSP00000302886 | ENSP00000310668 |
| ENSP00000302886 | ENSP00000311430 |
| ENSP00000302886 | ENSP00000312981 |
| ENSP00000302886 | ENSP00000316032 |
| ENSP00000302886 | ENSP00000317992 |
| ENSP00000302886 | ENSP00000318195 |
| ENSP00000302886 | ENSP00000322396 |
| ENSP00000302886 | ENSP00000322419 |
| ENSP00000302886 | ENSP00000323858 |
| ENSP00000302886 | ENSP00000328690 |
| ENSP00000302886 | ENSP00000333667 |
| ENSP00000302886 | ENSP00000338573 |
| ENSP00000302886 | ENSP00000338862 |
| ENSP00000302886 | ENSP00000338990 |
| ENSP00000302886 | ENSP00000339145 |
| ENSP00000302886 | ENSP00000339795 |
| ENSP00000302886 | ENSP00000341551 |
| ENSP00000302886 | ENSP00000343313 |
| ENSP00000302886 | ENSP00000343741 |
| ENSP00000302886 | ENSP00000344220 |
| ENSP00000302886 | ENSP00000345156 |
| ENSP00000302886 | ENSP00000346015 |
| ENSP00000302886 | ENSP00000346022 |
| ENSP00000302886 | ENSP00000346027 |
| ENSP00000302886 | ENSP00000346453 |
| ENSP00000302886 | ENSP00000346725 |
| ENSP00000302886 | ENSP00000347719 |
| ENSP00000302886 | ENSP00000348565 |

|                 |                 |
|-----------------|-----------------|
| ENSP00000302886 | ENSP00000348596 |
| ENSP00000302886 | ENSP00000350967 |
| ENSP00000302886 | ENSP00000351380 |
| ENSP00000302886 | ENSP00000352021 |
| ENSP00000302886 | ENSP00000352400 |
| ENSP00000302886 | ENSP00000352645 |
| ENSP00000302886 | ENSP00000352928 |
| ENSP00000302886 | ENSP00000353622 |
| ENSP00000302886 | ENSP00000354040 |
| ENSP00000302886 | ENSP00000354522 |
| ENSP00000302886 | ENSP00000354558 |
| ENSP00000302886 | ENSP00000354739 |
| ENSP00000302886 | ENSP00000358400 |
| ENSP00000302886 | ENSP00000359345 |
| ENSP00000302886 | ENSP00000359688 |
| ENSP00000302886 | ENSP00000360286 |
| ENSP00000302886 | ENSP00000360412 |
| ENSP00000302886 | ENSP00000360828 |
| ENSP00000302886 | ENSP00000361076 |
| ENSP00000302886 | ENSP00000361640 |
| ENSP00000302886 | ENSP00000362153 |
| ENSP00000302886 | ENSP00000362900 |
| ENSP00000302886 | ENSP00000363018 |
| ENSP00000302886 | ENSP00000363373 |
| ENSP00000302886 | ENSP00000363384 |
| ENSP00000302886 | ENSP00000363559 |
| ENSP00000302886 | ENSP00000363676 |
| ENSP00000302886 | ENSP00000364037 |
| ENSP00000302886 | ENSP00000364320 |
| ENSP00000302886 | ENSP00000365806 |
| ENSP00000302886 | ENSP00000366519 |
| ENSP00000302886 | ENSP00000368612 |
| ENSP00000302886 | ENSP00000369042 |
| ENSP00000302886 | ENSP00000370376 |
| ENSP00000302886 | ENSP00000370968 |
| ENSP00000302886 | ENSP00000371155 |
| ENSP00000302886 | ENSP00000371451 |
| ENSP00000302886 | ENSP00000372199 |
| ENSP00000302886 | ENSP00000373090 |
| ENSP00000302886 | ENSP00000377640 |
| ENSP00000302886 | ENSP00000377954 |
| ENSP00000302886 | ENSP00000378160 |
| ENSP00000302886 | ENSP00000379888 |
| ENSP00000302886 | ENSP00000380982 |
| ENSP00000302886 | ENSP00000382392 |
| ENSP00000302886 | ENSP00000386717 |

|                 |                 |
|-----------------|-----------------|
| ENSP00000302886 | ENSP00000389103 |
| ENSP00000302886 | ENSP00000393393 |
| ENSP00000302886 | ENSP00000394290 |
| ENSP00000302886 | ENSP00000402338 |
| ENSP00000302886 | ENSP00000403576 |
| ENSP00000302886 | ENSP00000409074 |
| ENSP00000302886 | ENSP00000409367 |
| ENSP00000302886 | ENSP00000411162 |
| ENSP00000302886 | ENSP00000417281 |
| ENSP00000302886 | ENSP00000419740 |
| ENSP00000302896 | ENSP00000306548 |
| ENSP00000302896 | ENSP00000308546 |
| ENSP00000302896 | ENSP00000308897 |
| ENSP00000302896 | ENSP00000309334 |
| ENSP00000302896 | ENSP00000311028 |
| ENSP00000302896 | ENSP00000311430 |
| ENSP00000302896 | ENSP00000314311 |
| ENSP00000302896 | ENSP00000315674 |
| ENSP00000302896 | ENSP00000317376 |
| ENSP00000302896 | ENSP00000318646 |
| ENSP00000302896 | ENSP00000319977 |
| ENSP00000302896 | ENSP00000320917 |
| ENSP00000302896 | ENSP00000322419 |
| ENSP00000302896 | ENSP00000323856 |
| ENSP00000302896 | ENSP00000325376 |
| ENSP00000302896 | ENSP00000328854 |
| ENSP00000302896 | ENSP00000331019 |
| ENSP00000302896 | ENSP00000336702 |
| ENSP00000302896 | ENSP00000336712 |
| ENSP00000302896 | ENSP00000337127 |
| ENSP00000302896 | ENSP00000339095 |
| ENSP00000302896 | ENSP00000341885 |
| ENSP00000302896 | ENSP00000345096 |
| ENSP00000302896 | ENSP00000345156 |
| ENSP00000302896 | ENSP00000346015 |
| ENSP00000302896 | ENSP00000346022 |
| ENSP00000302896 | ENSP00000346037 |
| ENSP00000302896 | ENSP00000346050 |
| ENSP00000302896 | ENSP00000346067 |
| ENSP00000302896 | ENSP00000347087 |
| ENSP00000302896 | ENSP00000352738 |
| ENSP00000302896 | ENSP00000354739 |
| ENSP00000302896 | ENSP00000355471 |
| ENSP00000302896 | ENSP00000355541 |
| ENSP00000302896 | ENSP00000356130 |
| ENSP00000302896 | ENSP00000356134 |

|                 |                 |
|-----------------|-----------------|
| ENSP00000302896 | ENSP00000358140 |
| ENSP00000302896 | ENSP00000359345 |
| ENSP00000302896 | ENSP00000359688 |
| ENSP00000302896 | ENSP00000360031 |
| ENSP00000302896 | ENSP00000361076 |
| ENSP00000302896 | ENSP00000362036 |
| ENSP00000302896 | ENSP00000362306 |
| ENSP00000302896 | ENSP00000362688 |
| ENSP00000302896 | ENSP00000362744 |
| ENSP00000302896 | ENSP00000363018 |
| ENSP00000302896 | ENSP00000363308 |
| ENSP00000302896 | ENSP00000363642 |
| ENSP00000302896 | ENSP00000363676 |
| ENSP00000302896 | ENSP00000363746 |
| ENSP00000302896 | ENSP00000364320 |
| ENSP00000302896 | ENSP00000365837 |
| ENSP00000302896 | ENSP00000368565 |
| ENSP00000302896 | ENSP00000368790 |
| ENSP00000302896 | ENSP00000369757 |
| ENSP00000302896 | ENSP00000370589 |
| ENSP00000302896 | ENSP00000371101 |
| ENSP00000302896 | ENSP00000372445 |
| ENSP00000302896 | ENSP00000372695 |
| ENSP00000302896 | ENSP00000375730 |
| ENSP00000302896 | ENSP00000377486 |
| ENSP00000302896 | ENSP00000377640 |
| ENSP00000302896 | ENSP00000379339 |
| ENSP00000302896 | ENSP00000379607 |
| ENSP00000302896 | ENSP00000379888 |
| ENSP00000302896 | ENSP00000384302 |
| ENSP00000302896 | ENSP00000389103 |
| ENSP00000302896 | ENSP00000392859 |
| ENSP00000302896 | ENSP00000393241 |
| ENSP00000302896 | ENSP00000399454 |
| ENSP00000302896 | ENSP00000402338 |
| ENSP00000302896 | ENSP00000402869 |
| ENSP00000302896 | ENSP00000403175 |
| ENSP00000302896 | ENSP00000405614 |
| ENSP00000302896 | ENSP00000412583 |
| ENSP00000302896 | ENSP00000414321 |
| ENSP00000302896 | ENSP00000416110 |
| ENSP00000302896 | ENSP00000420714 |
| ENSP00000302913 | ENSP00000309968 |
| ENSP00000302913 | ENSP00000313691 |
| ENSP00000302913 | ENSP00000360798 |
| ENSP00000302913 | ENSP00000362727 |

|                 |                 |
|-----------------|-----------------|
| ENSP00000302913 | ENSP00000365401 |
| ENSP00000302913 | ENSP00000380921 |
| ENSP00000302935 | ENSP00000312318 |
| ENSP00000302935 | ENSP00000360500 |
| ENSP00000302951 | ENSP00000314733 |
| ENSP00000302951 | ENSP00000353622 |
| ENSP00000302951 | ENSP00000367910 |
| ENSP00000302951 | ENSP00000373952 |
| ENSP00000302951 | ENSP00000385021 |
| ENSP00000302955 | ENSP00000304370 |
| ENSP00000302955 | ENSP00000307853 |
| ENSP00000302955 | ENSP00000310520 |
| ENSP00000302955 | ENSP00000315700 |
| ENSP00000302955 | ENSP00000320648 |
| ENSP00000302955 | ENSP00000322180 |
| ENSP00000302955 | ENSP00000322570 |
| ENSP00000302955 | ENSP00000330836 |
| ENSP00000302955 | ENSP00000340879 |
| ENSP00000302955 | ENSP00000341382 |
| ENSP00000302955 | ENSP00000343701 |
| ENSP00000302955 | ENSP00000343741 |
| ENSP00000302955 | ENSP00000351697 |
| ENSP00000302955 | ENSP00000354522 |
| ENSP00000302955 | ENSP00000354720 |
| ENSP00000302955 | ENSP00000355958 |
| ENSP00000302955 | ENSP00000360031 |
| ENSP00000302955 | ENSP00000361418 |
| ENSP00000302955 | ENSP00000365534 |
| ENSP00000302955 | ENSP00000368349 |
| ENSP00000302955 | ENSP00000370151 |
| ENSP00000302955 | ENSP00000372023 |
| ENSP00000302955 | ENSP00000377914 |
| ENSP00000302955 | ENSP00000378529 |
| ENSP00000302955 | ENSP00000380256 |
| ENSP00000303015 | ENSP00000307863 |
| ENSP00000303015 | ENSP00000312066 |
| ENSP00000303015 | ENSP00000362820 |
| ENSP00000303028 | ENSP00000353701 |
| ENSP00000303042 | ENSP00000350249 |
| ENSP00000303042 | ENSP00000377496 |
| ENSP00000303088 | ENSP00000314949 |
| ENSP00000303088 | ENSP00000321711 |
| ENSP00000303088 | ENSP00000324124 |
| ENSP00000303088 | ENSP00000334564 |
| ENSP00000303088 | ENSP00000341243 |
| ENSP00000303088 | ENSP00000344352 |

|                 |                 |
|-----------------|-----------------|
| ENSP00000303088 | ENSP00000347345 |
| ENSP00000303088 | ENSP00000360532 |
| ENSP00000303088 | ENSP00000361465 |
| ENSP00000303088 | ENSP00000366828 |
| ENSP00000303088 | ENSP00000378736 |
| ENSP00000303088 | ENSP00000382058 |
| ENSP00000303088 | ENSP00000403852 |
| ENSP00000303148 | ENSP00000347948 |
| ENSP00000303191 | ENSP00000303712 |
| ENSP00000303191 | ENSP00000304350 |
| ENSP00000303191 | ENSP00000304370 |
| ENSP00000303191 | ENSP00000305790 |
| ENSP00000303191 | ENSP00000308369 |
| ENSP00000303191 | ENSP00000314311 |
| ENSP00000303191 | ENSP00000314792 |
| ENSP00000303191 | ENSP00000318861 |
| ENSP00000303191 | ENSP00000325376 |
| ENSP00000303191 | ENSP00000326261 |
| ENSP00000303191 | ENSP00000326806 |
| ENSP00000303191 | ENSP00000331817 |
| ENSP00000303191 | ENSP00000331907 |
| ENSP00000303191 | ENSP00000332103 |
| ENSP00000303191 | ENSP00000334148 |
| ENSP00000303191 | ENSP00000335321 |
| ENSP00000303191 | ENSP00000337194 |
| ENSP00000303191 | ENSP00000342374 |
| ENSP00000303191 | ENSP00000343557 |
| ENSP00000303191 | ENSP00000343701 |
| ENSP00000303191 | ENSP00000346986 |
| ENSP00000303191 | ENSP00000351137 |
| ENSP00000303191 | ENSP00000353246 |
| ENSP00000303191 | ENSP00000354125 |
| ENSP00000303191 | ENSP00000355050 |
| ENSP00000303191 | ENSP00000357631 |
| ENSP00000303191 | ENSP00000358554 |
| ENSP00000303191 | ENSP00000360532 |
| ENSP00000303191 | ENSP00000361557 |
| ENSP00000303191 | ENSP00000361577 |
| ENSP00000303191 | ENSP00000362110 |
| ENSP00000303191 | ENSP00000362936 |
| ENSP00000303191 | ENSP00000364289 |
| ENSP00000303191 | ENSP00000366557 |
| ENSP00000303191 | ENSP00000370377 |
| ENSP00000303191 | ENSP00000376309 |
| ENSP00000303191 | ENSP00000376973 |
| ENSP00000303191 | ENSP00000379607 |

|                 |                 |
|-----------------|-----------------|
| ENSP00000303191 | ENSP00000384573 |
| ENSP00000303191 | ENSP00000387006 |
| ENSP00000303191 | ENSP00000391432 |
| ENSP00000303191 | ENSP00000412566 |
| ENSP00000303191 | ENSP00000416959 |
| ENSP00000303191 | ENSP00000417451 |
| ENSP00000303191 | ENSP00000420195 |
| ENSP00000303208 | ENSP00000307567 |
| ENSP00000303208 | ENSP00000312150 |
| ENSP00000303208 | ENSP00000336712 |
| ENSP00000303208 | ENSP00000337127 |
| ENSP00000303208 | ENSP00000365943 |
| ENSP00000303231 | ENSP00000314425 |
| ENSP00000303231 | ENSP00000352425 |
| ENSP00000303231 | ENSP00000357470 |
| ENSP00000303248 | ENSP00000315615 |
| ENSP00000303279 | ENSP00000311505 |
| ENSP00000303279 | ENSP00000320309 |
| ENSP00000303279 | ENSP00000329466 |
| ENSP00000303279 | ENSP00000333376 |
| ENSP00000303279 | ENSP00000344055 |
| ENSP00000303279 | ENSP00000348965 |
| ENSP00000303279 | ENSP00000349887 |
| ENSP00000303279 | ENSP00000350199 |
| ENSP00000303279 | ENSP00000355922 |
| ENSP00000303279 | ENSP00000361180 |
| ENSP00000303279 | ENSP00000362576 |
| ENSP00000303279 | ENSP00000367498 |
| ENSP00000303279 | ENSP00000382177 |
| ENSP00000303279 | ENSP00000382492 |
| ENSP00000303315 | ENSP00000306245 |
| ENSP00000303315 | ENSP00000306983 |
| ENSP00000303315 | ENSP00000307684 |
| ENSP00000303315 | ENSP00000308774 |
| ENSP00000303315 | ENSP00000314949 |
| ENSP00000303315 | ENSP00000322419 |
| ENSP00000303315 | ENSP00000327048 |
| ENSP00000303315 | ENSP00000335044 |
| ENSP00000303315 | ENSP00000336790 |
| ENSP00000303315 | ENSP00000340900 |
| ENSP00000303315 | ENSP00000341208 |
| ENSP00000303315 | ENSP00000341551 |
| ENSP00000303315 | ENSP00000344352 |
| ENSP00000303315 | ENSP00000344537 |
| ENSP00000303315 | ENSP00000345530 |
| ENSP00000303315 | ENSP00000347602 |



|                 |                 |
|-----------------|-----------------|
| ENSP00000303315 | ENSP00000347733 |
| ENSP00000303315 | ENSP00000347802 |
| ENSP00000303315 | ENSP00000350078 |
| ENSP00000303315 | ENSP00000350283 |
| ENSP00000303315 | ENSP00000353073 |
| ENSP00000303315 | ENSP00000353538 |
| ENSP00000303315 | ENSP00000353575 |
| ENSP00000303315 | ENSP00000353698 |
| ENSP00000303315 | ENSP00000355051 |
| ENSP00000303315 | ENSP00000355866 |
| ENSP00000303315 | ENSP00000356641 |
| ENSP00000303315 | ENSP00000357494 |
| ENSP00000303315 | ENSP00000357907 |
| ENSP00000303315 | ENSP00000358335 |
| ENSP00000303315 | ENSP00000358854 |
| ENSP00000303315 | ENSP00000359290 |
| ENSP00000303315 | ENSP00000359356 |
| ENSP00000303315 | ENSP00000360116 |
| ENSP00000303315 | ENSP00000360515 |
| ENSP00000303315 | ENSP00000364898 |
| ENSP00000303315 | ENSP00000369270 |
| ENSP00000303315 | ENSP00000369695 |
| ENSP00000303315 | ENSP00000373700 |
| ENSP00000303315 | ENSP00000376611 |
| ENSP00000303315 | ENSP00000382423 |
| ENSP00000303315 | ENSP00000393596 |
| ENSP00000303315 | ENSP00000399309 |
| ENSP00000303315 | ENSP00000399511 |
| ENSP00000303315 | ENSP00000413632 |
| ENSP00000303325 | ENSP00000321106 |
| ENSP00000303325 | ENSP00000334042 |
| ENSP00000303325 | ENSP00000355146 |
| ENSP00000303366 | ENSP00000360060 |
| ENSP00000303366 | ENSP00000379383 |
| ENSP00000303394 | ENSP00000337194 |
| ENSP00000303394 | ENSP00000360530 |
| ENSP00000303398 | ENSP00000417281 |
| ENSP00000303423 | ENSP00000315768 |
| ENSP00000303423 | ENSP00000334061 |
| ENSP00000303423 | ENSP00000339353 |
| ENSP00000303423 | ENSP00000355511 |
| ENSP00000303423 | ENSP00000355922 |
| ENSP00000303423 | ENSP00000360916 |
| ENSP00000303423 | ENSP00000366557 |
| ENSP00000303423 | ENSP00000375730 |
| ENSP00000303423 | ENSP00000394071 |

|                 |                 |
|-----------------|-----------------|
| ENSP00000303434 | ENSP00000310585 |
| ENSP00000303434 | ENSP00000321449 |
| ENSP00000303434 | ENSP00000332721 |
| ENSP00000303434 | ENSP00000339795 |
| ENSP00000303434 | ENSP00000350549 |
| ENSP00000303434 | ENSP00000360916 |
| ENSP00000303434 | ENSP00000365891 |
| ENSP00000303434 | ENSP00000380460 |
| ENSP00000303452 | ENSP00000368766 |
| ENSP00000303476 | ENSP00000360532 |
| ENSP00000303482 | ENSP00000343435 |
| ENSP00000303507 | ENSP00000307491 |
| ENSP00000303507 | ENSP00000317431 |
| ENSP00000303507 | ENSP00000318884 |
| ENSP00000303507 | ENSP00000320543 |
| ENSP00000303507 | ENSP00000322957 |
| ENSP00000303507 | ENSP00000333950 |
| ENSP00000303507 | ENSP00000339381 |
| ENSP00000303507 | ENSP00000340698 |
| ENSP00000303507 | ENSP00000340944 |
| ENSP00000303507 | ENSP00000345731 |
| ENSP00000303507 | ENSP00000349959 |
| ENSP00000303507 | ENSP00000352121 |
| ENSP00000303507 | ENSP00000354927 |
| ENSP00000303507 | ENSP00000356595 |
| ENSP00000303507 | ENSP00000360916 |
| ENSP00000303507 | ENSP00000365005 |
| ENSP00000303507 | ENSP00000366121 |
| ENSP00000303507 | ENSP00000366565 |
| ENSP00000303507 | ENSP00000373600 |
| ENSP00000303507 | ENSP00000376410 |
| ENSP00000303507 | ENSP00000381793 |
| ENSP00000303507 | ENSP00000382423 |
| ENSP00000303507 | ENSP00000383623 |
| ENSP00000303507 | ENSP00000384675 |
| ENSP00000303507 | ENSP00000391249 |
| ENSP00000303507 | ENSP00000397351 |
| ENSP00000303511 | ENSP00000309141 |
| ENSP00000303511 | ENSP00000311028 |
| ENSP00000303511 | ENSP00000317087 |
| ENSP00000303511 | ENSP00000317468 |
| ENSP00000303511 | ENSP00000331106 |
| ENSP00000303511 | ENSP00000346015 |
| ENSP00000303511 | ENSP00000349016 |
| ENSP00000303511 | ENSP00000360412 |
| ENSP00000303511 | ENSP00000366565 |

|                 |                 |
|-----------------|-----------------|
| ENSP00000303511 | ENSP00000407401 |
| ENSP00000303515 | ENSP00000314441 |
| ENSP00000303515 | ENSP00000328671 |
| ENSP00000303515 | ENSP00000356476 |
| ENSP00000303515 | ENSP00000361465 |
| ENSP00000303515 | ENSP00000364289 |
| ENSP00000303515 | ENSP00000365837 |
| ENSP00000303515 | ENSP00000366135 |
| ENSP00000303515 | ENSP00000370741 |
| ENSP00000303515 | ENSP00000403852 |
| ENSP00000303552 | ENSP00000325562 |
| ENSP00000303552 | ENSP00000340019 |
| ENSP00000303552 | ENSP00000343081 |
| ENSP00000303552 | ENSP00000348722 |
| ENSP00000303552 | ENSP00000387262 |
| ENSP00000303554 | ENSP00000334188 |
| ENSP00000303554 | ENSP00000342793 |
| ENSP00000303554 | ENSP00000344106 |
| ENSP00000303554 | ENSP00000346255 |
| ENSP00000303554 | ENSP00000359518 |
| ENSP00000303554 | ENSP00000360183 |
| ENSP00000303554 | ENSP00000360473 |
| ENSP00000303554 | ENSP00000368439 |
| ENSP00000303554 | ENSP00000381293 |
| ENSP00000303554 | ENSP00000387019 |
| ENSP00000303570 | ENSP00000350249 |
| ENSP00000303570 | ENSP00000377496 |
| ENSP00000303584 | ENSP00000309433 |
| ENSP00000303584 | ENSP00000353698 |
| ENSP00000303584 | ENSP00000353741 |
| ENSP00000303584 | ENSP00000359904 |
| ENSP00000303584 | ENSP00000367637 |
| ENSP00000303584 | ENSP00000368790 |
| ENSP00000303584 | ENSP00000374219 |
| ENSP00000303712 | ENSP00000335321 |
| ENSP00000303712 | ENSP00000362110 |
| ENSP00000303712 | ENSP00000362820 |
| ENSP00000303712 | ENSP00000366557 |
| ENSP00000303712 | ENSP00000376973 |
| ENSP00000303712 | ENSP00000416959 |
| ENSP00000303769 | ENSP00000304903 |
| ENSP00000303769 | ENSP00000387170 |
| ENSP00000303920 | ENSP00000312664 |
| ENSP00000303928 | ENSP00000313059 |
| ENSP00000303939 | ENSP00000319476 |
| ENSP00000303939 | ENSP00000332049 |

|                 |                 |
|-----------------|-----------------|
| ENSP00000303939 | ENSP00000340944 |
| ENSP00000303939 | ENSP00000341208 |
| ENSP00000304051 | ENSP00000304102 |
| ENSP00000304051 | ENSP00000310040 |
| ENSP00000304051 | ENSP00000344741 |
| ENSP00000304051 | ENSP00000347836 |
| ENSP00000304051 | ENSP00000350512 |
| ENSP00000304051 | ENSP00000354201 |
| ENSP00000304051 | ENSP00000358140 |
| ENSP00000304051 | ENSP00000360116 |
| ENSP00000304051 | ENSP00000360621 |
| ENSP00000304051 | ENSP00000384900 |
| ENSP00000304102 | ENSP00000304147 |
| ENSP00000304102 | ENSP00000304822 |
| ENSP00000304102 | ENSP00000307833 |
| ENSP00000304102 | ENSP00000309334 |
| ENSP00000304102 | ENSP00000311083 |
| ENSP00000304102 | ENSP00000317780 |
| ENSP00000304102 | ENSP00000322396 |
| ENSP00000304102 | ENSP00000323822 |
| ENSP00000304102 | ENSP00000325448 |
| ENSP00000304102 | ENSP00000337405 |
| ENSP00000304102 | ENSP00000341030 |
| ENSP00000304102 | ENSP00000341243 |
| ENSP00000304102 | ENSP00000343701 |
| ENSP00000304102 | ENSP00000346340 |
| ENSP00000304102 | ENSP00000350512 |
| ENSP00000304102 | ENSP00000352928 |
| ENSP00000304102 | ENSP00000354673 |
| ENSP00000304102 | ENSP00000355958 |
| ENSP00000304102 | ENSP00000356641 |
| ENSP00000304102 | ENSP00000357260 |
| ENSP00000304102 | ENSP00000360286 |
| ENSP00000304102 | ENSP00000361699 |
| ENSP00000304102 | ENSP00000363021 |
| ENSP00000304102 | ENSP00000365811 |
| ENSP00000304102 | ENSP00000370671 |
| ENSP00000304102 | ENSP00000376945 |
| ENSP00000304102 | ENSP00000380702 |
| ENSP00000304102 | ENSP00000384109 |
| ENSP00000304102 | ENSP00000384211 |
| ENSP00000304102 | ENSP00000386121 |
| ENSP00000304102 | ENSP00000386227 |
| ENSP00000304102 | ENSP00000401508 |
| ENSP00000304102 | ENSP00000417748 |
| ENSP00000304102 | ENSP00000417763 |

|                 |                 |
|-----------------|-----------------|
| ENSP00000304133 | ENSP00000363021 |
| ENSP00000304133 | ENSP00000379607 |
| ENSP00000304169 | ENSP00000311290 |
| ENSP00000304169 | ENSP00000318195 |
| ENSP00000304169 | ENSP00000344456 |
| ENSP00000304169 | ENSP00000348168 |
| ENSP00000304169 | ENSP00000353698 |
| ENSP00000304169 | ENSP00000355296 |
| ENSP00000304169 | ENSP00000359531 |
| ENSP00000304169 | ENSP00000361064 |
| ENSP00000304169 | ENSP00000363779 |
| ENSP00000304169 | ENSP00000365439 |
| ENSP00000304169 | ENSP00000370256 |
| ENSP00000304169 | ENSP00000381657 |
| ENSP00000304169 | ENSP00000392466 |
| ENSP00000304185 | ENSP00000354518 |
| ENSP00000304226 | ENSP00000307900 |
| ENSP00000304226 | ENSP00000317904 |
| ENSP00000304226 | ENSP00000322218 |
| ENSP00000304226 | ENSP00000344215 |
| ENSP00000304226 | ENSP00000347979 |
| ENSP00000304226 | ENSP00000350283 |
| ENSP00000304226 | ENSP00000353698 |
| ENSP00000304226 | ENSP00000355153 |
| ENSP00000304226 | ENSP00000357440 |
| ENSP00000304226 | ENSP00000372023 |
| ENSP00000304226 | ENSP00000396876 |
| ENSP00000304226 | ENSP00000402084 |
| ENSP00000304236 | ENSP00000316333 |
| ENSP00000304236 | ENSP00000363089 |
| ENSP00000304236 | ENSP00000365435 |
| ENSP00000304250 | ENSP00000348602 |
| ENSP00000304292 | ENSP00000334100 |
| ENSP00000304292 | ENSP00000353564 |
| ENSP00000304292 | ENSP00000354486 |
| ENSP00000304292 | ENSP00000354957 |
| ENSP00000304292 | ENSP00000356465 |
| ENSP00000304292 | ENSP00000364212 |
| ENSP00000304292 | ENSP00000381293 |
| ENSP00000304292 | ENSP00000419628 |
| ENSP00000304308 | ENSP00000311825 |
| ENSP00000304308 | ENSP00000349049 |
| ENSP00000304311 | ENSP00000307046 |
| ENSP00000304311 | ENSP00000346839 |
| ENSP00000304311 | ENSP00000350447 |
| ENSP00000304311 | ENSP00000370719 |

|                 |                 |
|-----------------|-----------------|
| ENSP00000304311 | ENSP00000380921 |
| ENSP00000304311 | ENSP00000406482 |
| ENSP00000304321 | ENSP00000312735 |
| ENSP00000304321 | ENSP00000324124 |
| ENSP00000304321 | ENSP00000354201 |
| ENSP00000304321 | ENSP00000360116 |
| ENSP00000304321 | ENSP00000403852 |
| ENSP00000304327 | ENSP00000312981 |
| ENSP00000304327 | ENSP00000319169 |
| ENSP00000304327 | ENSP00000350767 |
| ENSP00000304327 | ENSP00000415151 |
| ENSP00000304350 | ENSP00000304370 |
| ENSP00000304350 | ENSP00000304668 |
| ENSP00000304350 | ENSP00000304903 |
| ENSP00000304350 | ENSP00000305790 |
| ENSP00000304350 | ENSP00000308546 |
| ENSP00000304350 | ENSP00000310440 |
| ENSP00000304350 | ENSP00000310448 |
| ENSP00000304350 | ENSP00000310596 |
| ENSP00000304350 | ENSP00000310723 |
| ENSP00000304350 | ENSP00000312981 |
| ENSP00000304350 | ENSP00000313674 |
| ENSP00000304350 | ENSP00000313829 |
| ENSP00000304350 | ENSP00000315379 |
| ENSP00000304350 | ENSP00000315859 |
| ENSP00000304350 | ENSP00000316240 |
| ENSP00000304350 | ENSP00000318861 |
| ENSP00000304350 | ENSP00000319341 |
| ENSP00000304350 | ENSP00000324122 |
| ENSP00000304350 | ENSP00000326261 |
| ENSP00000304350 | ENSP00000326806 |
| ENSP00000304350 | ENSP00000328992 |
| ENSP00000304350 | ENSP00000329466 |
| ENSP00000304350 | ENSP00000331087 |
| ENSP00000304350 | ENSP00000331907 |
| ENSP00000304350 | ENSP00000334148 |
| ENSP00000304350 | ENSP00000335321 |
| ENSP00000304350 | ENSP00000337194 |
| ENSP00000304350 | ENSP00000341243 |
| ENSP00000304350 | ENSP00000342032 |
| ENSP00000304350 | ENSP00000342374 |
| ENSP00000304350 | ENSP00000343557 |
| ENSP00000304350 | ENSP00000345530 |
| ENSP00000304350 | ENSP00000346120 |
| ENSP00000304350 | ENSP00000346762 |
| ENSP00000304350 | ENSP00000346892 |

|                 |                 |
|-----------------|-----------------|
| ENSP00000304350 | ENSP00000346986 |
| ENSP00000304350 | ENSP00000348010 |
| ENSP00000304350 | ENSP00000351137 |
| ENSP00000304350 | ENSP00000351492 |
| ENSP00000304350 | ENSP00000353564 |
| ENSP00000304350 | ENSP00000354518 |
| ENSP00000304350 | ENSP00000354522 |
| ENSP00000304350 | ENSP00000354951 |
| ENSP00000304350 | ENSP00000356520 |
| ENSP00000304350 | ENSP00000357631 |
| ENSP00000304350 | ENSP00000358554 |
| ENSP00000304350 | ENSP00000360532 |
| ENSP00000304350 | ENSP00000361577 |
| ENSP00000304350 | ENSP00000362041 |
| ENSP00000304350 | ENSP00000362110 |
| ENSP00000304350 | ENSP00000362936 |
| ENSP00000304350 | ENSP00000363313 |
| ENSP00000304350 | ENSP00000364289 |
| ENSP00000304350 | ENSP00000364813 |
| ENSP00000304350 | ENSP00000366179 |
| ENSP00000304350 | ENSP00000366557 |
| ENSP00000304350 | ENSP00000366607 |
| ENSP00000304350 | ENSP00000367835 |
| ENSP00000304350 | ENSP00000368523 |
| ENSP00000304350 | ENSP00000368589 |
| ENSP00000304350 | ENSP00000368801 |
| ENSP00000304350 | ENSP00000370126 |
| ENSP00000304350 | ENSP00000370589 |
| ENSP00000304350 | ENSP00000371451 |
| ENSP00000304350 | ENSP00000372883 |
| ENSP00000304350 | ENSP00000376973 |
| ENSP00000304350 | ENSP00000377262 |
| ENSP00000304350 | ENSP00000378605 |
| ENSP00000304350 | ENSP00000379607 |
| ENSP00000304350 | ENSP00000387006 |
| ENSP00000304350 | ENSP00000387170 |
| ENSP00000304350 | ENSP00000393953 |
| ENSP00000304350 | ENSP00000400591 |
| ENSP00000304350 | ENSP00000401566 |
| ENSP00000304350 | ENSP00000403345 |
| ENSP00000304350 | ENSP00000406280 |
| ENSP00000304350 | ENSP00000410758 |
| ENSP00000304350 | ENSP00000412566 |
| ENSP00000304350 | ENSP00000414006 |
| ENSP00000304350 | ENSP00000414634 |
| ENSP00000304353 | ENSP00000317691 |

|                 |                 |
|-----------------|-----------------|
| ENSP00000304353 | ENSP00000362314 |
| ENSP00000304353 | ENSP00000367439 |
| ENSP00000304353 | ENSP00000369391 |
| ENSP00000304353 | ENSP00000370119 |
| ENSP00000304353 | ENSP00000389182 |
| ENSP00000304360 | ENSP00000349594 |
| ENSP00000304370 | ENSP00000305790 |
| ENSP00000304370 | ENSP00000306983 |
| ENSP00000304370 | ENSP00000307863 |
| ENSP00000304370 | ENSP00000308369 |
| ENSP00000304370 | ENSP00000311083 |
| ENSP00000304370 | ENSP00000318861 |
| ENSP00000304370 | ENSP00000319341 |
| ENSP00000304370 | ENSP00000326411 |
| ENSP00000304370 | ENSP00000326806 |
| ENSP00000304370 | ENSP00000331907 |
| ENSP00000304370 | ENSP00000332103 |
| ENSP00000304370 | ENSP00000335321 |
| ENSP00000304370 | ENSP00000340019 |
| ENSP00000304370 | ENSP00000341885 |
| ENSP00000304370 | ENSP00000342374 |
| ENSP00000304370 | ENSP00000343557 |
| ENSP00000304370 | ENSP00000348010 |
| ENSP00000304370 | ENSP00000349959 |
| ENSP00000304370 | ENSP00000351137 |
| ENSP00000304370 | ENSP00000351492 |
| ENSP00000304370 | ENSP00000356541 |
| ENSP00000304370 | ENSP00000356652 |
| ENSP00000304370 | ENSP00000357440 |
| ENSP00000304370 | ENSP00000357631 |
| ENSP00000304370 | ENSP00000358554 |
| ENSP00000304370 | ENSP00000359837 |
| ENSP00000304370 | ENSP00000360116 |
| ENSP00000304370 | ENSP00000360497 |
| ENSP00000304370 | ENSP00000360532 |
| ENSP00000304370 | ENSP00000361047 |
| ENSP00000304370 | ENSP00000361557 |
| ENSP00000304370 | ENSP00000361577 |
| ENSP00000304370 | ENSP00000362110 |
| ENSP00000304370 | ENSP00000362413 |
| ENSP00000304370 | ENSP00000363021 |
| ENSP00000304370 | ENSP00000364289 |
| ENSP00000304370 | ENSP00000366557 |
| ENSP00000304370 | ENSP00000366607 |
| ENSP00000304370 | ENSP00000367835 |
| ENSP00000304370 | ENSP00000368565 |



|                 |                 |
|-----------------|-----------------|
| ENSP00000304370 | ENSP00000368881 |
| ENSP00000304370 | ENSP00000369695 |
| ENSP00000304370 | ENSP00000369887 |
| ENSP00000304370 | ENSP00000376973 |
| ENSP00000304370 | ENSP00000377262 |
| ENSP00000304370 | ENSP00000379607 |
| ENSP00000304370 | ENSP00000385903 |
| ENSP00000304370 | ENSP00000387006 |
| ENSP00000304370 | ENSP00000391432 |
| ENSP00000304370 | ENSP00000400591 |
| ENSP00000304370 | ENSP00000412566 |
| ENSP00000304370 | ENSP00000416959 |
| ENSP00000304437 | ENSP00000340820 |
| ENSP00000304437 | ENSP00000353375 |
| ENSP00000304437 | ENSP00000353508 |
| ENSP00000304447 | ENSP00000381863 |
| ENSP00000304500 | ENSP00000306106 |
| ENSP00000304500 | ENSP00000308496 |
| ENSP00000304500 | ENSP00000310596 |
| ENSP00000304500 | ENSP00000314036 |
| ENSP00000304500 | ENSP00000319341 |
| ENSP00000304500 | ENSP00000325002 |
| ENSP00000304500 | ENSP00000345528 |
| ENSP00000304500 | ENSP00000355968 |
| ENSP00000304500 | ENSP00000357048 |
| ENSP00000304500 | ENSP00000357998 |
| ENSP00000304500 | ENSP00000358831 |
| ENSP00000304500 | ENSP00000359000 |
| ENSP00000304500 | ENSP00000361057 |
| ENSP00000304500 | ENSP00000364188 |
| ENSP00000304500 | ENSP00000364813 |
| ENSP00000304500 | ENSP00000372857 |
| ENSP00000304500 | ENSP00000372883 |
| ENSP00000304500 | ENSP00000403345 |
| ENSP00000304500 | ENSP00000406280 |
| ENSP00000304500 | ENSP00000410758 |
| ENSP00000304500 | ENSP00000414006 |
| ENSP00000304500 | ENSP00000414634 |
| ENSP00000304544 | ENSP00000308236 |
| ENSP00000304592 | ENSP00000310129 |
| ENSP00000304592 | ENSP00000311344 |
| ENSP00000304592 | ENSP00000313420 |
| ENSP00000304592 | ENSP00000319977 |
| ENSP00000304592 | ENSP00000329466 |
| ENSP00000304592 | ENSP00000340019 |
| ENSP00000304592 | ENSP00000345681 |

|                 |                 |
|-----------------|-----------------|
| ENSP00000304592 | ENSP00000347979 |
| ENSP00000304592 | ENSP00000354347 |
| ENSP00000304592 | ENSP00000354742 |
| ENSP00000304592 | ENSP00000355759 |
| ENSP00000304592 | ENSP00000360532 |
| ENSP00000304592 | ENSP00000367923 |
| ENSP00000304592 | ENSP00000374467 |
| ENSP00000304592 | ENSP00000377446 |
| ENSP00000304592 | ENSP00000377527 |
| ENSP00000304592 | ENSP00000378180 |
| ENSP00000304592 | ENSP00000379607 |
| ENSP00000304592 | ENSP00000381031 |
| ENSP00000304592 | ENSP00000396704 |
| ENSP00000304593 | ENSP00000304704 |
| ENSP00000304593 | ENSP00000307208 |
| ENSP00000304593 | ENSP00000308944 |
| ENSP00000304593 | ENSP00000310448 |
| ENSP00000304593 | ENSP00000310521 |
| ENSP00000304593 | ENSP00000310596 |
| ENSP00000304593 | ENSP00000311665 |
| ENSP00000304593 | ENSP00000312244 |
| ENSP00000304593 | ENSP00000312697 |
| ENSP00000304593 | ENSP00000312778 |
| ENSP00000304593 | ENSP00000317156 |
| ENSP00000304593 | ENSP00000318313 |
| ENSP00000304593 | ENSP00000320566 |
| ENSP00000304593 | ENSP00000322242 |
| ENSP00000304593 | ENSP00000322579 |
| ENSP00000304593 | ENSP00000323302 |
| ENSP00000304593 | ENSP00000325677 |
| ENSP00000304593 | ENSP00000326806 |
| ENSP00000304593 | ENSP00000327716 |
| ENSP00000304593 | ENSP00000329933 |
| ENSP00000304593 | ENSP00000331310 |
| ENSP00000304593 | ENSP00000334188 |
| ENSP00000304593 | ENSP00000336842 |
| ENSP00000304593 | ENSP00000337405 |
| ENSP00000304593 | ENSP00000339090 |
| ENSP00000304593 | ENSP00000339449 |
| ENSP00000304593 | ENSP00000340271 |
| ENSP00000304593 | ENSP00000340896 |
| ENSP00000304593 | ENSP00000347602 |
| ENSP00000304593 | ENSP00000347719 |
| ENSP00000304593 | ENSP00000348069 |
| ENSP00000304593 | ENSP00000348129 |
| ENSP00000304593 | ENSP00000348551 |

|                 |                 |
|-----------------|-----------------|
| ENSP00000304593 | ENSP00000349213 |
| ENSP00000304593 | ENSP00000350512 |
| ENSP00000304593 | ENSP00000352738 |
| ENSP00000304593 | ENSP00000353622 |
| ENSP00000304593 | ENSP00000355013 |
| ENSP00000304593 | ENSP00000356405 |
| ENSP00000304593 | ENSP00000356641 |
| ENSP00000304593 | ENSP00000356774 |
| ENSP00000304593 | ENSP00000356989 |
| ENSP00000304593 | ENSP00000357887 |
| ENSP00000304593 | ENSP00000358064 |
| ENSP00000304593 | ENSP00000359518 |
| ENSP00000304593 | ENSP00000359818 |
| ENSP00000304593 | ENSP00000360116 |
| ENSP00000304593 | ENSP00000360473 |
| ENSP00000304593 | ENSP00000360515 |
| ENSP00000304593 | ENSP00000362166 |
| ENSP00000304593 | ENSP00000362532 |
| ENSP00000304593 | ENSP00000362900 |
| ENSP00000304593 | ENSP00000363313 |
| ENSP00000304593 | ENSP00000363734 |
| ENSP00000304593 | ENSP00000364929 |
| ENSP00000304593 | ENSP00000365025 |
| ENSP00000304593 | ENSP00000365439 |
| ENSP00000304593 | ENSP00000371475 |
| ENSP00000304593 | ENSP00000372694 |
| ENSP00000304593 | ENSP00000374280 |
| ENSP00000304593 | ENSP00000374529 |
| ENSP00000304593 | ENSP00000378165 |
| ENSP00000304593 | ENSP00000379217 |
| ENSP00000304593 | ENSP00000380460 |
| ENSP00000304593 | ENSP00000382562 |
| ENSP00000304593 | ENSP00000386759 |
| ENSP00000304593 | ENSP00000390475 |
| ENSP00000304593 | ENSP00000402240 |
| ENSP00000304593 | ENSP00000406293 |
| ENSP00000304593 | ENSP00000412319 |
| ENSP00000304593 | ENSP00000413405 |
| ENSP00000304593 | ENSP00000415678 |
| ENSP00000304604 | ENSP00000315465 |
| ENSP00000304604 | ENSP00000347206 |
| ENSP00000304604 | ENSP00000348877 |
| ENSP00000304604 | ENSP00000358301 |
| ENSP00000304604 | ENSP00000363163 |
| ENSP00000304604 | ENSP00000368824 |
| ENSP00000304604 | ENSP00000369400 |

|                 |                 |
|-----------------|-----------------|
| ENSP00000304604 | ENSP00000369816 |
| ENSP00000304604 | ENSP00000371341 |
| ENSP00000304604 | ENSP00000379457 |
| ENSP00000304604 | ENSP00000400258 |
| ENSP00000304604 | ENSP00000401435 |
| ENSP00000304668 | ENSP00000310448 |
| ENSP00000304668 | ENSP00000313490 |
| ENSP00000304668 | ENSP00000315925 |
| ENSP00000304668 | ENSP00000324122 |
| ENSP00000304668 | ENSP00000325448 |
| ENSP00000304668 | ENSP00000327070 |
| ENSP00000304668 | ENSP00000336702 |
| ENSP00000304668 | ENSP00000353098 |
| ENSP00000304668 | ENSP00000353575 |
| ENSP00000304668 | ENSP00000354125 |
| ENSP00000304668 | ENSP00000358563 |
| ENSP00000304668 | ENSP00000359345 |
| ENSP00000304668 | ENSP00000361982 |
| ENSP00000304668 | ENSP00000363397 |
| ENSP00000304668 | ENSP00000364119 |
| ENSP00000304668 | ENSP00000366746 |
| ENSP00000304668 | ENSP00000368686 |
| ENSP00000304668 | ENSP00000370258 |
| ENSP00000304668 | ENSP00000370589 |
| ENSP00000304668 | ENSP00000374399 |
| ENSP00000304668 | ENSP00000394869 |
| ENSP00000304668 | ENSP00000399511 |
| ENSP00000304668 | ENSP00000412553 |
| ENSP00000304668 | ENSP00000415316 |
| ENSP00000304668 | ENSP00000417229 |
| ENSP00000304676 | ENSP00000337396 |
| ENSP00000304676 | ENSP00000344666 |
| ENSP00000304676 | ENSP00000367972 |
| ENSP00000304689 | ENSP00000309555 |
| ENSP00000304689 | ENSP00000328940 |
| ENSP00000304689 | ENSP00000353622 |
| ENSP00000304689 | ENSP00000359988 |
| ENSP00000304704 | ENSP00000305524 |
| ENSP00000304704 | ENSP00000315791 |
| ENSP00000304704 | ENSP00000325377 |
| ENSP00000304704 | ENSP00000326514 |
| ENSP00000304704 | ENSP00000327487 |
| ENSP00000304704 | ENSP00000329029 |
| ENSP00000304704 | ENSP00000331817 |
| ENSP00000304704 | ENSP00000332444 |
| ENSP00000304704 | ENSP00000339245 |

|                 |                 |
|-----------------|-----------------|
| ENSP00000304704 | ENSP00000339353 |
| ENSP00000304704 | ENSP00000345096 |
| ENSP00000304704 | ENSP00000347329 |
| ENSP00000304704 | ENSP00000348010 |
| ENSP00000304704 | ENSP00000355299 |
| ENSP00000304704 | ENSP00000357887 |
| ENSP00000304704 | ENSP00000359531 |
| ENSP00000304704 | ENSP00000364289 |
| ENSP00000304704 | ENSP00000368165 |
| ENSP00000304704 | ENSP00000391774 |
| ENSP00000304704 | ENSP00000392859 |
| ENSP00000304707 | ENSP00000350132 |
| ENSP00000304802 | ENSP00000308546 |
| ENSP00000304802 | ENSP00000321636 |
| ENSP00000304802 | ENSP00000346577 |
| ENSP00000304802 | ENSP00000360532 |
| ENSP00000304802 | ENSP00000364929 |
| ENSP00000304802 | ENSP00000368927 |
| ENSP00000304802 | ENSP00000370150 |
| ENSP00000304802 | ENSP00000370151 |
| ENSP00000304802 | ENSP00000388330 |
| ENSP00000304802 | ENSP00000419370 |
| ENSP00000304803 | ENSP00000329466 |
| ENSP00000304803 | ENSP00000334813 |
| ENSP00000304803 | ENSP00000379607 |
| ENSP00000304822 | ENSP00000341030 |
| ENSP00000304822 | ENSP00000346340 |
| ENSP00000304822 | ENSP00000350512 |
| ENSP00000304854 | ENSP00000350249 |
| ENSP00000304854 | ENSP00000350512 |
| ENSP00000304854 | ENSP00000377496 |
| ENSP00000304903 | ENSP00000305721 |
| ENSP00000304903 | ENSP00000310448 |
| ENSP00000304903 | ENSP00000310596 |
| ENSP00000304903 | ENSP00000310723 |
| ENSP00000304903 | ENSP00000312981 |
| ENSP00000304903 | ENSP00000313171 |
| ENSP00000304903 | ENSP00000313674 |
| ENSP00000304903 | ENSP00000313829 |
| ENSP00000304903 | ENSP00000327704 |
| ENSP00000304903 | ENSP00000331087 |
| ENSP00000304903 | ENSP00000336606 |
| ENSP00000304903 | ENSP00000339090 |
| ENSP00000304903 | ENSP00000345530 |
| ENSP00000304903 | ENSP00000349748 |
| ENSP00000304903 | ENSP00000351492 |

|                 |                 |
|-----------------|-----------------|
| ENSP00000304903 | ENSP00000352668 |
| ENSP00000304903 | ENSP00000358490 |
| ENSP00000304903 | ENSP00000358497 |
| ENSP00000304903 | ENSP00000363313 |
| ENSP00000304903 | ENSP00000364847 |
| ENSP00000304903 | ENSP00000365891 |
| ENSP00000304903 | ENSP00000366607 |
| ENSP00000304903 | ENSP00000372689 |
| ENSP00000304903 | ENSP00000374529 |
| ENSP00000304903 | ENSP00000380336 |
| ENSP00000304903 | ENSP00000381031 |
| ENSP00000304903 | ENSP00000401566 |
| ENSP00000304903 | ENSP00000412566 |
| ENSP00000304903 | ENSP00000420405 |
| ENSP00000304908 | ENSP00000313921 |
| ENSP00000304908 | ENSP00000321259 |
| ENSP00000304908 | ENSP00000356785 |
| ENSP00000304908 | ENSP00000381293 |
| ENSP00000304915 | ENSP00000360730 |
| ENSP00000304941 | ENSP00000376827 |
| ENSP00000304945 | ENSP00000355809 |
| ENSP00000304987 | ENSP00000367104 |
| ENSP00000305133 | ENSP00000341208 |
| ENSP00000305133 | ENSP00000350757 |
| ENSP00000305133 | ENSP00000373700 |
| ENSP00000305161 | ENSP00000331288 |
| ENSP00000305161 | ENSP00000347836 |
| ENSP00000305200 | ENSP00000349932 |
| ENSP00000305230 | ENSP00000341947 |
| ENSP00000305230 | ENSP00000345917 |
| ENSP00000305255 | ENSP00000305810 |
| ENSP00000305255 | ENSP00000309457 |
| ENSP00000305255 | ENSP00000310521 |
| ENSP00000305255 | ENSP00000322775 |
| ENSP00000305255 | ENSP00000324628 |
| ENSP00000305255 | ENSP00000325421 |
| ENSP00000305255 | ENSP00000326534 |
| ENSP00000305255 | ENSP00000327650 |
| ENSP00000305255 | ENSP00000342136 |
| ENSP00000305255 | ENSP00000343435 |
| ENSP00000305255 | ENSP00000344055 |
| ENSP00000305255 | ENSP00000346466 |
| ENSP00000305255 | ENSP00000348215 |
| ENSP00000305255 | ENSP00000352021 |
| ENSP00000305255 | ENSP00000356146 |
| ENSP00000305255 | ENSP00000357048 |

|                 |                 |
|-----------------|-----------------|
| ENSP00000305255 | ENSP00000360183 |
| ENSP00000305255 | ENSP00000361245 |
| ENSP00000305255 | ENSP00000362399 |
| ENSP00000305255 | ENSP00000369810 |
| ENSP00000305255 | ENSP00000379933 |
| ENSP00000305255 | ENSP00000381293 |
| ENSP00000305255 | ENSP00000389934 |
| ENSP00000305255 | ENSP00000390783 |
| ENSP00000305255 | ENSP00000401435 |
| ENSP00000305255 | ENSP00000418661 |
| ENSP00000305422 | ENSP00000312150 |
| ENSP00000305422 | ENSP00000325690 |
| ENSP00000305422 | ENSP00000329357 |
| ENSP00000305422 | ENSP00000336790 |
| ENSP00000305422 | ENSP00000339957 |
| ENSP00000305422 | ENSP00000340671 |
| ENSP00000305422 | ENSP00000341208 |
| ENSP00000305422 | ENSP00000341551 |
| ENSP00000305422 | ENSP00000344352 |
| ENSP00000305422 | ENSP00000345341 |
| ENSP00000305422 | ENSP00000348551 |
| ENSP00000305422 | ENSP00000351926 |
| ENSP00000305422 | ENSP00000352514 |
| ENSP00000305422 | ENSP00000353622 |
| ENSP00000305422 | ENSP00000356595 |
| ENSP00000305422 | ENSP00000357047 |
| ENSP00000305422 | ENSP00000358994 |
| ENSP00000305422 | ENSP00000359531 |
| ENSP00000305422 | ENSP00000365439 |
| ENSP00000305422 | ENSP00000381840 |
| ENSP00000305422 | ENSP00000386165 |
| ENSP00000305422 | ENSP00000414187 |
| ENSP00000305442 | ENSP00000305459 |
| ENSP00000305442 | ENSP00000390783 |
| ENSP00000305459 | ENSP00000308496 |
| ENSP00000305459 | ENSP00000309163 |
| ENSP00000305459 | ENSP00000310003 |
| ENSP00000305459 | ENSP00000314499 |
| ENSP00000305459 | ENSP00000316990 |
| ENSP00000305459 | ENSP00000325677 |
| ENSP00000305459 | ENSP00000327716 |
| ENSP00000305459 | ENSP00000328079 |
| ENSP00000305459 | ENSP00000329419 |
| ENSP00000305459 | ENSP00000330408 |
| ENSP00000305459 | ENSP00000336724 |
| ENSP00000305459 | ENSP00000344055 |

|                 |                 |
|-----------------|-----------------|
| ENSP00000305459 | ENSP00000347408 |
| ENSP00000305459 | ENSP00000349877 |
| ENSP00000305459 | ENSP00000349887 |
| ENSP00000305459 | ENSP00000352708 |
| ENSP00000305459 | ENSP00000354519 |
| ENSP00000305459 | ENSP00000356146 |
| ENSP00000305459 | ENSP00000359067 |
| ENSP00000305459 | ENSP00000359518 |
| ENSP00000305459 | ENSP00000360183 |
| ENSP00000305459 | ENSP00000363313 |
| ENSP00000305459 | ENSP00000363349 |
| ENSP00000305459 | ENSP00000371546 |
| ENSP00000305459 | ENSP00000372720 |
| ENSP00000305459 | ENSP00000377769 |
| ENSP00000305459 | ENSP00000381293 |
| ENSP00000305459 | ENSP00000390783 |
| ENSP00000305459 | ENSP00000396452 |
| ENSP00000305459 | ENSP00000397441 |
| ENSP00000305459 | ENSP00000402240 |
| ENSP00000305465 | ENSP00000318147 |
| ENSP00000305465 | ENSP00000321259 |
| ENSP00000305465 | ENSP00000379042 |
| ENSP00000305502 | ENSP00000360025 |
| ENSP00000305503 | ENSP00000308275 |
| ENSP00000305503 | ENSP00000308622 |
| ENSP00000305503 | ENSP00000310668 |
| ENSP00000305503 | ENSP00000315017 |
| ENSP00000305503 | ENSP00000316032 |
| ENSP00000305503 | ENSP00000318195 |
| ENSP00000305503 | ENSP00000327821 |
| ENSP00000305503 | ENSP00000341243 |
| ENSP00000305503 | ENSP00000343701 |
| ENSP00000305503 | ENSP00000344456 |
| ENSP00000305503 | ENSP00000344547 |
| ENSP00000305503 | ENSP00000346453 |
| ENSP00000305503 | ENSP00000348168 |
| ENSP00000305503 | ENSP00000352400 |
| ENSP00000305503 | ENSP00000352738 |
| ENSP00000305503 | ENSP00000356989 |
| ENSP00000305503 | ENSP00000357440 |
| ENSP00000305503 | ENSP00000357484 |
| ENSP00000305503 | ENSP00000360031 |
| ENSP00000305503 | ENSP00000360286 |
| ENSP00000305503 | ENSP00000362824 |
| ENSP00000305503 | ENSP00000365837 |
| ENSP00000305503 | ENSP00000368856 |



|                 |                 |
|-----------------|-----------------|
| ENSP00000305503 | ENSP00000369042 |
| ENSP00000305503 | ENSP00000371155 |
| ENSP00000305503 | ENSP00000372199 |
| ENSP00000305503 | ENSP00000379607 |
| ENSP00000305503 | ENSP00000382779 |
| ENSP00000305503 | ENSP00000396301 |
| ENSP00000305503 | ENSP00000402338 |
| ENSP00000305524 | ENSP00000323046 |
| ENSP00000305524 | ENSP00000327487 |
| ENSP00000305524 | ENSP00000332444 |
| ENSP00000305524 | ENSP00000355299 |
| ENSP00000305524 | ENSP00000361433 |
| ENSP00000305613 | ENSP00000311505 |
| ENSP00000305631 | ENSP00000313921 |
| ENSP00000305631 | ENSP00000350249 |
| ENSP00000305647 | ENSP00000309457 |
| ENSP00000305647 | ENSP00000310521 |
| ENSP00000305647 | ENSP00000314615 |
| ENSP00000305647 | ENSP00000326534 |
| ENSP00000305647 | ENSP00000327650 |
| ENSP00000305647 | ENSP00000329219 |
| ENSP00000305647 | ENSP00000337501 |
| ENSP00000305647 | ENSP00000344055 |
| ENSP00000305647 | ENSP00000369810 |
| ENSP00000305647 | ENSP00000381293 |
| ENSP00000305647 | ENSP00000389934 |
| ENSP00000305647 | ENSP00000390783 |
| ENSP00000305647 | ENSP00000417748 |
| ENSP00000305647 | ENSP00000418661 |
| ENSP00000305653 | ENSP00000306548 |
| ENSP00000305653 | ENSP00000312311 |
| ENSP00000305653 | ENSP00000325562 |
| ENSP00000305653 | ENSP00000329967 |
| ENSP00000305653 | ENSP00000338293 |
| ENSP00000305653 | ENSP00000339844 |
| ENSP00000305653 | ENSP00000341692 |
| ENSP00000305653 | ENSP00000354554 |
| ENSP00000305653 | ENSP00000356405 |
| ENSP00000305653 | ENSP00000362036 |
| ENSP00000305653 | ENSP00000362208 |
| ENSP00000305653 | ENSP00000367637 |
| ENSP00000305653 | ENSP00000368468 |
| ENSP00000305653 | ENSP00000377486 |
| ENSP00000305653 | ENSP00000386227 |
| ENSP00000305653 | ENSP00000420714 |
| ENSP00000305664 | ENSP00000355231 |

|                 |                 |
|-----------------|-----------------|
| ENSP00000305664 | ENSP00000383623 |
| ENSP00000305675 | ENSP00000339191 |
| ENSP00000305682 | ENSP00000317334 |
| ENSP00000305682 | ENSP00000340019 |
| ENSP00000305682 | ENSP00000359939 |
| ENSP00000305682 | ENSP00000376946 |
| ENSP00000305682 | ENSP00000420714 |
| ENSP00000305689 | ENSP00000314949 |
| ENSP00000305689 | ENSP00000322457 |
| ENSP00000305689 | ENSP00000325690 |
| ENSP00000305689 | ENSP00000328773 |
| ENSP00000305689 | ENSP00000369695 |
| ENSP00000305689 | ENSP00000380054 |
| ENSP00000305689 | ENSP00000381657 |
| ENSP00000305696 | ENSP00000368797 |
| ENSP00000305702 | ENSP00000307889 |
| ENSP00000305702 | ENSP00000309334 |
| ENSP00000305702 | ENSP00000309433 |
| ENSP00000305702 | ENSP00000311430 |
| ENSP00000305702 | ENSP00000314348 |
| ENSP00000305702 | ENSP00000315674 |
| ENSP00000305702 | ENSP00000317992 |
| ENSP00000305702 | ENSP00000320917 |
| ENSP00000305702 | ENSP00000322396 |
| ENSP00000305702 | ENSP00000323858 |
| ENSP00000305702 | ENSP00000328690 |
| ENSP00000305702 | ENSP00000332340 |
| ENSP00000305702 | ENSP00000338573 |
| ENSP00000305702 | ENSP00000338862 |
| ENSP00000305702 | ENSP00000339095 |
| ENSP00000305702 | ENSP00000339145 |
| ENSP00000305702 | ENSP00000339795 |
| ENSP00000305702 | ENSP00000342181 |
| ENSP00000305702 | ENSP00000345096 |
| ENSP00000305702 | ENSP00000346022 |
| ENSP00000305702 | ENSP00000346050 |
| ENSP00000305702 | ENSP00000346120 |
| ENSP00000305702 | ENSP00000346725 |
| ENSP00000305702 | ENSP00000347087 |
| ENSP00000305702 | ENSP00000352021 |
| ENSP00000305702 | ENSP00000352678 |
| ENSP00000305702 | ENSP00000353246 |
| ENSP00000305702 | ENSP00000354040 |
| ENSP00000305702 | ENSP00000355541 |
| ENSP00000305702 | ENSP00000355899 |
| ENSP00000305702 | ENSP00000358563 |

|                 |                 |
|-----------------|-----------------|
| ENSP00000305702 | ENSP00000358812 |
| ENSP00000305702 | ENSP00000359345 |
| ENSP00000305702 | ENSP00000359688 |
| ENSP00000305702 | ENSP00000360031 |
| ENSP00000305702 | ENSP00000360412 |
| ENSP00000305702 | ENSP00000360828 |
| ENSP00000305702 | ENSP00000361076 |
| ENSP00000305702 | ENSP00000362153 |
| ENSP00000305702 | ENSP00000362744 |
| ENSP00000305702 | ENSP00000363018 |
| ENSP00000305702 | ENSP00000363559 |
| ENSP00000305702 | ENSP00000363676 |
| ENSP00000305702 | ENSP00000363746 |
| ENSP00000305702 | ENSP00000363944 |
| ENSP00000305702 | ENSP00000364320 |
| ENSP00000305702 | ENSP00000365806 |
| ENSP00000305702 | ENSP00000366519 |
| ENSP00000305702 | ENSP00000368887 |
| ENSP00000305702 | ENSP00000370589 |
| ENSP00000305702 | ENSP00000372199 |
| ENSP00000305702 | ENSP00000372695 |
| ENSP00000305702 | ENSP00000373090 |
| ENSP00000305702 | ENSP00000374390 |
| ENSP00000305702 | ENSP00000375730 |
| ENSP00000305702 | ENSP00000377865 |
| ENSP00000305702 | ENSP00000379888 |
| ENSP00000305702 | ENSP00000380453 |
| ENSP00000305702 | ENSP00000380982 |
| ENSP00000305702 | ENSP00000382392 |
| ENSP00000305702 | ENSP00000389103 |
| ENSP00000305702 | ENSP00000392859 |
| ENSP00000305702 | ENSP00000394290 |
| ENSP00000305702 | ENSP00000399454 |
| ENSP00000305702 | ENSP00000402338 |
| ENSP00000305702 | ENSP00000402869 |
| ENSP00000305702 | ENSP00000403576 |
| ENSP00000305702 | ENSP00000405614 |
| ENSP00000305702 | ENSP00000409074 |
| ENSP00000305702 | ENSP00000409367 |
| ENSP00000305702 | ENSP00000411162 |
| ENSP00000305702 | ENSP00000417229 |
| ENSP00000305721 | ENSP00000348577 |
| ENSP00000305721 | ENSP00000358147 |
| ENSP00000305721 | ENSP00000362314 |
| ENSP00000305721 | ENSP00000384109 |
| ENSP00000305785 | ENSP00000325376 |

|                 |                 |
|-----------------|-----------------|
| ENSP00000305785 | ENSP00000346120 |
| ENSP00000305785 | ENSP00000346634 |
| ENSP00000305785 | ENSP00000354039 |
| ENSP00000305785 | ENSP00000355296 |
| ENSP00000305785 | ENSP00000370968 |
| ENSP00000305790 | ENSP00000310448 |
| ENSP00000305790 | ENSP00000311825 |
| ENSP00000305790 | ENSP00000311873 |
| ENSP00000305790 | ENSP00000315035 |
| ENSP00000305790 | ENSP00000315379 |
| ENSP00000305790 | ENSP00000315859 |
| ENSP00000305790 | ENSP00000316476 |
| ENSP00000305790 | ENSP00000318861 |
| ENSP00000305790 | ENSP00000319341 |
| ENSP00000305790 | ENSP00000323302 |
| ENSP00000305790 | ENSP00000324122 |
| ENSP00000305790 | ENSP00000326261 |
| ENSP00000305790 | ENSP00000326806 |
| ENSP00000305790 | ENSP00000331201 |
| ENSP00000305790 | ENSP00000332103 |
| ENSP00000305790 | ENSP00000333667 |
| ENSP00000305790 | ENSP00000334148 |
| ENSP00000305790 | ENSP00000334538 |
| ENSP00000305790 | ENSP00000335321 |
| ENSP00000305790 | ENSP00000337405 |
| ENSP00000305790 | ENSP00000339090 |
| ENSP00000305790 | ENSP00000341351 |
| ENSP00000305790 | ENSP00000342374 |
| ENSP00000305790 | ENSP00000343745 |
| ENSP00000305790 | ENSP00000345096 |
| ENSP00000305790 | ENSP00000347733 |
| ENSP00000305790 | ENSP00000348010 |
| ENSP00000305790 | ENSP00000351137 |
| ENSP00000305790 | ENSP00000351947 |
| ENSP00000305790 | ENSP00000352021 |
| ENSP00000305790 | ENSP00000352257 |
| ENSP00000305790 | ENSP00000354522 |
| ENSP00000305790 | ENSP00000356541 |
| ENSP00000305790 | ENSP00000357631 |
| ENSP00000305790 | ENSP00000358417 |
| ENSP00000305790 | ENSP00000358605 |
| ENSP00000305790 | ENSP00000360515 |
| ENSP00000305790 | ENSP00000360532 |
| ENSP00000305790 | ENSP00000360817 |
| ENSP00000305790 | ENSP00000360876 |
| ENSP00000305790 | ENSP00000361162 |

|                 |                 |
|-----------------|-----------------|
| ENSP00000305790 | ENSP00000361557 |
| ENSP00000305790 | ENSP00000361577 |
| ENSP00000305790 | ENSP00000362110 |
| ENSP00000305790 | ENSP00000362936 |
| ENSP00000305790 | ENSP00000363313 |
| ENSP00000305790 | ENSP00000364289 |
| ENSP00000305790 | ENSP00000365877 |
| ENSP00000305790 | ENSP00000366557 |
| ENSP00000305790 | ENSP00000366974 |
| ENSP00000305790 | ENSP00000368801 |
| ENSP00000305790 | ENSP00000372023 |
| ENSP00000305790 | ENSP00000379607 |
| ENSP00000305790 | ENSP00000382688 |
| ENSP00000305790 | ENSP00000386161 |
| ENSP00000305790 | ENSP00000387006 |
| ENSP00000305790 | ENSP00000391432 |
| ENSP00000305790 | ENSP00000400591 |
| ENSP00000305790 | ENSP00000408994 |
| ENSP00000305790 | ENSP00000412566 |
| ENSP00000305790 | ENSP00000416959 |
| ENSP00000305804 | ENSP00000331310 |
| ENSP00000305804 | ENSP00000417132 |
| ENSP00000305810 | ENSP00000311134 |
| ENSP00000305810 | ENSP00000317714 |
| ENSP00000305810 | ENSP00000324628 |
| ENSP00000305810 | ENSP00000355596 |
| ENSP00000305810 | ENSP00000356530 |
| ENSP00000305810 | ENSP00000362334 |
| ENSP00000305810 | ENSP00000366225 |
| ENSP00000305810 | ENSP00000374529 |
| ENSP00000305810 | ENSP00000381293 |
| ENSP00000305810 | ENSP00000383719 |
| ENSP00000305810 | ENSP00000390783 |
| ENSP00000305810 | ENSP00000401445 |
| ENSP00000305877 | ENSP00000370410 |
| ENSP00000305892 | ENSP00000327716 |
| ENSP00000305892 | ENSP00000377401 |
| ENSP00000305899 | ENSP00000349049 |
| ENSP00000305899 | ENSP00000366974 |
| ENSP00000305899 | ENSP00000371475 |
| ENSP00000305899 | ENSP00000372023 |
| ENSP00000305906 | ENSP00000352219 |
| ENSP00000305906 | ENSP00000369862 |
| ENSP00000305924 | ENSP00000307214 |
| ENSP00000305924 | ENSP00000318604 |
| ENSP00000305924 | ENSP00000347719 |

|                 |                 |
|-----------------|-----------------|
| ENSP00000305924 | ENSP00000348784 |
| ENSP00000305924 | ENSP00000371888 |
| ENSP00000305941 | ENSP00000346566 |
| ENSP00000305941 | ENSP00000351596 |
| ENSP00000305941 | ENSP00000356448 |
| ENSP00000305941 | ENSP00000382562 |
| ENSP00000305958 | ENSP00000310448 |
| ENSP00000305958 | ENSP00000318861 |
| ENSP00000305958 | ENSP00000321320 |
| ENSP00000305958 | ENSP00000327070 |
| ENSP00000305958 | ENSP00000336702 |
| ENSP00000305958 | ENSP00000339109 |
| ENSP00000305958 | ENSP00000344431 |
| ENSP00000305958 | ENSP00000346762 |
| ENSP00000305958 | ENSP00000350249 |
| ENSP00000305958 | ENSP00000357440 |
| ENSP00000305958 | ENSP00000358019 |
| ENSP00000305958 | ENSP00000362110 |
| ENSP00000305958 | ENSP00000362413 |
| ENSP00000305958 | ENSP00000366395 |
| ENSP00000305958 | ENSP00000367208 |
| ENSP00000305958 | ENSP00000371451 |
| ENSP00000305958 | ENSP00000371888 |
| ENSP00000305958 | ENSP00000377496 |
| ENSP00000305958 | ENSP00000391944 |
| ENSP00000305958 | ENSP00000394071 |
| ENSP00000305958 | ENSP00000397009 |
| ENSP00000305958 | ENSP00000404381 |
| ENSP00000305976 | ENSP00000311344 |
| ENSP00000305976 | ENSP00000334061 |
| ENSP00000305976 | ENSP00000343392 |
| ENSP00000305976 | ENSP00000377793 |
| ENSP00000305976 | ENSP00000378306 |
| ENSP00000306003 | ENSP00000358737 |
| ENSP00000306003 | ENSP00000362306 |
| ENSP00000306003 | ENSP00000370414 |
| ENSP00000306003 | ENSP00000389649 |
| ENSP00000306015 | ENSP00000313059 |
| ENSP00000306015 | ENSP00000361418 |
| ENSP00000306015 | ENSP00000367440 |
| ENSP00000306080 | ENSP00000311984 |
| ENSP00000306080 | ENSP00000312981 |
| ENSP00000306080 | ENSP00000314441 |
| ENSP00000306080 | ENSP00000321711 |
| ENSP00000306080 | ENSP00000322016 |
| ENSP00000306080 | ENSP00000324956 |

|                 |                 |
|-----------------|-----------------|
| ENSP00000306080 | ENSP00000326981 |
| ENSP00000306080 | ENSP00000339503 |
| ENSP00000306080 | ENSP00000339532 |
| ENSP00000306080 | ENSP00000341082 |
| ENSP00000306080 | ENSP00000346015 |
| ENSP00000306080 | ENSP00000358605 |
| ENSP00000306080 | ENSP00000358812 |
| ENSP00000306080 | ENSP00000362036 |
| ENSP00000306080 | ENSP00000367029 |
| ENSP00000306099 | ENSP00000306361 |
| ENSP00000306099 | ENSP00000321334 |
| ENSP00000306099 | ENSP00000370557 |
| ENSP00000306100 | ENSP00000307491 |
| ENSP00000306100 | ENSP00000363591 |
| ENSP00000306100 | ENSP00000420270 |
| ENSP00000306106 | ENSP00000307275 |
| ENSP00000306106 | ENSP00000346453 |
| ENSP00000306106 | ENSP00000354676 |
| ENSP00000306106 | ENSP00000354742 |
| ENSP00000306106 | ENSP00000355968 |
| ENSP00000306106 | ENSP00000358737 |
| ENSP00000306106 | ENSP00000361057 |
| ENSP00000306106 | ENSP00000364188 |
| ENSP00000306106 | ENSP00000370414 |
| ENSP00000306106 | ENSP00000385083 |
| ENSP00000306106 | ENSP00000389649 |
| ENSP00000306123 | ENSP00000308546 |
| ENSP00000306123 | ENSP00000308944 |
| ENSP00000306123 | ENSP00000312735 |
| ENSP00000306123 | ENSP00000324124 |
| ENSP00000306123 | ENSP00000339109 |
| ENSP00000306123 | ENSP00000340019 |
| ENSP00000306123 | ENSP00000342181 |
| ENSP00000306123 | ENSP00000350249 |
| ENSP00000306123 | ENSP00000354742 |
| ENSP00000306123 | ENSP00000365131 |
| ENSP00000306123 | ENSP00000404121 |
| ENSP00000306124 | ENSP00000306138 |
| ENSP00000306124 | ENSP00000309871 |
| ENSP00000306124 | ENSP00000321636 |
| ENSP00000306124 | ENSP00000321711 |
| ENSP00000306124 | ENSP00000323087 |
| ENSP00000306124 | ENSP00000323377 |
| ENSP00000306124 | ENSP00000329419 |
| ENSP00000306124 | ENSP00000330836 |
| ENSP00000306124 | ENSP00000331242 |

|                 |                 |
|-----------------|-----------------|
| ENSP00000306124 | ENSP00000333568 |
| ENSP00000306124 | ENSP00000336702 |
| ENSP00000306124 | ENSP00000338345 |
| ENSP00000306124 | ENSP00000341189 |
| ENSP00000306124 | ENSP00000344220 |
| ENSP00000306124 | ENSP00000347134 |
| ENSP00000306124 | ENSP00000347169 |
| ENSP00000306124 | ENSP00000348573 |
| ENSP00000306124 | ENSP00000349959 |
| ENSP00000306124 | ENSP00000350928 |
| ENSP00000306124 | ENSP00000354346 |
| ENSP00000306124 | ENSP00000355296 |
| ENSP00000306124 | ENSP00000356438 |
| ENSP00000306124 | ENSP00000360916 |
| ENSP00000306124 | ENSP00000361699 |
| ENSP00000306124 | ENSP00000364188 |
| ENSP00000306124 | ENSP00000370222 |
| ENSP00000306124 | ENSP00000371475 |
| ENSP00000306124 | ENSP00000374455 |
| ENSP00000306124 | ENSP00000376445 |
| ENSP00000306124 | ENSP00000378306 |
| ENSP00000306124 | ENSP00000382562 |
| ENSP00000306124 | ENSP00000391723 |
| ENSP00000306124 | ENSP00000396704 |
| ENSP00000306124 | ENSP00000397351 |
| ENSP00000306124 | ENSP00000415203 |
| ENSP00000306138 | ENSP00000339381 |
| ENSP00000306138 | ENSP00000349465 |
| ENSP00000306138 | ENSP00000355146 |
| ENSP00000306138 | ENSP00000357484 |
| ENSP00000306138 | ENSP00000388035 |
| ENSP00000306138 | ENSP00000406066 |
| ENSP00000306138 | ENSP00000411286 |
| ENSP00000306157 | ENSP00000339804 |
| ENSP00000306157 | ENSP00000341208 |
| ENSP00000306163 | ENSP00000312624 |
| ENSP00000306163 | ENSP00000356058 |
| ENSP00000306163 | ENSP00000378286 |
| ENSP00000306190 | ENSP00000340944 |
| ENSP00000306190 | ENSP00000356346 |
| ENSP00000306245 | ENSP00000306920 |
| ENSP00000306245 | ENSP00000307235 |
| ENSP00000306245 | ENSP00000311005 |
| ENSP00000306245 | ENSP00000313432 |
| ENSP00000306245 | ENSP00000318195 |
| ENSP00000306245 | ENSP00000319104 |



|                 |                 |
|-----------------|-----------------|
| ENSP00000306245 | ENSP00000321853 |
| ENSP00000306245 | ENSP00000325690 |
| ENSP00000306245 | ENSP00000327048 |
| ENSP00000306245 | ENSP00000330343 |
| ENSP00000306245 | ENSP00000336790 |
| ENSP00000306245 | ENSP00000339495 |
| ENSP00000306245 | ENSP00000339801 |
| ENSP00000306245 | ENSP00000340671 |
| ENSP00000306245 | ENSP00000340823 |
| ENSP00000306245 | ENSP00000341243 |
| ENSP00000306245 | ENSP00000343745 |
| ENSP00000306245 | ENSP00000348168 |
| ENSP00000306245 | ENSP00000348551 |
| ENSP00000306245 | ENSP00000350681 |
| ENSP00000306245 | ENSP00000350894 |
| ENSP00000306245 | ENSP00000351894 |
| ENSP00000306245 | ENSP00000352514 |
| ENSP00000306245 | ENSP00000353344 |
| ENSP00000306245 | ENSP00000355866 |
| ENSP00000306245 | ENSP00000357283 |
| ENSP00000306245 | ENSP00000357440 |
| ENSP00000306245 | ENSP00000357494 |
| ENSP00000306245 | ENSP00000358335 |
| ENSP00000306245 | ENSP00000358854 |
| ENSP00000306245 | ENSP00000363763 |
| ENSP00000306245 | ENSP00000363812 |
| ENSP00000306245 | ENSP00000376611 |
| ENSP00000306245 | ENSP00000377969 |
| ENSP00000306245 | ENSP00000391944 |
| ENSP00000306245 | ENSP00000393286 |
| ENSP00000306245 | ENSP00000393870 |
| ENSP00000306245 | ENSP00000399968 |
| ENSP00000306245 | ENSP00000402590 |
| ENSP00000306245 | ENSP00000403536 |
| ENSP00000306245 | ENSP00000403817 |
| ENSP00000306245 | ENSP00000408994 |
| ENSP00000306344 | ENSP00000378350 |
| ENSP00000306361 | ENSP00000321853 |
| ENSP00000306361 | ENSP00000349208 |
| ENSP00000306361 | ENSP00000365175 |
| ENSP00000306361 | ENSP00000370557 |
| ENSP00000306361 | ENSP00000387477 |
| ENSP00000306361 | ENSP00000415363 |
| ENSP00000306425 | ENSP00000350512 |
| ENSP00000306425 | ENSP00000386759 |
| ENSP00000306449 | ENSP00000355865 |

|                 |                 |
|-----------------|-----------------|
| ENSP00000306449 | ENSP00000366395 |
| ENSP00000306473 | ENSP00000336868 |
| ENSP00000306473 | ENSP00000357565 |
| ENSP00000306473 | ENSP00000373272 |
| ENSP00000306473 | ENSP00000380921 |
| ENSP00000306477 | ENSP00000352706 |
| ENSP00000306477 | ENSP00000370023 |
| ENSP00000306523 | ENSP00000359206 |
| ENSP00000306523 | ENSP00000379144 |
| ENSP00000306528 | ENSP00000386134 |
| ENSP00000306548 | ENSP00000307889 |
| ENSP00000306548 | ENSP00000308275 |
| ENSP00000306548 | ENSP00000308897 |
| ENSP00000306548 | ENSP00000309334 |
| ENSP00000306548 | ENSP00000309830 |
| ENSP00000306548 | ENSP00000311028 |
| ENSP00000306548 | ENSP00000311430 |
| ENSP00000306548 | ENSP00000312311 |
| ENSP00000306548 | ENSP00000315017 |
| ENSP00000306548 | ENSP00000317376 |
| ENSP00000306548 | ENSP00000317992 |
| ENSP00000306548 | ENSP00000318646 |
| ENSP00000306548 | ENSP00000322419 |
| ENSP00000306548 | ENSP00000326981 |
| ENSP00000306548 | ENSP00000333401 |
| ENSP00000306548 | ENSP00000333837 |
| ENSP00000306548 | ENSP00000338862 |
| ENSP00000306548 | ENSP00000339095 |
| ENSP00000306548 | ENSP00000339795 |
| ENSP00000306548 | ENSP00000339845 |
| ENSP00000306548 | ENSP00000341082 |
| ENSP00000306548 | ENSP00000343741 |
| ENSP00000306548 | ENSP00000343745 |
| ENSP00000306548 | ENSP00000345156 |
| ENSP00000306548 | ENSP00000346015 |
| ENSP00000306548 | ENSP00000346022 |
| ENSP00000306548 | ENSP00000346027 |
| ENSP00000306548 | ENSP00000346037 |
| ENSP00000306548 | ENSP00000346050 |
| ENSP00000306548 | ENSP00000346088 |
| ENSP00000306548 | ENSP00000352821 |
| ENSP00000306548 | ENSP00000354040 |
| ENSP00000306548 | ENSP00000354525 |
| ENSP00000306548 | ENSP00000354739 |
| ENSP00000306548 | ENSP00000359345 |
| ENSP00000306548 | ENSP00000361076 |

|                 |                 |
|-----------------|-----------------|
| ENSP00000306548 | ENSP00000362744 |
| ENSP00000306548 | ENSP00000363018 |
| ENSP00000306548 | ENSP00000363676 |
| ENSP00000306548 | ENSP00000364320 |
| ENSP00000306548 | ENSP00000368565 |
| ENSP00000306548 | ENSP00000369042 |
| ENSP00000306548 | ENSP00000369757 |
| ENSP00000306548 | ENSP00000373363 |
| ENSP00000306548 | ENSP00000373404 |
| ENSP00000306548 | ENSP00000377486 |
| ENSP00000306548 | ENSP00000377640 |
| ENSP00000306548 | ENSP00000377865 |
| ENSP00000306548 | ENSP00000378160 |
| ENSP00000306548 | ENSP00000379888 |
| ENSP00000306548 | ENSP00000380156 |
| ENSP00000306548 | ENSP00000380982 |
| ENSP00000306548 | ENSP00000386717 |
| ENSP00000306548 | ENSP00000389103 |
| ENSP00000306548 | ENSP00000393241 |
| ENSP00000306548 | ENSP00000393393 |
| ENSP00000306548 | ENSP00000402338 |
| ENSP00000306548 | ENSP00000403175 |
| ENSP00000306548 | ENSP00000412583 |
| ENSP00000306548 | ENSP00000414321 |
| ENSP00000306548 | ENSP00000416110 |
| ENSP00000306548 | ENSP00000417602 |
| ENSP00000306561 | ENSP00000307853 |
| ENSP00000306561 | ENSP00000309572 |
| ENSP00000306561 | ENSP00000310520 |
| ENSP00000306561 | ENSP00000311873 |
| ENSP00000306561 | ENSP00000318977 |
| ENSP00000306561 | ENSP00000322570 |
| ENSP00000306561 | ENSP00000330343 |
| ENSP00000306561 | ENSP00000336606 |
| ENSP00000306561 | ENSP00000336712 |
| ENSP00000306561 | ENSP00000340305 |
| ENSP00000306561 | ENSP00000342026 |
| ENSP00000306561 | ENSP00000343392 |
| ENSP00000306561 | ENSP00000343701 |
| ENSP00000306561 | ENSP00000343745 |
| ENSP00000306561 | ENSP00000347232 |
| ENSP00000306561 | ENSP00000347978 |
| ENSP00000306561 | ENSP00000348089 |
| ENSP00000306561 | ENSP00000351284 |
| ENSP00000306561 | ENSP00000351697 |
| ENSP00000306561 | ENSP00000360116 |

|                 |                 |
|-----------------|-----------------|
| ENSP00000306561 | ENSP00000361310 |
| ENSP00000306561 | ENSP00000362105 |
| ENSP00000306561 | ENSP00000362441 |
| ENSP00000306561 | ENSP00000364126 |
| ENSP00000306561 | ENSP00000364270 |
| ENSP00000306561 | ENSP00000365811 |
| ENSP00000306561 | ENSP00000368349 |
| ENSP00000306561 | ENSP00000368438 |
| ENSP00000306561 | ENSP00000368646 |
| ENSP00000306561 | ENSP00000384048 |
| ENSP00000306561 | ENSP00000394649 |
| ENSP00000306561 | ENSP00000400806 |
| ENSP00000306561 | ENSP00000406868 |
| ENSP00000306561 | ENSP00000407047 |
| ENSP00000306574 | ENSP00000368797 |
| ENSP00000306627 | ENSP00000308496 |
| ENSP00000306627 | ENSP00000317468 |
| ENSP00000306627 | ENSP00000367299 |
| ENSP00000306627 | ENSP00000368140 |
| ENSP00000306627 | ENSP00000389399 |
| ENSP00000306627 | ENSP00000402935 |
| ENSP00000306682 | ENSP00000310596 |
| ENSP00000306682 | ENSP00000318195 |
| ENSP00000306682 | ENSP00000325863 |
| ENSP00000306682 | ENSP00000339845 |
| ENSP00000306682 | ENSP00000343190 |
| ENSP00000306682 | ENSP00000343741 |
| ENSP00000306682 | ENSP00000349205 |
| ENSP00000306682 | ENSP00000351015 |
| ENSP00000306682 | ENSP00000354522 |
| ENSP00000306682 | ENSP00000356263 |
| ENSP00000306682 | ENSP00000356530 |
| ENSP00000306682 | ENSP00000359345 |
| ENSP00000306682 | ENSP00000360268 |
| ENSP00000306682 | ENSP00000360532 |
| ENSP00000306682 | ENSP00000361064 |
| ENSP00000306682 | ENSP00000372023 |
| ENSP00000306682 | ENSP00000375986 |
| ENSP00000306682 | ENSP00000378306 |
| ENSP00000306682 | ENSP00000401445 |
| ENSP00000306682 | ENSP00000417281 |
| ENSP00000306697 | ENSP00000337838 |
| ENSP00000306697 | ENSP00000358301 |
| ENSP00000306734 | ENSP00000342026 |
| ENSP00000306754 | ENSP00000367972 |
| ENSP00000306788 | ENSP00000331201 |

|                 |                 |
|-----------------|-----------------|
| ENSP00000306817 | ENSP00000315931 |
| ENSP00000306817 | ENSP00000333019 |
| ENSP00000306817 | ENSP00000342056 |
| ENSP00000306817 | ENSP00000350249 |
| ENSP00000306817 | ENSP00000356290 |
| ENSP00000306817 | ENSP00000359976 |
| ENSP00000306817 | ENSP00000361965 |
| ENSP00000306817 | ENSP00000367615 |
| ENSP00000306817 | ENSP00000377496 |
| ENSP00000306822 | ENSP00000329623 |
| ENSP00000306822 | ENSP00000353059 |
| ENSP00000306864 | ENSP00000326366 |
| ENSP00000306864 | ENSP00000355896 |
| ENSP00000306894 | ENSP00000350283 |
| ENSP00000306894 | ENSP00000356641 |
| ENSP00000306894 | ENSP00000409346 |
| ENSP00000306900 | ENSP00000346067 |
| ENSP00000306906 | ENSP00000312735 |
| ENSP00000306906 | ENSP00000324124 |
| ENSP00000306906 | ENSP00000339377 |
| ENSP00000306906 | ENSP00000348632 |
| ENSP00000306906 | ENSP00000360116 |
| ENSP00000306906 | ENSP00000382250 |
| ENSP00000306906 | ENSP00000403852 |
| ENSP00000306906 | ENSP00000417587 |
| ENSP00000306920 | ENSP00000318921 |
| ENSP00000306920 | ENSP00000364782 |
| ENSP00000306920 | ENSP00000399309 |
| ENSP00000306920 | ENSP00000408957 |
| ENSP00000306983 | ENSP00000307684 |
| ENSP00000306983 | ENSP00000309555 |
| ENSP00000306983 | ENSP00000312244 |
| ENSP00000306983 | ENSP00000312735 |
| ENSP00000306983 | ENSP00000316114 |
| ENSP00000306983 | ENSP00000322579 |
| ENSP00000306983 | ENSP00000323720 |
| ENSP00000306983 | ENSP00000323858 |
| ENSP00000306983 | ENSP00000324444 |
| ENSP00000306983 | ENSP00000325677 |
| ENSP00000306983 | ENSP00000331310 |
| ENSP00000306983 | ENSP00000334148 |
| ENSP00000306983 | ENSP00000335044 |
| ENSP00000306983 | ENSP00000336842 |
| ENSP00000306983 | ENSP00000340271 |
| ENSP00000306983 | ENSP00000340823 |
| ENSP00000306983 | ENSP00000340896 |

|                 |                 |
|-----------------|-----------------|
| ENSP00000306983 | ENSP00000344537 |
| ENSP00000306983 | ENSP00000346453 |
| ENSP00000306983 | ENSP00000347345 |
| ENSP00000306983 | ENSP00000347602 |
| ENSP00000306983 | ENSP00000347733 |
| ENSP00000306983 | ENSP00000351697 |
| ENSP00000306983 | ENSP00000352121 |
| ENSP00000306983 | ENSP00000354633 |
| ENSP00000306983 | ENSP00000355051 |
| ENSP00000306983 | ENSP00000355205 |
| ENSP00000306983 | ENSP00000355720 |
| ENSP00000306983 | ENSP00000358854 |
| ENSP00000306983 | ENSP00000359290 |
| ENSP00000306983 | ENSP00000359531 |
| ENSP00000306983 | ENSP00000359837 |
| ENSP00000306983 | ENSP00000360515 |
| ENSP00000306983 | ENSP00000360532 |
| ENSP00000306983 | ENSP00000360621 |
| ENSP00000306983 | ENSP00000361465 |
| ENSP00000306983 | ENSP00000361998 |
| ENSP00000306983 | ENSP00000362068 |
| ENSP00000306983 | ENSP00000362166 |
| ENSP00000306983 | ENSP00000363779 |
| ENSP00000306983 | ENSP00000367406 |
| ENSP00000306983 | ENSP00000374213 |
| ENSP00000306983 | ENSP00000377969 |
| ENSP00000306983 | ENSP00000392617 |
| ENSP00000306983 | ENSP00000402338 |
| ENSP00000306983 | ENSP00000403852 |
| ENSP00000306983 | ENSP00000417281 |
| ENSP00000306983 | ENSP00000418734 |
| ENSP00000306999 | ENSP00000308699 |
| ENSP00000306999 | ENSP00000308944 |
| ENSP00000306999 | ENSP00000313171 |
| ENSP00000306999 | ENSP00000313851 |
| ENSP00000306999 | ENSP00000322570 |
| ENSP00000306999 | ENSP00000323439 |
| ENSP00000306999 | ENSP00000325017 |
| ENSP00000306999 | ENSP00000341382 |
| ENSP00000306999 | ENSP00000349049 |
| ENSP00000306999 | ENSP00000351697 |
| ENSP00000306999 | ENSP00000353332 |
| ENSP00000306999 | ENSP00000354720 |
| ENSP00000306999 | ENSP00000354957 |
| ENSP00000306999 | ENSP00000357965 |
| ENSP00000306999 | ENSP00000361310 |

|                 |                 |
|-----------------|-----------------|
| ENSP00000306999 | ENSP00000365877 |
| ENSP00000306999 | ENSP00000368349 |
| ENSP00000306999 | ENSP00000368438 |
| ENSP00000306999 | ENSP00000369411 |
| ENSP00000306999 | ENSP00000370151 |
| ENSP00000306999 | ENSP00000372689 |
| ENSP00000306999 | ENSP00000398824 |
| ENSP00000307004 | ENSP00000313420 |
| ENSP00000307004 | ENSP00000342011 |
| ENSP00000307004 | ENSP00000346050 |
| ENSP00000307004 | ENSP00000349393 |
| ENSP00000307004 | ENSP00000352257 |
| ENSP00000307004 | ENSP00000354522 |
| ENSP00000307004 | ENSP00000355759 |
| ENSP00000307004 | ENSP00000367787 |
| ENSP00000307004 | ENSP00000377769 |
| ENSP00000307004 | ENSP00000378132 |
| ENSP00000307023 | ENSP00000320566 |
| ENSP00000307023 | ENSP00000328720 |
| ENSP00000307023 | ENSP00000343535 |
| ENSP00000307023 | ENSP00000351113 |
| ENSP00000307023 | ENSP00000353622 |
| ENSP00000307023 | ENSP00000355205 |
| ENSP00000307023 | ENSP00000357887 |
| ENSP00000307023 | ENSP00000358105 |
| ENSP00000307023 | ENSP00000359531 |
| ENSP00000307023 | ENSP00000374213 |
| ENSP00000307023 | ENSP00000384313 |
| ENSP00000307046 | ENSP00000325136 |
| ENSP00000307046 | ENSP00000344468 |
| ENSP00000307046 | ENSP00000346839 |
| ENSP00000307046 | ENSP00000351015 |
| ENSP00000307046 | ENSP00000363763 |
| ENSP00000307046 | ENSP00000367408 |
| ENSP00000307046 | ENSP00000370935 |
| ENSP00000307046 | ENSP00000381098 |
| ENSP00000307077 | ENSP00000314441 |
| ENSP00000307077 | ENSP00000326579 |
| ENSP00000307077 | ENSP00000354673 |
| ENSP00000307077 | ENSP00000376268 |
| ENSP00000307134 | ENSP00000314153 |
| ENSP00000307134 | ENSP00000326366 |
| ENSP00000307134 | ENSP00000340944 |
| ENSP00000307134 | ENSP00000344456 |
| ENSP00000307134 | ENSP00000368190 |
| ENSP00000307143 | ENSP00000369757 |

|                 |                 |
|-----------------|-----------------|
| ENSP00000307188 | ENSP00000307567 |
| ENSP00000307188 | ENSP00000352928 |
| ENSP00000307188 | ENSP00000358747 |
| ENSP00000307199 | ENSP00000370736 |
| ENSP00000307208 | ENSP00000308466 |
| ENSP00000307208 | ENSP00000312244 |
| ENSP00000307208 | ENSP00000319104 |
| ENSP00000307208 | ENSP00000325863 |
| ENSP00000307208 | ENSP00000329466 |
| ENSP00000307208 | ENSP00000329933 |
| ENSP00000307208 | ENSP00000331310 |
| ENSP00000307208 | ENSP00000332171 |
| ENSP00000307208 | ENSP00000332208 |
| ENSP00000307208 | ENSP00000333920 |
| ENSP00000307208 | ENSP00000334061 |
| ENSP00000307208 | ENSP00000341805 |
| ENSP00000307208 | ENSP00000343741 |
| ENSP00000307208 | ENSP00000343885 |
| ENSP00000307208 | ENSP00000345681 |
| ENSP00000307208 | ENSP00000347602 |
| ENSP00000307208 | ENSP00000347733 |
| ENSP00000307208 | ENSP00000351284 |
| ENSP00000307208 | ENSP00000351575 |
| ENSP00000307208 | ENSP00000353622 |
| ENSP00000307208 | ENSP00000356405 |
| ENSP00000307208 | ENSP00000357047 |
| ENSP00000307208 | ENSP00000357887 |
| ENSP00000307208 | ENSP00000360515 |
| ENSP00000307208 | ENSP00000362592 |
| ENSP00000307208 | ENSP00000374213 |
| ENSP00000307208 | ENSP00000374280 |
| ENSP00000307208 | ENSP00000374455 |
| ENSP00000307208 | ENSP00000376204 |
| ENSP00000307208 | ENSP00000379065 |
| ENSP00000307208 | ENSP00000381657 |
| ENSP00000307208 | ENSP00000384434 |
| ENSP00000307208 | ENSP00000384490 |
| ENSP00000307208 | ENSP00000386759 |
| ENSP00000307208 | ENSP00000397644 |
| ENSP00000307214 | ENSP00000311344 |
| ENSP00000307214 | ENSP00000333946 |
| ENSP00000307214 | ENSP00000351885 |
| ENSP00000307214 | ENSP00000355517 |
| ENSP00000307214 | ENSP00000356257 |
| ENSP00000307214 | ENSP00000379908 |
| ENSP00000307214 | ENSP00000381198 |



|                 |                 |
|-----------------|-----------------|
| ENSP00000307214 | ENSP00000383402 |
| ENSP00000307214 | ENSP00000394085 |
| ENSP00000307214 | ENSP00000414670 |
| ENSP00000307214 | ENSP00000417963 |
| ENSP00000307218 | ENSP00000345530 |
| ENSP00000307218 | ENSP00000361014 |
| ENSP00000307218 | ENSP00000417763 |
| ENSP00000307235 | ENSP00000318944 |
| ENSP00000307235 | ENSP00000325794 |
| ENSP00000307235 | ENSP00000342755 |
| ENSP00000307235 | ENSP00000344352 |
| ENSP00000307235 | ENSP00000356641 |
| ENSP00000307235 | ENSP00000358854 |
| ENSP00000307260 | ENSP00000344220 |
| ENSP00000307272 | ENSP00000312150 |
| ENSP00000307272 | ENSP00000318313 |
| ENSP00000307272 | ENSP00000318604 |
| ENSP00000307272 | ENSP00000325677 |
| ENSP00000307272 | ENSP00000327070 |
| ENSP00000307272 | ENSP00000341243 |
| ENSP00000307272 | ENSP00000341698 |
| ENSP00000307272 | ENSP00000346437 |
| ENSP00000307272 | ENSP00000346453 |
| ENSP00000307272 | ENSP00000348784 |
| ENSP00000307272 | ENSP00000349959 |
| ENSP00000307272 | ENSP00000354125 |
| ENSP00000307272 | ENSP00000354558 |
| ENSP00000307272 | ENSP00000356807 |
| ENSP00000307272 | ENSP00000359567 |
| ENSP00000307272 | ENSP00000361009 |
| ENSP00000307272 | ENSP00000362221 |
| ENSP00000307272 | ENSP00000362314 |
| ENSP00000307272 | ENSP00000362608 |
| ENSP00000307272 | ENSP00000362688 |
| ENSP00000307272 | ENSP00000362900 |
| ENSP00000307272 | ENSP00000364486 |
| ENSP00000307272 | ENSP00000365891 |
| ENSP00000307272 | ENSP00000366843 |
| ENSP00000307272 | ENSP00000369757 |
| ENSP00000307272 | ENSP00000371888 |
| ENSP00000307272 | ENSP00000376445 |
| ENSP00000307272 | ENSP00000379093 |
| ENSP00000307272 | ENSP00000384313 |
| ENSP00000307275 | ENSP00000331201 |
| ENSP00000307275 | ENSP00000345530 |
| ENSP00000307275 | ENSP00000346453 |

|                 |                 |
|-----------------|-----------------|
| ENSP00000307275 | ENSP00000354995 |
| ENSP00000307275 | ENSP00000355968 |
| ENSP00000307275 | ENSP00000364188 |
| ENSP00000307275 | ENSP00000370607 |
| ENSP00000307275 | ENSP00000374328 |
| ENSP00000307305 | ENSP00000344220 |
| ENSP00000307305 | ENSP00000359206 |
| ENSP00000307387 | ENSP00000310596 |
| ENSP00000307387 | ENSP00000311200 |
| ENSP00000307387 | ENSP00000314129 |
| ENSP00000307387 | ENSP00000317955 |
| ENSP00000307387 | ENSP00000319341 |
| ENSP00000307387 | ENSP00000321203 |
| ENSP00000307387 | ENSP00000321326 |
| ENSP00000307387 | ENSP00000329466 |
| ENSP00000307387 | ENSP00000331201 |
| ENSP00000307387 | ENSP00000341189 |
| ENSP00000307387 | ENSP00000343535 |
| ENSP00000307387 | ENSP00000345530 |
| ENSP00000307387 | ENSP00000348565 |
| ENSP00000307387 | ENSP00000349785 |
| ENSP00000307387 | ENSP00000353701 |
| ENSP00000307387 | ENSP00000354673 |
| ENSP00000307387 | ENSP00000354927 |
| ENSP00000307387 | ENSP00000356146 |
| ENSP00000307387 | ENSP00000358478 |
| ENSP00000307387 | ENSP00000360475 |
| ENSP00000307387 | ENSP00000360540 |
| ENSP00000307387 | ENSP00000362807 |
| ENSP00000307387 | ENSP00000365005 |
| ENSP00000307387 | ENSP00000366565 |
| ENSP00000307387 | ENSP00000367197 |
| ENSP00000307387 | ENSP00000370719 |
| ENSP00000307387 | ENSP00000380921 |
| ENSP00000307387 | ENSP00000417764 |
| ENSP00000307481 | ENSP00000311876 |
| ENSP00000307481 | ENSP00000339933 |
| ENSP00000307481 | ENSP00000366620 |
| ENSP00000307491 | ENSP00000309572 |
| ENSP00000307491 | ENSP00000310040 |
| ENSP00000307491 | ENSP00000310842 |
| ENSP00000307491 | ENSP00000313171 |
| ENSP00000307491 | ENSP00000314153 |
| ENSP00000307491 | ENSP00000315182 |
| ENSP00000307491 | ENSP00000315931 |
| ENSP00000307491 | ENSP00000319104 |

|                 |                 |
|-----------------|-----------------|
| ENSP00000307491 | ENSP00000324463 |
| ENSP00000307491 | ENSP00000325634 |
| ENSP00000307491 | ENSP00000332198 |
| ENSP00000307491 | ENSP00000333934 |
| ENSP00000307491 | ENSP00000340297 |
| ENSP00000307491 | ENSP00000343526 |
| ENSP00000307491 | ENSP00000344524 |
| ENSP00000307491 | ENSP00000347408 |
| ENSP00000307491 | ENSP00000349892 |
| ENSP00000307491 | ENSP00000350283 |
| ENSP00000307491 | ENSP00000358140 |
| ENSP00000307491 | ENSP00000358563 |
| ENSP00000307491 | ENSP00000362688 |
| ENSP00000307491 | ENSP00000364578 |
| ENSP00000307491 | ENSP00000366434 |
| ENSP00000307491 | ENSP00000368438 |
| ENSP00000307491 | ENSP00000374280 |
| ENSP00000307491 | ENSP00000384109 |
| ENSP00000307491 | ENSP00000384211 |
| ENSP00000307491 | ENSP00000406888 |
| ENSP00000307525 | ENSP00000308897 |
| ENSP00000307525 | ENSP00000310042 |
| ENSP00000307525 | ENSP00000310668 |
| ENSP00000307525 | ENSP00000312870 |
| ENSP00000307525 | ENSP00000313603 |
| ENSP00000307525 | ENSP00000316240 |
| ENSP00000307525 | ENSP00000325312 |
| ENSP00000307525 | ENSP00000338573 |
| ENSP00000307525 | ENSP00000344460 |
| ENSP00000307525 | ENSP00000345096 |
| ENSP00000307525 | ENSP00000348442 |
| ENSP00000307525 | ENSP00000351524 |
| ENSP00000307525 | ENSP00000352021 |
| ENSP00000307525 | ENSP00000352400 |
| ENSP00000307525 | ENSP00000354040 |
| ENSP00000307525 | ENSP00000354739 |
| ENSP00000307525 | ENSP00000356920 |
| ENSP00000307525 | ENSP00000359837 |
| ENSP00000307525 | ENSP00000360817 |
| ENSP00000307525 | ENSP00000361076 |
| ENSP00000307525 | ENSP00000362041 |
| ENSP00000307525 | ENSP00000362153 |
| ENSP00000307525 | ENSP00000362900 |
| ENSP00000307525 | ENSP00000363559 |
| ENSP00000307525 | ENSP00000364320 |
| ENSP00000307525 | ENSP00000365806 |

|                 |                 |
|-----------------|-----------------|
| ENSP00000307525 | ENSP00000366179 |
| ENSP00000307525 | ENSP00000368523 |
| ENSP00000307525 | ENSP00000368565 |
| ENSP00000307525 | ENSP00000371451 |
| ENSP00000307525 | ENSP00000373082 |
| ENSP00000307525 | ENSP00000373090 |
| ENSP00000307525 | ENSP00000377640 |
| ENSP00000307525 | ENSP00000380982 |
| ENSP00000307525 | ENSP00000389065 |
| ENSP00000307525 | ENSP00000389103 |
| ENSP00000307525 | ENSP00000394290 |
| ENSP00000307525 | ENSP00000403576 |
| ENSP00000307525 | ENSP00000409074 |
| ENSP00000307525 | ENSP00000409279 |
| ENSP00000307525 | ENSP00000409367 |
| ENSP00000307525 | ENSP00000411162 |
| ENSP00000307525 | ENSP00000411327 |
| ENSP00000307525 | ENSP00000412553 |
| ENSP00000307525 | ENSP00000413319 |
| ENSP00000307525 | ENSP00000413632 |
| ENSP00000307525 | ENSP00000414373 |
| ENSP00000307567 | ENSP00000307900 |
| ENSP00000307567 | ENSP00000310129 |
| ENSP00000307567 | ENSP00000312735 |
| ENSP00000307567 | ENSP00000314129 |
| ENSP00000307567 | ENSP00000323288 |
| ENSP00000307567 | ENSP00000339435 |
| ENSP00000307567 | ENSP00000342300 |
| ENSP00000307567 | ENSP00000346173 |
| ENSP00000307567 | ENSP00000349577 |
| ENSP00000307567 | ENSP00000351908 |
| ENSP00000307567 | ENSP00000355890 |
| ENSP00000307567 | ENSP00000360327 |
| ENSP00000307567 | ENSP00000362576 |
| ENSP00000307567 | ENSP00000364794 |
| ENSP00000307567 | ENSP00000364815 |
| ENSP00000307567 | ENSP00000365175 |
| ENSP00000307567 | ENSP00000369038 |
| ENSP00000307567 | ENSP00000369042 |
| ENSP00000307567 | ENSP00000373331 |
| ENSP00000307567 | ENSP00000377914 |
| ENSP00000307567 | ENSP00000379607 |
| ENSP00000307567 | ENSP00000387477 |
| ENSP00000307567 | ENSP00000401121 |
| ENSP00000307567 | ENSP00000402338 |
| ENSP00000307567 | ENSP00000403359 |

|                 |                 |
|-----------------|-----------------|
| ENSP00000307567 | ENSP00000415316 |
| ENSP00000307567 | ENSP00000415363 |
| ENSP00000307604 | ENSP00000345477 |
| ENSP00000307684 | ENSP00000309555 |
| ENSP00000307684 | ENSP00000310448 |
| ENSP00000307684 | ENSP00000313420 |
| ENSP00000307684 | ENSP00000316114 |
| ENSP00000307684 | ENSP00000322579 |
| ENSP00000307684 | ENSP00000324444 |
| ENSP00000307684 | ENSP00000335044 |
| ENSP00000307684 | ENSP00000336528 |
| ENSP00000307684 | ENSP00000336868 |
| ENSP00000307684 | ENSP00000341243 |
| ENSP00000307684 | ENSP00000343741 |
| ENSP00000307684 | ENSP00000344456 |
| ENSP00000307684 | ENSP00000344537 |
| ENSP00000307684 | ENSP00000347184 |
| ENSP00000307684 | ENSP00000347602 |
| ENSP00000307684 | ENSP00000347733 |
| ENSP00000307684 | ENSP00000348069 |
| ENSP00000307684 | ENSP00000348714 |
| ENSP00000307684 | ENSP00000350078 |
| ENSP00000307684 | ENSP00000350283 |
| ENSP00000307684 | ENSP00000350967 |
| ENSP00000307684 | ENSP00000351665 |
| ENSP00000307684 | ENSP00000352121 |
| ENSP00000307684 | ENSP00000352257 |
| ENSP00000307684 | ENSP00000353622 |
| ENSP00000307684 | ENSP00000354558 |
| ENSP00000307684 | ENSP00000358854 |
| ENSP00000307684 | ENSP00000359518 |
| ENSP00000307684 | ENSP00000359837 |
| ENSP00000307684 | ENSP00000360515 |
| ENSP00000307684 | ENSP00000361245 |
| ENSP00000307684 | ENSP00000361577 |
| ENSP00000307684 | ENSP00000361965 |
| ENSP00000307684 | ENSP00000361998 |
| ENSP00000307684 | ENSP00000365943 |
| ENSP00000307684 | ENSP00000366179 |
| ENSP00000307684 | ENSP00000368565 |
| ENSP00000307684 | ENSP00000369695 |
| ENSP00000307684 | ENSP00000373399 |
| ENSP00000307684 | ENSP00000377747 |
| ENSP00000307684 | ENSP00000385903 |
| ENSP00000307684 | ENSP00000386394 |
| ENSP00000307684 | ENSP00000392028 |

|                 |                 |
|-----------------|-----------------|
| ENSP00000307684 | ENSP00000396620 |
| ENSP00000307684 | ENSP00000396749 |
| ENSP00000307684 | ENSP00000397259 |
| ENSP00000307684 | ENSP00000402515 |
| ENSP00000307746 | ENSP00000338629 |
| ENSP00000307746 | ENSP00000344666 |
| ENSP00000307746 | ENSP00000365735 |
| ENSP00000307786 | ENSP00000309565 |
| ENSP00000307786 | ENSP00000317159 |
| ENSP00000307786 | ENSP00000317780 |
| ENSP00000307786 | ENSP00000326579 |
| ENSP00000307786 | ENSP00000326806 |
| ENSP00000307786 | ENSP00000329623 |
| ENSP00000307786 | ENSP00000331201 |
| ENSP00000307786 | ENSP00000332887 |
| ENSP00000307786 | ENSP00000338345 |
| ENSP00000307786 | ENSP00000341637 |
| ENSP00000307786 | ENSP00000341838 |
| ENSP00000307786 | ENSP00000347919 |
| ENSP00000307786 | ENSP00000350512 |
| ENSP00000307786 | ENSP00000353059 |
| ENSP00000307786 | ENSP00000354499 |
| ENSP00000307786 | ENSP00000354554 |
| ENSP00000307786 | ENSP00000354876 |
| ENSP00000307786 | ENSP00000354982 |
| ENSP00000307786 | ENSP00000355572 |
| ENSP00000307786 | ENSP00000357980 |
| ENSP00000307786 | ENSP00000359531 |
| ENSP00000307786 | ENSP00000361686 |
| ENSP00000307786 | ENSP00000364289 |
| ENSP00000307786 | ENSP00000365243 |
| ENSP00000307786 | ENSP00000367934 |
| ENSP00000307786 | ENSP00000377969 |
| ENSP00000307786 | ENSP00000387262 |
| ENSP00000307821 | ENSP00000311665 |
| ENSP00000307821 | ENSP00000321239 |
| ENSP00000307833 | ENSP00000350512 |
| ENSP00000307850 | ENSP00000317177 |
| ENSP00000307850 | ENSP00000341243 |
| ENSP00000307850 | ENSP00000342793 |
| ENSP00000307850 | ENSP00000347345 |
| ENSP00000307850 | ENSP00000347948 |
| ENSP00000307850 | ENSP00000357907 |
| ENSP00000307850 | ENSP00000358478 |
| ENSP00000307850 | ENSP00000359290 |
| ENSP00000307850 | ENSP00000366534 |

|                 |                 |
|-----------------|-----------------|
| ENSP00000307850 | ENSP00000381891 |
| ENSP00000307853 | ENSP00000308944 |
| ENSP00000307853 | ENSP00000309572 |
| ENSP00000307853 | ENSP00000310520 |
| ENSP00000307853 | ENSP00000310596 |
| ENSP00000307853 | ENSP00000313171 |
| ENSP00000307853 | ENSP00000317039 |
| ENSP00000307853 | ENSP00000317636 |
| ENSP00000307853 | ENSP00000321636 |
| ENSP00000307853 | ENSP00000322570 |
| ENSP00000307853 | ENSP00000323439 |
| ENSP00000307853 | ENSP00000323511 |
| ENSP00000307853 | ENSP00000325863 |
| ENSP00000307853 | ENSP00000328940 |
| ENSP00000307853 | ENSP00000336606 |
| ENSP00000307853 | ENSP00000337353 |
| ENSP00000307853 | ENSP00000339897 |
| ENSP00000307853 | ENSP00000340305 |
| ENSP00000307853 | ENSP00000340879 |
| ENSP00000307853 | ENSP00000341382 |
| ENSP00000307853 | ENSP00000341543 |
| ENSP00000307853 | ENSP00000343392 |
| ENSP00000307853 | ENSP00000343741 |
| ENSP00000307853 | ENSP00000343745 |
| ENSP00000307853 | ENSP00000345917 |
| ENSP00000307853 | ENSP00000347232 |
| ENSP00000307853 | ENSP00000347978 |
| ENSP00000307853 | ENSP00000348020 |
| ENSP00000307853 | ENSP00000349393 |
| ENSP00000307853 | ENSP00000351284 |
| ENSP00000307853 | ENSP00000351697 |
| ENSP00000307853 | ENSP00000352257 |
| ENSP00000307853 | ENSP00000353332 |
| ENSP00000307853 | ENSP00000353793 |
| ENSP00000307853 | ENSP00000354522 |
| ENSP00000307853 | ENSP00000354720 |
| ENSP00000307853 | ENSP00000354957 |
| ENSP00000307853 | ENSP00000358019 |
| ENSP00000307853 | ENSP00000358478 |
| ENSP00000307853 | ENSP00000360310 |
| ENSP00000307853 | ENSP00000360621 |
| ENSP00000307853 | ENSP00000360803 |
| ENSP00000307853 | ENSP00000361310 |
| ENSP00000307853 | ENSP00000364126 |
| ENSP00000307853 | ENSP00000364270 |
| ENSP00000307853 | ENSP00000365588 |

|                 |                 |
|-----------------|-----------------|
| ENSP00000307853 | ENSP00000367787 |
| ENSP00000307853 | ENSP00000368349 |
| ENSP00000307853 | ENSP00000368438 |
| ENSP00000307853 | ENSP00000369335 |
| ENSP00000307853 | ENSP00000369411 |
| ENSP00000307853 | ENSP00000370151 |
| ENSP00000307853 | ENSP00000370376 |
| ENSP00000307853 | ENSP00000371475 |
| ENSP00000307853 | ENSP00000372023 |
| ENSP00000307853 | ENSP00000373060 |
| ENSP00000307853 | ENSP00000375809 |
| ENSP00000307853 | ENSP00000381657 |
| ENSP00000307853 | ENSP00000384048 |
| ENSP00000307853 | ENSP00000387429 |
| ENSP00000307853 | ENSP00000394649 |
| ENSP00000307853 | ENSP00000396484 |
| ENSP00000307853 | ENSP00000396704 |
| ENSP00000307853 | ENSP00000402084 |
| ENSP00000307853 | ENSP00000404318 |
| ENSP00000307853 | ENSP00000406490 |
| ENSP00000307853 | ENSP00000406868 |
| ENSP00000307853 | ENSP00000409167 |
| ENSP00000307853 | ENSP00000415212 |
| ENSP00000307853 | ENSP00000416511 |
| ENSP00000307858 | ENSP00000353622 |
| ENSP00000307863 | ENSP00000308533 |
| ENSP00000307863 | ENSP00000309166 |
| ENSP00000307863 | ENSP00000310448 |
| ENSP00000307863 | ENSP00000310596 |
| ENSP00000307863 | ENSP00000310723 |
| ENSP00000307863 | ENSP00000311135 |
| ENSP00000307863 | ENSP00000313829 |
| ENSP00000307863 | ENSP00000315379 |
| ENSP00000307863 | ENSP00000315674 |
| ENSP00000307863 | ENSP00000315859 |
| ENSP00000307863 | ENSP00000316879 |
| ENSP00000307863 | ENSP00000318195 |
| ENSP00000307863 | ENSP00000318861 |
| ENSP00000307863 | ENSP00000319341 |
| ENSP00000307863 | ENSP00000321711 |
| ENSP00000307863 | ENSP00000322016 |
| ENSP00000307863 | ENSP00000325677 |
| ENSP00000307863 | ENSP00000326806 |
| ENSP00000307863 | ENSP00000329466 |
| ENSP00000307863 | ENSP00000331817 |
| ENSP00000307863 | ENSP00000331879 |



|                 |                 |
|-----------------|-----------------|
| ENSP00000307863 | ENSP00000334148 |
| ENSP00000307863 | ENSP00000335321 |
| ENSP00000307863 | ENSP00000337405 |
| ENSP00000307863 | ENSP00000339090 |
| ENSP00000307863 | ENSP00000340281 |
| ENSP00000307863 | ENSP00000342374 |
| ENSP00000307863 | ENSP00000344241 |
| ENSP00000307863 | ENSP00000345773 |
| ENSP00000307863 | ENSP00000347592 |
| ENSP00000307863 | ENSP00000348010 |
| ENSP00000307863 | ENSP00000349748 |
| ENSP00000307863 | ENSP00000351947 |
| ENSP00000307863 | ENSP00000352308 |
| ENSP00000307863 | ENSP00000352678 |
| ENSP00000307863 | ENSP00000352738 |
| ENSP00000307863 | ENSP00000354951 |
| ENSP00000307863 | ENSP00000357304 |
| ENSP00000307863 | ENSP00000357631 |
| ENSP00000307863 | ENSP00000358374 |
| ENSP00000307863 | ENSP00000359518 |
| ENSP00000307863 | ENSP00000359988 |
| ENSP00000307863 | ENSP00000360532 |
| ENSP00000307863 | ENSP00000361048 |
| ENSP00000307863 | ENSP00000361577 |
| ENSP00000307863 | ENSP00000362900 |
| ENSP00000307863 | ENSP00000362936 |
| ENSP00000307863 | ENSP00000363976 |
| ENSP00000307863 | ENSP00000364289 |
| ENSP00000307863 | ENSP00000365439 |
| ENSP00000307863 | ENSP00000366557 |
| ENSP00000307863 | ENSP00000366607 |
| ENSP00000307863 | ENSP00000366829 |
| ENSP00000307863 | ENSP00000366843 |
| ENSP00000307863 | ENSP00000369218 |
| ENSP00000307863 | ENSP00000370589 |
| ENSP00000307863 | ENSP00000371888 |
| ENSP00000307863 | ENSP00000376973 |
| ENSP00000307863 | ENSP00000377262 |
| ENSP00000307863 | ENSP00000379607 |
| ENSP00000307863 | ENSP00000379888 |
| ENSP00000307863 | ENSP00000386759 |
| ENSP00000307863 | ENSP00000387170 |
| ENSP00000307887 | ENSP00000356191 |
| ENSP00000307889 | ENSP00000308897 |
| ENSP00000307889 | ENSP00000309334 |
| ENSP00000307889 | ENSP00000309830 |

|                 |                 |
|-----------------|-----------------|
| ENSP00000307889 | ENSP00000311028 |
| ENSP00000307889 | ENSP00000311430 |
| ENSP00000307889 | ENSP00000314311 |
| ENSP00000307889 | ENSP00000314348 |
| ENSP00000307889 | ENSP00000317376 |
| ENSP00000307889 | ENSP00000318195 |
| ENSP00000307889 | ENSP00000318646 |
| ENSP00000307889 | ENSP00000322419 |
| ENSP00000307889 | ENSP00000327821 |
| ENSP00000307889 | ENSP00000329967 |
| ENSP00000307889 | ENSP00000337839 |
| ENSP00000307889 | ENSP00000338862 |
| ENSP00000307889 | ENSP00000339095 |
| ENSP00000307889 | ENSP00000339795 |
| ENSP00000307889 | ENSP00000345096 |
| ENSP00000307889 | ENSP00000345156 |
| ENSP00000307889 | ENSP00000346015 |
| ENSP00000307889 | ENSP00000346022 |
| ENSP00000307889 | ENSP00000346027 |
| ENSP00000307889 | ENSP00000346037 |
| ENSP00000307889 | ENSP00000346050 |
| ENSP00000307889 | ENSP00000346088 |
| ENSP00000307889 | ENSP00000346453 |
| ENSP00000307889 | ENSP00000346725 |
| ENSP00000307889 | ENSP00000347087 |
| ENSP00000307889 | ENSP00000352021 |
| ENSP00000307889 | ENSP00000352738 |
| ENSP00000307889 | ENSP00000354040 |
| ENSP00000307889 | ENSP00000354525 |
| ENSP00000307889 | ENSP00000354673 |
| ENSP00000307889 | ENSP00000354739 |
| ENSP00000307889 | ENSP00000359345 |
| ENSP00000307889 | ENSP00000360532 |
| ENSP00000307889 | ENSP00000361076 |
| ENSP00000307889 | ENSP00000362334 |
| ENSP00000307889 | ENSP00000362744 |
| ENSP00000307889 | ENSP00000362900 |
| ENSP00000307889 | ENSP00000363018 |
| ENSP00000307889 | ENSP00000363384 |
| ENSP00000307889 | ENSP00000363559 |
| ENSP00000307889 | ENSP00000363676 |
| ENSP00000307889 | ENSP00000364119 |
| ENSP00000307889 | ENSP00000364320 |
| ENSP00000307889 | ENSP00000369757 |
| ENSP00000307889 | ENSP00000370083 |
| ENSP00000307889 | ENSP00000370258 |

|                 |                 |
|-----------------|-----------------|
| ENSP00000307889 | ENSP00000370589 |
| ENSP00000307889 | ENSP00000373404 |
| ENSP00000307889 | ENSP00000375730 |
| ENSP00000307889 | ENSP00000377640 |
| ENSP00000307889 | ENSP00000377865 |
| ENSP00000307889 | ENSP00000378160 |
| ENSP00000307889 | ENSP00000379607 |
| ENSP00000307889 | ENSP00000379888 |
| ENSP00000307889 | ENSP00000380156 |
| ENSP00000307889 | ENSP00000386717 |
| ENSP00000307889 | ENSP00000389103 |
| ENSP00000307889 | ENSP00000391723 |
| ENSP00000307889 | ENSP00000392859 |
| ENSP00000307889 | ENSP00000393241 |
| ENSP00000307889 | ENSP00000393393 |
| ENSP00000307889 | ENSP00000402338 |
| ENSP00000307889 | ENSP00000403175 |
| ENSP00000307889 | ENSP00000412583 |
| ENSP00000307889 | ENSP00000414321 |
| ENSP00000307889 | ENSP00000416110 |
| ENSP00000307900 | ENSP00000312664 |
| ENSP00000307900 | ENSP00000312870 |
| ENSP00000307900 | ENSP00000317872 |
| ENSP00000307900 | ENSP00000340019 |
| ENSP00000307900 | ENSP00000345681 |
| ENSP00000307900 | ENSP00000352706 |
| ENSP00000307900 | ENSP00000354313 |
| ENSP00000307900 | ENSP00000354813 |
| ENSP00000307900 | ENSP00000355890 |
| ENSP00000307900 | ENSP00000361699 |
| ENSP00000307900 | ENSP00000361990 |
| ENSP00000307900 | ENSP00000364815 |
| ENSP00000307900 | ENSP00000371546 |
| ENSP00000307900 | ENSP00000373477 |
| ENSP00000307900 | ENSP00000379065 |
| ENSP00000307900 | ENSP00000384434 |
| ENSP00000307900 | ENSP00000385083 |
| ENSP00000307900 | ENSP00000387426 |
| ENSP00000307900 | ENSP00000396068 |
| ENSP00000307900 | ENSP00000401121 |
| ENSP00000307900 | ENSP00000403359 |
| ENSP00000307900 | ENSP00000415316 |
| ENSP00000307939 | ENSP00000310668 |
| ENSP00000307939 | ENSP00000352676 |
| ENSP00000308137 | ENSP00000410088 |
| ENSP00000308179 | ENSP00000310590 |

|                 |                 |
|-----------------|-----------------|
| ENSP00000308179 | ENSP00000311135 |
| ENSP00000308179 | ENSP00000314193 |
| ENSP00000308179 | ENSP00000315674 |
| ENSP00000308179 | ENSP00000321449 |
| ENSP00000308179 | ENSP00000326981 |
| ENSP00000308179 | ENSP00000327179 |
| ENSP00000308179 | ENSP00000328854 |
| ENSP00000308179 | ENSP00000329466 |
| ENSP00000308179 | ENSP00000339145 |
| ENSP00000308179 | ENSP00000348848 |
| ENSP00000308179 | ENSP00000353246 |
| ENSP00000308179 | ENSP00000354040 |
| ENSP00000308179 | ENSP00000355471 |
| ENSP00000308179 | ENSP00000355541 |
| ENSP00000308179 | ENSP00000360031 |
| ENSP00000308179 | ENSP00000363642 |
| ENSP00000308179 | ENSP00000363746 |
| ENSP00000308179 | ENSP00000366557 |
| ENSP00000308179 | ENSP00000370258 |
| ENSP00000308179 | ENSP00000370589 |
| ENSP00000308179 | ENSP00000371101 |
| ENSP00000308179 | ENSP00000372695 |
| ENSP00000308179 | ENSP00000379888 |
| ENSP00000308179 | ENSP00000384302 |
| ENSP00000308179 | ENSP00000396937 |
| ENSP00000308179 | ENSP00000399454 |
| ENSP00000308179 | ENSP00000402869 |
| ENSP00000308179 | ENSP00000405614 |
| ENSP00000308179 | ENSP00000410396 |
| ENSP00000308193 | ENSP00000337623 |
| ENSP00000308236 | ENSP00000348054 |
| ENSP00000308236 | ENSP00000366032 |
| ENSP00000308236 | ENSP00000370984 |
| ENSP00000308236 | ENSP00000384109 |
| ENSP00000308236 | ENSP00000419475 |
| ENSP00000308268 | ENSP00000315693 |
| ENSP00000308268 | ENSP00000318351 |
| ENSP00000308268 | ENSP00000343657 |
| ENSP00000308268 | ENSP00000360268 |
| ENSP00000308268 | ENSP00000367079 |
| ENSP00000308268 | ENSP00000370377 |
| ENSP00000308268 | ENSP00000384015 |
| ENSP00000308275 | ENSP00000308897 |
| ENSP00000308275 | ENSP00000312311 |
| ENSP00000308275 | ENSP00000315017 |
| ENSP00000308275 | ENSP00000324122 |

|                 |                 |
|-----------------|-----------------|
| ENSP00000308275 | ENSP00000333401 |
| ENSP00000308275 | ENSP00000347836 |
| ENSP00000308275 | ENSP00000350491 |
| ENSP00000308275 | ENSP00000351015 |
| ENSP00000308275 | ENSP00000360498 |
| ENSP00000308275 | ENSP00000370930 |
| ENSP00000308275 | ENSP00000377486 |
| ENSP00000308275 | ENSP00000379607 |
| ENSP00000308275 | ENSP00000417602 |
| ENSP00000308332 | ENSP00000324122 |
| ENSP00000308332 | ENSP00000327179 |
| ENSP00000308332 | ENSP00000331817 |
| ENSP00000308332 | ENSP00000355890 |
| ENSP00000308332 | ENSP00000356146 |
| ENSP00000308332 | ENSP00000358563 |
| ENSP00000308332 | ENSP00000358812 |
| ENSP00000308332 | ENSP00000361982 |
| ENSP00000308332 | ENSP00000366030 |
| ENSP00000308332 | ENSP00000370589 |
| ENSP00000308332 | ENSP00000402338 |
| ENSP00000308334 | ENSP00000358737 |
| ENSP00000308334 | ENSP00000367408 |
| ENSP00000308339 | ENSP00000346015 |
| ENSP00000308339 | ENSP00000347329 |
| ENSP00000308339 | ENSP00000355296 |
| ENSP00000308339 | ENSP00000356530 |
| ENSP00000308339 | ENSP00000401445 |
| ENSP00000308369 | ENSP00000334148 |
| ENSP00000308369 | ENSP00000341551 |
| ENSP00000308369 | ENSP00000357631 |
| ENSP00000308369 | ENSP00000360286 |
| ENSP00000308369 | ENSP00000362820 |
| ENSP00000308383 | ENSP00000363708 |
| ENSP00000308466 | ENSP00000325377 |
| ENSP00000308466 | ENSP00000352821 |
| ENSP00000308466 | ENSP00000367024 |
| ENSP00000308466 | ENSP00000380156 |
| ENSP00000308466 | ENSP00000390475 |
| ENSP00000308466 | ENSP00000391723 |
| ENSP00000308466 | ENSP00000392270 |
| ENSP00000308496 | ENSP00000314615 |
| ENSP00000308496 | ENSP00000327309 |
| ENSP00000308496 | ENSP00000330320 |
| ENSP00000308496 | ENSP00000336724 |
| ENSP00000308496 | ENSP00000344055 |
| ENSP00000308496 | ENSP00000355231 |

|                 |                 |
|-----------------|-----------------|
| ENSP00000308496 | ENSP00000356146 |
| ENSP00000308496 | ENSP00000360183 |
| ENSP00000308496 | ENSP00000377280 |
| ENSP00000308496 | ENSP00000377769 |
| ENSP00000308496 | ENSP00000379093 |
| ENSP00000308496 | ENSP00000389399 |
| ENSP00000308496 | ENSP00000397441 |
| ENSP00000308496 | ENSP00000401435 |
| ENSP00000308496 | ENSP00000402240 |
| ENSP00000308533 | ENSP00000311505 |
| ENSP00000308533 | ENSP00000311825 |
| ENSP00000308533 | ENSP00000315859 |
| ENSP00000308533 | ENSP00000342374 |
| ENSP00000308533 | ENSP00000356520 |
| ENSP00000308533 | ENSP00000358716 |
| ENSP00000308533 | ENSP00000361577 |
| ENSP00000308533 | ENSP00000362820 |
| ENSP00000308533 | ENSP00000362900 |
| ENSP00000308533 | ENSP00000370083 |
| ENSP00000308533 | ENSP00000370119 |
| ENSP00000308533 | ENSP00000400591 |
| ENSP00000308546 | ENSP00000309830 |
| ENSP00000308546 | ENSP00000310448 |
| ENSP00000308546 | ENSP00000310723 |
| ENSP00000308546 | ENSP00000311028 |
| ENSP00000308546 | ENSP00000312066 |
| ENSP00000308546 | ENSP00000312981 |
| ENSP00000308546 | ENSP00000314311 |
| ENSP00000308546 | ENSP00000315379 |
| ENSP00000308546 | ENSP00000318262 |
| ENSP00000308546 | ENSP00000318861 |
| ENSP00000308546 | ENSP00000324122 |
| ENSP00000308546 | ENSP00000328487 |
| ENSP00000308546 | ENSP00000328773 |
| ENSP00000308546 | ENSP00000331817 |
| ENSP00000308546 | ENSP00000341885 |
| ENSP00000308546 | ENSP00000342181 |
| ENSP00000308546 | ENSP00000342374 |
| ENSP00000308546 | ENSP00000343701 |
| ENSP00000308546 | ENSP00000346566 |
| ENSP00000308546 | ENSP00000347592 |
| ENSP00000308546 | ENSP00000348577 |
| ENSP00000308546 | ENSP00000352308 |
| ENSP00000308546 | ENSP00000354346 |
| ENSP00000308546 | ENSP00000354742 |
| ENSP00000308546 | ENSP00000355011 |

|                 |                 |
|-----------------|-----------------|
| ENSP00000308546 | ENSP00000355587 |
| ENSP00000308546 | ENSP00000355759 |
| ENSP00000308546 | ENSP00000356405 |
| ENSP00000308546 | ENSP00000356520 |
| ENSP00000308546 | ENSP00000358417 |
| ENSP00000308546 | ENSP00000361010 |
| ENSP00000308546 | ENSP00000361433 |
| ENSP00000308546 | ENSP00000362135 |
| ENSP00000308546 | ENSP00000362744 |
| ENSP00000308546 | ENSP00000362820 |
| ENSP00000308546 | ENSP00000363313 |
| ENSP00000308546 | ENSP00000363745 |
| ENSP00000308546 | ENSP00000365439 |
| ENSP00000308546 | ENSP00000369411 |
| ENSP00000308546 | ENSP00000370589 |
| ENSP00000308546 | ENSP00000371634 |
| ENSP00000308546 | ENSP00000375863 |
| ENSP00000308546 | ENSP00000376309 |
| ENSP00000308546 | ENSP00000377969 |
| ENSP00000308546 | ENSP00000404121 |
| ENSP00000308546 | ENSP00000412566 |
| ENSP00000308546 | ENSP00000414006 |
| ENSP00000308610 | ENSP00000310621 |
| ENSP00000308610 | ENSP00000311684 |
| ENSP00000308610 | ENSP00000312370 |
| ENSP00000308610 | ENSP00000317159 |
| ENSP00000308610 | ENSP00000327070 |
| ENSP00000308610 | ENSP00000335304 |
| ENSP00000308610 | ENSP00000336927 |
| ENSP00000308610 | ENSP00000353452 |
| ENSP00000308610 | ENSP00000379933 |
| ENSP00000308610 | ENSP00000387262 |
| ENSP00000308610 | ENSP00000409493 |
| ENSP00000308620 | ENSP00000341551 |
| ENSP00000308620 | ENSP00000343701 |
| ENSP00000308622 | ENSP00000310040 |
| ENSP00000308622 | ENSP00000310668 |
| ENSP00000308622 | ENSP00000316032 |
| ENSP00000308622 | ENSP00000323780 |
| ENSP00000308622 | ENSP00000327197 |
| ENSP00000308622 | ENSP00000336712 |
| ENSP00000308622 | ENSP00000337393 |
| ENSP00000308622 | ENSP00000346566 |
| ENSP00000308622 | ENSP00000352400 |
| ENSP00000308622 | ENSP00000353741 |
| ENSP00000308622 | ENSP00000354125 |

|                 |                 |
|-----------------|-----------------|
| ENSP00000308622 | ENSP00000360286 |
| ENSP00000308622 | ENSP00000363046 |
| ENSP00000308622 | ENSP00000370258 |
| ENSP00000308622 | ENSP00000371155 |
| ENSP00000308622 | ENSP00000377655 |
| ENSP00000308622 | ENSP00000382779 |
| ENSP00000308622 | ENSP00000394791 |
| ENSP00000308622 | ENSP00000402527 |
| ENSP00000308622 | ENSP00000417229 |
| ENSP00000308699 | ENSP00000312778 |
| ENSP00000308699 | ENSP00000313171 |
| ENSP00000308699 | ENSP00000322180 |
| ENSP00000308699 | ENSP00000322570 |
| ENSP00000308699 | ENSP00000326514 |
| ENSP00000308699 | ENSP00000329558 |
| ENSP00000308699 | ENSP00000335357 |
| ENSP00000308699 | ENSP00000341382 |
| ENSP00000308699 | ENSP00000341680 |
| ENSP00000308699 | ENSP00000342381 |
| ENSP00000308699 | ENSP00000343081 |
| ENSP00000308699 | ENSP00000343741 |
| ENSP00000308699 | ENSP00000348551 |
| ENSP00000308699 | ENSP00000348554 |
| ENSP00000308699 | ENSP00000348722 |
| ENSP00000308699 | ENSP00000353793 |
| ENSP00000308699 | ENSP00000354720 |
| ENSP00000308699 | ENSP00000354916 |
| ENSP00000308699 | ENSP00000358423 |
| ENSP00000308699 | ENSP00000361990 |
| ENSP00000308699 | ENSP00000368017 |
| ENSP00000308699 | ENSP00000369411 |
| ENSP00000308699 | ENSP00000417963 |
| ENSP00000308741 | ENSP00000314420 |
| ENSP00000308741 | ENSP00000347168 |
| ENSP00000308741 | ENSP00000350767 |
| ENSP00000308741 | ENSP00000355759 |
| ENSP00000308741 | ENSP00000366974 |
| ENSP00000308741 | ENSP00000367034 |
| ENSP00000308741 | ENSP00000404658 |
| ENSP00000308741 | ENSP00000417281 |
| ENSP00000308750 | ENSP00000343535 |
| ENSP00000308750 | ENSP00000349892 |
| ENSP00000308750 | ENSP00000355759 |
| ENSP00000308750 | ENSP00000356817 |
| ENSP00000308750 | ENSP00000361287 |
| ENSP00000308750 | ENSP00000369380 |



|                 |                 |
|-----------------|-----------------|
| ENSP00000308750 | ENSP00000373566 |
| ENSP00000308750 | ENSP00000396439 |
| ENSP00000308750 | ENSP00000418734 |
| ENSP00000308750 | ENSP00000419494 |
| ENSP00000308759 | ENSP00000323720 |
| ENSP00000308759 | ENSP00000391774 |
| ENSP00000308759 | ENSP00000420588 |
| ENSP00000308774 | ENSP00000333568 |
| ENSP00000308774 | ENSP00000339191 |
| ENSP00000308774 | ENSP00000341189 |
| ENSP00000308774 | ENSP00000341208 |
| ENSP00000308774 | ENSP00000341551 |
| ENSP00000308774 | ENSP00000354119 |
| ENSP00000308774 | ENSP00000362608 |
| ENSP00000308774 | ENSP00000365435 |
| ENSP00000308774 | ENSP00000365439 |
| ENSP00000308897 | ENSP00000309334 |
| ENSP00000308897 | ENSP00000309830 |
| ENSP00000308897 | ENSP00000311028 |
| ENSP00000308897 | ENSP00000312735 |
| ENSP00000308897 | ENSP00000315017 |
| ENSP00000308897 | ENSP00000317376 |
| ENSP00000308897 | ENSP00000318646 |
| ENSP00000308897 | ENSP00000322419 |
| ENSP00000308897 | ENSP00000323856 |
| ENSP00000308897 | ENSP00000326981 |
| ENSP00000308897 | ENSP00000327821 |
| ENSP00000308897 | ENSP00000331849 |
| ENSP00000308897 | ENSP00000333837 |
| ENSP00000308897 | ENSP00000339095 |
| ENSP00000308897 | ENSP00000339795 |
| ENSP00000308897 | ENSP00000339845 |
| ENSP00000308897 | ENSP00000341082 |
| ENSP00000308897 | ENSP00000341885 |
| ENSP00000308897 | ENSP00000343392 |
| ENSP00000308897 | ENSP00000343745 |
| ENSP00000308897 | ENSP00000345156 |
| ENSP00000308897 | ENSP00000346015 |
| ENSP00000308897 | ENSP00000346022 |
| ENSP00000308897 | ENSP00000346027 |
| ENSP00000308897 | ENSP00000346037 |
| ENSP00000308897 | ENSP00000346050 |
| ENSP00000308897 | ENSP00000346088 |
| ENSP00000308897 | ENSP00000354525 |
| ENSP00000308897 | ENSP00000356811 |
| ENSP00000308897 | ENSP00000359345 |

|                 |                 |
|-----------------|-----------------|
| ENSP00000308897 | ENSP00000361076 |
| ENSP00000308897 | ENSP00000362135 |
| ENSP00000308897 | ENSP00000362744 |
| ENSP00000308897 | ENSP00000363018 |
| ENSP00000308897 | ENSP00000363676 |
| ENSP00000308897 | ENSP00000364320 |
| ENSP00000308897 | ENSP00000368565 |
| ENSP00000308897 | ENSP00000369757 |
| ENSP00000308897 | ENSP00000370930 |
| ENSP00000308897 | ENSP00000373404 |
| ENSP00000308897 | ENSP00000375730 |
| ENSP00000308897 | ENSP00000377486 |
| ENSP00000308897 | ENSP00000377640 |
| ENSP00000308897 | ENSP00000377865 |
| ENSP00000308897 | ENSP00000378160 |
| ENSP00000308897 | ENSP00000379607 |
| ENSP00000308897 | ENSP00000379888 |
| ENSP00000308897 | ENSP00000380156 |
| ENSP00000308897 | ENSP00000386717 |
| ENSP00000308897 | ENSP00000388330 |
| ENSP00000308897 | ENSP00000389103 |
| ENSP00000308897 | ENSP00000393393 |
| ENSP00000308897 | ENSP00000402338 |
| ENSP00000308897 | ENSP00000403536 |
| ENSP00000308897 | ENSP00000414321 |
| ENSP00000308897 | ENSP00000417602 |
| ENSP00000308925 | ENSP00000370737 |
| ENSP00000308944 | ENSP00000309365 |
| ENSP00000308944 | ENSP00000309572 |
| ENSP00000308944 | ENSP00000310520 |
| ENSP00000308944 | ENSP00000310596 |
| ENSP00000308944 | ENSP00000311873 |
| ENSP00000308944 | ENSP00000313171 |
| ENSP00000308944 | ENSP00000314949 |
| ENSP00000308944 | ENSP00000315700 |
| ENSP00000308944 | ENSP00000317636 |
| ENSP00000308944 | ENSP00000321636 |
| ENSP00000308944 | ENSP00000323439 |
| ENSP00000308944 | ENSP00000325677 |
| ENSP00000308944 | ENSP00000325863 |
| ENSP00000308944 | ENSP00000327716 |
| ENSP00000308944 | ENSP00000334474 |
| ENSP00000308944 | ENSP00000334675 |
| ENSP00000308944 | ENSP00000336606 |
| ENSP00000308944 | ENSP00000339145 |
| ENSP00000308944 | ENSP00000339933 |

|                 |                 |
|-----------------|-----------------|
| ENSP00000308944 | ENSP00000340879 |
| ENSP00000308944 | ENSP00000342181 |
| ENSP00000308944 | ENSP00000343392 |
| ENSP00000308944 | ENSP00000343535 |
| ENSP00000308944 | ENSP00000343741 |
| ENSP00000308944 | ENSP00000346437 |
| ENSP00000308944 | ENSP00000347232 |
| ENSP00000308944 | ENSP00000347495 |
| ENSP00000308944 | ENSP00000347978 |
| ENSP00000308944 | ENSP00000348089 |
| ENSP00000308944 | ENSP00000350708 |
| ENSP00000308944 | ENSP00000351284 |
| ENSP00000308944 | ENSP00000351697 |
| ENSP00000308944 | ENSP00000353793 |
| ENSP00000308944 | ENSP00000354201 |
| ENSP00000308944 | ENSP00000355077 |
| ENSP00000308944 | ENSP00000355185 |
| ENSP00000308944 | ENSP00000357887 |
| ENSP00000308944 | ENSP00000358576 |
| ENSP00000308944 | ENSP00000360532 |
| ENSP00000308944 | ENSP00000361310 |
| ENSP00000308944 | ENSP00000364270 |
| ENSP00000308944 | ENSP00000367527 |
| ENSP00000308944 | ENSP00000368438 |
| ENSP00000308944 | ENSP00000368646 |
| ENSP00000308944 | ENSP00000368801 |
| ENSP00000308944 | ENSP00000369335 |
| ENSP00000308944 | ENSP00000370150 |
| ENSP00000308944 | ENSP00000370151 |
| ENSP00000308944 | ENSP00000370408 |
| ENSP00000308944 | ENSP00000371475 |
| ENSP00000308944 | ENSP00000372023 |
| ENSP00000308944 | ENSP00000374280 |
| ENSP00000308944 | ENSP00000380460 |
| ENSP00000308944 | ENSP00000381031 |
| ENSP00000308944 | ENSP00000381657 |
| ENSP00000308944 | ENSP00000402515 |
| ENSP00000308957 | ENSP00000350874 |
| ENSP00000309031 | ENSP00000331487 |
| ENSP00000309031 | ENSP00000346130 |
| ENSP00000309031 | ENSP00000346986 |
| ENSP00000309031 | ENSP00000360916 |
| ENSP00000309031 | ENSP00000363338 |
| ENSP00000309031 | ENSP00000379457 |
| ENSP00000309031 | ENSP00000386722 |
| ENSP00000309052 | ENSP00000347301 |

|                 |                 |
|-----------------|-----------------|
| ENSP00000309103 | ENSP00000313059 |
| ENSP00000309103 | ENSP00000322957 |
| ENSP00000309103 | ENSP00000329623 |
| ENSP00000309103 | ENSP00000338345 |
| ENSP00000309103 | ENSP00000347979 |
| ENSP00000309103 | ENSP00000352425 |
| ENSP00000309103 | ENSP00000358022 |
| ENSP00000309103 | ENSP00000362608 |
| ENSP00000309103 | ENSP00000363591 |
| ENSP00000309103 | ENSP00000370003 |
| ENSP00000309103 | ENSP00000381031 |
| ENSP00000309103 | ENSP00000389277 |
| ENSP00000309117 | ENSP00000317891 |
| ENSP00000309117 | ENSP00000317992 |
| ENSP00000309117 | ENSP00000327704 |
| ENSP00000309117 | ENSP00000354560 |
| ENSP00000309117 | ENSP00000354951 |
| ENSP00000309117 | ENSP00000359444 |
| ENSP00000309117 | ENSP00000360500 |
| ENSP00000309117 | ENSP00000364847 |
| ENSP00000309117 | ENSP00000365175 |
| ENSP00000309117 | ENSP00000366843 |
| ENSP00000309117 | ENSP00000387477 |
| ENSP00000309117 | ENSP00000397435 |
| ENSP00000309132 | ENSP00000329623 |
| ENSP00000309141 | ENSP00000315791 |
| ENSP00000309141 | ENSP00000320885 |
| ENSP00000309141 | ENSP00000331487 |
| ENSP00000309141 | ENSP00000333836 |
| ENSP00000309141 | ENSP00000348010 |
| ENSP00000309141 | ENSP00000357998 |
| ENSP00000309141 | ENSP00000366395 |
| ENSP00000309141 | ENSP00000379457 |
| ENSP00000309141 | ENSP00000383719 |
| ENSP00000309141 | ENSP00000387347 |
| ENSP00000309142 | ENSP00000310596 |
| ENSP00000309142 | ENSP00000313171 |
| ENSP00000309142 | ENSP00000314949 |
| ENSP00000309142 | ENSP00000319104 |
| ENSP00000309142 | ENSP00000341743 |
| ENSP00000309142 | ENSP00000351284 |
| ENSP00000309142 | ENSP00000354673 |
| ENSP00000309142 | ENSP00000356405 |
| ENSP00000309142 | ENSP00000360515 |
| ENSP00000309142 | ENSP00000368438 |
| ENSP00000309142 | ENSP00000369965 |

|                 |                 |
|-----------------|-----------------|
| ENSP00000309142 | ENSP00000372023 |
| ENSP00000309163 | ENSP00000310003 |
| ENSP00000309163 | ENSP00000310040 |
| ENSP00000309163 | ENSP00000314499 |
| ENSP00000309163 | ENSP00000328079 |
| ENSP00000309163 | ENSP00000329419 |
| ENSP00000309163 | ENSP00000343552 |
| ENSP00000309163 | ENSP00000356405 |
| ENSP00000309163 | ENSP00000360183 |
| ENSP00000309163 | ENSP00000360270 |
| ENSP00000309163 | ENSP00000361845 |
| ENSP00000309163 | ENSP00000390783 |
| ENSP00000309163 | ENSP00000397441 |
| ENSP00000309166 | ENSP00000324122 |
| ENSP00000309166 | ENSP00000325376 |
| ENSP00000309166 | ENSP00000332681 |
| ENSP00000309166 | ENSP00000356520 |
| ENSP00000309166 | ENSP00000360532 |
| ENSP00000309166 | ENSP00000365439 |
| ENSP00000309166 | ENSP00000366607 |
| ENSP00000309166 | ENSP00000366829 |
| ENSP00000309166 | ENSP00000367440 |
| ENSP00000309166 | ENSP00000375863 |
| ENSP00000309166 | ENSP00000379607 |
| ENSP00000309175 | ENSP00000313691 |
| ENSP00000309189 | ENSP00000389427 |
| ENSP00000309198 | ENSP00000309474 |
| ENSP00000309198 | ENSP00000310129 |
| ENSP00000309198 | ENSP00000348442 |
| ENSP00000309198 | ENSP00000362334 |
| ENSP00000309198 | ENSP00000366135 |
| ENSP00000309198 | ENSP00000379217 |
| ENSP00000309198 | ENSP00000418734 |
| ENSP00000309259 | ENSP00000356530 |
| ENSP00000309259 | ENSP00000361287 |
| ENSP00000309259 | ENSP00000383901 |
| ENSP00000309259 | ENSP00000401445 |
| ENSP00000309262 | ENSP00000313490 |
| ENSP00000309262 | ENSP00000337194 |
| ENSP00000309262 | ENSP00000386165 |
| ENSP00000309262 | ENSP00000413520 |
| ENSP00000309334 | ENSP00000309830 |
| ENSP00000309334 | ENSP00000311028 |
| ENSP00000309334 | ENSP00000311430 |
| ENSP00000309334 | ENSP00000314348 |
| ENSP00000309334 | ENSP00000317376 |

|                 |                 |
|-----------------|-----------------|
| ENSP00000309334 | ENSP00000317992 |
| ENSP00000309334 | ENSP00000318646 |
| ENSP00000309334 | ENSP00000322396 |
| ENSP00000309334 | ENSP00000322419 |
| ENSP00000309334 | ENSP00000323858 |
| ENSP00000309334 | ENSP00000326981 |
| ENSP00000309334 | ENSP00000328690 |
| ENSP00000309334 | ENSP00000329466 |
| ENSP00000309334 | ENSP00000337839 |
| ENSP00000309334 | ENSP00000338862 |
| ENSP00000309334 | ENSP00000339095 |
| ENSP00000309334 | ENSP00000339795 |
| ENSP00000309334 | ENSP00000345096 |
| ENSP00000309334 | ENSP00000345156 |
| ENSP00000309334 | ENSP00000346015 |
| ENSP00000309334 | ENSP00000346022 |
| ENSP00000309334 | ENSP00000346027 |
| ENSP00000309334 | ENSP00000346037 |
| ENSP00000309334 | ENSP00000346050 |
| ENSP00000309334 | ENSP00000346088 |
| ENSP00000309334 | ENSP00000346725 |
| ENSP00000309334 | ENSP00000347087 |
| ENSP00000309334 | ENSP00000354040 |
| ENSP00000309334 | ENSP00000354125 |
| ENSP00000309334 | ENSP00000354525 |
| ENSP00000309334 | ENSP00000354739 |
| ENSP00000309334 | ENSP00000355899 |
| ENSP00000309334 | ENSP00000358812 |
| ENSP00000309334 | ENSP00000359345 |
| ENSP00000309334 | ENSP00000360412 |
| ENSP00000309334 | ENSP00000360922 |
| ENSP00000309334 | ENSP00000361076 |
| ENSP00000309334 | ENSP00000362744 |
| ENSP00000309334 | ENSP00000363018 |
| ENSP00000309334 | ENSP00000363676 |
| ENSP00000309334 | ENSP00000364320 |
| ENSP00000309334 | ENSP00000366557 |
| ENSP00000309334 | ENSP00000368565 |
| ENSP00000309334 | ENSP00000369757 |
| ENSP00000309334 | ENSP00000370589 |
| ENSP00000309334 | ENSP00000373404 |
| ENSP00000309334 | ENSP00000375730 |
| ENSP00000309334 | ENSP00000377640 |
| ENSP00000309334 | ENSP00000377865 |
| ENSP00000309334 | ENSP00000378160 |
| ENSP00000309334 | ENSP00000379607 |

|                 |                 |
|-----------------|-----------------|
| ENSP00000309334 | ENSP00000379888 |
| ENSP00000309334 | ENSP00000380156 |
| ENSP00000309334 | ENSP00000380982 |
| ENSP00000309334 | ENSP00000386717 |
| ENSP00000309334 | ENSP00000389103 |
| ENSP00000309334 | ENSP00000392859 |
| ENSP00000309334 | ENSP00000393241 |
| ENSP00000309334 | ENSP00000393393 |
| ENSP00000309334 | ENSP00000402338 |
| ENSP00000309334 | ENSP00000403175 |
| ENSP00000309334 | ENSP00000412583 |
| ENSP00000309334 | ENSP00000414321 |
| ENSP00000309334 | ENSP00000416110 |
| ENSP00000309334 | ENSP00000417229 |
| ENSP00000309338 | ENSP00000340278 |
| ENSP00000309338 | ENSP00000376188 |
| ENSP00000309365 | ENSP00000318195 |
| ENSP00000309365 | ENSP00000347836 |
| ENSP00000309365 | ENSP00000352257 |
| ENSP00000309365 | ENSP00000355759 |
| ENSP00000309365 | ENSP00000369042 |
| ENSP00000309430 | ENSP00000334052 |
| ENSP00000309430 | ENSP00000347206 |
| ENSP00000309430 | ENSP00000351284 |
| ENSP00000309430 | ENSP00000359848 |
| ENSP00000309430 | ENSP00000374484 |
| ENSP00000309430 | ENSP00000397441 |
| ENSP00000309433 | ENSP00000311135 |
| ENSP00000309433 | ENSP00000312735 |
| ENSP00000309433 | ENSP00000314348 |
| ENSP00000309433 | ENSP00000314949 |
| ENSP00000309433 | ENSP00000322419 |
| ENSP00000309433 | ENSP00000329858 |
| ENSP00000309433 | ENSP00000331879 |
| ENSP00000309433 | ENSP00000333934 |
| ENSP00000309433 | ENSP00000339095 |
| ENSP00000309433 | ENSP00000346037 |
| ENSP00000309433 | ENSP00000346453 |
| ENSP00000309433 | ENSP00000346725 |
| ENSP00000309433 | ENSP00000353564 |
| ENSP00000309433 | ENSP00000353741 |
| ENSP00000309433 | ENSP00000354040 |
| ENSP00000309433 | ENSP00000354125 |
| ENSP00000309433 | ENSP00000356476 |
| ENSP00000309433 | ENSP00000358400 |
| ENSP00000309433 | ENSP00000358563 |

|                 |                 |
|-----------------|-----------------|
| ENSP00000309433 | ENSP00000358812 |
| ENSP00000309433 | ENSP00000359345 |
| ENSP00000309433 | ENSP00000360031 |
| ENSP00000309433 | ENSP00000360412 |
| ENSP00000309433 | ENSP00000361982 |
| ENSP00000309433 | ENSP00000362688 |
| ENSP00000309433 | ENSP00000366519 |
| ENSP00000309433 | ENSP00000366557 |
| ENSP00000309433 | ENSP00000368612 |
| ENSP00000309433 | ENSP00000369965 |
| ENSP00000309433 | ENSP00000374219 |
| ENSP00000309433 | ENSP00000377040 |
| ENSP00000309433 | ENSP00000377865 |
| ENSP00000309433 | ENSP00000377944 |
| ENSP00000309433 | ENSP00000382392 |
| ENSP00000309433 | ENSP00000389103 |
| ENSP00000309433 | ENSP00000403817 |
| ENSP00000309433 | ENSP00000417229 |
| ENSP00000309433 | ENSP00000419740 |
| ENSP00000309457 | ENSP00000310521 |
| ENSP00000309457 | ENSP00000313420 |
| ENSP00000309457 | ENSP00000326534 |
| ENSP00000309457 | ENSP00000327650 |
| ENSP00000309457 | ENSP00000331201 |
| ENSP00000309457 | ENSP00000339122 |
| ENSP00000309457 | ENSP00000344055 |
| ENSP00000309457 | ENSP00000347733 |
| ENSP00000309457 | ENSP00000353904 |
| ENSP00000309457 | ENSP00000354558 |
| ENSP00000309457 | ENSP00000359000 |
| ENSP00000309457 | ENSP00000360116 |
| ENSP00000309457 | ENSP00000360183 |
| ENSP00000309457 | ENSP00000360252 |
| ENSP00000309457 | ENSP00000362399 |
| ENSP00000309457 | ENSP00000365943 |
| ENSP00000309457 | ENSP00000369810 |
| ENSP00000309457 | ENSP00000390783 |
| ENSP00000309457 | ENSP00000402515 |
| ENSP00000309463 | ENSP00000315693 |
| ENSP00000309463 | ENSP00000319531 |
| ENSP00000309463 | ENSP00000356405 |
| ENSP00000309463 | ENSP00000366974 |
| ENSP00000309474 | ENSP00000309871 |
| ENSP00000309474 | ENSP00000309968 |
| ENSP00000309474 | ENSP00000310129 |
| ENSP00000309474 | ENSP00000310561 |



|                 |                 |
|-----------------|-----------------|
| ENSP00000309474 | ENSP00000311665 |
| ENSP00000309474 | ENSP00000314004 |
| ENSP00000309474 | ENSP00000314129 |
| ENSP00000309474 | ENSP00000320949 |
| ENSP00000309474 | ENSP00000321711 |
| ENSP00000309474 | ENSP00000325919 |
| ENSP00000309474 | ENSP00000329466 |
| ENSP00000309474 | ENSP00000335357 |
| ENSP00000309474 | ENSP00000340596 |
| ENSP00000309474 | ENSP00000341243 |
| ENSP00000309474 | ENSP00000347997 |
| ENSP00000309474 | ENSP00000348442 |
| ENSP00000309474 | ENSP00000350708 |
| ENSP00000309474 | ENSP00000351947 |
| ENSP00000309474 | ENSP00000354883 |
| ENSP00000309474 | ENSP00000356438 |
| ENSP00000309474 | ENSP00000357980 |
| ENSP00000309474 | ENSP00000360532 |
| ENSP00000309474 | ENSP00000361287 |
| ENSP00000309474 | ENSP00000361990 |
| ENSP00000309474 | ENSP00000362334 |
| ENSP00000309474 | ENSP00000364204 |
| ENSP00000309474 | ENSP00000369531 |
| ENSP00000309474 | ENSP00000370222 |
| ENSP00000309474 | ENSP00000370408 |
| ENSP00000309474 | ENSP00000371341 |
| ENSP00000309474 | ENSP00000381045 |
| ENSP00000309474 | ENSP00000381698 |
| ENSP00000309474 | ENSP00000384211 |
| ENSP00000309474 | ENSP00000386212 |
| ENSP00000309474 | ENSP00000396068 |
| ENSP00000309474 | ENSP00000396937 |
| ENSP00000309487 | ENSP00000374234 |
| ENSP00000309515 | ENSP00000350249 |
| ENSP00000309555 | ENSP00000312649 |
| ENSP00000309555 | ENSP00000316114 |
| ENSP00000309555 | ENSP00000322957 |
| ENSP00000309555 | ENSP00000325326 |
| ENSP00000309555 | ENSP00000326767 |
| ENSP00000309555 | ENSP00000329357 |
| ENSP00000309555 | ENSP00000329466 |
| ENSP00000309555 | ENSP00000331152 |
| ENSP00000309555 | ENSP00000333275 |
| ENSP00000309555 | ENSP00000337088 |
| ENSP00000309555 | ENSP00000337340 |
| ENSP00000309555 | ENSP00000339527 |

|                 |                 |
|-----------------|-----------------|
| ENSP00000309555 | ENSP00000340896 |
| ENSP00000309555 | ENSP00000342136 |
| ENSP00000309555 | ENSP00000346886 |
| ENSP00000309555 | ENSP00000351490 |
| ENSP00000309555 | ENSP00000353622 |
| ENSP00000309555 | ENSP00000359290 |
| ENSP00000309555 | ENSP00000359837 |
| ENSP00000309555 | ENSP00000361009 |
| ENSP00000309555 | ENSP00000362592 |
| ENSP00000309555 | ENSP00000362824 |
| ENSP00000309555 | ENSP00000364895 |
| ENSP00000309555 | ENSP00000366854 |
| ENSP00000309555 | ENSP00000368686 |
| ENSP00000309555 | ENSP00000368887 |
| ENSP00000309555 | ENSP00000369695 |
| ENSP00000309555 | ENSP00000377218 |
| ENSP00000309555 | ENSP00000379607 |
| ENSP00000309555 | ENSP00000380129 |
| ENSP00000309555 | ENSP00000384675 |
| ENSP00000309555 | ENSP00000385903 |
| ENSP00000309555 | ENSP00000395535 |
| ENSP00000309555 | ENSP00000412566 |
| ENSP00000309555 | ENSP00000417132 |
| ENSP00000309561 | ENSP00000347948 |
| ENSP00000309561 | ENSP00000397435 |
| ENSP00000309565 | ENSP00000317159 |
| ENSP00000309565 | ENSP00000317780 |
| ENSP00000309565 | ENSP00000331019 |
| ENSP00000309565 | ENSP00000332887 |
| ENSP00000309565 | ENSP00000352219 |
| ENSP00000309565 | ENSP00000354499 |
| ENSP00000309565 | ENSP00000354554 |
| ENSP00000309565 | ENSP00000354876 |
| ENSP00000309565 | ENSP00000354982 |
| ENSP00000309565 | ENSP00000355572 |
| ENSP00000309565 | ENSP00000356953 |
| ENSP00000309565 | ENSP00000360782 |
| ENSP00000309565 | ENSP00000367934 |
| ENSP00000309565 | ENSP00000387262 |
| ENSP00000309572 | ENSP00000311873 |
| ENSP00000309572 | ENSP00000313171 |
| ENSP00000309572 | ENSP00000317636 |
| ENSP00000309572 | ENSP00000318195 |
| ENSP00000309572 | ENSP00000318977 |
| ENSP00000309572 | ENSP00000323439 |
| ENSP00000309572 | ENSP00000332444 |

|                 |                 |
|-----------------|-----------------|
| ENSP00000309572 | ENSP00000333873 |
| ENSP00000309572 | ENSP00000338573 |
| ENSP00000309572 | ENSP00000340766 |
| ENSP00000309572 | ENSP00000340879 |
| ENSP00000309572 | ENSP00000341382 |
| ENSP00000309572 | ENSP00000343741 |
| ENSP00000309572 | ENSP00000347232 |
| ENSP00000309572 | ENSP00000347978 |
| ENSP00000309572 | ENSP00000348708 |
| ENSP00000309572 | ENSP00000349640 |
| ENSP00000309572 | ENSP00000350249 |
| ENSP00000309572 | ENSP00000351284 |
| ENSP00000309572 | ENSP00000352257 |
| ENSP00000309572 | ENSP00000354522 |
| ENSP00000309572 | ENSP00000354558 |
| ENSP00000309572 | ENSP00000355261 |
| ENSP00000309572 | ENSP00000358478 |
| ENSP00000309572 | ENSP00000358563 |
| ENSP00000309572 | ENSP00000363021 |
| ENSP00000309572 | ENSP00000369411 |
| ENSP00000309572 | ENSP00000370151 |
| ENSP00000309572 | ENSP00000374213 |
| ENSP00000309572 | ENSP00000380504 |
| ENSP00000309572 | ENSP00000392028 |
| ENSP00000309572 | ENSP00000402515 |
| ENSP00000309572 | ENSP00000417281 |
| ENSP00000309595 | ENSP00000320885 |
| ENSP00000309595 | ENSP00000330408 |
| ENSP00000309595 | ENSP00000343479 |
| ENSP00000309595 | ENSP00000345216 |
| ENSP00000309595 | ENSP00000345341 |
| ENSP00000309595 | ENSP00000348081 |
| ENSP00000309595 | ENSP00000349298 |
| ENSP00000309595 | ENSP00000368646 |
| ENSP00000309595 | ENSP00000374455 |
| ENSP00000309595 | ENSP00000393596 |
| ENSP00000309606 | ENSP00000340698 |
| ENSP00000309606 | ENSP00000347592 |
| ENSP00000309606 | ENSP00000348708 |
| ENSP00000309606 | ENSP00000361232 |
| ENSP00000309606 | ENSP00000361433 |
| ENSP00000309606 | ENSP00000362592 |
| ENSP00000309606 | ENSP00000364813 |
| ENSP00000309606 | ENSP00000378503 |
| ENSP00000309606 | ENSP00000414006 |
| ENSP00000309606 | ENSP00000414634 |

|                 |                 |
|-----------------|-----------------|
| ENSP00000309610 | ENSP00000340019 |
| ENSP00000309610 | ENSP00000356476 |
| ENSP00000309610 | ENSP00000365891 |
| ENSP00000309610 | ENSP00000382269 |
| ENSP00000309629 | ENSP00000318884 |
| ENSP00000309629 | ENSP00000322170 |
| ENSP00000309629 | ENSP00000326238 |
| ENSP00000309629 | ENSP00000333950 |
| ENSP00000309629 | ENSP00000336740 |
| ENSP00000309629 | ENSP00000338127 |
| ENSP00000309629 | ENSP00000342793 |
| ENSP00000309629 | ENSP00000348163 |
| ENSP00000309629 | ENSP00000348215 |
| ENSP00000309629 | ENSP00000350249 |
| ENSP00000309629 | ENSP00000350757 |
| ENSP00000309629 | ENSP00000354742 |
| ENSP00000309629 | ENSP00000359100 |
| ENSP00000309629 | ENSP00000365891 |
| ENSP00000309629 | ENSP00000369816 |
| ENSP00000309629 | ENSP00000379607 |
| ENSP00000309629 | ENSP00000379933 |
| ENSP00000309629 | ENSP00000380450 |
| ENSP00000309629 | ENSP00000381031 |
| ENSP00000309681 | ENSP00000336790 |
| ENSP00000309710 | ENSP00000349393 |
| ENSP00000309710 | ENSP00000364956 |
| ENSP00000309710 | ENSP00000366936 |
| ENSP00000309710 | ENSP00000419952 |
| ENSP00000309790 | ENSP00000329357 |
| ENSP00000309830 | ENSP00000311430 |
| ENSP00000309830 | ENSP00000312042 |
| ENSP00000309830 | ENSP00000314129 |
| ENSP00000309830 | ENSP00000322419 |
| ENSP00000309830 | ENSP00000329466 |
| ENSP00000309830 | ENSP00000335657 |
| ENSP00000309830 | ENSP00000338573 |
| ENSP00000309830 | ENSP00000339795 |
| ENSP00000309830 | ENSP00000342374 |
| ENSP00000309830 | ENSP00000345156 |
| ENSP00000309830 | ENSP00000346015 |
| ENSP00000309830 | ENSP00000346022 |
| ENSP00000309830 | ENSP00000346027 |
| ENSP00000309830 | ENSP00000346037 |
| ENSP00000309830 | ENSP00000346088 |
| ENSP00000309830 | ENSP00000352021 |
| ENSP00000309830 | ENSP00000352514 |

|                 |                 |
|-----------------|-----------------|
| ENSP00000309830 | ENSP00000354040 |
| ENSP00000309830 | ENSP00000354525 |
| ENSP00000309830 | ENSP00000354739 |
| ENSP00000309830 | ENSP00000359345 |
| ENSP00000309830 | ENSP00000361076 |
| ENSP00000309830 | ENSP00000362153 |
| ENSP00000309830 | ENSP00000362306 |
| ENSP00000309830 | ENSP00000362688 |
| ENSP00000309830 | ENSP00000362993 |
| ENSP00000309830 | ENSP00000363018 |
| ENSP00000309830 | ENSP00000363384 |
| ENSP00000309830 | ENSP00000363676 |
| ENSP00000309830 | ENSP00000364320 |
| ENSP00000309830 | ENSP00000364398 |
| ENSP00000309830 | ENSP00000365806 |
| ENSP00000309830 | ENSP00000373090 |
| ENSP00000309830 | ENSP00000373404 |
| ENSP00000309830 | ENSP00000375730 |
| ENSP00000309830 | ENSP00000377640 |
| ENSP00000309830 | ENSP00000377865 |
| ENSP00000309830 | ENSP00000378160 |
| ENSP00000309830 | ENSP00000379607 |
| ENSP00000309830 | ENSP00000379888 |
| ENSP00000309830 | ENSP00000380156 |
| ENSP00000309830 | ENSP00000386717 |
| ENSP00000309830 | ENSP00000389103 |
| ENSP00000309830 | ENSP00000392466 |
| ENSP00000309830 | ENSP00000393393 |
| ENSP00000309830 | ENSP00000394290 |
| ENSP00000309830 | ENSP00000400591 |
| ENSP00000309830 | ENSP00000402338 |
| ENSP00000309830 | ENSP00000403576 |
| ENSP00000309830 | ENSP00000409074 |
| ENSP00000309830 | ENSP00000409367 |
| ENSP00000309830 | ENSP00000411162 |
| ENSP00000309831 | ENSP00000358716 |
| ENSP00000309831 | ENSP00000370083 |
| ENSP00000309831 | ENSP00000407401 |
| ENSP00000309831 | ENSP00000412566 |
| ENSP00000309836 | ENSP00000368755 |
| ENSP00000309871 | ENSP00000322957 |
| ENSP00000309871 | ENSP00000323858 |
| ENSP00000309871 | ENSP00000331310 |
| ENSP00000309871 | ENSP00000339826 |
| ENSP00000309871 | ENSP00000339952 |
| ENSP00000309871 | ENSP00000347778 |

|                 |                 |
|-----------------|-----------------|
| ENSP00000309871 | ENSP00000360532 |
| ENSP00000309871 | ENSP00000362592 |
| ENSP00000309871 | ENSP00000375986 |
| ENSP00000309871 | ENSP00000377793 |
| ENSP00000309871 | ENSP00000379607 |
| ENSP00000309871 | ENSP00000380921 |
| ENSP00000309968 | ENSP00000345731 |
| ENSP00000310003 | ENSP00000361057 |
| ENSP00000310003 | ENSP00000397441 |
| ENSP00000310008 | ENSP00000343392 |
| ENSP00000310008 | ENSP00000382218 |
| ENSP00000310040 | ENSP00000316879 |
| ENSP00000310040 | ENSP00000325448 |
| ENSP00000310040 | ENSP00000329002 |
| ENSP00000310040 | ENSP00000336702 |
| ENSP00000310040 | ENSP00000337405 |
| ENSP00000310040 | ENSP00000339095 |
| ENSP00000310040 | ENSP00000340281 |
| ENSP00000310040 | ENSP00000341243 |
| ENSP00000310040 | ENSP00000354125 |
| ENSP00000310040 | ENSP00000354558 |
| ENSP00000310040 | ENSP00000354673 |
| ENSP00000310040 | ENSP00000357907 |
| ENSP00000310040 | ENSP00000358140 |
| ENSP00000310040 | ENSP00000358563 |
| ENSP00000310040 | ENSP00000362688 |
| ENSP00000310040 | ENSP00000364119 |
| ENSP00000310040 | ENSP00000365175 |
| ENSP00000310040 | ENSP00000369816 |
| ENSP00000310040 | ENSP00000379607 |
| ENSP00000310040 | ENSP00000384211 |
| ENSP00000310040 | ENSP00000401508 |
| ENSP00000310040 | ENSP00000416892 |
| ENSP00000310040 | ENSP00000417748 |
| ENSP00000310042 | ENSP00000310649 |
| ENSP00000310042 | ENSP00000320488 |
| ENSP00000310042 | ENSP00000325312 |
| ENSP00000310042 | ENSP00000337445 |
| ENSP00000310042 | ENSP00000338573 |
| ENSP00000310042 | ENSP00000343190 |
| ENSP00000310042 | ENSP00000346453 |
| ENSP00000310042 | ENSP00000351908 |
| ENSP00000310042 | ENSP00000356920 |
| ENSP00000310042 | ENSP00000361642 |
| ENSP00000310042 | ENSP00000362153 |
| ENSP00000310042 | ENSP00000362171 |

|                 |                 |
|-----------------|-----------------|
| ENSP00000310042 | ENSP00000363559 |
| ENSP00000310042 | ENSP00000365806 |
| ENSP00000310042 | ENSP00000369757 |
| ENSP00000310042 | ENSP00000371451 |
| ENSP00000310042 | ENSP00000373090 |
| ENSP00000310042 | ENSP00000374213 |
| ENSP00000310042 | ENSP00000377640 |
| ENSP00000310042 | ENSP00000381932 |
| ENSP00000310042 | ENSP00000384048 |
| ENSP00000310042 | ENSP00000394290 |
| ENSP00000310042 | ENSP00000403576 |
| ENSP00000310042 | ENSP00000409074 |
| ENSP00000310042 | ENSP00000409367 |
| ENSP00000310042 | ENSP00000411162 |
| ENSP00000310082 | ENSP00000327436 |
| ENSP00000310082 | ENSP00000329189 |
| ENSP00000310082 | ENSP00000336712 |
| ENSP00000310082 | ENSP00000346050 |
| ENSP00000310082 | ENSP00000351284 |
| ENSP00000310082 | ENSP00000369335 |
| ENSP00000310094 | ENSP00000360916 |
| ENSP00000310129 | ENSP00000310440 |
| ENSP00000310129 | ENSP00000311344 |
| ENSP00000310129 | ENSP00000311665 |
| ENSP00000310129 | ENSP00000311873 |
| ENSP00000310129 | ENSP00000314004 |
| ENSP00000310129 | ENSP00000314499 |
| ENSP00000310129 | ENSP00000318944 |
| ENSP00000310129 | ENSP00000319977 |
| ENSP00000310129 | ENSP00000321711 |
| ENSP00000310129 | ENSP00000325919 |
| ENSP00000310129 | ENSP00000329466 |
| ENSP00000310129 | ENSP00000329715 |
| ENSP00000310129 | ENSP00000333122 |
| ENSP00000310129 | ENSP00000334061 |
| ENSP00000310129 | ENSP00000337501 |
| ENSP00000310129 | ENSP00000341243 |
| ENSP00000310129 | ENSP00000344055 |
| ENSP00000310129 | ENSP00000347978 |
| ENSP00000310129 | ENSP00000348442 |
| ENSP00000310129 | ENSP00000348565 |
| ENSP00000310129 | ENSP00000350199 |
| ENSP00000310129 | ENSP00000350708 |
| ENSP00000310129 | ENSP00000353622 |
| ENSP00000310129 | ENSP00000353826 |
| ENSP00000310129 | ENSP00000355560 |

|                 |                 |
|-----------------|-----------------|
| ENSP00000310129 | ENSP00000355865 |
| ENSP00000310129 | ENSP00000355890 |
| ENSP00000310129 | ENSP00000356655 |
| ENSP00000310129 | ENSP00000360216 |
| ENSP00000310129 | ENSP00000360532 |
| ENSP00000310129 | ENSP00000360922 |
| ENSP00000310129 | ENSP00000362334 |
| ENSP00000310129 | ENSP00000362688 |
| ENSP00000310129 | ENSP00000364204 |
| ENSP00000310129 | ENSP00000365837 |
| ENSP00000310129 | ENSP00000366395 |
| ENSP00000310129 | ENSP00000370222 |
| ENSP00000310129 | ENSP00000370408 |
| ENSP00000310129 | ENSP00000370414 |
| ENSP00000310129 | ENSP00000372199 |
| ENSP00000310129 | ENSP00000375986 |
| ENSP00000310129 | ENSP00000376945 |
| ENSP00000310129 | ENSP00000382269 |
| ENSP00000310129 | ENSP00000384109 |
| ENSP00000310129 | ENSP00000384211 |
| ENSP00000310129 | ENSP00000396937 |
| ENSP00000310129 | ENSP00000403817 |
| ENSP00000310129 | ENSP00000417281 |
| ENSP00000310129 | ENSP00000417748 |
| ENSP00000310129 | ENSP00000418734 |
| ENSP00000310260 | ENSP00000311344 |
| ENSP00000310260 | ENSP00000312735 |
| ENSP00000310260 | ENSP00000314949 |
| ENSP00000310260 | ENSP00000316879 |
| ENSP00000310260 | ENSP00000318641 |
| ENSP00000310260 | ENSP00000324124 |
| ENSP00000310260 | ENSP00000326379 |
| ENSP00000310260 | ENSP00000327889 |
| ENSP00000310260 | ENSP00000340220 |
| ENSP00000310260 | ENSP00000348708 |
| ENSP00000310260 | ENSP00000355961 |
| ENSP00000310260 | ENSP00000358140 |
| ENSP00000310260 | ENSP00000360532 |
| ENSP00000310260 | ENSP00000362170 |
| ENSP00000310260 | ENSP00000364289 |
| ENSP00000310260 | ENSP00000381064 |
| ENSP00000310260 | ENSP00000385722 |
| ENSP00000310260 | ENSP00000398208 |
| ENSP00000310260 | ENSP00000414237 |
| ENSP00000310260 | ENSP00000418210 |
| ENSP00000310303 | ENSP00000384490 |



|                 |                 |
|-----------------|-----------------|
| ENSP00000310332 | ENSP00000349892 |
| ENSP00000310338 | ENSP00000326514 |
| ENSP00000310338 | ENSP00000366863 |
| ENSP00000310356 | ENSP00000317039 |
| ENSP00000310356 | ENSP00000321636 |
| ENSP00000310356 | ENSP00000347232 |
| ENSP00000310375 | ENSP00000353452 |
| ENSP00000310440 | ENSP00000317468 |
| ENSP00000310440 | ENSP00000318629 |
| ENSP00000310440 | ENSP00000330408 |
| ENSP00000310440 | ENSP00000331201 |
| ENSP00000310440 | ENSP00000343479 |
| ENSP00000310440 | ENSP00000345216 |
| ENSP00000310440 | ENSP00000348081 |
| ENSP00000310440 | ENSP00000356602 |
| ENSP00000310440 | ENSP00000366565 |
| ENSP00000310440 | ENSP00000367001 |
| ENSP00000310440 | ENSP00000367299 |
| ENSP00000310440 | ENSP00000368686 |
| ENSP00000310440 | ENSP00000374455 |
| ENSP00000310440 | ENSP00000378368 |
| ENSP00000310440 | ENSP00000391432 |
| ENSP00000310448 | ENSP00000310596 |
| ENSP00000310448 | ENSP00000310723 |
| ENSP00000310448 | ENSP00000312981 |
| ENSP00000310448 | ENSP00000313674 |
| ENSP00000310448 | ENSP00000315035 |
| ENSP00000310448 | ENSP00000315379 |
| ENSP00000310448 | ENSP00000315859 |
| ENSP00000310448 | ENSP00000318861 |
| ENSP00000310448 | ENSP00000319341 |
| ENSP00000310448 | ENSP00000320566 |
| ENSP00000310448 | ENSP00000324122 |
| ENSP00000310448 | ENSP00000324274 |
| ENSP00000310448 | ENSP00000324573 |
| ENSP00000310448 | ENSP00000326477 |
| ENSP00000310448 | ENSP00000326806 |
| ENSP00000310448 | ENSP00000328690 |
| ENSP00000310448 | ENSP00000329466 |
| ENSP00000310448 | ENSP00000330343 |
| ENSP00000310448 | ENSP00000332103 |
| ENSP00000310448 | ENSP00000335321 |
| ENSP00000310448 | ENSP00000336842 |
| ENSP00000310448 | ENSP00000337405 |
| ENSP00000310448 | ENSP00000339090 |
| ENSP00000310448 | ENSP00000340271 |

|                 |                 |
|-----------------|-----------------|
| ENSP00000310448 | ENSP00000342374 |
| ENSP00000310448 | ENSP00000344241 |
| ENSP00000310448 | ENSP00000346986 |
| ENSP00000310448 | ENSP00000348010 |
| ENSP00000310448 | ENSP00000351492 |
| ENSP00000310448 | ENSP00000355013 |
| ENSP00000310448 | ENSP00000355205 |
| ENSP00000310448 | ENSP00000356405 |
| ENSP00000310448 | ENSP00000357887 |
| ENSP00000310448 | ENSP00000359454 |
| ENSP00000310448 | ENSP00000360286 |
| ENSP00000310448 | ENSP00000360532 |
| ENSP00000310448 | ENSP00000361076 |
| ENSP00000310448 | ENSP00000361557 |
| ENSP00000310448 | ENSP00000361577 |
| ENSP00000310448 | ENSP00000362110 |
| ENSP00000310448 | ENSP00000362900 |
| ENSP00000310448 | ENSP00000362936 |
| ENSP00000310448 | ENSP00000363313 |
| ENSP00000310448 | ENSP00000363559 |
| ENSP00000310448 | ENSP00000364289 |
| ENSP00000310448 | ENSP00000364813 |
| ENSP00000310448 | ENSP00000366557 |
| ENSP00000310448 | ENSP00000367439 |
| ENSP00000310448 | ENSP00000368801 |
| ENSP00000310448 | ENSP00000370589 |
| ENSP00000310448 | ENSP00000372883 |
| ENSP00000310448 | ENSP00000374213 |
| ENSP00000310448 | ENSP00000377747 |
| ENSP00000310448 | ENSP00000379607 |
| ENSP00000310448 | ENSP00000383059 |
| ENSP00000310448 | ENSP00000388872 |
| ENSP00000310448 | ENSP00000391432 |
| ENSP00000310448 | ENSP00000392601 |
| ENSP00000310448 | ENSP00000400591 |
| ENSP00000310448 | ENSP00000403345 |
| ENSP00000310448 | ENSP00000404151 |
| ENSP00000310448 | ENSP00000406280 |
| ENSP00000310448 | ENSP00000410758 |
| ENSP00000310448 | ENSP00000412566 |
| ENSP00000310448 | ENSP00000414006 |
| ENSP00000310448 | ENSP00000414634 |
| ENSP00000310459 | ENSP00000340505 |
| ENSP00000310520 | ENSP00000311873 |
| ENSP00000310520 | ENSP00000313171 |
| ENSP00000310520 | ENSP00000314949 |

|                 |                 |
|-----------------|-----------------|
| ENSP00000310520 | ENSP00000315700 |
| ENSP00000310520 | ENSP00000317636 |
| ENSP00000310520 | ENSP00000318977 |
| ENSP00000310520 | ENSP00000321636 |
| ENSP00000310520 | ENSP00000322570 |
| ENSP00000310520 | ENSP00000323439 |
| ENSP00000310520 | ENSP00000323511 |
| ENSP00000310520 | ENSP00000325863 |
| ENSP00000310520 | ENSP00000328940 |
| ENSP00000310520 | ENSP00000335557 |
| ENSP00000310520 | ENSP00000336606 |
| ENSP00000310520 | ENSP00000337353 |
| ENSP00000310520 | ENSP00000340305 |
| ENSP00000310520 | ENSP00000340879 |
| ENSP00000310520 | ENSP00000343392 |
| ENSP00000310520 | ENSP00000343741 |
| ENSP00000310520 | ENSP00000343745 |
| ENSP00000310520 | ENSP00000344741 |
| ENSP00000310520 | ENSP00000345917 |
| ENSP00000310520 | ENSP00000347232 |
| ENSP00000310520 | ENSP00000347978 |
| ENSP00000310520 | ENSP00000348020 |
| ENSP00000310520 | ENSP00000348089 |
| ENSP00000310520 | ENSP00000349393 |
| ENSP00000310520 | ENSP00000351284 |
| ENSP00000310520 | ENSP00000351697 |
| ENSP00000310520 | ENSP00000352257 |
| ENSP00000310520 | ENSP00000353332 |
| ENSP00000310520 | ENSP00000354522 |
| ENSP00000310520 | ENSP00000354957 |
| ENSP00000310520 | ENSP00000355077 |
| ENSP00000310520 | ENSP00000358019 |
| ENSP00000310520 | ENSP00000358478 |
| ENSP00000310520 | ENSP00000359904 |
| ENSP00000310520 | ENSP00000360116 |
| ENSP00000310520 | ENSP00000360310 |
| ENSP00000310520 | ENSP00000360803 |
| ENSP00000310520 | ENSP00000361310 |
| ENSP00000310520 | ENSP00000361824 |
| ENSP00000310520 | ENSP00000364126 |
| ENSP00000310520 | ENSP00000364270 |
| ENSP00000310520 | ENSP00000367787 |
| ENSP00000310520 | ENSP00000367910 |
| ENSP00000310520 | ENSP00000368349 |
| ENSP00000310520 | ENSP00000368438 |
| ENSP00000310520 | ENSP00000369335 |

|                 |                 |
|-----------------|-----------------|
| ENSP00000310520 | ENSP00000369411 |
| ENSP00000310520 | ENSP00000370151 |
| ENSP00000310520 | ENSP00000370376 |
| ENSP00000310520 | ENSP00000371475 |
| ENSP00000310520 | ENSP00000373952 |
| ENSP00000310520 | ENSP00000375809 |
| ENSP00000310520 | ENSP00000381657 |
| ENSP00000310520 | ENSP00000394649 |
| ENSP00000310520 | ENSP00000396704 |
| ENSP00000310520 | ENSP00000400806 |
| ENSP00000310520 | ENSP00000406490 |
| ENSP00000310520 | ENSP00000406868 |
| ENSP00000310521 | ENSP00000311134 |
| ENSP00000310521 | ENSP00000324628 |
| ENSP00000310521 | ENSP00000325002 |
| ENSP00000310521 | ENSP00000327309 |
| ENSP00000310521 | ENSP00000328079 |
| ENSP00000310521 | ENSP00000329419 |
| ENSP00000310521 | ENSP00000337478 |
| ENSP00000310521 | ENSP00000338533 |
| ENSP00000310521 | ENSP00000347329 |
| ENSP00000310521 | ENSP00000349887 |
| ENSP00000310521 | ENSP00000350708 |
| ENSP00000310521 | ENSP00000353073 |
| ENSP00000310521 | ENSP00000355721 |
| ENSP00000310521 | ENSP00000356405 |
| ENSP00000310521 | ENSP00000356530 |
| ENSP00000310521 | ENSP00000357048 |
| ENSP00000310521 | ENSP00000357887 |
| ENSP00000310521 | ENSP00000360183 |
| ENSP00000310521 | ENSP00000366225 |
| ENSP00000310521 | ENSP00000369810 |
| ENSP00000310521 | ENSP00000374213 |
| ENSP00000310521 | ENSP00000381293 |
| ENSP00000310521 | ENSP00000386759 |
| ENSP00000310521 | ENSP00000390783 |
| ENSP00000310521 | ENSP00000397441 |
| ENSP00000310521 | ENSP00000401445 |
| ENSP00000310521 | ENSP00000404247 |
| ENSP00000310521 | ENSP00000417748 |
| ENSP00000310521 | ENSP00000418661 |
| ENSP00000310547 | ENSP00000312587 |
| ENSP00000310547 | ENSP00000322316 |
| ENSP00000310547 | ENSP00000387262 |
| ENSP00000310551 | ENSP00000339245 |
| ENSP00000310551 | ENSP00000354876 |

|                 |                 |
|-----------------|-----------------|
| ENSP00000310551 | ENSP00000357998 |
| ENSP00000310557 | ENSP00000373363 |
| ENSP00000310557 | ENSP00000398350 |
| ENSP00000310561 | ENSP00000344456 |
| ENSP00000310561 | ENSP00000344666 |
| ENSP00000310561 | ENSP00000358770 |
| ENSP00000310561 | ENSP00000360916 |
| ENSP00000310585 | ENSP00000344456 |
| ENSP00000310585 | ENSP00000345731 |
| ENSP00000310585 | ENSP00000355299 |
| ENSP00000310585 | ENSP00000361467 |
| ENSP00000310585 | ENSP00000380150 |
| ENSP00000310585 | ENSP00000381031 |
| ENSP00000310590 | ENSP00000310842 |
| ENSP00000310590 | ENSP00000321449 |
| ENSP00000310590 | ENSP00000334849 |
| ENSP00000310590 | ENSP00000337127 |
| ENSP00000310590 | ENSP00000339795 |
| ENSP00000310590 | ENSP00000344401 |
| ENSP00000310590 | ENSP00000355759 |
| ENSP00000310590 | ENSP00000358563 |
| ENSP00000310590 | ENSP00000359000 |
| ENSP00000310590 | ENSP00000362153 |
| ENSP00000310590 | ENSP00000363746 |
| ENSP00000310590 | ENSP00000367029 |
| ENSP00000310590 | ENSP00000368438 |
| ENSP00000310590 | ENSP00000372695 |
| ENSP00000310590 | ENSP00000380460 |
| ENSP00000310590 | ENSP00000399454 |
| ENSP00000310590 | ENSP00000402869 |
| ENSP00000310590 | ENSP00000405614 |
| ENSP00000310593 | ENSP00000380921 |
| ENSP00000310596 | ENSP00000311430 |
| ENSP00000310596 | ENSP00000311505 |
| ENSP00000310596 | ENSP00000313432 |
| ENSP00000310596 | ENSP00000313674 |
| ENSP00000310596 | ENSP00000314311 |
| ENSP00000310596 | ENSP00000315035 |
| ENSP00000310596 | ENSP00000315379 |
| ENSP00000310596 | ENSP00000316879 |
| ENSP00000310596 | ENSP00000318195 |
| ENSP00000310596 | ENSP00000318604 |
| ENSP00000310596 | ENSP00000319341 |
| ENSP00000310596 | ENSP00000320503 |
| ENSP00000310596 | ENSP00000320566 |
| ENSP00000310596 | ENSP00000322242 |

|                 |                 |
|-----------------|-----------------|
| ENSP00000310596 | ENSP00000322419 |
| ENSP00000310596 | ENSP00000323076 |
| ENSP00000310596 | ENSP00000323302 |
| ENSP00000310596 | ENSP00000324122 |
| ENSP00000310596 | ENSP00000325448 |
| ENSP00000310596 | ENSP00000337393 |
| ENSP00000310596 | ENSP00000337839 |
| ENSP00000310596 | ENSP00000339090 |
| ENSP00000310596 | ENSP00000339145 |
| ENSP00000310596 | ENSP00000341743 |
| ENSP00000310596 | ENSP00000342374 |
| ENSP00000310596 | ENSP00000343742 |
| ENSP00000310596 | ENSP00000346015 |
| ENSP00000310596 | ENSP00000347087 |
| ENSP00000310596 | ENSP00000348708 |
| ENSP00000310596 | ENSP00000349616 |
| ENSP00000310596 | ENSP00000351284 |
| ENSP00000310596 | ENSP00000351596 |
| ENSP00000310596 | ENSP00000351885 |
| ENSP00000310596 | ENSP00000352738 |
| ENSP00000310596 | ENSP00000352820 |
| ENSP00000310596 | ENSP00000353059 |
| ENSP00000310596 | ENSP00000353622 |
| ENSP00000310596 | ENSP00000354522 |
| ENSP00000310596 | ENSP00000356346 |
| ENSP00000310596 | ENSP00000356405 |
| ENSP00000310596 | ENSP00000356811 |
| ENSP00000310596 | ENSP00000356989 |
| ENSP00000310596 | ENSP00000357602 |
| ENSP00000310596 | ENSP00000357887 |
| ENSP00000310596 | ENSP00000357907 |
| ENSP00000310596 | ENSP00000358478 |
| ENSP00000310596 | ENSP00000359939 |
| ENSP00000310596 | ENSP00000361949 |
| ENSP00000310596 | ENSP00000362413 |
| ENSP00000310596 | ENSP00000362576 |
| ENSP00000310596 | ENSP00000362900 |
| ENSP00000310596 | ENSP00000363313 |
| ENSP00000310596 | ENSP00000364293 |
| ENSP00000310596 | ENSP00000364543 |
| ENSP00000310596 | ENSP00000364813 |
| ENSP00000310596 | ENSP00000366843 |
| ENSP00000310596 | ENSP00000366953 |
| ENSP00000310596 | ENSP00000366974 |
| ENSP00000310596 | ENSP00000369757 |
| ENSP00000310596 | ENSP00000370119 |

|                 |                 |
|-----------------|-----------------|
| ENSP00000310596 | ENSP00000370555 |
| ENSP00000310596 | ENSP00000370589 |
| ENSP00000310596 | ENSP00000372023 |
| ENSP00000310596 | ENSP00000372093 |
| ENSP00000310596 | ENSP00000372827 |
| ENSP00000310596 | ENSP00000373715 |
| ENSP00000310596 | ENSP00000376268 |
| ENSP00000310596 | ENSP00000376973 |
| ENSP00000310596 | ENSP00000380460 |
| ENSP00000310596 | ENSP00000382177 |
| ENSP00000310596 | ENSP00000382492 |
| ENSP00000310596 | ENSP00000386759 |
| ENSP00000310596 | ENSP00000391723 |
| ENSP00000310596 | ENSP00000394400 |
| ENSP00000310596 | ENSP00000398597 |
| ENSP00000310596 | ENSP00000399530 |
| ENSP00000310596 | ENSP00000400626 |
| ENSP00000310596 | ENSP00000410758 |
| ENSP00000310596 | ENSP00000412310 |
| ENSP00000310596 | ENSP00000414006 |
| ENSP00000310596 | ENSP00000414634 |
| ENSP00000310621 | ENSP00000311200 |
| ENSP00000310621 | ENSP00000348602 |
| ENSP00000310621 | ENSP00000356146 |
| ENSP00000310621 | ENSP00000356530 |
| ENSP00000310621 | ENSP00000368226 |
| ENSP00000310621 | ENSP00000401445 |
| ENSP00000310622 | ENSP00000334061 |
| ENSP00000310623 | ENSP00000337127 |
| ENSP00000310623 | ENSP00000342026 |
| ENSP00000310623 | ENSP00000342056 |
| ENSP00000310623 | ENSP00000363205 |
| ENSP00000310623 | ENSP00000366482 |
| ENSP00000310623 | ENSP00000387219 |
| ENSP00000310649 | ENSP00000311005 |
| ENSP00000310649 | ENSP00000315859 |
| ENSP00000310649 | ENSP00000317904 |
| ENSP00000310649 | ENSP00000318775 |
| ENSP00000310649 | ENSP00000319169 |
| ENSP00000310649 | ENSP00000320488 |
| ENSP00000310649 | ENSP00000322180 |
| ENSP00000310649 | ENSP00000322957 |
| ENSP00000310649 | ENSP00000335044 |
| ENSP00000310649 | ENSP00000335357 |
| ENSP00000310649 | ENSP00000340954 |
| ENSP00000310649 | ENSP00000343392 |

|                 |                 |
|-----------------|-----------------|
| ENSP00000310649 | ENSP00000347602 |
| ENSP00000310649 | ENSP00000347733 |
| ENSP00000310649 | ENSP00000348877 |
| ENSP00000310649 | ENSP00000350078 |
| ENSP00000310649 | ENSP00000350491 |
| ENSP00000310649 | ENSP00000351596 |
| ENSP00000310649 | ENSP00000353793 |
| ENSP00000310649 | ENSP00000354916 |
| ENSP00000310649 | ENSP00000357907 |
| ENSP00000310649 | ENSP00000358886 |
| ENSP00000310649 | ENSP00000360076 |
| ENSP00000310649 | ENSP00000362171 |
| ENSP00000310649 | ENSP00000362578 |
| ENSP00000310649 | ENSP00000369897 |
| ENSP00000310649 | ENSP00000372023 |
| ENSP00000310649 | ENSP00000374213 |
| ENSP00000310649 | ENSP00000378350 |
| ENSP00000310649 | ENSP00000378529 |
| ENSP00000310649 | ENSP00000391249 |
| ENSP00000310649 | ENSP00000391944 |
| ENSP00000310649 | ENSP00000402084 |
| ENSP00000310649 | ENSP00000403817 |
| ENSP00000310668 | ENSP00000311430 |
| ENSP00000310668 | ENSP00000316032 |
| ENSP00000310668 | ENSP00000322016 |
| ENSP00000310668 | ENSP00000323511 |
| ENSP00000310668 | ENSP00000325312 |
| ENSP00000310668 | ENSP00000325376 |
| ENSP00000310668 | ENSP00000326806 |
| ENSP00000310668 | ENSP00000329466 |
| ENSP00000310668 | ENSP00000331817 |
| ENSP00000310668 | ENSP00000335357 |
| ENSP00000310668 | ENSP00000336712 |
| ENSP00000310668 | ENSP00000337797 |
| ENSP00000310668 | ENSP00000340698 |
| ENSP00000310668 | ENSP00000346453 |
| ENSP00000310668 | ENSP00000346566 |
| ENSP00000310668 | ENSP00000348577 |
| ENSP00000310668 | ENSP00000353073 |
| ENSP00000310668 | ENSP00000354916 |
| ENSP00000310668 | ENSP00000355922 |
| ENSP00000310668 | ENSP00000356448 |
| ENSP00000310668 | ENSP00000357547 |
| ENSP00000310668 | ENSP00000360286 |
| ENSP00000310668 | ENSP00000360532 |
| ENSP00000310668 | ENSP00000361949 |



|                 |                 |
|-----------------|-----------------|
| ENSP00000310668 | ENSP00000362413 |
| ENSP00000310668 | ENSP00000362900 |
| ENSP00000310668 | ENSP00000366557 |
| ENSP00000310668 | ENSP00000371155 |
| ENSP00000310668 | ENSP00000371451 |
| ENSP00000310668 | ENSP00000382779 |
| ENSP00000310668 | ENSP00000391723 |
| ENSP00000310701 | ENSP00000311005 |
| ENSP00000310701 | ENSP00000311343 |
| ENSP00000310701 | ENSP00000313243 |
| ENSP00000310701 | ENSP00000354927 |
| ENSP00000310701 | ENSP00000356448 |
| ENSP00000310701 | ENSP00000357440 |
| ENSP00000310701 | ENSP00000359444 |
| ENSP00000310701 | ENSP00000359668 |
| ENSP00000310701 | ENSP00000364895 |
| ENSP00000310701 | ENSP00000365005 |
| ENSP00000310701 | ENSP00000370410 |
| ENSP00000310721 | ENSP00000312458 |
| ENSP00000310721 | ENSP00000320604 |
| ENSP00000310721 | ENSP00000325425 |
| ENSP00000310721 | ENSP00000327716 |
| ENSP00000310721 | ENSP00000330812 |
| ENSP00000310721 | ENSP00000340896 |
| ENSP00000310721 | ENSP00000341662 |
| ENSP00000310721 | ENSP00000344460 |
| ENSP00000310721 | ENSP00000348762 |
| ENSP00000310721 | ENSP00000349877 |
| ENSP00000310721 | ENSP00000355955 |
| ENSP00000310721 | ENSP00000360918 |
| ENSP00000310723 | ENSP00000311430 |
| ENSP00000310723 | ENSP00000312981 |
| ENSP00000310723 | ENSP00000315859 |
| ENSP00000310723 | ENSP00000324203 |
| ENSP00000310723 | ENSP00000329466 |
| ENSP00000310723 | ENSP00000331817 |
| ENSP00000310723 | ENSP00000339090 |
| ENSP00000310723 | ENSP00000354522 |
| ENSP00000310723 | ENSP00000356448 |
| ENSP00000310723 | ENSP00000357887 |
| ENSP00000310723 | ENSP00000358812 |
| ENSP00000310723 | ENSP00000362936 |
| ENSP00000310723 | ENSP00000363313 |
| ENSP00000310723 | ENSP00000364289 |
| ENSP00000310723 | ENSP00000366557 |
| ENSP00000310723 | ENSP00000368801 |

|                 |                 |
|-----------------|-----------------|
| ENSP00000310723 | ENSP00000377640 |
| ENSP00000310723 | ENSP00000393953 |
| ENSP00000310785 | ENSP00000365318 |
| ENSP00000310785 | ENSP00000379607 |
| ENSP00000310785 | ENSP00000383142 |
| ENSP00000310800 | ENSP00000325954 |
| ENSP00000310800 | ENSP00000334003 |
| ENSP00000310800 | ENSP00000337439 |
| ENSP00000310800 | ENSP00000345731 |
| ENSP00000310800 | ENSP00000349486 |
| ENSP00000310800 | ENSP00000351605 |
| ENSP00000310800 | ENSP00000355760 |
| ENSP00000310800 | ENSP00000361467 |
| ENSP00000310800 | ENSP00000368797 |
| ENSP00000310800 | ENSP00000375783 |
| ENSP00000310800 | ENSP00000380150 |
| ENSP00000310832 | ENSP00000357484 |
| ENSP00000310842 | ENSP00000329466 |
| ENSP00000310842 | ENSP00000337797 |
| ENSP00000310842 | ENSP00000354497 |
| ENSP00000310842 | ENSP00000360532 |
| ENSP00000310842 | ENSP00000364847 |
| ENSP00000310842 | ENSP00000372316 |
| ENSP00000310842 | ENSP00000379607 |
| ENSP00000310842 | ENSP00000381891 |
| ENSP00000310842 | ENSP00000385021 |
| ENSP00000310933 | ENSP00000313059 |
| ENSP00000310933 | ENSP00000337797 |
| ENSP00000310933 | ENSP00000338990 |
| ENSP00000310933 | ENSP00000348565 |
| ENSP00000310933 | ENSP00000350249 |
| ENSP00000310933 | ENSP00000350854 |
| ENSP00000310933 | ENSP00000360660 |
| ENSP00000310951 | ENSP00000350512 |
| ENSP00000310951 | ENSP00000392270 |
| ENSP00000310966 | ENSP00000327072 |
| ENSP00000310966 | ENSP00000354566 |
| ENSP00000310966 | ENSP00000361465 |
| ENSP00000310966 | ENSP00000364270 |
| ENSP00000310966 | ENSP00000367029 |
| ENSP00000310966 | ENSP00000379607 |
| ENSP00000310998 | ENSP00000316476 |
| ENSP00000310998 | ENSP00000351926 |
| ENSP00000310998 | ENSP00000360798 |
| ENSP00000311005 | ENSP00000314949 |
| ENSP00000311005 | ENSP00000322457 |

|                 |                 |
|-----------------|-----------------|
| ENSP00000311005 | ENSP00000326110 |
| ENSP00000311005 | ENSP00000332444 |
| ENSP00000311005 | ENSP00000336528 |
| ENSP00000311005 | ENSP00000340019 |
| ENSP00000311005 | ENSP00000340879 |
| ENSP00000311005 | ENSP00000341848 |
| ENSP00000311005 | ENSP00000347294 |
| ENSP00000311005 | ENSP00000349959 |
| ENSP00000311005 | ENSP00000350681 |
| ENSP00000311005 | ENSP00000351015 |
| ENSP00000311005 | ENSP00000351416 |
| ENSP00000311005 | ENSP00000354519 |
| ENSP00000311005 | ENSP00000354558 |
| ENSP00000311005 | ENSP00000354927 |
| ENSP00000311005 | ENSP00000356379 |
| ENSP00000311005 | ENSP00000357182 |
| ENSP00000311005 | ENSP00000357283 |
| ENSP00000311005 | ENSP00000357494 |
| ENSP00000311005 | ENSP00000360621 |
| ENSP00000311005 | ENSP00000361264 |
| ENSP00000311005 | ENSP00000362413 |
| ENSP00000311005 | ENSP00000365005 |
| ENSP00000311005 | ENSP00000369042 |
| ENSP00000311005 | ENSP00000373474 |
| ENSP00000311005 | ENSP00000375986 |
| ENSP00000311005 | ENSP00000378306 |
| ENSP00000311005 | ENSP00000379372 |
| ENSP00000311005 | ENSP00000379709 |
| ENSP00000311005 | ENSP00000380129 |
| ENSP00000311005 | ENSP00000380349 |
| ENSP00000311005 | ENSP00000382177 |
| ENSP00000311005 | ENSP00000383295 |
| ENSP00000311010 | ENSP00000318646 |
| ENSP00000311010 | ENSP00000325663 |
| ENSP00000311010 | ENSP00000337501 |
| ENSP00000311028 | ENSP00000311430 |
| ENSP00000311028 | ENSP00000315674 |
| ENSP00000311028 | ENSP00000317872 |
| ENSP00000311028 | ENSP00000318646 |
| ENSP00000311028 | ENSP00000320658 |
| ENSP00000311028 | ENSP00000320917 |
| ENSP00000311028 | ENSP00000322419 |
| ENSP00000311028 | ENSP00000323856 |
| ENSP00000311028 | ENSP00000326981 |
| ENSP00000311028 | ENSP00000327179 |
| ENSP00000311028 | ENSP00000329466 |

|                 |                 |
|-----------------|-----------------|
| ENSP00000311028 | ENSP00000331019 |
| ENSP00000311028 | ENSP00000335657 |
| ENSP00000311028 | ENSP00000336702 |
| ENSP00000311028 | ENSP00000337127 |
| ENSP00000311028 | ENSP00000339095 |
| ENSP00000311028 | ENSP00000339795 |
| ENSP00000311028 | ENSP00000341885 |
| ENSP00000311028 | ENSP00000342300 |
| ENSP00000311028 | ENSP00000345156 |
| ENSP00000311028 | ENSP00000346015 |
| ENSP00000311028 | ENSP00000346022 |
| ENSP00000311028 | ENSP00000346027 |
| ENSP00000311028 | ENSP00000346037 |
| ENSP00000311028 | ENSP00000346050 |
| ENSP00000311028 | ENSP00000346067 |
| ENSP00000311028 | ENSP00000347087 |
| ENSP00000311028 | ENSP00000354525 |
| ENSP00000311028 | ENSP00000354739 |
| ENSP00000311028 | ENSP00000355471 |
| ENSP00000311028 | ENSP00000356134 |
| ENSP00000311028 | ENSP00000356548 |
| ENSP00000311028 | ENSP00000356811 |
| ENSP00000311028 | ENSP00000361076 |
| ENSP00000311028 | ENSP00000362036 |
| ENSP00000311028 | ENSP00000362576 |
| ENSP00000311028 | ENSP00000362688 |
| ENSP00000311028 | ENSP00000362744 |
| ENSP00000311028 | ENSP00000363018 |
| ENSP00000311028 | ENSP00000363308 |
| ENSP00000311028 | ENSP00000363676 |
| ENSP00000311028 | ENSP00000364320 |
| ENSP00000311028 | ENSP00000368790 |
| ENSP00000311028 | ENSP00000369757 |
| ENSP00000311028 | ENSP00000372445 |
| ENSP00000311028 | ENSP00000373404 |
| ENSP00000311028 | ENSP00000375730 |
| ENSP00000311028 | ENSP00000377640 |
| ENSP00000311028 | ENSP00000379339 |
| ENSP00000311028 | ENSP00000379372 |
| ENSP00000311028 | ENSP00000379607 |
| ENSP00000311028 | ENSP00000379888 |
| ENSP00000311028 | ENSP00000384302 |
| ENSP00000311028 | ENSP00000386717 |
| ENSP00000311028 | ENSP00000389103 |
| ENSP00000311028 | ENSP00000393241 |
| ENSP00000311028 | ENSP00000393393 |

|                 |                 |
|-----------------|-----------------|
| ENSP00000311028 | ENSP00000402338 |
| ENSP00000311028 | ENSP00000403175 |
| ENSP00000311028 | ENSP00000412583 |
| ENSP00000311028 | ENSP00000414321 |
| ENSP00000311028 | ENSP00000416110 |
| ENSP00000311028 | ENSP00000417281 |
| ENSP00000311028 | ENSP00000417763 |
| ENSP00000311035 | ENSP00000420298 |
| ENSP00000311083 | ENSP00000312981 |
| ENSP00000311083 | ENSP00000317376 |
| ENSP00000311083 | ENSP00000323246 |
| ENSP00000311083 | ENSP00000334148 |
| ENSP00000311083 | ENSP00000344460 |
| ENSP00000311083 | ENSP00000345728 |
| ENSP00000311083 | ENSP00000348554 |
| ENSP00000311083 | ENSP00000358563 |
| ENSP00000311083 | ENSP00000360268 |
| ENSP00000311083 | ENSP00000360621 |
| ENSP00000311083 | ENSP00000367034 |
| ENSP00000311083 | ENSP00000378350 |
| ENSP00000311083 | ENSP00000378529 |
| ENSP00000311134 | ENSP00000316990 |
| ENSP00000311134 | ENSP00000325002 |
| ENSP00000311134 | ENSP00000327650 |
| ENSP00000311134 | ENSP00000336724 |
| ENSP00000311134 | ENSP00000343435 |
| ENSP00000311134 | ENSP00000346139 |
| ENSP00000311134 | ENSP00000352708 |
| ENSP00000311134 | ENSP00000373979 |
| ENSP00000311134 | ENSP00000377280 |
| ENSP00000311134 | ENSP00000381089 |
| ENSP00000311134 | ENSP00000390783 |
| ENSP00000311135 | ENSP00000314193 |
| ENSP00000311135 | ENSP00000314311 |
| ENSP00000311135 | ENSP00000315674 |
| ENSP00000311135 | ENSP00000317992 |
| ENSP00000311135 | ENSP00000320566 |
| ENSP00000311135 | ENSP00000320917 |
| ENSP00000311135 | ENSP00000322396 |
| ENSP00000311135 | ENSP00000326806 |
| ENSP00000311135 | ENSP00000326981 |
| ENSP00000311135 | ENSP00000327179 |
| ENSP00000311135 | ENSP00000328854 |
| ENSP00000311135 | ENSP00000329466 |
| ENSP00000311135 | ENSP00000331817 |
| ENSP00000311135 | ENSP00000335321 |

|                 |                 |
|-----------------|-----------------|
| ENSP00000311135 | ENSP00000339095 |
| ENSP00000311135 | ENSP00000340271 |
| ENSP00000311135 | ENSP00000343557 |
| ENSP00000311135 | ENSP00000346120 |
| ENSP00000311135 | ENSP00000355541 |
| ENSP00000311135 | ENSP00000358563 |
| ENSP00000311135 | ENSP00000358812 |
| ENSP00000311135 | ENSP00000359688 |
| ENSP00000311135 | ENSP00000360031 |
| ENSP00000311135 | ENSP00000361577 |
| ENSP00000311135 | ENSP00000362592 |
| ENSP00000311135 | ENSP00000362744 |
| ENSP00000311135 | ENSP00000362936 |
| ENSP00000311135 | ENSP00000363642 |
| ENSP00000311135 | ENSP00000363746 |
| ENSP00000311135 | ENSP00000364929 |
| ENSP00000311135 | ENSP00000366135 |
| ENSP00000311135 | ENSP00000366557 |
| ENSP00000311135 | ENSP00000366607 |
| ENSP00000311135 | ENSP00000367024 |
| ENSP00000311135 | ENSP00000368984 |
| ENSP00000311135 | ENSP00000370589 |
| ENSP00000311135 | ENSP00000371169 |
| ENSP00000311135 | ENSP00000372023 |
| ENSP00000311135 | ENSP00000372695 |
| ENSP00000311135 | ENSP00000377944 |
| ENSP00000311135 | ENSP00000379888 |
| ENSP00000311135 | ENSP00000398597 |
| ENSP00000311135 | ENSP00000399454 |
| ENSP00000311135 | ENSP00000402338 |
| ENSP00000311135 | ENSP00000402869 |
| ENSP00000311135 | ENSP00000405614 |
| ENSP00000311184 | ENSP00000348307 |
| ENSP00000311184 | ENSP00000356991 |
| ENSP00000311196 | ENSP00000351407 |
| ENSP00000311200 | ENSP00000317334 |
| ENSP00000311200 | ENSP00000317468 |
| ENSP00000311200 | ENSP00000328968 |
| ENSP00000311200 | ENSP00000331268 |
| ENSP00000311200 | ENSP00000338607 |
| ENSP00000311200 | ENSP00000345530 |
| ENSP00000311200 | ENSP00000346809 |
| ENSP00000311200 | ENSP00000350854 |
| ENSP00000311200 | ENSP00000351346 |
| ENSP00000311200 | ENSP00000353362 |
| ENSP00000311200 | ENSP00000361057 |

|                 |                 |
|-----------------|-----------------|
| ENSP00000311200 | ENSP00000376946 |
| ENSP00000311200 | ENSP00000379228 |
| ENSP00000311200 | ENSP00000380793 |
| ENSP00000311202 | ENSP00000323856 |
| ENSP00000311202 | ENSP00000329715 |
| ENSP00000311202 | ENSP00000356602 |
| ENSP00000311202 | ENSP00000368438 |
| ENSP00000311202 | ENSP00000370410 |
| ENSP00000311221 | ENSP00000356520 |
| ENSP00000311245 | ENSP00000341213 |
| ENSP00000311245 | ENSP00000397435 |
| ENSP00000311290 | ENSP00000344456 |
| ENSP00000311290 | ENSP00000372023 |
| ENSP00000311318 | ENSP00000324560 |
| ENSP00000311318 | ENSP00000331310 |
| ENSP00000311318 | ENSP00000343313 |
| ENSP00000311318 | ENSP00000348784 |
| ENSP00000311318 | ENSP00000371888 |
| ENSP00000311343 | ENSP00000315659 |
| ENSP00000311343 | ENSP00000316845 |
| ENSP00000311343 | ENSP00000320949 |
| ENSP00000311343 | ENSP00000327315 |
| ENSP00000311343 | ENSP00000348215 |
| ENSP00000311343 | ENSP00000354673 |
| ENSP00000311343 | ENSP00000354927 |
| ENSP00000311343 | ENSP00000360644 |
| ENSP00000311343 | ENSP00000361009 |
| ENSP00000311343 | ENSP00000365005 |
| ENSP00000311343 | ENSP00000380450 |
| ENSP00000311343 | ENSP00000382423 |
| ENSP00000311343 | ENSP00000403397 |
| ENSP00000311344 | ENSP00000311766 |
| ENSP00000311344 | ENSP00000315702 |
| ENSP00000311344 | ENSP00000318195 |
| ENSP00000311344 | ENSP00000318604 |
| ENSP00000311344 | ENSP00000318641 |
| ENSP00000311344 | ENSP00000321711 |
| ENSP00000311344 | ENSP00000327889 |
| ENSP00000311344 | ENSP00000334767 |
| ENSP00000311344 | ENSP00000339881 |
| ENSP00000311344 | ENSP00000340019 |
| ENSP00000311344 | ENSP00000340278 |
| ENSP00000311344 | ENSP00000347719 |
| ENSP00000311344 | ENSP00000348573 |
| ENSP00000311344 | ENSP00000348784 |
| ENSP00000311344 | ENSP00000350071 |

|                 |                 |
|-----------------|-----------------|
| ENSP00000311344 | ENSP00000350447 |
| ENSP00000311344 | ENSP00000350785 |
| ENSP00000311344 | ENSP00000352676 |
| ENSP00000311344 | ENSP00000354558 |
| ENSP00000311344 | ENSP00000355812 |
| ENSP00000311344 | ENSP00000358140 |
| ENSP00000311344 | ENSP00000358810 |
| ENSP00000311344 | ENSP00000371888 |
| ENSP00000311344 | ENSP00000379093 |
| ENSP00000311344 | ENSP00000385722 |
| ENSP00000311344 | ENSP00000417963 |
| ENSP00000311368 | ENSP00000322570 |
| ENSP00000311368 | ENSP00000357861 |
| ENSP00000311368 | ENSP00000358071 |
| ENSP00000311368 | ENSP00000368438 |
| ENSP00000311368 | ENSP00000370150 |
| ENSP00000311368 | ENSP00000372316 |
| ENSP00000311368 | ENSP00000379607 |
| ENSP00000311429 | ENSP00000328236 |
| ENSP00000311430 | ENSP00000312311 |
| ENSP00000311430 | ENSP00000314348 |
| ENSP00000311430 | ENSP00000317376 |
| ENSP00000311430 | ENSP00000318646 |
| ENSP00000311430 | ENSP00000319977 |
| ENSP00000311430 | ENSP00000321449 |
| ENSP00000311430 | ENSP00000322419 |
| ENSP00000311430 | ENSP00000326981 |
| ENSP00000311430 | ENSP00000328690 |
| ENSP00000311430 | ENSP00000329466 |
| ENSP00000311430 | ENSP00000336702 |
| ENSP00000311430 | ENSP00000337839 |
| ENSP00000311430 | ENSP00000338862 |
| ENSP00000311430 | ENSP00000339095 |
| ENSP00000311430 | ENSP00000339145 |
| ENSP00000311430 | ENSP00000339795 |
| ENSP00000311430 | ENSP00000339845 |
| ENSP00000311430 | ENSP00000341082 |
| ENSP00000311430 | ENSP00000341538 |
| ENSP00000311430 | ENSP00000343392 |
| ENSP00000311430 | ENSP00000343745 |
| ENSP00000311430 | ENSP00000345156 |
| ENSP00000311430 | ENSP00000346015 |
| ENSP00000311430 | ENSP00000346022 |
| ENSP00000311430 | ENSP00000346027 |
| ENSP00000311430 | ENSP00000346037 |
| ENSP00000311430 | ENSP00000346050 |



|                 |                 |
|-----------------|-----------------|
| ENSP00000311430 | ENSP00000346088 |
| ENSP00000311430 | ENSP00000346120 |
| ENSP00000311430 | ENSP00000346725 |
| ENSP00000311430 | ENSP00000352738 |
| ENSP00000311430 | ENSP00000354040 |
| ENSP00000311430 | ENSP00000354125 |
| ENSP00000311430 | ENSP00000354739 |
| ENSP00000311430 | ENSP00000355136 |
| ENSP00000311430 | ENSP00000355899 |
| ENSP00000311430 | ENSP00000359345 |
| ENSP00000311430 | ENSP00000359518 |
| ENSP00000311430 | ENSP00000360031 |
| ENSP00000311430 | ENSP00000360286 |
| ENSP00000311430 | ENSP00000361076 |
| ENSP00000311430 | ENSP00000361616 |
| ENSP00000311430 | ENSP00000362334 |
| ENSP00000311430 | ENSP00000362744 |
| ENSP00000311430 | ENSP00000363018 |
| ENSP00000311430 | ENSP00000363676 |
| ENSP00000311430 | ENSP00000364320 |
| ENSP00000311430 | ENSP00000366519 |
| ENSP00000311430 | ENSP00000368887 |
| ENSP00000311430 | ENSP00000369757 |
| ENSP00000311430 | ENSP00000369965 |
| ENSP00000311430 | ENSP00000370589 |
| ENSP00000311430 | ENSP00000374390 |
| ENSP00000311430 | ENSP00000375730 |
| ENSP00000311430 | ENSP00000377486 |
| ENSP00000311430 | ENSP00000377640 |
| ENSP00000311430 | ENSP00000377865 |
| ENSP00000311430 | ENSP00000378160 |
| ENSP00000311430 | ENSP00000379607 |
| ENSP00000311430 | ENSP00000379888 |
| ENSP00000311430 | ENSP00000380156 |
| ENSP00000311430 | ENSP00000380982 |
| ENSP00000311430 | ENSP00000382392 |
| ENSP00000311430 | ENSP00000386621 |
| ENSP00000311430 | ENSP00000386717 |
| ENSP00000311430 | ENSP00000389103 |
| ENSP00000311430 | ENSP00000393393 |
| ENSP00000311430 | ENSP00000402338 |
| ENSP00000311430 | ENSP00000403817 |
| ENSP00000311430 | ENSP00000414321 |
| ENSP00000311430 | ENSP00000417229 |
| ENSP00000311436 | ENSP00000330343 |
| ENSP00000311436 | ENSP00000332721 |

|                 |                 |
|-----------------|-----------------|
| ENSP00000311496 | ENSP00000315791 |
| ENSP00000311496 | ENSP00000331487 |
| ENSP00000311496 | ENSP00000345892 |
| ENSP00000311496 | ENSP00000347836 |
| ENSP00000311496 | ENSP00000357998 |
| ENSP00000311496 | ENSP00000379457 |
| ENSP00000311496 | ENSP00000383719 |
| ENSP00000311502 | ENSP00000344668 |
| ENSP00000311505 | ENSP00000313169 |
| ENSP00000311505 | ENSP00000313420 |
| ENSP00000311505 | ENSP00000313513 |
| ENSP00000311505 | ENSP00000321706 |
| ENSP00000311505 | ENSP00000325136 |
| ENSP00000311505 | ENSP00000326238 |
| ENSP00000311505 | ENSP00000326514 |
| ENSP00000311505 | ENSP00000327145 |
| ENSP00000311505 | ENSP00000327821 |
| ENSP00000311505 | ENSP00000328236 |
| ENSP00000311505 | ENSP00000334100 |
| ENSP00000311505 | ENSP00000336702 |
| ENSP00000311505 | ENSP00000336927 |
| ENSP00000311505 | ENSP00000340596 |
| ENSP00000311505 | ENSP00000340944 |
| ENSP00000311505 | ENSP00000346240 |
| ENSP00000311505 | ENSP00000346874 |
| ENSP00000311505 | ENSP00000350491 |
| ENSP00000311505 | ENSP00000350894 |
| ENSP00000311505 | ENSP00000353660 |
| ENSP00000311505 | ENSP00000354045 |
| ENSP00000311505 | ENSP00000354977 |
| ENSP00000311505 | ENSP00000355013 |
| ENSP00000311505 | ENSP00000355518 |
| ENSP00000311505 | ENSP00000356989 |
| ENSP00000311505 | ENSP00000357791 |
| ENSP00000311505 | ENSP00000358857 |
| ENSP00000311505 | ENSP00000359837 |
| ENSP00000311505 | ENSP00000361658 |
| ENSP00000311505 | ENSP00000362298 |
| ENSP00000311505 | ENSP00000362334 |
| ENSP00000311505 | ENSP00000362399 |
| ENSP00000311505 | ENSP00000362413 |
| ENSP00000311505 | ENSP00000366135 |
| ENSP00000311505 | ENSP00000366672 |
| ENSP00000311505 | ENSP00000367398 |
| ENSP00000311505 | ENSP00000367766 |
| ENSP00000311505 | ENSP00000368767 |

|                 |                 |
|-----------------|-----------------|
| ENSP00000311505 | ENSP00000369257 |
| ENSP00000311505 | ENSP00000370023 |
| ENSP00000311505 | ENSP00000370119 |
| ENSP00000311505 | ENSP00000370543 |
| ENSP00000311505 | ENSP00000373370 |
| ENSP00000311505 | ENSP00000379933 |
| ENSP00000311505 | ENSP00000381567 |
| ENSP00000311505 | ENSP00000381793 |
| ENSP00000311505 | ENSP00000389934 |
| ENSP00000311505 | ENSP00000394071 |
| ENSP00000311505 | ENSP00000407487 |
| ENSP00000311505 | ENSP00000414920 |
| ENSP00000311513 | ENSP00000312697 |
| ENSP00000311513 | ENSP00000329466 |
| ENSP00000311513 | ENSP00000336868 |
| ENSP00000311513 | ENSP00000351250 |
| ENSP00000311513 | ENSP00000357887 |
| ENSP00000311513 | ENSP00000371546 |
| ENSP00000311579 | ENSP00000350249 |
| ENSP00000311579 | ENSP00000350990 |
| ENSP00000311579 | ENSP00000352408 |
| ENSP00000311579 | ENSP00000355596 |
| ENSP00000311579 | ENSP00000358022 |
| ENSP00000311579 | ENSP00000370194 |
| ENSP00000311579 | ENSP00000373301 |
| ENSP00000311579 | ENSP00000399511 |
| ENSP00000311579 | ENSP00000413625 |
| ENSP00000311665 | ENSP00000319104 |
| ENSP00000311665 | ENSP00000348442 |
| ENSP00000311665 | ENSP00000357907 |
| ENSP00000311665 | ENSP00000360473 |
| ENSP00000311665 | ENSP00000363779 |
| ENSP00000311665 | ENSP00000381891 |
| ENSP00000311665 | ENSP00000386759 |
| ENSP00000311665 | ENSP00000396937 |
| ENSP00000311665 | ENSP00000416583 |
| ENSP00000311677 | ENSP00000316578 |
| ENSP00000311677 | ENSP00000325863 |
| ENSP00000311677 | ENSP00000335321 |
| ENSP00000311677 | ENSP00000355050 |
| ENSP00000311677 | ENSP00000360532 |
| ENSP00000311677 | ENSP00000362592 |
| ENSP00000311697 | ENSP00000339826 |
| ENSP00000311747 | ENSP00000346725 |
| ENSP00000311747 | ENSP00000350249 |
| ENSP00000311747 | ENSP00000351894 |

|                 |                 |
|-----------------|-----------------|
| ENSP00000311747 | ENSP00000352514 |
| ENSP00000311747 | ENSP00000354951 |
| ENSP00000311747 | ENSP00000355759 |
| ENSP00000311747 | ENSP00000359345 |
| ENSP00000311747 | ENSP00000379607 |
| ENSP00000311766 | ENSP00000317790 |
| ENSP00000311766 | ENSP00000319323 |
| ENSP00000311766 | ENSP00000323511 |
| ENSP00000311766 | ENSP00000341213 |
| ENSP00000311766 | ENSP00000348577 |
| ENSP00000311766 | ENSP00000348886 |
| ENSP00000311766 | ENSP00000349142 |
| ENSP00000311766 | ENSP00000353826 |
| ENSP00000311766 | ENSP00000355890 |
| ENSP00000311766 | ENSP00000357547 |
| ENSP00000311766 | ENSP00000361824 |
| ENSP00000311766 | ENSP00000362399 |
| ENSP00000311766 | ENSP00000362576 |
| ENSP00000311766 | ENSP00000363205 |
| ENSP00000311768 | ENSP00000362463 |
| ENSP00000311768 | ENSP00000400591 |
| ENSP00000311816 | ENSP00000323967 |
| ENSP00000311816 | ENSP00000329357 |
| ENSP00000311816 | ENSP00000347184 |
| ENSP00000311816 | ENSP00000353622 |
| ENSP00000311816 | ENSP00000359531 |
| ENSP00000311816 | ENSP00000368253 |
| ENSP00000311816 | ENSP00000380718 |
| ENSP00000311816 | ENSP00000381031 |
| ENSP00000311825 | ENSP00000313084 |
| ENSP00000311825 | ENSP00000314080 |
| ENSP00000311825 | ENSP00000323050 |
| ENSP00000311825 | ENSP00000327213 |
| ENSP00000311825 | ENSP00000327704 |
| ENSP00000311825 | ENSP00000327959 |
| ENSP00000311825 | ENSP00000333456 |
| ENSP00000311825 | ENSP00000337445 |
| ENSP00000311825 | ENSP00000348128 |
| ENSP00000311825 | ENSP00000352257 |
| ENSP00000311825 | ENSP00000352514 |
| ENSP00000311825 | ENSP00000353741 |
| ENSP00000311825 | ENSP00000353854 |
| ENSP00000311825 | ENSP00000360215 |
| ENSP00000311825 | ENSP00000360938 |
| ENSP00000311825 | ENSP00000361005 |
| ENSP00000311825 | ENSP00000361076 |

|                 |                 |
|-----------------|-----------------|
| ENSP00000311825 | ENSP00000362744 |
| ENSP00000311825 | ENSP00000365735 |
| ENSP00000311825 | ENSP00000376534 |
| ENSP00000311825 | ENSP00000379339 |
| ENSP00000311825 | ENSP00000384179 |
| ENSP00000311825 | ENSP00000391944 |
| ENSP00000311825 | ENSP00000414750 |
| ENSP00000311825 | ENSP00000417281 |
| ENSP00000311825 | ENSP00000417980 |
| ENSP00000311827 | ENSP00000312244 |
| ENSP00000311827 | ENSP00000313059 |
| ENSP00000311837 | ENSP00000328968 |
| ENSP00000311837 | ENSP00000353154 |
| ENSP00000311837 | ENSP00000382064 |
| ENSP00000311873 | ENSP00000313171 |
| ENSP00000311873 | ENSP00000317039 |
| ENSP00000311873 | ENSP00000318977 |
| ENSP00000311873 | ENSP00000321636 |
| ENSP00000311873 | ENSP00000322180 |
| ENSP00000311873 | ENSP00000322570 |
| ENSP00000311873 | ENSP00000323050 |
| ENSP00000311873 | ENSP00000323439 |
| ENSP00000311873 | ENSP00000325863 |
| ENSP00000311873 | ENSP00000329466 |
| ENSP00000311873 | ENSP00000337353 |
| ENSP00000311873 | ENSP00000340879 |
| ENSP00000311873 | ENSP00000341382 |
| ENSP00000311873 | ENSP00000343392 |
| ENSP00000311873 | ENSP00000343741 |
| ENSP00000311873 | ENSP00000347232 |
| ENSP00000311873 | ENSP00000349393 |
| ENSP00000311873 | ENSP00000351284 |
| ENSP00000311873 | ENSP00000351697 |
| ENSP00000311873 | ENSP00000352257 |
| ENSP00000311873 | ENSP00000353793 |
| ENSP00000311873 | ENSP00000354522 |
| ENSP00000311873 | ENSP00000354720 |
| ENSP00000311873 | ENSP00000354957 |
| ENSP00000311873 | ENSP00000355185 |
| ENSP00000311873 | ENSP00000358478 |
| ENSP00000311873 | ENSP00000358576 |
| ENSP00000311873 | ENSP00000358812 |
| ENSP00000311873 | ENSP00000360216 |
| ENSP00000311873 | ENSP00000360310 |
| ENSP00000311873 | ENSP00000361310 |
| ENSP00000311873 | ENSP00000363021 |

|                 |                 |
|-----------------|-----------------|
| ENSP00000311873 | ENSP00000364270 |
| ENSP00000311873 | ENSP00000367527 |
| ENSP00000311873 | ENSP00000367787 |
| ENSP00000311873 | ENSP00000368349 |
| ENSP00000311873 | ENSP00000368438 |
| ENSP00000311873 | ENSP00000369335 |
| ENSP00000311873 | ENSP00000369411 |
| ENSP00000311873 | ENSP00000370151 |
| ENSP00000311873 | ENSP00000371475 |
| ENSP00000311873 | ENSP00000372023 |
| ENSP00000311873 | ENSP00000384048 |
| ENSP00000311873 | ENSP00000402515 |
| ENSP00000311873 | ENSP00000406490 |
| ENSP00000311876 | ENSP00000327821 |
| ENSP00000311876 | ENSP00000355011 |
| ENSP00000311876 | ENSP00000361993 |
| ENSP00000311876 | ENSP00000381031 |
| ENSP00000311876 | ENSP00000386227 |
| ENSP00000311876 | ENSP00000386722 |
| ENSP00000311876 | ENSP00000387170 |
| ENSP00000311876 | ENSP00000394085 |
| ENSP00000311977 | ENSP00000314441 |
| ENSP00000311977 | ENSP00000318775 |
| ENSP00000311977 | ENSP00000324956 |
| ENSP00000311977 | ENSP00000328671 |
| ENSP00000311977 | ENSP00000356476 |
| ENSP00000311977 | ENSP00000361465 |
| ENSP00000311977 | ENSP00000365837 |
| ENSP00000311977 | ENSP00000366135 |
| ENSP00000311977 | ENSP00000369335 |
| ENSP00000311977 | ENSP00000370741 |
| ENSP00000311977 | ENSP00000388275 |
| ENSP00000311977 | ENSP00000403852 |
| ENSP00000311984 | ENSP00000312735 |
| ENSP00000311984 | ENSP00000372857 |
| ENSP00000311997 | ENSP00000362399 |
| ENSP00000311997 | ENSP00000408910 |
| ENSP00000312021 | ENSP00000414187 |
| ENSP00000312027 | ENSP00000364893 |
| ENSP00000312042 | ENSP00000313420 |
| ENSP00000312042 | ENSP00000313829 |
| ENSP00000312042 | ENSP00000315925 |
| ENSP00000312042 | ENSP00000318195 |
| ENSP00000312042 | ENSP00000327821 |
| ENSP00000312042 | ENSP00000329466 |
| ENSP00000312042 | ENSP00000346577 |

|                 |                 |
|-----------------|-----------------|
| ENSP00000312042 | ENSP00000348442 |
| ENSP00000312042 | ENSP00000351682 |
| ENSP00000312042 | ENSP00000353575 |
| ENSP00000312042 | ENSP00000354951 |
| ENSP00000312042 | ENSP00000356104 |
| ENSP00000312042 | ENSP00000356520 |
| ENSP00000312042 | ENSP00000356591 |
| ENSP00000312042 | ENSP00000357459 |
| ENSP00000312042 | ENSP00000359837 |
| ENSP00000312042 | ENSP00000360532 |
| ENSP00000312042 | ENSP00000360621 |
| ENSP00000312042 | ENSP00000361949 |
| ENSP00000312042 | ENSP00000363205 |
| ENSP00000312042 | ENSP00000363308 |
| ENSP00000312042 | ENSP00000363944 |
| ENSP00000312042 | ENSP00000364119 |
| ENSP00000312042 | ENSP00000364270 |
| ENSP00000312042 | ENSP00000364289 |
| ENSP00000312042 | ENSP00000365534 |
| ENSP00000312042 | ENSP00000365877 |
| ENSP00000312042 | ENSP00000366156 |
| ENSP00000312042 | ENSP00000366179 |
| ENSP00000312042 | ENSP00000366395 |
| ENSP00000312042 | ENSP00000368565 |
| ENSP00000312042 | ENSP00000384675 |
| ENSP00000312042 | ENSP00000387170 |
| ENSP00000312042 | ENSP00000414187 |
| ENSP00000312066 | ENSP00000314311 |
| ENSP00000312066 | ENSP00000320508 |
| ENSP00000312066 | ENSP00000329466 |
| ENSP00000312066 | ENSP00000342181 |
| ENSP00000312066 | ENSP00000343535 |
| ENSP00000312066 | ENSP00000346015 |
| ENSP00000312066 | ENSP00000356405 |
| ENSP00000312066 | ENSP00000360532 |
| ENSP00000312066 | ENSP00000403817 |
| ENSP00000312150 | ENSP00000313419 |
| ENSP00000312150 | ENSP00000313875 |
| ENSP00000312150 | ENSP00000344456 |
| ENSP00000312150 | ENSP00000350894 |
| ENSP00000312150 | ENSP00000356641 |
| ENSP00000312150 | ENSP00000357907 |
| ENSP00000312150 | ENSP00000376899 |
| ENSP00000312150 | ENSP00000377793 |
| ENSP00000312150 | ENSP00000386165 |
| ENSP00000312185 | ENSP00000312664 |

|                 |                 |
|-----------------|-----------------|
| ENSP00000312185 | ENSP00000364277 |
| ENSP0000031222  | ENSP00000345702 |
| ENSP0000031222  | ENSP00000417281 |
| ENSP0000031224  | ENSP00000378306 |
| ENSP0000031224  | ENSP00000382779 |
| ENSP0000031224  | ENSP00000313420 |
| ENSP0000031224  | ENSP00000321617 |
| ENSP0000031224  | ENSP00000322242 |
| ENSP0000031224  | ENSP00000334188 |
| ENSP0000031224  | ENSP00000340896 |
| ENSP0000031224  | ENSP00000348784 |
| ENSP0000031224  | ENSP00000349213 |
| ENSP0000031224  | ENSP00000350767 |
| ENSP0000031224  | ENSP00000351490 |
| ENSP0000031224  | ENSP00000356989 |
| ENSP0000031224  | ENSP00000360473 |
| ENSP0000031224  | ENSP00000362166 |
| ENSP0000031224  | ENSP00000368439 |
| ENSP0000031224  | ENSP00000369695 |
| ENSP0000031224  | ENSP00000371888 |
| ENSP0000031224  | ENSP00000377262 |
| ENSP0000031224  | ENSP00000386759 |
| ENSP0000031226  | ENSP00000322419 |
| ENSP0000031226  | ENSP00000332353 |
| ENSP0000031226  | ENSP00000334061 |
| ENSP0000031226  | ENSP00000335311 |
| ENSP0000031226  | ENSP00000338345 |
| ENSP0000031226  | ENSP00000339191 |
| ENSP0000031226  | ENSP00000344524 |
| ENSP0000031226  | ENSP00000352121 |
| ENSP0000031226  | ENSP00000378338 |
| ENSP0000031226  | ENSP00000405963 |
| ENSP0000031226  | ENSP00000417281 |
| ENSP0000031231  | ENSP00000315017 |
| ENSP0000031231  | ENSP00000331817 |
| ENSP0000031231  | ENSP00000333401 |
| ENSP0000031231  | ENSP00000339845 |
| ENSP0000031231  | ENSP00000343745 |
| ENSP0000031231  | ENSP00000346015 |
| ENSP0000031231  | ENSP00000346022 |
| ENSP0000031231  | ENSP00000346067 |
| ENSP0000031231  | ENSP00000357048 |
| ENSP0000031231  | ENSP00000360498 |
| ENSP0000031231  | ENSP00000363018 |
| ENSP0000031231  | ENSP00000363676 |
| ENSP0000031231  | ENSP00000375730 |



|                 |                 |
|-----------------|-----------------|
| ENSP00000312311 | ENSP00000377486 |
| ENSP00000312311 | ENSP00000417602 |
| ENSP00000312318 | ENSP00000328854 |
| ENSP00000312318 | ENSP00000329715 |
| ENSP00000312318 | ENSP00000356602 |
| ENSP00000312318 | ENSP00000359115 |
| ENSP00000312318 | ENSP00000381795 |
| ENSP00000312318 | ENSP00000416892 |
| ENSP00000312326 | ENSP00000316854 |
| ENSP00000312326 | ENSP00000354927 |
| ENSP00000312356 | ENSP00000312981 |
| ENSP00000312356 | ENSP00000314441 |
| ENSP00000312356 | ENSP00000323313 |
| ENSP00000312356 | ENSP00000327821 |
| ENSP00000312356 | ENSP00000328671 |
| ENSP00000312356 | ENSP00000333667 |
| ENSP00000312356 | ENSP00000342564 |
| ENSP00000312356 | ENSP00000353741 |
| ENSP00000312356 | ENSP00000356476 |
| ENSP00000312356 | ENSP00000356548 |
| ENSP00000312356 | ENSP00000364320 |
| ENSP00000312356 | ENSP00000365837 |
| ENSP00000312370 | ENSP00000325562 |
| ENSP00000312370 | ENSP00000361418 |
| ENSP00000312370 | ENSP00000379933 |
| ENSP00000312385 | ENSP00000313084 |
| ENSP00000312385 | ENSP00000319279 |
| ENSP00000312385 | ENSP00000338629 |
| ENSP00000312385 | ENSP00000355010 |
| ENSP00000312385 | ENSP00000359652 |
| ENSP00000312385 | ENSP00000363827 |
| ENSP00000312385 | ENSP00000365735 |
| ENSP00000312385 | ENSP00000368678 |
| ENSP00000312411 | ENSP00000343144 |
| ENSP00000312411 | ENSP00000343190 |
| ENSP00000312411 | ENSP00000349205 |
| ENSP00000312411 | ENSP00000355596 |
| ENSP00000312411 | ENSP00000356530 |
| ENSP00000312411 | ENSP00000360268 |
| ENSP00000312411 | ENSP00000364893 |
| ENSP00000312411 | ENSP00000372023 |
| ENSP00000312411 | ENSP00000375986 |
| ENSP00000312411 | ENSP00000378306 |
| ENSP00000312411 | ENSP00000399511 |
| ENSP00000312411 | ENSP00000401445 |
| ENSP00000312435 | ENSP00000313084 |

|                 |                 |
|-----------------|-----------------|
| ENSP00000312435 | ENSP00000326366 |
| ENSP00000312435 | ENSP00000339191 |
| ENSP00000312435 | ENSP00000341189 |
| ENSP00000312435 | ENSP00000353508 |
| ENSP00000312435 | ENSP00000363827 |
| ENSP00000312435 | ENSP00000368678 |
| ENSP00000312435 | ENSP00000371512 |
| ENSP00000312435 | ENSP00000380921 |
| ENSP00000312435 | ENSP00000382064 |
| ENSP00000312435 | ENSP00000391490 |
| ENSP00000312439 | ENSP00000360116 |
| ENSP00000312458 | ENSP00000318147 |
| ENSP00000312458 | ENSP00000332258 |
| ENSP00000312458 | ENSP00000346809 |
| ENSP00000312458 | ENSP00000347206 |
| ENSP00000312458 | ENSP00000350263 |
| ENSP00000312458 | ENSP00000356530 |
| ENSP00000312458 | ENSP00000356591 |
| ENSP00000312458 | ENSP00000369820 |
| ENSP00000312458 | ENSP00000401445 |
| ENSP00000312458 | ENSP00000409275 |
| ENSP00000312458 | ENSP00000415203 |
| ENSP00000312506 | ENSP00000341189 |
| ENSP00000312506 | ENSP00000354201 |
| ENSP00000312506 | ENSP00000360116 |
| ENSP00000312506 | ENSP00000370410 |
| ENSP00000312506 | ENSP00000371341 |
| ENSP00000312506 | ENSP00000381098 |
| ENSP00000312506 | ENSP00000392330 |
| ENSP00000312584 | ENSP00000355627 |
| ENSP00000312584 | ENSP00000368698 |
| ENSP00000312587 | ENSP00000322316 |
| ENSP00000312587 | ENSP00000334061 |
| ENSP00000312587 | ENSP00000355739 |
| ENSP00000312587 | ENSP00000409275 |
| ENSP00000312624 | ENSP00000347979 |
| ENSP00000312624 | ENSP00000352272 |
| ENSP00000312624 | ENSP00000417281 |
| ENSP00000312625 | ENSP00000329466 |
| ENSP00000312625 | ENSP00000355205 |
| ENSP00000312625 | ENSP00000372023 |
| ENSP00000312625 | ENSP00000379607 |
| ENSP00000312649 | ENSP00000318373 |
| ENSP00000312649 | ENSP00000348069 |
| ENSP00000312649 | ENSP00000378503 |
| ENSP00000312652 | ENSP00000330393 |

|                 |                 |
|-----------------|-----------------|
| ENSP00000312652 | ENSP00000335074 |
| ENSP00000312664 | ENSP00000313420 |
| ENSP00000312664 | ENSP00000318822 |
| ENSP00000312664 | ENSP00000327647 |
| ENSP00000312664 | ENSP00000329623 |
| ENSP00000312664 | ENSP00000330484 |
| ENSP00000312664 | ENSP00000337797 |
| ENSP00000312664 | ENSP00000343701 |
| ENSP00000312664 | ENSP00000353059 |
| ENSP00000312664 | ENSP00000354791 |
| ENSP00000312664 | ENSP00000359096 |
| ENSP00000312664 | ENSP00000359100 |
| ENSP00000312664 | ENSP00000359691 |
| ENSP00000312664 | ENSP00000363680 |
| ENSP00000312664 | ENSP00000417281 |
| ENSP00000312671 | ENSP00000359345 |
| ENSP00000312671 | ENSP00000382064 |
| ENSP00000312671 | ENSP00000384792 |
| ENSP00000312671 | ENSP00000386520 |
| ENSP00000312697 | ENSP00000320566 |
| ENSP00000312697 | ENSP00000331310 |
| ENSP00000312697 | ENSP00000341280 |
| ENSP00000312697 | ENSP00000347168 |
| ENSP00000312697 | ENSP00000347733 |
| ENSP00000312697 | ENSP00000350767 |
| ENSP00000312697 | ENSP00000351490 |
| ENSP00000312697 | ENSP00000351947 |
| ENSP00000312697 | ENSP00000352516 |
| ENSP00000312697 | ENSP00000357887 |
| ENSP00000312697 | ENSP00000359518 |
| ENSP00000312697 | ENSP00000360532 |
| ENSP00000312697 | ENSP00000362166 |
| ENSP00000312697 | ENSP00000364929 |
| ENSP00000312697 | ENSP00000366974 |
| ENSP00000312697 | ENSP00000367030 |
| ENSP00000312697 | ENSP00000367034 |
| ENSP00000312697 | ENSP00000368438 |
| ENSP00000312697 | ENSP00000370611 |
| ENSP00000312697 | ENSP00000374213 |
| ENSP00000312697 | ENSP00000376097 |
| ENSP00000312697 | ENSP00000382688 |
| ENSP00000312697 | ENSP00000396439 |
| ENSP00000312697 | ENSP00000396876 |
| ENSP00000312706 | ENSP00000405708 |
| ENSP00000312735 | ENSP00000314949 |
| ENSP00000312735 | ENSP00000315925 |

|                 |                 |
|-----------------|-----------------|
| ENSP00000312735 | ENSP00000315950 |
| ENSP00000312735 | ENSP00000317334 |
| ENSP00000312735 | ENSP00000317636 |
| ENSP00000312735 | ENSP00000318195 |
| ENSP00000312735 | ENSP00000318604 |
| ENSP00000312735 | ENSP00000318641 |
| ENSP00000312735 | ENSP00000319104 |
| ENSP00000312735 | ENSP00000320566 |
| ENSP00000312735 | ENSP00000320949 |
| ENSP00000312735 | ENSP00000323720 |
| ENSP00000312735 | ENSP00000324122 |
| ENSP00000312735 | ENSP00000324124 |
| ENSP00000312735 | ENSP00000325002 |
| ENSP00000312735 | ENSP00000326767 |
| ENSP00000312735 | ENSP00000327889 |
| ENSP00000312735 | ENSP00000329029 |
| ENSP00000312735 | ENSP00000331201 |
| ENSP00000312735 | ENSP00000337088 |
| ENSP00000312735 | ENSP00000337340 |
| ENSP00000312735 | ENSP00000337396 |
| ENSP00000312735 | ENSP00000337797 |
| ENSP00000312735 | ENSP00000340019 |
| ENSP00000312735 | ENSP00000340823 |
| ENSP00000312735 | ENSP00000341243 |
| ENSP00000312735 | ENSP00000341885 |
| ENSP00000312735 | ENSP00000342121 |
| ENSP00000312735 | ENSP00000342889 |
| ENSP00000312735 | ENSP00000344460 |
| ENSP00000312735 | ENSP00000345530 |
| ENSP00000312735 | ENSP00000346015 |
| ENSP00000312735 | ENSP00000346142 |
| ENSP00000312735 | ENSP00000347345 |
| ENSP00000312735 | ENSP00000348168 |
| ENSP00000312735 | ENSP00000349049 |
| ENSP00000312735 | ENSP00000350967 |
| ENSP00000312735 | ENSP00000352738 |
| ENSP00000312735 | ENSP00000353575 |
| ENSP00000312735 | ENSP00000353741 |
| ENSP00000312735 | ENSP00000354347 |
| ENSP00000312735 | ENSP00000354739 |
| ENSP00000312735 | ENSP00000354775 |
| ENSP00000312735 | ENSP00000355890 |
| ENSP00000312735 | ENSP00000356146 |
| ENSP00000312735 | ENSP00000356405 |
| ENSP00000312735 | ENSP00000356785 |
| ENSP00000312735 | ENSP00000357494 |

|                 |                 |
|-----------------|-----------------|
| ENSP00000312735 | ENSP00000358064 |
| ENSP00000312735 | ENSP00000358400 |
| ENSP00000312735 | ENSP00000358563 |
| ENSP00000312735 | ENSP00000359290 |
| ENSP00000312735 | ENSP00000359531 |
| ENSP00000312735 | ENSP00000361287 |
| ENSP00000312735 | ENSP00000361465 |
| ENSP00000312735 | ENSP00000361699 |
| ENSP00000312735 | ENSP00000361949 |
| ENSP00000312735 | ENSP00000361982 |
| ENSP00000312735 | ENSP00000362413 |
| ENSP00000312735 | ENSP00000362456 |
| ENSP00000312735 | ENSP00000362532 |
| ENSP00000312735 | ENSP00000362900 |
| ENSP00000312735 | ENSP00000363559 |
| ENSP00000312735 | ENSP00000363779 |
| ENSP00000312735 | ENSP00000363944 |
| ENSP00000312735 | ENSP00000365233 |
| ENSP00000312735 | ENSP00000365943 |
| ENSP00000312735 | ENSP00000366828 |
| ENSP00000312735 | ENSP00000368612 |
| ENSP00000312735 | ENSP00000368646 |
| ENSP00000312735 | ENSP00000368984 |
| ENSP00000312735 | ENSP00000369335 |
| ENSP00000312735 | ENSP00000369695 |
| ENSP00000312735 | ENSP00000369965 |
| ENSP00000312735 | ENSP00000370589 |
| ENSP00000312735 | ENSP00000371800 |
| ENSP00000312735 | ENSP00000374280 |
| ENSP00000312735 | ENSP00000376946 |
| ENSP00000312735 | ENSP00000377969 |
| ENSP00000312735 | ENSP00000379933 |
| ENSP00000312735 | ENSP00000380460 |
| ENSP00000312735 | ENSP00000380793 |
| ENSP00000312735 | ENSP00000381064 |
| ENSP00000312735 | ENSP00000385722 |
| ENSP00000312735 | ENSP00000386161 |
| ENSP00000312735 | ENSP00000386759 |
| ENSP00000312735 | ENSP00000388872 |
| ENSP00000312735 | ENSP00000401018 |
| ENSP00000312735 | ENSP00000403852 |
| ENSP00000312753 | ENSP00000313172 |
| ENSP00000312753 | ENSP00000314792 |
| ENSP00000312753 | ENSP00000317271 |
| ENSP00000312753 | ENSP00000331487 |
| ENSP00000312753 | ENSP00000340494 |

|                 |                 |
|-----------------|-----------------|
| ENSP00000312753 | ENSP00000349892 |
| ENSP00000312753 | ENSP00000359215 |
| ENSP00000312753 | ENSP00000397644 |
| ENSP00000312770 | ENSP00000368438 |
| ENSP00000312778 | ENSP00000315791 |
| ENSP00000312778 | ENSP00000323302 |
| ENSP00000312778 | ENSP00000323720 |
| ENSP00000312778 | ENSP00000326128 |
| ENSP00000312778 | ENSP00000334188 |
| ENSP00000312778 | ENSP00000336842 |
| ENSP00000312778 | ENSP00000356405 |
| ENSP00000312778 | ENSP00000356989 |
| ENSP00000312778 | ENSP00000357887 |
| ENSP00000312778 | ENSP00000362948 |
| ENSP00000312778 | ENSP00000363313 |
| ENSP00000312778 | ENSP00000363734 |
| ENSP00000312778 | ENSP00000372694 |
| ENSP00000312778 | ENSP00000374213 |
| ENSP00000312778 | ENSP00000376946 |
| ENSP00000312778 | ENSP00000386759 |
| ENSP00000312778 | ENSP00000391774 |
| ENSP00000312778 | ENSP00000412319 |
| ENSP00000312778 | ENSP00000415678 |
| ENSP00000312870 | ENSP00000322180 |
| ENSP00000312870 | ENSP00000322570 |
| ENSP00000312870 | ENSP00000340879 |
| ENSP00000312870 | ENSP00000347087 |
| ENSP00000312870 | ENSP00000347978 |
| ENSP00000312870 | ENSP00000350491 |
| ENSP00000312870 | ENSP00000351697 |
| ENSP00000312870 | ENSP00000352522 |
| ENSP00000312870 | ENSP00000353098 |
| ENSP00000312870 | ENSP00000353793 |
| ENSP00000312870 | ENSP00000359691 |
| ENSP00000312870 | ENSP00000360412 |
| ENSP00000312870 | ENSP00000364037 |
| ENSP00000312870 | ENSP00000368349 |
| ENSP00000312870 | ENSP00000369335 |
| ENSP00000312870 | ENSP00000370151 |
| ENSP00000312870 | ENSP00000371475 |
| ENSP00000312870 | ENSP00000372023 |
| ENSP00000312870 | ENSP00000377486 |
| ENSP00000312946 | ENSP00000356972 |
| ENSP00000312946 | ENSP00000360532 |
| ENSP00000312981 | ENSP00000315379 |
| ENSP00000312981 | ENSP00000324122 |

|                 |                 |
|-----------------|-----------------|
| ENSP00000312981 | ENSP00000328690 |
| ENSP00000312981 | ENSP00000332444 |
| ENSP00000312981 | ENSP00000337194 |
| ENSP00000312981 | ENSP00000359958 |
| ENSP00000312981 | ENSP00000360412 |
| ENSP00000312981 | ENSP00000360532 |
| ENSP00000312981 | ENSP00000363313 |
| ENSP00000312981 | ENSP00000364289 |
| ENSP00000312981 | ENSP00000364293 |
| ENSP00000312981 | ENSP00000370376 |
| ENSP00000312981 | ENSP00000372023 |
| ENSP00000312995 | ENSP00000343535 |
| ENSP00000312995 | ENSP00000343741 |
| ENSP00000312995 | ENSP00000350283 |
| ENSP00000312995 | ENSP00000359206 |
| ENSP00000312995 | ENSP00000368438 |
| ENSP00000312995 | ENSP00000370151 |
| ENSP00000312995 | ENSP00000378529 |
| ENSP00000313050 | ENSP00000313420 |
| ENSP00000313050 | ENSP00000313490 |
| ENSP00000313050 | ENSP00000324560 |
| ENSP00000313050 | ENSP00000339527 |
| ENSP00000313050 | ENSP00000340466 |
| ENSP00000313050 | ENSP00000343362 |
| ENSP00000313050 | ENSP00000347495 |
| ENSP00000313050 | ENSP00000349785 |
| ENSP00000313050 | ENSP00000350708 |
| ENSP00000313050 | ENSP00000353826 |
| ENSP00000313050 | ENSP00000355759 |
| ENSP00000313050 | ENSP00000362413 |
| ENSP00000313050 | ENSP00000370023 |
| ENSP00000313050 | ENSP00000370517 |
| ENSP00000313050 | ENSP00000374455 |
| ENSP00000313050 | ENSP00000377954 |
| ENSP00000313059 | ENSP00000324422 |
| ENSP00000313059 | ENSP00000327145 |
| ENSP00000313059 | ENSP00000342075 |
| ENSP00000313059 | ENSP00000350512 |
| ENSP00000313059 | ENSP00000354927 |
| ENSP00000313059 | ENSP00000355265 |
| ENSP00000313059 | ENSP00000358081 |
| ENSP00000313059 | ENSP00000358140 |
| ENSP00000313059 | ENSP00000370517 |
| ENSP00000313059 | ENSP00000371308 |
| ENSP00000313059 | ENSP00000379144 |
| ENSP00000313059 | ENSP00000388731 |

|                 |                 |
|-----------------|-----------------|
| ENSP00000313059 | ENSP00000397435 |
| ENSP00000313059 | ENSP00000399863 |
| ENSP00000313084 | ENSP00000363571 |
| ENSP00000313088 | ENSP00000345731 |
| ENSP00000313158 | ENSP00000327213 |
| ENSP00000313159 | ENSP00000341551 |
| ENSP00000313169 | ENSP00000313829 |
| ENSP00000313169 | ENSP00000327145 |
| ENSP00000313169 | ENSP00000338766 |
| ENSP00000313169 | ENSP00000350297 |
| ENSP00000313169 | ENSP00000367398 |
| ENSP00000313169 | ENSP00000369257 |
| ENSP00000313171 | ENSP00000313851 |
| ENSP00000313171 | ENSP00000318977 |
| ENSP00000313171 | ENSP00000321636 |
| ENSP00000313171 | ENSP00000322180 |
| ENSP00000313171 | ENSP00000322242 |
| ENSP00000313171 | ENSP00000323439 |
| ENSP00000313171 | ENSP00000325677 |
| ENSP00000313171 | ENSP00000336606 |
| ENSP00000313171 | ENSP00000340879 |
| ENSP00000313171 | ENSP00000342434 |
| ENSP00000313171 | ENSP00000343392 |
| ENSP00000313171 | ENSP00000343526 |
| ENSP00000313171 | ENSP00000343741 |
| ENSP00000313171 | ENSP00000343745 |
| ENSP00000313171 | ENSP00000347719 |
| ENSP00000313171 | ENSP00000350011 |
| ENSP00000313171 | ENSP00000350491 |
| ENSP00000313171 | ENSP00000351284 |
| ENSP00000313171 | ENSP00000352257 |
| ENSP00000313171 | ENSP00000352738 |
| ENSP00000313171 | ENSP00000353793 |
| ENSP00000313171 | ENSP00000354522 |
| ENSP00000313171 | ENSP00000354720 |
| ENSP00000313171 | ENSP00000355759 |
| ENSP00000313171 | ENSP00000357602 |
| ENSP00000313171 | ENSP00000360621 |
| ENSP00000313171 | ENSP00000363021 |
| ENSP00000313171 | ENSP00000368438 |
| ENSP00000313171 | ENSP00000368591 |
| ENSP00000313171 | ENSP00000368976 |
| ENSP00000313171 | ENSP00000369335 |
| ENSP00000313171 | ENSP00000369411 |
| ENSP00000313171 | ENSP00000370150 |
| ENSP00000313171 | ENSP00000371419 |



|                 |                 |
|-----------------|-----------------|
| ENSP00000313171 | ENSP00000371475 |
| ENSP00000313171 | ENSP00000372023 |
| ENSP00000313171 | ENSP00000374213 |
| ENSP00000313171 | ENSP00000375809 |
| ENSP00000313171 | ENSP00000377384 |
| ENSP00000313171 | ENSP00000377793 |
| ENSP00000313171 | ENSP00000380504 |
| ENSP00000313171 | ENSP00000381657 |
| ENSP00000313171 | ENSP00000382562 |
| ENSP00000313171 | ENSP00000396704 |
| ENSP00000313172 | ENSP00000339299 |
| ENSP00000313243 | ENSP00000351284 |
| ENSP00000313243 | ENSP00000358812 |
| ENSP00000313243 | ENSP00000380460 |
| ENSP00000313309 | ENSP00000364749 |
| ENSP00000313350 | ENSP00000317636 |
| ENSP00000313350 | ENSP00000321636 |
| ENSP00000313350 | ENSP00000322570 |
| ENSP00000313350 | ENSP00000335557 |
| ENSP00000313350 | ENSP00000337839 |
| ENSP00000313350 | ENSP00000340305 |
| ENSP00000313350 | ENSP00000347232 |
| ENSP00000313350 | ENSP00000349142 |
| ENSP00000313350 | ENSP00000350491 |
| ENSP00000313350 | ENSP00000351284 |
| ENSP00000313350 | ENSP00000351697 |
| ENSP00000313350 | ENSP00000353332 |
| ENSP00000313350 | ENSP00000353622 |
| ENSP00000313350 | ENSP00000354522 |
| ENSP00000313350 | ENSP00000356405 |
| ENSP00000313350 | ENSP00000357907 |
| ENSP00000313350 | ENSP00000361076 |
| ENSP00000313350 | ENSP00000361310 |
| ENSP00000313350 | ENSP00000362900 |
| ENSP00000313350 | ENSP00000364126 |
| ENSP00000313350 | ENSP00000364815 |
| ENSP00000313350 | ENSP00000366135 |
| ENSP00000313350 | ENSP00000368349 |
| ENSP00000313350 | ENSP00000374280 |
| ENSP00000313350 | ENSP00000375809 |
| ENSP00000313350 | ENSP00000380504 |
| ENSP00000313350 | ENSP00000401121 |
| ENSP00000313350 | ENSP00000403359 |
| ENSP00000313350 | ENSP00000415316 |
| ENSP00000313391 | ENSP00000318921 |
| ENSP00000313391 | ENSP00000337163 |

|                 |                 |
|-----------------|-----------------|
| ENSP00000313391 | ENSP00000341737 |
| ENSP00000313391 | ENSP00000348554 |
| ENSP00000313391 | ENSP00000355809 |
| ENSP00000313391 | ENSP00000356595 |
| ENSP00000313391 | ENSP00000357494 |
| ENSP00000313391 | ENSP00000358994 |
| ENSP00000313391 | ENSP00000360798 |
| ENSP00000313391 | ENSP00000363163 |
| ENSP00000313391 | ENSP00000365891 |
| ENSP00000313391 | ENSP00000366936 |
| ENSP00000313391 | ENSP00000370719 |
| ENSP00000313391 | ENSP00000380921 |
| ENSP00000313419 | ENSP00000360916 |
| ENSP00000313419 | ENSP00000364898 |
| ENSP00000313419 | ENSP00000376544 |
| ENSP00000313419 | ENSP00000384675 |
| ENSP00000313420 | ENSP00000317636 |
| ENSP00000313420 | ENSP00000323050 |
| ENSP00000313420 | ENSP00000323099 |
| ENSP00000313420 | ENSP00000325863 |
| ENSP00000313420 | ENSP00000329357 |
| ENSP00000313420 | ENSP00000329466 |
| ENSP00000313420 | ENSP00000331310 |
| ENSP00000313420 | ENSP00000333873 |
| ENSP00000313420 | ENSP00000336868 |
| ENSP00000313420 | ENSP00000337127 |
| ENSP00000313420 | ENSP00000337797 |
| ENSP00000313420 | ENSP00000341268 |
| ENSP00000313420 | ENSP00000342011 |
| ENSP00000313420 | ENSP00000344537 |
| ENSP00000313420 | ENSP00000346566 |
| ENSP00000313420 | ENSP00000348107 |
| ENSP00000313420 | ENSP00000348784 |
| ENSP00000313420 | ENSP00000349205 |
| ENSP00000313420 | ENSP00000349393 |
| ENSP00000313420 | ENSP00000350199 |
| ENSP00000313420 | ENSP00000350283 |
| ENSP00000313420 | ENSP00000350491 |
| ENSP00000313420 | ENSP00000351284 |
| ENSP00000313420 | ENSP00000351894 |
| ENSP00000313420 | ENSP00000351947 |
| ENSP00000313420 | ENSP00000352121 |
| ENSP00000313420 | ENSP00000352257 |
| ENSP00000313420 | ENSP00000353073 |
| ENSP00000313420 | ENSP00000353793 |
| ENSP00000313420 | ENSP00000353971 |

|                 |                 |
|-----------------|-----------------|
| ENSP00000313420 | ENSP00000354522 |
| ENSP00000313420 | ENSP00000355011 |
| ENSP00000313420 | ENSP00000355090 |
| ENSP00000313420 | ENSP00000355759 |
| ENSP00000313420 | ENSP00000356505 |
| ENSP00000313420 | ENSP00000356520 |
| ENSP00000313420 | ENSP00000357283 |
| ENSP00000313420 | ENSP00000360310 |
| ENSP00000313420 | ENSP00000360532 |
| ENSP00000313420 | ENSP00000361014 |
| ENSP00000313420 | ENSP00000362314 |
| ENSP00000313420 | ENSP00000362546 |
| ENSP00000313420 | ENSP00000363021 |
| ENSP00000313420 | ENSP00000363745 |
| ENSP00000313420 | ENSP00000364119 |
| ENSP00000313420 | ENSP00000364204 |
| ENSP00000313420 | ENSP00000364270 |
| ENSP00000313420 | ENSP00000367527 |
| ENSP00000313420 | ENSP00000368438 |
| ENSP00000313420 | ENSP00000369335 |
| ENSP00000313420 | ENSP00000370151 |
| ENSP00000313420 | ENSP00000370421 |
| ENSP00000313420 | ENSP00000372023 |
| ENSP00000313420 | ENSP00000373060 |
| ENSP00000313420 | ENSP00000379093 |
| ENSP00000313420 | ENSP00000404121 |
| ENSP00000313422 | ENSP00000323339 |
| ENSP00000313422 | ENSP00000342755 |
| ENSP00000313422 | ENSP00000362546 |
| ENSP00000313432 | ENSP00000321259 |
| ENSP00000313432 | ENSP00000337353 |
| ENSP00000313432 | ENSP00000360286 |
| ENSP00000313432 | ENSP00000361699 |
| ENSP00000313432 | ENSP00000379678 |
| ENSP00000313490 | ENSP00000314129 |
| ENSP00000313490 | ENSP00000324560 |
| ENSP00000313490 | ENSP00000329466 |
| ENSP00000313490 | ENSP00000333019 |
| ENSP00000313490 | ENSP00000337839 |
| ENSP00000313490 | ENSP00000341692 |
| ENSP00000313490 | ENSP00000343535 |
| ENSP00000313490 | ENSP00000366434 |
| ENSP00000313490 | ENSP00000378782 |
| ENSP00000313490 | ENSP00000382595 |
| ENSP00000313490 | ENSP00000400312 |
| ENSP00000313490 | ENSP00000415434 |

|                 |                 |
|-----------------|-----------------|
| ENSP00000313601 | ENSP00000349658 |
| ENSP00000313601 | ENSP00000382177 |
| ENSP00000313601 | ENSP00000399968 |
| ENSP00000313603 | ENSP00000348877 |
| ENSP00000313603 | ENSP00000352522 |
| ENSP00000313603 | ENSP00000353741 |
| ENSP00000313603 | ENSP00000354125 |
| ENSP00000313603 | ENSP00000354347 |
| ENSP00000313603 | ENSP00000358140 |
| ENSP00000313603 | ENSP00000359345 |
| ENSP00000313603 | ENSP00000361287 |
| ENSP00000313603 | ENSP00000363559 |
| ENSP00000313603 | ENSP00000365025 |
| ENSP00000313603 | ENSP00000365837 |
| ENSP00000313603 | ENSP00000375809 |
| ENSP00000313603 | ENSP00000377944 |
| ENSP00000313603 | ENSP00000391944 |
| ENSP00000313674 | ENSP00000318861 |
| ENSP00000313674 | ENSP00000319341 |
| ENSP00000313674 | ENSP00000323302 |
| ENSP00000313674 | ENSP00000324122 |
| ENSP00000313674 | ENSP00000325448 |
| ENSP00000313674 | ENSP00000326806 |
| ENSP00000313674 | ENSP00000331087 |
| ENSP00000313674 | ENSP00000332103 |
| ENSP00000313674 | ENSP00000339881 |
| ENSP00000313674 | ENSP00000342374 |
| ENSP00000313674 | ENSP00000348010 |
| ENSP00000313674 | ENSP00000362110 |
| ENSP00000313674 | ENSP00000363313 |
| ENSP00000313674 | ENSP00000376973 |
| ENSP00000313674 | ENSP00000387006 |
| ENSP00000313674 | ENSP00000401566 |
| ENSP00000313674 | ENSP00000410758 |
| ENSP00000313674 | ENSP00000412566 |
| ENSP00000313691 | ENSP00000345702 |
| ENSP00000313691 | ENSP00000356811 |
| ENSP00000313691 | ENSP00000363999 |
| ENSP00000313752 | ENSP00000320885 |
| ENSP00000313759 | ENSP00000350249 |
| ENSP00000313759 | ENSP00000363021 |
| ENSP00000313822 | ENSP00000361048 |
| ENSP00000313829 | ENSP00000315659 |
| ENSP00000313829 | ENSP00000316032 |
| ENSP00000313829 | ENSP00000316845 |
| ENSP00000313829 | ENSP00000316879 |

|                 |                 |
|-----------------|-----------------|
| ENSP00000313829 | ENSP00000322608 |
| ENSP00000313829 | ENSP00000326261 |
| ENSP00000313829 | ENSP00000339186 |
| ENSP00000313829 | ENSP00000339245 |
| ENSP00000313829 | ENSP00000340836 |
| ENSP00000313829 | ENSP00000345731 |
| ENSP00000313829 | ENSP00000345824 |
| ENSP00000313829 | ENSP00000348215 |
| ENSP00000313829 | ENSP00000348602 |
| ENSP00000313829 | ENSP00000349594 |
| ENSP00000313829 | ENSP00000350249 |
| ENSP00000313829 | ENSP00000351947 |
| ENSP00000313829 | ENSP00000353735 |
| ENSP00000313829 | ENSP00000355177 |
| ENSP00000313829 | ENSP00000356437 |
| ENSP00000313829 | ENSP00000356520 |
| ENSP00000313829 | ENSP00000356774 |
| ENSP00000313829 | ENSP00000358413 |
| ENSP00000313829 | ENSP00000358770 |
| ENSP00000313829 | ENSP00000360532 |
| ENSP00000313829 | ENSP00000360916 |
| ENSP00000313829 | ENSP00000362993 |
| ENSP00000313829 | ENSP00000363349 |
| ENSP00000313829 | ENSP00000365439 |
| ENSP00000313829 | ENSP00000366135 |
| ENSP00000313829 | ENSP00000366843 |
| ENSP00000313829 | ENSP00000368801 |
| ENSP00000313829 | ENSP00000370719 |
| ENSP00000313829 | ENSP00000378350 |
| ENSP00000313829 | ENSP00000379607 |
| ENSP00000313829 | ENSP00000380921 |
| ENSP00000313829 | ENSP00000384490 |
| ENSP00000313829 | ENSP00000387170 |
| ENSP00000313829 | ENSP00000388731 |
| ENSP00000313851 | ENSP00000327197 |
| ENSP00000313851 | ENSP00000329466 |
| ENSP00000313851 | ENSP00000346725 |
| ENSP00000313851 | ENSP00000354720 |
| ENSP00000313851 | ENSP00000358497 |
| ENSP00000313851 | ENSP00000360310 |
| ENSP00000313851 | ENSP00000361310 |
| ENSP00000313851 | ENSP00000361875 |
| ENSP00000313851 | ENSP00000362334 |
| ENSP00000313851 | ENSP00000369411 |
| ENSP00000313851 | ENSP00000372689 |
| ENSP00000313851 | ENSP00000377655 |

|                 |                 |
|-----------------|-----------------|
| ENSP00000313851 | ENSP00000394791 |
| ENSP00000313851 | ENSP00000396704 |
| ENSP00000313851 | ENSP00000402527 |
| ENSP00000313875 | ENSP00000348278 |
| ENSP00000313881 | ENSP00000315950 |
| ENSP00000313881 | ENSP00000340305 |
| ENSP00000313881 | ENSP00000347836 |
| ENSP00000313881 | ENSP00000360116 |
| ENSP00000313881 | ENSP00000391685 |
| ENSP00000313881 | ENSP00000417281 |
| ENSP00000313921 | ENSP00000318604 |
| ENSP00000313921 | ENSP00000330836 |
| ENSP00000313921 | ENSP00000337443 |
| ENSP00000313921 | ENSP00000347324 |
| ENSP00000313921 | ENSP00000359976 |
| ENSP00000313921 | ENSP00000361287 |
| ENSP00000313921 | ENSP00000373477 |
| ENSP00000313933 | ENSP00000341680 |
| ENSP00000313933 | ENSP00000360532 |
| ENSP00000313933 | ENSP00000396620 |
| ENSP00000313953 | ENSP00000343535 |
| ENSP00000313953 | ENSP00000346453 |
| ENSP00000313953 | ENSP00000354347 |
| ENSP00000313953 | ENSP00000362110 |
| ENSP00000313953 | ENSP00000397435 |
| ENSP00000314004 | ENSP00000318775 |
| ENSP00000314004 | ENSP00000330408 |
| ENSP00000314004 | ENSP00000337340 |
| ENSP00000314004 | ENSP00000339109 |
| ENSP00000314004 | ENSP00000344936 |
| ENSP00000314004 | ENSP00000345917 |
| ENSP00000314004 | ENSP00000346240 |
| ENSP00000314004 | ENSP00000348554 |
| ENSP00000314004 | ENSP00000351947 |
| ENSP00000314004 | ENSP00000355560 |
| ENSP00000314004 | ENSP00000356972 |
| ENSP00000314004 | ENSP00000360532 |
| ENSP00000314004 | ENSP00000363322 |
| ENSP00000314004 | ENSP00000367208 |
| ENSP00000314004 | ENSP00000378350 |
| ENSP00000314004 | ENSP00000378529 |
| ENSP00000314004 | ENSP00000386156 |
| ENSP00000314004 | ENSP00000394394 |
| ENSP00000314036 | ENSP00000354876 |
| ENSP00000314036 | ENSP00000355890 |
| ENSP00000314036 | ENSP00000355968 |

|                 |                 |
|-----------------|-----------------|
| ENSP00000314036 | ENSP00000357998 |
| ENSP00000314036 | ENSP00000359067 |
| ENSP00000314036 | ENSP00000364188 |
| ENSP00000314073 | ENSP00000387262 |
| ENSP00000314080 | ENSP00000316578 |
| ENSP00000314080 | ENSP00000320485 |
| ENSP00000314080 | ENSP00000333633 |
| ENSP00000314080 | ENSP00000344456 |
| ENSP00000314080 | ENSP00000358404 |
| ENSP00000314080 | ENSP00000362592 |
| ENSP00000314080 | ENSP00000369716 |
| ENSP00000314129 | ENSP00000323967 |
| ENSP00000314129 | ENSP00000336724 |
| ENSP00000314129 | ENSP00000340466 |
| ENSP00000314129 | ENSP00000341551 |
| ENSP00000314129 | ENSP00000342056 |
| ENSP00000314129 | ENSP00000355890 |
| ENSP00000314129 | ENSP00000358140 |
| ENSP00000314129 | ENSP00000362688 |
| ENSP00000314129 | ENSP00000364591 |
| ENSP00000314129 | ENSP00000374280 |
| ENSP00000314129 | ENSP00000385746 |
| ENSP00000314129 | ENSP00000397441 |
| ENSP00000314129 | ENSP00000401121 |
| ENSP00000314129 | ENSP00000403359 |
| ENSP00000314132 | ENSP00000353059 |
| ENSP00000314132 | ENSP00000358022 |
| ENSP00000314193 | ENSP00000315674 |
| ENSP00000314193 | ENSP00000321449 |
| ENSP00000314193 | ENSP00000326981 |
| ENSP00000314193 | ENSP00000327179 |
| ENSP00000314193 | ENSP00000328854 |
| ENSP00000314193 | ENSP00000329466 |
| ENSP00000314193 | ENSP00000339095 |
| ENSP00000314193 | ENSP00000339145 |
| ENSP00000314193 | ENSP00000353246 |
| ENSP00000314193 | ENSP00000354040 |
| ENSP00000314193 | ENSP00000354125 |
| ENSP00000314193 | ENSP00000355471 |
| ENSP00000314193 | ENSP00000355541 |
| ENSP00000314193 | ENSP00000358812 |
| ENSP00000314193 | ENSP00000360031 |
| ENSP00000314193 | ENSP00000360286 |
| ENSP00000314193 | ENSP00000363313 |
| ENSP00000314193 | ENSP00000363642 |
| ENSP00000314193 | ENSP00000363746 |

|                 |                 |
|-----------------|-----------------|
| ENSP00000314193 | ENSP00000370258 |
| ENSP00000314193 | ENSP00000370589 |
| ENSP00000314193 | ENSP00000370968 |
| ENSP00000314193 | ENSP00000371101 |
| ENSP00000314193 | ENSP00000372695 |
| ENSP00000314193 | ENSP00000379888 |
| ENSP00000314193 | ENSP00000384302 |
| ENSP00000314193 | ENSP00000387006 |
| ENSP00000314193 | ENSP00000399454 |
| ENSP00000314193 | ENSP00000402869 |
| ENSP00000314193 | ENSP00000405614 |
| ENSP00000314193 | ENSP00000414321 |
| ENSP00000314196 | ENSP00000337463 |
| ENSP00000314196 | ENSP00000382723 |
| ENSP00000314196 | ENSP00000389516 |
| ENSP00000314196 | ENSP00000395863 |
| ENSP00000314196 | ENSP00000401287 |
| ENSP00000314196 | ENSP00000405864 |
| ENSP00000314196 | ENSP00000412805 |
| ENSP00000314311 | ENSP00000314348 |
| ENSP00000314311 | ENSP00000314441 |
| ENSP00000314311 | ENSP00000314949 |
| ENSP00000314311 | ENSP00000316879 |
| ENSP00000314311 | ENSP00000317992 |
| ENSP00000314311 | ENSP00000318646 |
| ENSP00000314311 | ENSP00000322396 |
| ENSP00000314311 | ENSP00000322570 |
| ENSP00000314311 | ENSP00000323856 |
| ENSP00000314311 | ENSP00000324122 |
| ENSP00000314311 | ENSP00000325677 |
| ENSP00000314311 | ENSP00000326411 |
| ENSP00000314311 | ENSP00000326514 |
| ENSP00000314311 | ENSP00000326981 |
| ENSP00000314311 | ENSP00000327821 |
| ENSP00000314311 | ENSP00000328690 |
| ENSP00000314311 | ENSP00000328773 |
| ENSP00000314311 | ENSP00000329466 |
| ENSP00000314311 | ENSP00000335321 |
| ENSP00000314311 | ENSP00000337405 |
| ENSP00000314311 | ENSP00000337839 |
| ENSP00000314311 | ENSP00000338862 |
| ENSP00000314311 | ENSP00000339095 |
| ENSP00000314311 | ENSP00000340281 |
| ENSP00000314311 | ENSP00000342181 |
| ENSP00000314311 | ENSP00000343081 |
| ENSP00000314311 | ENSP00000348010 |



|                 |                 |
|-----------------|-----------------|
| ENSP00000314311 | ENSP00000348722 |
| ENSP00000314311 | ENSP00000351697 |
| ENSP00000314311 | ENSP00000351885 |
| ENSP00000314311 | ENSP00000353246 |
| ENSP00000314311 | ENSP00000354125 |
| ENSP00000314311 | ENSP00000354673 |
| ENSP00000314311 | ENSP00000355205 |
| ENSP00000314311 | ENSP00000356405 |
| ENSP00000314311 | ENSP00000356476 |
| ENSP00000314311 | ENSP00000356989 |
| ENSP00000314311 | ENSP00000357748 |
| ENSP00000314311 | ENSP00000358563 |
| ENSP00000314311 | ENSP00000359321 |
| ENSP00000314311 | ENSP00000359345 |
| ENSP00000314311 | ENSP00000361465 |
| ENSP00000314311 | ENSP00000361982 |
| ENSP00000314311 | ENSP00000362105 |
| ENSP00000314311 | ENSP00000362110 |
| ENSP00000314311 | ENSP00000362576 |
| ENSP00000314311 | ENSP00000362744 |
| ENSP00000314311 | ENSP00000363313 |
| ENSP00000314311 | ENSP00000363384 |
| ENSP00000314311 | ENSP00000363559 |
| ENSP00000314311 | ENSP00000363779 |
| ENSP00000314311 | ENSP00000363944 |
| ENSP00000314311 | ENSP00000364289 |
| ENSP00000314311 | ENSP00000364320 |
| ENSP00000314311 | ENSP00000364839 |
| ENSP00000314311 | ENSP00000365837 |
| ENSP00000314311 | ENSP00000366135 |
| ENSP00000314311 | ENSP00000366557 |
| ENSP00000314311 | ENSP00000367029 |
| ENSP00000314311 | ENSP00000368438 |
| ENSP00000314311 | ENSP00000368565 |
| ENSP00000314311 | ENSP00000368927 |
| ENSP00000314311 | ENSP00000369042 |
| ENSP00000314311 | ENSP00000370589 |
| ENSP00000314311 | ENSP00000374213 |
| ENSP00000314311 | ENSP00000374399 |
| ENSP00000314311 | ENSP00000376204 |
| ENSP00000314311 | ENSP00000376973 |
| ENSP00000314311 | ENSP00000379888 |
| ENSP00000314311 | ENSP00000380460 |
| ENSP00000314311 | ENSP00000382392 |
| ENSP00000314311 | ENSP00000387006 |
| ENSP00000314311 | ENSP00000393275 |

|                 |                 |
|-----------------|-----------------|
| ENSP00000314311 | ENSP00000401371 |
| ENSP00000314311 | ENSP00000402338 |
| ENSP00000314311 | ENSP00000403852 |
| ENSP00000314311 | ENSP00000410758 |
| ENSP00000314311 | ENSP00000417229 |
| ENSP00000314348 | ENSP00000315674 |
| ENSP00000314348 | ENSP00000315791 |
| ENSP00000314348 | ENSP00000316032 |
| ENSP00000314348 | ENSP00000317992 |
| ENSP00000314348 | ENSP00000318195 |
| ENSP00000314348 | ENSP00000320917 |
| ENSP00000314348 | ENSP00000322396 |
| ENSP00000314348 | ENSP00000323858 |
| ENSP00000314348 | ENSP00000325377 |
| ENSP00000314348 | ENSP00000328690 |
| ENSP00000314348 | ENSP00000329466 |
| ENSP00000314348 | ENSP00000331817 |
| ENSP00000314348 | ENSP00000332444 |
| ENSP00000314348 | ENSP00000336752 |
| ENSP00000314348 | ENSP00000338573 |
| ENSP00000314348 | ENSP00000338862 |
| ENSP00000314348 | ENSP00000339095 |
| ENSP00000314348 | ENSP00000339145 |
| ENSP00000314348 | ENSP00000339795 |
| ENSP00000314348 | ENSP00000342181 |
| ENSP00000314348 | ENSP00000343557 |
| ENSP00000314348 | ENSP00000343885 |
| ENSP00000314348 | ENSP00000345096 |
| ENSP00000314348 | ENSP00000346022 |
| ENSP00000314348 | ENSP00000346050 |
| ENSP00000314348 | ENSP00000346725 |
| ENSP00000314348 | ENSP00000352021 |
| ENSP00000314348 | ENSP00000352738 |
| ENSP00000314348 | ENSP00000353246 |
| ENSP00000314348 | ENSP00000354040 |
| ENSP00000314348 | ENSP00000355541 |
| ENSP00000314348 | ENSP00000355899 |
| ENSP00000314348 | ENSP00000358400 |
| ENSP00000314348 | ENSP00000358563 |
| ENSP00000314348 | ENSP00000358812 |
| ENSP00000314348 | ENSP00000359345 |
| ENSP00000314348 | ENSP00000359688 |
| ENSP00000314348 | ENSP00000360031 |
| ENSP00000314348 | ENSP00000360412 |
| ENSP00000314348 | ENSP00000360828 |
| ENSP00000314348 | ENSP00000361076 |

|                 |                 |
|-----------------|-----------------|
| ENSP00000314348 | ENSP00000361232 |
| ENSP00000314348 | ENSP00000361465 |
| ENSP00000314348 | ENSP00000361949 |
| ENSP00000314348 | ENSP00000362153 |
| ENSP00000314348 | ENSP00000362344 |
| ENSP00000314348 | ENSP00000362744 |
| ENSP00000314348 | ENSP00000363018 |
| ENSP00000314348 | ENSP00000363559 |
| ENSP00000314348 | ENSP00000363676 |
| ENSP00000314348 | ENSP00000363746 |
| ENSP00000314348 | ENSP00000363944 |
| ENSP00000314348 | ENSP00000364320 |
| ENSP00000314348 | ENSP00000364543 |
| ENSP00000314348 | ENSP00000366135 |
| ENSP00000314348 | ENSP00000368887 |
| ENSP00000314348 | ENSP00000370589 |
| ENSP00000314348 | ENSP00000371101 |
| ENSP00000314348 | ENSP00000372695 |
| ENSP00000314348 | ENSP00000372827 |
| ENSP00000314348 | ENSP00000375730 |
| ENSP00000314348 | ENSP00000377865 |
| ENSP00000314348 | ENSP00000379888 |
| ENSP00000314348 | ENSP00000380982 |
| ENSP00000314348 | ENSP00000382392 |
| ENSP00000314348 | ENSP00000384302 |
| ENSP00000314348 | ENSP00000388340 |
| ENSP00000314348 | ENSP00000389103 |
| ENSP00000314348 | ENSP00000393953 |
| ENSP00000314348 | ENSP00000394400 |
| ENSP00000314348 | ENSP00000399454 |
| ENSP00000314348 | ENSP00000399530 |
| ENSP00000314348 | ENSP00000400626 |
| ENSP00000314348 | ENSP00000401371 |
| ENSP00000314348 | ENSP00000402338 |
| ENSP00000314348 | ENSP00000402869 |
| ENSP00000314348 | ENSP00000405614 |
| ENSP00000314348 | ENSP00000412310 |
| ENSP00000314348 | ENSP00000417229 |
| ENSP00000314380 | ENSP00000348069 |
| ENSP00000314380 | ENSP00000354876 |
| ENSP00000314380 | ENSP00000364349 |
| ENSP00000314380 | ENSP00000404725 |
| ENSP00000314380 | ENSP00000404814 |
| ENSP00000314396 | ENSP00000364289 |
| ENSP00000314420 | ENSP00000349748 |
| ENSP00000314420 | ENSP00000351407 |

|                 |                 |
|-----------------|-----------------|
| ENSP00000314420 | ENSP00000353622 |
| ENSP00000314420 | ENSP00000355146 |
| ENSP00000314420 | ENSP00000359206 |
| ENSP00000314420 | ENSP00000381031 |
| ENSP00000314425 | ENSP00000321345 |
| ENSP00000314440 | ENSP00000368140 |
| ENSP00000314441 | ENSP00000318195 |
| ENSP00000314441 | ENSP00000321810 |
| ENSP00000314441 | ENSP00000327821 |
| ENSP00000314441 | ENSP00000328671 |
| ENSP00000314441 | ENSP00000331817 |
| ENSP00000314441 | ENSP00000343081 |
| ENSP00000314441 | ENSP00000348722 |
| ENSP00000314441 | ENSP00000355890 |
| ENSP00000314441 | ENSP00000364320 |
| ENSP00000314441 | ENSP00000365837 |
| ENSP00000314441 | ENSP00000366135 |
| ENSP00000314441 | ENSP00000366519 |
| ENSP00000314441 | ENSP00000371201 |
| ENSP00000314441 | ENSP00000382392 |
| ENSP00000314441 | ENSP00000384302 |
| ENSP00000314441 | ENSP00000388464 |
| ENSP00000314441 | ENSP00000419740 |
| ENSP00000314480 | ENSP00000365735 |
| ENSP00000314480 | ENSP00000372023 |
| ENSP00000314491 | ENSP00000315859 |
| ENSP00000314491 | ENSP00000321706 |
| ENSP00000314491 | ENSP00000336868 |
| ENSP00000314491 | ENSP00000339845 |
| ENSP00000314491 | ENSP00000343745 |
| ENSP00000314491 | ENSP00000360916 |
| ENSP00000314491 | ENSP00000365439 |
| ENSP00000314491 | ENSP00000369716 |
| ENSP00000314491 | ENSP00000379607 |
| ENSP00000314499 | ENSP00000314615 |
| ENSP00000314499 | ENSP00000318374 |
| ENSP00000314499 | ENSP00000320543 |
| ENSP00000314499 | ENSP00000325002 |
| ENSP00000314499 | ENSP00000344055 |
| ENSP00000314499 | ENSP00000347169 |
| ENSP00000314499 | ENSP00000348020 |
| ENSP00000314499 | ENSP00000348442 |
| ENSP00000314499 | ENSP00000349824 |
| ENSP00000314499 | ENSP00000350199 |
| ENSP00000314499 | ENSP00000351926 |
| ENSP00000314499 | ENSP00000356146 |

|                 |                 |
|-----------------|-----------------|
| ENSP00000314499 | ENSP00000360183 |
| ENSP00000314499 | ENSP00000365891 |
| ENSP00000314499 | ENSP00000366179 |
| ENSP00000314499 | ENSP00000369099 |
| ENSP00000314499 | ENSP00000369335 |
| ENSP00000314499 | ENSP00000371451 |
| ENSP00000314499 | ENSP00000373700 |
| ENSP00000314499 | ENSP00000375986 |
| ENSP00000314499 | ENSP00000377769 |
| ENSP00000314499 | ENSP00000378605 |
| ENSP00000314499 | ENSP00000388340 |
| ENSP00000314499 | ENSP00000397441 |
| ENSP00000314499 | ENSP00000402240 |
| ENSP00000314508 | ENSP00000317334 |
| ENSP00000314508 | ENSP00000333298 |
| ENSP00000314508 | ENSP00000355865 |
| ENSP00000314508 | ENSP00000378394 |
| ENSP00000314518 | ENSP00000357484 |
| ENSP00000314544 | ENSP00000360532 |
| ENSP00000314615 | ENSP00000325002 |
| ENSP00000314615 | ENSP00000325863 |
| ENSP00000314615 | ENSP00000327309 |
| ENSP00000314615 | ENSP00000328464 |
| ENSP00000314615 | ENSP00000329468 |
| ENSP00000314615 | ENSP00000336724 |
| ENSP00000314615 | ENSP00000339826 |
| ENSP00000314615 | ENSP00000341189 |
| ENSP00000314615 | ENSP00000342793 |
| ENSP00000314615 | ENSP00000346733 |
| ENSP00000314615 | ENSP00000348163 |
| ENSP00000314615 | ENSP00000350297 |
| ENSP00000314615 | ENSP00000350512 |
| ENSP00000314615 | ENSP00000354972 |
| ENSP00000314615 | ENSP00000355261 |
| ENSP00000314615 | ENSP00000356146 |
| ENSP00000314615 | ENSP00000357048 |
| ENSP00000314615 | ENSP00000359067 |
| ENSP00000314615 | ENSP00000359484 |
| ENSP00000314615 | ENSP00000359518 |
| ENSP00000314615 | ENSP00000360183 |
| ENSP00000314615 | ENSP00000363349 |
| ENSP00000314615 | ENSP00000363676 |
| ENSP00000314615 | ENSP00000368959 |
| ENSP00000314615 | ENSP00000369411 |
| ENSP00000314615 | ENSP00000369860 |
| ENSP00000314615 | ENSP00000376268 |

|                 |                 |
|-----------------|-----------------|
| ENSP00000314615 | ENSP00000376871 |
| ENSP00000314615 | ENSP00000377769 |
| ENSP00000314615 | ENSP00000402240 |
| ENSP00000314615 | ENSP00000403397 |
| ENSP00000314615 | ENSP00000408236 |
| ENSP00000314615 | ENSP00000419628 |
| ENSP00000314733 | ENSP00000320768 |
| ENSP00000314733 | ENSP00000339191 |
| ENSP00000314733 | ENSP00000341030 |
| ENSP00000314733 | ENSP00000347184 |
| ENSP00000314733 | ENSP00000355028 |
| ENSP00000314733 | ENSP00000358997 |
| ENSP00000314733 | ENSP00000363089 |
| ENSP00000314733 | ENSP00000364847 |
| ENSP00000314733 | ENSP00000368818 |
| ENSP00000314733 | ENSP00000370150 |
| ENSP00000314733 | ENSP00000392466 |
| ENSP00000314733 | ENSP00000417587 |
| ENSP00000314733 | ENSP00000419235 |
| ENSP00000314792 | ENSP00000354791 |
| ENSP00000314792 | ENSP00000366557 |
| ENSP00000314792 | ENSP00000376973 |
| ENSP00000314792 | ENSP00000384573 |
| ENSP00000314792 | ENSP00000408910 |
| ENSP00000314837 | ENSP00000316130 |
| ENSP00000314837 | ENSP00000334002 |
| ENSP00000314837 | ENSP00000347314 |
| ENSP00000314837 | ENSP00000362334 |
| ENSP00000314837 | ENSP00000366513 |
| ENSP00000314837 | ENSP00000381891 |
| ENSP00000314837 | ENSP00000401508 |
| ENSP00000314837 | ENSP00000408910 |
| ENSP00000314879 | ENSP00000326534 |
| ENSP00000314879 | ENSP00000369858 |
| ENSP00000314901 | ENSP00000362717 |
| ENSP00000314949 | ENSP00000315791 |
| ENSP00000314949 | ENSP00000317636 |
| ENSP00000314949 | ENSP00000318604 |
| ENSP00000314949 | ENSP00000318641 |
| ENSP00000314949 | ENSP00000319104 |
| ENSP00000314949 | ENSP00000321636 |
| ENSP00000314949 | ENSP00000322570 |
| ENSP00000314949 | ENSP00000323720 |
| ENSP00000314949 | ENSP00000324122 |
| ENSP00000314949 | ENSP00000324124 |
| ENSP00000314949 | ENSP00000325677 |

|                 |                 |
|-----------------|-----------------|
| ENSP00000314949 | ENSP00000326767 |
| ENSP00000314949 | ENSP00000326806 |
| ENSP00000314949 | ENSP00000327889 |
| ENSP00000314949 | ENSP00000328998 |
| ENSP00000314949 | ENSP00000329466 |
| ENSP00000314949 | ENSP00000329933 |
| ENSP00000314949 | ENSP00000334564 |
| ENSP00000314949 | ENSP00000337088 |
| ENSP00000314949 | ENSP00000337340 |
| ENSP00000314949 | ENSP00000337405 |
| ENSP00000314949 | ENSP00000338413 |
| ENSP00000314949 | ENSP00000339353 |
| ENSP00000314949 | ENSP00000340796 |
| ENSP00000314949 | ENSP00000340823 |
| ENSP00000314949 | ENSP00000340896 |
| ENSP00000314949 | ENSP00000341885 |
| ENSP00000314949 | ENSP00000342793 |
| ENSP00000314949 | ENSP00000342889 |
| ENSP00000314949 | ENSP00000345096 |
| ENSP00000314949 | ENSP00000345530 |
| ENSP00000314949 | ENSP00000345702 |
| ENSP00000314949 | ENSP00000346015 |
| ENSP00000314949 | ENSP00000346453 |
| ENSP00000314949 | ENSP00000346762 |
| ENSP00000314949 | ENSP00000346986 |
| ENSP00000314949 | ENSP00000347294 |
| ENSP00000314949 | ENSP00000347345 |
| ENSP00000314949 | ENSP00000347733 |
| ENSP00000314949 | ENSP00000347978 |
| ENSP00000314949 | ENSP00000348010 |
| ENSP00000314949 | ENSP00000348089 |
| ENSP00000314949 | ENSP00000348168 |
| ENSP00000314949 | ENSP00000350283 |
| ENSP00000314949 | ENSP00000350708 |
| ENSP00000314949 | ENSP00000350967 |
| ENSP00000314949 | ENSP00000351015 |
| ENSP00000314949 | ENSP00000351137 |
| ENSP00000314949 | ENSP00000351284 |
| ENSP00000314949 | ENSP00000351575 |
| ENSP00000314949 | ENSP00000351697 |
| ENSP00000314949 | ENSP00000351885 |
| ENSP00000314949 | ENSP00000354633 |
| ENSP00000314949 | ENSP00000354720 |
| ENSP00000314949 | ENSP00000354916 |
| ENSP00000314949 | ENSP00000354951 |
| ENSP00000314949 | ENSP00000355013 |

|                 |                 |
|-----------------|-----------------|
| ENSP00000314949 | ENSP00000355601 |
| ENSP00000314949 | ENSP00000355759 |
| ENSP00000314949 | ENSP00000356146 |
| ENSP00000314949 | ENSP00000356405 |
| ENSP00000314949 | ENSP00000356470 |
| ENSP00000314949 | ENSP00000356520 |
| ENSP00000314949 | ENSP00000356807 |
| ENSP00000314949 | ENSP00000357602 |
| ENSP00000314949 | ENSP00000357882 |
| ENSP00000314949 | ENSP00000358497 |
| ENSP00000314949 | ENSP00000358563 |
| ENSP00000314949 | ENSP00000358812 |
| ENSP00000314949 | ENSP00000359290 |
| ENSP00000314949 | ENSP00000359531 |
| ENSP00000314949 | ENSP00000359688 |
| ENSP00000314949 | ENSP00000359818 |
| ENSP00000314949 | ENSP00000360116 |
| ENSP00000314949 | ENSP00000360183 |
| ENSP00000314949 | ENSP00000360676 |
| ENSP00000314949 | ENSP00000361465 |
| ENSP00000314949 | ENSP00000361486 |
| ENSP00000314949 | ENSP00000361982 |
| ENSP00000314949 | ENSP00000362334 |
| ENSP00000314949 | ENSP00000362532 |
| ENSP00000314949 | ENSP00000362900 |
| ENSP00000314949 | ENSP00000363779 |
| ENSP00000314949 | ENSP00000363787 |
| ENSP00000314949 | ENSP00000364270 |
| ENSP00000314949 | ENSP00000364289 |
| ENSP00000314949 | ENSP00000365747 |
| ENSP00000314949 | ENSP00000366135 |
| ENSP00000314949 | ENSP00000366271 |
| ENSP00000314949 | ENSP00000366557 |
| ENSP00000314949 | ENSP00000366828 |
| ENSP00000314949 | ENSP00000366974 |
| ENSP00000314949 | ENSP00000368349 |
| ENSP00000314949 | ENSP00000368438 |
| ENSP00000314949 | ENSP00000368927 |
| ENSP00000314949 | ENSP00000370105 |
| ENSP00000314949 | ENSP00000370119 |
| ENSP00000314949 | ENSP00000370125 |
| ENSP00000314949 | ENSP00000370589 |
| ENSP00000314949 | ENSP00000372335 |
| ENSP00000314949 | ENSP00000372699 |
| ENSP00000314949 | ENSP00000373060 |
| ENSP00000314949 | ENSP00000373404 |



|                 |                 |
|-----------------|-----------------|
| ENSP00000314949 | ENSP00000374213 |
| ENSP00000314949 | ENSP00000374280 |
| ENSP00000314949 | ENSP00000374529 |
| ENSP00000314949 | ENSP00000375809 |
| ENSP00000314949 | ENSP00000376097 |
| ENSP00000314949 | ENSP00000377969 |
| ENSP00000314949 | ENSP00000378736 |
| ENSP00000314949 | ENSP00000379372 |
| ENSP00000314949 | ENSP00000380460 |
| ENSP00000314949 | ENSP00000381031 |
| ENSP00000314949 | ENSP00000381064 |
| ENSP00000314949 | ENSP00000385722 |
| ENSP00000314949 | ENSP00000386161 |
| ENSP00000314949 | ENSP00000386759 |
| ENSP00000314949 | ENSP00000389103 |
| ENSP00000314949 | ENSP00000392859 |
| ENSP00000314949 | ENSP00000395574 |
| ENSP00000314949 | ENSP00000396271 |
| ENSP00000314949 | ENSP00000396439 |
| ENSP00000314949 | ENSP00000400572 |
| ENSP00000314949 | ENSP00000403852 |
| ENSP00000314949 | ENSP00000404658 |
| ENSP00000314949 | ENSP00000412190 |
| ENSP00000314949 | ENSP00000417980 |
| ENSP00000314971 | ENSP00000327072 |
| ENSP00000314971 | ENSP00000332488 |
| ENSP00000314971 | ENSP00000355899 |
| ENSP00000314971 | ENSP00000361465 |
| ENSP00000314971 | ENSP00000363021 |
| ENSP00000314971 | ENSP00000367029 |
| ENSP00000314971 | ENSP00000369075 |
| ENSP00000314971 | ENSP00000370968 |
| ENSP00000314976 | ENSP00000328133 |
| ENSP00000314976 | ENSP00000343000 |
| ENSP00000315017 | ENSP00000333401 |
| ENSP00000315017 | ENSP00000360286 |
| ENSP00000315017 | ENSP00000360498 |
| ENSP00000315017 | ENSP00000370930 |
| ENSP00000315017 | ENSP00000372093 |
| ENSP00000315017 | ENSP00000377486 |
| ENSP00000315017 | ENSP00000417602 |
| ENSP00000315035 | ENSP00000319341 |
| ENSP00000315035 | ENSP00000324122 |
| ENSP00000315035 | ENSP00000332013 |
| ENSP00000315035 | ENSP00000332103 |
| ENSP00000315035 | ENSP00000335321 |

|                 |                 |
|-----------------|-----------------|
| ENSP00000315035 | ENSP00000342374 |
| ENSP00000315035 | ENSP00000361577 |
| ENSP00000315035 | ENSP00000362110 |
| ENSP00000315035 | ENSP00000364813 |
| ENSP00000315035 | ENSP00000372883 |
| ENSP00000315035 | ENSP00000400591 |
| ENSP00000315035 | ENSP00000403345 |
| ENSP00000315035 | ENSP00000406280 |
| ENSP00000315035 | ENSP00000410758 |
| ENSP00000315035 | ENSP00000412566 |
| ENSP00000315035 | ENSP00000414006 |
| ENSP00000315035 | ENSP00000414634 |
| ENSP00000315112 | ENSP00000348632 |
| ENSP00000315112 | ENSP00000363571 |
| ENSP00000315112 | ENSP00000368253 |
| ENSP00000315112 | ENSP00000381698 |
| ENSP00000315112 | ENSP00000419371 |
| ENSP00000315182 | ENSP00000332198 |
| ENSP00000315182 | ENSP00000339845 |
| ENSP00000315182 | ENSP00000343745 |
| ENSP00000315182 | ENSP00000358563 |
| ENSP00000315182 | ENSP00000364320 |
| ENSP00000315351 | ENSP00000318115 |
| ENSP00000315351 | ENSP00000323439 |
| ENSP00000315351 | ENSP00000340019 |
| ENSP00000315351 | ENSP00000341243 |
| ENSP00000315379 | ENSP00000315859 |
| ENSP00000315379 | ENSP00000318861 |
| ENSP00000315379 | ENSP00000319341 |
| ENSP00000315379 | ENSP00000324122 |
| ENSP00000315379 | ENSP00000324274 |
| ENSP00000315379 | ENSP00000326261 |
| ENSP00000315379 | ENSP00000332013 |
| ENSP00000315379 | ENSP00000332103 |
| ENSP00000315379 | ENSP00000335321 |
| ENSP00000315379 | ENSP00000342374 |
| ENSP00000315379 | ENSP00000351644 |
| ENSP00000315379 | ENSP00000355013 |
| ENSP00000315379 | ENSP00000355050 |
| ENSP00000315379 | ENSP00000358605 |
| ENSP00000315379 | ENSP00000359454 |
| ENSP00000315379 | ENSP00000360329 |
| ENSP00000315379 | ENSP00000360464 |
| ENSP00000315379 | ENSP00000360488 |
| ENSP00000315379 | ENSP00000360532 |
| ENSP00000315379 | ENSP00000361577 |

|                 |                 |
|-----------------|-----------------|
| ENSP00000315379 | ENSP00000362110 |
| ENSP00000315379 | ENSP00000363162 |
| ENSP00000315379 | ENSP00000363313 |
| ENSP00000315379 | ENSP00000364813 |
| ENSP00000315379 | ENSP00000368801 |
| ENSP00000315379 | ENSP00000370589 |
| ENSP00000315379 | ENSP00000372883 |
| ENSP00000315379 | ENSP00000400591 |
| ENSP00000315379 | ENSP00000403345 |
| ENSP00000315379 | ENSP00000406280 |
| ENSP00000315379 | ENSP00000410758 |
| ENSP00000315379 | ENSP00000412566 |
| ENSP00000315379 | ENSP00000414006 |
| ENSP00000315379 | ENSP00000414634 |
| ENSP00000315397 | ENSP00000374443 |
| ENSP00000315568 | ENSP00000345702 |
| ENSP00000315568 | ENSP00000350199 |
| ENSP00000315615 | ENSP00000345731 |
| ENSP00000315615 | ENSP00000347942 |
| ENSP00000315644 | ENSP00000317310 |
| ENSP00000315644 | ENSP00000319170 |
| ENSP00000315644 | ENSP00000344741 |
| ENSP00000315644 | ENSP00000348163 |
| ENSP00000315644 | ENSP00000368438 |
| ENSP00000315644 | ENSP00000369038 |
| ENSP00000315644 | ENSP00000371888 |
| ENSP00000315644 | ENSP00000374280 |
| ENSP00000315644 | ENSP00000381657 |
| ENSP00000315644 | ENSP00000399511 |
| ENSP00000315659 | ENSP00000316543 |
| ENSP00000315659 | ENSP00000320924 |
| ENSP00000315659 | ENSP00000348215 |
| ENSP00000315659 | ENSP00000348349 |
| ENSP00000315659 | ENSP00000351333 |
| ENSP00000315659 | ENSP00000352425 |
| ENSP00000315659 | ENSP00000354251 |
| ENSP00000315659 | ENSP00000355809 |
| ENSP00000315659 | ENSP00000356694 |
| ENSP00000315659 | ENSP00000359939 |
| ENSP00000315659 | ENSP00000365401 |
| ENSP00000315659 | ENSP00000380450 |
| ENSP00000315659 | ENSP00000386878 |
| ENSP00000315659 | ENSP00000390948 |
| ENSP00000315659 | ENSP00000402084 |
| ENSP00000315674 | ENSP00000317376 |
| ENSP00000315674 | ENSP00000320917 |

|                 |                 |
|-----------------|-----------------|
| ENSP00000315674 | ENSP00000324122 |
| ENSP00000315674 | ENSP00000326806 |
| ENSP00000315674 | ENSP00000326981 |
| ENSP00000315674 | ENSP00000327179 |
| ENSP00000315674 | ENSP00000328854 |
| ENSP00000315674 | ENSP00000329466 |
| ENSP00000315674 | ENSP00000331907 |
| ENSP00000315674 | ENSP00000338703 |
| ENSP00000315674 | ENSP00000339095 |
| ENSP00000315674 | ENSP00000355541 |
| ENSP00000315674 | ENSP00000356520 |
| ENSP00000315674 | ENSP00000358019 |
| ENSP00000315674 | ENSP00000358242 |
| ENSP00000315674 | ENSP00000358812 |
| ENSP00000315674 | ENSP00000360031 |
| ENSP00000315674 | ENSP00000362744 |
| ENSP00000315674 | ENSP00000363642 |
| ENSP00000315674 | ENSP00000363746 |
| ENSP00000315674 | ENSP00000366557 |
| ENSP00000315674 | ENSP00000366607 |
| ENSP00000315674 | ENSP00000370589 |
| ENSP00000315674 | ENSP00000371101 |
| ENSP00000315674 | ENSP00000371169 |
| ENSP00000315674 | ENSP00000372695 |
| ENSP00000315674 | ENSP00000377944 |
| ENSP00000315674 | ENSP00000379888 |
| ENSP00000315674 | ENSP00000384302 |
| ENSP00000315674 | ENSP00000387303 |
| ENSP00000315674 | ENSP00000392601 |
| ENSP00000315674 | ENSP00000399454 |
| ENSP00000315674 | ENSP00000402869 |
| ENSP00000315674 | ENSP00000405614 |
| ENSP00000315674 | ENSP00000414321 |
| ENSP00000315693 | ENSP00000318115 |
| ENSP00000315693 | ENSP00000318351 |
| ENSP00000315693 | ENSP00000320566 |
| ENSP00000315693 | ENSP00000325677 |
| ENSP00000315693 | ENSP00000327436 |
| ENSP00000315693 | ENSP00000331479 |
| ENSP00000315693 | ENSP00000352219 |
| ENSP00000315693 | ENSP00000353622 |
| ENSP00000315693 | ENSP00000356405 |
| ENSP00000315693 | ENSP00000356587 |
| ENSP00000315693 | ENSP00000357360 |
| ENSP00000315693 | ENSP00000358695 |
| ENSP00000315693 | ENSP00000360782 |

|                 |                 |
|-----------------|-----------------|
| ENSP00000315693 | ENSP00000361005 |
| ENSP00000315693 | ENSP00000367079 |
| ENSP00000315693 | ENSP00000368066 |
| ENSP00000315693 | ENSP00000368140 |
| ENSP00000315693 | ENSP00000369519 |
| ENSP00000315693 | ENSP00000370517 |
| ENSP00000315693 | ENSP00000392896 |
| ENSP00000315693 | ENSP00000394382 |
| ENSP00000315700 | ENSP00000318977 |
| ENSP00000315700 | ENSP00000322180 |
| ENSP00000315700 | ENSP00000325863 |
| ENSP00000315700 | ENSP00000336927 |
| ENSP00000315700 | ENSP00000339145 |
| ENSP00000315700 | ENSP00000342434 |
| ENSP00000315700 | ENSP00000344741 |
| ENSP00000315700 | ENSP00000351284 |
| ENSP00000315700 | ENSP00000351697 |
| ENSP00000315700 | ENSP00000352257 |
| ENSP00000315700 | ENSP00000353793 |
| ENSP00000315700 | ENSP00000354720 |
| ENSP00000315700 | ENSP00000357965 |
| ENSP00000315700 | ENSP00000358478 |
| ENSP00000315700 | ENSP00000360116 |
| ENSP00000315700 | ENSP00000362592 |
| ENSP00000315700 | ENSP00000364270 |
| ENSP00000315700 | ENSP00000366974 |
| ENSP00000315700 | ENSP00000368438 |
| ENSP00000315700 | ENSP00000371475 |
| ENSP00000315700 | ENSP00000372023 |
| ENSP00000315700 | ENSP00000379607 |
| ENSP00000315700 | ENSP00000420714 |
| ENSP00000315702 | ENSP00000317334 |
| ENSP00000315702 | ENSP00000350071 |
| ENSP00000315702 | ENSP00000352676 |
| ENSP00000315702 | ENSP00000355026 |
| ENSP00000315702 | ENSP00000358778 |
| ENSP00000315702 | ENSP00000358810 |
| ENSP00000315702 | ENSP00000360798 |
| ENSP00000315702 | ENSP00000382595 |
| ENSP00000315702 | ENSP00000385006 |
| ENSP00000315768 | ENSP00000320768 |
| ENSP00000315768 | ENSP00000323720 |
| ENSP00000315768 | ENSP00000323967 |
| ENSP00000315768 | ENSP00000343957 |
| ENSP00000315768 | ENSP00000369647 |
| ENSP00000315768 | ENSP00000381567 |

|                 |                 |
|-----------------|-----------------|
| ENSP00000315774 | ENSP00000322450 |
| ENSP00000315774 | ENSP00000327268 |
| ENSP00000315774 | ENSP00000356972 |
| ENSP00000315774 | ENSP00000360992 |
| ENSP00000315774 | ENSP00000385610 |
| ENSP00000315791 | ENSP00000317087 |
| ENSP00000315791 | ENSP00000317872 |
| ENSP00000315791 | ENSP00000318195 |
| ENSP00000315791 | ENSP00000325377 |
| ENSP00000315791 | ENSP00000329029 |
| ENSP00000315791 | ENSP00000331879 |
| ENSP00000315791 | ENSP00000336752 |
| ENSP00000315791 | ENSP00000337405 |
| ENSP00000315791 | ENSP00000339115 |
| ENSP00000315791 | ENSP00000339245 |
| ENSP00000315791 | ENSP00000339353 |
| ENSP00000315791 | ENSP00000344537 |
| ENSP00000315791 | ENSP00000345156 |
| ENSP00000315791 | ENSP00000352514 |
| ENSP00000315791 | ENSP00000353698 |
| ENSP00000315791 | ENSP00000354995 |
| ENSP00000315791 | ENSP00000355185 |
| ENSP00000315791 | ENSP00000356405 |
| ENSP00000315791 | ENSP00000358413 |
| ENSP00000315791 | ENSP00000358576 |
| ENSP00000315791 | ENSP00000359531 |
| ENSP00000315791 | ENSP00000360532 |
| ENSP00000315791 | ENSP00000361949 |
| ENSP00000315791 | ENSP00000362900 |
| ENSP00000315791 | ENSP00000363734 |
| ENSP00000315791 | ENSP00000366135 |
| ENSP00000315791 | ENSP00000366974 |
| ENSP00000315791 | ENSP00000367059 |
| ENSP00000315791 | ENSP00000367527 |
| ENSP00000315791 | ENSP00000368686 |
| ENSP00000315791 | ENSP00000372694 |
| ENSP00000315791 | ENSP00000374213 |
| ENSP00000315791 | ENSP00000375809 |
| ENSP00000315791 | ENSP00000398208 |
| ENSP00000315791 | ENSP00000398597 |
| ENSP00000315791 | ENSP00000403397 |
| ENSP00000315791 | ENSP00000412319 |
| ENSP00000315791 | ENSP00000415678 |
| ENSP00000315859 | ENSP00000316879 |
| ENSP00000315859 | ENSP00000318195 |
| ENSP00000315859 | ENSP00000318318 |

|                 |                 |
|-----------------|-----------------|
| ENSP00000315859 | ENSP00000318861 |
| ENSP00000315859 | ENSP00000321503 |
| ENSP00000315859 | ENSP00000321711 |
| ENSP00000315859 | ENSP00000323527 |
| ENSP00000315859 | ENSP00000324827 |
| ENSP00000315859 | ENSP00000325377 |
| ENSP00000315859 | ENSP00000326261 |
| ENSP00000315859 | ENSP00000328690 |
| ENSP00000315859 | ENSP00000331817 |
| ENSP00000315859 | ENSP00000332444 |
| ENSP00000315859 | ENSP00000334538 |
| ENSP00000315859 | ENSP00000335321 |
| ENSP00000315859 | ENSP00000336752 |
| ENSP00000315859 | ENSP00000337194 |
| ENSP00000315859 | ENSP00000337340 |
| ENSP00000315859 | ENSP00000339030 |
| ENSP00000315859 | ENSP00000340281 |
| ENSP00000315859 | ENSP00000343535 |
| ENSP00000315859 | ENSP00000346335 |
| ENSP00000315859 | ENSP00000348708 |
| ENSP00000315859 | ENSP00000351221 |
| ENSP00000315859 | ENSP00000351926 |
| ENSP00000315859 | ENSP00000354486 |
| ENSP00000315859 | ENSP00000356405 |
| ENSP00000315859 | ENSP00000358812 |
| ENSP00000315859 | ENSP00000359988 |
| ENSP00000315859 | ENSP00000360464 |
| ENSP00000315859 | ENSP00000361949 |
| ENSP00000315859 | ENSP00000362820 |
| ENSP00000315859 | ENSP00000362900 |
| ENSP00000315859 | ENSP00000363313 |
| ENSP00000315859 | ENSP00000366135 |
| ENSP00000315859 | ENSP00000367406 |
| ENSP00000315859 | ENSP00000368017 |
| ENSP00000315859 | ENSP00000368824 |
| ENSP00000315859 | ENSP00000370119 |
| ENSP00000315859 | ENSP00000377262 |
| ENSP00000315859 | ENSP00000379607 |
| ENSP00000315859 | ENSP00000391774 |
| ENSP00000315859 | ENSP00000416959 |
| ENSP00000315925 | ENSP00000330343 |
| ENSP00000315925 | ENSP00000330408 |
| ENSP00000315925 | ENSP00000360644 |
| ENSP00000315925 | ENSP00000363373 |
| ENSP00000315925 | ENSP00000373509 |
| ENSP00000315925 | ENSP00000382595 |

|                 |                 |
|-----------------|-----------------|
| ENSP00000315925 | ENSP00000417764 |
| ENSP00000315931 | ENSP00000348395 |
| ENSP00000315931 | ENSP00000355923 |
| ENSP00000315931 | ENSP00000359976 |
| ENSP00000315931 | ENSP00000361603 |
| ENSP00000315931 | ENSP00000379933 |
| ENSP00000315931 | ENSP00000417132 |
| ENSP00000315949 | ENSP00000326296 |
| ENSP00000315950 | ENSP00000324124 |
| ENSP00000315950 | ENSP00000344572 |
| ENSP00000315950 | ENSP00000403852 |
| ENSP00000316032 | ENSP00000318195 |
| ENSP00000316032 | ENSP00000325376 |
| ENSP00000316032 | ENSP00000326806 |
| ENSP00000316032 | ENSP00000329466 |
| ENSP00000316032 | ENSP00000336712 |
| ENSP00000316032 | ENSP00000343535 |
| ENSP00000316032 | ENSP00000343701 |
| ENSP00000316032 | ENSP00000344456 |
| ENSP00000316032 | ENSP00000344460 |
| ENSP00000316032 | ENSP00000344936 |
| ENSP00000316032 | ENSP00000346453 |
| ENSP00000316032 | ENSP00000347087 |
| ENSP00000316032 | ENSP00000348577 |
| ENSP00000316032 | ENSP00000349213 |
| ENSP00000316032 | ENSP00000352021 |
| ENSP00000316032 | ENSP00000352400 |
| ENSP00000316032 | ENSP00000354673 |
| ENSP00000316032 | ENSP00000355013 |
| ENSP00000316032 | ENSP00000356448 |
| ENSP00000316032 | ENSP00000356744 |
| ENSP00000316032 | ENSP00000357283 |
| ENSP00000316032 | ENSP00000357547 |
| ENSP00000316032 | ENSP00000358400 |
| ENSP00000316032 | ENSP00000358417 |
| ENSP00000316032 | ENSP00000360031 |
| ENSP00000316032 | ENSP00000360286 |
| ENSP00000316032 | ENSP00000361180 |
| ENSP00000316032 | ENSP00000361418 |
| ENSP00000316032 | ENSP00000366135 |
| ENSP00000316032 | ENSP00000368856 |
| ENSP00000316032 | ENSP00000368959 |
| ENSP00000316032 | ENSP00000369042 |
| ENSP00000316032 | ENSP00000375863 |
| ENSP00000316032 | ENSP00000378529 |
| ENSP00000316032 | ENSP00000382779 |



|                 |                 |
|-----------------|-----------------|
| ENSP00000316032 | ENSP00000386992 |
| ENSP00000316032 | ENSP00000397441 |
| ENSP00000316032 | ENSP00000403536 |
| ENSP00000316109 | ENSP00000360286 |
| ENSP00000316109 | ENSP00000361162 |
| ENSP00000316109 | ENSP00000373474 |
| ENSP00000316114 | ENSP00000324444 |
| ENSP00000316114 | ENSP00000344537 |
| ENSP00000316114 | ENSP00000345702 |
| ENSP00000316114 | ENSP00000347733 |
| ENSP00000316114 | ENSP00000358854 |
| ENSP00000316114 | ENSP00000359290 |
| ENSP00000316114 | ENSP00000359837 |
| ENSP00000316114 | ENSP00000360515 |
| ENSP00000316114 | ENSP00000369695 |
| ENSP00000316114 | ENSP00000373566 |
| ENSP00000316114 | ENSP00000377747 |
| ENSP00000316114 | ENSP00000396620 |
| ENSP00000316114 | ENSP00000396749 |
| ENSP00000316114 | ENSP00000397259 |
| ENSP00000316121 | ENSP00000350447 |
| ENSP00000316121 | ENSP00000364582 |
| ENSP00000316121 | ENSP00000378295 |
| ENSP00000316152 | ENSP00000345530 |
| ENSP00000316152 | ENSP00000365747 |
| ENSP00000316240 | ENSP00000335321 |
| ENSP00000316240 | ENSP00000351137 |
| ENSP00000316240 | ENSP00000357998 |
| ENSP00000316240 | ENSP00000362110 |
| ENSP00000316240 | ENSP00000368565 |
| ENSP00000316240 | ENSP00000374443 |
| ENSP00000316328 | ENSP00000344537 |
| ENSP00000316328 | ENSP00000374359 |
| ENSP00000316333 | ENSP00000380460 |
| ENSP00000316454 | ENSP00000349437 |
| ENSP00000316454 | ENSP00000355812 |
| ENSP00000316454 | ENSP00000377148 |
| ENSP00000316460 | ENSP00000338171 |
| ENSP00000316460 | ENSP00000339186 |
| ENSP00000316460 | ENSP00000346566 |
| ENSP00000316460 | ENSP00000355809 |
| ENSP00000316460 | ENSP00000356694 |
| ENSP00000316460 | ENSP00000358335 |
| ENSP00000316460 | ENSP00000365891 |
| ENSP00000316460 | ENSP00000373509 |
| ENSP00000316460 | ENSP00000380150 |

|                 |                 |
|-----------------|-----------------|
| ENSP00000316460 | ENSP00000381698 |
| ENSP00000316476 | ENSP00000333667 |
| ENSP00000316476 | ENSP00000361057 |
| ENSP00000316476 | ENSP00000371559 |
| ENSP00000316476 | ENSP00000382492 |
| ENSP00000316543 | ENSP00000355809 |
| ENSP00000316543 | ENSP00000380921 |
| ENSP00000316578 | ENSP00000332995 |
| ENSP00000316578 | ENSP00000341280 |
| ENSP00000316578 | ENSP00000343535 |
| ENSP00000316578 | ENSP00000347184 |
| ENSP00000316578 | ENSP00000352516 |
| ENSP00000316578 | ENSP00000357907 |
| ENSP00000316578 | ENSP00000357965 |
| ENSP00000316578 | ENSP00000359321 |
| ENSP00000316578 | ENSP00000362352 |
| ENSP00000316578 | ENSP00000362592 |
| ENSP00000316578 | ENSP00000380718 |
| ENSP00000316578 | ENSP00000381031 |
| ENSP00000316578 | ENSP00000381840 |
| ENSP00000316578 | ENSP00000382688 |
| ENSP00000316578 | ENSP00000404658 |
| ENSP00000316681 | ENSP00000326514 |
| ENSP00000316842 | ENSP00000347294 |
| ENSP00000316845 | ENSP00000319169 |
| ENSP00000316845 | ENSP00000322957 |
| ENSP00000316845 | ENSP00000338967 |
| ENSP00000316845 | ENSP00000348215 |
| ENSP00000316845 | ENSP00000348349 |
| ENSP00000316845 | ENSP00000349213 |
| ENSP00000316845 | ENSP00000351333 |
| ENSP00000316845 | ENSP00000354558 |
| ENSP00000316845 | ENSP00000359939 |
| ENSP00000316845 | ENSP00000366121 |
| ENSP00000316845 | ENSP00000374280 |
| ENSP00000316845 | ENSP00000380450 |
| ENSP00000316845 | ENSP00000402084 |
| ENSP00000316854 | ENSP00000345728 |
| ENSP00000316879 | ENSP00000317872 |
| ENSP00000316879 | ENSP00000318646 |
| ENSP00000316879 | ENSP00000322570 |
| ENSP00000316879 | ENSP00000323858 |
| ENSP00000316879 | ENSP00000325376 |
| ENSP00000316879 | ENSP00000326806 |
| ENSP00000316879 | ENSP00000329466 |
| ENSP00000316879 | ENSP00000329715 |

|                 |                 |
|-----------------|-----------------|
| ENSP00000316879 | ENSP00000331817 |
| ENSP00000316879 | ENSP00000338862 |
| ENSP00000316879 | ENSP00000341885 |
| ENSP00000316879 | ENSP00000342300 |
| ENSP00000316879 | ENSP00000343081 |
| ENSP00000316879 | ENSP00000345793 |
| ENSP00000316879 | ENSP00000346453 |
| ENSP00000316879 | ENSP00000348708 |
| ENSP00000316879 | ENSP00000348722 |
| ENSP00000316879 | ENSP00000351697 |
| ENSP00000316879 | ENSP00000354125 |
| ENSP00000316879 | ENSP00000354522 |
| ENSP00000316879 | ENSP00000355890 |
| ENSP00000316879 | ENSP00000356146 |
| ENSP00000316879 | ENSP00000358140 |
| ENSP00000316879 | ENSP00000358563 |
| ENSP00000316879 | ENSP00000358812 |
| ENSP00000316879 | ENSP00000359688 |
| ENSP00000316879 | ENSP00000361014 |
| ENSP00000316879 | ENSP00000361982 |
| ENSP00000316879 | ENSP00000362688 |
| ENSP00000316879 | ENSP00000362900 |
| ENSP00000316879 | ENSP00000362936 |
| ENSP00000316879 | ENSP00000364119 |
| ENSP00000316879 | ENSP00000364289 |
| ENSP00000316879 | ENSP00000366607 |
| ENSP00000316879 | ENSP00000366974 |
| ENSP00000316879 | ENSP00000368226 |
| ENSP00000316879 | ENSP00000368349 |
| ENSP00000316879 | ENSP00000368565 |
| ENSP00000316879 | ENSP00000371546 |
| ENSP00000316879 | ENSP00000373715 |
| ENSP00000316879 | ENSP00000374213 |
| ENSP00000316879 | ENSP00000379607 |
| ENSP00000316879 | ENSP00000381045 |
| ENSP00000316879 | ENSP00000386717 |
| ENSP00000316879 | ENSP00000401371 |
| ENSP00000316879 | ENSP00000402338 |
| ENSP00000316879 | ENSP00000412553 |
| ENSP00000316879 | ENSP00000417229 |
| ENSP00000316990 | ENSP00000352708 |
| ENSP00000316990 | ENSP00000359000 |
| ENSP00000316990 | ENSP00000360183 |
| ENSP00000316990 | ENSP00000373979 |
| ENSP00000316990 | ENSP00000397441 |
| ENSP00000316990 | ENSP00000402240 |

|                 |                 |
|-----------------|-----------------|
| ENSP00000317039 | ENSP00000318977 |
| ENSP00000317039 | ENSP00000321636 |
| ENSP00000317039 | ENSP00000322242 |
| ENSP00000317039 | ENSP00000328940 |
| ENSP00000317039 | ENSP00000330875 |
| ENSP00000317039 | ENSP00000331879 |
| ENSP00000317039 | ENSP00000334675 |
| ENSP00000317039 | ENSP00000336606 |
| ENSP00000317039 | ENSP00000347232 |
| ENSP00000317039 | ENSP00000351284 |
| ENSP00000317039 | ENSP00000353793 |
| ENSP00000317039 | ENSP00000354522 |
| ENSP00000317039 | ENSP00000363021 |
| ENSP00000317039 | ENSP00000366843 |
| ENSP00000317039 | ENSP00000369335 |
| ENSP00000317039 | ENSP00000370151 |
| ENSP00000317039 | ENSP00000372023 |
| ENSP00000317039 | ENSP00000373952 |
| ENSP00000317087 | ENSP00000320885 |
| ENSP00000317087 | ENSP00000322242 |
| ENSP00000317087 | ENSP00000331487 |
| ENSP00000317087 | ENSP00000332049 |
| ENSP00000317087 | ENSP00000333836 |
| ENSP00000317087 | ENSP00000348010 |
| ENSP00000317087 | ENSP00000357998 |
| ENSP00000317087 | ENSP00000366395 |
| ENSP00000317087 | ENSP00000379457 |
| ENSP00000317087 | ENSP00000383719 |
| ENSP00000317087 | ENSP00000387347 |
| ENSP00000317121 | ENSP00000350874 |
| ENSP00000317145 | ENSP00000347942 |
| ENSP00000317145 | ENSP00000393725 |
| ENSP00000317156 | ENSP00000336842 |
| ENSP00000317156 | ENSP00000348163 |
| ENSP00000317156 | ENSP00000357887 |
| ENSP00000317156 | ENSP00000369816 |
| ENSP00000317156 | ENSP00000408910 |
| ENSP00000317159 | ENSP00000317780 |
| ENSP00000317159 | ENSP00000326579 |
| ENSP00000317159 | ENSP00000327070 |
| ENSP00000317159 | ENSP00000332887 |
| ENSP00000317159 | ENSP00000336524 |
| ENSP00000317159 | ENSP00000336927 |
| ENSP00000317159 | ENSP00000341838 |
| ENSP00000317159 | ENSP00000353073 |
| ENSP00000317159 | ENSP00000354499 |

|                 |                 |
|-----------------|-----------------|
| ENSP00000317159 | ENSP00000354554 |
| ENSP00000317159 | ENSP00000354876 |
| ENSP00000317159 | ENSP00000354982 |
| ENSP00000317159 | ENSP00000355572 |
| ENSP00000317159 | ENSP00000356953 |
| ENSP00000317159 | ENSP00000358695 |
| ENSP00000317159 | ENSP00000361042 |
| ENSP00000317159 | ENSP00000363533 |
| ENSP00000317159 | ENSP00000364699 |
| ENSP00000317159 | ENSP00000365243 |
| ENSP00000317159 | ENSP00000367934 |
| ENSP00000317159 | ENSP00000379500 |
| ENSP00000317159 | ENSP00000387262 |
| ENSP00000317159 | ENSP00000389649 |
| ENSP00000317159 | ENSP00000389934 |
| ENSP00000317177 | ENSP00000355607 |
| ENSP00000317177 | ENSP00000358497 |
| ENSP00000317177 | ENSP00000369860 |
| ENSP00000317177 | ENSP00000376268 |
| ENSP00000317177 | ENSP00000387185 |
| ENSP00000317232 | ENSP00000317992 |
| ENSP00000317232 | ENSP00000322396 |
| ENSP00000317232 | ENSP00000328940 |
| ENSP00000317232 | ENSP00000338862 |
| ENSP00000317232 | ENSP00000354040 |
| ENSP00000317232 | ENSP00000359345 |
| ENSP00000317232 | ENSP00000359688 |
| ENSP00000317232 | ENSP00000360412 |
| ENSP00000317232 | ENSP00000363384 |
| ENSP00000317232 | ENSP00000380982 |
| ENSP00000317232 | ENSP00000381657 |
| ENSP00000317232 | ENSP00000402338 |
| ENSP00000317271 | ENSP00000353393 |
| ENSP00000317310 | ENSP00000353362 |
| ENSP00000317327 | ENSP00000355865 |
| ENSP00000317327 | ENSP00000373700 |
| ENSP00000317331 | ENSP00000332887 |
| ENSP00000317331 | ENSP00000340698 |
| ENSP00000317331 | ENSP00000341213 |
| ENSP00000317331 | ENSP00000348915 |
| ENSP00000317331 | ENSP00000349142 |
| ENSP00000317331 | ENSP00000361057 |
| ENSP00000317331 | ENSP00000364188 |
| ENSP00000317331 | ENSP00000379228 |
| ENSP00000317332 | ENSP00000356694 |
| ENSP00000317332 | ENSP00000384675 |

|                 |                 |
|-----------------|-----------------|
| ENSP00000317333 | ENSP00000331057 |
| ENSP00000317333 | ENSP00000367972 |
| ENSP00000317334 | ENSP00000320309 |
| ENSP00000317334 | ENSP00000320566 |
| ENSP00000317334 | ENSP00000320648 |
| ENSP00000317334 | ENSP00000323439 |
| ENSP00000317334 | ENSP00000325448 |
| ENSP00000317334 | ENSP00000325677 |
| ENSP00000317334 | ENSP00000327070 |
| ENSP00000317334 | ENSP00000329558 |
| ENSP00000317334 | ENSP00000334188 |
| ENSP00000317334 | ENSP00000334836 |
| ENSP00000317334 | ENSP00000337475 |
| ENSP00000317334 | ENSP00000338093 |
| ENSP00000317334 | ENSP00000339933 |
| ENSP00000317334 | ENSP00000340237 |
| ENSP00000317334 | ENSP00000340879 |
| ENSP00000317334 | ENSP00000340896 |
| ENSP00000317334 | ENSP00000341382 |
| ENSP00000317334 | ENSP00000342889 |
| ENSP00000317334 | ENSP00000345892 |
| ENSP00000317334 | ENSP00000346022 |
| ENSP00000317334 | ENSP00000346566 |
| ENSP00000317334 | ENSP00000347719 |
| ENSP00000317334 | ENSP00000348163 |
| ENSP00000317334 | ENSP00000348784 |
| ENSP00000317334 | ENSP00000349016 |
| ENSP00000317334 | ENSP00000350071 |
| ENSP00000317334 | ENSP00000351885 |
| ENSP00000317334 | ENSP00000352738 |
| ENSP00000317334 | ENSP00000353098 |
| ENSP00000317334 | ENSP00000354720 |
| ENSP00000317334 | ENSP00000355890 |
| ENSP00000317334 | ENSP00000355958 |
| ENSP00000317334 | ENSP00000356405 |
| ENSP00000317334 | ENSP00000356641 |
| ENSP00000317334 | ENSP00000356989 |
| ENSP00000317334 | ENSP00000357887 |
| ENSP00000317334 | ENSP00000358140 |
| ENSP00000317334 | ENSP00000358854 |
| ENSP00000317334 | ENSP00000360286 |
| ENSP00000317334 | ENSP00000360412 |
| ENSP00000317334 | ENSP00000360473 |
| ENSP00000317334 | ENSP00000360515 |
| ENSP00000317334 | ENSP00000360532 |
| ENSP00000317334 | ENSP00000361287 |

|                 |                 |
|-----------------|-----------------|
| ENSP00000317334 | ENSP00000361465 |
| ENSP00000317334 | ENSP00000361686 |
| ENSP00000317334 | ENSP00000362532 |
| ENSP00000317334 | ENSP00000362576 |
| ENSP00000317334 | ENSP00000363676 |
| ENSP00000317334 | ENSP00000363734 |
| ENSP00000317334 | ENSP00000364320 |
| ENSP00000317334 | ENSP00000364649 |
| ENSP00000317334 | ENSP00000364699 |
| ENSP00000317334 | ENSP00000365775 |
| ENSP00000317334 | ENSP00000366620 |
| ENSP00000317334 | ENSP00000367498 |
| ENSP00000317334 | ENSP00000369162 |
| ENSP00000317334 | ENSP00000369757 |
| ENSP00000317334 | ENSP00000371888 |
| ENSP00000317334 | ENSP00000372694 |
| ENSP00000317334 | ENSP00000373952 |
| ENSP00000317334 | ENSP00000374280 |
| ENSP00000317334 | ENSP00000376946 |
| ENSP00000317334 | ENSP00000379607 |
| ENSP00000317334 | ENSP00000382595 |
| ENSP00000317334 | ENSP00000386456 |
| ENSP00000317334 | ENSP00000400591 |
| ENSP00000317334 | ENSP00000403852 |
| ENSP00000317334 | ENSP00000412319 |
| ENSP00000317334 | ENSP00000415678 |
| ENSP00000317376 | ENSP00000318646 |
| ENSP00000317376 | ENSP00000320658 |
| ENSP00000317376 | ENSP00000322419 |
| ENSP00000317376 | ENSP00000323856 |
| ENSP00000317376 | ENSP00000326981 |
| ENSP00000317376 | ENSP00000331019 |
| ENSP00000317376 | ENSP00000336702 |
| ENSP00000317376 | ENSP00000337127 |
| ENSP00000317376 | ENSP00000339095 |
| ENSP00000317376 | ENSP00000339795 |
| ENSP00000317376 | ENSP00000341885 |
| ENSP00000317376 | ENSP00000345156 |
| ENSP00000317376 | ENSP00000346015 |
| ENSP00000317376 | ENSP00000346022 |
| ENSP00000317376 | ENSP00000346027 |
| ENSP00000317376 | ENSP00000346037 |
| ENSP00000317376 | ENSP00000346050 |
| ENSP00000317376 | ENSP00000346067 |
| ENSP00000317376 | ENSP00000348965 |
| ENSP00000317376 | ENSP00000352706 |

|                 |                 |
|-----------------|-----------------|
| ENSP00000317376 | ENSP00000354525 |
| ENSP00000317376 | ENSP00000354739 |
| ENSP00000317376 | ENSP00000355471 |
| ENSP00000317376 | ENSP00000356134 |
| ENSP00000317376 | ENSP00000356811 |
| ENSP00000317376 | ENSP00000361076 |
| ENSP00000317376 | ENSP00000362036 |
| ENSP00000317376 | ENSP00000362576 |
| ENSP00000317376 | ENSP00000362688 |
| ENSP00000317376 | ENSP00000362744 |
| ENSP00000317376 | ENSP00000363018 |
| ENSP00000317376 | ENSP00000363676 |
| ENSP00000317376 | ENSP00000364320 |
| ENSP00000317376 | ENSP00000368790 |
| ENSP00000317376 | ENSP00000369757 |
| ENSP00000317376 | ENSP00000372445 |
| ENSP00000317376 | ENSP00000373404 |
| ENSP00000317376 | ENSP00000375730 |
| ENSP00000317376 | ENSP00000377640 |
| ENSP00000317376 | ENSP00000379372 |
| ENSP00000317376 | ENSP00000379888 |
| ENSP00000317376 | ENSP00000386717 |
| ENSP00000317376 | ENSP00000389103 |
| ENSP00000317376 | ENSP00000393241 |
| ENSP00000317376 | ENSP00000393393 |
| ENSP00000317376 | ENSP00000402338 |
| ENSP00000317376 | ENSP00000403175 |
| ENSP00000317376 | ENSP00000412583 |
| ENSP00000317376 | ENSP00000414321 |
| ENSP00000317376 | ENSP00000416110 |
| ENSP00000317376 | ENSP00000417763 |
| ENSP00000317431 | ENSP00000326921 |
| ENSP00000317431 | ENSP00000331201 |
| ENSP00000317431 | ENSP00000334061 |
| ENSP00000317431 | ENSP00000347498 |
| ENSP00000317431 | ENSP00000350199 |
| ENSP00000317431 | ENSP00000366121 |
| ENSP00000317431 | ENSP00000377148 |
| ENSP00000317431 | ENSP00000381577 |
| ENSP00000317468 | ENSP00000320885 |
| ENSP00000317468 | ENSP00000330320 |
| ENSP00000317468 | ENSP00000333836 |
| ENSP00000317468 | ENSP00000334061 |
| ENSP00000317468 | ENSP00000337443 |
| ENSP00000317468 | ENSP00000345216 |
| ENSP00000317468 | ENSP00000348602 |



|                 |                 |
|-----------------|-----------------|
| ENSP00000317468 | ENSP00000350874 |
| ENSP00000317468 | ENSP00000354522 |
| ENSP00000317468 | ENSP00000366565 |
| ENSP00000317468 | ENSP00000367299 |
| ENSP00000317468 | ENSP00000379500 |
| ENSP00000317468 | ENSP00000381293 |
| ENSP00000317468 | ENSP00000387347 |
| ENSP00000317636 | ENSP00000318195 |
| ENSP00000317636 | ENSP00000321636 |
| ENSP00000317636 | ENSP00000323439 |
| ENSP00000317636 | ENSP00000325863 |
| ENSP00000317636 | ENSP00000327197 |
| ENSP00000317636 | ENSP00000328940 |
| ENSP00000317636 | ENSP00000336606 |
| ENSP00000317636 | ENSP00000337353 |
| ENSP00000317636 | ENSP00000340305 |
| ENSP00000317636 | ENSP00000340879 |
| ENSP00000317636 | ENSP00000343392 |
| ENSP00000317636 | ENSP00000346566 |
| ENSP00000317636 | ENSP00000347978 |
| ENSP00000317636 | ENSP00000348020 |
| ENSP00000317636 | ENSP00000349393 |
| ENSP00000317636 | ENSP00000351284 |
| ENSP00000317636 | ENSP00000351885 |
| ENSP00000317636 | ENSP00000352257 |
| ENSP00000317636 | ENSP00000353793 |
| ENSP00000317636 | ENSP00000354522 |
| ENSP00000317636 | ENSP00000358019 |
| ENSP00000317636 | ENSP00000358478 |
| ENSP00000317636 | ENSP00000359454 |
| ENSP00000317636 | ENSP00000360310 |
| ENSP00000317636 | ENSP00000367029 |
| ENSP00000317636 | ENSP00000368438 |
| ENSP00000317636 | ENSP00000368646 |
| ENSP00000317636 | ENSP00000369335 |
| ENSP00000317636 | ENSP00000369411 |
| ENSP00000317636 | ENSP00000370150 |
| ENSP00000317636 | ENSP00000370151 |
| ENSP00000317636 | ENSP00000375809 |
| ENSP00000317636 | ENSP00000377655 |
| ENSP00000317636 | ENSP00000394649 |
| ENSP00000317636 | ENSP00000394791 |
| ENSP00000317636 | ENSP00000396704 |
| ENSP00000317636 | ENSP00000402527 |
| ENSP00000317636 | ENSP00000406868 |
| ENSP00000317636 | ENSP00000407047 |

|                 |                 |
|-----------------|-----------------|
| ENSP00000317691 | ENSP00000339529 |
| ENSP00000317691 | ENSP00000350098 |
| ENSP00000317691 | ENSP00000362314 |
| ENSP00000317691 | ENSP00000367439 |
| ENSP00000317714 | ENSP00000323377 |
| ENSP00000317714 | ENSP00000324628 |
| ENSP00000317714 | ENSP00000334100 |
| ENSP00000317714 | ENSP00000340914 |
| ENSP00000317714 | ENSP00000341848 |
| ENSP00000317714 | ENSP00000345731 |
| ENSP00000317714 | ENSP00000346437 |
| ENSP00000317714 | ENSP00000349486 |
| ENSP00000317714 | ENSP00000351206 |
| ENSP00000317714 | ENSP00000353564 |
| ENSP00000317714 | ENSP00000354486 |
| ENSP00000317714 | ENSP00000355922 |
| ENSP00000317714 | ENSP00000360183 |
| ENSP00000317714 | ENSP00000362399 |
| ENSP00000317714 | ENSP00000365530 |
| ENSP00000317714 | ENSP00000368244 |
| ENSP00000317714 | ENSP00000381293 |
| ENSP00000317714 | ENSP00000390783 |
| ENSP00000317714 | ENSP00000417748 |
| ENSP00000317721 | ENSP00000350249 |
| ENSP00000317721 | ENSP00000374280 |
| ENSP00000317780 | ENSP00000332887 |
| ENSP00000317780 | ENSP00000342300 |
| ENSP00000317780 | ENSP00000348886 |
| ENSP00000317780 | ENSP00000354499 |
| ENSP00000317780 | ENSP00000354554 |
| ENSP00000317780 | ENSP00000354876 |
| ENSP00000317780 | ENSP00000354982 |
| ENSP00000317780 | ENSP00000355572 |
| ENSP00000317780 | ENSP00000356329 |
| ENSP00000317780 | ENSP00000357980 |
| ENSP00000317780 | ENSP00000360782 |
| ENSP00000317780 | ENSP00000361042 |
| ENSP00000317780 | ENSP00000361686 |
| ENSP00000317780 | ENSP00000364699 |
| ENSP00000317780 | ENSP00000365243 |
| ENSP00000317780 | ENSP00000367934 |
| ENSP00000317780 | ENSP00000387262 |
| ENSP00000317790 | ENSP00000322170 |
| ENSP00000317790 | ENSP00000348163 |
| ENSP00000317790 | ENSP00000349208 |
| ENSP00000317790 | ENSP00000354560 |

|                 |                 |
|-----------------|-----------------|
| ENSP00000317790 | ENSP00000357547 |
| ENSP00000317790 | ENSP00000359345 |
| ENSP00000317817 | ENSP00000363763 |
| ENSP00000317817 | ENSP00000380150 |
| ENSP00000317872 | ENSP00000325377 |
| ENSP00000317872 | ENSP00000332444 |
| ENSP00000317872 | ENSP00000336752 |
| ENSP00000317872 | ENSP00000339353 |
| ENSP00000317872 | ENSP00000340281 |
| ENSP00000317872 | ENSP00000348010 |
| ENSP00000317872 | ENSP00000348069 |
| ENSP00000317872 | ENSP00000355185 |
| ENSP00000317872 | ENSP00000358576 |
| ENSP00000317872 | ENSP00000360519 |
| ENSP00000317872 | ENSP00000360916 |
| ENSP00000317872 | ENSP00000362748 |
| ENSP00000317872 | ENSP00000367406 |
| ENSP00000317872 | ENSP00000367527 |
| ENSP00000317872 | ENSP00000369351 |
| ENSP00000317872 | ENSP00000370083 |
| ENSP00000317872 | ENSP00000370119 |
| ENSP00000317872 | ENSP00000378306 |
| ENSP00000317872 | ENSP00000398208 |
| ENSP00000317872 | ENSP00000412566 |
| ENSP00000317872 | ENSP00000417281 |
| ENSP00000317891 | ENSP00000329967 |
| ENSP00000317891 | ENSP00000356785 |
| ENSP00000317891 | ENSP00000358478 |
| ENSP00000317891 | ENSP00000359345 |
| ENSP00000317891 | ENSP00000379612 |
| ENSP00000317895 | ENSP00000409279 |
| ENSP00000317902 | ENSP00000366434 |
| ENSP00000317904 | ENSP00000345464 |
| ENSP00000317904 | ENSP00000348455 |
| ENSP00000317904 | ENSP00000349785 |
| ENSP00000317904 | ENSP00000353698 |
| ENSP00000317904 | ENSP00000355231 |
| ENSP00000317904 | ENSP00000355884 |
| ENSP00000317904 | ENSP00000355955 |
| ENSP00000317904 | ENSP00000356489 |
| ENSP00000317904 | ENSP00000370555 |
| ENSP00000317904 | ENSP00000371236 |
| ENSP00000317904 | ENSP00000380793 |
| ENSP00000317904 | ENSP00000381932 |
| ENSP00000317904 | ENSP00000393832 |
| ENSP00000317955 | ENSP00000334061 |

|                 |                 |
|-----------------|-----------------|
| ENSP00000317955 | ENSP00000337159 |
| ENSP00000317955 | ENSP00000345731 |
| ENSP00000317955 | ENSP00000347076 |
| ENSP00000317955 | ENSP00000348472 |
| ENSP00000317955 | ENSP00000349437 |
| ENSP00000317955 | ENSP00000358423 |
| ENSP00000317955 | ENSP00000358997 |
| ENSP00000317955 | ENSP00000371341 |
| ENSP00000317955 | ENSP00000378338 |
| ENSP00000317955 | ENSP00000381293 |
| ENSP00000317955 | ENSP00000389934 |
| ENSP00000317985 | ENSP00000318195 |
| ENSP00000317985 | ENSP00000348273 |
| ENSP00000317985 | ENSP00000360532 |
| ENSP00000317985 | ENSP00000360922 |
| ENSP00000317992 | ENSP00000318195 |
| ENSP00000317992 | ENSP00000322016 |
| ENSP00000317992 | ENSP00000322396 |
| ENSP00000317992 | ENSP00000323858 |
| ENSP00000317992 | ENSP00000324122 |
| ENSP00000317992 | ENSP00000328690 |
| ENSP00000317992 | ENSP00000329466 |
| ENSP00000317992 | ENSP00000331817 |
| ENSP00000317992 | ENSP00000332340 |
| ENSP00000317992 | ENSP00000338573 |
| ENSP00000317992 | ENSP00000338862 |
| ENSP00000317992 | ENSP00000339145 |
| ENSP00000317992 | ENSP00000339795 |
| ENSP00000317992 | ENSP00000340698 |
| ENSP00000317992 | ENSP00000344504 |
| ENSP00000317992 | ENSP00000346120 |
| ENSP00000317992 | ENSP00000346725 |
| ENSP00000317992 | ENSP00000351596 |
| ENSP00000317992 | ENSP00000352021 |
| ENSP00000317992 | ENSP00000354040 |
| ENSP00000317992 | ENSP00000358563 |
| ENSP00000317992 | ENSP00000358778 |
| ENSP00000317992 | ENSP00000358812 |
| ENSP00000317992 | ENSP00000359345 |
| ENSP00000317992 | ENSP00000359688 |
| ENSP00000317992 | ENSP00000360412 |
| ENSP00000317992 | ENSP00000360828 |
| ENSP00000317992 | ENSP00000361076 |
| ENSP00000317992 | ENSP00000361232 |
| ENSP00000317992 | ENSP00000361949 |
| ENSP00000317992 | ENSP00000361982 |

|                 |                 |
|-----------------|-----------------|
| ENSP00000317992 | ENSP00000362153 |
| ENSP00000317992 | ENSP00000362344 |
| ENSP00000317992 | ENSP00000363559 |
| ENSP00000317992 | ENSP00000364320 |
| ENSP00000317992 | ENSP00000364847 |
| ENSP00000317992 | ENSP00000365806 |
| ENSP00000317992 | ENSP00000366519 |
| ENSP00000317992 | ENSP00000366557 |
| ENSP00000317992 | ENSP00000368887 |
| ENSP00000317992 | ENSP00000370589 |
| ENSP00000317992 | ENSP00000371201 |
| ENSP00000317992 | ENSP00000372199 |
| ENSP00000317992 | ENSP00000373090 |
| ENSP00000317992 | ENSP00000375730 |
| ENSP00000317992 | ENSP00000377640 |
| ENSP00000317992 | ENSP00000377865 |
| ENSP00000317992 | ENSP00000379888 |
| ENSP00000317992 | ENSP00000380495 |
| ENSP00000317992 | ENSP00000380982 |
| ENSP00000317992 | ENSP00000381293 |
| ENSP00000317992 | ENSP00000382392 |
| ENSP00000317992 | ENSP00000388464 |
| ENSP00000317992 | ENSP00000389103 |
| ENSP00000317992 | ENSP00000394290 |
| ENSP00000317992 | ENSP00000402338 |
| ENSP00000317992 | ENSP00000403576 |
| ENSP00000317992 | ENSP00000409074 |
| ENSP00000317992 | ENSP00000409367 |
| ENSP00000317992 | ENSP00000411162 |
| ENSP00000317992 | ENSP00000413152 |
| ENSP00000317992 | ENSP00000417763 |
| ENSP00000317992 | ENSP00000419740 |
| ENSP00000318016 | ENSP00000328062 |
| ENSP00000318029 | ENSP00000356989 |
| ENSP00000318029 | ENSP00000360473 |
| ENSP00000318029 | ENSP00000363734 |
| ENSP00000318029 | ENSP00000372694 |
| ENSP00000318029 | ENSP00000412319 |
| ENSP00000318029 | ENSP00000415678 |
| ENSP00000318085 | ENSP00000356520 |
| ENSP00000318086 | ENSP00000380921 |
| ENSP00000318089 | ENSP00000341551 |
| ENSP00000318089 | ENSP00000347087 |
| ENSP00000318089 | ENSP00000348128 |
| ENSP00000318089 | ENSP00000349486 |
| ENSP00000318089 | ENSP00000369518 |

|                 |                 |
|-----------------|-----------------|
| ENSP00000318115 | ENSP00000331479 |
| ENSP00000318115 | ENSP00000339826 |
| ENSP00000318115 | ENSP00000340019 |
| ENSP00000318115 | ENSP00000360782 |
| ENSP00000318115 | ENSP00000361699 |
| ENSP00000318115 | ENSP00000364847 |
| ENSP00000318115 | ENSP00000365766 |
| ENSP00000318115 | ENSP00000368066 |
| ENSP00000318115 | ENSP00000368523 |
| ENSP00000318115 | ENSP00000374280 |
| ENSP00000318115 | ENSP00000387262 |
| ENSP00000318115 | ENSP00000394049 |
| ENSP00000318115 | ENSP00000403852 |
| ENSP00000318128 | ENSP00000341680 |
| ENSP00000318128 | ENSP00000357674 |
| ENSP00000318128 | ENSP00000380598 |
| ENSP00000318131 | ENSP00000343144 |
| ENSP00000318147 | ENSP00000323313 |
| ENSP00000318147 | ENSP00000356723 |
| ENSP00000318147 | ENSP00000361141 |
| ENSP00000318147 | ENSP00000363021 |
| ENSP00000318158 | ENSP00000346120 |
| ENSP00000318195 | ENSP00000318604 |
| ENSP00000318195 | ENSP00000319169 |
| ENSP00000318195 | ENSP00000319977 |
| ENSP00000318195 | ENSP00000320917 |
| ENSP00000318195 | ENSP00000322396 |
| ENSP00000318195 | ENSP00000326806 |
| ENSP00000318195 | ENSP00000329357 |
| ENSP00000318195 | ENSP00000329466 |
| ENSP00000318195 | ENSP00000329715 |
| ENSP00000318195 | ENSP00000331817 |
| ENSP00000318195 | ENSP00000331879 |
| ENSP00000318195 | ENSP00000332444 |
| ENSP00000318195 | ENSP00000334538 |
| ENSP00000318195 | ENSP00000338862 |
| ENSP00000318195 | ENSP00000339095 |
| ENSP00000318195 | ENSP00000339145 |
| ENSP00000318195 | ENSP00000341243 |
| ENSP00000318195 | ENSP00000345096 |
| ENSP00000318195 | ENSP00000346453 |
| ENSP00000318195 | ENSP00000346725 |
| ENSP00000318195 | ENSP00000347314 |
| ENSP00000318195 | ENSP00000348157 |
| ENSP00000318195 | ENSP00000350491 |
| ENSP00000318195 | ENSP00000352738 |

|                 |                 |
|-----------------|-----------------|
| ENSP00000318195 | ENSP00000352798 |
| ENSP00000318195 | ENSP00000354040 |
| ENSP00000318195 | ENSP00000354125 |
| ENSP00000318195 | ENSP00000354522 |
| ENSP00000318195 | ENSP00000354566 |
| ENSP00000318195 | ENSP00000355153 |
| ENSP00000318195 | ENSP00000355759 |
| ENSP00000318195 | ENSP00000358140 |
| ENSP00000318195 | ENSP00000358563 |
| ENSP00000318195 | ENSP00000358812 |
| ENSP00000318195 | ENSP00000359345 |
| ENSP00000318195 | ENSP00000360286 |
| ENSP00000318195 | ENSP00000360412 |
| ENSP00000318195 | ENSP00000360876 |
| ENSP00000318195 | ENSP00000360922 |
| ENSP00000318195 | ENSP00000361202 |
| ENSP00000318195 | ENSP00000362110 |
| ENSP00000318195 | ENSP00000362334 |
| ENSP00000318195 | ENSP00000362688 |
| ENSP00000318195 | ENSP00000362993 |
| ENSP00000318195 | ENSP00000363944 |
| ENSP00000318195 | ENSP00000364119 |
| ENSP00000318195 | ENSP00000364289 |
| ENSP00000318195 | ENSP00000365016 |
| ENSP00000318195 | ENSP00000366135 |
| ENSP00000318195 | ENSP00000366607 |
| ENSP00000318195 | ENSP00000369042 |
| ENSP00000318195 | ENSP00000370258 |
| ENSP00000318195 | ENSP00000370589 |
| ENSP00000318195 | ENSP00000370968 |
| ENSP00000318195 | ENSP00000372093 |
| ENSP00000318195 | ENSP00000379607 |
| ENSP00000318195 | ENSP00000380129 |
| ENSP00000318195 | ENSP00000380982 |
| ENSP00000318195 | ENSP00000382423 |
| ENSP00000318195 | ENSP00000384490 |
| ENSP00000318195 | ENSP00000391723 |
| ENSP00000318195 | ENSP00000400806 |
| ENSP00000318195 | ENSP00000402338 |
| ENSP00000318195 | ENSP00000412566 |
| ENSP00000318195 | ENSP00000417229 |
| ENSP00000318195 | ENSP00000417281 |
| ENSP00000318262 | ENSP00000349785 |
| ENSP00000318262 | ENSP00000408910 |
| ENSP00000318298 | ENSP00000365131 |
| ENSP00000318313 | ENSP00000329623 |

|                 |                 |
|-----------------|-----------------|
| ENSP00000318313 | ENSP00000334061 |
| ENSP00000318313 | ENSP00000352928 |
| ENSP00000318313 | ENSP00000355231 |
| ENSP00000318313 | ENSP00000355865 |
| ENSP00000318313 | ENSP00000357907 |
| ENSP00000318313 | ENSP00000360473 |
| ENSP00000318313 | ENSP00000384109 |
| ENSP00000318313 | ENSP00000386759 |
| ENSP00000318313 | ENSP00000396937 |
| ENSP00000318318 | ENSP00000332444 |
| ENSP00000318318 | ENSP00000349142 |
| ENSP00000318318 | ENSP00000368589 |
| ENSP00000318351 | ENSP00000327070 |
| ENSP00000318351 | ENSP00000332887 |
| ENSP00000318351 | ENSP00000340019 |
| ENSP00000318351 | ENSP00000342056 |
| ENSP00000318351 | ENSP00000346453 |
| ENSP00000318351 | ENSP00000356405 |
| ENSP00000318351 | ENSP00000358042 |
| ENSP00000318351 | ENSP00000358497 |
| ENSP00000318351 | ENSP00000364035 |
| ENSP00000318351 | ENSP00000364320 |
| ENSP00000318351 | ENSP00000367079 |
| ENSP00000318351 | ENSP00000370377 |
| ENSP00000318351 | ENSP00000380271 |
| ENSP00000318351 | ENSP00000389934 |
| ENSP00000318352 | ENSP00000331310 |
| ENSP00000318352 | ENSP00000347733 |
| ENSP00000318352 | ENSP00000359518 |
| ENSP00000318373 | ENSP00000359837 |
| ENSP00000318374 | ENSP00000322396 |
| ENSP00000318374 | ENSP00000331817 |
| ENSP00000318374 | ENSP00000337405 |
| ENSP00000318374 | ENSP00000360500 |
| ENSP00000318374 | ENSP00000361076 |
| ENSP00000318374 | ENSP00000370083 |
| ENSP00000318374 | ENSP00000370119 |
| ENSP00000318374 | ENSP00000378851 |
| ENSP00000318374 | ENSP00000402338 |
| ENSP00000318602 | ENSP00000341208 |
| ENSP00000318602 | ENSP00000381031 |
| ENSP00000318602 | ENSP00000386394 |
| ENSP00000318604 | ENSP00000325448 |
| ENSP00000318604 | ENSP00000327821 |
| ENSP00000318604 | ENSP00000329029 |
| ENSP00000318604 | ENSP00000330343 |



|                 |                 |
|-----------------|-----------------|
| ENSP00000318604 | ENSP00000331111 |
| ENSP00000318604 | ENSP00000334564 |
| ENSP00000318604 | ENSP00000339145 |
| ENSP00000318604 | ENSP00000348107 |
| ENSP00000318604 | ENSP00000351885 |
| ENSP00000318604 | ENSP00000353246 |
| ENSP00000318604 | ENSP00000354558 |
| ENSP00000318604 | ENSP00000356807 |
| ENSP00000318604 | ENSP00000359531 |
| ENSP00000318604 | ENSP00000361465 |
| ENSP00000318604 | ENSP00000363384 |
| ENSP00000318604 | ENSP00000363559 |
| ENSP00000318604 | ENSP00000364320 |
| ENSP00000318604 | ENSP00000365837 |
| ENSP00000318604 | ENSP00000366828 |
| ENSP00000318604 | ENSP00000366934 |
| ENSP00000318604 | ENSP00000370741 |
| ENSP00000318604 | ENSP00000378736 |
| ENSP00000318604 | ENSP00000381198 |
| ENSP00000318604 | ENSP00000383402 |
| ENSP00000318604 | ENSP00000383503 |
| ENSP00000318604 | ENSP00000384302 |
| ENSP00000318604 | ENSP00000397636 |
| ENSP00000318604 | ENSP00000405636 |
| ENSP00000318604 | ENSP00000406293 |
| ENSP00000318604 | ENSP00000410530 |
| ENSP00000318604 | ENSP00000410954 |
| ENSP00000318604 | ENSP00000414110 |
| ENSP00000318604 | ENSP00000416599 |
| ENSP00000318629 | ENSP00000331201 |
| ENSP00000318629 | ENSP00000354772 |
| ENSP00000318629 | ENSP00000356903 |
| ENSP00000318629 | ENSP00000366565 |
| ENSP00000318629 | ENSP00000368818 |
| ENSP00000318629 | ENSP00000417764 |
| ENSP00000318641 | ENSP00000326379 |
| ENSP00000318641 | ENSP00000327889 |
| ENSP00000318641 | ENSP00000340220 |
| ENSP00000318641 | ENSP00000355961 |
| ENSP00000318641 | ENSP00000360532 |
| ENSP00000318641 | ENSP00000362170 |
| ENSP00000318641 | ENSP00000381064 |
| ENSP00000318641 | ENSP00000385722 |
| ENSP00000318641 | ENSP00000398208 |
| ENSP00000318641 | ENSP00000414237 |
| ENSP00000318641 | ENSP00000418210 |

|                 |                 |
|-----------------|-----------------|
| ENSP00000318646 | ENSP00000322419 |
| ENSP00000318646 | ENSP00000323856 |
| ENSP00000318646 | ENSP00000324122 |
| ENSP00000318646 | ENSP00000326981 |
| ENSP00000318646 | ENSP00000327070 |
| ENSP00000318646 | ENSP00000331019 |
| ENSP00000318646 | ENSP00000333551 |
| ENSP00000318646 | ENSP00000336702 |
| ENSP00000318646 | ENSP00000337127 |
| ENSP00000318646 | ENSP00000339095 |
| ENSP00000318646 | ENSP00000339795 |
| ENSP00000318646 | ENSP00000340281 |
| ENSP00000318646 | ENSP00000341885 |
| ENSP00000318646 | ENSP00000345156 |
| ENSP00000318646 | ENSP00000346015 |
| ENSP00000318646 | ENSP00000346022 |
| ENSP00000318646 | ENSP00000346037 |
| ENSP00000318646 | ENSP00000346050 |
| ENSP00000318646 | ENSP00000346067 |
| ENSP00000318646 | ENSP00000347324 |
| ENSP00000318646 | ENSP00000349016 |
| ENSP00000318646 | ENSP00000354525 |
| ENSP00000318646 | ENSP00000354739 |
| ENSP00000318646 | ENSP00000355471 |
| ENSP00000318646 | ENSP00000356134 |
| ENSP00000318646 | ENSP00000357643 |
| ENSP00000318646 | ENSP00000358140 |
| ENSP00000318646 | ENSP00000358563 |
| ENSP00000318646 | ENSP00000359345 |
| ENSP00000318646 | ENSP00000361076 |
| ENSP00000318646 | ENSP00000361982 |
| ENSP00000318646 | ENSP00000362036 |
| ENSP00000318646 | ENSP00000362744 |
| ENSP00000318646 | ENSP00000363018 |
| ENSP00000318646 | ENSP00000363308 |
| ENSP00000318646 | ENSP00000363676 |
| ENSP00000318646 | ENSP00000364119 |
| ENSP00000318646 | ENSP00000364289 |
| ENSP00000318646 | ENSP00000364320 |
| ENSP00000318646 | ENSP00000368790 |
| ENSP00000318646 | ENSP00000369757 |
| ENSP00000318646 | ENSP00000370589 |
| ENSP00000318646 | ENSP00000372445 |
| ENSP00000318646 | ENSP00000373404 |
| ENSP00000318646 | ENSP00000375730 |
| ENSP00000318646 | ENSP00000379339 |

|                 |                 |
|-----------------|-----------------|
| ENSP00000318646 | ENSP00000379607 |
| ENSP00000318646 | ENSP00000379888 |
| ENSP00000318646 | ENSP00000381031 |
| ENSP00000318646 | ENSP00000386717 |
| ENSP00000318646 | ENSP00000389103 |
| ENSP00000318646 | ENSP00000393241 |
| ENSP00000318646 | ENSP00000402338 |
| ENSP00000318646 | ENSP00000403175 |
| ENSP00000318646 | ENSP00000407401 |
| ENSP00000318646 | ENSP00000412583 |
| ENSP00000318646 | ENSP00000414321 |
| ENSP00000318646 | ENSP00000416110 |
| ENSP00000318646 | ENSP00000420714 |
| ENSP00000318674 | ENSP00000334675 |
| ENSP00000318674 | ENSP00000348089 |
| ENSP00000318674 | ENSP00000350708 |
| ENSP00000318674 | ENSP00000360621 |
| ENSP00000318674 | ENSP00000364270 |
| ENSP00000318723 | ENSP00000357973 |
| ENSP00000318770 | ENSP00000341208 |
| ENSP00000318775 | ENSP00000339109 |
| ENSP00000318775 | ENSP00000340954 |
| ENSP00000318775 | ENSP00000344741 |
| ENSP00000318775 | ENSP00000344936 |
| ENSP00000318775 | ENSP00000346566 |
| ENSP00000318775 | ENSP00000346987 |
| ENSP00000318775 | ENSP00000347719 |
| ENSP00000318775 | ENSP00000348554 |
| ENSP00000318775 | ENSP00000363322 |
| ENSP00000318775 | ENSP00000373474 |
| ENSP00000318775 | ENSP00000378350 |
| ENSP00000318775 | ENSP00000378529 |
| ENSP00000318775 | ENSP00000380921 |
| ENSP00000318775 | ENSP00000394394 |
| ENSP00000318799 | ENSP00000367972 |
| ENSP00000318821 | ENSP00000324292 |
| ENSP00000318821 | ENSP00000343129 |
| ENSP00000318821 | ENSP00000349640 |
| ENSP00000318821 | ENSP00000365637 |
| ENSP00000318821 | ENSP00000370719 |
| ENSP00000318822 | ENSP00000329623 |
| ENSP00000318822 | ENSP00000339191 |
| ENSP00000318822 | ENSP00000347979 |
| ENSP00000318822 | ENSP00000356694 |
| ENSP00000318822 | ENSP00000358022 |
| ENSP00000318822 | ENSP00000360532 |

|                 |                 |
|-----------------|-----------------|
| ENSP00000318822 | ENSP00000363021 |
| ENSP00000318822 | ENSP00000363591 |
| ENSP00000318822 | ENSP00000365025 |
| ENSP00000318822 | ENSP00000366557 |
| ENSP00000318822 | ENSP00000389913 |
| ENSP00000318861 | ENSP00000319341 |
| ENSP00000318861 | ENSP00000323302 |
| ENSP00000318861 | ENSP00000323313 |
| ENSP00000318861 | ENSP00000324122 |
| ENSP00000318861 | ENSP00000324274 |
| ENSP00000318861 | ENSP00000326261 |
| ENSP00000318861 | ENSP00000329466 |
| ENSP00000318861 | ENSP00000331817 |
| ENSP00000318861 | ENSP00000332103 |
| ENSP00000318861 | ENSP00000334148 |
| ENSP00000318861 | ENSP00000335321 |
| ENSP00000318861 | ENSP00000337405 |
| ENSP00000318861 | ENSP00000339090 |
| ENSP00000318861 | ENSP00000342374 |
| ENSP00000318861 | ENSP00000346236 |
| ENSP00000318861 | ENSP00000348010 |
| ENSP00000318861 | ENSP00000351137 |
| ENSP00000318861 | ENSP00000351947 |
| ENSP00000318861 | ENSP00000354518 |
| ENSP00000318861 | ENSP00000355013 |
| ENSP00000318861 | ENSP00000357631 |
| ENSP00000318861 | ENSP00000358605 |
| ENSP00000318861 | ENSP00000360286 |
| ENSP00000318861 | ENSP00000360488 |
| ENSP00000318861 | ENSP00000360497 |
| ENSP00000318861 | ENSP00000360532 |
| ENSP00000318861 | ENSP00000361162 |
| ENSP00000318861 | ENSP00000361557 |
| ENSP00000318861 | ENSP00000361577 |
| ENSP00000318861 | ENSP00000362110 |
| ENSP00000318861 | ENSP00000362936 |
| ENSP00000318861 | ENSP00000363313 |
| ENSP00000318861 | ENSP00000364289 |
| ENSP00000318861 | ENSP00000366557 |
| ENSP00000318861 | ENSP00000370589 |
| ENSP00000318861 | ENSP00000379607 |
| ENSP00000318861 | ENSP00000387170 |
| ENSP00000318861 | ENSP00000391432 |
| ENSP00000318861 | ENSP00000412566 |
| ENSP00000318861 | ENSP00000414634 |
| ENSP00000318884 | ENSP00000322170 |

|                 |                 |
|-----------------|-----------------|
| ENSP00000318884 | ENSP00000322608 |
| ENSP00000318884 | ENSP00000322957 |
| ENSP00000318884 | ENSP00000332592 |
| ENSP00000318884 | ENSP00000346886 |
| ENSP00000318884 | ENSP00000348215 |
| ENSP00000318884 | ENSP00000348349 |
| ENSP00000318884 | ENSP00000351333 |
| ENSP00000318884 | ENSP00000360076 |
| ENSP00000318884 | ENSP00000360183 |
| ENSP00000318884 | ENSP00000365891 |
| ENSP00000318884 | ENSP00000366121 |
| ENSP00000318884 | ENSP00000368801 |
| ENSP00000318884 | ENSP00000370589 |
| ENSP00000318884 | ENSP00000377793 |
| ENSP00000318884 | ENSP00000380450 |
| ENSP00000318884 | ENSP00000381567 |
| ENSP00000318884 | ENSP00000387266 |
| ENSP00000318884 | ENSP00000391249 |
| ENSP00000318884 | ENSP00000393275 |
| ENSP00000318884 | ENSP00000397598 |
| ENSP00000318884 | ENSP00000402084 |
| ENSP00000318884 | ENSP00000407879 |
| ENSP00000318944 | ENSP00000332454 |
| ENSP00000318944 | ENSP00000337501 |
| ENSP00000318944 | ENSP00000353059 |
| ENSP00000318944 | ENSP00000354927 |
| ENSP00000318944 | ENSP00000417748 |
| ENSP00000318977 | ENSP00000322180 |
| ENSP00000318977 | ENSP00000322570 |
| ENSP00000318977 | ENSP00000323439 |
| ENSP00000318977 | ENSP00000325863 |
| ENSP00000318977 | ENSP00000327197 |
| ENSP00000318977 | ENSP00000329466 |
| ENSP00000318977 | ENSP00000336606 |
| ENSP00000318977 | ENSP00000341382 |
| ENSP00000318977 | ENSP00000343190 |
| ENSP00000318977 | ENSP00000343392 |
| ENSP00000318977 | ENSP00000346453 |
| ENSP00000318977 | ENSP00000347978 |
| ENSP00000318977 | ENSP00000349393 |
| ENSP00000318977 | ENSP00000351284 |
| ENSP00000318977 | ENSP00000351697 |
| ENSP00000318977 | ENSP00000352257 |
| ENSP00000318977 | ENSP00000353793 |
| ENSP00000318977 | ENSP00000354522 |
| ENSP00000318977 | ENSP00000354720 |

|                 |                 |
|-----------------|-----------------|
| ENSP00000318977 | ENSP00000354957 |
| ENSP00000318977 | ENSP00000355185 |
| ENSP00000318977 | ENSP00000358019 |
| ENSP00000318977 | ENSP00000358576 |
| ENSP00000318977 | ENSP00000358812 |
| ENSP00000318977 | ENSP00000360216 |
| ENSP00000318977 | ENSP00000360310 |
| ENSP00000318977 | ENSP00000361310 |
| ENSP00000318977 | ENSP00000364270 |
| ENSP00000318977 | ENSP00000365588 |
| ENSP00000318977 | ENSP00000367527 |
| ENSP00000318977 | ENSP00000367787 |
| ENSP00000318977 | ENSP00000368349 |
| ENSP00000318977 | ENSP00000368646 |
| ENSP00000318977 | ENSP00000369335 |
| ENSP00000318977 | ENSP00000369411 |
| ENSP00000318977 | ENSP00000370151 |
| ENSP00000318977 | ENSP00000371475 |
| ENSP00000318977 | ENSP00000373060 |
| ENSP00000318977 | ENSP00000375809 |
| ENSP00000318977 | ENSP00000380504 |
| ENSP00000318977 | ENSP00000384048 |
| ENSP00000318977 | ENSP00000387429 |
| ENSP00000318977 | ENSP00000394791 |
| ENSP00000318977 | ENSP00000396484 |
| ENSP00000318977 | ENSP00000400806 |
| ENSP00000318977 | ENSP00000404318 |
| ENSP00000318977 | ENSP00000406490 |
| ENSP00000318977 | ENSP00000409167 |
| ENSP00000318977 | ENSP00000415212 |
| ENSP00000318977 | ENSP00000416511 |
| ENSP00000318999 | ENSP00000381031 |
| ENSP00000319062 | ENSP00000353701 |
| ENSP00000319062 | ENSP00000376946 |
| ENSP00000319104 | ENSP00000320503 |
| ENSP00000319104 | ENSP00000321711 |
| ENSP00000319104 | ENSP00000329466 |
| ENSP00000319104 | ENSP00000336868 |
| ENSP00000319104 | ENSP00000343741 |
| ENSP00000319104 | ENSP00000344460 |
| ENSP00000319104 | ENSP00000347168 |
| ENSP00000319104 | ENSP00000347733 |
| ENSP00000319104 | ENSP00000349213 |
| ENSP00000319104 | ENSP00000350767 |
| ENSP00000319104 | ENSP00000354977 |
| ENSP00000319104 | ENSP00000355013 |

|                 |                 |
|-----------------|-----------------|
| ENSP00000319104 | ENSP00000356405 |
| ENSP00000319104 | ENSP00000357602 |
| ENSP00000319104 | ENSP00000359939 |
| ENSP00000319104 | ENSP00000361433 |
| ENSP00000319104 | ENSP00000362900 |
| ENSP00000319104 | ENSP00000365025 |
| ENSP00000319104 | ENSP00000366135 |
| ENSP00000319104 | ENSP00000366974 |
| ENSP00000319104 | ENSP00000367034 |
| ENSP00000319104 | ENSP00000372023 |
| ENSP00000319104 | ENSP00000373715 |
| ENSP00000319104 | ENSP00000374280 |
| ENSP00000319104 | ENSP00000393953 |
| ENSP00000319104 | ENSP00000398597 |
| ENSP00000319118 | ENSP00000346879 |
| ENSP00000319169 | ENSP00000322957 |
| ENSP00000319169 | ENSP00000323967 |
| ENSP00000319169 | ENSP00000326477 |
| ENSP00000319169 | ENSP00000329466 |
| ENSP00000319169 | ENSP00000341243 |
| ENSP00000319169 | ENSP00000344241 |
| ENSP00000319169 | ENSP00000345656 |
| ENSP00000319169 | ENSP00000348273 |
| ENSP00000319169 | ENSP00000353622 |
| ENSP00000319169 | ENSP00000354673 |
| ENSP00000319169 | ENSP00000355050 |
| ENSP00000319169 | ENSP00000355884 |
| ENSP00000319169 | ENSP00000355890 |
| ENSP00000319169 | ENSP00000357683 |
| ENSP00000319169 | ENSP00000357965 |
| ENSP00000319169 | ENSP00000358092 |
| ENSP00000319169 | ENSP00000361009 |
| ENSP00000319169 | ENSP00000362110 |
| ENSP00000319169 | ENSP00000362306 |
| ENSP00000319169 | ENSP00000365735 |
| ENSP00000319169 | ENSP00000365877 |
| ENSP00000319169 | ENSP00000367797 |
| ENSP00000319169 | ENSP00000376204 |
| ENSP00000319169 | ENSP00000379607 |
| ENSP00000319169 | ENSP00000380349 |
| ENSP00000319169 | ENSP00000383059 |
| ENSP00000319169 | ENSP00000384048 |
| ENSP00000319169 | ENSP00000384109 |
| ENSP00000319169 | ENSP00000386759 |
| ENSP00000319169 | ENSP00000402084 |
| ENSP00000319169 | ENSP00000408994 |

|                 |                 |
|-----------------|-----------------|
| ENSP00000319169 | ENSP00000412566 |
| ENSP00000319169 | ENSP00000417980 |
| ENSP00000319169 | ENSP00000418734 |
| ENSP00000319170 | ENSP00000326238 |
| ENSP00000319170 | ENSP00000341382 |
| ENSP00000319170 | ENSP00000360777 |
| ENSP00000319170 | ENSP00000362115 |
| ENSP00000319170 | ENSP00000368066 |
| ENSP00000319170 | ENSP00000371888 |
| ENSP00000319170 | ENSP00000384534 |
| ENSP00000319240 | ENSP00000336856 |
| ENSP00000319240 | ENSP00000379607 |
| ENSP00000319279 | ENSP00000350512 |
| ENSP00000319279 | ENSP00000358335 |
| ENSP00000319279 | ENSP00000374455 |
| ENSP00000319279 | ENSP00000380150 |
| ENSP00000319281 | ENSP00000350512 |
| ENSP00000319323 | ENSP00000320309 |
| ENSP00000319323 | ENSP00000349016 |
| ENSP00000319323 | ENSP00000353826 |
| ENSP00000319323 | ENSP00000354876 |
| ENSP00000319323 | ENSP00000361686 |
| ENSP00000319341 | ENSP00000320503 |
| ENSP00000319341 | ENSP00000323302 |
| ENSP00000319341 | ENSP00000324122 |
| ENSP00000319341 | ENSP00000326806 |
| ENSP00000319341 | ENSP00000334148 |
| ENSP00000319341 | ENSP00000337405 |
| ENSP00000319341 | ENSP00000342374 |
| ENSP00000319341 | ENSP00000343742 |
| ENSP00000319341 | ENSP00000346986 |
| ENSP00000319341 | ENSP00000348010 |
| ENSP00000319341 | ENSP00000351137 |
| ENSP00000319341 | ENSP00000357631 |
| ENSP00000319341 | ENSP00000361577 |
| ENSP00000319341 | ENSP00000362110 |
| ENSP00000319341 | ENSP00000363313 |
| ENSP00000319341 | ENSP00000363384 |
| ENSP00000319341 | ENSP00000363708 |
| ENSP00000319341 | ENSP00000364289 |
| ENSP00000319341 | ENSP00000364813 |
| ENSP00000319341 | ENSP00000366030 |
| ENSP00000319341 | ENSP00000366557 |
| ENSP00000319341 | ENSP00000366607 |
| ENSP00000319341 | ENSP00000370083 |
| ENSP00000319341 | ENSP00000371546 |



|                 |                 |
|-----------------|-----------------|
| ENSP00000319341 | ENSP00000372883 |
| ENSP00000319341 | ENSP00000373715 |
| ENSP00000319341 | ENSP00000392270 |
| ENSP00000319341 | ENSP00000403345 |
| ENSP00000319341 | ENSP00000406280 |
| ENSP00000319341 | ENSP00000410758 |
| ENSP00000319341 | ENSP00000414006 |
| ENSP00000319341 | ENSP00000414634 |
| ENSP00000319341 | ENSP00000417686 |
| ENSP00000319417 | ENSP00000333433 |
| ENSP00000319476 | ENSP00000332049 |
| ENSP00000319476 | ENSP00000384432 |
| ENSP00000319482 | ENSP00000350512 |
| ENSP00000319482 | ENSP00000354340 |
| ENSP00000319482 | ENSP00000384109 |
| ENSP00000319501 | ENSP00000354995 |
| ENSP00000319531 | ENSP00000360938 |
| ENSP00000319531 | ENSP00000362334 |
| ENSP00000319531 | ENSP00000367923 |
| ENSP00000319531 | ENSP00000368305 |
| ENSP00000319531 | ENSP00000387262 |
| ENSP00000319610 | ENSP00000351407 |
| ENSP00000319651 | ENSP00000321503 |
| ENSP00000319673 | ENSP00000356562 |
| ENSP00000319713 | ENSP00000362588 |
| ENSP00000319713 | ENSP00000364188 |
| ENSP00000319788 | ENSP00000364929 |
| ENSP00000319799 | ENSP00000355205 |
| ENSP00000319799 | ENSP00000372023 |
| ENSP00000319831 | ENSP00000347301 |
| ENSP00000319831 | ENSP00000355759 |
| ENSP00000319851 | ENSP00000330070 |
| ENSP00000319851 | ENSP00000382327 |
| ENSP00000319918 | ENSP00000339845 |
| ENSP00000319918 | ENSP00000343745 |
| ENSP00000319977 | ENSP00000329419 |
| ENSP00000319977 | ENSP00000333667 |
| ENSP00000319977 | ENSP00000335304 |
| ENSP00000319977 | ENSP00000337477 |
| ENSP00000319977 | ENSP00000340684 |
| ENSP00000319977 | ENSP00000344456 |
| ENSP00000319977 | ENSP00000347979 |
| ENSP00000319977 | ENSP00000350012 |
| ENSP00000319977 | ENSP00000352257 |
| ENSP00000319977 | ENSP00000369757 |
| ENSP00000319977 | ENSP00000377640 |

|                 |                 |
|-----------------|-----------------|
| ENSP00000319977 | ENSP00000379888 |
| ENSP00000319977 | ENSP00000381031 |
| ENSP00000319977 | ENSP00000381891 |
| ENSP00000319977 | ENSP00000398930 |
| ENSP00000319977 | ENSP00000404121 |
| ENSP00000319979 | ENSP00000331268 |
| ENSP00000319979 | ENSP00000333813 |
| ENSP00000319979 | ENSP00000334052 |
| ENSP00000319979 | ENSP00000353104 |
| ENSP00000319979 | ENSP00000353622 |
| ENSP00000319979 | ENSP00000356530 |
| ENSP00000319979 | ENSP00000359848 |
| ENSP00000319979 | ENSP00000360149 |
| ENSP00000319979 | ENSP00000364188 |
| ENSP00000319979 | ENSP00000380793 |
| ENSP00000319979 | ENSP00000401445 |
| ENSP00000319979 | ENSP00000402338 |
| ENSP00000319992 | ENSP00000340019 |
| ENSP00000319992 | ENSP00000370003 |
| ENSP00000320130 | ENSP00000327009 |
| ENSP00000320130 | ENSP00000334188 |
| ENSP00000320130 | ENSP00000337463 |
| ENSP00000320130 | ENSP00000348965 |
| ENSP00000320130 | ENSP00000349679 |
| ENSP00000320130 | ENSP00000351665 |
| ENSP00000320130 | ENSP00000354791 |
| ENSP00000320130 | ENSP00000356579 |
| ENSP00000320130 | ENSP00000360473 |
| ENSP00000320130 | ENSP00000360922 |
| ENSP00000320130 | ENSP00000363734 |
| ENSP00000320130 | ENSP00000367841 |
| ENSP00000320130 | ENSP00000372694 |
| ENSP00000320130 | ENSP00000377793 |
| ENSP00000320130 | ENSP00000380690 |
| ENSP00000320130 | ENSP00000382723 |
| ENSP00000320130 | ENSP00000384573 |
| ENSP00000320130 | ENSP00000388658 |
| ENSP00000320130 | ENSP00000389516 |
| ENSP00000320130 | ENSP00000395863 |
| ENSP00000320130 | ENSP00000401287 |
| ENSP00000320130 | ENSP00000405864 |
| ENSP00000320130 | ENSP00000412319 |
| ENSP00000320130 | ENSP00000412805 |
| ENSP00000320130 | ENSP00000415678 |
| ENSP00000320236 | ENSP00000329558 |
| ENSP00000320236 | ENSP00000352219 |

|                 |                 |
|-----------------|-----------------|
| ENSP00000320236 | ENSP00000354876 |
| ENSP00000320236 | ENSP00000356953 |
| ENSP00000320236 | ENSP00000360782 |
| ENSP00000320236 | ENSP00000361993 |
| ENSP00000320236 | ENSP00000364699 |
| ENSP00000320236 | ENSP00000368066 |
| ENSP00000320251 | ENSP00000352738 |
| ENSP00000320291 | ENSP00000357973 |
| ENSP00000320309 | ENSP00000340019 |
| ENSP00000320309 | ENSP00000340093 |
| ENSP00000320309 | ENSP00000341243 |
| ENSP00000320309 | ENSP00000348886 |
| ENSP00000320309 | ENSP00000351380 |
| ENSP00000320309 | ENSP00000352219 |
| ENSP00000320309 | ENSP00000356405 |
| ENSP00000320309 | ENSP00000356587 |
| ENSP00000320309 | ENSP00000356737 |
| ENSP00000320309 | ENSP00000358140 |
| ENSP00000320309 | ENSP00000362576 |
| ENSP00000320309 | ENSP00000363745 |
| ENSP00000320309 | ENSP00000364794 |
| ENSP00000320309 | ENSP00000368140 |
| ENSP00000320309 | ENSP00000370083 |
| ENSP00000320309 | ENSP00000370119 |
| ENSP00000320309 | ENSP00000370607 |
| ENSP00000320309 | ENSP00000374399 |
| ENSP00000320309 | ENSP00000376946 |
| ENSP00000320309 | ENSP00000394085 |
| ENSP00000320340 | ENSP00000330393 |
| ENSP00000320340 | ENSP00000338191 |
| ENSP00000320340 | ENSP00000345731 |
| ENSP00000320340 | ENSP00000345988 |
| ENSP00000320340 | ENSP00000349238 |
| ENSP00000320340 | ENSP00000353508 |
| ENSP00000320340 | ENSP00000357836 |
| ENSP00000320346 | ENSP00000369695 |
| ENSP00000320346 | ENSP00000380054 |
| ENSP00000320461 | ENSP00000347038 |
| ENSP00000320461 | ENSP00000350215 |
| ENSP00000320461 | ENSP00000351894 |
| ENSP00000320485 | ENSP00000323967 |
| ENSP00000320485 | ENSP00000325120 |
| ENSP00000320485 | ENSP00000325690 |
| ENSP00000320485 | ENSP00000329466 |
| ENSP00000320485 | ENSP00000342434 |
| ENSP00000320485 | ENSP00000342905 |

|                 |                 |
|-----------------|-----------------|
| ENSP00000320485 | ENSP00000345530 |
| ENSP00000320485 | ENSP00000349213 |
| ENSP00000320485 | ENSP00000353622 |
| ENSP00000320485 | ENSP00000357494 |
| ENSP00000320485 | ENSP00000360532 |
| ENSP00000320485 | ENSP00000364929 |
| ENSP00000320485 | ENSP00000368686 |
| ENSP00000320485 | ENSP00000392028 |
| ENSP00000320485 | ENSP00000417281 |
| ENSP00000320488 | ENSP00000331817 |
| ENSP00000320488 | ENSP00000337445 |
| ENSP00000320488 | ENSP00000346725 |
| ENSP00000320488 | ENSP00000348596 |
| ENSP00000320488 | ENSP00000354742 |
| ENSP00000320488 | ENSP00000356744 |
| ENSP00000320488 | ENSP00000359531 |
| ENSP00000320488 | ENSP00000366237 |
| ENSP00000320488 | ENSP00000369335 |
| ENSP00000320488 | ENSP00000369757 |
| ENSP00000320488 | ENSP00000380129 |
| ENSP00000320488 | ENSP00000381237 |
| ENSP00000320488 | ENSP00000390948 |
| ENSP00000320488 | ENSP00000402084 |
| ENSP00000320503 | ENSP00000351596 |
| ENSP00000320503 | ENSP00000351811 |
| ENSP00000320503 | ENSP00000364813 |
| ENSP00000320503 | ENSP00000366843 |
| ENSP00000320503 | ENSP00000368591 |
| ENSP00000320503 | ENSP00000372883 |
| ENSP00000320503 | ENSP00000373715 |
| ENSP00000320503 | ENSP00000403345 |
| ENSP00000320503 | ENSP00000406280 |
| ENSP00000320503 | ENSP00000414006 |
| ENSP00000320503 | ENSP00000414634 |
| ENSP00000320508 | ENSP00000340305 |
| ENSP00000320508 | ENSP00000347836 |
| ENSP00000320508 | ENSP00000348442 |
| ENSP00000320508 | ENSP00000350708 |
| ENSP00000320508 | ENSP00000364847 |
| ENSP00000320508 | ENSP00000392330 |
| ENSP00000320543 | ENSP00000326921 |
| ENSP00000320543 | ENSP00000331201 |
| ENSP00000320543 | ENSP00000334836 |
| ENSP00000320543 | ENSP00000347498 |
| ENSP00000320543 | ENSP00000348215 |
| ENSP00000320543 | ENSP00000350199 |

|                 |                 |
|-----------------|-----------------|
| ENSP00000320543 | ENSP00000357048 |
| ENSP00000320543 | ENSP00000360798 |
| ENSP00000320543 | ENSP00000366121 |
| ENSP00000320543 | ENSP00000370719 |
| ENSP00000320543 | ENSP00000377148 |
| ENSP00000320543 | ENSP00000381577 |
| ENSP00000320543 | ENSP00000386456 |
| ENSP00000320566 | ENSP00000322579 |
| ENSP00000320566 | ENSP00000325863 |
| ENSP00000320566 | ENSP00000327309 |
| ENSP00000320566 | ENSP00000328720 |
| ENSP00000320566 | ENSP00000329933 |
| ENSP00000320566 | ENSP00000331310 |
| ENSP00000320566 | ENSP00000334061 |
| ENSP00000320566 | ENSP00000336842 |
| ENSP00000320566 | ENSP00000343701 |
| ENSP00000320566 | ENSP00000347733 |
| ENSP00000320566 | ENSP00000348551 |
| ENSP00000320566 | ENSP00000350967 |
| ENSP00000320566 | ENSP00000352257 |
| ENSP00000320566 | ENSP00000353622 |
| ENSP00000320566 | ENSP00000354522 |
| ENSP00000320566 | ENSP00000355205 |
| ENSP00000320566 | ENSP00000355866 |
| ENSP00000320566 | ENSP00000356146 |
| ENSP00000320566 | ENSP00000356405 |
| ENSP00000320566 | ENSP00000357887 |
| ENSP00000320566 | ENSP00000357907 |
| ENSP00000320566 | ENSP00000359518 |
| ENSP00000320566 | ENSP00000360116 |
| ENSP00000320566 | ENSP00000360515 |
| ENSP00000320566 | ENSP00000361433 |
| ENSP00000320566 | ENSP00000362166 |
| ENSP00000320566 | ENSP00000362532 |
| ENSP00000320566 | ENSP00000362592 |
| ENSP00000320566 | ENSP00000363313 |
| ENSP00000320566 | ENSP00000363779 |
| ENSP00000320566 | ENSP00000369716 |
| ENSP00000320566 | ENSP00000374213 |
| ENSP00000320566 | ENSP00000380019 |
| ENSP00000320566 | ENSP00000380460 |
| ENSP00000320566 | ENSP00000386759 |
| ENSP00000320566 | ENSP00000397259 |
| ENSP00000320566 | ENSP00000401445 |
| ENSP00000320566 | ENSP00000412922 |
| ENSP00000320604 | ENSP00000325425 |

|                 |                 |
|-----------------|-----------------|
| ENSP00000320604 | ENSP00000330812 |
| ENSP00000320604 | ENSP00000333946 |
| ENSP00000320604 | ENSP00000336712 |
| ENSP00000320604 | ENSP00000341551 |
| ENSP00000320604 | ENSP00000341662 |
| ENSP00000320604 | ENSP00000348602 |
| ENSP00000320604 | ENSP00000348762 |
| ENSP00000320604 | ENSP00000354522 |
| ENSP00000320604 | ENSP00000355517 |
| ENSP00000320604 | ENSP00000357775 |
| ENSP00000320604 | ENSP00000371236 |
| ENSP00000320604 | ENSP00000379430 |
| ENSP00000320604 | ENSP00000386284 |
| ENSP00000320623 | ENSP00000344566 |
| ENSP00000320623 | ENSP00000347345 |
| ENSP00000320623 | ENSP00000351221 |
| ENSP00000320623 | ENSP00000369816 |
| ENSP00000320623 | ENSP00000381031 |
| ENSP00000320646 | ENSP00000347548 |
| ENSP00000320646 | ENSP00000348762 |
| ENSP00000320646 | ENSP00000350012 |
| ENSP00000320646 | ENSP00000352706 |
| ENSP00000320646 | ENSP00000358312 |
| ENSP00000320646 | ENSP00000366748 |
| ENSP00000320646 | ENSP00000382271 |
| ENSP00000320646 | ENSP00000386621 |
| ENSP00000320648 | ENSP00000340879 |
| ENSP00000320648 | ENSP00000343741 |
| ENSP00000320648 | ENSP00000353998 |
| ENSP00000320648 | ENSP00000370151 |
| ENSP00000320648 | ENSP00000372023 |
| ENSP00000320648 | ENSP00000376946 |
| ENSP00000320649 | ENSP00000363708 |
| ENSP00000320650 | ENSP00000329558 |
| ENSP00000320658 | ENSP00000333551 |
| ENSP00000320658 | ENSP00000362036 |
| ENSP00000320658 | ENSP00000362576 |
| ENSP00000320658 | ENSP00000369897 |
| ENSP00000320663 | ENSP00000336752 |
| ENSP00000320754 | ENSP00000340879 |
| ENSP00000320754 | ENSP00000355167 |
| ENSP00000320754 | ENSP00000389175 |
| ENSP00000320758 | ENSP00000322570 |
| ENSP00000320758 | ENSP00000328968 |
| ENSP00000320758 | ENSP00000330485 |
| ENSP00000320758 | ENSP00000338191 |

|                 |                 |
|-----------------|-----------------|
| ENSP00000320758 | ENSP00000344460 |
| ENSP00000320758 | ENSP00000351697 |
| ENSP00000320758 | ENSP00000355133 |
| ENSP00000320758 | ENSP00000356438 |
| ENSP00000320758 | ENSP00000358301 |
| ENSP00000320758 | ENSP00000368349 |
| ENSP00000320758 | ENSP00000368766 |
| ENSP00000320758 | ENSP00000377914 |
| ENSP00000320758 | ENSP00000400258 |
| ENSP00000320768 | ENSP00000333873 |
| ENSP00000320768 | ENSP00000337393 |
| ENSP00000320768 | ENSP00000354927 |
| ENSP00000320768 | ENSP00000358997 |
| ENSP00000320794 | ENSP00000396620 |
| ENSP00000320869 | ENSP00000328203 |
| ENSP00000320885 | ENSP00000324792 |
| ENSP00000320885 | ENSP00000330343 |
| ENSP00000320885 | ENSP00000330408 |
| ENSP00000320885 | ENSP00000348442 |
| ENSP00000320885 | ENSP00000354957 |
| ENSP00000320885 | ENSP00000357887 |
| ENSP00000320885 | ENSP00000357907 |
| ENSP00000320885 | ENSP00000360412 |
| ENSP00000320885 | ENSP00000366565 |
| ENSP00000320885 | ENSP00000396704 |
| ENSP00000320886 | ENSP00000386394 |
| ENSP00000320898 | ENSP00000371475 |
| ENSP00000320917 | ENSP00000323858 |
| ENSP00000320917 | ENSP00000324122 |
| ENSP00000320917 | ENSP00000326981 |
| ENSP00000320917 | ENSP00000327179 |
| ENSP00000320917 | ENSP00000328690 |
| ENSP00000320917 | ENSP00000329466 |
| ENSP00000320917 | ENSP00000331817 |
| ENSP00000320917 | ENSP00000332340 |
| ENSP00000320917 | ENSP00000346120 |
| ENSP00000320917 | ENSP00000358563 |
| ENSP00000320917 | ENSP00000358812 |
| ENSP00000320917 | ENSP00000360031 |
| ENSP00000320917 | ENSP00000360828 |
| ENSP00000320917 | ENSP00000361076 |
| ENSP00000320917 | ENSP00000361232 |
| ENSP00000320917 | ENSP00000361982 |
| ENSP00000320917 | ENSP00000362744 |
| ENSP00000320917 | ENSP00000366557 |
| ENSP00000320917 | ENSP00000366974 |

|                 |                 |
|-----------------|-----------------|
| ENSP00000320917 | ENSP00000370589 |
| ENSP00000320917 | ENSP00000372199 |
| ENSP00000320917 | ENSP00000374390 |
| ENSP00000320917 | ENSP00000379607 |
| ENSP00000320917 | ENSP00000379888 |
| ENSP00000320917 | ENSP00000380495 |
| ENSP00000320917 | ENSP00000384490 |
| ENSP00000320917 | ENSP00000392601 |
| ENSP00000320924 | ENSP00000348215 |
| ENSP00000320924 | ENSP00000348602 |
| ENSP00000320924 | ENSP00000359380 |
| ENSP00000320924 | ENSP00000360798 |
| ENSP00000320924 | ENSP00000365891 |
| ENSP00000320924 | ENSP00000366121 |
| ENSP00000320924 | ENSP00000378624 |
| ENSP00000320924 | ENSP00000379709 |
| ENSP00000320924 | ENSP00000380450 |
| ENSP00000320924 | ENSP00000380921 |
| ENSP00000320924 | ENSP00000381045 |
| ENSP00000320924 | ENSP00000386161 |
| ENSP00000320924 | ENSP00000407487 |
| ENSP00000320924 | ENSP00000413625 |
| ENSP00000320936 | ENSP00000337432 |
| ENSP00000320936 | ENSP00000345984 |
| ENSP00000320949 | ENSP00000328079 |
| ENSP00000320949 | ENSP00000329419 |
| ENSP00000320949 | ENSP00000329466 |
| ENSP00000320949 | ENSP00000332444 |
| ENSP00000320949 | ENSP00000341243 |
| ENSP00000320949 | ENSP00000344537 |
| ENSP00000320949 | ENSP00000349016 |
| ENSP00000320949 | ENSP00000354633 |
| ENSP00000320949 | ENSP00000354673 |
| ENSP00000320949 | ENSP00000356448 |
| ENSP00000320949 | ENSP00000357048 |
| ENSP00000320949 | ENSP00000357440 |
| ENSP00000320949 | ENSP00000357907 |
| ENSP00000320949 | ENSP00000359067 |
| ENSP00000320949 | ENSP00000359444 |
| ENSP00000320949 | ENSP00000360515 |
| ENSP00000320949 | ENSP00000360532 |
| ENSP00000320949 | ENSP00000364813 |
| ENSP00000320949 | ENSP00000366974 |
| ENSP00000320949 | ENSP00000367407 |
| ENSP00000320949 | ENSP00000369965 |
| ENSP00000320949 | ENSP00000372883 |



|                 |                 |
|-----------------|-----------------|
| ENSP00000320949 | ENSP00000374529 |
| ENSP00000320949 | ENSP00000378529 |
| ENSP00000320949 | ENSP00000387170 |
| ENSP00000320949 | ENSP00000391723 |
| ENSP00000320949 | ENSP00000393275 |
| ENSP00000320949 | ENSP00000401508 |
| ENSP00000320949 | ENSP00000403345 |
| ENSP00000320949 | ENSP00000406280 |
| ENSP00000320949 | ENSP00000414006 |
| ENSP00000320949 | ENSP00000414634 |
| ENSP00000320951 | ENSP00000324633 |
| ENSP00000321106 | ENSP00000334042 |
| ENSP00000321106 | ENSP00000346839 |
| ENSP00000321106 | ENSP00000358106 |
| ENSP00000321106 | ENSP00000365131 |
| ENSP00000321203 | ENSP00000361014 |
| ENSP00000321203 | ENSP00000364893 |
| ENSP00000321203 | ENSP00000392617 |
| ENSP00000321239 | ENSP00000341243 |
| ENSP00000321239 | ENSP00000344668 |
| ENSP00000321239 | ENSP00000346037 |
| ENSP00000321239 | ENSP00000348538 |
| ENSP00000321239 | ENSP00000350509 |
| ENSP00000321239 | ENSP00000350633 |
| ENSP00000321239 | ENSP00000356641 |
| ENSP00000321239 | ENSP00000356737 |
| ENSP00000321239 | ENSP00000361310 |
| ENSP00000321239 | ENSP00000363832 |
| ENSP00000321239 | ENSP00000368646 |
| ENSP00000321239 | ENSP00000417281 |
| ENSP00000321259 | ENSP00000323313 |
| ENSP00000321259 | ENSP00000332513 |
| ENSP00000321259 | ENSP00000338703 |
| ENSP00000321259 | ENSP00000342026 |
| ENSP00000321259 | ENSP00000342032 |
| ENSP00000321259 | ENSP00000356405 |
| ENSP00000321259 | ENSP00000363559 |
| ENSP00000321259 | ENSP00000365534 |
| ENSP00000321259 | ENSP00000366620 |
| ENSP00000321259 | ENSP00000367992 |
| ENSP00000321259 | ENSP00000368646 |
| ENSP00000321259 | ENSP00000369100 |
| ENSP00000321259 | ENSP00000369716 |
| ENSP00000321259 | ENSP00000370517 |
| ENSP00000321259 | ENSP00000379678 |
| ENSP00000321320 | ENSP00000321810 |

|                 |                 |
|-----------------|-----------------|
| ENSP00000321320 | ENSP00000325377 |
| ENSP00000321320 | ENSP00000345793 |
| ENSP00000321320 | ENSP00000353998 |
| ENSP00000321320 | ENSP00000356448 |
| ENSP00000321320 | ENSP00000360329 |
| ENSP00000321320 | ENSP00000376946 |
| ENSP00000321320 | ENSP00000381293 |
| ENSP00000321326 | ENSP00000339191 |
| ENSP00000321326 | ENSP00000355146 |
| ENSP00000321326 | ENSP00000358563 |
| ENSP00000321334 | ENSP00000346839 |
| ENSP00000321386 | ENSP00000334675 |
| ENSP00000321386 | ENSP00000348089 |
| ENSP00000321386 | ENSP00000350708 |
| ENSP00000321386 | ENSP00000360621 |
| ENSP00000321386 | ENSP00000364270 |
| ENSP00000321445 | ENSP00000331057 |
| ENSP00000321445 | ENSP00000381031 |
| ENSP00000321449 | ENSP00000327179 |
| ENSP00000321449 | ENSP00000328720 |
| ENSP00000321449 | ENSP00000328854 |
| ENSP00000321449 | ENSP00000329466 |
| ENSP00000321449 | ENSP00000331019 |
| ENSP00000321449 | ENSP00000333376 |
| ENSP00000321449 | ENSP00000334808 |
| ENSP00000321449 | ENSP00000343190 |
| ENSP00000321449 | ENSP00000350009 |
| ENSP00000321449 | ENSP00000355541 |
| ENSP00000321449 | ENSP00000358563 |
| ENSP00000321449 | ENSP00000358812 |
| ENSP00000321449 | ENSP00000361642 |
| ENSP00000321449 | ENSP00000361982 |
| ENSP00000321449 | ENSP00000363746 |
| ENSP00000321449 | ENSP00000364293 |
| ENSP00000321449 | ENSP00000364320 |
| ENSP00000321449 | ENSP00000366557 |
| ENSP00000321449 | ENSP00000371101 |
| ENSP00000321449 | ENSP00000371169 |
| ENSP00000321449 | ENSP00000372695 |
| ENSP00000321449 | ENSP00000381863 |
| ENSP00000321449 | ENSP00000384302 |
| ENSP00000321449 | ENSP00000399454 |
| ENSP00000321449 | ENSP00000402869 |
| ENSP00000321449 | ENSP00000405614 |
| ENSP00000321449 | ENSP00000410396 |
| ENSP00000321503 | ENSP00000329466 |

|                 |                 |
|-----------------|-----------------|
| ENSP00000321503 | ENSP00000352676 |
| ENSP00000321503 | ENSP00000357051 |
| ENSP00000321503 | ENSP00000361202 |
| ENSP00000321503 | ENSP00000362306 |
| ENSP00000321503 | ENSP00000364204 |
| ENSP00000321503 | ENSP00000365016 |
| ENSP00000321503 | ENSP00000379607 |
| ENSP00000321503 | ENSP00000383909 |
| ENSP00000321546 | ENSP00000322016 |
| ENSP00000321546 | ENSP00000357674 |
| ENSP00000321606 | ENSP00000331201 |
| ENSP00000321606 | ENSP00000337838 |
| ENSP00000321606 | ENSP00000347184 |
| ENSP00000321606 | ENSP00000348708 |
| ENSP00000321606 | ENSP00000355890 |
| ENSP00000321606 | ENSP00000379839 |
| ENSP00000321617 | ENSP00000329933 |
| ENSP00000321617 | ENSP00000331310 |
| ENSP00000321617 | ENSP00000331487 |
| ENSP00000321617 | ENSP00000336842 |
| ENSP00000321617 | ENSP00000337127 |
| ENSP00000321617 | ENSP00000343001 |
| ENSP00000321617 | ENSP00000347602 |
| ENSP00000321617 | ENSP00000347719 |
| ENSP00000321617 | ENSP00000353622 |
| ENSP00000321617 | ENSP00000354558 |
| ENSP00000321617 | ENSP00000360270 |
| ENSP00000321617 | ENSP00000361845 |
| ENSP00000321617 | ENSP00000363338 |
| ENSP00000321617 | ENSP00000379457 |
| ENSP00000321617 | ENSP00000380460 |
| ENSP00000321617 | ENSP00000411409 |
| ENSP00000321636 | ENSP00000322242 |
| ENSP00000321636 | ENSP00000323439 |
| ENSP00000321636 | ENSP00000325863 |
| ENSP00000321636 | ENSP00000328940 |
| ENSP00000321636 | ENSP00000334474 |
| ENSP00000321636 | ENSP00000334675 |
| ENSP00000321636 | ENSP00000336606 |
| ENSP00000321636 | ENSP00000341382 |
| ENSP00000321636 | ENSP00000341885 |
| ENSP00000321636 | ENSP00000343392 |
| ENSP00000321636 | ENSP00000343741 |
| ENSP00000321636 | ENSP00000346067 |
| ENSP00000321636 | ENSP00000347232 |
| ENSP00000321636 | ENSP00000351284 |

|                 |                 |
|-----------------|-----------------|
| ENSP00000321636 | ENSP00000353332 |
| ENSP00000321636 | ENSP00000353793 |
| ENSP00000321636 | ENSP00000354522 |
| ENSP00000321636 | ENSP00000354720 |
| ENSP00000321636 | ENSP00000354957 |
| ENSP00000321636 | ENSP00000358478 |
| ENSP00000321636 | ENSP00000359552 |
| ENSP00000321636 | ENSP00000361465 |
| ENSP00000321636 | ENSP00000364270 |
| ENSP00000321636 | ENSP00000365588 |
| ENSP00000321636 | ENSP00000367029 |
| ENSP00000321636 | ENSP00000367910 |
| ENSP00000321636 | ENSP00000368438 |
| ENSP00000321636 | ENSP00000369335 |
| ENSP00000321636 | ENSP00000369411 |
| ENSP00000321636 | ENSP00000370150 |
| ENSP00000321636 | ENSP00000370151 |
| ENSP00000321636 | ENSP00000371475 |
| ENSP00000321636 | ENSP00000372023 |
| ENSP00000321636 | ENSP00000373060 |
| ENSP00000321636 | ENSP00000373952 |
| ENSP00000321636 | ENSP00000375809 |
| ENSP00000321636 | ENSP00000377954 |
| ENSP00000321636 | ENSP00000384048 |
| ENSP00000321636 | ENSP00000387429 |
| ENSP00000321636 | ENSP00000394649 |
| ENSP00000321636 | ENSP00000403852 |
| ENSP00000321636 | ENSP00000404318 |
| ENSP00000321636 | ENSP00000406868 |
| ENSP00000321636 | ENSP00000409167 |
| ENSP00000321636 | ENSP00000420588 |
| ENSP00000321706 | ENSP00000322716 |
| ENSP00000321706 | ENSP00000325448 |
| ENSP00000321706 | ENSP00000328940 |
| ENSP00000321706 | ENSP00000329466 |
| ENSP00000321706 | ENSP00000340698 |
| ENSP00000321706 | ENSP00000342374 |
| ENSP00000321706 | ENSP00000343785 |
| ENSP00000321706 | ENSP00000344572 |
| ENSP00000321706 | ENSP00000349124 |
| ENSP00000321706 | ENSP00000353073 |
| ENSP00000321706 | ENSP00000356520 |
| ENSP00000321706 | ENSP00000358716 |
| ENSP00000321706 | ENSP00000360532 |
| ENSP00000321706 | ENSP00000365318 |
| ENSP00000321706 | ENSP00000370083 |

|                 |                 |
|-----------------|-----------------|
| ENSP00000321706 | ENSP00000370119 |
| ENSP00000321706 | ENSP00000374455 |
| ENSP00000321706 | ENSP00000379607 |
| ENSP00000321706 | ENSP00000383142 |
| ENSP00000321706 | ENSP00000387170 |
| ENSP00000321706 | ENSP00000412566 |
| ENSP00000321711 | ENSP00000323046 |
| ENSP00000321711 | ENSP00000325677 |
| ENSP00000321711 | ENSP00000326981 |
| ENSP00000321711 | ENSP00000337405 |
| ENSP00000321711 | ENSP00000339845 |
| ENSP00000321711 | ENSP00000340954 |
| ENSP00000321711 | ENSP00000343701 |
| ENSP00000321711 | ENSP00000343745 |
| ENSP00000321711 | ENSP00000346236 |
| ENSP00000321711 | ENSP00000348107 |
| ENSP00000321711 | ENSP00000348442 |
| ENSP00000321711 | ENSP00000348784 |
| ENSP00000321711 | ENSP00000350708 |
| ENSP00000321711 | ENSP00000351113 |
| ENSP00000321711 | ENSP00000352678 |
| ENSP00000321711 | ENSP00000352738 |
| ENSP00000321711 | ENSP00000353622 |
| ENSP00000321711 | ENSP00000354558 |
| ENSP00000321711 | ENSP00000354927 |
| ENSP00000321711 | ENSP00000356811 |
| ENSP00000321711 | ENSP00000359552 |
| ENSP00000321711 | ENSP00000359939 |
| ENSP00000321711 | ENSP00000360473 |
| ENSP00000321711 | ENSP00000361433 |
| ENSP00000321711 | ENSP00000361465 |
| ENSP00000321711 | ENSP00000362110 |
| ENSP00000321711 | ENSP00000362334 |
| ENSP00000321711 | ENSP00000364289 |
| ENSP00000321711 | ENSP00000364895 |
| ENSP00000321711 | ENSP00000365005 |
| ENSP00000321711 | ENSP00000366135 |
| ENSP00000321711 | ENSP00000368984 |
| ENSP00000321711 | ENSP00000370589 |
| ENSP00000321711 | ENSP00000373715 |
| ENSP00000321711 | ENSP00000378306 |
| ENSP00000321711 | ENSP00000379093 |
| ENSP00000321711 | ENSP00000382423 |
| ENSP00000321711 | ENSP00000387170 |
| ENSP00000321711 | ENSP00000391723 |
| ENSP00000321711 | ENSP00000396937 |

|                 |                 |
|-----------------|-----------------|
| ENSP00000321711 | ENSP00000398597 |
| ENSP00000321711 | ENSP00000401445 |
| ENSP00000321711 | ENSP00000401508 |
| ENSP00000321711 | ENSP00000402240 |
| ENSP00000321711 | ENSP00000403852 |
| ENSP00000321711 | ENSP00000411409 |
| ENSP00000321724 | ENSP00000337396 |
| ENSP00000321797 | ENSP00000339826 |
| ENSP00000321810 | ENSP00000327821 |
| ENSP00000321810 | ENSP00000328671 |
| ENSP00000321810 | ENSP00000339435 |
| ENSP00000321810 | ENSP00000354673 |
| ENSP00000321810 | ENSP00000356476 |
| ENSP00000321810 | ENSP00000367637 |
| ENSP00000321810 | ENSP00000380982 |
| ENSP00000321853 | ENSP00000392330 |
| ENSP00000321927 | ENSP00000334675 |
| ENSP00000321927 | ENSP00000348089 |
| ENSP00000321927 | ENSP00000350708 |
| ENSP00000321927 | ENSP00000360621 |
| ENSP00000321927 | ENSP00000364270 |
| ENSP00000321927 | ENSP00000366121 |
| ENSP00000321999 | ENSP00000379213 |
| ENSP00000322016 | ENSP00000322396 |
| ENSP00000322016 | ENSP00000326261 |
| ENSP00000322016 | ENSP00000326981 |
| ENSP00000322016 | ENSP00000329466 |
| ENSP00000322016 | ENSP00000335321 |
| ENSP00000322016 | ENSP00000337445 |
| ENSP00000322016 | ENSP00000337501 |
| ENSP00000322016 | ENSP00000338703 |
| ENSP00000322016 | ENSP00000346453 |
| ENSP00000322016 | ENSP00000346725 |
| ENSP00000322016 | ENSP00000346986 |
| ENSP00000322016 | ENSP00000347592 |
| ENSP00000322016 | ENSP00000347997 |
| ENSP00000322016 | ENSP00000348573 |
| ENSP00000322016 | ENSP00000350708 |
| ENSP00000322016 | ENSP00000354883 |
| ENSP00000322016 | ENSP00000356411 |
| ENSP00000322016 | ENSP00000359988 |
| ENSP00000322016 | ENSP00000360147 |
| ENSP00000322016 | ENSP00000360215 |
| ENSP00000322016 | ENSP00000361949 |
| ENSP00000322016 | ENSP00000362110 |
| ENSP00000322016 | ENSP00000364261 |

|                 |                 |
|-----------------|-----------------|
| ENSP00000322016 | ENSP00000364486 |
| ENSP00000322016 | ENSP00000365678 |
| ENSP00000322016 | ENSP00000368801 |
| ENSP00000322016 | ENSP00000369531 |
| ENSP00000322016 | ENSP00000371634 |
| ENSP00000322016 | ENSP00000376309 |
| ENSP00000322016 | ENSP00000379607 |
| ENSP00000322016 | ENSP00000381031 |
| ENSP00000322016 | ENSP00000381216 |
| ENSP00000322016 | ENSP00000409279 |
| ENSP00000322016 | ENSP00000417748 |
| ENSP00000322170 | ENSP00000326238 |
| ENSP00000322170 | ENSP00000326514 |
| ENSP00000322170 | ENSP00000333950 |
| ENSP00000322170 | ENSP00000334061 |
| ENSP00000322170 | ENSP00000336702 |
| ENSP00000322170 | ENSP00000346791 |
| ENSP00000322170 | ENSP00000359000 |
| ENSP00000322170 | ENSP00000361824 |
| ENSP00000322170 | ENSP00000362413 |
| ENSP00000322170 | ENSP00000376410 |
| ENSP00000322170 | ENSP00000380129 |
| ENSP00000322170 | ENSP00000397351 |
| ENSP00000322170 | ENSP00000402084 |
| ENSP00000322180 | ENSP00000322570 |
| ENSP00000322180 | ENSP00000322957 |
| ENSP00000322180 | ENSP00000323439 |
| ENSP00000322180 | ENSP00000324020 |
| ENSP00000322180 | ENSP00000325017 |
| ENSP00000322180 | ENSP00000325863 |
| ENSP00000322180 | ENSP00000334188 |
| ENSP00000322180 | ENSP00000336606 |
| ENSP00000322180 | ENSP00000336842 |
| ENSP00000322180 | ENSP00000340879 |
| ENSP00000322180 | ENSP00000341382 |
| ENSP00000322180 | ENSP00000343741 |
| ENSP00000322180 | ENSP00000346566 |
| ENSP00000322180 | ENSP00000347232 |
| ENSP00000322180 | ENSP00000347719 |
| ENSP00000322180 | ENSP00000351284 |
| ENSP00000322180 | ENSP00000351697 |
| ENSP00000322180 | ENSP00000353793 |
| ENSP00000322180 | ENSP00000354522 |
| ENSP00000322180 | ENSP00000354720 |
| ENSP00000322180 | ENSP00000355560 |
| ENSP00000322180 | ENSP00000355922 |

|                 |                 |
|-----------------|-----------------|
| ENSP00000322180 | ENSP00000356319 |
| ENSP00000322180 | ENSP00000356989 |
| ENSP00000322180 | ENSP00000357651 |
| ENSP00000322180 | ENSP00000358886 |
| ENSP00000322180 | ENSP00000360310 |
| ENSP00000322180 | ENSP00000360473 |
| ENSP00000322180 | ENSP00000361990 |
| ENSP00000322180 | ENSP00000363021 |
| ENSP00000322180 | ENSP00000363734 |
| ENSP00000322180 | ENSP00000365775 |
| ENSP00000322180 | ENSP00000366974 |
| ENSP00000322180 | ENSP00000367299 |
| ENSP00000322180 | ENSP00000368349 |
| ENSP00000322180 | ENSP00000368438 |
| ENSP00000322180 | ENSP00000368976 |
| ENSP00000322180 | ENSP00000369335 |
| ENSP00000322180 | ENSP00000369411 |
| ENSP00000322180 | ENSP00000369716 |
| ENSP00000322180 | ENSP00000370151 |
| ENSP00000322180 | ENSP00000371475 |
| ENSP00000322180 | ENSP00000372694 |
| ENSP00000322180 | ENSP00000374213 |
| ENSP00000322180 | ENSP00000374280 |
| ENSP00000322180 | ENSP00000374566 |
| ENSP00000322180 | ENSP00000375986 |
| ENSP00000322180 | ENSP00000377747 |
| ENSP00000322180 | ENSP00000377793 |
| ENSP00000322180 | ENSP00000381290 |
| ENSP00000322180 | ENSP00000382562 |
| ENSP00000322180 | ENSP00000386759 |
| ENSP00000322180 | ENSP00000392028 |
| ENSP00000322180 | ENSP00000396068 |
| ENSP00000322180 | ENSP00000404658 |
| ENSP00000322180 | ENSP00000412319 |
| ENSP00000322180 | ENSP00000415678 |
| ENSP00000322180 | ENSP00000417963 |
| ENSP00000322181 | ENSP00000357384 |
| ENSP00000322181 | ENSP00000360644 |
| ENSP00000322181 | ENSP00000369820 |
| ENSP00000322181 | ENSP00000378723 |
| ENSP00000322181 | ENSP00000420037 |
| ENSP00000322218 | ENSP00000345656 |
| ENSP00000322218 | ENSP00000345988 |
| ENSP00000322218 | ENSP00000346155 |
| ENSP00000322218 | ENSP00000348577 |
| ENSP00000322218 | ENSP00000349238 |



|                 |                 |
|-----------------|-----------------|
| ENSP00000322218 | ENSP00000351908 |
| ENSP00000322218 | ENSP00000352219 |
| ENSP00000322218 | ENSP00000361141 |
| ENSP00000322218 | ENSP00000361667 |
| ENSP00000322218 | ENSP00000362751 |
| ENSP00000322218 | ENSP00000369860 |
| ENSP00000322218 | ENSP00000369862 |
| ENSP00000322218 | ENSP00000413405 |
| ENSP00000322238 | ENSP00000353538 |
| ENSP00000322242 | ENSP00000323687 |
| ENSP00000322242 | ENSP00000324792 |
| ENSP00000322242 | ENSP00000325863 |
| ENSP00000322242 | ENSP00000327197 |
| ENSP00000322242 | ENSP00000330343 |
| ENSP00000322242 | ENSP00000331310 |
| ENSP00000322242 | ENSP00000334188 |
| ENSP00000322242 | ENSP00000334474 |
| ENSP00000322242 | ENSP00000338345 |
| ENSP00000322242 | ENSP00000340305 |
| ENSP00000322242 | ENSP00000347232 |
| ENSP00000322242 | ENSP00000347602 |
| ENSP00000322242 | ENSP00000347836 |
| ENSP00000322242 | ENSP00000351284 |
| ENSP00000322242 | ENSP00000356989 |
| ENSP00000322242 | ENSP00000360116 |
| ENSP00000322242 | ENSP00000360473 |
| ENSP00000322242 | ENSP00000366135 |
| ENSP00000322242 | ENSP00000377655 |
| ENSP00000322242 | ENSP00000377793 |
| ENSP00000322242 | ENSP00000379217 |
| ENSP00000322242 | ENSP00000380460 |
| ENSP00000322242 | ENSP00000383719 |
| ENSP00000322242 | ENSP00000386759 |
| ENSP00000322242 | ENSP00000394791 |
| ENSP00000322242 | ENSP00000402527 |
| ENSP00000322242 | ENSP00000417281 |
| ENSP00000322304 | ENSP00000369860 |
| ENSP00000322304 | ENSP00000381293 |
| ENSP00000322316 | ENSP00000353622 |
| ENSP00000322316 | ENSP00000355739 |
| ENSP00000322316 | ENSP00000359385 |
| ENSP00000322316 | ENSP00000367992 |
| ENSP00000322316 | ENSP00000368140 |
| ENSP00000322316 | ENSP00000373474 |
| ENSP00000322396 | ENSP00000323424 |
| ENSP00000322396 | ENSP00000323780 |

|                 |                 |
|-----------------|-----------------|
| ENSP00000322396 | ENSP00000323858 |
| ENSP00000322396 | ENSP00000326806 |
| ENSP00000322396 | ENSP00000328690 |
| ENSP00000322396 | ENSP00000329466 |
| ENSP00000322396 | ENSP00000331817 |
| ENSP00000322396 | ENSP00000332340 |
| ENSP00000322396 | ENSP00000338573 |
| ENSP00000322396 | ENSP00000338862 |
| ENSP00000322396 | ENSP00000345917 |
| ENSP00000322396 | ENSP00000346015 |
| ENSP00000322396 | ENSP00000346120 |
| ENSP00000322396 | ENSP00000346725 |
| ENSP00000322396 | ENSP00000350512 |
| ENSP00000322396 | ENSP00000351015 |
| ENSP00000322396 | ENSP00000352738 |
| ENSP00000322396 | ENSP00000353059 |
| ENSP00000322396 | ENSP00000354040 |
| ENSP00000322396 | ENSP00000354560 |
| ENSP00000322396 | ENSP00000355541 |
| ENSP00000322396 | ENSP00000358563 |
| ENSP00000322396 | ENSP00000358812 |
| ENSP00000322396 | ENSP00000359345 |
| ENSP00000322396 | ENSP00000360412 |
| ENSP00000322396 | ENSP00000360828 |
| ENSP00000322396 | ENSP00000361010 |
| ENSP00000322396 | ENSP00000361076 |
| ENSP00000322396 | ENSP00000361232 |
| ENSP00000322396 | ENSP00000361982 |
| ENSP00000322396 | ENSP00000362153 |
| ENSP00000322396 | ENSP00000363391 |
| ENSP00000322396 | ENSP00000363676 |
| ENSP00000322396 | ENSP00000364320 |
| ENSP00000322396 | ENSP00000364543 |
| ENSP00000322396 | ENSP00000365806 |
| ENSP00000322396 | ENSP00000366519 |
| ENSP00000322396 | ENSP00000366557 |
| ENSP00000322396 | ENSP00000369695 |
| ENSP00000322396 | ENSP00000370736 |
| ENSP00000322396 | ENSP00000370968 |
| ENSP00000322396 | ENSP00000371201 |
| ENSP00000322396 | ENSP00000372827 |
| ENSP00000322396 | ENSP00000373090 |
| ENSP00000322396 | ENSP00000377344 |
| ENSP00000322396 | ENSP00000379607 |
| ENSP00000322396 | ENSP00000380495 |
| ENSP00000322396 | ENSP00000381657 |

|                 |                 |
|-----------------|-----------------|
| ENSP00000322396 | ENSP00000382392 |
| ENSP00000322396 | ENSP00000384015 |
| ENSP00000322396 | ENSP00000388464 |
| ENSP00000322396 | ENSP00000394290 |
| ENSP00000322396 | ENSP00000394400 |
| ENSP00000322396 | ENSP00000396937 |
| ENSP00000322396 | ENSP00000399530 |
| ENSP00000322396 | ENSP00000400626 |
| ENSP00000322396 | ENSP00000402338 |
| ENSP00000322396 | ENSP00000403576 |
| ENSP00000322396 | ENSP00000409074 |
| ENSP00000322396 | ENSP00000409367 |
| ENSP00000322396 | ENSP00000411162 |
| ENSP00000322396 | ENSP00000412310 |
| ENSP00000322396 | ENSP00000413152 |
| ENSP00000322396 | ENSP00000419740 |
| ENSP00000322419 | ENSP00000326981 |
| ENSP00000322419 | ENSP00000329466 |
| ENSP00000322419 | ENSP00000339095 |
| ENSP00000322419 | ENSP00000339795 |
| ENSP00000322419 | ENSP00000341947 |
| ENSP00000322419 | ENSP00000345156 |
| ENSP00000322419 | ENSP00000346015 |
| ENSP00000322419 | ENSP00000346022 |
| ENSP00000322419 | ENSP00000346027 |
| ENSP00000322419 | ENSP00000346037 |
| ENSP00000322419 | ENSP00000346050 |
| ENSP00000322419 | ENSP00000346088 |
| ENSP00000322419 | ENSP00000347329 |
| ENSP00000322419 | ENSP00000354525 |
| ENSP00000322419 | ENSP00000354739 |
| ENSP00000322419 | ENSP00000359345 |
| ENSP00000322419 | ENSP00000360286 |
| ENSP00000322419 | ENSP00000361076 |
| ENSP00000322419 | ENSP00000363018 |
| ENSP00000322419 | ENSP00000363676 |
| ENSP00000322419 | ENSP00000364320 |
| ENSP00000322419 | ENSP00000366135 |
| ENSP00000322419 | ENSP00000371451 |
| ENSP00000322419 | ENSP00000373404 |
| ENSP00000322419 | ENSP00000373715 |
| ENSP00000322419 | ENSP00000375730 |
| ENSP00000322419 | ENSP00000377640 |
| ENSP00000322419 | ENSP00000377865 |
| ENSP00000322419 | ENSP00000378160 |
| ENSP00000322419 | ENSP00000379607 |

|                 |                 |
|-----------------|-----------------|
| ENSP00000322419 | ENSP00000380156 |
| ENSP00000322419 | ENSP00000384048 |
| ENSP00000322419 | ENSP00000386717 |
| ENSP00000322419 | ENSP00000389103 |
| ENSP00000322419 | ENSP00000389934 |
| ENSP00000322419 | ENSP00000393393 |
| ENSP00000322419 | ENSP00000410758 |
| ENSP00000322419 | ENSP00000414321 |
| ENSP00000322419 | ENSP00000419740 |
| ENSP00000322450 | ENSP00000327268 |
| ENSP00000322450 | ENSP00000356972 |
| ENSP00000322450 | ENSP00000381031 |
| ENSP00000322457 | ENSP00000323050 |
| ENSP00000322457 | ENSP00000326581 |
| ENSP00000322457 | ENSP00000335304 |
| ENSP00000322457 | ENSP00000337736 |
| ENSP00000322457 | ENSP00000338345 |
| ENSP00000322457 | ENSP00000343785 |
| ENSP00000322457 | ENSP00000348551 |
| ENSP00000322457 | ENSP00000351113 |
| ENSP00000322457 | ENSP00000353622 |
| ENSP00000322457 | ENSP00000355601 |
| ENSP00000322457 | ENSP00000356652 |
| ENSP00000322457 | ENSP00000357484 |
| ENSP00000322457 | ENSP00000359489 |
| ENSP00000322457 | ENSP00000367797 |
| ENSP00000322457 | ENSP00000381863 |
| ENSP00000322457 | ENSP00000386165 |
| ENSP00000322457 | ENSP00000386759 |
| ENSP00000322457 | ENSP00000391944 |
| ENSP00000322457 | ENSP00000404464 |
| ENSP00000322457 | ENSP00000408994 |
| ENSP00000322457 | ENSP00000417587 |
| ENSP00000322457 | ENSP00000419851 |
| ENSP00000322524 | ENSP00000386394 |
| ENSP00000322532 | ENSP00000358335 |
| ENSP00000322532 | ENSP00000358997 |
| ENSP00000322532 | ENSP00000366030 |
| ENSP00000322532 | ENSP00000387019 |
| ENSP00000322570 | ENSP00000325863 |
| ENSP00000322570 | ENSP00000329466 |
| ENSP00000322570 | ENSP00000334474 |
| ENSP00000322570 | ENSP00000335357 |
| ENSP00000322570 | ENSP00000340281 |
| ENSP00000322570 | ENSP00000340305 |
| ENSP00000322570 | ENSP00000340879 |

|                 |                 |
|-----------------|-----------------|
| ENSP00000322570 | ENSP00000341243 |
| ENSP00000322570 | ENSP00000343392 |
| ENSP00000322570 | ENSP00000343741 |
| ENSP00000322570 | ENSP00000343745 |
| ENSP00000322570 | ENSP00000347978 |
| ENSP00000322570 | ENSP00000348020 |
| ENSP00000322570 | ENSP00000349393 |
| ENSP00000322570 | ENSP00000350491 |
| ENSP00000322570 | ENSP00000351284 |
| ENSP00000322570 | ENSP00000351697 |
| ENSP00000322570 | ENSP00000352257 |
| ENSP00000322570 | ENSP00000353793 |
| ENSP00000322570 | ENSP00000354723 |
| ENSP00000322570 | ENSP00000354916 |
| ENSP00000322570 | ENSP00000358563 |
| ENSP00000322570 | ENSP00000359818 |
| ENSP00000322570 | ENSP00000360216 |
| ENSP00000322570 | ENSP00000361310 |
| ENSP00000322570 | ENSP00000362824 |
| ENSP00000322570 | ENSP00000364126 |
| ENSP00000322570 | ENSP00000364270 |
| ENSP00000322570 | ENSP00000364482 |
| ENSP00000322570 | ENSP00000367527 |
| ENSP00000322570 | ENSP00000367787 |
| ENSP00000322570 | ENSP00000368349 |
| ENSP00000322570 | ENSP00000368438 |
| ENSP00000322570 | ENSP00000369075 |
| ENSP00000322570 | ENSP00000369335 |
| ENSP00000322570 | ENSP00000370151 |
| ENSP00000322570 | ENSP00000370376 |
| ENSP00000322570 | ENSP00000371475 |
| ENSP00000322570 | ENSP00000372023 |
| ENSP00000322570 | ENSP00000372316 |
| ENSP00000322570 | ENSP00000372817 |
| ENSP00000322570 | ENSP00000375809 |
| ENSP00000322570 | ENSP00000377914 |
| ENSP00000322570 | ENSP00000380504 |
| ENSP00000322570 | ENSP00000381657 |
| ENSP00000322570 | ENSP00000391798 |
| ENSP00000322570 | ENSP00000394649 |
| ENSP00000322570 | ENSP00000401018 |
| ENSP00000322570 | ENSP00000401371 |
| ENSP00000322570 | ENSP00000402515 |
| ENSP00000322570 | ENSP00000406490 |
| ENSP00000322570 | ENSP00000406868 |
| ENSP00000322570 | ENSP00000407047 |

|                 |                 |
|-----------------|-----------------|
| ENSP00000322570 | ENSP00000407401 |
| ENSP00000322570 | ENSP00000417281 |
| ENSP00000322579 | ENSP00000336842 |
| ENSP00000322579 | ENSP00000348551 |
| ENSP00000322579 | ENSP00000353622 |
| ENSP00000322579 | ENSP00000356405 |
| ENSP00000322579 | ENSP00000357887 |
| ENSP00000322579 | ENSP00000360515 |
| ENSP00000322579 | ENSP00000364929 |
| ENSP00000322579 | ENSP00000369695 |
| ENSP00000322579 | ENSP00000374213 |
| ENSP00000322579 | ENSP00000386759 |
| ENSP00000322579 | ENSP00000397259 |
| ENSP00000322608 | ENSP00000326699 |
| ENSP00000322608 | ENSP00000329140 |
| ENSP00000322608 | ENSP00000329219 |
| ENSP00000322608 | ENSP00000333950 |
| ENSP00000322608 | ENSP00000337513 |
| ENSP00000322608 | ENSP00000349748 |
| ENSP00000322608 | ENSP00000352802 |
| ENSP00000322608 | ENSP00000354251 |
| ENSP00000322608 | ENSP00000354916 |
| ENSP00000322608 | ENSP00000355231 |
| ENSP00000322608 | ENSP00000356104 |
| ENSP00000322608 | ENSP00000365891 |
| ENSP00000322608 | ENSP00000366607 |
| ENSP00000322608 | ENSP00000376410 |
| ENSP00000322608 | ENSP00000381565 |
| ENSP00000322608 | ENSP00000383719 |
| ENSP00000322608 | ENSP00000390948 |
| ENSP00000322608 | ENSP00000391249 |
| ENSP00000322608 | ENSP00000397351 |
| ENSP00000322608 | ENSP00000397598 |
| ENSP00000322608 | ENSP00000407879 |
| ENSP00000322706 | ENSP00000325136 |
| ENSP00000322706 | ENSP00000330343 |
| ENSP00000322706 | ENSP00000331310 |
| ENSP00000322706 | ENSP00000332721 |
| ENSP00000322706 | ENSP00000340019 |
| ENSP00000322706 | ENSP00000342032 |
| ENSP00000322706 | ENSP00000348784 |
| ENSP00000322706 | ENSP00000349078 |
| ENSP00000322706 | ENSP00000358033 |
| ENSP00000322706 | ENSP00000359688 |
| ENSP00000322706 | ENSP00000360569 |
| ENSP00000322706 | ENSP00000365388 |

|                 |                 |
|-----------------|-----------------|
| ENSP00000322706 | ENSP00000368439 |
| ENSP00000322706 | ENSP00000368699 |
| ENSP00000322706 | ENSP00000371888 |
| ENSP00000322706 | ENSP00000379568 |
| ENSP00000322706 | ENSP00000379908 |
| ENSP00000322706 | ENSP00000386722 |
| ENSP00000322706 | ENSP00000388320 |
| ENSP00000322706 | ENSP00000394085 |
| ENSP00000322716 | ENSP00000329466 |
| ENSP00000322775 | ENSP00000357880 |
| ENSP00000322775 | ENSP00000371294 |
| ENSP00000322804 | ENSP00000347184 |
| ENSP00000322832 | ENSP00000355596 |
| ENSP00000322885 | ENSP00000332208 |
| ENSP00000322915 | ENSP00000323288 |
| ENSP00000322915 | ENSP00000324020 |
| ENSP00000322915 | ENSP00000336587 |
| ENSP00000322915 | ENSP00000362578 |
| ENSP00000322915 | ENSP00000384490 |
| ENSP00000322957 | ENSP00000327704 |
| ENSP00000322957 | ENSP00000333950 |
| ENSP00000322957 | ENSP00000334188 |
| ENSP00000322957 | ENSP00000336606 |
| ENSP00000322957 | ENSP00000343392 |
| ENSP00000322957 | ENSP00000350967 |
| ENSP00000322957 | ENSP00000351885 |
| ENSP00000322957 | ENSP00000353622 |
| ENSP00000322957 | ENSP00000353793 |
| ENSP00000322957 | ENSP00000354916 |
| ENSP00000322957 | ENSP00000354927 |
| ENSP00000322957 | ENSP00000357711 |
| ENSP00000322957 | ENSP00000359291 |
| ENSP00000322957 | ENSP00000360798 |
| ENSP00000322957 | ENSP00000361009 |
| ENSP00000322957 | ENSP00000365005 |
| ENSP00000322957 | ENSP00000366121 |
| ENSP00000322957 | ENSP00000375986 |
| ENSP00000322957 | ENSP00000376268 |
| ENSP00000322957 | ENSP00000376410 |
| ENSP00000322957 | ENSP00000377640 |
| ENSP00000322957 | ENSP00000384048 |
| ENSP00000322957 | ENSP00000388320 |
| ENSP00000322957 | ENSP00000391249 |
| ENSP00000322957 | ENSP00000397351 |
| ENSP00000322957 | ENSP00000402084 |
| ENSP00000322957 | ENSP00000412922 |

|                 |                 |
|-----------------|-----------------|
| ENSP00000322957 | ENSP00000417963 |
| ENSP00000322991 | ENSP00000336927 |
| ENSP00000322991 | ENSP00000340019 |
| ENSP00000322991 | ENSP00000342136 |
| ENSP00000322991 | ENSP00000349577 |
| ENSP00000322991 | ENSP00000356405 |
| ENSP00000322991 | ENSP00000359976 |
| ENSP00000323046 | ENSP00000330408 |
| ENSP00000323046 | ENSP00000343701 |
| ENSP00000323046 | ENSP00000348107 |
| ENSP00000323046 | ENSP00000348965 |
| ENSP00000323046 | ENSP00000356146 |
| ENSP00000323046 | ENSP00000356811 |
| ENSP00000323046 | ENSP00000359939 |
| ENSP00000323046 | ENSP00000360782 |
| ENSP00000323046 | ENSP00000361433 |
| ENSP00000323046 | ENSP00000365811 |
| ENSP00000323046 | ENSP00000366135 |
| ENSP00000323046 | ENSP00000368984 |
| ENSP00000323046 | ENSP00000379607 |
| ENSP00000323046 | ENSP00000381216 |
| ENSP00000323046 | ENSP00000398597 |
| ENSP00000323050 | ENSP00000325863 |
| ENSP00000323050 | ENSP00000350283 |
| ENSP00000323050 | ENSP00000364912 |
| ENSP00000323050 | ENSP00000366434 |
| ENSP00000323050 | ENSP00000368438 |
| ENSP00000323050 | ENSP00000384179 |
| ENSP00000323050 | ENSP00000413520 |
| ENSP00000323050 | ENSP00000416387 |
| ENSP00000323065 | ENSP00000360025 |
| ENSP00000323065 | ENSP00000365025 |
| ENSP00000323074 | ENSP00000329466 |
| ENSP00000323074 | ENSP00000334061 |
| ENSP00000323074 | ENSP00000340671 |
| ENSP00000323074 | ENSP00000376204 |
| ENSP00000323076 | ENSP00000356972 |
| ENSP00000323076 | ENSP00000358272 |
| ENSP00000323087 | ENSP00000336702 |
| ENSP00000323087 | ENSP00000347134 |
| ENSP00000323087 | ENSP00000359552 |
| ENSP00000323087 | ENSP00000370719 |
| ENSP00000323099 | ENSP00000343741 |
| ENSP00000323099 | ENSP00000375863 |
| ENSP00000323184 | ENSP00000357907 |
| ENSP00000323184 | ENSP00000380702 |



|                 |                 |
|-----------------|-----------------|
| ENSP00000323246 | ENSP00000360828 |
| ENSP00000323264 | ENSP00000352673 |
| ENSP00000323275 | ENSP00000349785 |
| ENSP00000323280 | ENSP00000342681 |
| ENSP00000323288 | ENSP00000336587 |
| ENSP00000323288 | ENSP00000350094 |
| ENSP00000323288 | ENSP00000355890 |
| ENSP00000323288 | ENSP00000362578 |
| ENSP00000323300 | ENSP00000328103 |
| ENSP00000323300 | ENSP00000354850 |
| ENSP00000323300 | ENSP00000357674 |
| ENSP00000323300 | ENSP00000386165 |
| ENSP00000323302 | ENSP00000331817 |
| ENSP00000323302 | ENSP00000332103 |
| ENSP00000323302 | ENSP00000335321 |
| ENSP00000323302 | ENSP00000342374 |
| ENSP00000323302 | ENSP00000348010 |
| ENSP00000323302 | ENSP00000361577 |
| ENSP00000323302 | ENSP00000362110 |
| ENSP00000323302 | ENSP00000374213 |
| ENSP00000323302 | ENSP00000377262 |
| ENSP00000323302 | ENSP00000380460 |
| ENSP00000323302 | ENSP00000384109 |
| ENSP00000323302 | ENSP00000400591 |
| ENSP00000323302 | ENSP00000410758 |
| ENSP00000323302 | ENSP00000412566 |
| ENSP00000323313 | ENSP00000335321 |
| ENSP00000323313 | ENSP00000410833 |
| ENSP00000323377 | ENSP00000326514 |
| ENSP00000323377 | ENSP00000327650 |
| ENSP00000323377 | ENSP00000333657 |
| ENSP00000323377 | ENSP00000334100 |
| ENSP00000323377 | ENSP00000348215 |
| ENSP00000323377 | ENSP00000348602 |
| ENSP00000323377 | ENSP00000351137 |
| ENSP00000323377 | ENSP00000353564 |
| ENSP00000323377 | ENSP00000354519 |
| ENSP00000323377 | ENSP00000354681 |
| ENSP00000323377 | ENSP00000354791 |
| ENSP00000323377 | ENSP00000355721 |
| ENSP00000323377 | ENSP00000359552 |
| ENSP00000323377 | ENSP00000360183 |
| ENSP00000323377 | ENSP00000362399 |
| ENSP00000323377 | ENSP00000366557 |
| ENSP00000323377 | ENSP00000373399 |
| ENSP00000323377 | ENSP00000381293 |

|                 |                 |
|-----------------|-----------------|
| ENSP00000323377 | ENSP00000382177 |
| ENSP00000323377 | ENSP00000389934 |
| ENSP00000323377 | ENSP00000390783 |
| ENSP00000323377 | ENSP00000393596 |
| ENSP00000323377 | ENSP00000394071 |
| ENSP00000323377 | ENSP00000401445 |
| ENSP00000323424 | ENSP00000326806 |
| ENSP00000323424 | ENSP00000339145 |
| ENSP00000323424 | ENSP00000346120 |
| ENSP00000323424 | ENSP00000358812 |
| ENSP00000323424 | ENSP00000368438 |
| ENSP00000323424 | ENSP00000370589 |
| ENSP00000323424 | ENSP00000374390 |
| ENSP00000323435 | ENSP00000350249 |
| ENSP00000323435 | ENSP00000356404 |
| ENSP00000323439 | ENSP00000324792 |
| ENSP00000323439 | ENSP00000328940 |
| ENSP00000323439 | ENSP00000330343 |
| ENSP00000323439 | ENSP00000334474 |
| ENSP00000323439 | ENSP00000340019 |
| ENSP00000323439 | ENSP00000340305 |
| ENSP00000323439 | ENSP00000340879 |
| ENSP00000323439 | ENSP00000343392 |
| ENSP00000323439 | ENSP00000343741 |
| ENSP00000323439 | ENSP00000343745 |
| ENSP00000323439 | ENSP00000346566 |
| ENSP00000323439 | ENSP00000347232 |
| ENSP00000323439 | ENSP00000347978 |
| ENSP00000323439 | ENSP00000349393 |
| ENSP00000323439 | ENSP00000351284 |
| ENSP00000323439 | ENSP00000351682 |
| ENSP00000323439 | ENSP00000352257 |
| ENSP00000323439 | ENSP00000354957 |
| ENSP00000323439 | ENSP00000355077 |
| ENSP00000323439 | ENSP00000355518 |
| ENSP00000323439 | ENSP00000358019 |
| ENSP00000323439 | ENSP00000358478 |
| ENSP00000323439 | ENSP00000364126 |
| ENSP00000323439 | ENSP00000364270 |
| ENSP00000323439 | ENSP00000364293 |
| ENSP00000323439 | ENSP00000365588 |
| ENSP00000323439 | ENSP00000369335 |
| ENSP00000323439 | ENSP00000370151 |
| ENSP00000323439 | ENSP00000371475 |
| ENSP00000323439 | ENSP00000372023 |
| ENSP00000323439 | ENSP00000373060 |

|                 |                 |
|-----------------|-----------------|
| ENSP00000323439 | ENSP00000373700 |
| ENSP00000323439 | ENSP00000384048 |
| ENSP00000323439 | ENSP00000387429 |
| ENSP00000323439 | ENSP00000396484 |
| ENSP00000323439 | ENSP00000396704 |
| ENSP00000323439 | ENSP00000402527 |
| ENSP00000323439 | ENSP00000404318 |
| ENSP00000323439 | ENSP00000409167 |
| ENSP00000323439 | ENSP00000415212 |
| ENSP00000323439 | ENSP00000416511 |
| ENSP00000323511 | ENSP00000337353 |
| ENSP00000323511 | ENSP00000342011 |
| ENSP00000323511 | ENSP00000349022 |
| ENSP00000323511 | ENSP00000349393 |
| ENSP00000323511 | ENSP00000351284 |
| ENSP00000323511 | ENSP00000352257 |
| ENSP00000323511 | ENSP00000352272 |
| ENSP00000323511 | ENSP00000354522 |
| ENSP00000323511 | ENSP00000358716 |
| ENSP00000323511 | ENSP00000363944 |
| ENSP00000323511 | ENSP00000364126 |
| ENSP00000323511 | ENSP00000365588 |
| ENSP00000323511 | ENSP00000367787 |
| ENSP00000323511 | ENSP00000371475 |
| ENSP00000323511 | ENSP00000373060 |
| ENSP00000323511 | ENSP00000384048 |
| ENSP00000323511 | ENSP00000387429 |
| ENSP00000323511 | ENSP00000388658 |
| ENSP00000323511 | ENSP00000396484 |
| ENSP00000323511 | ENSP00000400806 |
| ENSP00000323511 | ENSP00000404318 |
| ENSP00000323511 | ENSP00000409167 |
| ENSP00000323511 | ENSP00000415212 |
| ENSP00000323511 | ENSP00000416511 |
| ENSP00000323516 | ENSP00000340526 |
| ENSP00000323580 | ENSP00000341652 |
| ENSP00000323580 | ENSP00000358605 |
| ENSP00000323580 | ENSP00000365175 |
| ENSP00000323580 | ENSP00000367766 |
| ENSP00000323580 | ENSP00000387477 |
| ENSP00000323580 | ENSP00000415363 |
| ENSP00000323635 | ENSP00000352408 |
| ENSP00000323663 | ENSP00000339109 |
| ENSP00000323663 | ENSP00000343741 |
| ENSP00000323663 | ENSP00000351284 |
| ENSP00000323663 | ENSP00000368349 |

|                 |                 |
|-----------------|-----------------|
| ENSP00000323663 | ENSP00000368438 |
| ENSP00000323663 | ENSP00000368686 |
| ENSP00000323663 | ENSP00000369335 |
| ENSP00000323663 | ENSP00000380504 |
| ENSP00000323663 | ENSP00000413632 |
| ENSP00000323687 | ENSP00000329466 |
| ENSP00000323687 | ENSP00000339095 |
| ENSP00000323687 | ENSP00000343479 |
| ENSP00000323687 | ENSP00000354739 |
| ENSP00000323687 | ENSP00000356562 |
| ENSP00000323687 | ENSP00000369816 |
| ENSP00000323687 | ENSP00000384490 |
| ENSP00000323687 | ENSP00000417132 |
| ENSP00000323720 | ENSP00000325612 |
| ENSP00000323720 | ENSP00000326128 |
| ENSP00000323720 | ENSP00000326767 |
| ENSP00000323720 | ENSP00000329029 |
| ENSP00000323720 | ENSP00000334675 |
| ENSP00000323720 | ENSP00000335044 |
| ENSP00000323720 | ENSP00000337340 |
| ENSP00000323720 | ENSP00000337463 |
| ENSP00000323720 | ENSP00000347168 |
| ENSP00000323720 | ENSP00000347345 |
| ENSP00000323720 | ENSP00000347602 |
| ENSP00000323720 | ENSP00000347733 |
| ENSP00000323720 | ENSP00000348069 |
| ENSP00000323720 | ENSP00000348610 |
| ENSP00000323720 | ENSP00000350078 |
| ENSP00000323720 | ENSP00000350767 |
| ENSP00000323720 | ENSP00000351947 |
| ENSP00000323720 | ENSP00000354951 |
| ENSP00000323720 | ENSP00000355759 |
| ENSP00000323720 | ENSP00000357047 |
| ENSP00000323720 | ENSP00000357051 |
| ENSP00000323720 | ENSP00000357907 |
| ENSP00000323720 | ENSP00000359531 |
| ENSP00000323720 | ENSP00000360371 |
| ENSP00000323720 | ENSP00000361465 |
| ENSP00000323720 | ENSP00000362441 |
| ENSP00000323720 | ENSP00000362948 |
| ENSP00000323720 | ENSP00000363193 |
| ENSP00000323720 | ENSP00000363985 |
| ENSP00000323720 | ENSP00000366974 |
| ENSP00000323720 | ENSP00000367034 |
| ENSP00000323720 | ENSP00000369695 |
| ENSP00000323720 | ENSP00000374529 |

|                 |                 |
|-----------------|-----------------|
| ENSP00000323720 | ENSP00000381216 |
| ENSP00000323720 | ENSP00000382723 |
| ENSP00000323720 | ENSP00000384048 |
| ENSP00000323720 | ENSP00000384651 |
| ENSP00000323720 | ENSP00000386520 |
| ENSP00000323720 | ENSP00000389516 |
| ENSP00000323720 | ENSP00000391774 |
| ENSP00000323720 | ENSP00000392617 |
| ENSP00000323720 | ENSP00000395863 |
| ENSP00000323720 | ENSP00000401287 |
| ENSP00000323720 | ENSP00000402537 |
| ENSP00000323720 | ENSP00000403852 |
| ENSP00000323720 | ENSP00000405864 |
| ENSP00000323720 | ENSP00000412805 |
| ENSP00000323720 | ENSP00000418734 |
| ENSP00000323780 | ENSP00000345988 |
| ENSP00000323780 | ENSP00000361064 |
| ENSP00000323780 | ENSP00000364486 |
| ENSP00000323780 | ENSP00000380129 |
| ENSP00000323780 | ENSP00000409275 |
| ENSP00000323822 | ENSP00000334061 |
| ENSP00000323822 | ENSP00000334808 |
| ENSP00000323822 | ENSP00000350512 |
| ENSP00000323822 | ENSP00000354340 |
| ENSP00000323822 | ENSP00000386121 |
| ENSP00000323822 | ENSP00000394071 |
| ENSP00000323856 | ENSP00000326981 |
| ENSP00000323856 | ENSP00000329466 |
| ENSP00000323856 | ENSP00000331019 |
| ENSP00000323856 | ENSP00000339095 |
| ENSP00000323856 | ENSP00000340937 |
| ENSP00000323856 | ENSP00000341885 |
| ENSP00000323856 | ENSP00000346050 |
| ENSP00000323856 | ENSP00000346067 |
| ENSP00000323856 | ENSP00000353508 |
| ENSP00000323856 | ENSP00000353741 |
| ENSP00000323856 | ENSP00000354125 |
| ENSP00000323856 | ENSP00000354739 |
| ENSP00000323856 | ENSP00000355231 |
| ENSP00000323856 | ENSP00000359345 |
| ENSP00000323856 | ENSP00000360532 |
| ENSP00000323856 | ENSP00000361076 |
| ENSP00000323856 | ENSP00000361824 |
| ENSP00000323856 | ENSP00000362744 |
| ENSP00000323856 | ENSP00000364320 |
| ENSP00000323856 | ENSP00000369757 |

|                 |                 |
|-----------------|-----------------|
| ENSP00000323856 | ENSP00000370571 |
| ENSP00000323856 | ENSP00000373600 |
| ENSP00000323856 | ENSP00000374455 |
| ENSP00000323856 | ENSP00000379339 |
| ENSP00000323856 | ENSP00000379607 |
| ENSP00000323856 | ENSP00000379888 |
| ENSP00000323856 | ENSP00000393241 |
| ENSP00000323856 | ENSP00000397435 |
| ENSP00000323856 | ENSP00000403175 |
| ENSP00000323856 | ENSP00000412583 |
| ENSP00000323856 | ENSP00000414321 |
| ENSP00000323856 | ENSP00000416110 |
| ENSP00000323856 | ENSP00000420714 |
| ENSP00000323858 | ENSP00000325120 |
| ENSP00000323858 | ENSP00000328690 |
| ENSP00000323858 | ENSP00000329466 |
| ENSP00000323858 | ENSP00000330945 |
| ENSP00000323858 | ENSP00000332340 |
| ENSP00000323858 | ENSP00000338573 |
| ENSP00000323858 | ENSP00000338862 |
| ENSP00000323858 | ENSP00000339145 |
| ENSP00000323858 | ENSP00000339795 |
| ENSP00000323858 | ENSP00000340281 |
| ENSP00000323858 | ENSP00000342181 |
| ENSP00000323858 | ENSP00000342381 |
| ENSP00000323858 | ENSP00000343557 |
| ENSP00000323858 | ENSP00000345917 |
| ENSP00000323858 | ENSP00000346022 |
| ENSP00000323858 | ENSP00000346725 |
| ENSP00000323858 | ENSP00000353246 |
| ENSP00000323858 | ENSP00000354040 |
| ENSP00000323858 | ENSP00000355890 |
| ENSP00000323858 | ENSP00000356548 |
| ENSP00000323858 | ENSP00000358400 |
| ENSP00000323858 | ENSP00000358563 |
| ENSP00000323858 | ENSP00000358812 |
| ENSP00000323858 | ENSP00000359345 |
| ENSP00000323858 | ENSP00000359688 |
| ENSP00000323858 | ENSP00000360412 |
| ENSP00000323858 | ENSP00000360828 |
| ENSP00000323858 | ENSP00000361076 |
| ENSP00000323858 | ENSP00000361465 |
| ENSP00000323858 | ENSP00000361699 |
| ENSP00000323858 | ENSP00000362110 |
| ENSP00000323858 | ENSP00000363559 |
| ENSP00000323858 | ENSP00000364320 |

|                 |                 |
|-----------------|-----------------|
| ENSP00000323858 | ENSP00000364543 |
| ENSP00000323858 | ENSP00000366135 |
| ENSP00000323858 | ENSP00000366519 |
| ENSP00000323858 | ENSP00000369736 |
| ENSP00000323858 | ENSP00000370589 |
| ENSP00000323858 | ENSP00000370968 |
| ENSP00000323858 | ENSP00000371101 |
| ENSP00000323858 | ENSP00000372827 |
| ENSP00000323858 | ENSP00000378160 |
| ENSP00000323858 | ENSP00000380982 |
| ENSP00000323858 | ENSP00000382392 |
| ENSP00000323858 | ENSP00000384048 |
| ENSP00000323858 | ENSP00000385903 |
| ENSP00000323858 | ENSP00000389103 |
| ENSP00000323858 | ENSP00000393393 |
| ENSP00000323858 | ENSP00000394400 |
| ENSP00000323858 | ENSP00000399530 |
| ENSP00000323858 | ENSP00000400626 |
| ENSP00000323858 | ENSP00000402338 |
| ENSP00000323858 | ENSP00000412310 |
| ENSP00000323913 | ENSP00000343479 |
| ENSP00000323913 | ENSP00000368686 |
| ENSP00000323913 | ENSP00000374455 |
| ENSP00000323967 | ENSP00000325120 |
| ENSP00000323967 | ENSP00000325690 |
| ENSP00000323967 | ENSP00000334130 |
| ENSP00000323967 | ENSP00000335044 |
| ENSP00000323967 | ENSP00000341805 |
| ENSP00000323967 | ENSP00000342434 |
| ENSP00000323967 | ENSP00000342755 |
| ENSP00000323967 | ENSP00000349213 |
| ENSP00000323967 | ENSP00000351250 |
| ENSP00000323967 | ENSP00000351947 |
| ENSP00000323967 | ENSP00000352514 |
| ENSP00000323967 | ENSP00000353344 |
| ENSP00000323967 | ENSP00000353622 |
| ENSP00000323967 | ENSP00000355596 |
| ENSP00000323967 | ENSP00000360532 |
| ENSP00000323967 | ENSP00000378180 |
| ENSP00000323967 | ENSP00000379607 |
| ENSP00000323967 | ENSP00000384474 |
| ENSP00000323967 | ENSP00000385903 |
| ENSP00000323967 | ENSP00000392028 |
| ENSP00000323967 | ENSP00000392617 |
| ENSP00000323967 | ENSP00000395535 |
| ENSP00000323967 | ENSP00000399511 |

|                 |                 |
|-----------------|-----------------|
| ENSP00000323967 | ENSP00000399968 |
| ENSP00000323967 | ENSP00000417281 |
| ENSP00000323967 | ENSP00000417763 |
| ENSP00000324020 | ENSP00000336587 |
| ENSP00000324020 | ENSP00000346566 |
| ENSP00000324020 | ENSP00000348577 |
| ENSP00000324020 | ENSP00000357643 |
| ENSP00000324100 | ENSP00000371888 |
| ENSP00000324122 | ENSP00000328854 |
| ENSP00000324122 | ENSP00000331019 |
| ENSP00000324122 | ENSP00000332103 |
| ENSP00000324122 | ENSP00000333401 |
| ENSP00000324122 | ENSP00000335321 |
| ENSP00000324122 | ENSP00000336712 |
| ENSP00000324122 | ENSP00000339095 |
| ENSP00000324122 | ENSP00000341885 |
| ENSP00000324122 | ENSP00000342181 |
| ENSP00000324122 | ENSP00000342374 |
| ENSP00000324122 | ENSP00000343701 |
| ENSP00000324122 | ENSP00000344393 |
| ENSP00000324122 | ENSP00000345096 |
| ENSP00000324122 | ENSP00000346725 |
| ENSP00000324122 | ENSP00000348010 |
| ENSP00000324122 | ENSP00000354040 |
| ENSP00000324122 | ENSP00000355050 |
| ENSP00000324122 | ENSP00000355541 |
| ENSP00000324122 | ENSP00000358563 |
| ENSP00000324122 | ENSP00000358812 |
| ENSP00000324122 | ENSP00000359454 |
| ENSP00000324122 | ENSP00000359688 |
| ENSP00000324122 | ENSP00000360031 |
| ENSP00000324122 | ENSP00000360412 |
| ENSP00000324122 | ENSP00000361465 |
| ENSP00000324122 | ENSP00000361577 |
| ENSP00000324122 | ENSP00000361982 |
| ENSP00000324122 | ENSP00000362105 |
| ENSP00000324122 | ENSP00000362110 |
| ENSP00000324122 | ENSP00000363313 |
| ENSP00000324122 | ENSP00000363559 |
| ENSP00000324122 | ENSP00000363642 |
| ENSP00000324122 | ENSP00000363746 |
| ENSP00000324122 | ENSP00000364289 |
| ENSP00000324122 | ENSP00000364813 |
| ENSP00000324122 | ENSP00000365837 |
| ENSP00000324122 | ENSP00000366519 |
| ENSP00000324122 | ENSP00000366557 |



|                 |                 |
|-----------------|-----------------|
| ENSP00000324122 | ENSP00000367029 |
| ENSP00000324122 | ENSP00000367079 |
| ENSP00000324122 | ENSP00000371101 |
| ENSP00000324122 | ENSP00000371169 |
| ENSP00000324122 | ENSP00000371201 |
| ENSP00000324122 | ENSP00000372695 |
| ENSP00000324122 | ENSP00000372883 |
| ENSP00000324122 | ENSP00000373952 |
| ENSP00000324122 | ENSP00000377486 |
| ENSP00000324122 | ENSP00000377865 |
| ENSP00000324122 | ENSP00000377944 |
| ENSP00000324122 | ENSP00000378529 |
| ENSP00000324122 | ENSP00000380982 |
| ENSP00000324122 | ENSP00000382392 |
| ENSP00000324122 | ENSP00000384302 |
| ENSP00000324122 | ENSP00000386134 |
| ENSP00000324122 | ENSP00000388464 |
| ENSP00000324122 | ENSP00000396704 |
| ENSP00000324122 | ENSP00000399454 |
| ENSP00000324122 | ENSP00000400591 |
| ENSP00000324122 | ENSP00000402338 |
| ENSP00000324122 | ENSP00000402869 |
| ENSP00000324122 | ENSP00000403345 |
| ENSP00000324122 | ENSP00000405614 |
| ENSP00000324122 | ENSP00000406280 |
| ENSP00000324122 | ENSP00000412566 |
| ENSP00000324122 | ENSP00000414006 |
| ENSP00000324122 | ENSP00000414634 |
| ENSP00000324122 | ENSP00000416959 |
| ENSP00000324122 | ENSP00000417602 |
| ENSP00000324122 | ENSP00000419740 |
| ENSP00000324124 | ENSP00000327889 |
| ENSP00000324124 | ENSP00000329029 |
| ENSP00000324124 | ENSP00000331111 |
| ENSP00000324124 | ENSP00000334564 |
| ENSP00000324124 | ENSP00000335261 |
| ENSP00000324124 | ENSP00000335357 |
| ENSP00000324124 | ENSP00000337340 |
| ENSP00000324124 | ENSP00000340823 |
| ENSP00000324124 | ENSP00000341243 |
| ENSP00000324124 | ENSP00000342121 |
| ENSP00000324124 | ENSP00000342889 |
| ENSP00000324124 | ENSP00000343741 |
| ENSP00000324124 | ENSP00000347345 |
| ENSP00000324124 | ENSP00000351492 |
| ENSP00000324124 | ENSP00000354775 |

|                 |                 |
|-----------------|-----------------|
| ENSP00000324124 | ENSP00000354916 |
| ENSP00000324124 | ENSP00000359531 |
| ENSP00000324124 | ENSP00000361465 |
| ENSP00000324124 | ENSP00000366828 |
| ENSP00000324124 | ENSP00000367029 |
| ENSP00000324124 | ENSP00000371800 |
| ENSP00000324124 | ENSP00000372023 |
| ENSP00000324124 | ENSP00000377969 |
| ENSP00000324124 | ENSP00000378736 |
| ENSP00000324124 | ENSP00000383503 |
| ENSP00000324124 | ENSP00000397636 |
| ENSP00000324124 | ENSP00000403852 |
| ENSP00000324124 | ENSP00000405636 |
| ENSP00000324124 | ENSP00000406293 |
| ENSP00000324124 | ENSP00000410530 |
| ENSP00000324124 | ENSP00000410954 |
| ENSP00000324124 | ENSP00000414110 |
| ENSP00000324124 | ENSP00000416599 |
| ENSP00000324127 | ENSP00000350409 |
| ENSP00000324127 | ENSP00000388872 |
| ENSP00000324191 | ENSP00000374529 |
| ENSP00000324203 | ENSP00000326806 |
| ENSP00000324203 | ENSP00000358563 |
| ENSP00000324203 | ENSP00000358716 |
| ENSP00000324203 | ENSP00000362936 |
| ENSP00000324248 | ENSP00000337396 |
| ENSP00000324274 | ENSP00000337340 |
| ENSP00000324274 | ENSP00000342374 |
| ENSP00000324274 | ENSP00000355050 |
| ENSP00000324274 | ENSP00000360488 |
| ENSP00000324274 | ENSP00000383059 |
| ENSP00000324274 | ENSP00000396301 |
| ENSP00000324292 | ENSP00000343129 |
| ENSP00000324292 | ENSP00000347979 |
| ENSP00000324318 | ENSP00000404923 |
| ENSP00000324343 | ENSP00000357880 |
| ENSP00000324403 | ENSP00000342181 |
| ENSP00000324403 | ENSP00000360031 |
| ENSP00000324404 | ENSP00000340995 |
| ENSP00000324404 | ENSP00000356785 |
| ENSP00000324422 | ENSP00000346839 |
| ENSP00000324422 | ENSP00000347087 |
| ENSP00000324422 | ENSP00000355809 |
| ENSP00000324422 | ENSP00000380019 |
| ENSP00000324422 | ENSP00000381098 |
| ENSP00000324422 | ENSP00000384169 |

|                 |                 |
|-----------------|-----------------|
| ENSP00000324444 | ENSP00000329715 |
| ENSP00000324444 | ENSP00000336524 |
| ENSP00000324444 | ENSP00000340454 |
| ENSP00000324444 | ENSP00000341138 |
| ENSP00000324444 | ENSP00000353564 |
| ENSP00000324444 | ENSP00000356602 |
| ENSP00000324444 | ENSP00000359290 |
| ENSP00000324444 | ENSP00000359837 |
| ENSP00000324444 | ENSP00000361264 |
| ENSP00000324463 | ENSP00000329466 |
| ENSP00000324463 | ENSP00000333376 |
| ENSP00000324463 | ENSP00000343535 |
| ENSP00000324463 | ENSP00000360532 |
| ENSP00000324463 | ENSP00000362748 |
| ENSP00000324463 | ENSP00000369351 |
| ENSP00000324463 | ENSP00000376309 |
| ENSP00000324463 | ENSP00000379144 |
| ENSP00000324463 | ENSP00000379607 |
| ENSP00000324463 | ENSP00000381216 |
| ENSP00000324463 | ENSP00000391774 |
| ENSP00000324491 | ENSP00000379933 |
| ENSP00000324551 | ENSP00000360532 |
| ENSP00000324560 | ENSP00000328720 |
| ENSP00000324560 | ENSP00000334061 |
| ENSP00000324560 | ENSP00000341692 |
| ENSP00000324560 | ENSP00000344456 |
| ENSP00000324560 | ENSP00000347379 |
| ENSP00000324560 | ENSP00000349785 |
| ENSP00000324560 | ENSP00000353452 |
| ENSP00000324560 | ENSP00000355177 |
| ENSP00000324560 | ENSP00000355231 |
| ENSP00000324560 | ENSP00000356563 |
| ENSP00000324560 | ENSP00000360183 |
| ENSP00000324560 | ENSP00000368119 |
| ENSP00000324560 | ENSP00000378288 |
| ENSP00000324560 | ENSP00000385545 |
| ENSP00000324560 | ENSP00000396620 |
| ENSP00000324560 | ENSP00000403636 |
| ENSP00000324573 | ENSP00000325690 |
| ENSP00000324573 | ENSP00000328203 |
| ENSP00000324573 | ENSP00000335304 |
| ENSP00000324573 | ENSP00000338727 |
| ENSP00000324573 | ENSP00000375857 |
| ENSP00000324573 | ENSP00000381098 |
| ENSP00000324628 | ENSP00000327650 |
| ENSP00000324628 | ENSP00000360183 |

|                 |                 |
|-----------------|-----------------|
| ENSP00000324628 | ENSP00000362399 |
| ENSP00000324628 | ENSP00000366225 |
| ENSP00000324628 | ENSP00000381293 |
| ENSP00000324628 | ENSP00000390783 |
| ENSP00000324729 | ENSP00000340578 |
| ENSP00000324729 | ENSP00000344666 |
| ENSP00000324729 | ENSP00000374455 |
| ENSP00000324792 | ENSP00000325017 |
| ENSP00000324792 | ENSP00000326424 |
| ENSP00000324792 | ENSP00000332103 |
| ENSP00000324792 | ENSP00000333836 |
| ENSP00000324792 | ENSP00000334538 |
| ENSP00000324792 | ENSP00000339881 |
| ENSP00000324792 | ENSP00000345656 |
| ENSP00000324792 | ENSP00000360621 |
| ENSP00000324792 | ENSP00000360644 |
| ENSP00000324792 | ENSP00000364794 |
| ENSP00000324792 | ENSP00000367527 |
| ENSP00000324792 | ENSP00000369335 |
| ENSP00000324792 | ENSP00000375809 |
| ENSP00000324792 | ENSP00000377969 |
| ENSP00000324792 | ENSP00000384597 |
| ENSP00000324792 | ENSP00000387347 |
| ENSP00000324792 | ENSP00000396452 |
| ENSP00000324792 | ENSP00000403852 |
| ENSP00000324792 | ENSP00000412566 |
| ENSP00000324792 | ENSP00000414321 |
| ENSP00000324827 | ENSP00000359958 |
| ENSP00000324857 | ENSP00000355136 |
| ENSP00000324857 | ENSP00000356595 |
| ENSP00000324857 | ENSP00000370719 |
| ENSP00000324857 | ENSP00000377862 |
| ENSP00000324857 | ENSP00000380942 |
| ENSP00000324884 | ENSP00000350249 |
| ENSP00000324884 | ENSP00000368686 |
| ENSP00000324956 | ENSP00000329189 |
| ENSP00000324956 | ENSP00000340305 |
| ENSP00000324956 | ENSP00000342121 |
| ENSP00000324956 | ENSP00000353741 |
| ENSP00000324956 | ENSP00000356811 |
| ENSP00000324956 | ENSP00000360116 |
| ENSP00000324956 | ENSP00000365837 |
| ENSP00000325002 | ENSP00000325369 |
| ENSP00000325002 | ENSP00000327309 |
| ENSP00000325002 | ENSP00000329419 |
| ENSP00000325002 | ENSP00000329466 |

|                 |                 |
|-----------------|-----------------|
| ENSP00000325002 | ENSP00000330945 |
| ENSP00000325002 | ENSP00000334836 |
| ENSP00000325002 | ENSP00000338990 |
| ENSP00000325002 | ENSP00000345530 |
| ENSP00000325002 | ENSP00000346206 |
| ENSP00000325002 | ENSP00000346733 |
| ENSP00000325002 | ENSP00000349970 |
| ENSP00000325002 | ENSP00000350297 |
| ENSP00000325002 | ENSP00000357048 |
| ENSP00000325002 | ENSP00000359000 |
| ENSP00000325002 | ENSP00000359127 |
| ENSP00000325002 | ENSP00000360532 |
| ENSP00000325002 | ENSP00000360798 |
| ENSP00000325002 | ENSP00000362688 |
| ENSP00000325002 | ENSP00000364188 |
| ENSP00000325002 | ENSP00000364847 |
| ENSP00000325002 | ENSP00000371101 |
| ENSP00000325002 | ENSP00000377280 |
| ENSP00000325002 | ENSP00000378529 |
| ENSP00000325002 | ENSP00000378546 |
| ENSP00000325002 | ENSP00000379228 |
| ENSP00000325002 | ENSP00000386456 |
| ENSP00000325002 | ENSP00000390783 |
| ENSP00000325002 | ENSP00000395701 |
| ENSP00000325002 | ENSP00000397441 |
| ENSP00000325002 | ENSP00000397598 |
| ENSP00000325017 | ENSP00000329466 |
| ENSP00000325017 | ENSP00000330343 |
| ENSP00000325017 | ENSP00000341382 |
| ENSP00000325017 | ENSP00000351284 |
| ENSP00000325017 | ENSP00000353793 |
| ENSP00000325017 | ENSP00000354522 |
| ENSP00000325017 | ENSP00000355511 |
| ENSP00000325017 | ENSP00000355759 |
| ENSP00000325017 | ENSP00000360532 |
| ENSP00000325017 | ENSP00000362110 |
| ENSP00000325017 | ENSP00000368976 |
| ENSP00000325017 | ENSP00000377793 |
| ENSP00000325017 | ENSP00000394071 |
| ENSP00000325120 | ENSP00000329357 |
| ENSP00000325120 | ENSP00000341208 |
| ENSP00000325120 | ENSP00000341692 |
| ENSP00000325120 | ENSP00000348551 |
| ENSP00000325120 | ENSP00000350283 |
| ENSP00000325120 | ENSP00000352257 |
| ENSP00000325120 | ENSP00000355136 |

|                 |                 |
|-----------------|-----------------|
| ENSP00000325120 | ENSP00000358554 |
| ENSP00000325120 | ENSP00000358953 |
| ENSP00000325120 | ENSP00000364126 |
| ENSP00000325120 | ENSP00000364895 |
| ENSP00000325120 | ENSP00000368253 |
| ENSP00000325120 | ENSP00000376611 |
| ENSP00000325120 | ENSP00000381045 |
| ENSP00000325120 | ENSP00000399968 |
| ENSP00000325136 | ENSP00000338990 |
| ENSP00000325136 | ENSP00000349785 |
| ENSP00000325136 | ENSP00000370023 |
| ENSP00000325136 | ENSP00000374280 |
| ENSP00000325136 | ENSP00000374455 |
| ENSP00000325146 | ENSP00000379607 |
| ENSP00000325290 | ENSP00000359518 |
| ENSP00000325290 | ENSP00000374213 |
| ENSP00000325312 | ENSP00000338573 |
| ENSP00000325312 | ENSP00000339795 |
| ENSP00000325312 | ENSP00000341551 |
| ENSP00000325312 | ENSP00000346015 |
| ENSP00000325312 | ENSP00000346022 |
| ENSP00000325312 | ENSP00000346453 |
| ENSP00000325312 | ENSP00000346725 |
| ENSP00000325312 | ENSP00000348596 |
| ENSP00000325312 | ENSP00000354040 |
| ENSP00000325312 | ENSP00000358400 |
| ENSP00000325312 | ENSP00000359305 |
| ENSP00000325312 | ENSP00000359345 |
| ENSP00000325312 | ENSP00000360412 |
| ENSP00000325312 | ENSP00000361076 |
| ENSP00000325312 | ENSP00000362041 |
| ENSP00000325312 | ENSP00000362153 |
| ENSP00000325312 | ENSP00000363384 |
| ENSP00000325312 | ENSP00000363559 |
| ENSP00000325312 | ENSP00000364037 |
| ENSP00000325312 | ENSP00000368686 |
| ENSP00000325312 | ENSP00000370968 |
| ENSP00000325312 | ENSP00000377954 |
| ENSP00000325312 | ENSP00000379888 |
| ENSP00000325312 | ENSP00000386717 |
| ENSP00000325312 | ENSP00000389103 |
| ENSP00000325312 | ENSP00000402338 |
| ENSP00000325326 | ENSP00000334130 |
| ENSP00000325326 | ENSP00000340896 |
| ENSP00000325326 | ENSP00000351894 |
| ENSP00000325326 | ENSP00000417281 |

|                 |                 |
|-----------------|-----------------|
| ENSP00000325369 | ENSP00000328079 |
| ENSP00000325369 | ENSP00000329419 |
| ENSP00000325369 | ENSP00000344055 |
| ENSP00000325369 | ENSP00000346809 |
| ENSP00000325369 | ENSP00000350199 |
| ENSP00000325369 | ENSP00000351926 |
| ENSP00000325369 | ENSP00000352603 |
| ENSP00000325369 | ENSP00000353904 |
| ENSP00000325369 | ENSP00000356989 |
| ENSP00000325369 | ENSP00000357048 |
| ENSP00000325369 | ENSP00000365837 |
| ENSP00000325369 | ENSP00000377148 |
| ENSP00000325369 | ENSP00000377769 |
| ENSP00000325376 | ENSP00000326261 |
| ENSP00000325376 | ENSP00000326806 |
| ENSP00000325376 | ENSP00000329967 |
| ENSP00000325376 | ENSP00000331310 |
| ENSP00000325376 | ENSP00000331879 |
| ENSP00000325376 | ENSP00000334538 |
| ENSP00000325376 | ENSP00000336712 |
| ENSP00000325376 | ENSP00000337340 |
| ENSP00000325376 | ENSP00000337839 |
| ENSP00000325376 | ENSP00000338862 |
| ENSP00000325376 | ENSP00000340823 |
| ENSP00000325376 | ENSP00000341213 |
| ENSP00000325376 | ENSP00000344504 |
| ENSP00000325376 | ENSP00000345096 |
| ENSP00000325376 | ENSP00000346453 |
| ENSP00000325376 | ENSP00000351947 |
| ENSP00000325376 | ENSP00000352668 |
| ENSP00000325376 | ENSP00000353735 |
| ENSP00000325376 | ENSP00000359518 |
| ENSP00000325376 | ENSP00000359727 |
| ENSP00000325376 | ENSP00000359988 |
| ENSP00000325376 | ENSP00000360532 |
| ENSP00000325376 | ENSP00000361010 |
| ENSP00000325376 | ENSP00000361076 |
| ENSP00000325376 | ENSP00000362110 |
| ENSP00000325376 | ENSP00000362532 |
| ENSP00000325376 | ENSP00000362744 |
| ENSP00000325376 | ENSP00000363313 |
| ENSP00000325376 | ENSP00000364289 |
| ENSP00000325376 | ENSP00000365175 |
| ENSP00000325376 | ENSP00000365439 |
| ENSP00000325376 | ENSP00000366135 |
| ENSP00000325376 | ENSP00000369887 |

|                 |                 |
|-----------------|-----------------|
| ENSP00000325376 | ENSP00000370589 |
| ENSP00000325376 | ENSP00000374399 |
| ENSP00000325376 | ENSP00000374443 |
| ENSP00000325376 | ENSP00000377262 |
| ENSP00000325376 | ENSP00000378165 |
| ENSP00000325376 | ENSP00000379607 |
| ENSP00000325376 | ENSP00000379888 |
| ENSP00000325376 | ENSP00000381657 |
| ENSP00000325376 | ENSP00000382239 |
| ENSP00000325376 | ENSP00000387477 |
| ENSP00000325376 | ENSP00000401371 |
| ENSP00000325376 | ENSP00000415363 |
| ENSP00000325377 | ENSP00000331369 |
| ENSP00000325377 | ENSP00000332444 |
| ENSP00000325377 | ENSP00000336752 |
| ENSP00000325377 | ENSP00000339353 |
| ENSP00000325377 | ENSP00000351947 |
| ENSP00000325377 | ENSP00000360532 |
| ENSP00000325377 | ENSP00000386161 |
| ENSP00000325377 | ENSP00000391723 |
| ENSP00000325414 | ENSP00000363021 |
| ENSP00000325421 | ENSP00000333657 |
| ENSP00000325421 | ENSP00000354681 |
| ENSP00000325421 | ENSP00000357880 |
| ENSP00000325421 | ENSP00000371294 |
| ENSP00000325425 | ENSP00000341662 |
| ENSP00000325425 | ENSP00000348762 |
| ENSP00000325425 | ENSP00000354347 |
| ENSP00000325425 | ENSP00000360918 |
| ENSP00000325425 | ENSP00000367923 |
| ENSP00000325448 | ENSP00000329466 |
| ENSP00000325448 | ENSP00000331879 |
| ENSP00000325448 | ENSP00000340019 |
| ENSP00000325448 | ENSP00000342374 |
| ENSP00000325448 | ENSP00000344460 |
| ENSP00000325448 | ENSP00000346067 |
| ENSP00000325448 | ENSP00000350512 |
| ENSP00000325448 | ENSP00000353575 |
| ENSP00000325448 | ENSP00000354558 |
| ENSP00000325448 | ENSP00000355086 |
| ENSP00000325448 | ENSP00000355518 |
| ENSP00000325448 | ENSP00000355890 |
| ENSP00000325448 | ENSP00000360828 |
| ENSP00000325448 | ENSP00000362413 |
| ENSP00000325448 | ENSP00000363779 |
| ENSP00000325448 | ENSP00000365534 |



|                 |                 |
|-----------------|-----------------|
| ENSP00000325448 | ENSP00000367029 |
| ENSP00000325448 | ENSP00000369757 |
| ENSP00000325448 | ENSP00000374219 |
| ENSP00000325448 | ENSP00000376946 |
| ENSP00000325448 | ENSP00000379607 |
| ENSP00000325448 | ENSP00000379933 |
| ENSP00000325448 | ENSP00000380460 |
| ENSP00000325448 | ENSP00000382779 |
| ENSP00000325448 | ENSP00000391944 |
| ENSP00000325448 | ENSP00000394869 |
| ENSP00000325448 | ENSP00000397259 |
| ENSP00000325448 | ENSP00000400591 |
| ENSP00000325448 | ENSP00000401018 |
| ENSP00000325448 | ENSP00000402038 |
| ENSP00000325448 | ENSP00000410758 |
| ENSP00000325448 | ENSP00000412553 |
| ENSP00000325448 | ENSP00000412566 |
| ENSP00000325506 | ENSP00000334188 |
| ENSP00000325506 | ENSP00000342793 |
| ENSP00000325506 | ENSP00000346255 |
| ENSP00000325506 | ENSP00000359518 |
| ENSP00000325506 | ENSP00000360183 |
| ENSP00000325506 | ENSP00000360473 |
| ENSP00000325506 | ENSP00000368439 |
| ENSP00000325518 | ENSP00000350012 |
| ENSP00000325562 | ENSP00000331787 |
| ENSP00000325562 | ENSP00000337127 |
| ENSP00000325562 | ENSP00000340900 |
| ENSP00000325562 | ENSP00000345445 |
| ENSP00000325562 | ENSP00000355672 |
| ENSP00000325562 | ENSP00000357360 |
| ENSP00000325562 | ENSP00000357807 |
| ENSP00000325562 | ENSP00000360498 |
| ENSP00000325562 | ENSP00000361616 |
| ENSP00000325562 | ENSP00000366800 |
| ENSP00000325562 | ENSP00000368605 |
| ENSP00000325562 | ENSP00000372326 |
| ENSP00000325562 | ENSP00000377617 |
| ENSP00000325562 | ENSP00000387262 |
| ENSP00000325562 | ENSP00000394071 |
| ENSP00000325589 | ENSP00000356346 |
| ENSP00000325612 | ENSP00000326767 |
| ENSP00000325612 | ENSP00000336750 |
| ENSP00000325612 | ENSP00000337340 |
| ENSP00000325612 | ENSP00000347733 |
| ENSP00000325612 | ENSP00000354951 |

|                 |                 |
|-----------------|-----------------|
| ENSP00000325612 | ENSP00000357047 |
| ENSP00000325612 | ENSP00000357907 |
| ENSP00000325612 | ENSP00000360515 |
| ENSP00000325612 | ENSP00000360532 |
| ENSP00000325612 | ENSP00000362948 |
| ENSP00000325612 | ENSP00000363193 |
| ENSP00000325612 | ENSP00000369162 |
| ENSP00000325612 | ENSP00000384048 |
| ENSP00000325612 | ENSP00000391774 |
| ENSP00000325612 | ENSP00000392617 |
| ENSP00000325612 | ENSP00000418734 |
| ENSP00000325618 | ENSP00000348877 |
| ENSP00000325634 | ENSP00000400806 |
| ENSP00000325663 | ENSP00000352673 |
| ENSP00000325677 | ENSP00000325863 |
| ENSP00000325677 | ENSP00000326806 |
| ENSP00000325677 | ENSP00000336842 |
| ENSP00000325677 | ENSP00000340409 |
| ENSP00000325677 | ENSP00000343885 |
| ENSP00000325677 | ENSP00000346986 |
| ENSP00000325677 | ENSP00000350967 |
| ENSP00000325677 | ENSP00000353622 |
| ENSP00000325677 | ENSP00000354720 |
| ENSP00000325677 | ENSP00000354977 |
| ENSP00000325677 | ENSP00000355205 |
| ENSP00000325677 | ENSP00000355541 |
| ENSP00000325677 | ENSP00000355629 |
| ENSP00000325677 | ENSP00000356405 |
| ENSP00000325677 | ENSP00000357887 |
| ENSP00000325677 | ENSP00000358478 |
| ENSP00000325677 | ENSP00000359740 |
| ENSP00000325677 | ENSP00000360473 |
| ENSP00000325677 | ENSP00000360515 |
| ENSP00000325677 | ENSP00000360782 |
| ENSP00000325677 | ENSP00000361577 |
| ENSP00000325677 | ENSP00000363734 |
| ENSP00000325677 | ENSP00000363779 |
| ENSP00000325677 | ENSP00000364289 |
| ENSP00000325677 | ENSP00000365588 |
| ENSP00000325677 | ENSP00000367029 |
| ENSP00000325677 | ENSP00000369695 |
| ENSP00000325677 | ENSP00000370719 |
| ENSP00000325677 | ENSP00000371888 |
| ENSP00000325677 | ENSP00000372694 |
| ENSP00000325677 | ENSP00000373060 |
| ENSP00000325677 | ENSP00000374213 |

|                 |                 |
|-----------------|-----------------|
| ENSP00000325677 | ENSP00000374280 |
| ENSP00000325677 | ENSP00000374529 |
| ENSP00000325677 | ENSP00000377747 |
| ENSP00000325677 | ENSP00000379217 |
| ENSP00000325677 | ENSP00000380460 |
| ENSP00000325677 | ENSP00000381698 |
| ENSP00000325677 | ENSP00000382177 |
| ENSP00000325677 | ENSP00000382562 |
| ENSP00000325677 | ENSP00000384048 |
| ENSP00000325677 | ENSP00000386759 |
| ENSP00000325677 | ENSP00000387429 |
| ENSP00000325677 | ENSP00000397259 |
| ENSP00000325677 | ENSP00000402240 |
| ENSP00000325677 | ENSP00000404318 |
| ENSP00000325677 | ENSP00000406293 |
| ENSP00000325677 | ENSP00000409167 |
| ENSP00000325677 | ENSP00000412319 |
| ENSP00000325677 | ENSP00000412922 |
| ENSP00000325677 | ENSP00000415678 |
| ENSP00000325690 | ENSP00000327213 |
| ENSP00000325690 | ENSP00000341208 |
| ENSP00000325690 | ENSP00000344456 |
| ENSP00000325690 | ENSP00000347087 |
| ENSP00000325690 | ENSP00000351015 |
| ENSP00000325690 | ENSP00000355759 |
| ENSP00000325690 | ENSP00000362751 |
| ENSP00000325690 | ENSP00000365439 |
| ENSP00000325690 | ENSP00000379607 |
| ENSP00000325690 | ENSP00000381098 |
| ENSP00000325690 | ENSP00000399968 |
| ENSP00000325690 | ENSP00000412566 |
| ENSP00000325863 | ENSP00000327197 |
| ENSP00000325863 | ENSP00000328079 |
| ENSP00000325863 | ENSP00000329419 |
| ENSP00000325863 | ENSP00000329466 |
| ENSP00000325863 | ENSP00000334675 |
| ENSP00000325863 | ENSP00000335357 |
| ENSP00000325863 | ENSP00000336606 |
| ENSP00000325863 | ENSP00000337353 |
| ENSP00000325863 | ENSP00000339109 |
| ENSP00000325863 | ENSP00000340766 |
| ENSP00000325863 | ENSP00000340879 |
| ENSP00000325863 | ENSP00000342026 |
| ENSP00000325863 | ENSP00000343190 |
| ENSP00000325863 | ENSP00000343392 |
| ENSP00000325863 | ENSP00000343741 |

|                 |                 |
|-----------------|-----------------|
| ENSP00000325863 | ENSP00000347232 |
| ENSP00000325863 | ENSP00000347836 |
| ENSP00000325863 | ENSP00000347978 |
| ENSP00000325863 | ENSP00000348089 |
| ENSP00000325863 | ENSP00000349213 |
| ENSP00000325863 | ENSP00000349393 |
| ENSP00000325863 | ENSP00000349823 |
| ENSP00000325863 | ENSP00000350283 |
| ENSP00000325863 | ENSP00000351284 |
| ENSP00000325863 | ENSP00000351524 |
| ENSP00000325863 | ENSP00000351697 |
| ENSP00000325863 | ENSP00000351947 |
| ENSP00000325863 | ENSP00000352257 |
| ENSP00000325863 | ENSP00000353332 |
| ENSP00000325863 | ENSP00000353793 |
| ENSP00000325863 | ENSP00000354522 |
| ENSP00000325863 | ENSP00000354916 |
| ENSP00000325863 | ENSP00000355011 |
| ENSP00000325863 | ENSP00000355205 |
| ENSP00000325863 | ENSP00000355261 |
| ENSP00000325863 | ENSP00000355759 |
| ENSP00000325863 | ENSP00000356329 |
| ENSP00000325863 | ENSP00000357887 |
| ENSP00000325863 | ENSP00000358478 |
| ENSP00000325863 | ENSP00000358576 |
| ENSP00000325863 | ENSP00000359818 |
| ENSP00000325863 | ENSP00000360116 |
| ENSP00000325863 | ENSP00000360310 |
| ENSP00000325863 | ENSP00000360532 |
| ENSP00000325863 | ENSP00000360621 |
| ENSP00000325863 | ENSP00000360817 |
| ENSP00000325863 | ENSP00000361642 |
| ENSP00000325863 | ENSP00000362441 |
| ENSP00000325863 | ENSP00000364929 |
| ENSP00000325863 | ENSP00000367527 |
| ENSP00000325863 | ENSP00000367841 |
| ENSP00000325863 | ENSP00000368349 |
| ENSP00000325863 | ENSP00000368438 |
| ENSP00000325863 | ENSP00000368646 |
| ENSP00000325863 | ENSP00000368824 |
| ENSP00000325863 | ENSP00000368856 |
| ENSP00000325863 | ENSP00000369335 |
| ENSP00000325863 | ENSP00000369411 |
| ENSP00000325863 | ENSP00000369716 |
| ENSP00000325863 | ENSP00000370151 |
| ENSP00000325863 | ENSP00000373060 |

|                 |                 |
|-----------------|-----------------|
| ENSP00000325863 | ENSP00000374213 |
| ENSP00000325863 | ENSP00000375809 |
| ENSP00000325863 | ENSP00000377655 |
| ENSP00000325863 | ENSP00000377747 |
| ENSP00000325863 | ENSP00000380460 |
| ENSP00000325863 | ENSP00000380504 |
| ENSP00000325863 | ENSP00000384048 |
| ENSP00000325863 | ENSP00000386520 |
| ENSP00000325863 | ENSP00000389709 |
| ENSP00000325863 | ENSP00000392028 |
| ENSP00000325863 | ENSP00000394649 |
| ENSP00000325863 | ENSP00000394791 |
| ENSP00000325863 | ENSP00000397830 |
| ENSP00000325863 | ENSP00000402527 |
| ENSP00000325863 | ENSP00000406868 |
| ENSP00000325863 | ENSP00000407047 |
| ENSP00000325863 | ENSP00000408020 |
| ENSP00000325863 | ENSP00000409167 |
| ENSP00000325863 | ENSP00000417281 |
| ENSP00000325863 | ENSP00000418734 |
| ENSP00000325919 | ENSP00000329915 |
| ENSP00000325919 | ENSP00000335808 |
| ENSP00000325919 | ENSP00000362334 |
| ENSP00000325919 | ENSP00000370222 |
| ENSP00000325919 | ENSP00000401445 |
| ENSP00000325941 | ENSP00000360141 |
| ENSP00000326052 | ENSP00000354499 |
| ENSP00000326119 | ENSP00000329623 |
| ENSP00000326119 | ENSP00000358022 |
| ENSP00000326119 | ENSP00000370047 |
| ENSP00000326128 | ENSP00000329466 |
| ENSP00000326128 | ENSP00000357047 |
| ENSP00000326128 | ENSP00000362306 |
| ENSP00000326128 | ENSP00000362948 |
| ENSP00000326128 | ENSP00000366843 |
| ENSP00000326128 | ENSP00000381216 |
| ENSP00000326128 | ENSP00000391774 |
| ENSP00000326128 | ENSP00000392617 |
| ENSP00000326128 | ENSP00000418734 |
| ENSP00000326200 | ENSP00000329466 |
| ENSP00000326238 | ENSP00000334958 |
| ENSP00000326238 | ENSP00000338727 |
| ENSP00000326238 | ENSP00000348163 |
| ENSP00000326238 | ENSP00000348602 |
| ENSP00000326238 | ENSP00000365147 |
| ENSP00000326238 | ENSP00000365891 |

|                 |                 |
|-----------------|-----------------|
| ENSP00000326238 | ENSP00000375857 |
| ENSP00000326238 | ENSP00000380431 |
| ENSP00000326238 | ENSP00000382177 |
| ENSP00000326238 | ENSP00000382492 |
| ENSP00000326261 | ENSP00000329466 |
| ENSP00000326261 | ENSP00000331040 |
| ENSP00000326261 | ENSP00000339095 |
| ENSP00000326261 | ENSP00000340896 |
| ENSP00000326261 | ENSP00000342374 |
| ENSP00000326261 | ENSP00000346120 |
| ENSP00000326261 | ENSP00000348708 |
| ENSP00000326261 | ENSP00000349748 |
| ENSP00000326261 | ENSP00000354720 |
| ENSP00000326261 | ENSP00000357206 |
| ENSP00000326261 | ENSP00000357283 |
| ENSP00000326261 | ENSP00000358242 |
| ENSP00000326261 | ENSP00000360532 |
| ENSP00000326261 | ENSP00000362820 |
| ENSP00000326261 | ENSP00000362900 |
| ENSP00000326261 | ENSP00000368755 |
| ENSP00000326261 | ENSP00000376973 |
| ENSP00000326261 | ENSP00000377969 |
| ENSP00000326261 | ENSP00000380414 |
| ENSP00000326261 | ENSP00000380921 |
| ENSP00000326261 | ENSP00000384048 |
| ENSP00000326261 | ENSP00000384675 |
| ENSP00000326261 | ENSP00000396704 |
| ENSP00000326261 | ENSP00000400591 |
| ENSP00000326261 | ENSP00000412566 |
| ENSP00000326272 | ENSP00000363708 |
| ENSP00000326296 | ENSP00000329357 |
| ENSP00000326296 | ENSP00000361990 |
| ENSP00000326296 | ENSP00000362588 |
| ENSP00000326296 | ENSP00000364524 |
| ENSP00000326296 | ENSP00000396068 |
| ENSP00000326340 | ENSP00000343313 |
| ENSP00000326340 | ENSP00000374455 |
| ENSP00000326366 | ENSP00000329623 |
| ENSP00000326366 | ENSP00000333873 |
| ENSP00000326366 | ENSP00000340820 |
| ENSP00000326366 | ENSP00000344456 |
| ENSP00000326366 | ENSP00000345229 |
| ENSP00000326366 | ENSP00000349022 |
| ENSP00000326366 | ENSP00000358105 |
| ENSP00000326366 | ENSP00000358374 |
| ENSP00000326366 | ENSP00000358404 |

|                 |                 |
|-----------------|-----------------|
| ENSP00000326366 | ENSP00000359206 |
| ENSP00000326366 | ENSP00000362718 |
| ENSP00000326366 | ENSP00000366460 |
| ENSP00000326366 | ENSP00000366513 |
| ENSP00000326366 | ENSP00000367440 |
| ENSP00000326366 | ENSP00000394071 |
| ENSP00000326366 | ENSP00000401445 |
| ENSP00000326379 | ENSP00000327889 |
| ENSP00000326379 | ENSP00000385722 |
| ENSP00000326391 | ENSP00000367972 |
| ENSP00000326391 | ENSP00000380019 |
| ENSP00000326411 | ENSP00000332171 |
| ENSP00000326411 | ENSP00000334148 |
| ENSP00000326411 | ENSP00000337839 |
| ENSP00000326424 | ENSP00000330343 |
| ENSP00000326424 | ENSP00000357880 |
| ENSP00000326424 | ENSP00000359507 |
| ENSP00000326424 | ENSP00000361064 |
| ENSP00000326424 | ENSP00000370718 |
| ENSP00000326424 | ENSP00000408058 |
| ENSP00000326477 | ENSP00000340896 |
| ENSP00000326477 | ENSP00000367030 |
| ENSP00000326514 | ENSP00000331201 |
| ENSP00000326514 | ENSP00000334100 |
| ENSP00000326514 | ENSP00000339299 |
| ENSP00000326514 | ENSP00000341538 |
| ENSP00000326514 | ENSP00000343535 |
| ENSP00000326514 | ENSP00000349049 |
| ENSP00000326514 | ENSP00000353564 |
| ENSP00000326514 | ENSP00000354486 |
| ENSP00000326514 | ENSP00000355596 |
| ENSP00000326514 | ENSP00000358059 |
| ENSP00000326514 | ENSP00000358742 |
| ENSP00000326514 | ENSP00000360532 |
| ENSP00000326514 | ENSP00000361824 |
| ENSP00000326514 | ENSP00000362399 |
| ENSP00000326514 | ENSP00000362424 |
| ENSP00000326514 | ENSP00000365477 |
| ENSP00000326514 | ENSP00000373301 |
| ENSP00000326514 | ENSP00000382177 |
| ENSP00000326514 | ENSP00000383115 |
| ENSP00000326514 | ENSP00000389934 |
| ENSP00000326514 | ENSP00000394071 |
| ENSP00000326519 | ENSP00000328940 |
| ENSP00000326519 | ENSP00000335557 |
| ENSP00000326519 | ENSP00000340896 |

|                 |                 |
|-----------------|-----------------|
| ENSP00000326519 | ENSP00000351894 |
| ENSP00000326519 | ENSP00000384048 |
| ENSP00000326531 | ENSP00000380969 |
| ENSP00000326531 | ENSP00000387006 |
| ENSP00000326534 | ENSP00000327650 |
| ENSP00000326534 | ENSP00000344055 |
| ENSP00000326534 | ENSP00000347408 |
| ENSP00000326534 | ENSP00000353741 |
| ENSP00000326534 | ENSP00000354558 |
| ENSP00000326534 | ENSP00000360252 |
| ENSP00000326534 | ENSP00000361465 |
| ENSP00000326534 | ENSP00000369810 |
| ENSP00000326534 | ENSP00000386212 |
| ENSP00000326550 | ENSP00000346566 |
| ENSP00000326550 | ENSP00000348573 |
| ENSP00000326550 | ENSP00000358478 |
| ENSP00000326550 | ENSP00000384179 |
| ENSP00000326579 | ENSP00000350353 |
| ENSP00000326579 | ENSP00000358695 |
| ENSP00000326579 | ENSP00000387262 |
| ENSP00000326581 | ENSP00000343535 |
| ENSP00000326581 | ENSP00000350283 |
| ENSP00000326603 | ENSP00000360532 |
| ENSP00000326649 | ENSP00000338457 |
| ENSP00000326699 | ENSP00000331268 |
| ENSP00000326699 | ENSP00000340466 |
| ENSP00000326699 | ENSP00000344431 |
| ENSP00000326699 | ENSP00000346809 |
| ENSP00000326699 | ENSP00000350012 |
| ENSP00000326699 | ENSP00000357998 |
| ENSP00000326699 | ENSP00000358022 |
| ENSP00000326699 | ENSP00000360076 |
| ENSP00000326699 | ENSP00000360270 |
| ENSP00000326699 | ENSP00000361064 |
| ENSP00000326699 | ENSP00000361845 |
| ENSP00000326699 | ENSP00000362807 |
| ENSP00000326699 | ENSP00000364188 |
| ENSP00000326699 | ENSP00000377527 |
| ENSP00000326699 | ENSP00000415203 |
| ENSP00000326767 | ENSP00000337340 |
| ENSP00000326767 | ENSP00000342343 |
| ENSP00000326767 | ENSP00000347733 |
| ENSP00000326767 | ENSP00000348069 |
| ENSP00000326767 | ENSP00000348610 |
| ENSP00000326767 | ENSP00000354951 |
| ENSP00000326767 | ENSP00000357047 |



|                 |                 |
|-----------------|-----------------|
| ENSP00000326767 | ENSP00000357907 |
| ENSP00000326767 | ENSP00000362948 |
| ENSP00000326767 | ENSP00000363193 |
| ENSP00000326767 | ENSP00000364403 |
| ENSP00000326767 | ENSP00000389427 |
| ENSP00000326767 | ENSP00000391774 |
| ENSP00000326767 | ENSP00000403852 |
| ENSP00000326806 | ENSP00000331817 |
| ENSP00000326806 | ENSP00000331879 |
| ENSP00000326806 | ENSP00000331907 |
| ENSP00000326806 | ENSP00000332103 |
| ENSP00000326806 | ENSP00000332198 |
| ENSP00000326806 | ENSP00000332444 |
| ENSP00000326806 | ENSP00000334148 |
| ENSP00000326806 | ENSP00000335321 |
| ENSP00000326806 | ENSP00000337405 |
| ENSP00000326806 | ENSP00000338862 |
| ENSP00000326806 | ENSP00000339090 |
| ENSP00000326806 | ENSP00000339881 |
| ENSP00000326806 | ENSP00000340766 |
| ENSP00000326806 | ENSP00000342374 |
| ENSP00000326806 | ENSP00000343557 |
| ENSP00000326806 | ENSP00000344241 |
| ENSP00000326806 | ENSP00000346120 |
| ENSP00000326806 | ENSP00000346986 |
| ENSP00000326806 | ENSP00000347087 |
| ENSP00000326806 | ENSP00000348010 |
| ENSP00000326806 | ENSP00000348784 |
| ENSP00000326806 | ENSP00000350491 |
| ENSP00000326806 | ENSP00000352738 |
| ENSP00000326806 | ENSP00000354040 |
| ENSP00000326806 | ENSP00000355261 |
| ENSP00000326806 | ENSP00000356146 |
| ENSP00000326806 | ENSP00000356448 |
| ENSP00000326806 | ENSP00000358563 |
| ENSP00000326806 | ENSP00000358812 |
| ENSP00000326806 | ENSP00000359345 |
| ENSP00000326806 | ENSP00000360116 |
| ENSP00000326806 | ENSP00000360310 |
| ENSP00000326806 | ENSP00000360532 |
| ENSP00000326806 | ENSP00000361010 |
| ENSP00000326806 | ENSP00000361557 |
| ENSP00000326806 | ENSP00000361577 |
| ENSP00000326806 | ENSP00000361949 |
| ENSP00000326806 | ENSP00000362110 |
| ENSP00000326806 | ENSP00000362900 |

|                 |                 |
|-----------------|-----------------|
| ENSP00000326806 | ENSP00000362936 |
| ENSP00000326806 | ENSP00000364289 |
| ENSP00000326806 | ENSP00000366557 |
| ENSP00000326806 | ENSP00000366843 |
| ENSP00000326806 | ENSP00000370151 |
| ENSP00000326806 | ENSP00000370589 |
| ENSP00000326806 | ENSP00000372093 |
| ENSP00000326806 | ENSP00000372199 |
| ENSP00000326806 | ENSP00000374390 |
| ENSP00000326806 | ENSP00000376973 |
| ENSP00000326806 | ENSP00000377262 |
| ENSP00000326806 | ENSP00000379607 |
| ENSP00000326806 | ENSP00000379888 |
| ENSP00000326806 | ENSP00000380982 |
| ENSP00000326806 | ENSP00000382562 |
| ENSP00000326806 | ENSP00000382779 |
| ENSP00000326806 | ENSP00000387006 |
| ENSP00000326806 | ENSP00000391432 |
| ENSP00000326806 | ENSP00000391774 |
| ENSP00000326806 | ENSP00000400591 |
| ENSP00000326806 | ENSP00000401371 |
| ENSP00000326806 | ENSP00000402338 |
| ENSP00000326806 | ENSP00000402515 |
| ENSP00000326806 | ENSP00000412566 |
| ENSP00000326806 | ENSP00000418734 |
| ENSP00000326813 | ENSP00000331487 |
| ENSP00000326813 | ENSP00000343001 |
| ENSP00000326813 | ENSP00000353804 |
| ENSP00000326813 | ENSP00000363338 |
| ENSP00000326813 | ENSP00000380460 |
| ENSP00000326813 | ENSP00000380598 |
| ENSP00000326819 | ENSP00000333283 |
| ENSP00000326819 | ENSP00000334145 |
| ENSP00000326819 | ENSP00000350283 |
| ENSP00000326819 | ENSP00000367808 |
| ENSP00000326819 | ENSP00000367910 |
| ENSP00000326819 | ENSP00000373952 |
| ENSP00000326819 | ENSP00000385021 |
| ENSP00000326869 | ENSP00000330730 |
| ENSP00000326869 | ENSP00000344106 |
| ENSP00000326869 | ENSP00000354519 |
| ENSP00000326869 | ENSP00000356405 |
| ENSP00000326869 | ENSP00000361667 |
| ENSP00000326869 | ENSP00000364188 |
| ENSP00000326879 | ENSP00000360569 |
| ENSP00000326921 | ENSP00000328079 |

|                 |                  |
|-----------------|------------------|
| ENSP00000326921 | ENSP00000329419  |
| ENSP00000326921 | ENSP00000330408  |
| ENSP00000326921 | ENSP00000331487  |
| ENSP00000326921 | ENSP000003343001 |
| ENSP00000326921 | ENSP000003354673 |
| ENSP00000326921 | ENSP000003357048 |
| ENSP00000326921 | ENSP000003360183 |
| ENSP00000326921 | ENSP000003380460 |
| ENSP00000326933 | ENSP00000336750  |
| ENSP00000326981 | ENSP00000327179  |
| ENSP00000326981 | ENSP00000328854  |
| ENSP00000326981 | ENSP00000331019  |
| ENSP00000326981 | ENSP00000336702  |
| ENSP00000326981 | ENSP00000337127  |
| ENSP00000326981 | ENSP00000339095  |
| ENSP00000326981 | ENSP00000341885  |
| ENSP00000326981 | ENSP00000345096  |
| ENSP00000326981 | ENSP00000345156  |
| ENSP00000326981 | ENSP00000346015  |
| ENSP00000326981 | ENSP00000346022  |
| ENSP00000326981 | ENSP00000346037  |
| ENSP00000326981 | ENSP00000346050  |
| ENSP00000326981 | ENSP00000346067  |
| ENSP00000326981 | ENSP00000354739  |
| ENSP00000326981 | ENSP00000355471  |
| ENSP00000326981 | ENSP00000355541  |
| ENSP00000326981 | ENSP00000356134  |
| ENSP00000326981 | ENSP00000358140  |
| ENSP00000326981 | ENSP00000359345  |
| ENSP00000326981 | ENSP00000359688  |
| ENSP00000326981 | ENSP00000360031  |
| ENSP00000326981 | ENSP00000361076  |
| ENSP00000326981 | ENSP00000362036  |
| ENSP00000326981 | ENSP00000362744  |
| ENSP00000326981 | ENSP00000363018  |
| ENSP00000326981 | ENSP00000363642  |
| ENSP00000326981 | ENSP00000363676  |
| ENSP00000326981 | ENSP00000363746  |
| ENSP00000326981 | ENSP00000364320  |
| ENSP00000326981 | ENSP00000365837  |
| ENSP00000326981 | ENSP00000366519  |
| ENSP00000326981 | ENSP00000368790  |
| ENSP00000326981 | ENSP00000369757  |
| ENSP00000326981 | ENSP00000370589  |
| ENSP00000326981 | ENSP00000371101  |
| ENSP00000326981 | ENSP00000372445  |

|                 |                 |
|-----------------|-----------------|
| ENSP00000326981 | ENSP00000372695 |
| ENSP00000326981 | ENSP00000375730 |
| ENSP00000326981 | ENSP00000377486 |
| ENSP00000326981 | ENSP00000377640 |
| ENSP00000326981 | ENSP00000379339 |
| ENSP00000326981 | ENSP00000379888 |
| ENSP00000326981 | ENSP00000382392 |
| ENSP00000326981 | ENSP00000384302 |
| ENSP00000326981 | ENSP00000389103 |
| ENSP00000326981 | ENSP00000392859 |
| ENSP00000326981 | ENSP00000393241 |
| ENSP00000326981 | ENSP00000399454 |
| ENSP00000326981 | ENSP00000402338 |
| ENSP00000326981 | ENSP00000402869 |
| ENSP00000326981 | ENSP00000403175 |
| ENSP00000326981 | ENSP00000405614 |
| ENSP00000326981 | ENSP00000410396 |
| ENSP00000326981 | ENSP00000412583 |
| ENSP00000326981 | ENSP00000414321 |
| ENSP00000326981 | ENSP00000416110 |
| ENSP00000326981 | ENSP00000420714 |
| ENSP00000327009 | ENSP00000346566 |
| ENSP00000327009 | ENSP00000347719 |
| ENSP00000327009 | ENSP00000350708 |
| ENSP00000327009 | ENSP00000355560 |
| ENSP00000327009 | ENSP00000358994 |
| ENSP00000327009 | ENSP00000360065 |
| ENSP00000327009 | ENSP00000360473 |
| ENSP00000327009 | ENSP00000361800 |
| ENSP00000327009 | ENSP00000364742 |
| ENSP00000327009 | ENSP00000374566 |
| ENSP00000327009 | ENSP00000377793 |
| ENSP00000327009 | ENSP00000384290 |
| ENSP00000327009 | ENSP00000408910 |
| ENSP00000327009 | ENSP00000414906 |
| ENSP00000327048 | ENSP00000353622 |
| ENSP00000327048 | ENSP00000358854 |
| ENSP00000327048 | ENSP00000414187 |
| ENSP00000327070 | ENSP00000331897 |
| ENSP00000327070 | ENSP00000332887 |
| ENSP00000327070 | ENSP00000335304 |
| ENSP00000327070 | ENSP00000339933 |
| ENSP00000327070 | ENSP00000340019 |
| ENSP00000327070 | ENSP00000342056 |
| ENSP00000327070 | ENSP00000342087 |
| ENSP00000327070 | ENSP00000347495 |

|                 |                 |
|-----------------|-----------------|
| ENSP00000327070 | ENSP00000348163 |
| ENSP00000327070 | ENSP00000349016 |
| ENSP00000327070 | ENSP00000349142 |
| ENSP00000327070 | ENSP00000349887 |
| ENSP00000327070 | ENSP00000353826 |
| ENSP00000327070 | ENSP00000355518 |
| ENSP00000327070 | ENSP00000356652 |
| ENSP00000327070 | ENSP00000358312 |
| ENSP00000327070 | ENSP00000360286 |
| ENSP00000327070 | ENSP00000362413 |
| ENSP00000327070 | ENSP00000364486 |
| ENSP00000327070 | ENSP00000367086 |
| ENSP00000327070 | ENSP00000368438 |
| ENSP00000327070 | ENSP00000371888 |
| ENSP00000327070 | ENSP00000373918 |
| ENSP00000327070 | ENSP00000376946 |
| ENSP00000327070 | ENSP00000377527 |
| ENSP00000327070 | ENSP00000379607 |
| ENSP00000327070 | ENSP00000384675 |
| ENSP00000327070 | ENSP00000387262 |
| ENSP00000327070 | ENSP00000389649 |
| ENSP00000327070 | ENSP00000394071 |
| ENSP00000327070 | ENSP00000407401 |
| ENSP00000327072 | ENSP00000350767 |
| ENSP00000327072 | ENSP00000352514 |
| ENSP00000327077 | ENSP00000329466 |
| ENSP00000327077 | ENSP00000330408 |
| ENSP00000327077 | ENSP00000334002 |
| ENSP00000327077 | ENSP00000352572 |
| ENSP00000327077 | ENSP00000353564 |
| ENSP00000327077 | ENSP00000353701 |
| ENSP00000327077 | ENSP00000357965 |
| ENSP00000327077 | ENSP00000361202 |
| ENSP00000327077 | ENSP00000365016 |
| ENSP00000327077 | ENSP00000365877 |
| ENSP00000327077 | ENSP00000367408 |
| ENSP00000327077 | ENSP00000368686 |
| ENSP00000327077 | ENSP00000370031 |
| ENSP00000327077 | ENSP00000375863 |
| ENSP00000327077 | ENSP00000378368 |
| ENSP00000327077 | ENSP00000381031 |
| ENSP00000327077 | ENSP00000393583 |
| ENSP00000327107 | ENSP00000371483 |
| ENSP00000327107 | ENSP00000417085 |
| ENSP00000327145 | ENSP00000329466 |
| ENSP00000327145 | ENSP00000352272 |

|                 |                 |
|-----------------|-----------------|
| ENSP00000327145 | ENSP00000365678 |
| ENSP00000327145 | ENSP00000368766 |
| ENSP00000327145 | ENSP00000371512 |
| ENSP00000327145 | ENSP00000379607 |
| ENSP00000327145 | ENSP00000380349 |
| ENSP00000327145 | ENSP00000397598 |
| ENSP00000327145 | ENSP00000409279 |
| ENSP00000327154 | ENSP00000350708 |
| ENSP00000327154 | ENSP00000382562 |
| ENSP00000327179 | ENSP00000328854 |
| ENSP00000327179 | ENSP00000329466 |
| ENSP00000327179 | ENSP00000339145 |
| ENSP00000327179 | ENSP00000353246 |
| ENSP00000327179 | ENSP00000354040 |
| ENSP00000327179 | ENSP00000355471 |
| ENSP00000327179 | ENSP00000355541 |
| ENSP00000327179 | ENSP00000358812 |
| ENSP00000327179 | ENSP00000360031 |
| ENSP00000327179 | ENSP00000362105 |
| ENSP00000327179 | ENSP00000362532 |
| ENSP00000327179 | ENSP00000363642 |
| ENSP00000327179 | ENSP00000363746 |
| ENSP00000327179 | ENSP00000364289 |
| ENSP00000327179 | ENSP00000367439 |
| ENSP00000327179 | ENSP00000369042 |
| ENSP00000327179 | ENSP00000370258 |
| ENSP00000327179 | ENSP00000370589 |
| ENSP00000327179 | ENSP00000370968 |
| ENSP00000327179 | ENSP00000371101 |
| ENSP00000327179 | ENSP00000371169 |
| ENSP00000327179 | ENSP00000372695 |
| ENSP00000327179 | ENSP00000377944 |
| ENSP00000327179 | ENSP00000377954 |
| ENSP00000327179 | ENSP00000379888 |
| ENSP00000327179 | ENSP00000384302 |
| ENSP00000327179 | ENSP00000386134 |
| ENSP00000327179 | ENSP00000399454 |
| ENSP00000327179 | ENSP00000402869 |
| ENSP00000327179 | ENSP00000405614 |
| ENSP00000327179 | ENSP00000410396 |
| ENSP00000327197 | ENSP00000331817 |
| ENSP00000327197 | ENSP00000336606 |
| ENSP00000327197 | ENSP00000336712 |
| ENSP00000327197 | ENSP00000343701 |
| ENSP00000327197 | ENSP00000346453 |
| ENSP00000327197 | ENSP00000347232 |

|                 |                 |
|-----------------|-----------------|
| ENSP00000327197 | ENSP00000351284 |
| ENSP00000327197 | ENSP00000352257 |
| ENSP00000327197 | ENSP00000354522 |
| ENSP00000327197 | ENSP00000354957 |
| ENSP00000327197 | ENSP00000356448 |
| ENSP00000327197 | ENSP00000365811 |
| ENSP00000327197 | ENSP00000369335 |
| ENSP00000327197 | ENSP00000377655 |
| ENSP00000327197 | ENSP00000396704 |
| ENSP00000327197 | ENSP00000402527 |
| ENSP00000327213 | ENSP00000333275 |
| ENSP00000327213 | ENSP00000340995 |
| ENSP00000327213 | ENSP00000347948 |
| ENSP00000327213 | ENSP00000352516 |
| ENSP00000327213 | ENSP00000358335 |
| ENSP00000327213 | ENSP00000363812 |
| ENSP00000327213 | ENSP00000368253 |
| ENSP00000327213 | ENSP00000381098 |
| ENSP00000327213 | ENSP00000399968 |
| ENSP00000327268 | ENSP00000356972 |
| ENSP00000327268 | ENSP00000368523 |
| ENSP00000327268 | ENSP00000378605 |
| ENSP00000327309 | ENSP00000328079 |
| ENSP00000327309 | ENSP00000329419 |
| ENSP00000327309 | ENSP00000337688 |
| ENSP00000327309 | ENSP00000346733 |
| ENSP00000327309 | ENSP00000349877 |
| ENSP00000327309 | ENSP00000349887 |
| ENSP00000327309 | ENSP00000350297 |
| ENSP00000327309 | ENSP00000356405 |
| ENSP00000327309 | ENSP00000357048 |
| ENSP00000327309 | ENSP00000359484 |
| ENSP00000327315 | ENSP00000348215 |
| ENSP00000327315 | ENSP00000348349 |
| ENSP00000327315 | ENSP00000351333 |
| ENSP00000327315 | ENSP00000355596 |
| ENSP00000327315 | ENSP00000363921 |
| ENSP00000327315 | ENSP00000380450 |
| ENSP00000327315 | ENSP00000384675 |
| ENSP00000327315 | ENSP00000399511 |
| ENSP00000327315 | ENSP00000402084 |
| ENSP00000327436 | ENSP00000357748 |
| ENSP00000327436 | ENSP00000377865 |
| ENSP00000327436 | ENSP00000379607 |
| ENSP00000327487 | ENSP00000343741 |
| ENSP00000327487 | ENSP00000353741 |

|                 |                 |
|-----------------|-----------------|
| ENSP00000327487 | ENSP00000355299 |
| ENSP00000327509 | ENSP00000358081 |
| ENSP00000327509 | ENSP00000363250 |
| ENSP00000327509 | ENSP00000386621 |
| ENSP00000327513 | ENSP00000348307 |
| ENSP00000327513 | ENSP00000364898 |
| ENSP00000327513 | ENSP00000399588 |
| ENSP00000327541 | ENSP00000355777 |
| ENSP00000327541 | ENSP00000359837 |
| ENSP00000327541 | ENSP00000381031 |
| ENSP00000327545 | ENSP00000363787 |
| ENSP00000327545 | ENSP00000372699 |
| ENSP00000327545 | ENSP00000396271 |
| ENSP00000327545 | ENSP00000396439 |
| ENSP00000327545 | ENSP00000400572 |
| ENSP00000327545 | ENSP00000412190 |
| ENSP00000327647 | ENSP00000337797 |
| ENSP00000327647 | ENSP00000343701 |
| ENSP00000327650 | ENSP00000334100 |
| ENSP00000327650 | ENSP00000339122 |
| ENSP00000327650 | ENSP00000344055 |
| ENSP00000327650 | ENSP00000348455 |
| ENSP00000327650 | ENSP00000348877 |
| ENSP00000327650 | ENSP00000354558 |
| ENSP00000327650 | ENSP00000360532 |
| ENSP00000327650 | ENSP00000366225 |
| ENSP00000327650 | ENSP00000366565 |
| ENSP00000327650 | ENSP00000389934 |
| ENSP00000327650 | ENSP00000401435 |
| ENSP00000327650 | ENSP00000418661 |
| ENSP00000327704 | ENSP00000345773 |
| ENSP00000327704 | ENSP00000354951 |
| ENSP00000327716 | ENSP00000338533 |
| ENSP00000327716 | ENSP00000342181 |
| ENSP00000327716 | ENSP00000346809 |
| ENSP00000327716 | ENSP00000349877 |
| ENSP00000327716 | ENSP00000349887 |
| ENSP00000327716 | ENSP00000350708 |
| ENSP00000327716 | ENSP00000350967 |
| ENSP00000327716 | ENSP00000352738 |
| ENSP00000327716 | ENSP00000356405 |
| ENSP00000327716 | ENSP00000357887 |
| ENSP00000327716 | ENSP00000359848 |
| ENSP00000327716 | ENSP00000360149 |
| ENSP00000327716 | ENSP00000360183 |
| ENSP00000327716 | ENSP00000360644 |



|                 |                 |
|-----------------|-----------------|
| ENSP00000327716 | ENSP00000361845 |
| ENSP00000327716 | ENSP00000363779 |
| ENSP00000327716 | ENSP00000374280 |
| ENSP00000327716 | ENSP00000377280 |
| ENSP00000327716 | ENSP00000377401 |
| ENSP00000327716 | ENSP00000377769 |
| ENSP00000327716 | ENSP00000397441 |
| ENSP00000327716 | ENSP00000402240 |
| ENSP00000327716 | ENSP00000412922 |
| ENSP00000327716 | ENSP00000420608 |
| ENSP00000327821 | ENSP00000328671 |
| ENSP00000327821 | ENSP00000329466 |
| ENSP00000327821 | ENSP00000343081 |
| ENSP00000327821 | ENSP00000347345 |
| ENSP00000327821 | ENSP00000348107 |
| ENSP00000327821 | ENSP00000348722 |
| ENSP00000327821 | ENSP00000352400 |
| ENSP00000327821 | ENSP00000353073 |
| ENSP00000327821 | ENSP00000353575 |
| ENSP00000327821 | ENSP00000354739 |
| ENSP00000327821 | ENSP00000356476 |
| ENSP00000327821 | ENSP00000356744 |
| ENSP00000327821 | ENSP00000356811 |
| ENSP00000327821 | ENSP00000356989 |
| ENSP00000327821 | ENSP00000358423 |
| ENSP00000327821 | ENSP00000362576 |
| ENSP00000327821 | ENSP00000365534 |
| ENSP00000327821 | ENSP00000365837 |
| ENSP00000327821 | ENSP00000366135 |
| ENSP00000327821 | ENSP00000366620 |
| ENSP00000327821 | ENSP00000370741 |
| ENSP00000327821 | ENSP00000372023 |
| ENSP00000327821 | ENSP00000374399 |
| ENSP00000327821 | ENSP00000376309 |
| ENSP00000327821 | ENSP00000377040 |
| ENSP00000327821 | ENSP00000377954 |
| ENSP00000327824 | ENSP00000329991 |
| ENSP00000327889 | ENSP00000340220 |
| ENSP00000327889 | ENSP00000355961 |
| ENSP00000327889 | ENSP00000362170 |
| ENSP00000327889 | ENSP00000381064 |
| ENSP00000327889 | ENSP00000385722 |
| ENSP00000327889 | ENSP00000398208 |
| ENSP00000327889 | ENSP00000414237 |
| ENSP00000327889 | ENSP00000418210 |
| ENSP00000327959 | ENSP00000329102 |

|                 |                 |
|-----------------|-----------------|
| ENSP00000327959 | ENSP00000348596 |
| ENSP00000327959 | ENSP00000353622 |
| ENSP00000327959 | ENSP00000361990 |
| ENSP00000327959 | ENSP00000366534 |
| ENSP00000328023 | ENSP00000355177 |
| ENSP00000328023 | ENSP00000363018 |
| ENSP00000328079 | ENSP00000331201 |
| ENSP00000328079 | ENSP00000336752 |
| ENSP00000328079 | ENSP00000341159 |
| ENSP00000328079 | ENSP00000347498 |
| ENSP00000328079 | ENSP00000349970 |
| ENSP00000328079 | ENSP00000355890 |
| ENSP00000328079 | ENSP00000356530 |
| ENSP00000328079 | ENSP00000356744 |
| ENSP00000328079 | ENSP00000359000 |
| ENSP00000328079 | ENSP00000360183 |
| ENSP00000328079 | ENSP00000362413 |
| ENSP00000328079 | ENSP00000364188 |
| ENSP00000328079 | ENSP00000369897 |
| ENSP00000328079 | ENSP00000378529 |
| ENSP00000328079 | ENSP00000381293 |
| ENSP00000328079 | ENSP00000382779 |
| ENSP00000328079 | ENSP00000391944 |
| ENSP00000328079 | ENSP00000397441 |
| ENSP00000328079 | ENSP00000401445 |
| ENSP00000328088 | ENSP00000349142 |
| ENSP00000328103 | ENSP00000341551 |
| ENSP00000328103 | ENSP00000349078 |
| ENSP00000328103 | ENSP00000393275 |
| ENSP00000328103 | ENSP00000409279 |
| ENSP00000328133 | ENSP00000413319 |
| ENSP00000328169 | ENSP00000352455 |
| ENSP00000328169 | ENSP00000362717 |
| ENSP00000328169 | ENSP00000364685 |
| ENSP00000328169 | ENSP00000380019 |
| ENSP00000328169 | ENSP00000381293 |
| ENSP00000328169 | ENSP00000389111 |
| ENSP00000328169 | ENSP00000400223 |
| ENSP00000328182 | ENSP00000411409 |
| ENSP00000328187 | ENSP00000379607 |
| ENSP00000328203 | ENSP00000347836 |
| ENSP00000328203 | ENSP00000354201 |
| ENSP00000328203 | ENSP00000360116 |
| ENSP00000328203 | ENSP00000365435 |
| ENSP00000328207 | ENSP00000385470 |
| ENSP00000328228 | ENSP00000394085 |

|                 |                 |
|-----------------|-----------------|
| ENSP00000328287 | ENSP00000349785 |
| ENSP00000328287 | ENSP00000360821 |
| ENSP00000328287 | ENSP00000406490 |
| ENSP00000328325 | ENSP00000344936 |
| ENSP00000328426 | ENSP00000329466 |
| ENSP00000328464 | ENSP00000354972 |
| ENSP00000328487 | ENSP00000404220 |
| ENSP00000328631 | ENSP00000347184 |
| ENSP00000328671 | ENSP00000334188 |
| ENSP00000328671 | ENSP00000343081 |
| ENSP00000328671 | ENSP00000348722 |
| ENSP00000328671 | ENSP00000365837 |
| ENSP00000328671 | ENSP00000366519 |
| ENSP00000328671 | ENSP00000382392 |
| ENSP00000328671 | ENSP00000419740 |
| ENSP00000328690 | ENSP00000329466 |
| ENSP00000328690 | ENSP00000338862 |
| ENSP00000328690 | ENSP00000339795 |
| ENSP00000328690 | ENSP00000343557 |
| ENSP00000328690 | ENSP00000344220 |
| ENSP00000328690 | ENSP00000346120 |
| ENSP00000328690 | ENSP00000346725 |
| ENSP00000328690 | ENSP00000351596 |
| ENSP00000328690 | ENSP00000352738 |
| ENSP00000328690 | ENSP00000353246 |
| ENSP00000328690 | ENSP00000354040 |
| ENSP00000328690 | ENSP00000358400 |
| ENSP00000328690 | ENSP00000358563 |
| ENSP00000328690 | ENSP00000358812 |
| ENSP00000328690 | ENSP00000359345 |
| ENSP00000328690 | ENSP00000359939 |
| ENSP00000328690 | ENSP00000360286 |
| ENSP00000328690 | ENSP00000360412 |
| ENSP00000328690 | ENSP00000360828 |
| ENSP00000328690 | ENSP00000361076 |
| ENSP00000328690 | ENSP00000361232 |
| ENSP00000328690 | ENSP00000361465 |
| ENSP00000328690 | ENSP00000362744 |
| ENSP00000328690 | ENSP00000363018 |
| ENSP00000328690 | ENSP00000363676 |
| ENSP00000328690 | ENSP00000364543 |
| ENSP00000328690 | ENSP00000366135 |
| ENSP00000328690 | ENSP00000366519 |
| ENSP00000328690 | ENSP00000368887 |
| ENSP00000328690 | ENSP00000371101 |
| ENSP00000328690 | ENSP00000372199 |

|                 |                 |
|-----------------|-----------------|
| ENSP00000328690 | ENSP00000372827 |
| ENSP00000328690 | ENSP00000374390 |
| ENSP00000328690 | ENSP00000379607 |
| ENSP00000328690 | ENSP00000379888 |
| ENSP00000328690 | ENSP00000380495 |
| ENSP00000328690 | ENSP00000380982 |
| ENSP00000328690 | ENSP00000382392 |
| ENSP00000328690 | ENSP00000384573 |
| ENSP00000328690 | ENSP00000388872 |
| ENSP00000328690 | ENSP00000393953 |
| ENSP00000328690 | ENSP00000394400 |
| ENSP00000328690 | ENSP00000399530 |
| ENSP00000328690 | ENSP00000400626 |
| ENSP00000328690 | ENSP00000402338 |
| ENSP00000328690 | ENSP00000412310 |
| ENSP00000328720 | ENSP00000329357 |
| ENSP00000328720 | ENSP00000347733 |
| ENSP00000328720 | ENSP00000354125 |
| ENSP00000328720 | ENSP00000354916 |
| ENSP00000328720 | ENSP00000358413 |
| ENSP00000328720 | ENSP00000360621 |
| ENSP00000328720 | ENSP00000361027 |
| ENSP00000328720 | ENSP00000364119 |
| ENSP00000328720 | ENSP00000374213 |
| ENSP00000328720 | ENSP00000375986 |
| ENSP00000328720 | ENSP00000377218 |
| ENSP00000328720 | ENSP00000417132 |
| ENSP00000328773 | ENSP00000350199 |
| ENSP00000328773 | ENSP00000351926 |
| ENSP00000328773 | ENSP00000356520 |
| ENSP00000328773 | ENSP00000377148 |
| ENSP00000328773 | ENSP00000417281 |
| ENSP00000328854 | ENSP00000329466 |
| ENSP00000328854 | ENSP00000331907 |
| ENSP00000328854 | ENSP00000337340 |
| ENSP00000328854 | ENSP00000339095 |
| ENSP00000328854 | ENSP00000339479 |
| ENSP00000328854 | ENSP00000355471 |
| ENSP00000328854 | ENSP00000355541 |
| ENSP00000328854 | ENSP00000356134 |
| ENSP00000328854 | ENSP00000356448 |
| ENSP00000328854 | ENSP00000356520 |
| ENSP00000328854 | ENSP00000358812 |
| ENSP00000328854 | ENSP00000359688 |
| ENSP00000328854 | ENSP00000360031 |
| ENSP00000328854 | ENSP00000361076 |

|                 |                 |
|-----------------|-----------------|
| ENSP00000328854 | ENSP00000362105 |
| ENSP00000328854 | ENSP00000362744 |
| ENSP00000328854 | ENSP00000363642 |
| ENSP00000328854 | ENSP00000363746 |
| ENSP00000328854 | ENSP00000366135 |
| ENSP00000328854 | ENSP00000366557 |
| ENSP00000328854 | ENSP00000367439 |
| ENSP00000328854 | ENSP00000370589 |
| ENSP00000328854 | ENSP00000371101 |
| ENSP00000328854 | ENSP00000371169 |
| ENSP00000328854 | ENSP00000372695 |
| ENSP00000328854 | ENSP00000374213 |
| ENSP00000328854 | ENSP00000377944 |
| ENSP00000328854 | ENSP00000379888 |
| ENSP00000328854 | ENSP00000380982 |
| ENSP00000328854 | ENSP00000384302 |
| ENSP00000328854 | ENSP00000386134 |
| ENSP00000328854 | ENSP00000387303 |
| ENSP00000328854 | ENSP00000392601 |
| ENSP00000328854 | ENSP00000399454 |
| ENSP00000328854 | ENSP00000402869 |
| ENSP00000328854 | ENSP00000405614 |
| ENSP00000328938 | ENSP00000334188 |
| ENSP00000328938 | ENSP00000353622 |
| ENSP00000328938 | ENSP00000363734 |
| ENSP00000328938 | ENSP00000372694 |
| ENSP00000328938 | ENSP00000412319 |
| ENSP00000328938 | ENSP00000415678 |
| ENSP00000328940 | ENSP00000335557 |
| ENSP00000328940 | ENSP00000339897 |
| ENSP00000328940 | ENSP00000340879 |
| ENSP00000328940 | ENSP00000341382 |
| ENSP00000328940 | ENSP00000344668 |
| ENSP00000328940 | ENSP00000347232 |
| ENSP00000328940 | ENSP00000351284 |
| ENSP00000328940 | ENSP00000354720 |
| ENSP00000328940 | ENSP00000354957 |
| ENSP00000328940 | ENSP00000355866 |
| ENSP00000328940 | ENSP00000358716 |
| ENSP00000328940 | ENSP00000362334 |
| ENSP00000328940 | ENSP00000365588 |
| ENSP00000328940 | ENSP00000365766 |
| ENSP00000328940 | ENSP00000370083 |
| ENSP00000328940 | ENSP00000370119 |
| ENSP00000328940 | ENSP00000373060 |
| ENSP00000328940 | ENSP00000384048 |

|                 |                 |
|-----------------|-----------------|
| ENSP00000328940 | ENSP00000387429 |
| ENSP00000328940 | ENSP00000392270 |
| ENSP00000328940 | ENSP00000396484 |
| ENSP00000328940 | ENSP00000404318 |
| ENSP00000328940 | ENSP00000409167 |
| ENSP00000328940 | ENSP00000415212 |
| ENSP00000328940 | ENSP00000416511 |
| ENSP00000328968 | ENSP00000338191 |
| ENSP00000328968 | ENSP00000344668 |
| ENSP00000328968 | ENSP00000345530 |
| ENSP00000328968 | ENSP00000419952 |
| ENSP00000328992 | ENSP00000401566 |
| ENSP00000328998 | ENSP00000331201 |
| ENSP00000328998 | ENSP00000360532 |
| ENSP00000328998 | ENSP00000362424 |
| ENSP00000328998 | ENSP00000362824 |
| ENSP00000329002 | ENSP00000337797 |
| ENSP00000329002 | ENSP00000348128 |
| ENSP00000329002 | ENSP00000397435 |
| ENSP00000329002 | ENSP00000416599 |
| ENSP00000329029 | ENSP00000341243 |
| ENSP00000329029 | ENSP00000341680 |
| ENSP00000329029 | ENSP00000342889 |
| ENSP00000329029 | ENSP00000347345 |
| ENSP00000329029 | ENSP00000348010 |
| ENSP00000329029 | ENSP00000349213 |
| ENSP00000329029 | ENSP00000351575 |
| ENSP00000329029 | ENSP00000354125 |
| ENSP00000329029 | ENSP00000354742 |
| ENSP00000329029 | ENSP00000356405 |
| ENSP00000329029 | ENSP00000358140 |
| ENSP00000329029 | ENSP00000359211 |
| ENSP00000329029 | ENSP00000359290 |
| ENSP00000329029 | ENSP00000361180 |
| ENSP00000329029 | ENSP00000361219 |
| ENSP00000329029 | ENSP00000363763 |
| ENSP00000329029 | ENSP00000364119 |
| ENSP00000329029 | ENSP00000364289 |
| ENSP00000329029 | ENSP00000366828 |
| ENSP00000329029 | ENSP00000370258 |
| ENSP00000329029 | ENSP00000378736 |
| ENSP00000329029 | ENSP00000379372 |
| ENSP00000329029 | ENSP00000384597 |
| ENSP00000329029 | ENSP00000386992 |
| ENSP00000329029 | ENSP00000403852 |
| ENSP00000329029 | ENSP00000417229 |

|                 |                 |
|-----------------|-----------------|
| ENSP00000329040 | ENSP00000381891 |
| ENSP00000329097 | ENSP00000345917 |
| ENSP00000329097 | ENSP00000376204 |
| ENSP00000329097 | ENSP00000379607 |
| ENSP00000329102 | ENSP00000341947 |
| ENSP00000329102 | ENSP00000357711 |
| ENSP00000329102 | ENSP00000362592 |
| ENSP00000329102 | ENSP00000368686 |
| ENSP00000329102 | ENSP00000370258 |
| ENSP00000329106 | ENSP00000381045 |
| ENSP00000329117 | ENSP00000344456 |
| ENSP00000329117 | ENSP00000359206 |
| ENSP00000329140 | ENSP00000352047 |
| ENSP00000329140 | ENSP00000359685 |
| ENSP00000329140 | ENSP00000366395 |
| ENSP00000329140 | ENSP00000382281 |
| ENSP00000329140 | ENSP00000387209 |
| ENSP00000329140 | ENSP00000396876 |
| ENSP00000329140 | ENSP00000404623 |
| ENSP00000329140 | ENSP00000410772 |
| ENSP00000329189 | ENSP00000334188 |
| ENSP00000329189 | ENSP00000357748 |
| ENSP00000329189 | ENSP00000377865 |
| ENSP00000329219 | ENSP00000343785 |
| ENSP00000329219 | ENSP00000352257 |
| ENSP00000329219 | ENSP00000354995 |
| ENSP00000329219 | ENSP00000359634 |
| ENSP00000329357 | ENSP00000334188 |
| ENSP00000329357 | ENSP00000338157 |
| ENSP00000329357 | ENSP00000339845 |
| ENSP00000329357 | ENSP00000340896 |
| ENSP00000329357 | ENSP00000341551 |
| ENSP00000329357 | ENSP00000342667 |
| ENSP00000329357 | ENSP00000344537 |
| ENSP00000329357 | ENSP00000345702 |
| ENSP00000329357 | ENSP00000346886 |
| ENSP00000329357 | ENSP00000347184 |
| ENSP00000329357 | ENSP00000347733 |
| ENSP00000329357 | ENSP00000348069 |
| ENSP00000329357 | ENSP00000348551 |
| ENSP00000329357 | ENSP00000348799 |
| ENSP00000329357 | ENSP00000349723 |
| ENSP00000329357 | ENSP00000349748 |
| ENSP00000329357 | ENSP00000350283 |
| ENSP00000329357 | ENSP00000351407 |
| ENSP00000329357 | ENSP00000352516 |

|                 |                 |
|-----------------|-----------------|
| ENSP00000329357 | ENSP00000353622 |
| ENSP00000329357 | ENSP00000354218 |
| ENSP00000329357 | ENSP00000354632 |
| ENSP00000329357 | ENSP00000354813 |
| ENSP00000329357 | ENSP00000354850 |
| ENSP00000329357 | ENSP00000354961 |
| ENSP00000329357 | ENSP00000355153 |
| ENSP00000329357 | ENSP00000355759 |
| ENSP00000329357 | ENSP00000356817 |
| ENSP00000329357 | ENSP00000357113 |
| ENSP00000329357 | ENSP00000358490 |
| ENSP00000329357 | ENSP00000358854 |
| ENSP00000329357 | ENSP00000359206 |
| ENSP00000329357 | ENSP00000359531 |
| ENSP00000329357 | ENSP00000362592 |
| ENSP00000329357 | ENSP00000362824 |
| ENSP00000329357 | ENSP00000363804 |
| ENSP00000329357 | ENSP00000364895 |
| ENSP00000329357 | ENSP00000364898 |
| ENSP00000329357 | ENSP00000366974 |
| ENSP00000329357 | ENSP00000367705 |
| ENSP00000329357 | ENSP00000368253 |
| ENSP00000329357 | ENSP00000369042 |
| ENSP00000329357 | ENSP00000369497 |
| ENSP00000329357 | ENSP00000372170 |
| ENSP00000329357 | ENSP00000377944 |
| ENSP00000329357 | ENSP00000378306 |
| ENSP00000329357 | ENSP00000392466 |
| ENSP00000329357 | ENSP00000395535 |
| ENSP00000329357 | ENSP00000396620 |
| ENSP00000329357 | ENSP00000396976 |
| ENSP00000329357 | ENSP00000402527 |
| ENSP00000329357 | ENSP00000417281 |
| ENSP00000329380 | ENSP00000383382 |
| ENSP00000329411 | ENSP00000329967 |
| ENSP00000329411 | ENSP00000354977 |
| ENSP00000329411 | ENSP00000358997 |
| ENSP00000329411 | ENSP00000359258 |
| ENSP00000329411 | ENSP00000359490 |
| ENSP00000329411 | ENSP00000371471 |
| ENSP00000329411 | ENSP00000373700 |
| ENSP00000329411 | ENSP00000401980 |
| ENSP00000329419 | ENSP00000329466 |
| ENSP00000329419 | ENSP00000329715 |
| ENSP00000329419 | ENSP00000330945 |
| ENSP00000329419 | ENSP00000331201 |



|                 |                 |
|-----------------|-----------------|
| ENSP00000329419 | ENSP00000339090 |
| ENSP00000329419 | ENSP00000340698 |
| ENSP00000329419 | ENSP00000341159 |
| ENSP00000329419 | ENSP00000341243 |
| ENSP00000329419 | ENSP00000342300 |
| ENSP00000329419 | ENSP00000344456 |
| ENSP00000329419 | ENSP00000345530 |
| ENSP00000329419 | ENSP00000346566 |
| ENSP00000329419 | ENSP00000347498 |
| ENSP00000329419 | ENSP00000348565 |
| ENSP00000329419 | ENSP00000349887 |
| ENSP00000329419 | ENSP00000349970 |
| ENSP00000329419 | ENSP00000352928 |
| ENSP00000329419 | ENSP00000355890 |
| ENSP00000329419 | ENSP00000355927 |
| ENSP00000329419 | ENSP00000356530 |
| ENSP00000329419 | ENSP00000356744 |
| ENSP00000329419 | ENSP00000357048 |
| ENSP00000329419 | ENSP00000359000 |
| ENSP00000329419 | ENSP00000360183 |
| ENSP00000329419 | ENSP00000360532 |
| ENSP00000329419 | ENSP00000360798 |
| ENSP00000329419 | ENSP00000361057 |
| ENSP00000329419 | ENSP00000362413 |
| ENSP00000329419 | ENSP00000364188 |
| ENSP00000329419 | ENSP00000364893 |
| ENSP00000329419 | ENSP00000369897 |
| ENSP00000329419 | ENSP00000377520 |
| ENSP00000329419 | ENSP00000379228 |
| ENSP00000329419 | ENSP00000381293 |
| ENSP00000329419 | ENSP00000382779 |
| ENSP00000329419 | ENSP00000391944 |
| ENSP00000329419 | ENSP00000397441 |
| ENSP00000329419 | ENSP00000401445 |
| ENSP00000329466 | ENSP00000329662 |
| ENSP00000329466 | ENSP00000331817 |
| ENSP00000329466 | ENSP00000333253 |
| ENSP00000329466 | ENSP00000333813 |
| ENSP00000329466 | ENSP00000333920 |
| ENSP00000329466 | ENSP00000335321 |
| ENSP00000329466 | ENSP00000336712 |
| ENSP00000329466 | ENSP00000337194 |
| ENSP00000329466 | ENSP00000337926 |
| ENSP00000329466 | ENSP00000338862 |
| ENSP00000329466 | ENSP00000339095 |
| ENSP00000329466 | ENSP00000339109 |

|                 |                 |
|-----------------|-----------------|
| ENSP00000329466 | ENSP00000339145 |
| ENSP00000329466 | ENSP00000339353 |
| ENSP00000329466 | ENSP00000339529 |
| ENSP00000329466 | ENSP00000339795 |
| ENSP00000329466 | ENSP00000339957 |
| ENSP00000329466 | ENSP00000340466 |
| ENSP00000329466 | ENSP00000341138 |
| ENSP00000329466 | ENSP00000341382 |
| ENSP00000329466 | ENSP00000341885 |
| ENSP00000329466 | ENSP00000342181 |
| ENSP00000329466 | ENSP00000342434 |
| ENSP00000329466 | ENSP00000342905 |
| ENSP00000329466 | ENSP00000343535 |
| ENSP00000329466 | ENSP00000343745 |
| ENSP00000329466 | ENSP00000345156 |
| ENSP00000329466 | ENSP00000346022 |
| ENSP00000329466 | ENSP00000346027 |
| ENSP00000329466 | ENSP00000346037 |
| ENSP00000329466 | ENSP00000346050 |
| ENSP00000329466 | ENSP00000346067 |
| ENSP00000329466 | ENSP00000346088 |
| ENSP00000329466 | ENSP00000346120 |
| ENSP00000329466 | ENSP00000346236 |
| ENSP00000329466 | ENSP00000346453 |
| ENSP00000329466 | ENSP00000346550 |
| ENSP00000329466 | ENSP00000346566 |
| ENSP00000329466 | ENSP00000346725 |
| ENSP00000329466 | ENSP00000346762 |
| ENSP00000329466 | ENSP00000346839 |
| ENSP00000329466 | ENSP00000347232 |
| ENSP00000329466 | ENSP00000347495 |
| ENSP00000329466 | ENSP00000347733 |
| ENSP00000329466 | ENSP00000347978 |
| ENSP00000329466 | ENSP00000348442 |
| ENSP00000329466 | ENSP00000348510 |
| ENSP00000329466 | ENSP00000348577 |
| ENSP00000329466 | ENSP00000348886 |
| ENSP00000329466 | ENSP00000348965 |
| ENSP00000329466 | ENSP00000348984 |
| ENSP00000329466 | ENSP00000349049 |
| ENSP00000329466 | ENSP00000349213 |
| ENSP00000329466 | ENSP00000349437 |
| ENSP00000329466 | ENSP00000349748 |
| ENSP00000329466 | ENSP00000349892 |
| ENSP00000329466 | ENSP00000349977 |
| ENSP00000329466 | ENSP00000350012 |

|                 |                 |
|-----------------|-----------------|
| ENSP00000329466 | ENSP00000350199 |
| ENSP00000329466 | ENSP00000350894 |
| ENSP00000329466 | ENSP00000350990 |
| ENSP00000329466 | ENSP00000351015 |
| ENSP00000329466 | ENSP00000351113 |
| ENSP00000329466 | ENSP00000351137 |
| ENSP00000329466 | ENSP00000351284 |
| ENSP00000329466 | ENSP00000351416 |
| ENSP00000329466 | ENSP00000351524 |
| ENSP00000329466 | ENSP00000351596 |
| ENSP00000329466 | ENSP00000351811 |
| ENSP00000329466 | ENSP00000352257 |
| ENSP00000329466 | ENSP00000352308 |
| ENSP00000329466 | ENSP00000352400 |
| ENSP00000329466 | ENSP00000352463 |
| ENSP00000329466 | ENSP00000352516 |
| ENSP00000329466 | ENSP00000352572 |
| ENSP00000329466 | ENSP00000353246 |
| ENSP00000329466 | ENSP00000353375 |
| ENSP00000329466 | ENSP00000353826 |
| ENSP00000329466 | ENSP00000354040 |
| ENSP00000329466 | ENSP00000354251 |
| ENSP00000329466 | ENSP00000354347 |
| ENSP00000329466 | ENSP00000354522 |
| ENSP00000329466 | ENSP00000354532 |
| ENSP00000329466 | ENSP00000354558 |
| ENSP00000329466 | ENSP00000354964 |
| ENSP00000329466 | ENSP00000355011 |
| ENSP00000329466 | ENSP00000355518 |
| ENSP00000329466 | ENSP00000355541 |
| ENSP00000329466 | ENSP00000355922 |
| ENSP00000329466 | ENSP00000356290 |
| ENSP00000329466 | ENSP00000356319 |
| ENSP00000329466 | ENSP00000356448 |
| ENSP00000329466 | ENSP00000357048 |
| ENSP00000329466 | ENSP00000357206 |
| ENSP00000329466 | ENSP00000357283 |
| ENSP00000329466 | ENSP00000357643 |
| ENSP00000329466 | ENSP00000358374 |
| ENSP00000329466 | ENSP00000358400 |
| ENSP00000329466 | ENSP00000358716 |
| ENSP00000329466 | ENSP00000358799 |
| ENSP00000329466 | ENSP00000358812 |
| ENSP00000329466 | ENSP00000359345 |
| ENSP00000329466 | ENSP00000360031 |
| ENSP00000329466 | ENSP00000360268 |

|                 |                 |
|-----------------|-----------------|
| ENSP00000329466 | ENSP00000360412 |
| ENSP00000329466 | ENSP00000360828 |
| ENSP00000329466 | ENSP00000360922 |
| ENSP00000329466 | ENSP00000361010 |
| ENSP00000329466 | ENSP00000361076 |
| ENSP00000329466 | ENSP00000361092 |
| ENSP00000329466 | ENSP00000361202 |
| ENSP00000329466 | ENSP00000361232 |
| ENSP00000329466 | ENSP00000361658 |
| ENSP00000329466 | ENSP00000361824 |
| ENSP00000329466 | ENSP00000361949 |
| ENSP00000329466 | ENSP00000362153 |
| ENSP00000329466 | ENSP00000362413 |
| ENSP00000329466 | ENSP00000362592 |
| ENSP00000329466 | ENSP00000362688 |
| ENSP00000329466 | ENSP00000362744 |
| ENSP00000329466 | ENSP00000362820 |
| ENSP00000329466 | ENSP00000362900 |
| ENSP00000329466 | ENSP00000363018 |
| ENSP00000329466 | ENSP00000363193 |
| ENSP00000329466 | ENSP00000363559 |
| ENSP00000329466 | ENSP00000363642 |
| ENSP00000329466 | ENSP00000363746 |
| ENSP00000329466 | ENSP00000363779 |
| ENSP00000329466 | ENSP00000363944 |
| ENSP00000329466 | ENSP00000364037 |
| ENSP00000329466 | ENSP00000364289 |
| ENSP00000329466 | ENSP00000364320 |
| ENSP00000329466 | ENSP00000364403 |
| ENSP00000329466 | ENSP00000364582 |
| ENSP00000329466 | ENSP00000364912 |
| ENSP00000329466 | ENSP00000365175 |
| ENSP00000329466 | ENSP00000365233 |
| ENSP00000329466 | ENSP00000366135 |
| ENSP00000329466 | ENSP00000366557 |
| ENSP00000329466 | ENSP00000366934 |
| ENSP00000329466 | ENSP00000367263 |
| ENSP00000329466 | ENSP00000367498 |
| ENSP00000329466 | ENSP00000367721 |
| ENSP00000329466 | ENSP00000368349 |
| ENSP00000329466 | ENSP00000368646 |
| ENSP00000329466 | ENSP00000369042 |
| ENSP00000329466 | ENSP00000369335 |
| ENSP00000329466 | ENSP00000369757 |
| ENSP00000329466 | ENSP00000369887 |
| ENSP00000329466 | ENSP00000370023 |

|                 |                 |
|-----------------|-----------------|
| ENSP00000329466 | ENSP00000370517 |
| ENSP00000329466 | ENSP00000370968 |
| ENSP00000329466 | ENSP00000371101 |
| ENSP00000329466 | ENSP00000371169 |
| ENSP00000329466 | ENSP00000371236 |
| ENSP00000329466 | ENSP00000371475 |
| ENSP00000329466 | ENSP00000371634 |
| ENSP00000329466 | ENSP00000372199 |
| ENSP00000329466 | ENSP00000373060 |
| ENSP00000329466 | ENSP00000375097 |
| ENSP00000329466 | ENSP00000375863 |
| ENSP00000329466 | ENSP00000375928 |
| ENSP00000329466 | ENSP00000376309 |
| ENSP00000329466 | ENSP00000377665 |
| ENSP00000329466 | ENSP00000377747 |
| ENSP00000329466 | ENSP00000377944 |
| ENSP00000329466 | ENSP00000378295 |
| ENSP00000329466 | ENSP00000380336 |
| ENSP00000329466 | ENSP00000380495 |
| ENSP00000329466 | ENSP00000380982 |
| ENSP00000329466 | ENSP00000381031 |
| ENSP00000329466 | ENSP00000381216 |
| ENSP00000329466 | ENSP00000381577 |
| ENSP00000329466 | ENSP00000381693 |
| ENSP00000329466 | ENSP00000382177 |
| ENSP00000329466 | ENSP00000382269 |
| ENSP00000329466 | ENSP00000382392 |
| ENSP00000329466 | ENSP00000382595 |
| ENSP00000329466 | ENSP00000383623 |
| ENSP00000329466 | ENSP00000384109 |
| ENSP00000329466 | ENSP00000384302 |
| ENSP00000329466 | ENSP00000385722 |
| ENSP00000329466 | ENSP00000387170 |
| ENSP00000329466 | ENSP00000387911 |
| ENSP00000329466 | ENSP00000388872 |
| ENSP00000329466 | ENSP00000389103 |
| ENSP00000329466 | ENSP00000391723 |
| ENSP00000329466 | ENSP00000392028 |
| ENSP00000329466 | ENSP00000392601 |
| ENSP00000329466 | ENSP00000392617 |
| ENSP00000329466 | ENSP00000393596 |
| ENSP00000329466 | ENSP00000393953 |
| ENSP00000329466 | ENSP00000394071 |
| ENSP00000329466 | ENSP00000394382 |
| ENSP00000329466 | ENSP00000396301 |
| ENSP00000329466 | ENSP00000401508 |

|                 |                 |
|-----------------|-----------------|
| ENSP00000329466 | ENSP00000402338 |
| ENSP00000329466 | ENSP00000406888 |
| ENSP00000329466 | ENSP00000407879 |
| ENSP00000329466 | ENSP00000410626 |
| ENSP00000329466 | ENSP00000412310 |
| ENSP00000329466 | ENSP00000414321 |
| ENSP00000329466 | ENSP00000414373 |
| ENSP00000329466 | ENSP00000416892 |
| ENSP00000329466 | ENSP00000419851 |
| ENSP00000329468 | ENSP00000338345 |
| ENSP00000329468 | ENSP00000346236 |
| ENSP00000329558 | ENSP00000340019 |
| ENSP00000329558 | ENSP00000344431 |
| ENSP00000329558 | ENSP00000365007 |
| ENSP00000329558 | ENSP00000365766 |
| ENSP00000329558 | ENSP00000366800 |
| ENSP00000329558 | ENSP00000370377 |
| ENSP00000329558 | ENSP00000376946 |
| ENSP00000329558 | ENSP00000378605 |
| ENSP00000329558 | ENSP00000404381 |
| ENSP00000329623 | ENSP00000337838 |
| ENSP00000329623 | ENSP00000341189 |
| ENSP00000329623 | ENSP00000341957 |
| ENSP00000329623 | ENSP00000342381 |
| ENSP00000329623 | ENSP00000346697 |
| ENSP00000329623 | ENSP00000351885 |
| ENSP00000329623 | ENSP00000354720 |
| ENSP00000329623 | ENSP00000355231 |
| ENSP00000329623 | ENSP00000355759 |
| ENSP00000329623 | ENSP00000355865 |
| ENSP00000329623 | ENSP00000358022 |
| ENSP00000329623 | ENSP00000358081 |
| ENSP00000329623 | ENSP00000363591 |
| ENSP00000329623 | ENSP00000363763 |
| ENSP00000329623 | ENSP00000365016 |
| ENSP00000329623 | ENSP00000365019 |
| ENSP00000329623 | ENSP00000366607 |
| ENSP00000329623 | ENSP00000367407 |
| ENSP00000329623 | ENSP00000370003 |
| ENSP00000329623 | ENSP00000370083 |
| ENSP00000329623 | ENSP00000370119 |
| ENSP00000329623 | ENSP00000389277 |
| ENSP00000329623 | ENSP00000392330 |
| ENSP00000329662 | ENSP00000339145 |
| ENSP00000329662 | ENSP00000352257 |
| ENSP00000329662 | ENSP00000354522 |

|                 |                 |
|-----------------|-----------------|
| ENSP00000329662 | ENSP00000355205 |
| ENSP00000329662 | ENSP00000370589 |
| ENSP00000329662 | ENSP00000372023 |
| ENSP00000329662 | ENSP00000379607 |
| ENSP00000329662 | ENSP00000381657 |
| ENSP00000329662 | ENSP00000384490 |
| ENSP00000329668 | ENSP00000343785 |
| ENSP00000329715 | ENSP00000332444 |
| ENSP00000329715 | ENSP00000335304 |
| ENSP00000329715 | ENSP00000338157 |
| ENSP00000329715 | ENSP00000338788 |
| ENSP00000329715 | ENSP00000340281 |
| ENSP00000329715 | ENSP00000340684 |
| ENSP00000329715 | ENSP00000343479 |
| ENSP00000329715 | ENSP00000344456 |
| ENSP00000329715 | ENSP00000344460 |
| ENSP00000329715 | ENSP00000350012 |
| ENSP00000329715 | ENSP00000352257 |
| ENSP00000329715 | ENSP00000352738 |
| ENSP00000329715 | ENSP00000357051 |
| ENSP00000329715 | ENSP00000358563 |
| ENSP00000329715 | ENSP00000358812 |
| ENSP00000329715 | ENSP00000359454 |
| ENSP00000329715 | ENSP00000360532 |
| ENSP00000329715 | ENSP00000361982 |
| ENSP00000329715 | ENSP00000377640 |
| ENSP00000329715 | ENSP00000379607 |
| ENSP00000329715 | ENSP00000381031 |
| ENSP00000329715 | ENSP00000420357 |
| ENSP00000329797 | ENSP00000341138 |
| ENSP00000329797 | ENSP00000367408 |
| ENSP00000329858 | ENSP00000353741 |
| ENSP00000329915 | ENSP00000362334 |
| ENSP00000329915 | ENSP00000370222 |
| ENSP00000329933 | ENSP00000331310 |
| ENSP00000329933 | ENSP00000334061 |
| ENSP00000329933 | ENSP00000334130 |
| ENSP00000329933 | ENSP00000336868 |
| ENSP00000329933 | ENSP00000337396 |
| ENSP00000329933 | ENSP00000340271 |
| ENSP00000329933 | ENSP00000342181 |
| ENSP00000329933 | ENSP00000344504 |
| ENSP00000329933 | ENSP00000349213 |
| ENSP00000329933 | ENSP00000351284 |
| ENSP00000329933 | ENSP00000353622 |
| ENSP00000329933 | ENSP00000355013 |

|                 |                 |
|-----------------|-----------------|
| ENSP00000329933 | ENSP00000355136 |
| ENSP00000329933 | ENSP00000356405 |
| ENSP00000329933 | ENSP00000357907 |
| ENSP00000329933 | ENSP00000358854 |
| ENSP00000329933 | ENSP00000360031 |
| ENSP00000329933 | ENSP00000361465 |
| ENSP00000329933 | ENSP00000362578 |
| ENSP00000329933 | ENSP00000362592 |
| ENSP00000329933 | ENSP00000364929 |
| ENSP00000329933 | ENSP00000365811 |
| ENSP00000329933 | ENSP00000374213 |
| ENSP00000329933 | ENSP00000377747 |
| ENSP00000329933 | ENSP00000381657 |
| ENSP00000329933 | ENSP00000386759 |
| ENSP00000329933 | ENSP00000392028 |
| ENSP00000329933 | ENSP00000404658 |
| ENSP00000329933 | ENSP00000417980 |
| ENSP00000329933 | ENSP00000418734 |
| ENSP00000329967 | ENSP00000331288 |
| ENSP00000329967 | ENSP00000339795 |
| ENSP00000329967 | ENSP00000342755 |
| ENSP00000329967 | ENSP00000344668 |
| ENSP00000329967 | ENSP00000349748 |
| ENSP00000329967 | ENSP00000354777 |
| ENSP00000329967 | ENSP00000359206 |
| ENSP00000329967 | ENSP00000360215 |
| ENSP00000329967 | ENSP00000363089 |
| ENSP00000329967 | ENSP00000363676 |
| ENSP00000329967 | ENSP00000377218 |
| ENSP00000329967 | ENSP00000377492 |
| ENSP00000329967 | ENSP00000379612 |
| ENSP00000329967 | ENSP00000379888 |
| ENSP00000329967 | ENSP00000389111 |
| ENSP00000329967 | ENSP00000399968 |
| ENSP00000329967 | ENSP00000401980 |
| ENSP00000329967 | ENSP00000403175 |
| ENSP00000329967 | ENSP00000416110 |
| ENSP00000329967 | ENSP00000419371 |
| ENSP00000330060 | ENSP00000360532 |
| ENSP00000330070 | ENSP00000367878 |
| ENSP00000330070 | ENSP00000379607 |
| ENSP00000330074 | ENSP00000334538 |
| ENSP00000330074 | ENSP00000350894 |
| ENSP00000330074 | ENSP00000355205 |
| ENSP00000330074 | ENSP00000359988 |
| ENSP00000330074 | ENSP00000360621 |



|                 |                 |
|-----------------|-----------------|
| ENSP00000330074 | ENSP00000367454 |
| ENSP00000330074 | ENSP00000372023 |
| ENSP00000330074 | ENSP00000372170 |
| ENSP00000330074 | ENSP00000386239 |
| ENSP00000330098 | ENSP00000334675 |
| ENSP00000330098 | ENSP00000348089 |
| ENSP00000330098 | ENSP00000350708 |
| ENSP00000330098 | ENSP00000360621 |
| ENSP00000330098 | ENSP00000364270 |
| ENSP00000330188 | ENSP00000331719 |
| ENSP00000330188 | ENSP00000339723 |
| ENSP00000330188 | ENSP00000358033 |
| ENSP00000330188 | ENSP00000368439 |
| ENSP00000330188 | ENSP00000394085 |
| ENSP00000330240 | ENSP00000360922 |
| ENSP00000330320 | ENSP00000367299 |
| ENSP00000330320 | ENSP00000368140 |
| ENSP00000330320 | ENSP00000389399 |
| ENSP00000330320 | ENSP00000402935 |
| ENSP00000330343 | ENSP00000332103 |
| ENSP00000330343 | ENSP00000332721 |
| ENSP00000330343 | ENSP00000333836 |
| ENSP00000330343 | ENSP00000339881 |
| ENSP00000330343 | ENSP00000341957 |
| ENSP00000330343 | ENSP00000343023 |
| ENSP00000330343 | ENSP00000345656 |
| ENSP00000330343 | ENSP00000347184 |
| ENSP00000330343 | ENSP00000347232 |
| ENSP00000330343 | ENSP00000348168 |
| ENSP00000330343 | ENSP00000348551 |
| ENSP00000330343 | ENSP00000348577 |
| ENSP00000330343 | ENSP00000350283 |
| ENSP00000330343 | ENSP00000350491 |
| ENSP00000330343 | ENSP00000351524 |
| ENSP00000330343 | ENSP00000351575 |
| ENSP00000330343 | ENSP00000353575 |
| ENSP00000330343 | ENSP00000355865 |
| ENSP00000330343 | ENSP00000355922 |
| ENSP00000330343 | ENSP00000356272 |
| ENSP00000330343 | ENSP00000357440 |
| ENSP00000330343 | ENSP00000357448 |
| ENSP00000330343 | ENSP00000357965 |
| ENSP00000330343 | ENSP00000360621 |
| ENSP00000330343 | ENSP00000360644 |
| ENSP00000330343 | ENSP00000361465 |
| ENSP00000330343 | ENSP00000362068 |

|                 |                 |
|-----------------|-----------------|
| ENSP00000330343 | ENSP00000363021 |
| ENSP00000330343 | ENSP00000364794 |
| ENSP00000330343 | ENSP00000365735 |
| ENSP00000330343 | ENSP00000366843 |
| ENSP00000330343 | ENSP00000368438 |
| ENSP00000330343 | ENSP00000368565 |
| ENSP00000330343 | ENSP00000369335 |
| ENSP00000330343 | ENSP00000369716 |
| ENSP00000330343 | ENSP00000372023 |
| ENSP00000330343 | ENSP00000374213 |
| ENSP00000330343 | ENSP00000375809 |
| ENSP00000330343 | ENSP00000375881 |
| ENSP00000330343 | ENSP00000376611 |
| ENSP00000330343 | ENSP00000377040 |
| ENSP00000330343 | ENSP00000377969 |
| ENSP00000330343 | ENSP00000380921 |
| ENSP00000330343 | ENSP00000381045 |
| ENSP00000330343 | ENSP00000384160 |
| ENSP00000330343 | ENSP00000384597 |
| ENSP00000330343 | ENSP00000387347 |
| ENSP00000330343 | ENSP00000392601 |
| ENSP00000330343 | ENSP00000396452 |
| ENSP00000330343 | ENSP00000403852 |
| ENSP00000330343 | ENSP00000412566 |
| ENSP00000330343 | ENSP00000414321 |
| ENSP00000330361 | ENSP00000405674 |
| ENSP00000330382 | ENSP00000363827 |
| ENSP00000330393 | ENSP00000340944 |
| ENSP00000330393 | ENSP00000341208 |
| ENSP00000330393 | ENSP00000342755 |
| ENSP00000330393 | ENSP00000345179 |
| ENSP00000330393 | ENSP00000356346 |
| ENSP00000330393 | ENSP00000409346 |
| ENSP00000330408 | ENSP00000331201 |
| ENSP00000330408 | ENSP00000343741 |
| ENSP00000330408 | ENSP00000347498 |
| ENSP00000330408 | ENSP00000348081 |
| ENSP00000330408 | ENSP00000350199 |
| ENSP00000330408 | ENSP00000351926 |
| ENSP00000330408 | ENSP00000353575 |
| ENSP00000330408 | ENSP00000356602 |
| ENSP00000330408 | ENSP00000360268 |
| ENSP00000330408 | ENSP00000361202 |
| ENSP00000330408 | ENSP00000361433 |
| ENSP00000330408 | ENSP00000364119 |
| ENSP00000330408 | ENSP00000365016 |

|                 |                 |
|-----------------|-----------------|
| ENSP00000330408 | ENSP00000378368 |
| ENSP00000330408 | ENSP00000378529 |
| ENSP00000330408 | ENSP00000383431 |
| ENSP00000330408 | ENSP00000394869 |
| ENSP00000330484 | ENSP00000379607 |
| ENSP00000330509 | ENSP00000347719 |
| ENSP00000330509 | ENSP00000373363 |
| ENSP00000330753 | ENSP00000357047 |
| ENSP00000330753 | ENSP00000384490 |
| ENSP00000330787 | ENSP00000347988 |
| ENSP00000330787 | ENSP00000381031 |
| ENSP00000330812 | ENSP00000333946 |
| ENSP00000330812 | ENSP00000341662 |
| ENSP00000330812 | ENSP00000348762 |
| ENSP00000330812 | ENSP00000360918 |
| ENSP00000330812 | ENSP00000370194 |
| ENSP00000330812 | ENSP00000379430 |
| ENSP00000330836 | ENSP00000331369 |
| ENSP00000330836 | ENSP00000341679 |
| ENSP00000330836 | ENSP00000345681 |
| ENSP00000330836 | ENSP00000353622 |
| ENSP00000330836 | ENSP00000356410 |
| ENSP00000330836 | ENSP00000356785 |
| ENSP00000330836 | ENSP00000358146 |
| ENSP00000330836 | ENSP00000359818 |
| ENSP00000330836 | ENSP00000360488 |
| ENSP00000330836 | ENSP00000361186 |
| ENSP00000330836 | ENSP00000362110 |
| ENSP00000330836 | ENSP00000362413 |
| ENSP00000330836 | ENSP00000374455 |
| ENSP00000330836 | ENSP00000377914 |
| ENSP00000330836 | ENSP00000379065 |
| ENSP00000330836 | ENSP00000399511 |
| ENSP00000330836 | ENSP00000410833 |
| ENSP00000330875 | ENSP00000361824 |
| ENSP00000330875 | ENSP00000367808 |
| ENSP00000330875 | ENSP00000367910 |
| ENSP00000330875 | ENSP00000373952 |
| ENSP00000330875 | ENSP00000385021 |
| ENSP00000330918 | ENSP00000355467 |
| ENSP00000330918 | ENSP00000418661 |
| ENSP00000330945 | ENSP00000331268 |
| ENSP00000330945 | ENSP00000341538 |
| ENSP00000330945 | ENSP00000343435 |
| ENSP00000330945 | ENSP00000346809 |
| ENSP00000330945 | ENSP00000347329 |

|                 |                 |
|-----------------|-----------------|
| ENSP00000330945 | ENSP00000349970 |
| ENSP00000330945 | ENSP00000357048 |
| ENSP00000330945 | ENSP00000359305 |
| ENSP00000330945 | ENSP00000359321 |
| ENSP00000330945 | ENSP00000361057 |
| ENSP00000330945 | ENSP00000364188 |
| ENSP00000330945 | ENSP00000367407 |
| ENSP00000330945 | ENSP00000380793 |
| ENSP00000331019 | ENSP00000339095 |
| ENSP00000331019 | ENSP00000341885 |
| ENSP00000331019 | ENSP00000346050 |
| ENSP00000331019 | ENSP00000346067 |
| ENSP00000331019 | ENSP00000348455 |
| ENSP00000331019 | ENSP00000361076 |
| ENSP00000331019 | ENSP00000362744 |
| ENSP00000331019 | ENSP00000363308 |
| ENSP00000331019 | ENSP00000369757 |
| ENSP00000331019 | ENSP00000379339 |
| ENSP00000331019 | ENSP00000379888 |
| ENSP00000331019 | ENSP00000393241 |
| ENSP00000331019 | ENSP00000403175 |
| ENSP00000331019 | ENSP00000412583 |
| ENSP00000331019 | ENSP00000414321 |
| ENSP00000331019 | ENSP00000416110 |
| ENSP00000331019 | ENSP00000417281 |
| ENSP00000331019 | ENSP00000417748 |
| ENSP00000331019 | ENSP00000420714 |
| ENSP00000331040 | ENSP00000367972 |
| ENSP00000331057 | ENSP00000341243 |
| ENSP00000331057 | ENSP00000346697 |
| ENSP00000331057 | ENSP00000351250 |
| ENSP00000331057 | ENSP00000358590 |
| ENSP00000331057 | ENSP00000365687 |
| ENSP00000331057 | ENSP00000366534 |
| ENSP00000331057 | ENSP00000367972 |
| ENSP00000331057 | ENSP00000418734 |
| ENSP00000331062 | ENSP00000356191 |
| ENSP00000331087 | ENSP00000338413 |
| ENSP00000331087 | ENSP00000359454 |
| ENSP00000331087 | ENSP00000361824 |
| ENSP00000331087 | ENSP00000401566 |
| ENSP00000331106 | ENSP00000356563 |
| ENSP00000331106 | ENSP00000357051 |
| ENSP00000331106 | ENSP00000358918 |
| ENSP00000331111 | ENSP00000334188 |
| ENSP00000331111 | ENSP00000335357 |

|                 |                 |
|-----------------|-----------------|
| ENSP00000331111 | ENSP00000339845 |
| ENSP00000331111 | ENSP00000342889 |
| ENSP00000331111 | ENSP00000343745 |
| ENSP00000331111 | ENSP00000347345 |
| ENSP00000331111 | ENSP00000354916 |
| ENSP00000331111 | ENSP00000357887 |
| ENSP00000331111 | ENSP00000360515 |
| ENSP00000331111 | ENSP00000361465 |
| ENSP00000331111 | ENSP00000366828 |
| ENSP00000331111 | ENSP00000366843 |
| ENSP00000331111 | ENSP00000367029 |
| ENSP00000331111 | ENSP00000370968 |
| ENSP00000331111 | ENSP00000371729 |
| ENSP00000331111 | ENSP00000380504 |
| ENSP00000331111 | ENSP00000386134 |
| ENSP00000331111 | ENSP00000403852 |
| ENSP00000331152 | ENSP00000351490 |
| ENSP00000331152 | ENSP00000353622 |
| ENSP00000331152 | ENSP00000354720 |
| ENSP00000331152 | ENSP00000369816 |
| ENSP00000331201 | ENSP00000331487 |
| ENSP00000331201 | ENSP00000334002 |
| ENSP00000331201 | ENSP00000334100 |
| ENSP00000331201 | ENSP00000336712 |
| ENSP00000331201 | ENSP00000338413 |
| ENSP00000331201 | ENSP00000338799 |
| ENSP00000331201 | ENSP00000343001 |
| ENSP00000331201 | ENSP00000344456 |
| ENSP00000331201 | ENSP00000344460 |
| ENSP00000331201 | ENSP00000344666 |
| ENSP00000331201 | ENSP00000345530 |
| ENSP00000331201 | ENSP00000346050 |
| ENSP00000331201 | ENSP00000347301 |
| ENSP00000331201 | ENSP00000347379 |
| ENSP00000331201 | ENSP00000350718 |
| ENSP00000331201 | ENSP00000353564 |
| ENSP00000331201 | ENSP00000354207 |
| ENSP00000331201 | ENSP00000354522 |
| ENSP00000331201 | ENSP00000354673 |
| ENSP00000331201 | ENSP00000356290 |
| ENSP00000331201 | ENSP00000357048 |
| ENSP00000331201 | ENSP00000358335 |
| ENSP00000331201 | ENSP00000359567 |
| ENSP00000331201 | ENSP00000359688 |
| ENSP00000331201 | ENSP00000360183 |
| ENSP00000331201 | ENSP00000360540 |

|                 |                 |
|-----------------|-----------------|
| ENSP00000331201 | ENSP00000360715 |
| ENSP00000331201 | ENSP00000360798 |
| ENSP00000331201 | ENSP00000361014 |
| ENSP00000331201 | ENSP00000361048 |
| ENSP00000331201 | ENSP00000362115 |
| ENSP00000331201 | ENSP00000362399 |
| ENSP00000331201 | ENSP00000363089 |
| ENSP00000331201 | ENSP00000365550 |
| ENSP00000331201 | ENSP00000366746 |
| ENSP00000331201 | ENSP00000367408 |
| ENSP00000331201 | ENSP00000369318 |
| ENSP00000331201 | ENSP00000374443 |
| ENSP00000331201 | ENSP00000380460 |
| ENSP00000331201 | ENSP00000380921 |
| ENSP00000331201 | ENSP00000381795 |
| ENSP00000331201 | ENSP00000388340 |
| ENSP00000331201 | ENSP00000408910 |
| ENSP00000331201 | ENSP00000418803 |
| ENSP00000331211 | ENSP00000355205 |
| ENSP00000331211 | ENSP00000372023 |
| ENSP00000331242 | ENSP00000336702 |
| ENSP00000331242 | ENSP00000347134 |
| ENSP00000331242 | ENSP00000359552 |
| ENSP00000331242 | ENSP00000363081 |
| ENSP00000331242 | ENSP00000370719 |
| ENSP00000331268 | ENSP00000331897 |
| ENSP00000331268 | ENSP00000333813 |
| ENSP00000331268 | ENSP00000340466 |
| ENSP00000331268 | ENSP00000357998 |
| ENSP00000331268 | ENSP00000360644 |
| ENSP00000331268 | ENSP00000364188 |
| ENSP00000331268 | ENSP00000365007 |
| ENSP00000331268 | ENSP00000386621 |
| ENSP00000331288 | ENSP00000349087 |
| ENSP00000331288 | ENSP00000350012 |
| ENSP00000331288 | ENSP00000354977 |
| ENSP00000331288 | ENSP00000357113 |
| ENSP00000331288 | ENSP00000358997 |
| ENSP00000331288 | ENSP00000359385 |
| ENSP00000331288 | ENSP00000361057 |
| ENSP00000331288 | ENSP00000362298 |
| ENSP00000331288 | ENSP00000363095 |
| ENSP00000331288 | ENSP00000364188 |
| ENSP00000331288 | ENSP00000381237 |
| ENSP00000331288 | ENSP00000401980 |
| ENSP00000331310 | ENSP00000334130 |

|                 |                 |
|-----------------|-----------------|
| ENSP00000331310 | ENSP00000334188 |
| ENSP00000331310 | ENSP00000340896 |
| ENSP00000331310 | ENSP00000345656 |
| ENSP00000331310 | ENSP00000347168 |
| ENSP00000331310 | ENSP00000347733 |
| ENSP00000331310 | ENSP00000348784 |
| ENSP00000331310 | ENSP00000349213 |
| ENSP00000331310 | ENSP00000350283 |
| ENSP00000331310 | ENSP00000350512 |
| ENSP00000331310 | ENSP00000350767 |
| ENSP00000331310 | ENSP00000353622 |
| ENSP00000331310 | ENSP00000355388 |
| ENSP00000331310 | ENSP00000356470 |
| ENSP00000331310 | ENSP00000356989 |
| ENSP00000331310 | ENSP00000357283 |
| ENSP00000331310 | ENSP00000357887 |
| ENSP00000331310 | ENSP00000359518 |
| ENSP00000331310 | ENSP00000359818 |
| ENSP00000331310 | ENSP00000360473 |
| ENSP00000331310 | ENSP00000362166 |
| ENSP00000331310 | ENSP00000363734 |
| ENSP00000331310 | ENSP00000363745 |
| ENSP00000331310 | ENSP00000364929 |
| ENSP00000331310 | ENSP00000365025 |
| ENSP00000331310 | ENSP00000365439 |
| ENSP00000331310 | ENSP00000366974 |
| ENSP00000331310 | ENSP00000367034 |
| ENSP00000331310 | ENSP00000368439 |
| ENSP00000331310 | ENSP00000369497 |
| ENSP00000331310 | ENSP00000369695 |
| ENSP00000331310 | ENSP00000370083 |
| ENSP00000331310 | ENSP00000370119 |
| ENSP00000331310 | ENSP00000371888 |
| ENSP00000331310 | ENSP00000372694 |
| ENSP00000331310 | ENSP00000373340 |
| ENSP00000331310 | ENSP00000374213 |
| ENSP00000331310 | ENSP00000377262 |
| ENSP00000331310 | ENSP00000382688 |
| ENSP00000331310 | ENSP00000384675 |
| ENSP00000331310 | ENSP00000386722 |
| ENSP00000331310 | ENSP00000386759 |
| ENSP00000331310 | ENSP00000392617 |
| ENSP00000331310 | ENSP00000394085 |
| ENSP00000331310 | ENSP00000412319 |
| ENSP00000331310 | ENSP00000415678 |
| ENSP00000331313 | ENSP00000347733 |

|                 |                 |
|-----------------|-----------------|
| ENSP00000331358 | ENSP00000335544 |
| ENSP00000331369 | ENSP00000349658 |
| ENSP00000331369 | ENSP00000360147 |
| ENSP00000331369 | ENSP00000370150 |
| ENSP00000331479 | ENSP00000331487 |
| ENSP00000331479 | ENSP00000358831 |
| ENSP00000331479 | ENSP00000365766 |
| ENSP00000331487 | ENSP00000332681 |
| ENSP00000331487 | ENSP00000337053 |
| ENSP00000331487 | ENSP00000343001 |
| ENSP00000331487 | ENSP00000346130 |
| ENSP00000331487 | ENSP00000347498 |
| ENSP00000331487 | ENSP00000347836 |
| ENSP00000331487 | ENSP00000349887 |
| ENSP00000331487 | ENSP00000350708 |
| ENSP00000331487 | ENSP00000354673 |
| ENSP00000331487 | ENSP00000355261 |
| ENSP00000331487 | ENSP00000359380 |
| ENSP00000331487 | ENSP00000363338 |
| ENSP00000331487 | ENSP00000364240 |
| ENSP00000331487 | ENSP00000364289 |
| ENSP00000331487 | ENSP00000366395 |
| ENSP00000331487 | ENSP00000379457 |
| ENSP00000331487 | ENSP00000380460 |
| ENSP00000331487 | ENSP00000381282 |
| ENSP00000331487 | ENSP00000382767 |
| ENSP00000331487 | ENSP00000383719 |
| ENSP00000331487 | ENSP00000386621 |
| ENSP00000331487 | ENSP00000387262 |
| ENSP00000331487 | ENSP00000393596 |
| ENSP00000331500 | ENSP00000361990 |
| ENSP00000331608 | ENSP00000361990 |
| ENSP00000331678 | ENSP00000380921 |
| ENSP00000331719 | ENSP00000343701 |
| ENSP00000331719 | ENSP00000347548 |
| ENSP00000331719 | ENSP00000356470 |
| ENSP00000331719 | ENSP00000363972 |
| ENSP00000331719 | ENSP00000365811 |
| ENSP00000331719 | ENSP00000366030 |
| ENSP00000331719 | ENSP00000368605 |
| ENSP00000331719 | ENSP00000376268 |
| ENSP00000331719 | ENSP00000398410 |
| ENSP00000331727 | ENSP00000345731 |
| ENSP00000331727 | ENSP00000351015 |
| ENSP00000331727 | ENSP00000367408 |
| ENSP00000331727 | ENSP00000419952 |



|                 |                 |
|-----------------|-----------------|
| ENSP00000331746 | ENSP00000353701 |
| ENSP00000331746 | ENSP00000379607 |
| ENSP00000331784 | ENSP00000360532 |
| ENSP00000331817 | ENSP00000331907 |
| ENSP00000331817 | ENSP00000332103 |
| ENSP00000331817 | ENSP00000332444 |
| ENSP00000331817 | ENSP00000333401 |
| ENSP00000331817 | ENSP00000337405 |
| ENSP00000331817 | ENSP00000337839 |
| ENSP00000331817 | ENSP00000338862 |
| ENSP00000331817 | ENSP00000339145 |
| ENSP00000331817 | ENSP00000339353 |
| ENSP00000331817 | ENSP00000339845 |
| ENSP00000331817 | ENSP00000340281 |
| ENSP00000331817 | ENSP00000342381 |
| ENSP00000331817 | ENSP00000343557 |
| ENSP00000331817 | ENSP00000344055 |
| ENSP00000331817 | ENSP00000346120 |
| ENSP00000331817 | ENSP00000346206 |
| ENSP00000331817 | ENSP00000346453 |
| ENSP00000331817 | ENSP00000346725 |
| ENSP00000331817 | ENSP00000347087 |
| ENSP00000331817 | ENSP00000348596 |
| ENSP00000331817 | ENSP00000348714 |
| ENSP00000331817 | ENSP00000350491 |
| ENSP00000331817 | ENSP00000352400 |
| ENSP00000331817 | ENSP00000352514 |
| ENSP00000331817 | ENSP00000352738 |
| ENSP00000331817 | ENSP00000352820 |
| ENSP00000331817 | ENSP00000353059 |
| ENSP00000331817 | ENSP00000353246 |
| ENSP00000331817 | ENSP00000354040 |
| ENSP00000331817 | ENSP00000355541 |
| ENSP00000331817 | ENSP00000356448 |
| ENSP00000331817 | ENSP00000356470 |
| ENSP00000331817 | ENSP00000358563 |
| ENSP00000331817 | ENSP00000358812 |
| ENSP00000331817 | ENSP00000360286 |
| ENSP00000331817 | ENSP00000360412 |
| ENSP00000331817 | ENSP00000360621 |
| ENSP00000331817 | ENSP00000361232 |
| ENSP00000331817 | ENSP00000361245 |
| ENSP00000331817 | ENSP00000361577 |
| ENSP00000331817 | ENSP00000361949 |
| ENSP00000331817 | ENSP00000362171 |
| ENSP00000331817 | ENSP00000362900 |

|                 |                 |
|-----------------|-----------------|
| ENSP00000331817 | ENSP00000363313 |
| ENSP00000331817 | ENSP00000363338 |
| ENSP00000331817 | ENSP00000364289 |
| ENSP00000331817 | ENSP00000364293 |
| ENSP00000331817 | ENSP00000366135 |
| ENSP00000331817 | ENSP00000366519 |
| ENSP00000331817 | ENSP00000366607 |
| ENSP00000331817 | ENSP00000366953 |
| ENSP00000331817 | ENSP00000368984 |
| ENSP00000331817 | ENSP00000370736 |
| ENSP00000331817 | ENSP00000372445 |
| ENSP00000331817 | ENSP00000374280 |
| ENSP00000331817 | ENSP00000374390 |
| ENSP00000331817 | ENSP00000374529 |
| ENSP00000331817 | ENSP00000379607 |
| ENSP00000331817 | ENSP00000380969 |
| ENSP00000331817 | ENSP00000380982 |
| ENSP00000331817 | ENSP00000381657 |
| ENSP00000331817 | ENSP00000382392 |
| ENSP00000331817 | ENSP00000384302 |
| ENSP00000331817 | ENSP00000384490 |
| ENSP00000331817 | ENSP00000386759 |
| ENSP00000331817 | ENSP00000394791 |
| ENSP00000331817 | ENSP00000396704 |
| ENSP00000331817 | ENSP00000402338 |
| ENSP00000331817 | ENSP00000412566 |
| ENSP00000331817 | ENSP00000417763 |
| ENSP00000331831 | ENSP00000346566 |
| ENSP00000331831 | ENSP00000356448 |
| ENSP00000331831 | ENSP00000382562 |
| ENSP00000331849 | ENSP00000348965 |
| ENSP00000331849 | ENSP00000379607 |
| ENSP00000331879 | ENSP00000333934 |
| ENSP00000331879 | ENSP00000337839 |
| ENSP00000331879 | ENSP00000341885 |
| ENSP00000331879 | ENSP00000360286 |
| ENSP00000331879 | ENSP00000362900 |
| ENSP00000331879 | ENSP00000364289 |
| ENSP00000331879 | ENSP00000364293 |
| ENSP00000331879 | ENSP00000365439 |
| ENSP00000331879 | ENSP00000366974 |
| ENSP00000331879 | ENSP00000370589 |
| ENSP00000331879 | ENSP00000378350 |
| ENSP00000331879 | ENSP00000380982 |
| ENSP00000331879 | ENSP00000414321 |
| ENSP00000331897 | ENSP00000341679 |

|                 |                 |
|-----------------|-----------------|
| ENSP00000331897 | ENSP00000343535 |
| ENSP00000331897 | ENSP00000349016 |
| ENSP00000331897 | ENSP00000355518 |
| ENSP00000331897 | ENSP00000363533 |
| ENSP00000331897 | ENSP00000363944 |
| ENSP00000331897 | ENSP00000366395 |
| ENSP00000331897 | ENSP00000379500 |
| ENSP00000331907 | ENSP00000334148 |
| ENSP00000331907 | ENSP00000351137 |
| ENSP00000331907 | ENSP00000355541 |
| ENSP00000331907 | ENSP00000358812 |
| ENSP00000331907 | ENSP00000360031 |
| ENSP00000331907 | ENSP00000360532 |
| ENSP00000331907 | ENSP00000361557 |
| ENSP00000331907 | ENSP00000361577 |
| ENSP00000331907 | ENSP00000364289 |
| ENSP00000331907 | ENSP00000366557 |
| ENSP00000331907 | ENSP00000367835 |
| ENSP00000331907 | ENSP00000371169 |
| ENSP00000331907 | ENSP00000387006 |
| ENSP00000331907 | ENSP00000391432 |
| ENSP00000331907 | ENSP00000402338 |
| ENSP00000332013 | ENSP00000353622 |
| ENSP00000332013 | ENSP00000362592 |
| ENSP00000332013 | ENSP00000364289 |
| ENSP00000332013 | ENSP00000369716 |
| ENSP00000332049 | ENSP00000355759 |
| ENSP00000332049 | ENSP00000384223 |
| ENSP00000332103 | ENSP00000334148 |
| ENSP00000332103 | ENSP00000335321 |
| ENSP00000332103 | ENSP00000337405 |
| ENSP00000332103 | ENSP00000340766 |
| ENSP00000332103 | ENSP00000343701 |
| ENSP00000332103 | ENSP00000346986 |
| ENSP00000332103 | ENSP00000347087 |
| ENSP00000332103 | ENSP00000348010 |
| ENSP00000332103 | ENSP00000351137 |
| ENSP00000332103 | ENSP00000352738 |
| ENSP00000332103 | ENSP00000355261 |
| ENSP00000332103 | ENSP00000357631 |
| ENSP00000332103 | ENSP00000358563 |
| ENSP00000332103 | ENSP00000360532 |
| ENSP00000332103 | ENSP00000361577 |
| ENSP00000332103 | ENSP00000362110 |
| ENSP00000332103 | ENSP00000363313 |
| ENSP00000332103 | ENSP00000364289 |

|                 |                 |
|-----------------|-----------------|
| ENSP00000332103 | ENSP00000365811 |
| ENSP00000332103 | ENSP00000366030 |
| ENSP00000332103 | ENSP00000366557 |
| ENSP00000332103 | ENSP00000366843 |
| ENSP00000332103 | ENSP00000367439 |
| ENSP00000332103 | ENSP00000370460 |
| ENSP00000332103 | ENSP00000376973 |
| ENSP00000332103 | ENSP00000387006 |
| ENSP00000332103 | ENSP00000410758 |
| ENSP00000332170 | ENSP00000415363 |
| ENSP00000332171 | ENSP00000332208 |
| ENSP00000332171 | ENSP00000334188 |
| ENSP00000332171 | ENSP00000338533 |
| ENSP00000332171 | ENSP00000341243 |
| ENSP00000332171 | ENSP00000344220 |
| ENSP00000332171 | ENSP00000347733 |
| ENSP00000332171 | ENSP00000349213 |
| ENSP00000332171 | ENSP00000351665 |
| ENSP00000332171 | ENSP00000353622 |
| ENSP00000332171 | ENSP00000354522 |
| ENSP00000332171 | ENSP00000356579 |
| ENSP00000332171 | ENSP00000361465 |
| ENSP00000332171 | ENSP00000367029 |
| ENSP00000332171 | ENSP00000371236 |
| ENSP00000332171 | ENSP00000374399 |
| ENSP00000332171 | ENSP00000378350 |
| ENSP00000332171 | ENSP00000384048 |
| ENSP00000332171 | ENSP00000396704 |
| ENSP00000332171 | ENSP00000397644 |
| ENSP00000332198 | ENSP00000346120 |
| ENSP00000332198 | ENSP00000358563 |
| ENSP00000332198 | ENSP00000361076 |
| ENSP00000332198 | ENSP00000361982 |
| ENSP00000332198 | ENSP00000374390 |
| ENSP00000332198 | ENSP00000402338 |
| ENSP00000332208 | ENSP00000333920 |
| ENSP00000332208 | ENSP00000343741 |
| ENSP00000332208 | ENSP00000349213 |
| ENSP00000332208 | ENSP00000368349 |
| ENSP00000332208 | ENSP00000368438 |
| ENSP00000332208 | ENSP00000372023 |
| ENSP00000332208 | ENSP00000374529 |
| ENSP00000332208 | ENSP00000375986 |
| ENSP00000332225 | ENSP00000365943 |
| ENSP00000332247 | ENSP00000352522 |
| ENSP00000332247 | ENSP00000356744 |

|                 |                 |
|-----------------|-----------------|
| ENSP00000332247 | ENSP00000358777 |
| ENSP00000332247 | ENSP00000363162 |
| ENSP00000332247 | ENSP00000365756 |
| ENSP00000332247 | ENSP00000367697 |
| ENSP00000332247 | ENSP00000369513 |
| ENSP00000332247 | ENSP00000377040 |
| ENSP00000332247 | ENSP00000408236 |
| ENSP00000332258 | ENSP00000341662 |
| ENSP00000332326 | ENSP00000334100 |
| ENSP00000332326 | ENSP00000351137 |
| ENSP00000332326 | ENSP00000353564 |
| ENSP00000332326 | ENSP00000355721 |
| ENSP00000332326 | ENSP00000360532 |
| ENSP00000332326 | ENSP00000362399 |
| ENSP00000332326 | ENSP00000366557 |
| ENSP00000332340 | ENSP00000338573 |
| ENSP00000332340 | ENSP00000338862 |
| ENSP00000332340 | ENSP00000342181 |
| ENSP00000332340 | ENSP00000346725 |
| ENSP00000332340 | ENSP00000353246 |
| ENSP00000332340 | ENSP00000354040 |
| ENSP00000332340 | ENSP00000358812 |
| ENSP00000332340 | ENSP00000360412 |
| ENSP00000332340 | ENSP00000360828 |
| ENSP00000332340 | ENSP00000361465 |
| ENSP00000332340 | ENSP00000362153 |
| ENSP00000332340 | ENSP00000366519 |
| ENSP00000332340 | ENSP00000371101 |
| ENSP00000332340 | ENSP00000380921 |
| ENSP00000332340 | ENSP00000380982 |
| ENSP00000332340 | ENSP00000382392 |
| ENSP00000332340 | ENSP00000402338 |
| ENSP00000332353 | ENSP00000346236 |
| ENSP00000332353 | ENSP00000354586 |
| ENSP00000332353 | ENSP00000355896 |
| ENSP00000332353 | ENSP00000358918 |
| ENSP00000332353 | ENSP00000363489 |
| ENSP00000332353 | ENSP00000379065 |
| ENSP00000332359 | ENSP00000361707 |
| ENSP00000332444 | ENSP00000336752 |
| ENSP00000332444 | ENSP00000339353 |
| ENSP00000332444 | ENSP00000340879 |
| ENSP00000332444 | ENSP00000342181 |
| ENSP00000332444 | ENSP00000343741 |
| ENSP00000332444 | ENSP00000349142 |
| ENSP00000332444 | ENSP00000351284 |

|                 |                 |
|-----------------|-----------------|
| ENSP00000332444 | ENSP00000352257 |
| ENSP00000332444 | ENSP00000358497 |
| ENSP00000332444 | ENSP00000359531 |
| ENSP00000332444 | ENSP00000361076 |
| ENSP00000332444 | ENSP00000361949 |
| ENSP00000332444 | ENSP00000362900 |
| ENSP00000332444 | ENSP00000366135 |
| ENSP00000332444 | ENSP00000371475 |
| ENSP00000332444 | ENSP00000372023 |
| ENSP00000332454 | ENSP00000349959 |
| ENSP00000332488 | ENSP00000341680 |
| ENSP00000332488 | ENSP00000417132 |
| ENSP00000332513 | ENSP00000358106 |
| ENSP00000332513 | ENSP00000362463 |
| ENSP00000332513 | ENSP00000368927 |
| ENSP00000332513 | ENSP00000369456 |
| ENSP00000332513 | ENSP00000370376 |
| ENSP00000332513 | ENSP00000380349 |
| ENSP00000332513 | ENSP00000386722 |
| ENSP00000332592 | ENSP00000333950 |
| ENSP00000332592 | ENSP00000334188 |
| ENSP00000332592 | ENSP00000346566 |
| ENSP00000332592 | ENSP00000348442 |
| ENSP00000332592 | ENSP00000358695 |
| ENSP00000332592 | ENSP00000360473 |
| ENSP00000332592 | ENSP00000365811 |
| ENSP00000332592 | ENSP00000367486 |
| ENSP00000332592 | ENSP00000374566 |
| ENSP00000332592 | ENSP00000376410 |
| ENSP00000332592 | ENSP00000397351 |
| ENSP00000332624 | ENSP00000357051 |
| ENSP00000332681 | ENSP00000343885 |
| ENSP00000332681 | ENSP00000349465 |
| ENSP00000332681 | ENSP00000362762 |
| ENSP00000332721 | ENSP00000342032 |
| ENSP00000332721 | ENSP00000356632 |
| ENSP00000332721 | ENSP00000394085 |
| ENSP00000332887 | ENSP00000348886 |
| ENSP00000332887 | ENSP00000349142 |
| ENSP00000332887 | ENSP00000354499 |
| ENSP00000332887 | ENSP00000354554 |
| ENSP00000332887 | ENSP00000354876 |
| ENSP00000332887 | ENSP00000354982 |
| ENSP00000332887 | ENSP00000355572 |
| ENSP00000332887 | ENSP00000361686 |
| ENSP00000332887 | ENSP00000362255 |

|                 |                 |
|-----------------|-----------------|
| ENSP00000332887 | ENSP00000367934 |
| ENSP00000332887 | ENSP00000386918 |
| ENSP00000332887 | ENSP00000409275 |
| ENSP00000332931 | ENSP00000368253 |
| ENSP00000332931 | ENSP00000378306 |
| ENSP00000332931 | ENSP00000380349 |
| ENSP00000332979 | ENSP00000337838 |
| ENSP00000332979 | ENSP00000344106 |
| ENSP00000332995 | ENSP00000355958 |
| ENSP00000332995 | ENSP00000362592 |
| ENSP00000332995 | ENSP00000368438 |
| ENSP00000332995 | ENSP00000371475 |
| ENSP00000332995 | ENSP00000374280 |
| ENSP00000332995 | ENSP00000378529 |
| ENSP00000332995 | ENSP00000381840 |
| ENSP00000333019 | ENSP00000345917 |
| ENSP00000333019 | ENSP00000356146 |
| ENSP00000333019 | ENSP00000360532 |
| ENSP00000333019 | ENSP00000367615 |
| ENSP00000333019 | ENSP00000369456 |
| ENSP00000333122 | ENSP00000362127 |
| ENSP00000333122 | ENSP00000413720 |
| ENSP00000333253 | ENSP00000379607 |
| ENSP00000333255 | ENSP00000358777 |
| ENSP00000333255 | ENSP00000367697 |
| ENSP00000333255 | ENSP00000369513 |
| ENSP00000333275 | ENSP00000333633 |
| ENSP00000333275 | ENSP00000349049 |
| ENSP00000333275 | ENSP00000349748 |
| ENSP00000333275 | ENSP00000352516 |
| ENSP00000333275 | ENSP00000353622 |
| ENSP00000333275 | ENSP00000356331 |
| ENSP00000333275 | ENSP00000362592 |
| ENSP00000333283 | ENSP00000367808 |
| ENSP00000333283 | ENSP00000367910 |
| ENSP00000333283 | ENSP00000373952 |
| ENSP00000333283 | ENSP00000385021 |
| ENSP00000333292 | ENSP00000363708 |
| ENSP00000333298 | ENSP00000346130 |
| ENSP00000333298 | ENSP00000348163 |
| ENSP00000333298 | ENSP00000378368 |
| ENSP00000333298 | ENSP00000417764 |
| ENSP00000333376 | ENSP00000341551 |
| ENSP00000333376 | ENSP00000352121 |
| ENSP00000333376 | ENSP00000356146 |
| ENSP00000333376 | ENSP00000364486 |

|                 |                 |
|-----------------|-----------------|
| ENSP00000333376 | ENSP00000364794 |
| ENSP00000333376 | ENSP00000370258 |
| ENSP00000333376 | ENSP00000380460 |
| ENSP00000333401 | ENSP00000370718 |
| ENSP00000333401 | ENSP00000377486 |
| ENSP00000333401 | ENSP00000380453 |
| ENSP00000333401 | ENSP00000408058 |
| ENSP00000333401 | ENSP00000417602 |
| ENSP00000333537 | ENSP00000381031 |
| ENSP00000333537 | ENSP00000384109 |
| ENSP00000333551 | ENSP00000359518 |
| ENSP00000333551 | ENSP00000361699 |
| ENSP00000333551 | ENSP00000362576 |
| ENSP00000333568 | ENSP00000350512 |
| ENSP00000333568 | ENSP00000364898 |
| ENSP00000333591 | ENSP00000336724 |
| ENSP00000333633 | ENSP00000340278 |
| ENSP00000333633 | ENSP00000342300 |
| ENSP00000333633 | ENSP00000343741 |
| ENSP00000333633 | ENSP00000349049 |
| ENSP00000333633 | ENSP00000349723 |
| ENSP00000333633 | ENSP00000352514 |
| ENSP00000333633 | ENSP00000352516 |
| ENSP00000333633 | ENSP00000353622 |
| ENSP00000333633 | ENSP00000362592 |
| ENSP00000333633 | ENSP00000369716 |
| ENSP00000333633 | ENSP00000384179 |
| ENSP00000333633 | ENSP00000392028 |
| ENSP00000333633 | ENSP00000414187 |
| ENSP00000333633 | ENSP00000417281 |
| ENSP00000333633 | ENSP00000417763 |
| ENSP00000333656 | ENSP00000358997 |
| ENSP00000333656 | ENSP00000363089 |
| ENSP00000333666 | ENSP00000340836 |
| ENSP00000333666 | ENSP00000341243 |
| ENSP00000333667 | ENSP00000340019 |
| ENSP00000333667 | ENSP00000343412 |
| ENSP00000333667 | ENSP00000343557 |
| ENSP00000333667 | ENSP00000352408 |
| ENSP00000333667 | ENSP00000352928 |
| ENSP00000333667 | ENSP00000355011 |
| ENSP00000333667 | ENSP00000356290 |
| ENSP00000333667 | ENSP00000359345 |
| ENSP00000333667 | ENSP00000360141 |
| ENSP00000333667 | ENSP00000360532 |
| ENSP00000333667 | ENSP00000360938 |



|                 |                 |
|-----------------|-----------------|
| ENSP00000333667 | ENSP00000362334 |
| ENSP00000333667 | ENSP00000362344 |
| ENSP00000333667 | ENSP00000363559 |
| ENSP00000333667 | ENSP00000365025 |
| ENSP00000333667 | ENSP00000365773 |
| ENSP00000333667 | ENSP00000368438 |
| ENSP00000333667 | ENSP00000373404 |
| ENSP00000333667 | ENSP00000377617 |
| ENSP00000333667 | ENSP00000379607 |
| ENSP00000333667 | ENSP00000387262 |
| ENSP00000333667 | ENSP00000393953 |
| ENSP00000333667 | ENSP00000397598 |
| ENSP00000333680 | ENSP00000364898 |
| ENSP00000333813 | ENSP00000348877 |
| ENSP00000333813 | ENSP00000356530 |
| ENSP00000333813 | ENSP00000360149 |
| ENSP00000333813 | ENSP00000360644 |
| ENSP00000333813 | ENSP00000362413 |
| ENSP00000333813 | ENSP00000364188 |
| ENSP00000333813 | ENSP00000368646 |
| ENSP00000333813 | ENSP00000375730 |
| ENSP00000333813 | ENSP00000380793 |
| ENSP00000333813 | ENSP00000401445 |
| ENSP00000333833 | ENSP00000373404 |
| ENSP00000333836 | ENSP00000354957 |
| ENSP00000333836 | ENSP00000357907 |
| ENSP00000333836 | ENSP00000360412 |
| ENSP00000333836 | ENSP00000366565 |
| ENSP00000333836 | ENSP00000396704 |
| ENSP00000333837 | ENSP00000336702 |
| ENSP00000333837 | ENSP00000353332 |
| ENSP00000333837 | ENSP00000354525 |
| ENSP00000333837 | ENSP00000354739 |
| ENSP00000333837 | ENSP00000357748 |
| ENSP00000333837 | ENSP00000363384 |
| ENSP00000333837 | ENSP00000373404 |
| ENSP00000333837 | ENSP00000373715 |
| ENSP00000333837 | ENSP00000375730 |
| ENSP00000333837 | ENSP00000377486 |
| ENSP00000333837 | ENSP00000379607 |
| ENSP00000333837 | ENSP00000387262 |
| ENSP00000333873 | ENSP00000341189 |
| ENSP00000333873 | ENSP00000343479 |
| ENSP00000333873 | ENSP00000349959 |
| ENSP00000333873 | ENSP00000351908 |
| ENSP00000333873 | ENSP00000365891 |

|                 |                 |
|-----------------|-----------------|
| ENSP00000333873 | ENSP00000366135 |
| ENSP00000333873 | ENSP00000368140 |
| ENSP00000333919 | ENSP00000340944 |
| ENSP00000333919 | ENSP00000347948 |
| ENSP00000333919 | ENSP00000348307 |
| ENSP00000333919 | ENSP00000358470 |
| ENSP00000333920 | ENSP00000338533 |
| ENSP00000333920 | ENSP00000347733 |
| ENSP00000333920 | ENSP00000349213 |
| ENSP00000333920 | ENSP00000353622 |
| ENSP00000333920 | ENSP00000354522 |
| ENSP00000333920 | ENSP00000355153 |
| ENSP00000333920 | ENSP00000361465 |
| ENSP00000333920 | ENSP00000367029 |
| ENSP00000333920 | ENSP00000371236 |
| ENSP00000333920 | ENSP00000378350 |
| ENSP00000333920 | ENSP00000396704 |
| ENSP00000333920 | ENSP00000397644 |
| ENSP00000333920 | ENSP00000417281 |
| ENSP00000333934 | ENSP00000356476 |
| ENSP00000333934 | ENSP00000366519 |
| ENSP00000333934 | ENSP00000371201 |
| ENSP00000333934 | ENSP00000374219 |
| ENSP00000333934 | ENSP00000382392 |
| ENSP00000333934 | ENSP00000388464 |
| ENSP00000333934 | ENSP00000419740 |
| ENSP00000333946 | ENSP00000340019 |
| ENSP00000333946 | ENSP00000341662 |
| ENSP00000333946 | ENSP00000349078 |
| ENSP00000333946 | ENSP00000353622 |
| ENSP00000333946 | ENSP00000355739 |
| ENSP00000333946 | ENSP00000355890 |
| ENSP00000333946 | ENSP00000356257 |
| ENSP00000333946 | ENSP00000356723 |
| ENSP00000333946 | ENSP00000358033 |
| ENSP00000333946 | ENSP00000359385 |
| ENSP00000333946 | ENSP00000360327 |
| ENSP00000333946 | ENSP00000360918 |
| ENSP00000333946 | ENSP00000365388 |
| ENSP00000333946 | ENSP00000368439 |
| ENSP00000333946 | ENSP00000401508 |
| ENSP00000333946 | ENSP00000414670 |
| ENSP00000333947 | ENSP00000358423 |
| ENSP00000333950 | ENSP00000334100 |
| ENSP00000333950 | ENSP00000346886 |
| ENSP00000333950 | ENSP00000348215 |

|                 |                 |
|-----------------|-----------------|
| ENSP00000333950 | ENSP00000348349 |
| ENSP00000333950 | ENSP00000348965 |
| ENSP00000333950 | ENSP00000351333 |
| ENSP00000333950 | ENSP00000351665 |
| ENSP00000333950 | ENSP00000357998 |
| ENSP00000333950 | ENSP00000359552 |
| ENSP00000333950 | ENSP00000360076 |
| ENSP00000333950 | ENSP00000360183 |
| ENSP00000333950 | ENSP00000365891 |
| ENSP00000333950 | ENSP00000366121 |
| ENSP00000333950 | ENSP00000370589 |
| ENSP00000333950 | ENSP00000373347 |
| ENSP00000333950 | ENSP00000377793 |
| ENSP00000333950 | ENSP00000380450 |
| ENSP00000333950 | ENSP00000381567 |
| ENSP00000333950 | ENSP00000391249 |
| ENSP00000333950 | ENSP00000393275 |
| ENSP00000333950 | ENSP00000397598 |
| ENSP00000333950 | ENSP00000402084 |
| ENSP00000333950 | ENSP00000407879 |
| ENSP00000333950 | ENSP00000414402 |
| ENSP00000333950 | ENSP00000418661 |
| ENSP00000334002 | ENSP00000347184 |
| ENSP00000334002 | ENSP00000354791 |
| ENSP00000334002 | ENSP00000356774 |
| ENSP00000334002 | ENSP00000358778 |
| ENSP00000334002 | ENSP00000361949 |
| ENSP00000334002 | ENSP00000378180 |
| ENSP00000334002 | ENSP00000378338 |
| ENSP00000334002 | ENSP00000381098 |
| ENSP00000334002 | ENSP00000387262 |
| ENSP00000334044 | ENSP00000340879 |
| ENSP00000334044 | ENSP00000349016 |
| ENSP00000334044 | ENSP00000352400 |
| ENSP00000334044 | ENSP00000356104 |
| ENSP00000334044 | ENSP00000361845 |
| ENSP00000334044 | ENSP00000376758 |
| ENSP00000334044 | ENSP00000377040 |
| ENSP00000334044 | ENSP00000377914 |
| ENSP00000334044 | ENSP00000383719 |
| ENSP00000334052 | ENSP00000350263 |
| ENSP00000334052 | ENSP00000360149 |
| ENSP00000334052 | ENSP00000360644 |
| ENSP00000334061 | ENSP00000336842 |
| ENSP00000334061 | ENSP00000337340 |
| ENSP00000334061 | ENSP00000337464 |

|                 |                 |
|-----------------|-----------------|
| ENSP00000334061 | ENSP00000338157 |
| ENSP00000334061 | ENSP00000339527 |
| ENSP00000334061 | ENSP00000340820 |
| ENSP00000334061 | ENSP00000343745 |
| ENSP00000334061 | ENSP00000344456 |
| ENSP00000334061 | ENSP00000347733 |
| ENSP00000334061 | ENSP00000347836 |
| ENSP00000334061 | ENSP00000349213 |
| ENSP00000334061 | ENSP00000350767 |
| ENSP00000334061 | ENSP00000351284 |
| ENSP00000334061 | ENSP00000352257 |
| ENSP00000334061 | ENSP00000352514 |
| ENSP00000334061 | ENSP00000352516 |
| ENSP00000334061 | ENSP00000353622 |
| ENSP00000334061 | ENSP00000353785 |
| ENSP00000334061 | ENSP00000354791 |
| ENSP00000334061 | ENSP00000355205 |
| ENSP00000334061 | ENSP00000355260 |
| ENSP00000334061 | ENSP00000355865 |
| ENSP00000334061 | ENSP00000357341 |
| ENSP00000334061 | ENSP00000357887 |
| ENSP00000334061 | ENSP00000359034 |
| ENSP00000334061 | ENSP00000361557 |
| ENSP00000334061 | ENSP00000362306 |
| ENSP00000334061 | ENSP00000363779 |
| ENSP00000334061 | ENSP00000364293 |
| ENSP00000334061 | ENSP00000364898 |
| ENSP00000334061 | ENSP00000366249 |
| ENSP00000334061 | ENSP00000367299 |
| ENSP00000334061 | ENSP00000367705 |
| ENSP00000334061 | ENSP00000369757 |
| ENSP00000334061 | ENSP00000371607 |
| ENSP00000334061 | ENSP00000374213 |
| ENSP00000334061 | ENSP00000374455 |
| ENSP00000334061 | ENSP00000375986 |
| ENSP00000334061 | ENSP00000380460 |
| ENSP00000334061 | ENSP00000383986 |
| ENSP00000334061 | ENSP00000417190 |
| ENSP00000334061 | ENSP00000417602 |
| ENSP00000334061 | ENSP00000420357 |
| ENSP00000334100 | ENSP00000340836 |
| ENSP00000334100 | ENSP00000341680 |
| ENSP00000334100 | ENSP00000346139 |
| ENSP00000334100 | ENSP00000348215 |
| ENSP00000334100 | ENSP00000348602 |
| ENSP00000334100 | ENSP00000353564 |

|                 |                 |
|-----------------|-----------------|
| ENSP00000334100 | ENSP00000353701 |
| ENSP00000334100 | ENSP00000355596 |
| ENSP00000334100 | ENSP00000355629 |
| ENSP00000334100 | ENSP00000355721 |
| ENSP00000334100 | ENSP00000358059 |
| ENSP00000334100 | ENSP00000360464 |
| ENSP00000334100 | ENSP00000360532 |
| ENSP00000334100 | ENSP00000362105 |
| ENSP00000334100 | ENSP00000362399 |
| ENSP00000334100 | ENSP00000365630 |
| ENSP00000334100 | ENSP00000369409 |
| ENSP00000334100 | ENSP00000377665 |
| ENSP00000334100 | ENSP00000378736 |
| ENSP00000334100 | ENSP00000380450 |
| ENSP00000334100 | ENSP00000382177 |
| ENSP00000334100 | ENSP00000382492 |
| ENSP00000334100 | ENSP00000386156 |
| ENSP00000334100 | ENSP00000389934 |
| ENSP00000334100 | ENSP00000390783 |
| ENSP00000334130 | ENSP00000340896 |
| ENSP00000334130 | ENSP00000353622 |
| ENSP00000334130 | ENSP00000369497 |
| ENSP00000334130 | ENSP00000418734 |
| ENSP00000334140 | ENSP00000343535 |
| ENSP00000334140 | ENSP00000347626 |
| ENSP00000334145 | ENSP00000348307 |
| ENSP00000334145 | ENSP00000364709 |
| ENSP00000334148 | ENSP00000335321 |
| ENSP00000334148 | ENSP00000340019 |
| ENSP00000334148 | ENSP00000341885 |
| ENSP00000334148 | ENSP00000342374 |
| ENSP00000334148 | ENSP00000343557 |
| ENSP00000334148 | ENSP00000348010 |
| ENSP00000334148 | ENSP00000349959 |
| ENSP00000334148 | ENSP00000351137 |
| ENSP00000334148 | ENSP00000351492 |
| ENSP00000334148 | ENSP00000356541 |
| ENSP00000334148 | ENSP00000356652 |
| ENSP00000334148 | ENSP00000357631 |
| ENSP00000334148 | ENSP00000358554 |
| ENSP00000334148 | ENSP00000360116 |
| ENSP00000334148 | ENSP00000360497 |
| ENSP00000334148 | ENSP00000360532 |
| ENSP00000334148 | ENSP00000361047 |
| ENSP00000334148 | ENSP00000361557 |
| ENSP00000334148 | ENSP00000361577 |

|                 |                 |
|-----------------|-----------------|
| ENSP00000334148 | ENSP00000362110 |
| ENSP00000334148 | ENSP00000362413 |
| ENSP00000334148 | ENSP00000363021 |
| ENSP00000334148 | ENSP00000364289 |
| ENSP00000334148 | ENSP00000366557 |
| ENSP00000334148 | ENSP00000366607 |
| ENSP00000334148 | ENSP00000367835 |
| ENSP00000334148 | ENSP00000368881 |
| ENSP00000334148 | ENSP00000369695 |
| ENSP00000334148 | ENSP00000369887 |
| ENSP00000334148 | ENSP00000376973 |
| ENSP00000334148 | ENSP00000377262 |
| ENSP00000334148 | ENSP00000385903 |
| ENSP00000334148 | ENSP00000387006 |
| ENSP00000334148 | ENSP00000391432 |
| ENSP00000334148 | ENSP00000400591 |
| ENSP00000334148 | ENSP00000412566 |
| ENSP00000334188 | ENSP00000338862 |
| ENSP00000334188 | ENSP00000340019 |
| ENSP00000334188 | ENSP00000347602 |
| ENSP00000334188 | ENSP00000347719 |
| ENSP00000334188 | ENSP00000348107 |
| ENSP00000334188 | ENSP00000348602 |
| ENSP00000334188 | ENSP00000350708 |
| ENSP00000334188 | ENSP00000350967 |
| ENSP00000334188 | ENSP00000353622 |
| ENSP00000334188 | ENSP00000353793 |
| ENSP00000334188 | ENSP00000354522 |
| ENSP00000334188 | ENSP00000355205 |
| ENSP00000334188 | ENSP00000355560 |
| ENSP00000334188 | ENSP00000356989 |
| ENSP00000334188 | ENSP00000357887 |
| ENSP00000334188 | ENSP00000359518 |
| ENSP00000334188 | ENSP00000360065 |
| ENSP00000334188 | ENSP00000360473 |
| ENSP00000334188 | ENSP00000361800 |
| ENSP00000334188 | ENSP00000361845 |
| ENSP00000334188 | ENSP00000362166 |
| ENSP00000334188 | ENSP00000363313 |
| ENSP00000334188 | ENSP00000363734 |
| ENSP00000334188 | ENSP00000364289 |
| ENSP00000334188 | ENSP00000366135 |
| ENSP00000334188 | ENSP00000369736 |
| ENSP00000334188 | ENSP00000369860 |
| ENSP00000334188 | ENSP00000369897 |
| ENSP00000334188 | ENSP00000370719 |

|                 |                 |
|-----------------|-----------------|
| ENSP00000334188 | ENSP00000374213 |
| ENSP00000334188 | ENSP00000376268 |
| ENSP00000334188 | ENSP00000376946 |
| ENSP00000334188 | ENSP00000379888 |
| ENSP00000334188 | ENSP00000382562 |
| ENSP00000334188 | ENSP00000383503 |
| ENSP00000334188 | ENSP00000384290 |
| ENSP00000334188 | ENSP00000386759 |
| ENSP00000334188 | ENSP00000386992 |
| ENSP00000334188 | ENSP00000391944 |
| ENSP00000334188 | ENSP00000397259 |
| ENSP00000334188 | ENSP00000397636 |
| ENSP00000334188 | ENSP00000405636 |
| ENSP00000334188 | ENSP00000406293 |
| ENSP00000334188 | ENSP00000410530 |
| ENSP00000334188 | ENSP00000410954 |
| ENSP00000334188 | ENSP00000414110 |
| ENSP00000334188 | ENSP00000416599 |
| ENSP00000334188 | ENSP00000417229 |
| ENSP00000334229 | ENSP00000344572 |
| ENSP00000334280 | ENSP00000346566 |
| ENSP00000334280 | ENSP00000363812 |
| ENSP00000334474 | ENSP00000343741 |
| ENSP00000334474 | ENSP00000347232 |
| ENSP00000334474 | ENSP00000350249 |
| ENSP00000334474 | ENSP00000351284 |
| ENSP00000334474 | ENSP00000351697 |
| ENSP00000334474 | ENSP00000354522 |
| ENSP00000334474 | ENSP00000361310 |
| ENSP00000334474 | ENSP00000366863 |
| ENSP00000334474 | ENSP00000368349 |
| ENSP00000334474 | ENSP00000368438 |
| ENSP00000334474 | ENSP00000369335 |
| ENSP00000334538 | ENSP00000346634 |
| ENSP00000334538 | ENSP00000349748 |
| ENSP00000334538 | ENSP00000355011 |
| ENSP00000334538 | ENSP00000355759 |
| ENSP00000334538 | ENSP00000359958 |
| ENSP00000334538 | ENSP00000360532 |
| ENSP00000334538 | ENSP00000361640 |
| ENSP00000334538 | ENSP00000361949 |
| ENSP00000334538 | ENSP00000362110 |
| ENSP00000334538 | ENSP00000362820 |
| ENSP00000334538 | ENSP00000362900 |
| ENSP00000334538 | ENSP00000365439 |
| ENSP00000334538 | ENSP00000366829 |

|                 |                 |
|-----------------|-----------------|
| ENSP00000334538 | ENSP00000376309 |
| ENSP00000334538 | ENSP00000416959 |
| ENSP00000334538 | ENSP00000420195 |
| ENSP00000334564 | ENSP00000347345 |
| ENSP00000334564 | ENSP00000348510 |
| ENSP00000334564 | ENSP00000354723 |
| ENSP00000334564 | ENSP00000361180 |
| ENSP00000334564 | ENSP00000361219 |
| ENSP00000334564 | ENSP00000361465 |
| ENSP00000334564 | ENSP00000366828 |
| ENSP00000334564 | ENSP00000368984 |
| ENSP00000334564 | ENSP00000378736 |
| ENSP00000334564 | ENSP00000382058 |
| ENSP00000334564 | ENSP00000403852 |
| ENSP00000334625 | ENSP00000350512 |
| ENSP00000334625 | ENSP00000354340 |
| ENSP00000334625 | ENSP00000360916 |
| ENSP00000334657 | ENSP00000350283 |
| ENSP00000334657 | ENSP00000354201 |
| ENSP00000334657 | ENSP00000360116 |
| ENSP00000334675 | ENSP00000343741 |
| ENSP00000334675 | ENSP00000347232 |
| ENSP00000334675 | ENSP00000348577 |
| ENSP00000334675 | ENSP00000358478 |
| ENSP00000334675 | ENSP00000360532 |
| ENSP00000334675 | ENSP00000360621 |
| ENSP00000334675 | ENSP00000364126 |
| ENSP00000334675 | ENSP00000366135 |
| ENSP00000334675 | ENSP00000366271 |
| ENSP00000334675 | ENSP00000369335 |
| ENSP00000334675 | ENSP00000370150 |
| ENSP00000334675 | ENSP00000402515 |
| ENSP00000334675 | ENSP00000418111 |
| ENSP00000334808 | ENSP00000350767 |
| ENSP00000334808 | ENSP00000355884 |
| ENSP00000334808 | ENSP00000366135 |
| ENSP00000334808 | ENSP00000366249 |
| ENSP00000334813 | ENSP00000372023 |
| ENSP00000334813 | ENSP00000378890 |
| ENSP00000334836 | ENSP00000340896 |
| ENSP00000334836 | ENSP00000347169 |
| ENSP00000334836 | ENSP00000348273 |
| ENSP00000334836 | ENSP00000349213 |
| ENSP00000334836 | ENSP00000349824 |
| ENSP00000334836 | ENSP00000350199 |
| ENSP00000334836 | ENSP00000351926 |



|                 |                 |
|-----------------|-----------------|
| ENSP00000334836 | ENSP00000356272 |
| ENSP00000334836 | ENSP00000359345 |
| ENSP00000334836 | ENSP00000360798 |
| ENSP00000334836 | ENSP00000365891 |
| ENSP00000334836 | ENSP00000375986 |
| ENSP00000334836 | ENSP00000396937 |
| ENSP00000334910 | ENSP00000348554 |
| ENSP00000334910 | ENSP00000351015 |
| ENSP00000334940 | ENSP00000337396 |
| ENSP00000334940 | ENSP00000363582 |
| ENSP00000334940 | ENSP00000385021 |
| ENSP00000334958 | ENSP00000354791 |
| ENSP00000334958 | ENSP00000408910 |
| ENSP00000334958 | ENSP00000414906 |
| ENSP00000335044 | ENSP00000341805 |
| ENSP00000335044 | ENSP00000349213 |
| ENSP00000335044 | ENSP00000351947 |
| ENSP00000335044 | ENSP00000378180 |
| ENSP00000335044 | ENSP00000392028 |
| ENSP00000335044 | ENSP00000396620 |
| ENSP00000335044 | ENSP00000417281 |
| ENSP00000335060 | ENSP00000337688 |
| ENSP00000335062 | ENSP00000340944 |
| ENSP00000335062 | ENSP00000380855 |
| ENSP00000335076 | ENSP00000348455 |
| ENSP00000335144 | ENSP00000352265 |
| ENSP00000335144 | ENSP00000381031 |
| ENSP00000335203 | ENSP00000349142 |
| ENSP00000335203 | ENSP00000370414 |
| ENSP00000335304 | ENSP00000340019 |
| ENSP00000335304 | ENSP00000342056 |
| ENSP00000335304 | ENSP00000346453 |
| ENSP00000335304 | ENSP00000355518 |
| ENSP00000335304 | ENSP00000361287 |
| ENSP00000335304 | ENSP00000364543 |
| ENSP00000335304 | ENSP00000366434 |
| ENSP00000335304 | ENSP00000367923 |
| ENSP00000335304 | ENSP00000370377 |
| ENSP00000335304 | ENSP00000372827 |
| ENSP00000335304 | ENSP00000379607 |
| ENSP00000335304 | ENSP00000380129 |
| ENSP00000335304 | ENSP00000387262 |
| ENSP00000335304 | ENSP00000388872 |
| ENSP00000335304 | ENSP00000390783 |
| ENSP00000335304 | ENSP00000394400 |
| ENSP00000335304 | ENSP00000399530 |

|                 |                 |
|-----------------|-----------------|
| ENSP00000335304 | ENSP00000400626 |
| ENSP00000335304 | ENSP00000412310 |
| ENSP00000335311 | ENSP00000337128 |
| ENSP00000335311 | ENSP00000339191 |
| ENSP00000335311 | ENSP00000350512 |
| ENSP00000335311 | ENSP00000368683 |
| ENSP00000335320 | ENSP00000344456 |
| ENSP00000335321 | ENSP00000337405 |
| ENSP00000335321 | ENSP00000339090 |
| ENSP00000335321 | ENSP00000342374 |
| ENSP00000335321 | ENSP00000342434 |
| ENSP00000335321 | ENSP00000346236 |
| ENSP00000335321 | ENSP00000348010 |
| ENSP00000335321 | ENSP00000351137 |
| ENSP00000335321 | ENSP00000351596 |
| ENSP00000335321 | ENSP00000352308 |
| ENSP00000335321 | ENSP00000353735 |
| ENSP00000335321 | ENSP00000354522 |
| ENSP00000335321 | ENSP00000355013 |
| ENSP00000335321 | ENSP00000356520 |
| ENSP00000335321 | ENSP00000356541 |
| ENSP00000335321 | ENSP00000357631 |
| ENSP00000335321 | ENSP00000358554 |
| ENSP00000335321 | ENSP00000358605 |
| ENSP00000335321 | ENSP00000359454 |
| ENSP00000335321 | ENSP00000360532 |
| ENSP00000335321 | ENSP00000361557 |
| ENSP00000335321 | ENSP00000361577 |
| ENSP00000335321 | ENSP00000362041 |
| ENSP00000335321 | ENSP00000362110 |
| ENSP00000335321 | ENSP00000362824 |
| ENSP00000335321 | ENSP00000362936 |
| ENSP00000335321 | ENSP00000363313 |
| ENSP00000335321 | ENSP00000364813 |
| ENSP00000335321 | ENSP00000366179 |
| ENSP00000335321 | ENSP00000366557 |
| ENSP00000335321 | ENSP00000367208 |
| ENSP00000335321 | ENSP00000368523 |
| ENSP00000335321 | ENSP00000368801 |
| ENSP00000335321 | ENSP00000369218 |
| ENSP00000335321 | ENSP00000370589 |
| ENSP00000335321 | ENSP00000371451 |
| ENSP00000335321 | ENSP00000376309 |
| ENSP00000335321 | ENSP00000378350 |
| ENSP00000335321 | ENSP00000379607 |
| ENSP00000335321 | ENSP00000381932 |

|                 |                 |
|-----------------|-----------------|
| ENSP00000335321 | ENSP00000386161 |
| ENSP00000335321 | ENSP00000387006 |
| ENSP00000335321 | ENSP00000391432 |
| ENSP00000335321 | ENSP00000400591 |
| ENSP00000335321 | ENSP00000412566 |
| ENSP00000335321 | ENSP00000414006 |
| ENSP00000335321 | ENSP00000414634 |
| ENSP00000335321 | ENSP00000416959 |
| ENSP00000335321 | ENSP00000417451 |
| ENSP00000335321 | ENSP00000420195 |
| ENSP00000335357 | ENSP00000342307 |
| ENSP00000335357 | ENSP00000343741 |
| ENSP00000335357 | ENSP00000346566 |
| ENSP00000335357 | ENSP00000351596 |
| ENSP00000335357 | ENSP00000354927 |
| ENSP00000335357 | ENSP00000355153 |
| ENSP00000335357 | ENSP00000355560 |
| ENSP00000335357 | ENSP00000360621 |
| ENSP00000335357 | ENSP00000361465 |
| ENSP00000335357 | ENSP00000362578 |
| ENSP00000335357 | ENSP00000365005 |
| ENSP00000335357 | ENSP00000367029 |
| ENSP00000335357 | ENSP00000371475 |
| ENSP00000335357 | ENSP00000372023 |
| ENSP00000335357 | ENSP00000377793 |
| ENSP00000335357 | ENSP00000382423 |
| ENSP00000335357 | ENSP00000382562 |
| ENSP00000335357 | ENSP00000383503 |
| ENSP00000335357 | ENSP00000397636 |
| ENSP00000335357 | ENSP00000402338 |
| ENSP00000335357 | ENSP00000405636 |
| ENSP00000335357 | ENSP00000410530 |
| ENSP00000335357 | ENSP00000410954 |
| ENSP00000335357 | ENSP00000414110 |
| ENSP00000335357 | ENSP00000416599 |
| ENSP00000335371 | ENSP00000404923 |
| ENSP00000335463 | ENSP00000355944 |
| ENSP00000335463 | ENSP00000360532 |
| ENSP00000335463 | ENSP00000363055 |
| ENSP00000335463 | ENSP00000370557 |
| ENSP00000335463 | ENSP00000384490 |
| ENSP00000335481 | ENSP00000360532 |
| ENSP00000335481 | ENSP00000381022 |
| ENSP00000335493 | ENSP00000361993 |
| ENSP00000335544 | ENSP00000335657 |
| ENSP00000335544 | ENSP00000340944 |

|                 |                 |
|-----------------|-----------------|
| ENSP00000335557 | ENSP00000340879 |
| ENSP00000335808 | ENSP00000370222 |
| ENSP00000336524 | ENSP00000348551 |
| ENSP00000336524 | ENSP00000354720 |
| ENSP00000336524 | ENSP00000355596 |
| ENSP00000336524 | ENSP00000358497 |
| ENSP00000336524 | ENSP00000361824 |
| ENSP00000336524 | ENSP00000364486 |
| ENSP00000336524 | ENSP00000383402 |
| ENSP00000336528 | ENSP00000348551 |
| ENSP00000336528 | ENSP00000351894 |
| ENSP00000336528 | ENSP00000353094 |
| ENSP00000336528 | ENSP00000358777 |
| ENSP00000336528 | ENSP00000363812 |
| ENSP00000336587 | ENSP00000341848 |
| ENSP00000336587 | ENSP00000350094 |
| ENSP00000336587 | ENSP00000350708 |
| ENSP00000336587 | ENSP00000354158 |
| ENSP00000336587 | ENSP00000354486 |
| ENSP00000336587 | ENSP00000355922 |
| ENSP00000336587 | ENSP00000362578 |
| ENSP00000336587 | ENSP00000373331 |
| ENSP00000336606 | ENSP00000336842 |
| ENSP00000336606 | ENSP00000340879 |
| ENSP00000336606 | ENSP00000343190 |
| ENSP00000336606 | ENSP00000343392 |
| ENSP00000336606 | ENSP00000347232 |
| ENSP00000336606 | ENSP00000349393 |
| ENSP00000336606 | ENSP00000351284 |
| ENSP00000336606 | ENSP00000351697 |
| ENSP00000336606 | ENSP00000353793 |
| ENSP00000336606 | ENSP00000354522 |
| ENSP00000336606 | ENSP00000355205 |
| ENSP00000336606 | ENSP00000358478 |
| ENSP00000336606 | ENSP00000360310 |
| ENSP00000336606 | ENSP00000360645 |
| ENSP00000336606 | ENSP00000364289 |
| ENSP00000336606 | ENSP00000365588 |
| ENSP00000336606 | ENSP00000367638 |
| ENSP00000336606 | ENSP00000369335 |
| ENSP00000336606 | ENSP00000369411 |
| ENSP00000336606 | ENSP00000370151 |
| ENSP00000336606 | ENSP00000370410 |
| ENSP00000336606 | ENSP00000371475 |
| ENSP00000336606 | ENSP00000372023 |
| ENSP00000336606 | ENSP00000373060 |

|                 |                 |
|-----------------|-----------------|
| ENSP00000336606 | ENSP00000375809 |
| ENSP00000336606 | ENSP00000378350 |
| ENSP00000336606 | ENSP00000381657 |
| ENSP00000336606 | ENSP00000381795 |
| ENSP00000336606 | ENSP00000384048 |
| ENSP00000336606 | ENSP00000387429 |
| ENSP00000336606 | ENSP00000391457 |
| ENSP00000336606 | ENSP00000394791 |
| ENSP00000336606 | ENSP00000396484 |
| ENSP00000336606 | ENSP00000404318 |
| ENSP00000336606 | ENSP00000409167 |
| ENSP00000336606 | ENSP00000415212 |
| ENSP00000336606 | ENSP00000416511 |
| ENSP00000336606 | ENSP00000420405 |
| ENSP00000336702 | ENSP00000341885 |
| ENSP00000336702 | ENSP00000345156 |
| ENSP00000336702 | ENSP00000346050 |
| ENSP00000336702 | ENSP00000346067 |
| ENSP00000336702 | ENSP00000348215 |
| ENSP00000336702 | ENSP00000352645 |
| ENSP00000336702 | ENSP00000352738 |
| ENSP00000336702 | ENSP00000354125 |
| ENSP00000336702 | ENSP00000356811 |
| ENSP00000336702 | ENSP00000358140 |
| ENSP00000336702 | ENSP00000359345 |
| ENSP00000336702 | ENSP00000359552 |
| ENSP00000336702 | ENSP00000361076 |
| ENSP00000336702 | ENSP00000361949 |
| ENSP00000336702 | ENSP00000362036 |
| ENSP00000336702 | ENSP00000362166 |
| ENSP00000336702 | ENSP00000362744 |
| ENSP00000336702 | ENSP00000364119 |
| ENSP00000336702 | ENSP00000364320 |
| ENSP00000336702 | ENSP00000367029 |
| ENSP00000336702 | ENSP00000368438 |
| ENSP00000336702 | ENSP00000368565 |
| ENSP00000336702 | ENSP00000369897 |
| ENSP00000336702 | ENSP00000373404 |
| ENSP00000336702 | ENSP00000379339 |
| ENSP00000336702 | ENSP00000379607 |
| ENSP00000336702 | ENSP00000388872 |
| ENSP00000336702 | ENSP00000391944 |
| ENSP00000336702 | ENSP00000393241 |
| ENSP00000336702 | ENSP00000403175 |
| ENSP00000336702 | ENSP00000403817 |
| ENSP00000336702 | ENSP00000412583 |

|                 |                 |
|-----------------|-----------------|
| ENSP00000336702 | ENSP00000416110 |
| ENSP00000336702 | ENSP00000420714 |
| ENSP00000336712 | ENSP00000336842 |
| ENSP00000336712 | ENSP00000339095 |
| ENSP00000336712 | ENSP00000340823 |
| ENSP00000336712 | ENSP00000346453 |
| ENSP00000336712 | ENSP00000346725 |
| ENSP00000336712 | ENSP00000348577 |
| ENSP00000336712 | ENSP00000349594 |
| ENSP00000336712 | ENSP00000352400 |
| ENSP00000336712 | ENSP00000354125 |
| ENSP00000336712 | ENSP00000354916 |
| ENSP00000336712 | ENSP00000358563 |
| ENSP00000336712 | ENSP00000359000 |
| ENSP00000336712 | ENSP00000359345 |
| ENSP00000336712 | ENSP00000359688 |
| ENSP00000336712 | ENSP00000360532 |
| ENSP00000336712 | ENSP00000360918 |
| ENSP00000336712 | ENSP00000361982 |
| ENSP00000336712 | ENSP00000364289 |
| ENSP00000336712 | ENSP00000366135 |
| ENSP00000336712 | ENSP00000369042 |
| ENSP00000336712 | ENSP00000370105 |
| ENSP00000336712 | ENSP00000370589 |
| ENSP00000336712 | ENSP00000370741 |
| ENSP00000336712 | ENSP00000373404 |
| ENSP00000336712 | ENSP00000377655 |
| ENSP00000336712 | ENSP00000384675 |
| ENSP00000336712 | ENSP00000386918 |
| ENSP00000336712 | ENSP00000388872 |
| ENSP00000336712 | ENSP00000389103 |
| ENSP00000336712 | ENSP00000394791 |
| ENSP00000336712 | ENSP00000401371 |
| ENSP00000336712 | ENSP00000402527 |
| ENSP00000336712 | ENSP00000417229 |
| ENSP00000336724 | ENSP00000346809 |
| ENSP00000336724 | ENSP00000347408 |
| ENSP00000336724 | ENSP00000352522 |
| ENSP00000336724 | ENSP00000356562 |
| ENSP00000336724 | ENSP00000364486 |
| ENSP00000336724 | ENSP00000365630 |
| ENSP00000336724 | ENSP00000366225 |
| ENSP00000336724 | ENSP00000372720 |
| ENSP00000336724 | ENSP00000376268 |
| ENSP00000336724 | ENSP00000376871 |
| ENSP00000336724 | ENSP00000377769 |

|                 |                 |
|-----------------|-----------------|
| ENSP00000336724 | ENSP00000379372 |
| ENSP00000336724 | ENSP00000397441 |
| ENSP00000336724 | ENSP00000402240 |
| ENSP00000336724 | ENSP00000415203 |
| ENSP00000336740 | ENSP00000348273 |
| ENSP00000336740 | ENSP00000355731 |
| ENSP00000336740 | ENSP00000355865 |
| ENSP00000336740 | ENSP00000363308 |
| ENSP00000336740 | ENSP00000363708 |
| ENSP00000336740 | ENSP00000413720 |
| ENSP00000336750 | ENSP00000337226 |
| ENSP00000336750 | ENSP00000350633 |
| ENSP00000336750 | ENSP00000356433 |
| ENSP00000336750 | ENSP00000359581 |
| ENSP00000336750 | ENSP00000360515 |
| ENSP00000336750 | ENSP00000362068 |
| ENSP00000336752 | ENSP00000339245 |
| ENSP00000336752 | ENSP00000339353 |
| ENSP00000336752 | ENSP00000348010 |
| ENSP00000336752 | ENSP00000355185 |
| ENSP00000336752 | ENSP00000356405 |
| ENSP00000336752 | ENSP00000358576 |
| ENSP00000336752 | ENSP00000365025 |
| ENSP00000336752 | ENSP00000367406 |
| ENSP00000336752 | ENSP00000367527 |
| ENSP00000336752 | ENSP00000378306 |
| ENSP00000336752 | ENSP00000379607 |
| ENSP00000336752 | ENSP00000386161 |
| ENSP00000336752 | ENSP00000398208 |
| ENSP00000336775 | ENSP00000348602 |
| ENSP00000336775 | ENSP00000382064 |
| ENSP00000336790 | ENSP00000340671 |
| ENSP00000336790 | ENSP00000340823 |
| ENSP00000336790 | ENSP00000343701 |
| ENSP00000336790 | ENSP00000344352 |
| ENSP00000336790 | ENSP00000355596 |
| ENSP00000336790 | ENSP00000358105 |
| ENSP00000336790 | ENSP00000359206 |
| ENSP00000336790 | ENSP00000359531 |
| ENSP00000336790 | ENSP00000367265 |
| ENSP00000336790 | ENSP00000369757 |
| ENSP00000336790 | ENSP00000384597 |
| ENSP00000336790 | ENSP00000388035 |
| ENSP00000336790 | ENSP00000417229 |
| ENSP00000336790 | ENSP00000417281 |
| ENSP00000336842 | ENSP00000336856 |

|                 |                 |
|-----------------|-----------------|
| ENSP00000336842 | ENSP00000340271 |
| ENSP00000336842 | ENSP00000340766 |
| ENSP00000336842 | ENSP00000340896 |
| ENSP00000336842 | ENSP00000341243 |
| ENSP00000336842 | ENSP00000345702 |
| ENSP00000336842 | ENSP00000348069 |
| ENSP00000336842 | ENSP00000349640 |
| ENSP00000336842 | ENSP00000350967 |
| ENSP00000336842 | ENSP00000351284 |
| ENSP00000336842 | ENSP00000351947 |
| ENSP00000336842 | ENSP00000353793 |
| ENSP00000336842 | ENSP00000355205 |
| ENSP00000336842 | ENSP00000355261 |
| ENSP00000336842 | ENSP00000362352 |
| ENSP00000336842 | ENSP00000362532 |
| ENSP00000336842 | ENSP00000362592 |
| ENSP00000336842 | ENSP00000363708 |
| ENSP00000336842 | ENSP00000364486 |
| ENSP00000336842 | ENSP00000364929 |
| ENSP00000336842 | ENSP00000366135 |
| ENSP00000336842 | ENSP00000366974 |
| ENSP00000336842 | ENSP00000369411 |
| ENSP00000336842 | ENSP00000369695 |
| ENSP00000336842 | ENSP00000369716 |
| ENSP00000336842 | ENSP00000370151 |
| ENSP00000336842 | ENSP00000372023 |
| ENSP00000336842 | ENSP00000373340 |
| ENSP00000336842 | ENSP00000374213 |
| ENSP00000336842 | ENSP00000377747 |
| ENSP00000336842 | ENSP00000380460 |
| ENSP00000336842 | ENSP00000384198 |
| ENSP00000336842 | ENSP00000391457 |
| ENSP00000336842 | ENSP00000392028 |
| ENSP00000336842 | ENSP00000392617 |
| ENSP00000336842 | ENSP00000397259 |
| ENSP00000336842 | ENSP00000400476 |
| ENSP00000336842 | ENSP00000411409 |
| ENSP00000336842 | ENSP00000420588 |
| ENSP00000336856 | ENSP00000349049 |
| ENSP00000336856 | ENSP00000352257 |
| ENSP00000336856 | ENSP00000352706 |
| ENSP00000336856 | ENSP00000360515 |
| ENSP00000336856 | ENSP00000366030 |
| ENSP00000336856 | ENSP00000366557 |
| ENSP00000336856 | ENSP00000367029 |
| ENSP00000336856 | ENSP00000368439 |



|                 |                 |
|-----------------|-----------------|
| ENSP00000336856 | ENSP00000369757 |
| ENSP00000336856 | ENSP00000374529 |
| ENSP00000336856 | ENSP00000377793 |
| ENSP00000336856 | ENSP00000384597 |
| ENSP00000336856 | ENSP00000396704 |
| ENSP00000336866 | ENSP00000362135 |
| ENSP00000336868 | ENSP00000339030 |
| ENSP00000336868 | ENSP00000342112 |
| ENSP00000336868 | ENSP00000345917 |
| ENSP00000336868 | ENSP00000347733 |
| ENSP00000336868 | ENSP00000348577 |
| ENSP00000336868 | ENSP00000351141 |
| ENSP00000336868 | ENSP00000352257 |
| ENSP00000336868 | ENSP00000353622 |
| ENSP00000336868 | ENSP00000354720 |
| ENSP00000336868 | ENSP00000355205 |
| ENSP00000336868 | ENSP00000355759 |
| ENSP00000336868 | ENSP00000360116 |
| ENSP00000336868 | ENSP00000360621 |
| ENSP00000336868 | ENSP00000362592 |
| ENSP00000336868 | ENSP00000363779 |
| ENSP00000336868 | ENSP00000369075 |
| ENSP00000336868 | ENSP00000369411 |
| ENSP00000336868 | ENSP00000372023 |
| ENSP00000336868 | ENSP00000377007 |
| ENSP00000336868 | ENSP00000377793 |
| ENSP00000336868 | ENSP00000381565 |
| ENSP00000336868 | ENSP00000396439 |
| ENSP00000336868 | ENSP00000414109 |
| ENSP00000336927 | ENSP00000337127 |
| ENSP00000336927 | ENSP00000341551 |
| ENSP00000336927 | ENSP00000342032 |
| ENSP00000336927 | ENSP00000351284 |
| ENSP00000336927 | ENSP00000356470 |
| ENSP00000336927 | ENSP00000362463 |
| ENSP00000336927 | ENSP00000369456 |
| ENSP00000336927 | ENSP00000373952 |
| ENSP00000336927 | ENSP00000379607 |
| ENSP00000336931 | ENSP00000366828 |
| ENSP00000337008 | ENSP00000380718 |
| ENSP00000337053 | ENSP00000343885 |
| ENSP00000337053 | ENSP00000362807 |
| ENSP00000337053 | ENSP00000366395 |
| ENSP00000337053 | ENSP00000366748 |
| ENSP00000337053 | ENSP00000381891 |
| ENSP00000337053 | ENSP00000401445 |

|                 |                 |
|-----------------|-----------------|
| ENSP00000337088 | ENSP00000340896 |
| ENSP00000337088 | ENSP00000344456 |
| ENSP00000337088 | ENSP00000353622 |
| ENSP00000337088 | ENSP00000360455 |
| ENSP00000337088 | ENSP00000363021 |
| ENSP00000337088 | ENSP00000383623 |
| ENSP00000337088 | ENSP00000390475 |
| ENSP00000337127 | ENSP00000341692 |
| ENSP00000337127 | ENSP00000341885 |
| ENSP00000337127 | ENSP00000343741 |
| ENSP00000337127 | ENSP00000346067 |
| ENSP00000337127 | ENSP00000347087 |
| ENSP00000337127 | ENSP00000352021 |
| ENSP00000337127 | ENSP00000352121 |
| ENSP00000337127 | ENSP00000352219 |
| ENSP00000337127 | ENSP00000352706 |
| ENSP00000337127 | ENSP00000354558 |
| ENSP00000337127 | ENSP00000355518 |
| ENSP00000337127 | ENSP00000359100 |
| ENSP00000337127 | ENSP00000359258 |
| ENSP00000337127 | ENSP00000361206 |
| ENSP00000337127 | ENSP00000362036 |
| ENSP00000337127 | ENSP00000362208 |
| ENSP00000337127 | ENSP00000367086 |
| ENSP00000337127 | ENSP00000368605 |
| ENSP00000337127 | ENSP00000370023 |
| ENSP00000337127 | ENSP00000372445 |
| ENSP00000337127 | ENSP00000387262 |
| ENSP00000337127 | ENSP00000393241 |
| ENSP00000337127 | ENSP00000397009 |
| ENSP00000337127 | ENSP00000403175 |
| ENSP00000337127 | ENSP00000412583 |
| ENSP00000337127 | ENSP00000416110 |
| ENSP00000337159 | ENSP00000368818 |
| ENSP00000337163 | ENSP00000367459 |
| ENSP00000337163 | ENSP00000374328 |
| ENSP00000337194 | ENSP00000337340 |
| ENSP00000337194 | ENSP00000339145 |
| ENSP00000337194 | ENSP00000343535 |
| ENSP00000337194 | ENSP00000360532 |
| ENSP00000337194 | ENSP00000363313 |
| ENSP00000337194 | ENSP00000366828 |
| ENSP00000337289 | ENSP00000364737 |
| ENSP00000337340 | ENSP00000339109 |
| ENSP00000337340 | ENSP00000340019 |
| ENSP00000337340 | ENSP00000341382 |

|                 |                 |
|-----------------|-----------------|
| ENSP00000337340 | ENSP00000342343 |
| ENSP00000337340 | ENSP00000346120 |
| ENSP00000337340 | ENSP00000346453 |
| ENSP00000337340 | ENSP00000348577 |
| ENSP00000337340 | ENSP00000348610 |
| ENSP00000337340 | ENSP00000354681 |
| ENSP00000337340 | ENSP00000357047 |
| ENSP00000337340 | ENSP00000357283 |
| ENSP00000337340 | ENSP00000357907 |
| ENSP00000337340 | ENSP00000358716 |
| ENSP00000337340 | ENSP00000359727 |
| ENSP00000337340 | ENSP00000360519 |
| ENSP00000337340 | ENSP00000361232 |
| ENSP00000337340 | ENSP00000362820 |
| ENSP00000337340 | ENSP00000362948 |
| ENSP00000337340 | ENSP00000363193 |
| ENSP00000337340 | ENSP00000370119 |
| ENSP00000337340 | ENSP00000370589 |
| ENSP00000337340 | ENSP00000370968 |
| ENSP00000337340 | ENSP00000372170 |
| ENSP00000337340 | ENSP00000378350 |
| ENSP00000337340 | ENSP00000378503 |
| ENSP00000337340 | ENSP00000382492 |
| ENSP00000337340 | ENSP00000401177 |
| ENSP00000337340 | ENSP00000403852 |
| ENSP00000337340 | ENSP00000406888 |
| ENSP00000337340 | ENSP00000410396 |
| ENSP00000337353 | ENSP00000340879 |
| ENSP00000337353 | ENSP00000347232 |
| ENSP00000337353 | ENSP00000347978 |
| ENSP00000337353 | ENSP00000349393 |
| ENSP00000337353 | ENSP00000351250 |
| ENSP00000337353 | ENSP00000351284 |
| ENSP00000337353 | ENSP00000354522 |
| ENSP00000337353 | ENSP00000358293 |
| ENSP00000337353 | ENSP00000360116 |
| ENSP00000337353 | ENSP00000362656 |
| ENSP00000337353 | ENSP00000364126 |
| ENSP00000337353 | ENSP00000367787 |
| ENSP00000337353 | ENSP00000368686 |
| ENSP00000337353 | ENSP00000369335 |
| ENSP00000337353 | ENSP00000371475 |
| ENSP00000337353 | ENSP00000396704 |
| ENSP00000337353 | ENSP00000400806 |
| ENSP00000337358 | ENSP00000369816 |
| ENSP00000337358 | ENSP00000418661 |

|                 |                 |
|-----------------|-----------------|
| ENSP00000337393 | ENSP00000348128 |
| ENSP00000337393 | ENSP00000354927 |
| ENSP00000337393 | ENSP00000356989 |
| ENSP00000337393 | ENSP00000363734 |
| ENSP00000337393 | ENSP00000376097 |
| ENSP00000337393 | ENSP00000412319 |
| ENSP00000337393 | ENSP00000415678 |
| ENSP00000337396 | ENSP00000344551 |
| ENSP00000337396 | ENSP00000348573 |
| ENSP00000337396 | ENSP00000352572 |
| ENSP00000337396 | ENSP00000355809 |
| ENSP00000337396 | ENSP00000356779 |
| ENSP00000337396 | ENSP00000358212 |
| ENSP00000337396 | ENSP00000360210 |
| ENSP00000337396 | ENSP00000360252 |
| ENSP00000337396 | ENSP00000361254 |
| ENSP00000337396 | ENSP00000370222 |
| ENSP00000337396 | ENSP00000374213 |
| ENSP00000337396 | ENSP00000379607 |
| ENSP00000337396 | ENSP00000399514 |
| ENSP00000337405 | ENSP00000339090 |
| ENSP00000337405 | ENSP00000340271 |
| ENSP00000337405 | ENSP00000340823 |
| ENSP00000337405 | ENSP00000342374 |
| ENSP00000337405 | ENSP00000343741 |
| ENSP00000337405 | ENSP00000344537 |
| ENSP00000337405 | ENSP00000347733 |
| ENSP00000337405 | ENSP00000348010 |
| ENSP00000337405 | ENSP00000348442 |
| ENSP00000337405 | ENSP00000350512 |
| ENSP00000337405 | ENSP00000351947 |
| ENSP00000337405 | ENSP00000353622 |
| ENSP00000337405 | ENSP00000354522 |
| ENSP00000337405 | ENSP00000356405 |
| ENSP00000337405 | ENSP00000356470 |
| ENSP00000337405 | ENSP00000357887 |
| ENSP00000337405 | ENSP00000358064 |
| ENSP00000337405 | ENSP00000358886 |
| ENSP00000337405 | ENSP00000359518 |
| ENSP00000337405 | ENSP00000360515 |
| ENSP00000337405 | ENSP00000360992 |
| ENSP00000337405 | ENSP00000362110 |
| ENSP00000337405 | ENSP00000362532 |
| ENSP00000337405 | ENSP00000363313 |
| ENSP00000337405 | ENSP00000363734 |
| ENSP00000337405 | ENSP00000364289 |

|                 |                 |
|-----------------|-----------------|
| ENSP00000337405 | ENSP00000366135 |
| ENSP00000337405 | ENSP00000368438 |
| ENSP00000337405 | ENSP00000368801 |
| ENSP00000337405 | ENSP00000372023 |
| ENSP00000337405 | ENSP00000372694 |
| ENSP00000337405 | ENSP00000374213 |
| ENSP00000337405 | ENSP00000376973 |
| ENSP00000337405 | ENSP00000382562 |
| ENSP00000337405 | ENSP00000382779 |
| ENSP00000337405 | ENSP00000391944 |
| ENSP00000337405 | ENSP00000402338 |
| ENSP00000337405 | ENSP00000412319 |
| ENSP00000337405 | ENSP00000412566 |
| ENSP00000337405 | ENSP00000415678 |
| ENSP00000337439 | ENSP00000344456 |
| ENSP00000337439 | ENSP00000384490 |
| ENSP00000337443 | ENSP00000357998 |
| ENSP00000337443 | ENSP00000379933 |
| ENSP00000337445 | ENSP00000362171 |
| ENSP00000337445 | ENSP00000363787 |
| ENSP00000337445 | ENSP00000364320 |
| ENSP00000337475 | ENSP00000354522 |
| ENSP00000337475 | ENSP00000356146 |
| ENSP00000337475 | ENSP00000360183 |
| ENSP00000337475 | ENSP00000402240 |
| ENSP00000337475 | ENSP00000409275 |
| ENSP00000337477 | ENSP00000351644 |
| ENSP00000337478 | ENSP00000359000 |
| ENSP00000337478 | ENSP00000360183 |
| ENSP00000337501 | ENSP00000348107 |
| ENSP00000337501 | ENSP00000350708 |
| ENSP00000337501 | ENSP00000355721 |
| ENSP00000337501 | ENSP00000356655 |
| ENSP00000337501 | ENSP00000358147 |
| ENSP00000337501 | ENSP00000360183 |
| ENSP00000337501 | ENSP00000376945 |
| ENSP00000337501 | ENSP00000418734 |
| ENSP00000337513 | ENSP00000354201 |
| ENSP00000337513 | ENSP00000364912 |
| ENSP00000337513 | ENSP00000368801 |
| ENSP00000337513 | ENSP00000399968 |
| ENSP00000337632 | ENSP00000379607 |
| ENSP00000337675 | ENSP00000353701 |
| ENSP00000337675 | ENSP00000357674 |
| ENSP00000337688 | ENSP00000340466 |
| ENSP00000337688 | ENSP00000341538 |

|                 |                 |
|-----------------|-----------------|
| ENSP00000337688 | ENSP00000349877 |
| ENSP00000337688 | ENSP00000357998 |
| ENSP00000337688 | ENSP00000360270 |
| ENSP00000337688 | ENSP00000361845 |
| ENSP00000337688 | ENSP00000366179 |
| ENSP00000337688 | ENSP00000401435 |
| ENSP00000337688 | ENSP00000401445 |
| ENSP00000337736 | ENSP00000339191 |
| ENSP00000337736 | ENSP00000343535 |
| ENSP00000337736 | ENSP00000354125 |
| ENSP00000337736 | ENSP00000356346 |
| ENSP00000337736 | ENSP00000359100 |
| ENSP00000337736 | ENSP00000380702 |
| ENSP00000337736 | ENSP00000417229 |
| ENSP00000337797 | ENSP00000347978 |
| ENSP00000337797 | ENSP00000363095 |
| ENSP00000337797 | ENSP00000368438 |
| ENSP00000337797 | ENSP00000375809 |
| ENSP00000337804 | ENSP00000365811 |
| ENSP00000337838 | ENSP00000342755 |
| ENSP00000337838 | ENSP00000344106 |
| ENSP00000337838 | ENSP00000345656 |
| ENSP00000337838 | ENSP00000348273 |
| ENSP00000337838 | ENSP00000350249 |
| ENSP00000337838 | ENSP00000352522 |
| ENSP00000337838 | ENSP00000355777 |
| ENSP00000337838 | ENSP00000358059 |
| ENSP00000337838 | ENSP00000361845 |
| ENSP00000337838 | ENSP00000363349 |
| ENSP00000337838 | ENSP00000363763 |
| ENSP00000337838 | ENSP00000368135 |
| ENSP00000337838 | ENSP00000368959 |
| ENSP00000337838 | ENSP00000369862 |
| ENSP00000337838 | ENSP00000379933 |
| ENSP00000337838 | ENSP00000385083 |
| ENSP00000337839 | ENSP00000338862 |
| ENSP00000337839 | ENSP00000339095 |
| ENSP00000337839 | ENSP00000345096 |
| ENSP00000337839 | ENSP00000346015 |
| ENSP00000337839 | ENSP00000346050 |
| ENSP00000337839 | ENSP00000346088 |
| ENSP00000337839 | ENSP00000351221 |
| ENSP00000337839 | ENSP00000352706 |
| ENSP00000337839 | ENSP00000356146 |
| ENSP00000337839 | ENSP00000360412 |
| ENSP00000337839 | ENSP00000361076 |

|                 |                 |
|-----------------|-----------------|
| ENSP00000337839 | ENSP00000362413 |
| ENSP00000337839 | ENSP00000362900 |
| ENSP00000337839 | ENSP00000363676 |
| ENSP00000337839 | ENSP00000364289 |
| ENSP00000337839 | ENSP00000364543 |
| ENSP00000337839 | ENSP00000364813 |
| ENSP00000337839 | ENSP00000366519 |
| ENSP00000337839 | ENSP00000366974 |
| ENSP00000337839 | ENSP00000369716 |
| ENSP00000337839 | ENSP00000372827 |
| ENSP00000337839 | ENSP00000372883 |
| ENSP00000337839 | ENSP00000374399 |
| ENSP00000337839 | ENSP00000377640 |
| ENSP00000337839 | ENSP00000377747 |
| ENSP00000337839 | ENSP00000377865 |
| ENSP00000337839 | ENSP00000378160 |
| ENSP00000337839 | ENSP00000378624 |
| ENSP00000337839 | ENSP00000379888 |
| ENSP00000337839 | ENSP00000381045 |
| ENSP00000337839 | ENSP00000382392 |
| ENSP00000337839 | ENSP00000386717 |
| ENSP00000337839 | ENSP00000394400 |
| ENSP00000337839 | ENSP00000399530 |
| ENSP00000337839 | ENSP00000400626 |
| ENSP00000337839 | ENSP00000401371 |
| ENSP00000337839 | ENSP00000403345 |
| ENSP00000337839 | ENSP00000406280 |
| ENSP00000337839 | ENSP00000412310 |
| ENSP00000337839 | ENSP00000414006 |
| ENSP00000337839 | ENSP00000414634 |
| ENSP00000337850 | ENSP00000338067 |
| ENSP00000337850 | ENSP00000366748 |
| ENSP00000337854 | ENSP00000416290 |
| ENSP00000337926 | ENSP00000379607 |
| ENSP00000337946 | ENSP00000367486 |
| ENSP00000338010 | ENSP00000361202 |
| ENSP00000338010 | ENSP00000365016 |
| ENSP00000338093 | ENSP00000340019 |
| ENSP00000338093 | ENSP00000359939 |
| ENSP00000338093 | ENSP00000366135 |
| ENSP00000338093 | ENSP00000376946 |
| ENSP00000338127 | ENSP00000343785 |
| ENSP00000338157 | ENSP00000345681 |
| ENSP00000338157 | ENSP00000348551 |
| ENSP00000338157 | ENSP00000353622 |
| ENSP00000338157 | ENSP00000354927 |

|                 |                 |
|-----------------|-----------------|
| ENSP00000338157 | ENSP00000356602 |
| ENSP00000338157 | ENSP00000360644 |
| ENSP00000338157 | ENSP00000379839 |
| ENSP00000338157 | ENSP00000381891 |
| ENSP00000338165 | ENSP00000360730 |
| ENSP00000338165 | ENSP00000382779 |
| ENSP00000338171 | ENSP00000356346 |
| ENSP00000338171 | ENSP00000358770 |
| ENSP00000338191 | ENSP00000368766 |
| ENSP00000338191 | ENSP00000382064 |
| ENSP00000338235 | ENSP00000345917 |
| ENSP00000338235 | ENSP00000379607 |
| ENSP00000338258 | ENSP00000347345 |
| ENSP00000338293 | ENSP00000360270 |
| ENSP00000338293 | ENSP00000360782 |
| ENSP00000338293 | ENSP00000361845 |
| ENSP00000338293 | ENSP00000387262 |
| ENSP00000338345 | ENSP00000338814 |
| ENSP00000338345 | ENSP00000340278 |
| ENSP00000338345 | ENSP00000340820 |
| ENSP00000338345 | ENSP00000342793 |
| ENSP00000338345 | ENSP00000343313 |
| ENSP00000338345 | ENSP00000345530 |
| ENSP00000338345 | ENSP00000347184 |
| ENSP00000338345 | ENSP00000350199 |
| ENSP00000338345 | ENSP00000353785 |
| ENSP00000338345 | ENSP00000354982 |
| ENSP00000338345 | ENSP00000355865 |
| ENSP00000338345 | ENSP00000361686 |
| ENSP00000338345 | ENSP00000364794 |
| ENSP00000338345 | ENSP00000364898 |
| ENSP00000338345 | ENSP00000369176 |
| ENSP00000338345 | ENSP00000370571 |
| ENSP00000338345 | ENSP00000374455 |
| ENSP00000338345 | ENSP00000381891 |
| ENSP00000338387 | ENSP00000339145 |
| ENSP00000338387 | ENSP00000339845 |
| ENSP00000338387 | ENSP00000343745 |
| ENSP00000338387 | ENSP00000350249 |
| ENSP00000338387 | ENSP00000357836 |
| ENSP00000338387 | ENSP00000362576 |
| ENSP00000338387 | ENSP00000367079 |
| ENSP00000338387 | ENSP00000367439 |
| ENSP00000338413 | ENSP00000344456 |
| ENSP00000338413 | ENSP00000347836 |
| ENSP00000338413 | ENSP00000350718 |



|                 |                 |
|-----------------|-----------------|
| ENSP00000338413 | ENSP00000359939 |
| ENSP00000338413 | ENSP00000359976 |
| ENSP00000338413 | ENSP00000365773 |
| ENSP00000338413 | ENSP00000366249 |
| ENSP00000338413 | ENSP00000368699 |
| ENSP00000338413 | ENSP00000378890 |
| ENSP00000338413 | ENSP00000383719 |
| ENSP00000338413 | ENSP00000393596 |
| ENSP00000338413 | ENSP00000403817 |
| ENSP00000338413 | ENSP00000404705 |
| ENSP00000338533 | ENSP00000349887 |
| ENSP00000338533 | ENSP00000350708 |
| ENSP00000338573 | ENSP00000338862 |
| ENSP00000338573 | ENSP00000339145 |
| ENSP00000338573 | ENSP00000339795 |
| ENSP00000338573 | ENSP00000342181 |
| ENSP00000338573 | ENSP00000346453 |
| ENSP00000338573 | ENSP00000346725 |
| ENSP00000338573 | ENSP00000348596 |
| ENSP00000338573 | ENSP00000352021 |
| ENSP00000338573 | ENSP00000354040 |
| ENSP00000338573 | ENSP00000356290 |
| ENSP00000338573 | ENSP00000358400 |
| ENSP00000338573 | ENSP00000358563 |
| ENSP00000338573 | ENSP00000359345 |
| ENSP00000338573 | ENSP00000359688 |
| ENSP00000338573 | ENSP00000360412 |
| ENSP00000338573 | ENSP00000360828 |
| ENSP00000338573 | ENSP00000361076 |
| ENSP00000338573 | ENSP00000361232 |
| ENSP00000338573 | ENSP00000361982 |
| ENSP00000338573 | ENSP00000362153 |
| ENSP00000338573 | ENSP00000363018 |
| ENSP00000338573 | ENSP00000363384 |
| ENSP00000338573 | ENSP00000363559 |
| ENSP00000338573 | ENSP00000363676 |
| ENSP00000338573 | ENSP00000363985 |
| ENSP00000338573 | ENSP00000364037 |
| ENSP00000338573 | ENSP00000364119 |
| ENSP00000338573 | ENSP00000364320 |
| ENSP00000338573 | ENSP00000366519 |
| ENSP00000338573 | ENSP00000368612 |
| ENSP00000338573 | ENSP00000371201 |
| ENSP00000338573 | ENSP00000371451 |
| ENSP00000338573 | ENSP00000372199 |
| ENSP00000338573 | ENSP00000377640 |

|                 |                 |
|-----------------|-----------------|
| ENSP00000338573 | ENSP00000379888 |
| ENSP00000338573 | ENSP00000380982 |
| ENSP00000338573 | ENSP00000382392 |
| ENSP00000338573 | ENSP00000386717 |
| ENSP00000338573 | ENSP00000388464 |
| ENSP00000338573 | ENSP00000389103 |
| ENSP00000338573 | ENSP00000402338 |
| ENSP00000338573 | ENSP00000417281 |
| ENSP00000338573 | ENSP00000419740 |
| ENSP00000338629 | ENSP00000354995 |
| ENSP00000338629 | ENSP00000358043 |
| ENSP00000338629 | ENSP00000361047 |
| ENSP00000338629 | ENSP00000363812 |
| ENSP00000338629 | ENSP00000364893 |
| ENSP00000338629 | ENSP00000365175 |
| ENSP00000338629 | ENSP00000372703 |
| ENSP00000338629 | ENSP00000387477 |
| ENSP00000338629 | ENSP00000393286 |
| ENSP00000338629 | ENSP00000393870 |
| ENSP00000338629 | ENSP00000400104 |
| ENSP00000338629 | ENSP00000402590 |
| ENSP00000338629 | ENSP00000418210 |
| ENSP00000338703 | ENSP00000339115 |
| ENSP00000338703 | ENSP00000340305 |
| ENSP00000338703 | ENSP00000344460 |
| ENSP00000338703 | ENSP00000344648 |
| ENSP00000338703 | ENSP00000350512 |
| ENSP00000338703 | ENSP00000353698 |
| ENSP00000338703 | ENSP00000354558 |
| ENSP00000338703 | ENSP00000361990 |
| ENSP00000338703 | ENSP00000363944 |
| ENSP00000338703 | ENSP00000367059 |
| ENSP00000338703 | ENSP00000368119 |
| ENSP00000338703 | ENSP00000377527 |
| ENSP00000338703 | ENSP00000418734 |
| ENSP00000338706 | ENSP00000358918 |
| ENSP00000338706 | ENSP00000361287 |
| ENSP00000338706 | ENSP00000367079 |
| ENSP00000338727 | ENSP00000365147 |
| ENSP00000338788 | ENSP00000352738 |
| ENSP00000338788 | ENSP00000359454 |
| ENSP00000338788 | ENSP00000388920 |
| ENSP00000338788 | ENSP00000420357 |
| ENSP00000338799 | ENSP00000338990 |
| ENSP00000338799 | ENSP00000339328 |
| ENSP00000338799 | ENSP00000340944 |

|                 |                 |
|-----------------|-----------------|
| ENSP00000338799 | ENSP00000343412 |
| ENSP00000338799 | ENSP00000348307 |
| ENSP00000338799 | ENSP00000349365 |
| ENSP00000338799 | ENSP00000352121 |
| ENSP00000338799 | ENSP00000355370 |
| ENSP00000338799 | ENSP00000357470 |
| ENSP00000338799 | ENSP00000360916 |
| ENSP00000338799 | ENSP00000381863 |
| ENSP00000338799 | ENSP00000415900 |
| ENSP00000338807 | ENSP00000350249 |
| ENSP00000338814 | ENSP00000355865 |
| ENSP00000338814 | ENSP00000366434 |
| ENSP00000338814 | ENSP00000409279 |
| ENSP00000338862 | ENSP00000339145 |
| ENSP00000338862 | ENSP00000339795 |
| ENSP00000338862 | ENSP00000340281 |
| ENSP00000338862 | ENSP00000345156 |
| ENSP00000338862 | ENSP00000345917 |
| ENSP00000338862 | ENSP00000346022 |
| ENSP00000338862 | ENSP00000346120 |
| ENSP00000338862 | ENSP00000346236 |
| ENSP00000338862 | ENSP00000346725 |
| ENSP00000338862 | ENSP00000348708 |
| ENSP00000338862 | ENSP00000352021 |
| ENSP00000338862 | ENSP00000352678 |
| ENSP00000338862 | ENSP00000354040 |
| ENSP00000338862 | ENSP00000354522 |
| ENSP00000338862 | ENSP00000355899 |
| ENSP00000338862 | ENSP00000356548 |
| ENSP00000338862 | ENSP00000357025 |
| ENSP00000338862 | ENSP00000358716 |
| ENSP00000338862 | ENSP00000358812 |
| ENSP00000338862 | ENSP00000359345 |
| ENSP00000338862 | ENSP00000359518 |
| ENSP00000338862 | ENSP00000359688 |
| ENSP00000338862 | ENSP00000360031 |
| ENSP00000338862 | ENSP00000360412 |
| ENSP00000338862 | ENSP00000360473 |
| ENSP00000338862 | ENSP00000360828 |
| ENSP00000338862 | ENSP00000361076 |
| ENSP00000338862 | ENSP00000361092 |
| ENSP00000338862 | ENSP00000361232 |
| ENSP00000338862 | ENSP00000361949 |
| ENSP00000338862 | ENSP00000362153 |
| ENSP00000338862 | ENSP00000362900 |
| ENSP00000338862 | ENSP00000362936 |

|                 |                 |
|-----------------|-----------------|
| ENSP00000338862 | ENSP00000363018 |
| ENSP00000338862 | ENSP00000363559 |
| ENSP00000338862 | ENSP00000363642 |
| ENSP00000338862 | ENSP00000364037 |
| ENSP00000338862 | ENSP00000364293 |
| ENSP00000338862 | ENSP00000364320 |
| ENSP00000338862 | ENSP00000365806 |
| ENSP00000338862 | ENSP00000365837 |
| ENSP00000338862 | ENSP00000366519 |
| ENSP00000338862 | ENSP00000366557 |
| ENSP00000338862 | ENSP00000368332 |
| ENSP00000338862 | ENSP00000368887 |
| ENSP00000338862 | ENSP00000369038 |
| ENSP00000338862 | ENSP00000370589 |
| ENSP00000338862 | ENSP00000371201 |
| ENSP00000338862 | ENSP00000373090 |
| ENSP00000338862 | ENSP00000375730 |
| ENSP00000338862 | ENSP00000376309 |
| ENSP00000338862 | ENSP00000377640 |
| ENSP00000338862 | ENSP00000377865 |
| ENSP00000338862 | ENSP00000378160 |
| ENSP00000338862 | ENSP00000379607 |
| ENSP00000338862 | ENSP00000379888 |
| ENSP00000338862 | ENSP00000380495 |
| ENSP00000338862 | ENSP00000380982 |
| ENSP00000338862 | ENSP00000382392 |
| ENSP00000338862 | ENSP00000388464 |
| ENSP00000338862 | ENSP00000389103 |
| ENSP00000338862 | ENSP00000394290 |
| ENSP00000338862 | ENSP00000402338 |
| ENSP00000338862 | ENSP00000403576 |
| ENSP00000338862 | ENSP00000409074 |
| ENSP00000338862 | ENSP00000409367 |
| ENSP00000338862 | ENSP00000411162 |
| ENSP00000338862 | ENSP00000413152 |
| ENSP00000338862 | ENSP00000416959 |
| ENSP00000338862 | ENSP00000419740 |
| ENSP00000338862 | ENSP00000420195 |
| ENSP00000338967 | ENSP00000347134 |
| ENSP00000338967 | ENSP00000349959 |
| ENSP00000338967 | ENSP00000370719 |
| ENSP00000338967 | ENSP00000391723 |
| ENSP00000338983 | ENSP00000341141 |
| ENSP00000338983 | ENSP00000344456 |
| ENSP00000338983 | ENSP00000384675 |
| ENSP00000338989 | ENSP00000350249 |

|                 |                 |
|-----------------|-----------------|
| ENSP00000338989 | ENSP00000377496 |
| ENSP00000338990 | ENSP00000339527 |
| ENSP00000338990 | ENSP00000343362 |
| ENSP00000338990 | ENSP00000348565 |
| ENSP00000338990 | ENSP00000349785 |
| ENSP00000338990 | ENSP00000353826 |
| ENSP00000338990 | ENSP00000362413 |
| ENSP00000338990 | ENSP00000362608 |
| ENSP00000338990 | ENSP00000370023 |
| ENSP00000338990 | ENSP00000377954 |
| ENSP00000338990 | ENSP00000394382 |
| ENSP00000338990 | ENSP00000401121 |
| ENSP00000339004 | ENSP00000339527 |
| ENSP00000339004 | ENSP00000341551 |
| ENSP00000339004 | ENSP00000354916 |
| ENSP00000339004 | ENSP00000366534 |
| ENSP00000339030 | ENSP00000355153 |
| ENSP00000339086 | ENSP00000348128 |
| ENSP00000339086 | ENSP00000362717 |
| ENSP00000339090 | ENSP00000348107 |
| ENSP00000339090 | ENSP00000351492 |
| ENSP00000339090 | ENSP00000352678 |
| ENSP00000339090 | ENSP00000355205 |
| ENSP00000339090 | ENSP00000356405 |
| ENSP00000339090 | ENSP00000357631 |
| ENSP00000339090 | ENSP00000357887 |
| ENSP00000339090 | ENSP00000360464 |
| ENSP00000339090 | ENSP00000360532 |
| ENSP00000339090 | ENSP00000361577 |
| ENSP00000339090 | ENSP00000362110 |
| ENSP00000339090 | ENSP00000362900 |
| ENSP00000339090 | ENSP00000362936 |
| ENSP00000339090 | ENSP00000370460 |
| ENSP00000339090 | ENSP00000374213 |
| ENSP00000339090 | ENSP00000376973 |
| ENSP00000339090 | ENSP00000386134 |
| ENSP00000339090 | ENSP00000404151 |
| ENSP00000339090 | ENSP00000417763 |
| ENSP00000339095 | ENSP00000339795 |
| ENSP00000339095 | ENSP00000341885 |
| ENSP00000339095 | ENSP00000345156 |
| ENSP00000339095 | ENSP00000346015 |
| ENSP00000339095 | ENSP00000346022 |
| ENSP00000339095 | ENSP00000346027 |
| ENSP00000339095 | ENSP00000346037 |
| ENSP00000339095 | ENSP00000346050 |

|                 |                 |
|-----------------|-----------------|
| ENSP00000339095 | ENSP00000346067 |
| ENSP00000339095 | ENSP00000350249 |
| ENSP00000339095 | ENSP00000350512 |
| ENSP00000339095 | ENSP00000353741 |
| ENSP00000339095 | ENSP00000354125 |
| ENSP00000339095 | ENSP00000354525 |
| ENSP00000339095 | ENSP00000354673 |
| ENSP00000339095 | ENSP00000354739 |
| ENSP00000339095 | ENSP00000355153 |
| ENSP00000339095 | ENSP00000358140 |
| ENSP00000339095 | ENSP00000359345 |
| ENSP00000339095 | ENSP00000360031 |
| ENSP00000339095 | ENSP00000361076 |
| ENSP00000339095 | ENSP00000362688 |
| ENSP00000339095 | ENSP00000362744 |
| ENSP00000339095 | ENSP00000363018 |
| ENSP00000339095 | ENSP00000363308 |
| ENSP00000339095 | ENSP00000363642 |
| ENSP00000339095 | ENSP00000363676 |
| ENSP00000339095 | ENSP00000363746 |
| ENSP00000339095 | ENSP00000363944 |
| ENSP00000339095 | ENSP00000364119 |
| ENSP00000339095 | ENSP00000369042 |
| ENSP00000339095 | ENSP00000369757 |
| ENSP00000339095 | ENSP00000370589 |
| ENSP00000339095 | ENSP00000371101 |
| ENSP00000339095 | ENSP00000372695 |
| ENSP00000339095 | ENSP00000373404 |
| ENSP00000339095 | ENSP00000375730 |
| ENSP00000339095 | ENSP00000379339 |
| ENSP00000339095 | ENSP00000379607 |
| ENSP00000339095 | ENSP00000379888 |
| ENSP00000339095 | ENSP00000380156 |
| ENSP00000339095 | ENSP00000386717 |
| ENSP00000339095 | ENSP00000389103 |
| ENSP00000339095 | ENSP00000391723 |
| ENSP00000339095 | ENSP00000392270 |
| ENSP00000339095 | ENSP00000393241 |
| ENSP00000339095 | ENSP00000399454 |
| ENSP00000339095 | ENSP00000402338 |
| ENSP00000339095 | ENSP00000402869 |
| ENSP00000339095 | ENSP00000403175 |
| ENSP00000339095 | ENSP00000403817 |
| ENSP00000339095 | ENSP00000405614 |
| ENSP00000339095 | ENSP00000412583 |
| ENSP00000339095 | ENSP00000414321 |

|                 |                 |
|-----------------|-----------------|
| ENSP00000339095 | ENSP00000416110 |
| ENSP00000339095 | ENSP00000417229 |
| ENSP00000339095 | ENSP00000417281 |
| ENSP00000339095 | ENSP00000418734 |
| ENSP00000339095 | ENSP00000419599 |
| ENSP00000339095 | ENSP00000420714 |
| ENSP00000339109 | ENSP00000340954 |
| ENSP00000339109 | ENSP00000341382 |
| ENSP00000339109 | ENSP00000344936 |
| ENSP00000339109 | ENSP00000346987 |
| ENSP00000339109 | ENSP00000348107 |
| ENSP00000339109 | ENSP00000348554 |
| ENSP00000339109 | ENSP00000351947 |
| ENSP00000339109 | ENSP00000360532 |
| ENSP00000339109 | ENSP00000362717 |
| ENSP00000339109 | ENSP00000363322 |
| ENSP00000339109 | ENSP00000367208 |
| ENSP00000339109 | ENSP00000373060 |
| ENSP00000339109 | ENSP00000378350 |
| ENSP00000339109 | ENSP00000378529 |
| ENSP00000339109 | ENSP00000386156 |
| ENSP00000339109 | ENSP00000394394 |
| ENSP00000339115 | ENSP00000362900 |
| ENSP00000339115 | ENSP00000364895 |
| ENSP00000339136 | ENSP00000352121 |
| ENSP00000339145 | ENSP00000339795 |
| ENSP00000339145 | ENSP00000345282 |
| ENSP00000339145 | ENSP00000345917 |
| ENSP00000339145 | ENSP00000346015 |
| ENSP00000339145 | ENSP00000346120 |
| ENSP00000339145 | ENSP00000346173 |
| ENSP00000339145 | ENSP00000346725 |
| ENSP00000339145 | ENSP00000353246 |
| ENSP00000339145 | ENSP00000354040 |
| ENSP00000339145 | ENSP00000354522 |
| ENSP00000339145 | ENSP00000354851 |
| ENSP00000339145 | ENSP00000355759 |
| ENSP00000339145 | ENSP00000355899 |
| ENSP00000339145 | ENSP00000358605 |
| ENSP00000339145 | ENSP00000358812 |
| ENSP00000339145 | ENSP00000359305 |
| ENSP00000339145 | ENSP00000359345 |
| ENSP00000339145 | ENSP00000359688 |
| ENSP00000339145 | ENSP00000360828 |
| ENSP00000339145 | ENSP00000361010 |
| ENSP00000339145 | ENSP00000361092 |

|                 |                 |
|-----------------|-----------------|
| ENSP00000339145 | ENSP00000362153 |
| ENSP00000339145 | ENSP00000363018 |
| ENSP00000339145 | ENSP00000363313 |
| ENSP00000339145 | ENSP00000363559 |
| ENSP00000339145 | ENSP00000363676 |
| ENSP00000339145 | ENSP00000364320 |
| ENSP00000339145 | ENSP00000365806 |
| ENSP00000339145 | ENSP00000366519 |
| ENSP00000339145 | ENSP00000366557 |
| ENSP00000339145 | ENSP00000367064 |
| ENSP00000339145 | ENSP00000368887 |
| ENSP00000339145 | ENSP00000369411 |
| ENSP00000339145 | ENSP00000371201 |
| ENSP00000339145 | ENSP00000372199 |
| ENSP00000339145 | ENSP00000373090 |
| ENSP00000339145 | ENSP00000377640 |
| ENSP00000339145 | ENSP00000379607 |
| ENSP00000339145 | ENSP00000379888 |
| ENSP00000339145 | ENSP00000380156 |
| ENSP00000339145 | ENSP00000380982 |
| ENSP00000339145 | ENSP00000382392 |
| ENSP00000339145 | ENSP00000382779 |
| ENSP00000339145 | ENSP00000384302 |
| ENSP00000339145 | ENSP00000388464 |
| ENSP00000339145 | ENSP00000389103 |
| ENSP00000339145 | ENSP00000394290 |
| ENSP00000339145 | ENSP00000402338 |
| ENSP00000339145 | ENSP00000402935 |
| ENSP00000339145 | ENSP00000403576 |
| ENSP00000339145 | ENSP00000404121 |
| ENSP00000339145 | ENSP00000409074 |
| ENSP00000339145 | ENSP00000409367 |
| ENSP00000339145 | ENSP00000411162 |
| ENSP00000339145 | ENSP00000419740 |
| ENSP00000339186 | ENSP00000350297 |
| ENSP00000339186 | ENSP00000354119 |
| ENSP00000339186 | ENSP00000356186 |
| ENSP00000339186 | ENSP00000356595 |
| ENSP00000339186 | ENSP00000356694 |
| ENSP00000339186 | ENSP00000358081 |
| ENSP00000339186 | ENSP00000360899 |
| ENSP00000339186 | ENSP00000360992 |
| ENSP00000339186 | ENSP00000363250 |
| ENSP00000339186 | ENSP00000364898 |
| ENSP00000339186 | ENSP00000365439 |
| ENSP00000339186 | ENSP00000366936 |



|                 |                 |
|-----------------|-----------------|
| ENSP00000339186 | ENSP00000386621 |
| ENSP00000339186 | ENSP00000399588 |
| ENSP00000339191 | ENSP00000340210 |
| ENSP00000339191 | ENSP00000340944 |
| ENSP00000339191 | ENSP00000341268 |
| ENSP00000339191 | ENSP00000342793 |
| ENSP00000339191 | ENSP00000347979 |
| ENSP00000339191 | ENSP00000353868 |
| ENSP00000339191 | ENSP00000354876 |
| ENSP00000339191 | ENSP00000355001 |
| ENSP00000339191 | ENSP00000356438 |
| ENSP00000339191 | ENSP00000357905 |
| ENSP00000339191 | ENSP00000358997 |
| ENSP00000339191 | ENSP00000360569 |
| ENSP00000339191 | ENSP00000365435 |
| ENSP00000339191 | ENSP00000378368 |
| ENSP00000339191 | ENSP00000380460 |
| ENSP00000339191 | ENSP00000382492 |
| ENSP00000339191 | ENSP00000384675 |
| ENSP00000339245 | ENSP00000339353 |
| ENSP00000339245 | ENSP00000348010 |
| ENSP00000339245 | ENSP00000351811 |
| ENSP00000339245 | ENSP00000358857 |
| ENSP00000339245 | ENSP00000379607 |
| ENSP00000339245 | ENSP00000416097 |
| ENSP00000339245 | ENSP00000416959 |
| ENSP00000339299 | ENSP00000340879 |
| ENSP00000339299 | ENSP00000341189 |
| ENSP00000339299 | ENSP00000348215 |
| ENSP00000339299 | ENSP00000348349 |
| ENSP00000339299 | ENSP00000355167 |
| ENSP00000339299 | ENSP00000355596 |
| ENSP00000339299 | ENSP00000355809 |
| ENSP00000339299 | ENSP00000356595 |
| ENSP00000339299 | ENSP00000360532 |
| ENSP00000339299 | ENSP00000374328 |
| ENSP00000339299 | ENSP00000385545 |
| ENSP00000339328 | ENSP00000349437 |
| ENSP00000339328 | ENSP00000361032 |
| ENSP00000339328 | ENSP00000362095 |
| ENSP00000339353 | ENSP00000345530 |
| ENSP00000339353 | ENSP00000350512 |
| ENSP00000339353 | ENSP00000351947 |
| ENSP00000339353 | ENSP00000354633 |
| ENSP00000339353 | ENSP00000355013 |
| ENSP00000339353 | ENSP00000355051 |

|                 |                 |
|-----------------|-----------------|
| ENSP00000339353 | ENSP00000355185 |
| ENSP00000339353 | ENSP00000356405 |
| ENSP00000339353 | ENSP00000358576 |
| ENSP00000339353 | ENSP00000358854 |
| ENSP00000339353 | ENSP00000364289 |
| ENSP00000339353 | ENSP00000365175 |
| ENSP00000339353 | ENSP00000367406 |
| ENSP00000339353 | ENSP00000367527 |
| ENSP00000339353 | ENSP00000370517 |
| ENSP00000339353 | ENSP00000378306 |
| ENSP00000339353 | ENSP00000379607 |
| ENSP00000339353 | ENSP00000386161 |
| ENSP00000339353 | ENSP00000387477 |
| ENSP00000339353 | ENSP00000398208 |
| ENSP00000339377 | ENSP00000379003 |
| ENSP00000339381 | ENSP00000378529 |
| ENSP00000339435 | ENSP00000340019 |
| ENSP00000339435 | ENSP00000343392 |
| ENSP00000339435 | ENSP00000355890 |
| ENSP00000339435 | ENSP00000364794 |
| ENSP00000339435 | ENSP00000377954 |
| ENSP00000339435 | ENSP00000379093 |
| ENSP00000339449 | ENSP00000357907 |
| ENSP00000339449 | ENSP00000360473 |
| ENSP00000339449 | ENSP00000369497 |
| ENSP00000339449 | ENSP00000386759 |
| ENSP00000339449 | ENSP00000396937 |
| ENSP00000339479 | ENSP00000356785 |
| ENSP00000339479 | ENSP00000370023 |
| ENSP00000339479 | ENSP00000403817 |
| ENSP00000339484 | ENSP00000340879 |
| ENSP00000339484 | ENSP00000349016 |
| ENSP00000339484 | ENSP00000352400 |
| ENSP00000339484 | ENSP00000356104 |
| ENSP00000339484 | ENSP00000361845 |
| ENSP00000339484 | ENSP00000364270 |
| ENSP00000339484 | ENSP00000370737 |
| ENSP00000339484 | ENSP00000376758 |
| ENSP00000339484 | ENSP00000377040 |
| ENSP00000339484 | ENSP00000377865 |
| ENSP00000339484 | ENSP00000377914 |
| ENSP00000339484 | ENSP00000378160 |
| ENSP00000339484 | ENSP00000383719 |
| ENSP00000339495 | ENSP00000342300 |
| ENSP00000339495 | ENSP00000345774 |
| ENSP00000339495 | ENSP00000350283 |

|                 |                 |
|-----------------|-----------------|
| ENSP00000339495 | ENSP00000360532 |
| ENSP00000339495 | ENSP00000364578 |
| ENSP00000339495 | ENSP00000372335 |
| ENSP00000339503 | ENSP00000364212 |
| ENSP00000339503 | ENSP00000379607 |
| ENSP00000339511 | ENSP00000347184 |
| ENSP00000339527 | ENSP00000341551 |
| ENSP00000339527 | ENSP00000342307 |
| ENSP00000339527 | ENSP00000343535 |
| ENSP00000339527 | ENSP00000344456 |
| ENSP00000339527 | ENSP00000349783 |
| ENSP00000339527 | ENSP00000350283 |
| ENSP00000339527 | ENSP00000354916 |
| ENSP00000339527 | ENSP00000359206 |
| ENSP00000339527 | ENSP00000362314 |
| ENSP00000339527 | ENSP00000362413 |
| ENSP00000339527 | ENSP00000370151 |
| ENSP00000339527 | ENSP00000386165 |
| ENSP00000339527 | ENSP00000417281 |
| ENSP00000339529 | ENSP00000341243 |
| ENSP00000339529 | ENSP00000350098 |
| ENSP00000339529 | ENSP00000367439 |
| ENSP00000339529 | ENSP00000369391 |
| ENSP00000339529 | ENSP00000379607 |
| ENSP00000339529 | ENSP00000389182 |
| ENSP00000339529 | ENSP00000403833 |
| ENSP00000339529 | ENSP00000412619 |
| ENSP00000339529 | ENSP00000415046 |
| ENSP00000339587 | ENSP00000360532 |
| ENSP00000339723 | ENSP00000346015 |
| ENSP00000339723 | ENSP00000348551 |
| ENSP00000339723 | ENSP00000358242 |
| ENSP00000339723 | ENSP00000360464 |
| ENSP00000339723 | ENSP00000376534 |
| ENSP00000339795 | ENSP00000341082 |
| ENSP00000339795 | ENSP00000343392 |
| ENSP00000339795 | ENSP00000345156 |
| ENSP00000339795 | ENSP00000346015 |
| ENSP00000339795 | ENSP00000346022 |
| ENSP00000339795 | ENSP00000346027 |
| ENSP00000339795 | ENSP00000346037 |
| ENSP00000339795 | ENSP00000346050 |
| ENSP00000339795 | ENSP00000346088 |
| ENSP00000339795 | ENSP00000346725 |
| ENSP00000339795 | ENSP00000348596 |
| ENSP00000339795 | ENSP00000352021 |

|                 |                 |
|-----------------|-----------------|
| ENSP00000339795 | ENSP00000353246 |
| ENSP00000339795 | ENSP00000354040 |
| ENSP00000339795 | ENSP00000354125 |
| ENSP00000339795 | ENSP00000354558 |
| ENSP00000339795 | ENSP00000354739 |
| ENSP00000339795 | ENSP00000355899 |
| ENSP00000339795 | ENSP00000358400 |
| ENSP00000339795 | ENSP00000358812 |
| ENSP00000339795 | ENSP00000359345 |
| ENSP00000339795 | ENSP00000359688 |
| ENSP00000339795 | ENSP00000360412 |
| ENSP00000339795 | ENSP00000360828 |
| ENSP00000339795 | ENSP00000361076 |
| ENSP00000339795 | ENSP00000362153 |
| ENSP00000339795 | ENSP00000362424 |
| ENSP00000339795 | ENSP00000362744 |
| ENSP00000339795 | ENSP00000363018 |
| ENSP00000339795 | ENSP00000363384 |
| ENSP00000339795 | ENSP00000363559 |
| ENSP00000339795 | ENSP00000363676 |
| ENSP00000339795 | ENSP00000364320 |
| ENSP00000339795 | ENSP00000366519 |
| ENSP00000339795 | ENSP00000366557 |
| ENSP00000339795 | ENSP00000368612 |
| ENSP00000339795 | ENSP00000368887 |
| ENSP00000339795 | ENSP00000369757 |
| ENSP00000339795 | ENSP00000370083 |
| ENSP00000339795 | ENSP00000370589 |
| ENSP00000339795 | ENSP00000371201 |
| ENSP00000339795 | ENSP00000373404 |
| ENSP00000339795 | ENSP00000375730 |
| ENSP00000339795 | ENSP00000377486 |
| ENSP00000339795 | ENSP00000377640 |
| ENSP00000339795 | ENSP00000377865 |
| ENSP00000339795 | ENSP00000378160 |
| ENSP00000339795 | ENSP00000379607 |
| ENSP00000339795 | ENSP00000379888 |
| ENSP00000339795 | ENSP00000380156 |
| ENSP00000339795 | ENSP00000380982 |
| ENSP00000339795 | ENSP00000382392 |
| ENSP00000339795 | ENSP00000386717 |
| ENSP00000339795 | ENSP00000388464 |
| ENSP00000339795 | ENSP00000389103 |
| ENSP00000339795 | ENSP00000393393 |
| ENSP00000339795 | ENSP00000402338 |
| ENSP00000339795 | ENSP00000414321 |

|                 |                 |
|-----------------|-----------------|
| ENSP00000339795 | ENSP00000417229 |
| ENSP00000339795 | ENSP00000419740 |
| ENSP00000339804 | ENSP00000341208 |
| ENSP00000339813 | ENSP00000373614 |
| ENSP00000339826 | ENSP00000340271 |
| ENSP00000339826 | ENSP00000348081 |
| ENSP00000339826 | ENSP00000356331 |
| ENSP00000339826 | ENSP00000356920 |
| ENSP00000339826 | ENSP00000360798 |
| ENSP00000339826 | ENSP00000364898 |
| ENSP00000339826 | ENSP00000365301 |
| ENSP00000339826 | ENSP00000370719 |
| ENSP00000339826 | ENSP00000388320 |
| ENSP00000339826 | ENSP00000392617 |
| ENSP00000339826 | ENSP00000417963 |
| ENSP00000339844 | ENSP00000346067 |
| ENSP00000339844 | ENSP00000346120 |
| ENSP00000339844 | ENSP00000377486 |
| ENSP00000339845 | ENSP00000339933 |
| ENSP00000339845 | ENSP00000346015 |
| ENSP00000339845 | ENSP00000354739 |
| ENSP00000339845 | ENSP00000355185 |
| ENSP00000339845 | ENSP00000355388 |
| ENSP00000339845 | ENSP00000356146 |
| ENSP00000339845 | ENSP00000358576 |
| ENSP00000339845 | ENSP00000358812 |
| ENSP00000339845 | ENSP00000359818 |
| ENSP00000339845 | ENSP00000360310 |
| ENSP00000339845 | ENSP00000361699 |
| ENSP00000339845 | ENSP00000363018 |
| ENSP00000339845 | ENSP00000363676 |
| ENSP00000339845 | ENSP00000366135 |
| ENSP00000339845 | ENSP00000366557 |
| ENSP00000339845 | ENSP00000367029 |
| ENSP00000339845 | ENSP00000367527 |
| ENSP00000339845 | ENSP00000370589 |
| ENSP00000339845 | ENSP00000371169 |
| ENSP00000339845 | ENSP00000373272 |
| ENSP00000339845 | ENSP00000375730 |
| ENSP00000339845 | ENSP00000377486 |
| ENSP00000339845 | ENSP00000379888 |
| ENSP00000339845 | ENSP00000383503 |
| ENSP00000339845 | ENSP00000397636 |
| ENSP00000339845 | ENSP00000405636 |
| ENSP00000339845 | ENSP00000410530 |
| ENSP00000339845 | ENSP00000410954 |

|                 |                 |
|-----------------|-----------------|
| ENSP00000339845 | ENSP00000414110 |
| ENSP00000339845 | ENSP00000416599 |
| ENSP00000339867 | ENSP00000349887 |
| ENSP00000339881 | ENSP00000360286 |
| ENSP00000339881 | ENSP00000365837 |
| ENSP00000339881 | ENSP00000371546 |
| ENSP00000339881 | ENSP00000382779 |
| ENSP00000339881 | ENSP00000386992 |
| ENSP00000339933 | ENSP00000340305 |
| ENSP00000339933 | ENSP00000355013 |
| ENSP00000339933 | ENSP00000355511 |
| ENSP00000339933 | ENSP00000355518 |
| ENSP00000339933 | ENSP00000356405 |
| ENSP00000339933 | ENSP00000357882 |
| ENSP00000339933 | ENSP00000360676 |
| ENSP00000339933 | ENSP00000361465 |
| ENSP00000339933 | ENSP00000362105 |
| ENSP00000339933 | ENSP00000365534 |
| ENSP00000339933 | ENSP00000365663 |
| ENSP00000339933 | ENSP00000368438 |
| ENSP00000339933 | ENSP00000374280 |
| ENSP00000339933 | ENSP00000377527 |
| ENSP00000339933 | ENSP00000379607 |
| ENSP00000339933 | ENSP00000394071 |
| ENSP00000339952 | ENSP00000340944 |
| ENSP00000339952 | ENSP00000343785 |
| ENSP00000339952 | ENSP00000357494 |
| ENSP00000339952 | ENSP00000358770 |
| ENSP00000339952 | ENSP00000361264 |
| ENSP00000339952 | ENSP00000399511 |
| ENSP00000339957 | ENSP00000349892 |
| ENSP00000339957 | ENSP00000359206 |
| ENSP00000339957 | ENSP00000386165 |
| ENSP00000339958 | ENSP00000361202 |
| ENSP00000339958 | ENSP00000365016 |
| ENSP00000339958 | ENSP00000387347 |
| ENSP00000340019 | ENSP00000340879 |
| ENSP00000340019 | ENSP00000341243 |
| ENSP00000340019 | ENSP00000341382 |
| ENSP00000340019 | ENSP00000342087 |
| ENSP00000340019 | ENSP00000344460 |
| ENSP00000340019 | ENSP00000345282 |
| ENSP00000340019 | ENSP00000346022 |
| ENSP00000340019 | ENSP00000346566 |
| ENSP00000340019 | ENSP00000347314 |
| ENSP00000340019 | ENSP00000347495 |

|                 |                 |
|-----------------|-----------------|
| ENSP00000340019 | ENSP00000348395 |
| ENSP00000340019 | ENSP00000348784 |
| ENSP00000340019 | ENSP00000350283 |
| ENSP00000340019 | ENSP00000351284 |
| ENSP00000340019 | ENSP00000352738 |
| ENSP00000340019 | ENSP00000354499 |
| ENSP00000340019 | ENSP00000354720 |
| ENSP00000340019 | ENSP00000355890 |
| ENSP00000340019 | ENSP00000355922 |
| ENSP00000340019 | ENSP00000356953 |
| ENSP00000340019 | ENSP00000356989 |
| ENSP00000340019 | ENSP00000357643 |
| ENSP00000340019 | ENSP00000358022 |
| ENSP00000340019 | ENSP00000358140 |
| ENSP00000340019 | ENSP00000360286 |
| ENSP00000340019 | ENSP00000360412 |
| ENSP00000340019 | ENSP00000360532 |
| ENSP00000340019 | ENSP00000360782 |
| ENSP00000340019 | ENSP00000361287 |
| ENSP00000340019 | ENSP00000361686 |
| ENSP00000340019 | ENSP00000362576 |
| ENSP00000340019 | ENSP00000362869 |
| ENSP00000340019 | ENSP00000363559 |
| ENSP00000340019 | ENSP00000363591 |
| ENSP00000340019 | ENSP00000363676 |
| ENSP00000340019 | ENSP00000363921 |
| ENSP00000340019 | ENSP00000364293 |
| ENSP00000340019 | ENSP00000364320 |
| ENSP00000340019 | ENSP00000364649 |
| ENSP00000340019 | ENSP00000366156 |
| ENSP00000340019 | ENSP00000369757 |
| ENSP00000340019 | ENSP00000370377 |
| ENSP00000340019 | ENSP00000370517 |
| ENSP00000340019 | ENSP00000370737 |
| ENSP00000340019 | ENSP00000373700 |
| ENSP00000340019 | ENSP00000378529 |
| ENSP00000340019 | ENSP00000379607 |
| ENSP00000340019 | ENSP00000382595 |
| ENSP00000340019 | ENSP00000385746 |
| ENSP00000340019 | ENSP00000386722 |
| ENSP00000340019 | ENSP00000387262 |
| ENSP00000340019 | ENSP00000389934 |
| ENSP00000340019 | ENSP00000394085 |
| ENSP00000340019 | ENSP00000394382 |
| ENSP00000340019 | ENSP00000402038 |
| ENSP00000340019 | ENSP00000403852 |

|                 |                 |
|-----------------|-----------------|
| ENSP00000340019 | ENSP00000414321 |
| ENSP00000340093 | ENSP00000354522 |
| ENSP00000340093 | ENSP00000367498 |
| ENSP00000340093 | ENSP00000368140 |
| ENSP00000340093 | ENSP00000417190 |
| ENSP00000340210 | ENSP00000341551 |
| ENSP00000340210 | ENSP00000342156 |
| ENSP00000340210 | ENSP00000358490 |
| ENSP00000340210 | ENSP00000390131 |
| ENSP00000340220 | ENSP00000385722 |
| ENSP00000340237 | ENSP00000340698 |
| ENSP00000340237 | ENSP00000355388 |
| ENSP00000340237 | ENSP00000356674 |
| ENSP00000340237 | ENSP00000359518 |
| ENSP00000340237 | ENSP00000360798 |
| ENSP00000340237 | ENSP00000362029 |
| ENSP00000340237 | ENSP00000365550 |
| ENSP00000340237 | ENSP00000365782 |
| ENSP00000340237 | ENSP00000381631 |
| ENSP00000340237 | ENSP00000387219 |
| ENSP00000340271 | ENSP00000350708 |
| ENSP00000340271 | ENSP00000352257 |
| ENSP00000340271 | ENSP00000355051 |
| ENSP00000340271 | ENSP00000356146 |
| ENSP00000340271 | ENSP00000356405 |
| ENSP00000340271 | ENSP00000358854 |
| ENSP00000340271 | ENSP00000360116 |
| ENSP00000340271 | ENSP00000369695 |
| ENSP00000340271 | ENSP00000374213 |
| ENSP00000340271 | ENSP00000384026 |
| ENSP00000340271 | ENSP00000386759 |
| ENSP00000340271 | ENSP00000397259 |
| ENSP00000340278 | ENSP00000341947 |
| ENSP00000340278 | ENSP00000342026 |
| ENSP00000340278 | ENSP00000352408 |
| ENSP00000340278 | ENSP00000353701 |
| ENSP00000340278 | ENSP00000354522 |
| ENSP00000340278 | ENSP00000355865 |
| ENSP00000340278 | ENSP00000362592 |
| ENSP00000340278 | ENSP00000368790 |
| ENSP00000340278 | ENSP00000377747 |
| ENSP00000340278 | ENSP00000379607 |
| ENSP00000340278 | ENSP00000381863 |
| ENSP00000340278 | ENSP00000396876 |
| ENSP00000340279 | ENSP00000383623 |
| ENSP00000340281 | ENSP00000343081 |



|                 |                 |
|-----------------|-----------------|
| ENSP00000340281 | ENSP00000346453 |
| ENSP00000340281 | ENSP00000348722 |
| ENSP00000340281 | ENSP00000351697 |
| ENSP00000340281 | ENSP00000354522 |
| ENSP00000340281 | ENSP00000355890 |
| ENSP00000340281 | ENSP00000356146 |
| ENSP00000340281 | ENSP00000358140 |
| ENSP00000340281 | ENSP00000358563 |
| ENSP00000340281 | ENSP00000358812 |
| ENSP00000340281 | ENSP00000359688 |
| ENSP00000340281 | ENSP00000360532 |
| ENSP00000340281 | ENSP00000361014 |
| ENSP00000340281 | ENSP00000361982 |
| ENSP00000340281 | ENSP00000362900 |
| ENSP00000340281 | ENSP00000363021 |
| ENSP00000340281 | ENSP00000364119 |
| ENSP00000340281 | ENSP00000364289 |
| ENSP00000340281 | ENSP00000366607 |
| ENSP00000340281 | ENSP00000368349 |
| ENSP00000340281 | ENSP00000368565 |
| ENSP00000340281 | ENSP00000371546 |
| ENSP00000340281 | ENSP00000374213 |
| ENSP00000340281 | ENSP00000402338 |
| ENSP00000340281 | ENSP00000417229 |
| ENSP00000340305 | ENSP00000343745 |
| ENSP00000340305 | ENSP00000347232 |
| ENSP00000340305 | ENSP00000351284 |
| ENSP00000340305 | ENSP00000351697 |
| ENSP00000340305 | ENSP00000355028 |
| ENSP00000340305 | ENSP00000355077 |
| ENSP00000340305 | ENSP00000355941 |
| ENSP00000340305 | ENSP00000356903 |
| ENSP00000340305 | ENSP00000356989 |
| ENSP00000340305 | ENSP00000361310 |
| ENSP00000340305 | ENSP00000363095 |
| ENSP00000340305 | ENSP00000368349 |
| ENSP00000340305 | ENSP00000368438 |
| ENSP00000340305 | ENSP00000369335 |
| ENSP00000340305 | ENSP00000370222 |
| ENSP00000340305 | ENSP00000371475 |
| ENSP00000340305 | ENSP00000380460 |
| ENSP00000340402 | ENSP00000361990 |
| ENSP00000340409 | ENSP00000351885 |
| ENSP00000340409 | ENSP00000354673 |
| ENSP00000340409 | ENSP00000365908 |
| ENSP00000340409 | ENSP00000371152 |

|                 |                 |
|-----------------|-----------------|
| ENSP00000340409 | ENSP00000379607 |
| ENSP00000340427 | ENSP00000367835 |
| ENSP00000340434 | ENSP00000340671 |
| ENSP00000340454 | ENSP00000354560 |
| ENSP00000340454 | ENSP00000359740 |
| ENSP00000340463 | ENSP00000357692 |
| ENSP00000340466 | ENSP00000346809 |
| ENSP00000340466 | ENSP00000348565 |
| ENSP00000340466 | ENSP00000349877 |
| ENSP00000340466 | ENSP00000349970 |
| ENSP00000340466 | ENSP00000353073 |
| ENSP00000340466 | ENSP00000354558 |
| ENSP00000340466 | ENSP00000356346 |
| ENSP00000340466 | ENSP00000356530 |
| ENSP00000340466 | ENSP00000357048 |
| ENSP00000340466 | ENSP00000357998 |
| ENSP00000340466 | ENSP00000364188 |
| ENSP00000340466 | ENSP00000365175 |
| ENSP00000340466 | ENSP00000379042 |
| ENSP00000340466 | ENSP00000387477 |
| ENSP00000340466 | ENSP00000401445 |
| ENSP00000340466 | ENSP00000415203 |
| ENSP00000340466 | ENSP00000415363 |
| ENSP00000340505 | ENSP00000350512 |
| ENSP00000340505 | ENSP00000363676 |
| ENSP00000340505 | ENSP00000384109 |
| ENSP00000340596 | ENSP00000348442 |
| ENSP00000340596 | ENSP00000361207 |
| ENSP00000340596 | ENSP00000362334 |
| ENSP00000340671 | ENSP00000344352 |
| ENSP00000340671 | ENSP00000346050 |
| ENSP00000340671 | ENSP00000353098 |
| ENSP00000340671 | ENSP00000376307 |
| ENSP00000340671 | ENSP00000386165 |
| ENSP00000340684 | ENSP00000359321 |
| ENSP00000340684 | ENSP00000364591 |
| ENSP00000340684 | ENSP00000366156 |
| ENSP00000340684 | ENSP00000385746 |
| ENSP00000340688 | ENSP00000357494 |
| ENSP00000340698 | ENSP00000344055 |
| ENSP00000340698 | ENSP00000358301 |
| ENSP00000340698 | ENSP00000358765 |
| ENSP00000340698 | ENSP00000358994 |
| ENSP00000340698 | ENSP00000359818 |
| ENSP00000340698 | ENSP00000373570 |
| ENSP00000340766 | ENSP00000348708 |

|                 |                 |
|-----------------|-----------------|
| ENSP00000340766 | ENSP00000349016 |
| ENSP00000340766 | ENSP00000351284 |
| ENSP00000340766 | ENSP00000352257 |
| ENSP00000340766 | ENSP00000354673 |
| ENSP00000340766 | ENSP00000355261 |
| ENSP00000340766 | ENSP00000358563 |
| ENSP00000340766 | ENSP00000361577 |
| ENSP00000340766 | ENSP00000380504 |
| ENSP00000340766 | ENSP00000402515 |
| ENSP00000340766 | ENSP00000412566 |
| ENSP00000340796 | ENSP00000379607 |
| ENSP00000340820 | ENSP00000354791 |
| ENSP00000340820 | ENSP00000355865 |
| ENSP00000340820 | ENSP00000355884 |
| ENSP00000340820 | ENSP00000360922 |
| ENSP00000340820 | ENSP00000362399 |
| ENSP00000340820 | ENSP00000362824 |
| ENSP00000340820 | ENSP00000374455 |
| ENSP00000340823 | ENSP00000342121 |
| ENSP00000340823 | ENSP00000342889 |
| ENSP00000340823 | ENSP00000346453 |
| ENSP00000340823 | ENSP00000348168 |
| ENSP00000340823 | ENSP00000351407 |
| ENSP00000340823 | ENSP00000354742 |
| ENSP00000340823 | ENSP00000355560 |
| ENSP00000340823 | ENSP00000356405 |
| ENSP00000340823 | ENSP00000358854 |
| ENSP00000340823 | ENSP00000359531 |
| ENSP00000340823 | ENSP00000365131 |
| ENSP00000340823 | ENSP00000366030 |
| ENSP00000340823 | ENSP00000366915 |
| ENSP00000340823 | ENSP00000369042 |
| ENSP00000340823 | ENSP00000369695 |
| ENSP00000340823 | ENSP00000370105 |
| ENSP00000340823 | ENSP00000376097 |
| ENSP00000340823 | ENSP00000377969 |
| ENSP00000340823 | ENSP00000378350 |
| ENSP00000340823 | ENSP00000386992 |
| ENSP00000340823 | ENSP00000403852 |
| ENSP00000340836 | ENSP00000353564 |
| ENSP00000340836 | ENSP00000353575 |
| ENSP00000340836 | ENSP00000354957 |
| ENSP00000340836 | ENSP00000356694 |
| ENSP00000340836 | ENSP00000357998 |
| ENSP00000340836 | ENSP00000364212 |
| ENSP00000340836 | ENSP00000370083 |

|                 |                 |
|-----------------|-----------------|
| ENSP00000340836 | ENSP00000370119 |
| ENSP00000340836 | ENSP00000381293 |
| ENSP00000340836 | ENSP00000418661 |
| ENSP00000340836 | ENSP00000419628 |
| ENSP00000340864 | ENSP00000367208 |
| ENSP00000340879 | ENSP00000343741 |
| ENSP00000340879 | ENSP00000347232 |
| ENSP00000340879 | ENSP00000349393 |
| ENSP00000340879 | ENSP00000350491 |
| ENSP00000340879 | ENSP00000350785 |
| ENSP00000340879 | ENSP00000351697 |
| ENSP00000340879 | ENSP00000352257 |
| ENSP00000340879 | ENSP00000354522 |
| ENSP00000340879 | ENSP00000355922 |
| ENSP00000340879 | ENSP00000355958 |
| ENSP00000340879 | ENSP00000358478 |
| ENSP00000340879 | ENSP00000360310 |
| ENSP00000340879 | ENSP00000360621 |
| ENSP00000340879 | ENSP00000361467 |
| ENSP00000340879 | ENSP00000363021 |
| ENSP00000340879 | ENSP00000364270 |
| ENSP00000340879 | ENSP00000366249 |
| ENSP00000340879 | ENSP00000367787 |
| ENSP00000340879 | ENSP00000368349 |
| ENSP00000340879 | ENSP00000368438 |
| ENSP00000340879 | ENSP00000368646 |
| ENSP00000340879 | ENSP00000368699 |
| ENSP00000340879 | ENSP00000369038 |
| ENSP00000340879 | ENSP00000369335 |
| ENSP00000340879 | ENSP00000370150 |
| ENSP00000340879 | ENSP00000370151 |
| ENSP00000340879 | ENSP00000371475 |
| ENSP00000340879 | ENSP00000372023 |
| ENSP00000340879 | ENSP00000372857 |
| ENSP00000340879 | ENSP00000373039 |
| ENSP00000340879 | ENSP00000374455 |
| ENSP00000340879 | ENSP00000378288 |
| ENSP00000340879 | ENSP00000378529 |
| ENSP00000340879 | ENSP00000380523 |
| ENSP00000340879 | ENSP00000381657 |
| ENSP00000340879 | ENSP00000386959 |
| ENSP00000340879 | ENSP00000396152 |
| ENSP00000340879 | ENSP00000402084 |
| ENSP00000340879 | ENSP00000410416 |
| ENSP00000340879 | ENSP00000411409 |
| ENSP00000340879 | ENSP00000420270 |

|                 |                 |
|-----------------|-----------------|
| ENSP00000340896 | ENSP00000341280 |
| ENSP00000340896 | ENSP00000344456 |
| ENSP00000340896 | ENSP00000347602 |
| ENSP00000340896 | ENSP00000351894 |
| ENSP00000340896 | ENSP00000352514 |
| ENSP00000340896 | ENSP00000352820 |
| ENSP00000340896 | ENSP00000352821 |
| ENSP00000340896 | ENSP00000353059 |
| ENSP00000340896 | ENSP00000353622 |
| ENSP00000340896 | ENSP00000355205 |
| ENSP00000340896 | ENSP00000356405 |
| ENSP00000340896 | ENSP00000357442 |
| ENSP00000340896 | ENSP00000357887 |
| ENSP00000340896 | ENSP00000357965 |
| ENSP00000340896 | ENSP00000360116 |
| ENSP00000340896 | ENSP00000360515 |
| ENSP00000340896 | ENSP00000364524 |
| ENSP00000340896 | ENSP00000366953 |
| ENSP00000340896 | ENSP00000368686 |
| ENSP00000340896 | ENSP00000373340 |
| ENSP00000340896 | ENSP00000374213 |
| ENSP00000340896 | ENSP00000374280 |
| ENSP00000340896 | ENSP00000374529 |
| ENSP00000340896 | ENSP00000376204 |
| ENSP00000340896 | ENSP00000377265 |
| ENSP00000340896 | ENSP00000384048 |
| ENSP00000340896 | ENSP00000386456 |
| ENSP00000340896 | ENSP00000386759 |
| ENSP00000340896 | ENSP00000390475 |
| ENSP00000340914 | ENSP00000351926 |
| ENSP00000340914 | ENSP00000353362 |
| ENSP00000340914 | ENSP00000368244 |
| ENSP00000340935 | ENSP00000349298 |
| ENSP00000340935 | ENSP00000350199 |
| ENSP00000340935 | ENSP00000393596 |
| ENSP00000340937 | ENSP00000366513 |
| ENSP00000340937 | ENSP00000375829 |
| ENSP00000340944 | ENSP00000341189 |
| ENSP00000340944 | ENSP00000341208 |
| ENSP00000340944 | ENSP00000344456 |
| ENSP00000340944 | ENSP00000345530 |
| ENSP00000340944 | ENSP00000347942 |
| ENSP00000340944 | ENSP00000348307 |
| ENSP00000340944 | ENSP00000349977 |
| ENSP00000340944 | ENSP00000351416 |
| ENSP00000340944 | ENSP00000352121 |

|                 |                 |
|-----------------|-----------------|
| ENSP00000340944 | ENSP00000352513 |
| ENSP00000340944 | ENSP00000353344 |
| ENSP00000340944 | ENSP00000355013 |
| ENSP00000340944 | ENSP00000356405 |
| ENSP00000340944 | ENSP00000356713 |
| ENSP00000340944 | ENSP00000357494 |
| ENSP00000340944 | ENSP00000358301 |
| ENSP00000340944 | ENSP00000360916 |
| ENSP00000340944 | ENSP00000361202 |
| ENSP00000340944 | ENSP00000361548 |
| ENSP00000340944 | ENSP00000361554 |
| ENSP00000340944 | ENSP00000362219 |
| ENSP00000340944 | ENSP00000362399 |
| ENSP00000340944 | ENSP00000363812 |
| ENSP00000340944 | ENSP00000364964 |
| ENSP00000340944 | ENSP00000365016 |
| ENSP00000340944 | ENSP00000369042 |
| ENSP00000340944 | ENSP00000372703 |
| ENSP00000340944 | ENSP00000374280 |
| ENSP00000340944 | ENSP00000375986 |
| ENSP00000340944 | ENSP00000384053 |
| ENSP00000340944 | ENSP00000384675 |
| ENSP00000340944 | ENSP00000393286 |
| ENSP00000340944 | ENSP00000393870 |
| ENSP00000340944 | ENSP00000399588 |
| ENSP00000340944 | ENSP00000400104 |
| ENSP00000340944 | ENSP00000401397 |
| ENSP00000340944 | ENSP00000402590 |
| ENSP00000340944 | ENSP00000406091 |
| ENSP00000340944 | ENSP00000406706 |
| ENSP00000340944 | ENSP00000412361 |
| ENSP00000340954 | ENSP00000356146 |
| ENSP00000340954 | ENSP00000396620 |
| ENSP00000340983 | ENSP00000377496 |
| ENSP00000340995 | ENSP00000354720 |
| ENSP00000340995 | ENSP00000358212 |
| ENSP00000340995 | ENSP00000361707 |
| ENSP00000340995 | ENSP00000365637 |
| ENSP00000340995 | ENSP00000381553 |
| ENSP00000340995 | ENSP00000382562 |
| ENSP00000341024 | ENSP00000344456 |
| ENSP00000341024 | ENSP00000353458 |
| ENSP00000341024 | ENSP00000353622 |
| ENSP00000341024 | ENSP00000353735 |
| ENSP00000341024 | ENSP00000367797 |
| ENSP00000341024 | ENSP00000369716 |

|                 |                 |
|-----------------|-----------------|
| ENSP00000341030 | ENSP00000350512 |
| ENSP00000341030 | ENSP00000366434 |
| ENSP00000341030 | ENSP00000396620 |
| ENSP00000341030 | ENSP00000408020 |
| ENSP00000341082 | ENSP00000341692 |
| ENSP00000341082 | ENSP00000346015 |
| ENSP00000341082 | ENSP00000346022 |
| ENSP00000341082 | ENSP00000354525 |
| ENSP00000341082 | ENSP00000354739 |
| ENSP00000341082 | ENSP00000359345 |
| ENSP00000341082 | ENSP00000363018 |
| ENSP00000341082 | ENSP00000363676 |
| ENSP00000341082 | ENSP00000364320 |
| ENSP00000341082 | ENSP00000373404 |
| ENSP00000341082 | ENSP00000375730 |
| ENSP00000341082 | ENSP00000377486 |
| ENSP00000341082 | ENSP00000377865 |
| ENSP00000341082 | ENSP00000389103 |
| ENSP00000341128 | ENSP00000352257 |
| ENSP00000341138 | ENSP00000360532 |
| ENSP00000341138 | ENSP00000382271 |
| ENSP00000341141 | ENSP00000341637 |
| ENSP00000341141 | ENSP00000353238 |
| ENSP00000341159 | ENSP00000348577 |
| ENSP00000341159 | ENSP00000349959 |
| ENSP00000341159 | ENSP00000351908 |
| ENSP00000341159 | ENSP00000352219 |
| ENSP00000341159 | ENSP00000362298 |
| ENSP00000341159 | ENSP00000369862 |
| ENSP00000341159 | ENSP00000374213 |
| ENSP00000341159 | ENSP00000375986 |
| ENSP00000341159 | ENSP00000403397 |
| ENSP00000341170 | ENSP00000344456 |
| ENSP00000341170 | ENSP00000344468 |
| ENSP00000341170 | ENSP00000347184 |
| ENSP00000341170 | ENSP00000349932 |
| ENSP00000341170 | ENSP00000352608 |
| ENSP00000341170 | ENSP00000358595 |
| ENSP00000341170 | ENSP00000360025 |
| ENSP00000341170 | ENSP00000369716 |
| ENSP00000341170 | ENSP00000373700 |
| ENSP00000341170 | ENSP00000377047 |
| ENSP00000341170 | ENSP00000397435 |
| ENSP00000341189 | ENSP00000347379 |
| ENSP00000341189 | ENSP00000347942 |
| ENSP00000341189 | ENSP00000348602 |

|                 |                 |
|-----------------|-----------------|
| ENSP00000341189 | ENSP00000350297 |
| ENSP00000341189 | ENSP00000355136 |
| ENSP00000341189 | ENSP00000355361 |
| ENSP00000341189 | ENSP00000355759 |
| ENSP00000341189 | ENSP00000360916 |
| ENSP00000341189 | ENSP00000363763 |
| ENSP00000341189 | ENSP00000364898 |
| ENSP00000341189 | ENSP00000376544 |
| ENSP00000341189 | ENSP00000376758 |
| ENSP00000341189 | ENSP00000378338 |
| ENSP00000341189 | ENSP00000380921 |
| ENSP00000341189 | ENSP00000417281 |
| ENSP00000341208 | ENSP00000346839 |
| ENSP00000341208 | ENSP00000348551 |
| ENSP00000341208 | ENSP00000350283 |
| ENSP00000341208 | ENSP00000354782 |
| ENSP00000341208 | ENSP00000364898 |
| ENSP00000341208 | ENSP00000369497 |
| ENSP00000341208 | ENSP00000371308 |
| ENSP00000341208 | ENSP00000374455 |
| ENSP00000341208 | ENSP00000382250 |
| ENSP00000341208 | ENSP00000384053 |
| ENSP00000341208 | ENSP00000386165 |
| ENSP00000341213 | ENSP00000346874 |
| ENSP00000341213 | ENSP00000348965 |
| ENSP00000341213 | ENSP00000360498 |
| ENSP00000341213 | ENSP00000361057 |
| ENSP00000341213 | ENSP00000370930 |
| ENSP00000341213 | ENSP00000386992 |
| ENSP00000341213 | ENSP00000388658 |
| ENSP00000341213 | ENSP00000396771 |
| ENSP00000341243 | ENSP00000341382 |
| ENSP00000341243 | ENSP00000346453 |
| ENSP00000341243 | ENSP00000347345 |
| ENSP00000341243 | ENSP00000347733 |
| ENSP00000341243 | ENSP00000347836 |
| ENSP00000341243 | ENSP00000349213 |
| ENSP00000341243 | ENSP00000350512 |
| ENSP00000341243 | ENSP00000351284 |
| ENSP00000341243 | ENSP00000351575 |
| ENSP00000341243 | ENSP00000351697 |
| ENSP00000341243 | ENSP00000351947 |
| ENSP00000341243 | ENSP00000352257 |
| ENSP00000341243 | ENSP00000354681 |
| ENSP00000341243 | ENSP00000355890 |
| ENSP00000341243 | ENSP00000356448 |



|                 |                 |
|-----------------|-----------------|
| ENSP00000341243 | ENSP00000357048 |
| ENSP00000341243 | ENSP00000358695 |
| ENSP00000341243 | ENSP00000358854 |
| ENSP00000341243 | ENSP00000359290 |
| ENSP00000341243 | ENSP00000360268 |
| ENSP00000341243 | ENSP00000360316 |
| ENSP00000341243 | ENSP00000360782 |
| ENSP00000341243 | ENSP00000360992 |
| ENSP00000341243 | ENSP00000361180 |
| ENSP00000341243 | ENSP00000361219 |
| ENSP00000341243 | ENSP00000361965 |
| ENSP00000341243 | ENSP00000363205 |
| ENSP00000341243 | ENSP00000364794 |
| ENSP00000341243 | ENSP00000365687 |
| ENSP00000341243 | ENSP00000366828 |
| ENSP00000341243 | ENSP00000367923 |
| ENSP00000341243 | ENSP00000368017 |
| ENSP00000341243 | ENSP00000368349 |
| ENSP00000341243 | ENSP00000368438 |
| ENSP00000341243 | ENSP00000368698 |
| ENSP00000341243 | ENSP00000369757 |
| ENSP00000341243 | ENSP00000376611 |
| ENSP00000341243 | ENSP00000378736 |
| ENSP00000341243 | ENSP00000378890 |
| ENSP00000341243 | ENSP00000379372 |
| ENSP00000341243 | ENSP00000380460 |
| ENSP00000341243 | ENSP00000391432 |
| ENSP00000341243 | ENSP00000391457 |
| ENSP00000341243 | ENSP00000392617 |
| ENSP00000341243 | ENSP00000396068 |
| ENSP00000341243 | ENSP00000396704 |
| ENSP00000341243 | ENSP00000410396 |
| ENSP00000341268 | ENSP00000347979 |
| ENSP00000341268 | ENSP00000350785 |
| ENSP00000341268 | ENSP00000363089 |
| ENSP00000341268 | ENSP00000369100 |
| ENSP00000341268 | ENSP00000380921 |
| ENSP00000341268 | ENSP00000381891 |
| ENSP00000341280 | ENSP00000342828 |
| ENSP00000341280 | ENSP00000351947 |
| ENSP00000341280 | ENSP00000357887 |
| ENSP00000341280 | ENSP00000357965 |
| ENSP00000341280 | ENSP00000359321 |
| ENSP00000341280 | ENSP00000362592 |
| ENSP00000341280 | ENSP00000371546 |
| ENSP00000341280 | ENSP00000373340 |

|                 |                 |
|-----------------|-----------------|
| ENSP00000341280 | ENSP00000381840 |
| ENSP00000341280 | ENSP00000404658 |
| ENSP00000341280 | ENSP00000417980 |
| ENSP00000341282 | ENSP00000385122 |
| ENSP00000341351 | ENSP00000352928 |
| ENSP00000341351 | ENSP00000384109 |
| ENSP00000341351 | ENSP00000414321 |
| ENSP00000341382 | ENSP00000343745 |
| ENSP00000341382 | ENSP00000346566 |
| ENSP00000341382 | ENSP00000347345 |
| ENSP00000341382 | ENSP00000347978 |
| ENSP00000341382 | ENSP00000348107 |
| ENSP00000341382 | ENSP00000351284 |
| ENSP00000341382 | ENSP00000352257 |
| ENSP00000341382 | ENSP00000354720 |
| ENSP00000341382 | ENSP00000357047 |
| ENSP00000341382 | ENSP00000360532 |
| ENSP00000341382 | ENSP00000360621 |
| ENSP00000341382 | ENSP00000361180 |
| ENSP00000341382 | ENSP00000362424 |
| ENSP00000341382 | ENSP00000364126 |
| ENSP00000341382 | ENSP00000364293 |
| ENSP00000341382 | ENSP00000368824 |
| ENSP00000341382 | ENSP00000380504 |
| ENSP00000341382 | ENSP00000387262 |
| ENSP00000341382 | ENSP00000395535 |
| ENSP00000341382 | ENSP00000396704 |
| ENSP00000341382 | ENSP00000410088 |
| ENSP00000341538 | ENSP00000353826 |
| ENSP00000341538 | ENSP00000357998 |
| ENSP00000341538 | ENSP00000364188 |
| ENSP00000341538 | ENSP00000386717 |
| ENSP00000341538 | ENSP00000389103 |
| ENSP00000341543 | ENSP00000351380 |
| ENSP00000341551 | ENSP00000344456 |
| ENSP00000341551 | ENSP00000345681 |
| ENSP00000341551 | ENSP00000346127 |
| ENSP00000341551 | ENSP00000346839 |
| ENSP00000341551 | ENSP00000347379 |
| ENSP00000341551 | ENSP00000348395 |
| ENSP00000341551 | ENSP00000350199 |
| ENSP00000341551 | ENSP00000350283 |
| ENSP00000341551 | ENSP00000350467 |
| ENSP00000341551 | ENSP00000350512 |
| ENSP00000341551 | ENSP00000351015 |
| ENSP00000341551 | ENSP00000351250 |

|                 |                 |
|-----------------|-----------------|
| ENSP00000341551 | ENSP00000351490 |
| ENSP00000341551 | ENSP00000352400 |
| ENSP00000341551 | ENSP00000353622 |
| ENSP00000341551 | ENSP00000354201 |
| ENSP00000341551 | ENSP00000354478 |
| ENSP00000341551 | ENSP00000354794 |
| ENSP00000341551 | ENSP00000354919 |
| ENSP00000341551 | ENSP00000356634 |
| ENSP00000341551 | ENSP00000359206 |
| ENSP00000341551 | ENSP00000359211 |
| ENSP00000341551 | ENSP00000360398 |
| ENSP00000341551 | ENSP00000363921 |
| ENSP00000341551 | ENSP00000365567 |
| ENSP00000341551 | ENSP00000366534 |
| ENSP00000341551 | ENSP00000367797 |
| ENSP00000341551 | ENSP00000371875 |
| ENSP00000341551 | ENSP00000374455 |
| ENSP00000341551 | ENSP00000375073 |
| ENSP00000341551 | ENSP00000376611 |
| ENSP00000341551 | ENSP00000377640 |
| ENSP00000341551 | ENSP00000381031 |
| ENSP00000341551 | ENSP00000386165 |
| ENSP00000341551 | ENSP00000386200 |
| ENSP00000341551 | ENSP00000390948 |
| ENSP00000341551 | ENSP00000414187 |
| ENSP00000341610 | ENSP00000356595 |
| ENSP00000341637 | ENSP00000348307 |
| ENSP00000341637 | ENSP00000356991 |
| ENSP00000341637 | ENSP00000372969 |
| ENSP00000341637 | ENSP00000382178 |
| ENSP00000341657 | ENSP00000417281 |
| ENSP00000341658 | ENSP00000364320 |
| ENSP00000341662 | ENSP00000348380 |
| ENSP00000341662 | ENSP00000348762 |
| ENSP00000341662 | ENSP00000355517 |
| ENSP00000341662 | ENSP00000356591 |
| ENSP00000341662 | ENSP00000357775 |
| ENSP00000341662 | ENSP00000358695 |
| ENSP00000341662 | ENSP00000360918 |
| ENSP00000341662 | ENSP00000371236 |
| ENSP00000341662 | ENSP00000379430 |
| ENSP00000341662 | ENSP00000386284 |
| ENSP00000341662 | ENSP00000389934 |
| ENSP00000341679 | ENSP00000349078 |
| ENSP00000341679 | ENSP00000352572 |
| ENSP00000341679 | ENSP00000358033 |

|                 |                 |
|-----------------|-----------------|
| ENSP00000341679 | ENSP00000365388 |
| ENSP00000341679 | ENSP00000365534 |
| ENSP00000341679 | ENSP00000370410 |
| ENSP00000341679 | ENSP00000401508 |
| ENSP00000341680 | ENSP00000354791 |
| ENSP00000341680 | ENSP00000357674 |
| ENSP00000341680 | ENSP00000358742 |
| ENSP00000341680 | ENSP00000362424 |
| ENSP00000341680 | ENSP00000373347 |
| ENSP00000341680 | ENSP00000380598 |
| ENSP00000341680 | ENSP00000382064 |
| ENSP00000341680 | ENSP00000383295 |
| ENSP00000341681 | ENSP00000377372 |
| ENSP00000341692 | ENSP00000347087 |
| ENSP00000341692 | ENSP00000352706 |
| ENSP00000341692 | ENSP00000361206 |
| ENSP00000341692 | ENSP00000362036 |
| ENSP00000341692 | ENSP00000362208 |
| ENSP00000341692 | ENSP00000372445 |
| ENSP00000341692 | ENSP00000379607 |
| ENSP00000341692 | ENSP00000382250 |
| ENSP00000341692 | ENSP00000400312 |
| ENSP00000341698 | ENSP00000354558 |
| ENSP00000341737 | ENSP00000348602 |
| ENSP00000341737 | ENSP00000377148 |
| ENSP00000341743 | ENSP00000350249 |
| ENSP00000341743 | ENSP00000354673 |
| ENSP00000341743 | ENSP00000357602 |
| ENSP00000341743 | ENSP00000368824 |
| ENSP00000341743 | ENSP00000374467 |
| ENSP00000341743 | ENSP00000377496 |
| ENSP00000341743 | ENSP00000388872 |
| ENSP00000341803 | ENSP00000362299 |
| ENSP00000341803 | ENSP00000367841 |
| ENSP00000341805 | ENSP00000344537 |
| ENSP00000341805 | ENSP00000349213 |
| ENSP00000341805 | ENSP00000349393 |
| ENSP00000341805 | ENSP00000354951 |
| ENSP00000341805 | ENSP00000358854 |
| ENSP00000341805 | ENSP00000360916 |
| ENSP00000341805 | ENSP00000361998 |
| ENSP00000341805 | ENSP00000362068 |
| ENSP00000341805 | ENSP00000367406 |
| ENSP00000341805 | ENSP00000378394 |
| ENSP00000341805 | ENSP00000379607 |
| ENSP00000341838 | ENSP00000358737 |

|                 |                 |
|-----------------|-----------------|
| ENSP00000341838 | ENSP00000374443 |
| ENSP00000341838 | ENSP00000389649 |
| ENSP00000341848 | ENSP00000351665 |
| ENSP00000341848 | ENSP00000354791 |
| ENSP00000341848 | ENSP00000355777 |
| ENSP00000341848 | ENSP00000360310 |
| ENSP00000341848 | ENSP00000360492 |
| ENSP00000341848 | ENSP00000360532 |
| ENSP00000341848 | ENSP00000361824 |
| ENSP00000341848 | ENSP00000362656 |
| ENSP00000341848 | ENSP00000368976 |
| ENSP00000341848 | ENSP00000379607 |
| ENSP00000341848 | ENSP00000381657 |
| ENSP00000341848 | ENSP00000382562 |
| ENSP00000341848 | ENSP00000402084 |
| ENSP00000341885 | ENSP00000343081 |
| ENSP00000341885 | ENSP00000345156 |
| ENSP00000341885 | ENSP00000346015 |
| ENSP00000341885 | ENSP00000346027 |
| ENSP00000341885 | ENSP00000346050 |
| ENSP00000341885 | ENSP00000346067 |
| ENSP00000341885 | ENSP00000346725 |
| ENSP00000341885 | ENSP00000348722 |
| ENSP00000341885 | ENSP00000350249 |
| ENSP00000341885 | ENSP00000350491 |
| ENSP00000341885 | ENSP00000354739 |
| ENSP00000341885 | ENSP00000355471 |
| ENSP00000341885 | ENSP00000356134 |
| ENSP00000341885 | ENSP00000358140 |
| ENSP00000341885 | ENSP00000358812 |
| ENSP00000341885 | ENSP00000359976 |
| ENSP00000341885 | ENSP00000360922 |
| ENSP00000341885 | ENSP00000361076 |
| ENSP00000341885 | ENSP00000361699 |
| ENSP00000341885 | ENSP00000362036 |
| ENSP00000341885 | ENSP00000362135 |
| ENSP00000341885 | ENSP00000362744 |
| ENSP00000341885 | ENSP00000363018 |
| ENSP00000341885 | ENSP00000363308 |
| ENSP00000341885 | ENSP00000363676 |
| ENSP00000341885 | ENSP00000364320 |
| ENSP00000341885 | ENSP00000368790 |
| ENSP00000341885 | ENSP00000369757 |
| ENSP00000341885 | ENSP00000370589 |
| ENSP00000341885 | ENSP00000372199 |
| ENSP00000341885 | ENSP00000372445 |

|                 |                 |
|-----------------|-----------------|
| ENSP00000341885 | ENSP00000373404 |
| ENSP00000341885 | ENSP00000379339 |
| ENSP00000341885 | ENSP00000379607 |
| ENSP00000341885 | ENSP00000379888 |
| ENSP00000341885 | ENSP00000393241 |
| ENSP00000341885 | ENSP00000396704 |
| ENSP00000341885 | ENSP00000403175 |
| ENSP00000341885 | ENSP00000412583 |
| ENSP00000341885 | ENSP00000414321 |
| ENSP00000341885 | ENSP00000416110 |
| ENSP00000341885 | ENSP00000420714 |
| ENSP00000341947 | ENSP00000354486 |
| ENSP00000341947 | ENSP00000362592 |
| ENSP00000341947 | ENSP00000368686 |
| ENSP00000341947 | ENSP00000392896 |
| ENSP00000341957 | ENSP00000355231 |
| ENSP00000341957 | ENSP00000361202 |
| ENSP00000341957 | ENSP00000365016 |
| ENSP00000341992 | ENSP00000347087 |
| ENSP00000341992 | ENSP00000360922 |
| ENSP00000341992 | ENSP00000373272 |
| ENSP00000342011 | ENSP00000348602 |
| ENSP00000342011 | ENSP00000349313 |
| ENSP00000342011 | ENSP00000349364 |
| ENSP00000342011 | ENSP00000349393 |
| ENSP00000342011 | ENSP00000352257 |
| ENSP00000342011 | ENSP00000367263 |
| ENSP00000342011 | ENSP00000373354 |
| ENSP00000342011 | ENSP00000400806 |
| ENSP00000342023 | ENSP00000343535 |
| ENSP00000342023 | ENSP00000356595 |
| ENSP00000342023 | ENSP00000396439 |
| ENSP00000342026 | ENSP00000342032 |
| ENSP00000342026 | ENSP00000351284 |
| ENSP00000342026 | ENSP00000356410 |
| ENSP00000342026 | ENSP00000356505 |
| ENSP00000342026 | ENSP00000356652 |
| ENSP00000342026 | ENSP00000359976 |
| ENSP00000342026 | ENSP00000368646 |
| ENSP00000342026 | ENSP00000369335 |
| ENSP00000342026 | ENSP00000370930 |
| ENSP00000342026 | ENSP00000371388 |
| ENSP00000342026 | ENSP00000373477 |
| ENSP00000342026 | ENSP00000375986 |
| ENSP00000342026 | ENSP00000387262 |
| ENSP00000342026 | ENSP00000417602 |

|                 |                 |
|-----------------|-----------------|
| ENSP00000342032 | ENSP00000358810 |
| ENSP00000342032 | ENSP00000362413 |
| ENSP00000342032 | ENSP00000363873 |
| ENSP00000342032 | ENSP00000368646 |
| ENSP00000342032 | ENSP00000379568 |
| ENSP00000342056 | ENSP00000353741 |
| ENSP00000342056 | ENSP00000353804 |
| ENSP00000342056 | ENSP00000359526 |
| ENSP00000342056 | ENSP00000360268 |
| ENSP00000342056 | ENSP00000360286 |
| ENSP00000342056 | ENSP00000363559 |
| ENSP00000342056 | ENSP00000366482 |
| ENSP00000342056 | ENSP00000367079 |
| ENSP00000342056 | ENSP00000377527 |
| ENSP00000342056 | ENSP00000387262 |
| ENSP00000342056 | ENSP00000394382 |
| ENSP00000342087 | ENSP00000344456 |
| ENSP00000342087 | ENSP00000345096 |
| ENSP00000342087 | ENSP00000346173 |
| ENSP00000342087 | ENSP00000357880 |
| ENSP00000342087 | ENSP00000368438 |
| ENSP00000342087 | ENSP00000379865 |
| ENSP00000342098 | ENSP00000372224 |
| ENSP00000342112 | ENSP00000348828 |
| ENSP00000342112 | ENSP00000355026 |
| ENSP00000342112 | ENSP00000355136 |
| ENSP00000342112 | ENSP00000355296 |
| ENSP00000342112 | ENSP00000357484 |
| ENSP00000342112 | ENSP00000358857 |
| ENSP00000342112 | ENSP00000360532 |
| ENSP00000342112 | ENSP00000366121 |
| ENSP00000342112 | ENSP00000368686 |
| ENSP00000342112 | ENSP00000383911 |
| ENSP00000342112 | ENSP00000417281 |
| ENSP00000342121 | ENSP00000346697 |
| ENSP00000342121 | ENSP00000347836 |
| ENSP00000342121 | ENSP00000403852 |
| ENSP00000342136 | ENSP00000358857 |
| ENSP00000342156 | ENSP00000354782 |
| ENSP00000342169 | ENSP00000368931 |
| ENSP00000342181 | ENSP00000349887 |
| ENSP00000342181 | ENSP00000351947 |
| ENSP00000342181 | ENSP00000352738 |
| ENSP00000342181 | ENSP00000354040 |
| ENSP00000342181 | ENSP00000354045 |
| ENSP00000342181 | ENSP00000355231 |

|                 |                 |
|-----------------|-----------------|
| ENSP00000342181 | ENSP00000358400 |
| ENSP00000342181 | ENSP00000358799 |
| ENSP00000342181 | ENSP00000360031 |
| ENSP00000342181 | ENSP00000360412 |
| ENSP00000342181 | ENSP00000360532 |
| ENSP00000342181 | ENSP00000360828 |
| ENSP00000342181 | ENSP00000361949 |
| ENSP00000342181 | ENSP00000362153 |
| ENSP00000342181 | ENSP00000366519 |
| ENSP00000342181 | ENSP00000369716 |
| ENSP00000342181 | ENSP00000370589 |
| ENSP00000342181 | ENSP00000377747 |
| ENSP00000342181 | ENSP00000382392 |
| ENSP00000342181 | ENSP00000386722 |
| ENSP00000342181 | ENSP00000398824 |
| ENSP00000342181 | ENSP00000399511 |
| ENSP00000342181 | ENSP00000403817 |
| ENSP00000342262 | ENSP00000367721 |
| ENSP00000342300 | ENSP00000354876 |
| ENSP00000342300 | ENSP00000355890 |
| ENSP00000342300 | ENSP00000364578 |
| ENSP00000342300 | ENSP00000372335 |
| ENSP00000342300 | ENSP00000380431 |
| ENSP00000342300 | ENSP00000381045 |
| ENSP00000342300 | ENSP00000384474 |
| ENSP00000342307 | ENSP00000344456 |
| ENSP00000342307 | ENSP00000357887 |
| ENSP00000342307 | ENSP00000358404 |
| ENSP00000342307 | ENSP00000372023 |
| ENSP00000342307 | ENSP00000376903 |
| ENSP00000342307 | ENSP00000378286 |
| ENSP00000342307 | ENSP00000378529 |
| ENSP00000342343 | ENSP00000357907 |
| ENSP00000342343 | ENSP00000362948 |
| ENSP00000342343 | ENSP00000363193 |
| ENSP00000342343 | ENSP00000373363 |
| ENSP00000342374 | ENSP00000346986 |
| ENSP00000342374 | ENSP00000348010 |
| ENSP00000342374 | ENSP00000351137 |
| ENSP00000342374 | ENSP00000357631 |
| ENSP00000342374 | ENSP00000358716 |
| ENSP00000342374 | ENSP00000359127 |
| ENSP00000342374 | ENSP00000359939 |
| ENSP00000342374 | ENSP00000360532 |
| ENSP00000342374 | ENSP00000360876 |
| ENSP00000342374 | ENSP00000361577 |



|                 |                 |
|-----------------|-----------------|
| ENSP00000342374 | ENSP00000362110 |
| ENSP00000342374 | ENSP00000362306 |
| ENSP00000342374 | ENSP00000362900 |
| ENSP00000342374 | ENSP00000362936 |
| ENSP00000342374 | ENSP00000363313 |
| ENSP00000342374 | ENSP00000364289 |
| ENSP00000342374 | ENSP00000364813 |
| ENSP00000342374 | ENSP00000366557 |
| ENSP00000342374 | ENSP00000366607 |
| ENSP00000342374 | ENSP00000368686 |
| ENSP00000342374 | ENSP00000370083 |
| ENSP00000342374 | ENSP00000370119 |
| ENSP00000342374 | ENSP00000376758 |
| ENSP00000342374 | ENSP00000379607 |
| ENSP00000342374 | ENSP00000391723 |
| ENSP00000342374 | ENSP00000392270 |
| ENSP00000342374 | ENSP00000400591 |
| ENSP00000342374 | ENSP00000410758 |
| ENSP00000342374 | ENSP00000412566 |
| ENSP00000342374 | ENSP00000414006 |
| ENSP00000342374 | ENSP00000414634 |
| ENSP00000342381 | ENSP00000349016 |
| ENSP00000342381 | ENSP00000350686 |
| ENSP00000342381 | ENSP00000354586 |
| ENSP00000342381 | ENSP00000354720 |
| ENSP00000342381 | ENSP00000355471 |
| ENSP00000342381 | ENSP00000356548 |
| ENSP00000342381 | ENSP00000358335 |
| ENSP00000342381 | ENSP00000360676 |
| ENSP00000342381 | ENSP00000363559 |
| ENSP00000342381 | ENSP00000363779 |
| ENSP00000342381 | ENSP00000368438 |
| ENSP00000342434 | ENSP00000348089 |
| ENSP00000342434 | ENSP00000351250 |
| ENSP00000342434 | ENSP00000353458 |
| ENSP00000342434 | ENSP00000353622 |
| ENSP00000342434 | ENSP00000361180 |
| ENSP00000342434 | ENSP00000368438 |
| ENSP00000342434 | ENSP00000369335 |
| ENSP00000342434 | ENSP00000370968 |
| ENSP00000342434 | ENSP00000380414 |
| ENSP00000342434 | ENSP00000396704 |
| ENSP00000342502 | ENSP00000369757 |
| ENSP00000342502 | ENSP00000386227 |
| ENSP00000342510 | ENSP00000368464 |
| ENSP00000342557 | ENSP00000359321 |

|                 |                 |
|-----------------|-----------------|
| ENSP00000342557 | ENSP00000366156 |
| ENSP00000342557 | ENSP00000385746 |
| ENSP00000342564 | ENSP00000349577 |
| ENSP00000342564 | ENSP00000379607 |
| ENSP00000342609 | ENSP00000376268 |
| ENSP00000342667 | ENSP00000358335 |
| ENSP00000342667 | ENSP00000358918 |
| ENSP00000342681 | ENSP00000354782 |
| ENSP00000342681 | ENSP00000358490 |
| ENSP00000342681 | ENSP00000367841 |
| ENSP00000342681 | ENSP00000376544 |
| ENSP00000342755 | ENSP00000354201 |
| ENSP00000342755 | ENSP00000355629 |
| ENSP00000342755 | ENSP00000355865 |
| ENSP00000342755 | ENSP00000358997 |
| ENSP00000342755 | ENSP00000360116 |
| ENSP00000342755 | ENSP00000363095 |
| ENSP00000342755 | ENSP00000384053 |
| ENSP00000342755 | ENSP00000393596 |
| ENSP00000342793 | ENSP00000346733 |
| ENSP00000342793 | ENSP00000348602 |
| ENSP00000342793 | ENSP00000350297 |
| ENSP00000342793 | ENSP00000350854 |
| ENSP00000342793 | ENSP00000351346 |
| ENSP00000342793 | ENSP00000353660 |
| ENSP00000342793 | ENSP00000355607 |
| ENSP00000342793 | ENSP00000355721 |
| ENSP00000342793 | ENSP00000358497 |
| ENSP00000342793 | ENSP00000358554 |
| ENSP00000342793 | ENSP00000362399 |
| ENSP00000342793 | ENSP00000369860 |
| ENSP00000342793 | ENSP00000373715 |
| ENSP00000342793 | ENSP00000376268 |
| ENSP00000342793 | ENSP00000387185 |
| ENSP00000342828 | ENSP00000384597 |
| ENSP00000342858 | ENSP00000366135 |
| ENSP00000342858 | ENSP00000416387 |
| ENSP00000342889 | ENSP00000345156 |
| ENSP00000342889 | ENSP00000348168 |
| ENSP00000342889 | ENSP00000350283 |
| ENSP00000342889 | ENSP00000359531 |
| ENSP00000342889 | ENSP00000361465 |
| ENSP00000342889 | ENSP00000383503 |
| ENSP00000342889 | ENSP00000386759 |
| ENSP00000342889 | ENSP00000397636 |
| ENSP00000342889 | ENSP00000402338 |

|                 |                 |
|-----------------|-----------------|
| ENSP00000342889 | ENSP00000403852 |
| ENSP00000342889 | ENSP00000405636 |
| ENSP00000342889 | ENSP00000406293 |
| ENSP00000342889 | ENSP00000410530 |
| ENSP00000342889 | ENSP00000410954 |
| ENSP00000342889 | ENSP00000414110 |
| ENSP00000342889 | ENSP00000416599 |
| ENSP00000342905 | ENSP00000360532 |
| ENSP00000343001 | ENSP00000347498 |
| ENSP00000343001 | ENSP00000347997 |
| ENSP00000343001 | ENSP00000348965 |
| ENSP00000343001 | ENSP00000350708 |
| ENSP00000343001 | ENSP00000354883 |
| ENSP00000343001 | ENSP00000355153 |
| ENSP00000343001 | ENSP00000360916 |
| ENSP00000343001 | ENSP00000363338 |
| ENSP00000343001 | ENSP00000369531 |
| ENSP00000343001 | ENSP00000379457 |
| ENSP00000343001 | ENSP00000380460 |
| ENSP00000343001 | ENSP00000382269 |
| ENSP00000343001 | ENSP00000417281 |
| ENSP00000343023 | ENSP00000343129 |
| ENSP00000343023 | ENSP00000347836 |
| ENSP00000343023 | ENSP00000353344 |
| ENSP00000343081 | ENSP00000346067 |
| ENSP00000343081 | ENSP00000358563 |
| ENSP00000343081 | ENSP00000360412 |
| ENSP00000343081 | ENSP00000366135 |
| ENSP00000343081 | ENSP00000370741 |
| ENSP00000343081 | ENSP00000379888 |
| ENSP00000343081 | ENSP00000380982 |
| ENSP00000343103 | ENSP00000350249 |
| ENSP00000343103 | ENSP00000352121 |
| ENSP00000343103 | ENSP00000358092 |
| ENSP00000343103 | ENSP00000412566 |
| ENSP00000343129 | ENSP00000355759 |
| ENSP00000343129 | ENSP00000371711 |
| ENSP00000343129 | ENSP00000374240 |
| ENSP00000343129 | ENSP00000382562 |
| ENSP00000343129 | ENSP00000416097 |
| ENSP00000343144 | ENSP00000347169 |
| ENSP00000343144 | ENSP00000357206 |
| ENSP00000343144 | ENSP00000357484 |
| ENSP00000343144 | ENSP00000363921 |
| ENSP00000343144 | ENSP00000364092 |
| ENSP00000343190 | ENSP00000351284 |

|                 |                 |
|-----------------|-----------------|
| ENSP00000343190 | ENSP00000355013 |
| ENSP00000343190 | ENSP00000356405 |
| ENSP00000343190 | ENSP00000360645 |
| ENSP00000343190 | ENSP00000365025 |
| ENSP00000343190 | ENSP00000369716 |
| ENSP00000343190 | ENSP00000373702 |
| ENSP00000343190 | ENSP00000374280 |
| ENSP00000343190 | ENSP00000377747 |
| ENSP00000343190 | ENSP00000392028 |
| ENSP00000343190 | ENSP00000406490 |
| ENSP00000343190 | ENSP00000410396 |
| ENSP00000343190 | ENSP00000412922 |
| ENSP00000343246 | ENSP00000362588 |
| ENSP00000343246 | ENSP00000381499 |
| ENSP00000343279 | ENSP00000380921 |
| ENSP00000343313 | ENSP00000347184 |
| ENSP00000343313 | ENSP00000348886 |
| ENSP00000343313 | ENSP00000349785 |
| ENSP00000343313 | ENSP00000355231 |
| ENSP00000343313 | ENSP00000356379 |
| ENSP00000343313 | ENSP00000358033 |
| ENSP00000343313 | ENSP00000359225 |
| ENSP00000343313 | ENSP00000362592 |
| ENSP00000343313 | ENSP00000364582 |
| ENSP00000343313 | ENSP00000401980 |
| ENSP00000343313 | ENSP00000404923 |
| ENSP00000343313 | ENSP00000417190 |
| ENSP00000343313 | ENSP00000417963 |
| ENSP00000343362 | ENSP00000349785 |
| ENSP00000343362 | ENSP00000352928 |
| ENSP00000343362 | ENSP00000379607 |
| ENSP00000343392 | ENSP00000343741 |
| ENSP00000343392 | ENSP00000343745 |
| ENSP00000343392 | ENSP00000344741 |
| ENSP00000343392 | ENSP00000346015 |
| ENSP00000343392 | ENSP00000346022 |
| ENSP00000343392 | ENSP00000347232 |
| ENSP00000343392 | ENSP00000347978 |
| ENSP00000343392 | ENSP00000351284 |
| ENSP00000343392 | ENSP00000351697 |
| ENSP00000343392 | ENSP00000352257 |
| ENSP00000343392 | ENSP00000353793 |
| ENSP00000343392 | ENSP00000354522 |
| ENSP00000343392 | ENSP00000354525 |
| ENSP00000343392 | ENSP00000354739 |
| ENSP00000343392 | ENSP00000354957 |

|                 |                 |
|-----------------|-----------------|
| ENSP00000343392 | ENSP00000355167 |
| ENSP00000343392 | ENSP00000355185 |
| ENSP00000343392 | ENSP00000355884 |
| ENSP00000343392 | ENSP00000355890 |
| ENSP00000343392 | ENSP00000358478 |
| ENSP00000343392 | ENSP00000359345 |
| ENSP00000343392 | ENSP00000360310 |
| ENSP00000343392 | ENSP00000360327 |
| ENSP00000343392 | ENSP00000360621 |
| ENSP00000343392 | ENSP00000361287 |
| ENSP00000343392 | ENSP00000361310 |
| ENSP00000343392 | ENSP00000363021 |
| ENSP00000343392 | ENSP00000363676 |
| ENSP00000343392 | ENSP00000364270 |
| ENSP00000343392 | ENSP00000364320 |
| ENSP00000343392 | ENSP00000365534 |
| ENSP00000343392 | ENSP00000365588 |
| ENSP00000343392 | ENSP00000367527 |
| ENSP00000343392 | ENSP00000367910 |
| ENSP00000343392 | ENSP00000368349 |
| ENSP00000343392 | ENSP00000368438 |
| ENSP00000343392 | ENSP00000369335 |
| ENSP00000343392 | ENSP00000369411 |
| ENSP00000343392 | ENSP00000369497 |
| ENSP00000343392 | ENSP00000370150 |
| ENSP00000343392 | ENSP00000370151 |
| ENSP00000343392 | ENSP00000372023 |
| ENSP00000343392 | ENSP00000373060 |
| ENSP00000343392 | ENSP00000373404 |
| ENSP00000343392 | ENSP00000374399 |
| ENSP00000343392 | ENSP00000377640 |
| ENSP00000343392 | ENSP00000377865 |
| ENSP00000343392 | ENSP00000380460 |
| ENSP00000343392 | ENSP00000380504 |
| ENSP00000343392 | ENSP00000382218 |
| ENSP00000343392 | ENSP00000384048 |
| ENSP00000343392 | ENSP00000387429 |
| ENSP00000343392 | ENSP00000389103 |
| ENSP00000343392 | ENSP00000389709 |
| ENSP00000343392 | ENSP00000394649 |
| ENSP00000343392 | ENSP00000396484 |
| ENSP00000343392 | ENSP00000396704 |
| ENSP00000343392 | ENSP00000397830 |
| ENSP00000343392 | ENSP00000402515 |
| ENSP00000343392 | ENSP00000404318 |
| ENSP00000343392 | ENSP00000406868 |

|                 |                 |
|-----------------|-----------------|
| ENSP00000343392 | ENSP00000407047 |
| ENSP00000343392 | ENSP00000409167 |
| ENSP00000343392 | ENSP00000415212 |
| ENSP00000343392 | ENSP00000416511 |
| ENSP00000343412 | ENSP00000343535 |
| ENSP00000343412 | ENSP00000347979 |
| ENSP00000343412 | ENSP00000350283 |
| ENSP00000343412 | ENSP00000350512 |
| ENSP00000343412 | ENSP00000352408 |
| ENSP00000343412 | ENSP00000359818 |
| ENSP00000343412 | ENSP00000366434 |
| ENSP00000343412 | ENSP00000369497 |
| ENSP00000343412 | ENSP00000381003 |
| ENSP00000343435 | ENSP00000344106 |
| ENSP00000343435 | ENSP00000352257 |
| ENSP00000343435 | ENSP00000368959 |
| ENSP00000343435 | ENSP00000376871 |
| ENSP00000343479 | ENSP00000347184 |
| ENSP00000343479 | ENSP00000349785 |
| ENSP00000343479 | ENSP00000356602 |
| ENSP00000343479 | ENSP00000357288 |
| ENSP00000343479 | ENSP00000374455 |
| ENSP00000343479 | ENSP00000382064 |
| ENSP00000343526 | ENSP00000343701 |
| ENSP00000343526 | ENSP00000357789 |
| ENSP00000343526 | ENSP00000365891 |
| ENSP00000343526 | ENSP00000368438 |
| ENSP00000343526 | ENSP00000413520 |
| ENSP00000343535 | ENSP00000345282 |
| ENSP00000343535 | ENSP00000347548 |
| ENSP00000343535 | ENSP00000349465 |
| ENSP00000343535 | ENSP00000350708 |
| ENSP00000343535 | ENSP00000351947 |
| ENSP00000343535 | ENSP00000352408 |
| ENSP00000343535 | ENSP00000352516 |
| ENSP00000343535 | ENSP00000353098 |
| ENSP00000343535 | ENSP00000353344 |
| ENSP00000343535 | ENSP00000354912 |
| ENSP00000343535 | ENSP00000358120 |
| ENSP00000343535 | ENSP00000360286 |
| ENSP00000343535 | ENSP00000360497 |
| ENSP00000343535 | ENSP00000360899 |
| ENSP00000343535 | ENSP00000361707 |
| ENSP00000343535 | ENSP00000365019 |
| ENSP00000343535 | ENSP00000366395 |
| ENSP00000343535 | ENSP00000366746 |

|                 |                 |
|-----------------|-----------------|
| ENSP00000343535 | ENSP00000367705 |
| ENSP00000343535 | ENSP00000370589 |
| ENSP00000343535 | ENSP00000371101 |
| ENSP00000343535 | ENSP00000371546 |
| ENSP00000343535 | ENSP00000374501 |
| ENSP00000343535 | ENSP00000377496 |
| ENSP00000343535 | ENSP00000377914 |
| ENSP00000343535 | ENSP00000378165 |
| ENSP00000343535 | ENSP00000378529 |
| ENSP00000343535 | ENSP00000379228 |
| ENSP00000343535 | ENSP00000379607 |
| ENSP00000343535 | ENSP00000381031 |
| ENSP00000343535 | ENSP00000381863 |
| ENSP00000343535 | ENSP00000382492 |
| ENSP00000343535 | ENSP00000384490 |
| ENSP00000343535 | ENSP00000396439 |
| ENSP00000343535 | ENSP00000396876 |
| ENSP00000343535 | ENSP00000413520 |
| ENSP00000343535 | ENSP00000417132 |
| ENSP00000343535 | ENSP00000417281 |
| ENSP00000343535 | ENSP00000418210 |
| ENSP00000343535 | ENSP00000419494 |
| ENSP00000343535 | ENSP00000419851 |
| ENSP00000343552 | ENSP00000352821 |
| ENSP00000343552 | ENSP00000360270 |
| ENSP00000343552 | ENSP00000361845 |
| ENSP00000343552 | ENSP00000383719 |
| ENSP00000343557 | ENSP00000347087 |
| ENSP00000343557 | ENSP00000351137 |
| ENSP00000343557 | ENSP00000358563 |
| ENSP00000343557 | ENSP00000358812 |
| ENSP00000343557 | ENSP00000359454 |
| ENSP00000343557 | ENSP00000360031 |
| ENSP00000343557 | ENSP00000360532 |
| ENSP00000343557 | ENSP00000360828 |
| ENSP00000343557 | ENSP00000361232 |
| ENSP00000343557 | ENSP00000361557 |
| ENSP00000343557 | ENSP00000361577 |
| ENSP00000343557 | ENSP00000362413 |
| ENSP00000343557 | ENSP00000364289 |
| ENSP00000343557 | ENSP00000366557 |
| ENSP00000343557 | ENSP00000367835 |
| ENSP00000343557 | ENSP00000380495 |
| ENSP00000343557 | ENSP00000387006 |
| ENSP00000343557 | ENSP00000391432 |
| ENSP00000343657 | ENSP00000360798 |

|                 |                 |
|-----------------|-----------------|
| ENSP00000343657 | ENSP00000367079 |
| ENSP00000343657 | ENSP00000379430 |
| ENSP00000343657 | ENSP00000384015 |
| ENSP00000343701 | ENSP00000345895 |
| ENSP00000343701 | ENSP00000345917 |
| ENSP00000343701 | ENSP00000346453 |
| ENSP00000343701 | ENSP00000346725 |
| ENSP00000343701 | ENSP00000350283 |
| ENSP00000343701 | ENSP00000353622 |
| ENSP00000343701 | ENSP00000355050 |
| ENSP00000343701 | ENSP00000356811 |
| ENSP00000343701 | ENSP00000357484 |
| ENSP00000343701 | ENSP00000359939 |
| ENSP00000343701 | ENSP00000360286 |
| ENSP00000343701 | ENSP00000360621 |
| ENSP00000343701 | ENSP00000361433 |
| ENSP00000343701 | ENSP00000362532 |
| ENSP00000343701 | ENSP00000362936 |
| ENSP00000343701 | ENSP00000366135 |
| ENSP00000343701 | ENSP00000368349 |
| ENSP00000343701 | ENSP00000368438 |
| ENSP00000343701 | ENSP00000368439 |
| ENSP00000343701 | ENSP00000368984 |
| ENSP00000343701 | ENSP00000371155 |
| ENSP00000343701 | ENSP00000384109 |
| ENSP00000343701 | ENSP00000394791 |
| ENSP00000343701 | ENSP00000398597 |
| ENSP00000343701 | ENSP00000412566 |
| ENSP00000343741 | ENSP00000344537 |
| ENSP00000343741 | ENSP00000344741 |
| ENSP00000343741 | ENSP00000346566 |
| ENSP00000343741 | ENSP00000347168 |
| ENSP00000343741 | ENSP00000347232 |
| ENSP00000343741 | ENSP00000347978 |
| ENSP00000343741 | ENSP00000348089 |
| ENSP00000343741 | ENSP00000348554 |
| ENSP00000343741 | ENSP00000348784 |
| ENSP00000343741 | ENSP00000349213 |
| ENSP00000343741 | ENSP00000349393 |
| ENSP00000343741 | ENSP00000350199 |
| ENSP00000343741 | ENSP00000350283 |
| ENSP00000343741 | ENSP00000350491 |
| ENSP00000343741 | ENSP00000350512 |
| ENSP00000343741 | ENSP00000350767 |
| ENSP00000343741 | ENSP00000351113 |
| ENSP00000343741 | ENSP00000351284 |



|                 |                 |
|-----------------|-----------------|
| ENSP00000343741 | ENSP00000352257 |
| ENSP00000343741 | ENSP00000353098 |
| ENSP00000343741 | ENSP00000353575 |
| ENSP00000343741 | ENSP00000353622 |
| ENSP00000343741 | ENSP00000353741 |
| ENSP00000343741 | ENSP00000353793 |
| ENSP00000343741 | ENSP00000354916 |
| ENSP00000343741 | ENSP00000355958 |
| ENSP00000343741 | ENSP00000356448 |
| ENSP00000343741 | ENSP00000358478 |
| ENSP00000343741 | ENSP00000360310 |
| ENSP00000343741 | ENSP00000360532 |
| ENSP00000343741 | ENSP00000360621 |
| ENSP00000343741 | ENSP00000361310 |
| ENSP00000343741 | ENSP00000362413 |
| ENSP00000343741 | ENSP00000362546 |
| ENSP00000343741 | ENSP00000363021 |
| ENSP00000343741 | ENSP00000364119 |
| ENSP00000343741 | ENSP00000364270 |
| ENSP00000343741 | ENSP00000365891 |
| ENSP00000343741 | ENSP00000366974 |
| ENSP00000343741 | ENSP00000367034 |
| ENSP00000343741 | ENSP00000368438 |
| ENSP00000343741 | ENSP00000368646 |
| ENSP00000343741 | ENSP00000369038 |
| ENSP00000343741 | ENSP00000369335 |
| ENSP00000343741 | ENSP00000369497 |
| ENSP00000343741 | ENSP00000370150 |
| ENSP00000343741 | ENSP00000370151 |
| ENSP00000343741 | ENSP00000371475 |
| ENSP00000343741 | ENSP00000372023 |
| ENSP00000343741 | ENSP00000372316 |
| ENSP00000343741 | ENSP00000373347 |
| ENSP00000343741 | ENSP00000373952 |
| ENSP00000343741 | ENSP00000377384 |
| ENSP00000343741 | ENSP00000377747 |
| ENSP00000343741 | ENSP00000378350 |
| ENSP00000343741 | ENSP00000378529 |
| ENSP00000343741 | ENSP00000385995 |
| ENSP00000343741 | ENSP00000386722 |
| ENSP00000343741 | ENSP00000386759 |
| ENSP00000343741 | ENSP00000392028 |
| ENSP00000343741 | ENSP00000397644 |
| ENSP00000343741 | ENSP00000399968 |
| ENSP00000343741 | ENSP00000402084 |
| ENSP00000343741 | ENSP00000406490 |

|                 |                 |
|-----------------|-----------------|
| ENSP00000343741 | ENSP00000413625 |
| ENSP00000343742 | ENSP00000353701 |
| ENSP00000343745 | ENSP00000344352 |
| ENSP00000343745 | ENSP00000346015 |
| ENSP00000343745 | ENSP00000349208 |
| ENSP00000343745 | ENSP00000350651 |
| ENSP00000343745 | ENSP00000351284 |
| ENSP00000343745 | ENSP00000351697 |
| ENSP00000343745 | ENSP00000354720 |
| ENSP00000343745 | ENSP00000354739 |
| ENSP00000343745 | ENSP00000354957 |
| ENSP00000343745 | ENSP00000355388 |
| ENSP00000343745 | ENSP00000356146 |
| ENSP00000343745 | ENSP00000356520 |
| ENSP00000343745 | ENSP00000358812 |
| ENSP00000343745 | ENSP00000359818 |
| ENSP00000343745 | ENSP00000360286 |
| ENSP00000343745 | ENSP00000360310 |
| ENSP00000343745 | ENSP00000362306 |
| ENSP00000343745 | ENSP00000363018 |
| ENSP00000343745 | ENSP00000363676 |
| ENSP00000343745 | ENSP00000364270 |
| ENSP00000343745 | ENSP00000365439 |
| ENSP00000343745 | ENSP00000366135 |
| ENSP00000343745 | ENSP00000366557 |
| ENSP00000343745 | ENSP00000367029 |
| ENSP00000343745 | ENSP00000368349 |
| ENSP00000343745 | ENSP00000368438 |
| ENSP00000343745 | ENSP00000369335 |
| ENSP00000343745 | ENSP00000369411 |
| ENSP00000343745 | ENSP00000370151 |
| ENSP00000343745 | ENSP00000371169 |
| ENSP00000343745 | ENSP00000373272 |
| ENSP00000343745 | ENSP00000373340 |
| ENSP00000343745 | ENSP00000375730 |
| ENSP00000343745 | ENSP00000377486 |
| ENSP00000343745 | ENSP00000380718 |
| ENSP00000343745 | ENSP00000383503 |
| ENSP00000343745 | ENSP00000405636 |
| ENSP00000343745 | ENSP00000416599 |
| ENSP00000343785 | ENSP00000345530 |
| ENSP00000343785 | ENSP00000347942 |
| ENSP00000343785 | ENSP00000357494 |
| ENSP00000343785 | ENSP00000359634 |
| ENSP00000343785 | ENSP00000368190 |
| ENSP00000343785 | ENSP00000370719 |

|                 |                 |
|-----------------|-----------------|
| ENSP00000343785 | ENSP00000373700 |
| ENSP00000343785 | ENSP00000380921 |
| ENSP00000343785 | ENSP00000387426 |
| ENSP00000343818 | ENSP00000349824 |
| ENSP00000343818 | ENSP00000351665 |
| ENSP00000343818 | ENSP00000366863 |
| ENSP00000343885 | ENSP00000347134 |
| ENSP00000343885 | ENSP00000351682 |
| ENSP00000343885 | ENSP00000362592 |
| ENSP00000343885 | ENSP00000364649 |
| ENSP00000343885 | ENSP00000366953 |
| ENSP00000343885 | ENSP00000370719 |
| ENSP00000343885 | ENSP00000373404 |
| ENSP00000343885 | ENSP00000382767 |
| ENSP00000343885 | ENSP00000387982 |
| ENSP00000343885 | ENSP00000418210 |
| ENSP00000343943 | ENSP00000350512 |
| ENSP00000343943 | ENSP00000356444 |
| ENSP00000343943 | ENSP00000369335 |
| ENSP00000344055 | ENSP00000347408 |
| ENSP00000344055 | ENSP00000353904 |
| ENSP00000344055 | ENSP00000354995 |
| ENSP00000344055 | ENSP00000359484 |
| ENSP00000344055 | ENSP00000360149 |
| ENSP00000344055 | ENSP00000360183 |
| ENSP00000344055 | ENSP00000364794 |
| ENSP00000344055 | ENSP00000365025 |
| ENSP00000344055 | ENSP00000365837 |
| ENSP00000344055 | ENSP00000369810 |
| ENSP00000344055 | ENSP00000370571 |
| ENSP00000344055 | ENSP00000375881 |
| ENSP00000344055 | ENSP00000377769 |
| ENSP00000344055 | ENSP00000397441 |
| ENSP00000344055 | ENSP00000402240 |
| ENSP00000344055 | ENSP00000418661 |
| ENSP00000344106 | ENSP00000344779 |
| ENSP00000344106 | ENSP00000363349 |
| ENSP00000344106 | ENSP00000363397 |
| ENSP00000344106 | ENSP00000368959 |
| ENSP00000344106 | ENSP00000369862 |
| ENSP00000344220 | ENSP00000346022 |
| ENSP00000344220 | ENSP00000346762 |
| ENSP00000344220 | ENSP00000352121 |
| ENSP00000344220 | ENSP00000354558 |
| ENSP00000344220 | ENSP00000355759 |
| ENSP00000344220 | ENSP00000356346 |

|                 |                 |
|-----------------|-----------------|
| ENSP00000344220 | ENSP00000359552 |
| ENSP00000344220 | ENSP00000361120 |
| ENSP00000344220 | ENSP00000364119 |
| ENSP00000344220 | ENSP00000372857 |
| ENSP00000344220 | ENSP00000380150 |
| ENSP00000344220 | ENSP00000392270 |
| ENSP00000344220 | ENSP00000415203 |
| ENSP00000344223 | ENSP00000353655 |
| ENSP00000344223 | ENSP00000364349 |
| ENSP00000344223 | ENSP00000416097 |
| ENSP00000344241 | ENSP00000346986 |
| ENSP00000344241 | ENSP00000348010 |
| ENSP00000344241 | ENSP00000348107 |
| ENSP00000344241 | ENSP00000361577 |
| ENSP00000344241 | ENSP00000364289 |
| ENSP00000344241 | ENSP00000366607 |
| ENSP00000344314 | ENSP00000347733 |
| ENSP00000344314 | ENSP00000356785 |
| ENSP00000344352 | ENSP00000350359 |
| ENSP00000344352 | ENSP00000357440 |
| ENSP00000344352 | ENSP00000358854 |
| ENSP00000344352 | ENSP00000370421 |
| ENSP00000344352 | ENSP00000417281 |
| ENSP00000344393 | ENSP00000358563 |
| ENSP00000344393 | ENSP00000361982 |
| ENSP00000344393 | ENSP00000370589 |
| ENSP00000344393 | ENSP00000402338 |
| ENSP00000344431 | ENSP00000346791 |
| ENSP00000344431 | ENSP00000360286 |
| ENSP00000344431 | ENSP00000367208 |
| ENSP00000344431 | ENSP00000381003 |
| ENSP00000344432 | ENSP00000363571 |
| ENSP00000344446 | ENSP00000358423 |
| ENSP00000344456 | ENSP00000344666 |
| ENSP00000344456 | ENSP00000345731 |
| ENSP00000344456 | ENSP00000346340 |
| ENSP00000344456 | ENSP00000347184 |
| ENSP00000344456 | ENSP00000347733 |
| ENSP00000344456 | ENSP00000348784 |
| ENSP00000344456 | ENSP00000349465 |
| ENSP00000344456 | ENSP00000349486 |
| ENSP00000344456 | ENSP00000349887 |
| ENSP00000344456 | ENSP00000350512 |
| ENSP00000344456 | ENSP00000351113 |
| ENSP00000344456 | ENSP00000351221 |
| ENSP00000344456 | ENSP00000352821 |

|                 |                 |
|-----------------|-----------------|
| ENSP00000344456 | ENSP00000353238 |
| ENSP00000344456 | ENSP00000354558 |
| ENSP00000344456 | ENSP00000354560 |
| ENSP00000344456 | ENSP00000354586 |
| ENSP00000344456 | ENSP00000355760 |
| ENSP00000344456 | ENSP00000355866 |
| ENSP00000344456 | ENSP00000355923 |
| ENSP00000344456 | ENSP00000356331 |
| ENSP00000344456 | ENSP00000356346 |
| ENSP00000344456 | ENSP00000356405 |
| ENSP00000344456 | ENSP00000356652 |
| ENSP00000344456 | ENSP00000356774 |
| ENSP00000344456 | ENSP00000357283 |
| ENSP00000344456 | ENSP00000357442 |
| ENSP00000344456 | ENSP00000358335 |
| ENSP00000344456 | ENSP00000358404 |
| ENSP00000344456 | ENSP00000358857 |
| ENSP00000344456 | ENSP00000359042 |
| ENSP00000344456 | ENSP00000359206 |
| ENSP00000344456 | ENSP00000359854 |
| ENSP00000344456 | ENSP00000361186 |
| ENSP00000344456 | ENSP00000361467 |
| ENSP00000344456 | ENSP00000361596 |
| ENSP00000344456 | ENSP00000362592 |
| ENSP00000344456 | ENSP00000363921 |
| ENSP00000344456 | ENSP00000364524 |
| ENSP00000344456 | ENSP00000365025 |
| ENSP00000344456 | ENSP00000365735 |
| ENSP00000344456 | ENSP00000365877 |
| ENSP00000344456 | ENSP00000367432 |
| ENSP00000344456 | ENSP00000367608 |
| ENSP00000344456 | ENSP00000368976 |
| ENSP00000344456 | ENSP00000371734 |
| ENSP00000344456 | ENSP00000374213 |
| ENSP00000344456 | ENSP00000375783 |
| ENSP00000344456 | ENSP00000375857 |
| ENSP00000344456 | ENSP00000377047 |
| ENSP00000344456 | ENSP00000377862 |
| ENSP00000344456 | ENSP00000379457 |
| ENSP00000344456 | ENSP00000381098 |
| ENSP00000344456 | ENSP00000381657 |
| ENSP00000344456 | ENSP00000385021 |
| ENSP00000344456 | ENSP00000394794 |
| ENSP00000344456 | ENSP00000399511 |
| ENSP00000344456 | ENSP00000399968 |
| ENSP00000344456 | ENSP00000410083 |

|                 |                 |
|-----------------|-----------------|
| ENSP00000344456 | ENSP00000414187 |
| ENSP00000344460 | ENSP00000346453 |
| ENSP00000344460 | ENSP00000347184 |
| ENSP00000344460 | ENSP00000356602 |
| ENSP00000344460 | ENSP00000357651 |
| ENSP00000344460 | ENSP00000361057 |
| ENSP00000344460 | ENSP00000367079 |
| ENSP00000344460 | ENSP00000369862 |
| ENSP00000344460 | ENSP00000370377 |
| ENSP00000344460 | ENSP00000382779 |
| ENSP00000344460 | ENSP00000413520 |
| ENSP00000344468 | ENSP00000367408 |
| ENSP00000344504 | ENSP00000345702 |
| ENSP00000344504 | ENSP00000347168 |
| ENSP00000344504 | ENSP00000350767 |
| ENSP00000344504 | ENSP00000351284 |
| ENSP00000344504 | ENSP00000352257 |
| ENSP00000344504 | ENSP00000355205 |
| ENSP00000344504 | ENSP00000360621 |
| ENSP00000344504 | ENSP00000362352 |
| ENSP00000344504 | ENSP00000366974 |
| ENSP00000344504 | ENSP00000367034 |
| ENSP00000344504 | ENSP00000367454 |
| ENSP00000344504 | ENSP00000368438 |
| ENSP00000344504 | ENSP00000369042 |
| ENSP00000344504 | ENSP00000372023 |
| ENSP00000344524 | ENSP00000366603 |
| ENSP00000344537 | ENSP00000345702 |
| ENSP00000344537 | ENSP00000347733 |
| ENSP00000344537 | ENSP00000348010 |
| ENSP00000344537 | ENSP00000351575 |
| ENSP00000344537 | ENSP00000352121 |
| ENSP00000344537 | ENSP00000353622 |
| ENSP00000344537 | ENSP00000354558 |
| ENSP00000344537 | ENSP00000354633 |
| ENSP00000344537 | ENSP00000355051 |
| ENSP00000344537 | ENSP00000357494 |
| ENSP00000344537 | ENSP00000357887 |
| ENSP00000344537 | ENSP00000358854 |
| ENSP00000344537 | ENSP00000358886 |
| ENSP00000344537 | ENSP00000360515 |
| ENSP00000344537 | ENSP00000362068 |
| ENSP00000344537 | ENSP00000362592 |
| ENSP00000344537 | ENSP00000364815 |
| ENSP00000344537 | ENSP00000366974 |
| ENSP00000344537 | ENSP00000367406 |

|                 |                 |
|-----------------|-----------------|
| ENSP00000344537 | ENSP00000369162 |
| ENSP00000344537 | ENSP00000369695 |
| ENSP00000344537 | ENSP00000369716 |
| ENSP00000344537 | ENSP00000377747 |
| ENSP00000344537 | ENSP00000380921 |
| ENSP00000344537 | ENSP00000396620 |
| ENSP00000344537 | ENSP00000397259 |
| ENSP00000344537 | ENSP00000401121 |
| ENSP00000344537 | ENSP00000402515 |
| ENSP00000344537 | ENSP00000403359 |
| ENSP00000344537 | ENSP00000415316 |
| ENSP00000344547 | ENSP00000353622 |
| ENSP00000344547 | ENSP00000368438 |
| ENSP00000344572 | ENSP00000362824 |
| ENSP00000344572 | ENSP00000363559 |
| ENSP00000344572 | ENSP00000365025 |
| ENSP00000344609 | ENSP00000376903 |
| ENSP00000344648 | ENSP00000354158 |
| ENSP00000344648 | ENSP00000356903 |
| ENSP00000344648 | ENSP00000369816 |
| ENSP00000344666 | ENSP00000348550 |
| ENSP00000344666 | ENSP00000348965 |
| ENSP00000344666 | ENSP00000354040 |
| ENSP00000344666 | ENSP00000357442 |
| ENSP00000344666 | ENSP00000357907 |
| ENSP00000344666 | ENSP00000361027 |
| ENSP00000344666 | ENSP00000361120 |
| ENSP00000344666 | ENSP00000374467 |
| ENSP00000344666 | ENSP00000384675 |
| ENSP00000344668 | ENSP00000347504 |
| ENSP00000344668 | ENSP00000347979 |
| ENSP00000344668 | ENSP00000349205 |
| ENSP00000344668 | ENSP00000350785 |
| ENSP00000344668 | ENSP00000354927 |
| ENSP00000344668 | ENSP00000358335 |
| ENSP00000344668 | ENSP00000358994 |
| ENSP00000344668 | ENSP00000376213 |
| ENSP00000344683 | ENSP00000346483 |
| ENSP00000344683 | ENSP00000355596 |
| ENSP00000344683 | ENSP00000356982 |
| ENSP00000344683 | ENSP00000357905 |
| ENSP00000344683 | ENSP00000358283 |
| ENSP00000344683 | ENSP00000358605 |
| ENSP00000344683 | ENSP00000363018 |
| ENSP00000344683 | ENSP00000387077 |
| ENSP00000344683 | ENSP00000409279 |

|                 |                 |
|-----------------|-----------------|
| ENSP00000344741 | ENSP00000345656 |
| ENSP00000344741 | ENSP00000347232 |
| ENSP00000344741 | ENSP00000351284 |
| ENSP00000344741 | ENSP00000357480 |
| ENSP00000344741 | ENSP00000360621 |
| ENSP00000344741 | ENSP00000362592 |
| ENSP00000344741 | ENSP00000365891 |
| ENSP00000344741 | ENSP00000366953 |
| ENSP00000344741 | ENSP00000368438 |
| ENSP00000344741 | ENSP00000369335 |
| ENSP00000344741 | ENSP00000370151 |
| ENSP00000344741 | ENSP00000371475 |
| ENSP00000344741 | ENSP00000372023 |
| ENSP00000344741 | ENSP00000381657 |
| ENSP00000344741 | ENSP00000387982 |
| ENSP00000344779 | ENSP00000345656 |
| ENSP00000344866 | ENSP00000354791 |
| ENSP00000344874 | ENSP00000345731 |
| ENSP00000344874 | ENSP00000351015 |
| ENSP00000344874 | ENSP00000367208 |
| ENSP00000344936 | ENSP00000346987 |
| ENSP00000344936 | ENSP00000348554 |
| ENSP00000344936 | ENSP00000352257 |
| ENSP00000344936 | ENSP00000359206 |
| ENSP00000344936 | ENSP00000360286 |
| ENSP00000344936 | ENSP00000363322 |
| ENSP00000344936 | ENSP00000378350 |
| ENSP00000344936 | ENSP00000394394 |
| ENSP00000345023 | ENSP00000358106 |
| ENSP00000345023 | ENSP00000362463 |
| ENSP00000345023 | ENSP00000363779 |
| ENSP00000345023 | ENSP00000383059 |
| ENSP00000345023 | ENSP00000391944 |
| ENSP00000345096 | ENSP00000346022 |
| ENSP00000345096 | ENSP00000346874 |
| ENSP00000345096 | ENSP00000355890 |
| ENSP00000345096 | ENSP00000357980 |
| ENSP00000345096 | ENSP00000358019 |
| ENSP00000345096 | ENSP00000359345 |
| ENSP00000345096 | ENSP00000361076 |
| ENSP00000345096 | ENSP00000361186 |
| ENSP00000345096 | ENSP00000361465 |
| ENSP00000345096 | ENSP00000362744 |
| ENSP00000345096 | ENSP00000362936 |
| ENSP00000345096 | ENSP00000363018 |
| ENSP00000345096 | ENSP00000363676 |



|                 |                 |
|-----------------|-----------------|
| ENSP00000345096 | ENSP00000365534 |
| ENSP00000345096 | ENSP00000368984 |
| ENSP00000345096 | ENSP00000369456 |
| ENSP00000345096 | ENSP00000370589 |
| ENSP00000345096 | ENSP00000379888 |
| ENSP00000345096 | ENSP00000382595 |
| ENSP00000345096 | ENSP00000392859 |
| ENSP00000345096 | ENSP00000394869 |
| ENSP00000345107 | ENSP00000365318 |
| ENSP00000345107 | ENSP00000367440 |
| ENSP00000345144 | ENSP00000348577 |
| ENSP00000345156 | ENSP00000346015 |
| ENSP00000345156 | ENSP00000346022 |
| ENSP00000345156 | ENSP00000346027 |
| ENSP00000345156 | ENSP00000346037 |
| ENSP00000345156 | ENSP00000346050 |
| ENSP00000345156 | ENSP00000346088 |
| ENSP00000345156 | ENSP00000346725 |
| ENSP00000345156 | ENSP00000348010 |
| ENSP00000345156 | ENSP00000354040 |
| ENSP00000345156 | ENSP00000354525 |
| ENSP00000345156 | ENSP00000354739 |
| ENSP00000345156 | ENSP00000357480 |
| ENSP00000345156 | ENSP00000359345 |
| ENSP00000345156 | ENSP00000360922 |
| ENSP00000345156 | ENSP00000361076 |
| ENSP00000345156 | ENSP00000362744 |
| ENSP00000345156 | ENSP00000363018 |
| ENSP00000345156 | ENSP00000363559 |
| ENSP00000345156 | ENSP00000363676 |
| ENSP00000345156 | ENSP00000364320 |
| ENSP00000345156 | ENSP00000369757 |
| ENSP00000345156 | ENSP00000370589 |
| ENSP00000345156 | ENSP00000373404 |
| ENSP00000345156 | ENSP00000375730 |
| ENSP00000345156 | ENSP00000377640 |
| ENSP00000345156 | ENSP00000377865 |
| ENSP00000345156 | ENSP00000378160 |
| ENSP00000345156 | ENSP00000379607 |
| ENSP00000345156 | ENSP00000379888 |
| ENSP00000345156 | ENSP00000380156 |
| ENSP00000345156 | ENSP00000380982 |
| ENSP00000345156 | ENSP00000386717 |
| ENSP00000345156 | ENSP00000389103 |
| ENSP00000345156 | ENSP00000391723 |
| ENSP00000345156 | ENSP00000393393 |

|                 |                 |
|-----------------|-----------------|
| ENSP00000345156 | ENSP00000401371 |
| ENSP00000345156 | ENSP00000402338 |
| ENSP00000345156 | ENSP00000414321 |
| ENSP00000345179 | ENSP00000356969 |
| ENSP00000345179 | ENSP00000379607 |
| ENSP00000345229 | ENSP00000377148 |
| ENSP00000345262 | ENSP00000370719 |
| ENSP00000345282 | ENSP00000352408 |
| ENSP00000345282 | ENSP00000365534 |
| ENSP00000345341 | ENSP00000366135 |
| ENSP00000345341 | ENSP00000374455 |
| ENSP00000345395 | ENSP00000348307 |
| ENSP00000345395 | ENSP00000356991 |
| ENSP00000345436 | ENSP00000367408 |
| ENSP00000345445 | ENSP00000348933 |
| ENSP00000345445 | ENSP00000357360 |
| ENSP00000345445 | ENSP00000361686 |
| ENSP00000345445 | ENSP00000366030 |
| ENSP00000345445 | ENSP00000370737 |
| ENSP00000345445 | ENSP00000387262 |
| ENSP00000345464 | ENSP00000347184 |
| ENSP00000345464 | ENSP00000351244 |
| ENSP00000345464 | ENSP00000356489 |
| ENSP00000345528 | ENSP00000361057 |
| ENSP00000345528 | ENSP00000364188 |
| ENSP00000345528 | ENSP00000370607 |
| ENSP00000345530 | ENSP00000346050 |
| ENSP00000345530 | ENSP00000346067 |
| ENSP00000345530 | ENSP00000346634 |
| ENSP00000345530 | ENSP00000348602 |
| ENSP00000345530 | ENSP00000348877 |
| ENSP00000345530 | ENSP00000349785 |
| ENSP00000345530 | ENSP00000352738 |
| ENSP00000345530 | ENSP00000353622 |
| ENSP00000345530 | ENSP00000354558 |
| ENSP00000345530 | ENSP00000354916 |
| ENSP00000345530 | ENSP00000355231 |
| ENSP00000345530 | ENSP00000355890 |
| ENSP00000345530 | ENSP00000356104 |
| ENSP00000345530 | ENSP00000357048 |
| ENSP00000345530 | ENSP00000357789 |
| ENSP00000345530 | ENSP00000359688 |
| ENSP00000345530 | ENSP00000360475 |
| ENSP00000345530 | ENSP00000360798 |
| ENSP00000345530 | ENSP00000361027 |
| ENSP00000345530 | ENSP00000364524 |

|                 |                 |
|-----------------|-----------------|
| ENSP00000345530 | ENSP00000365439 |
| ENSP00000345530 | ENSP00000365891 |
| ENSP00000345530 | ENSP00000366395 |
| ENSP00000345530 | ENSP00000368699 |
| ENSP00000345530 | ENSP00000370880 |
| ENSP00000345530 | ENSP00000371341 |
| ENSP00000345530 | ENSP00000375863 |
| ENSP00000345530 | ENSP00000376097 |
| ENSP00000345530 | ENSP00000380921 |
| ENSP00000345530 | ENSP00000381565 |
| ENSP00000345530 | ENSP00000381793 |
| ENSP00000345530 | ENSP00000381891 |
| ENSP00000345530 | ENSP00000383719 |
| ENSP00000345530 | ENSP00000385545 |
| ENSP00000345530 | ENSP00000391774 |
| ENSP00000345530 | ENSP00000392601 |
| ENSP00000345530 | ENSP00000398789 |
| ENSP00000345530 | ENSP00000399511 |
| ENSP00000345656 | ENSP00000346453 |
| ENSP00000345656 | ENSP00000347836 |
| ENSP00000345656 | ENSP00000353741 |
| ENSP00000345656 | ENSP00000356146 |
| ENSP00000345656 | ENSP00000360621 |
| ENSP00000345656 | ENSP00000368439 |
| ENSP00000345656 | ENSP00000369860 |
| ENSP00000345656 | ENSP00000369862 |
| ENSP00000345656 | ENSP00000377262 |
| ENSP00000345656 | ENSP00000381237 |
| ENSP00000345656 | ENSP00000381293 |
| ENSP00000345656 | ENSP00000392330 |
| ENSP00000345656 | ENSP00000393596 |
| ENSP00000345656 | ENSP00000394791 |
| ENSP00000345656 | ENSP00000402527 |
| ENSP00000345681 | ENSP00000345702 |
| ENSP00000345681 | ENSP00000349213 |
| ENSP00000345681 | ENSP00000351015 |
| ENSP00000345681 | ENSP00000351214 |
| ENSP00000345681 | ENSP00000351250 |
| ENSP00000345681 | ENSP00000352514 |
| ENSP00000345681 | ENSP00000356405 |
| ENSP00000345681 | ENSP00000357348 |
| ENSP00000345681 | ENSP00000359691 |
| ENSP00000345681 | ENSP00000360157 |
| ENSP00000345681 | ENSP00000362578 |
| ENSP00000345681 | ENSP00000367972 |
| ENSP00000345681 | ENSP00000369695 |

|                 |                 |
|-----------------|-----------------|
| ENSP00000345681 | ENSP00000392466 |
| ENSP00000345681 | ENSP00000396620 |
| ENSP00000345681 | ENSP00000399968 |
| ENSP00000345702 | ENSP00000347733 |
| ENSP00000345702 | ENSP00000350283 |
| ENSP00000345702 | ENSP00000350967 |
| ENSP00000345702 | ENSP00000351015 |
| ENSP00000345702 | ENSP00000354633 |
| ENSP00000345702 | ENSP00000354927 |
| ENSP00000345702 | ENSP00000355205 |
| ENSP00000345702 | ENSP00000355865 |
| ENSP00000345702 | ENSP00000356331 |
| ENSP00000345702 | ENSP00000357882 |
| ENSP00000345702 | ENSP00000357907 |
| ENSP00000345702 | ENSP00000360676 |
| ENSP00000345702 | ENSP00000363779 |
| ENSP00000345702 | ENSP00000364349 |
| ENSP00000345702 | ENSP00000365005 |
| ENSP00000345702 | ENSP00000366974 |
| ENSP00000345702 | ENSP00000369695 |
| ENSP00000345702 | ENSP00000374213 |
| ENSP00000345702 | ENSP00000382423 |
| ENSP00000345702 | ENSP00000396620 |
| ENSP00000345728 | ENSP00000348602 |
| ENSP00000345728 | ENSP00000348762 |
| ENSP00000345728 | ENSP00000348965 |
| ENSP00000345728 | ENSP00000360268 |
| ENSP00000345728 | ENSP00000368824 |
| ENSP00000345731 | ENSP00000345985 |
| ENSP00000345731 | ENSP00000347134 |
| ENSP00000345731 | ENSP00000347206 |
| ENSP00000345731 | ENSP00000347301 |
| ENSP00000345731 | ENSP00000349486 |
| ENSP00000345731 | ENSP00000350297 |
| ENSP00000345731 | ENSP00000351170 |
| ENSP00000345731 | ENSP00000352425 |
| ENSP00000345731 | ENSP00000353154 |
| ENSP00000345731 | ENSP00000355865 |
| ENSP00000345731 | ENSP00000357484 |
| ENSP00000345731 | ENSP00000358301 |
| ENSP00000345731 | ENSP00000358994 |
| ENSP00000345731 | ENSP00000359206 |
| ENSP00000345731 | ENSP00000361027 |
| ENSP00000345731 | ENSP00000363921 |
| ENSP00000345731 | ENSP00000365891 |
| ENSP00000345731 | ENSP00000367408 |

|                 |                 |
|-----------------|-----------------|
| ENSP00000345731 | ENSP00000368824 |
| ENSP00000345731 | ENSP00000369400 |
| ENSP00000345731 | ENSP00000370410 |
| ENSP00000345731 | ENSP00000380523 |
| ENSP00000345731 | ENSP00000380531 |
| ENSP00000345731 | ENSP00000381045 |
| ENSP00000345731 | ENSP00000382064 |
| ENSP00000345731 | ENSP00000400258 |
| ENSP00000345731 | ENSP00000401435 |
| ENSP00000345731 | ENSP00000406367 |
| ENSP00000345731 | ENSP00000419952 |
| ENSP00000345773 | ENSP00000358857 |
| ENSP00000345773 | ENSP00000386394 |
| ENSP00000345774 | ENSP00000369757 |
| ENSP00000345793 | ENSP00000359000 |
| ENSP00000345793 | ENSP00000386621 |
| ENSP00000345824 | ENSP00000353362 |
| ENSP00000345892 | ENSP00000348573 |
| ENSP00000345892 | ENSP00000352572 |
| ENSP00000345892 | ENSP00000355922 |
| ENSP00000345892 | ENSP00000361467 |
| ENSP00000345892 | ENSP00000394049 |
| ENSP00000345895 | ENSP00000361418 |
| ENSP00000345895 | ENSP00000379607 |
| ENSP00000345917 | ENSP00000346027 |
| ENSP00000345917 | ENSP00000346600 |
| ENSP00000345917 | ENSP00000350011 |
| ENSP00000345917 | ENSP00000351380 |
| ENSP00000345917 | ENSP00000354040 |
| ENSP00000345917 | ENSP00000356520 |
| ENSP00000345917 | ENSP00000356548 |
| ENSP00000345917 | ENSP00000358490 |
| ENSP00000345917 | ENSP00000358563 |
| ENSP00000345917 | ENSP00000360621 |
| ENSP00000345917 | ENSP00000360828 |
| ENSP00000345917 | ENSP00000362153 |
| ENSP00000345917 | ENSP00000370589 |
| ENSP00000345917 | ENSP00000370968 |
| ENSP00000345917 | ENSP00000375863 |
| ENSP00000345917 | ENSP00000377640 |
| ENSP00000345917 | ENSP00000379607 |
| ENSP00000345917 | ENSP00000384302 |
| ENSP00000345917 | ENSP00000402338 |
| ENSP00000345917 | ENSP00000412553 |
| ENSP00000345968 | ENSP00000376309 |
| ENSP00000345984 | ENSP00000358335 |

|                 |                 |
|-----------------|-----------------|
| ENSP00000345988 | ENSP00000347978 |
| ENSP00000345988 | ENSP00000354558 |
| ENSP00000345988 | ENSP00000361141 |
| ENSP00000345988 | ENSP00000363046 |
| ENSP00000345988 | ENSP00000370410 |
| ENSP00000345988 | ENSP00000373399 |
| ENSP00000346015 | ENSP00000346022 |
| ENSP00000346015 | ENSP00000346027 |
| ENSP00000346015 | ENSP00000346037 |
| ENSP00000346015 | ENSP00000346050 |
| ENSP00000346015 | ENSP00000346088 |
| ENSP00000346015 | ENSP00000346725 |
| ENSP00000346015 | ENSP00000354040 |
| ENSP00000346015 | ENSP00000354525 |
| ENSP00000346015 | ENSP00000354739 |
| ENSP00000346015 | ENSP00000359345 |
| ENSP00000346015 | ENSP00000360031 |
| ENSP00000346015 | ENSP00000361076 |
| ENSP00000346015 | ENSP00000362153 |
| ENSP00000346015 | ENSP00000362306 |
| ENSP00000346015 | ENSP00000362688 |
| ENSP00000346015 | ENSP00000362744 |
| ENSP00000346015 | ENSP00000363018 |
| ENSP00000346015 | ENSP00000363676 |
| ENSP00000346015 | ENSP00000364320 |
| ENSP00000346015 | ENSP00000369757 |
| ENSP00000346015 | ENSP00000370589 |
| ENSP00000346015 | ENSP00000372199 |
| ENSP00000346015 | ENSP00000373404 |
| ENSP00000346015 | ENSP00000375730 |
| ENSP00000346015 | ENSP00000377486 |
| ENSP00000346015 | ENSP00000377640 |
| ENSP00000346015 | ENSP00000377865 |
| ENSP00000346015 | ENSP00000378160 |
| ENSP00000346015 | ENSP00000379607 |
| ENSP00000346015 | ENSP00000379888 |
| ENSP00000346015 | ENSP00000380156 |
| ENSP00000346015 | ENSP00000386717 |
| ENSP00000346015 | ENSP00000389103 |
| ENSP00000346015 | ENSP00000391723 |
| ENSP00000346015 | ENSP00000393393 |
| ENSP00000346015 | ENSP00000402338 |
| ENSP00000346015 | ENSP00000410758 |
| ENSP00000346015 | ENSP00000414321 |
| ENSP00000346015 | ENSP00000417281 |
| ENSP00000346022 | ENSP00000346027 |

|                 |                 |
|-----------------|-----------------|
| ENSP00000346022 | ENSP00000346037 |
| ENSP00000346022 | ENSP00000346050 |
| ENSP00000346022 | ENSP00000346067 |
| ENSP00000346022 | ENSP00000346088 |
| ENSP00000346022 | ENSP00000354040 |
| ENSP00000346022 | ENSP00000354525 |
| ENSP00000346022 | ENSP00000354739 |
| ENSP00000346022 | ENSP00000359345 |
| ENSP00000346022 | ENSP00000360286 |
| ENSP00000346022 | ENSP00000361076 |
| ENSP00000346022 | ENSP00000361465 |
| ENSP00000346022 | ENSP00000362334 |
| ENSP00000346022 | ENSP00000363018 |
| ENSP00000346022 | ENSP00000363559 |
| ENSP00000346022 | ENSP00000363676 |
| ENSP00000346022 | ENSP00000364320 |
| ENSP00000346022 | ENSP00000369757 |
| ENSP00000346022 | ENSP00000370589 |
| ENSP00000346022 | ENSP00000373404 |
| ENSP00000346022 | ENSP00000375730 |
| ENSP00000346022 | ENSP00000376268 |
| ENSP00000346022 | ENSP00000376946 |
| ENSP00000346022 | ENSP00000377486 |
| ENSP00000346022 | ENSP00000377640 |
| ENSP00000346022 | ENSP00000377865 |
| ENSP00000346022 | ENSP00000378160 |
| ENSP00000346022 | ENSP00000378529 |
| ENSP00000346022 | ENSP00000378890 |
| ENSP00000346022 | ENSP00000379607 |
| ENSP00000346022 | ENSP00000379888 |
| ENSP00000346022 | ENSP00000380156 |
| ENSP00000346022 | ENSP00000386717 |
| ENSP00000346022 | ENSP00000389103 |
| ENSP00000346022 | ENSP00000392859 |
| ENSP00000346022 | ENSP00000393241 |
| ENSP00000346022 | ENSP00000393393 |
| ENSP00000346022 | ENSP00000403175 |
| ENSP00000346022 | ENSP00000408058 |
| ENSP00000346022 | ENSP00000412583 |
| ENSP00000346022 | ENSP00000414321 |
| ENSP00000346022 | ENSP00000416110 |
| ENSP00000346027 | ENSP00000346037 |
| ENSP00000346027 | ENSP00000346050 |
| ENSP00000346027 | ENSP00000346088 |
| ENSP00000346027 | ENSP00000354525 |
| ENSP00000346027 | ENSP00000354739 |

|                 |                 |
|-----------------|-----------------|
| ENSP00000346027 | ENSP00000359345 |
| ENSP00000346027 | ENSP00000360922 |
| ENSP00000346027 | ENSP00000361076 |
| ENSP00000346027 | ENSP00000363018 |
| ENSP00000346027 | ENSP00000363676 |
| ENSP00000346027 | ENSP00000364320 |
| ENSP00000346027 | ENSP00000369757 |
| ENSP00000346027 | ENSP00000370589 |
| ENSP00000346027 | ENSP00000373404 |
| ENSP00000346027 | ENSP00000375730 |
| ENSP00000346027 | ENSP00000377640 |
| ENSP00000346027 | ENSP00000377865 |
| ENSP00000346027 | ENSP00000378160 |
| ENSP00000346027 | ENSP00000379607 |
| ENSP00000346027 | ENSP00000380156 |
| ENSP00000346027 | ENSP00000386717 |
| ENSP00000346027 | ENSP00000389103 |
| ENSP00000346027 | ENSP00000391723 |
| ENSP00000346027 | ENSP00000391944 |
| ENSP00000346027 | ENSP00000393393 |
| ENSP00000346027 | ENSP00000414321 |
| ENSP00000346037 | ENSP00000346050 |
| ENSP00000346037 | ENSP00000346088 |
| ENSP00000346037 | ENSP00000354525 |
| ENSP00000346037 | ENSP00000354739 |
| ENSP00000346037 | ENSP00000359345 |
| ENSP00000346037 | ENSP00000361076 |
| ENSP00000346037 | ENSP00000363018 |
| ENSP00000346037 | ENSP00000363676 |
| ENSP00000346037 | ENSP00000364320 |
| ENSP00000346037 | ENSP00000373404 |
| ENSP00000346037 | ENSP00000375730 |
| ENSP00000346037 | ENSP00000377640 |
| ENSP00000346037 | ENSP00000377865 |
| ENSP00000346037 | ENSP00000378160 |
| ENSP00000346037 | ENSP00000379607 |
| ENSP00000346037 | ENSP00000380156 |
| ENSP00000346037 | ENSP00000381293 |
| ENSP00000346037 | ENSP00000386717 |
| ENSP00000346037 | ENSP00000389103 |
| ENSP00000346037 | ENSP00000393393 |
| ENSP00000346037 | ENSP00000414321 |
| ENSP00000346050 | ENSP00000346067 |
| ENSP00000346050 | ENSP00000346120 |
| ENSP00000346050 | ENSP00000346453 |
| ENSP00000346050 | ENSP00000347087 |



|                 |                 |
|-----------------|-----------------|
| ENSP00000346050 | ENSP00000352738 |
| ENSP00000346050 | ENSP00000354525 |
| ENSP00000346050 | ENSP00000354739 |
| ENSP00000346050 | ENSP00000355759 |
| ENSP00000346050 | ENSP00000360031 |
| ENSP00000346050 | ENSP00000360922 |
| ENSP00000346050 | ENSP00000361076 |
| ENSP00000346050 | ENSP00000361686 |
| ENSP00000346050 | ENSP00000362306 |
| ENSP00000346050 | ENSP00000362744 |
| ENSP00000346050 | ENSP00000363018 |
| ENSP00000346050 | ENSP00000363308 |
| ENSP00000346050 | ENSP00000363676 |
| ENSP00000346050 | ENSP00000364320 |
| ENSP00000346050 | ENSP00000367878 |
| ENSP00000346050 | ENSP00000369757 |
| ENSP00000346050 | ENSP00000373404 |
| ENSP00000346050 | ENSP00000375730 |
| ENSP00000346050 | ENSP00000376250 |
| ENSP00000346050 | ENSP00000377640 |
| ENSP00000346050 | ENSP00000379339 |
| ENSP00000346050 | ENSP00000379607 |
| ENSP00000346050 | ENSP00000379888 |
| ENSP00000346050 | ENSP00000380156 |
| ENSP00000346050 | ENSP00000386717 |
| ENSP00000346050 | ENSP00000389103 |
| ENSP00000346050 | ENSP00000391723 |
| ENSP00000346050 | ENSP00000393241 |
| ENSP00000346050 | ENSP00000402338 |
| ENSP00000346050 | ENSP00000403175 |
| ENSP00000346050 | ENSP00000412583 |
| ENSP00000346050 | ENSP00000414321 |
| ENSP00000346050 | ENSP00000416110 |
| ENSP00000346050 | ENSP00000420714 |
| ENSP00000346065 | ENSP00000349208 |
| ENSP00000346065 | ENSP00000356846 |
| ENSP00000346065 | ENSP00000357812 |
| ENSP00000346065 | ENSP00000387303 |
| ENSP00000346065 | ENSP00000393275 |
| ENSP00000346067 | ENSP00000346453 |
| ENSP00000346067 | ENSP00000348722 |
| ENSP00000346067 | ENSP00000350249 |
| ENSP00000346067 | ENSP00000355077 |
| ENSP00000346067 | ENSP00000355471 |
| ENSP00000346067 | ENSP00000356134 |
| ENSP00000346067 | ENSP00000358140 |

|                 |                 |
|-----------------|-----------------|
| ENSP00000346067 | ENSP00000358812 |
| ENSP00000346067 | ENSP00000360116 |
| ENSP00000346067 | ENSP00000361076 |
| ENSP00000346067 | ENSP00000361465 |
| ENSP00000346067 | ENSP00000361894 |
| ENSP00000346067 | ENSP00000362036 |
| ENSP00000346067 | ENSP00000362135 |
| ENSP00000346067 | ENSP00000362576 |
| ENSP00000346067 | ENSP00000362744 |
| ENSP00000346067 | ENSP00000363018 |
| ENSP00000346067 | ENSP00000363135 |
| ENSP00000346067 | ENSP00000363308 |
| ENSP00000346067 | ENSP00000364119 |
| ENSP00000346067 | ENSP00000364320 |
| ENSP00000346067 | ENSP00000368790 |
| ENSP00000346067 | ENSP00000369757 |
| ENSP00000346067 | ENSP00000370258 |
| ENSP00000346067 | ENSP00000370935 |
| ENSP00000346067 | ENSP00000372445 |
| ENSP00000346067 | ENSP00000377486 |
| ENSP00000346067 | ENSP00000377496 |
| ENSP00000346067 | ENSP00000377640 |
| ENSP00000346067 | ENSP00000377865 |
| ENSP00000346067 | ENSP00000379339 |
| ENSP00000346067 | ENSP00000379888 |
| ENSP00000346067 | ENSP00000393241 |
| ENSP00000346067 | ENSP00000403175 |
| ENSP00000346067 | ENSP00000412583 |
| ENSP00000346067 | ENSP00000414321 |
| ENSP00000346067 | ENSP00000416110 |
| ENSP00000346067 | ENSP00000420714 |
| ENSP00000346088 | ENSP00000354525 |
| ENSP00000346088 | ENSP00000354739 |
| ENSP00000346088 | ENSP00000355759 |
| ENSP00000346088 | ENSP00000359345 |
| ENSP00000346088 | ENSP00000360532 |
| ENSP00000346088 | ENSP00000361076 |
| ENSP00000346088 | ENSP00000363018 |
| ENSP00000346088 | ENSP00000363559 |
| ENSP00000346088 | ENSP00000363676 |
| ENSP00000346088 | ENSP00000364320 |
| ENSP00000346088 | ENSP00000365439 |
| ENSP00000346088 | ENSP00000373404 |
| ENSP00000346088 | ENSP00000375730 |
| ENSP00000346088 | ENSP00000377640 |
| ENSP00000346088 | ENSP00000377865 |

|                 |                 |
|-----------------|-----------------|
| ENSP00000346088 | ENSP00000378160 |
| ENSP00000346088 | ENSP00000379607 |
| ENSP00000346088 | ENSP00000380156 |
| ENSP00000346088 | ENSP00000386717 |
| ENSP00000346088 | ENSP00000389103 |
| ENSP00000346088 | ENSP00000393393 |
| ENSP00000346088 | ENSP00000401371 |
| ENSP00000346088 | ENSP00000408058 |
| ENSP00000346112 | ENSP00000348278 |
| ENSP00000346120 | ENSP00000346725 |
| ENSP00000346120 | ENSP00000350009 |
| ENSP00000346120 | ENSP00000353246 |
| ENSP00000346120 | ENSP00000354040 |
| ENSP00000346120 | ENSP00000354522 |
| ENSP00000346120 | ENSP00000354673 |
| ENSP00000346120 | ENSP00000355050 |
| ENSP00000346120 | ENSP00000356520 |
| ENSP00000346120 | ENSP00000356548 |
| ENSP00000346120 | ENSP00000358563 |
| ENSP00000346120 | ENSP00000358605 |
| ENSP00000346120 | ENSP00000358812 |
| ENSP00000346120 | ENSP00000359345 |
| ENSP00000346120 | ENSP00000360031 |
| ENSP00000346120 | ENSP00000360412 |
| ENSP00000346120 | ENSP00000361010 |
| ENSP00000346120 | ENSP00000361076 |
| ENSP00000346120 | ENSP00000361232 |
| ENSP00000346120 | ENSP00000361465 |
| ENSP00000346120 | ENSP00000362153 |
| ENSP00000346120 | ENSP00000363676 |
| ENSP00000346120 | ENSP00000363944 |
| ENSP00000346120 | ENSP00000366135 |
| ENSP00000346120 | ENSP00000370589 |
| ENSP00000346120 | ENSP00000371101 |
| ENSP00000346120 | ENSP00000372199 |
| ENSP00000346120 | ENSP00000378160 |
| ENSP00000346120 | ENSP00000379339 |
| ENSP00000346120 | ENSP00000379607 |
| ENSP00000346120 | ENSP00000379888 |
| ENSP00000346120 | ENSP00000380982 |
| ENSP00000346120 | ENSP00000381657 |
| ENSP00000346120 | ENSP00000389103 |
| ENSP00000346120 | ENSP00000393953 |
| ENSP00000346120 | ENSP00000402338 |
| ENSP00000346120 | ENSP00000403817 |
| ENSP00000346120 | ENSP00000420714 |

|                 |                 |
|-----------------|-----------------|
| ENSP00000346130 | ENSP00000362656 |
| ENSP00000346130 | ENSP00000366395 |
| ENSP00000346130 | ENSP00000381282 |
| ENSP00000346139 | ENSP00000347134 |
| ENSP00000346139 | ENSP00000370719 |
| ENSP00000346142 | ENSP00000347206 |
| ENSP00000346142 | ENSP00000358417 |
| ENSP00000346142 | ENSP00000359224 |
| ENSP00000346142 | ENSP00000360149 |
| ENSP00000346142 | ENSP00000361047 |
| ENSP00000346142 | ENSP00000374213 |
| ENSP00000346142 | ENSP00000401435 |
| ENSP00000346155 | ENSP00000346762 |
| ENSP00000346155 | ENSP00000348577 |
| ENSP00000346155 | ENSP00000349887 |
| ENSP00000346155 | ENSP00000351908 |
| ENSP00000346155 | ENSP00000352219 |
| ENSP00000346155 | ENSP00000354532 |
| ENSP00000346155 | ENSP00000362751 |
| ENSP00000346155 | ENSP00000369519 |
| ENSP00000346155 | ENSP00000369862 |
| ENSP00000346155 | ENSP00000401508 |
| ENSP00000346155 | ENSP00000414330 |
| ENSP00000346173 | ENSP00000355890 |
| ENSP00000346173 | ENSP00000366482 |
| ENSP00000346206 | ENSP00000378546 |
| ENSP00000346206 | ENSP00000380969 |
| ENSP00000346206 | ENSP00000395701 |
| ENSP00000346236 | ENSP00000353246 |
| ENSP00000346236 | ENSP00000357631 |
| ENSP00000346236 | ENSP00000358812 |
| ENSP00000346236 | ENSP00000359484 |
| ENSP00000346236 | ENSP00000360412 |
| ENSP00000346236 | ENSP00000364289 |
| ENSP00000346236 | ENSP00000365145 |
| ENSP00000346236 | ENSP00000370256 |
| ENSP00000346236 | ENSP00000377262 |
| ENSP00000346240 | ENSP00000393887 |
| ENSP00000346255 | ENSP00000369860 |
| ENSP00000346255 | ENSP00000376268 |
| ENSP00000346340 | ENSP00000350512 |
| ENSP00000346340 | ENSP00000356641 |
| ENSP00000346340 | ENSP00000360286 |
| ENSP00000346340 | ENSP00000370258 |
| ENSP00000346345 | ENSP00000373600 |
| ENSP00000346437 | ENSP00000346566 |

|                 |                 |
|-----------------|-----------------|
| ENSP00000346437 | ENSP00000349785 |
| ENSP00000346437 | ENSP00000354673 |
| ENSP00000346437 | ENSP00000358478 |
| ENSP00000346437 | ENSP00000359939 |
| ENSP00000346437 | ENSP00000371607 |
| ENSP00000346437 | ENSP00000374455 |
| ENSP00000346437 | ENSP00000377218 |
| ENSP00000346437 | ENSP00000388320 |
| ENSP00000346453 | ENSP00000346566 |
| ENSP00000346453 | ENSP00000348564 |
| ENSP00000346453 | ENSP00000350199 |
| ENSP00000346453 | ENSP00000350967 |
| ENSP00000346453 | ENSP00000353741 |
| ENSP00000346453 | ENSP00000354742 |
| ENSP00000346453 | ENSP00000354812 |
| ENSP00000346453 | ENSP00000354957 |
| ENSP00000346453 | ENSP00000355136 |
| ENSP00000346453 | ENSP00000357748 |
| ENSP00000346453 | ENSP00000358737 |
| ENSP00000346453 | ENSP00000359000 |
| ENSP00000346453 | ENSP00000359305 |
| ENSP00000346453 | ENSP00000360031 |
| ENSP00000346453 | ENSP00000360286 |
| ENSP00000346453 | ENSP00000360782 |
| ENSP00000346453 | ENSP00000360916 |
| ENSP00000346453 | ENSP00000361076 |
| ENSP00000346453 | ENSP00000361949 |
| ENSP00000346453 | ENSP00000362592 |
| ENSP00000346453 | ENSP00000363779 |
| ENSP00000346453 | ENSP00000365811 |
| ENSP00000346453 | ENSP00000365837 |
| ENSP00000346453 | ENSP00000366974 |
| ENSP00000346453 | ENSP00000369042 |
| ENSP00000346453 | ENSP00000369695 |
| ENSP00000346453 | ENSP00000369757 |
| ENSP00000346453 | ENSP00000370589 |
| ENSP00000346453 | ENSP00000372689 |
| ENSP00000346453 | ENSP00000377655 |
| ENSP00000346453 | ENSP00000377865 |
| ENSP00000346453 | ENSP00000378529 |
| ENSP00000346453 | ENSP00000379888 |
| ENSP00000346453 | ENSP00000386165 |
| ENSP00000346453 | ENSP00000386992 |
| ENSP00000346453 | ENSP00000389103 |
| ENSP00000346453 | ENSP00000394382 |
| ENSP00000346453 | ENSP00000394791 |

|                 |                 |
|-----------------|-----------------|
| ENSP00000346453 | ENSP00000402527 |
| ENSP00000346453 | ENSP00000417132 |
| ENSP00000346483 | ENSP00000358283 |
| ENSP00000346550 | ENSP00000368391 |
| ENSP00000346550 | ENSP00000373600 |
| ENSP00000346566 | ENSP00000347076 |
| ENSP00000346566 | ENSP00000347232 |
| ENSP00000346566 | ENSP00000347719 |
| ENSP00000346566 | ENSP00000347733 |
| ENSP00000346566 | ENSP00000348565 |
| ENSP00000346566 | ENSP00000349959 |
| ENSP00000346566 | ENSP00000350491 |
| ENSP00000346566 | ENSP00000351665 |
| ENSP00000346566 | ENSP00000352121 |
| ENSP00000346566 | ENSP00000353793 |
| ENSP00000346566 | ENSP00000354340 |
| ENSP00000346566 | ENSP00000354522 |
| ENSP00000346566 | ENSP00000354558 |
| ENSP00000346566 | ENSP00000354720 |
| ENSP00000346566 | ENSP00000354723 |
| ENSP00000346566 | ENSP00000354851 |
| ENSP00000346566 | ENSP00000354916 |
| ENSP00000346566 | ENSP00000355560 |
| ENSP00000346566 | ENSP00000356319 |
| ENSP00000346566 | ENSP00000356579 |
| ENSP00000346566 | ENSP00000357651 |
| ENSP00000346566 | ENSP00000360473 |
| ENSP00000346566 | ENSP00000360532 |
| ENSP00000346566 | ENSP00000366974 |
| ENSP00000346566 | ENSP00000368976 |
| ENSP00000346566 | ENSP00000374069 |
| ENSP00000346566 | ENSP00000374566 |
| ENSP00000346566 | ENSP00000376946 |
| ENSP00000346566 | ENSP00000377262 |
| ENSP00000346566 | ENSP00000377793 |
| ENSP00000346566 | ENSP00000382562 |
| ENSP00000346566 | ENSP00000417281 |
| ENSP00000346577 | ENSP00000362993 |
| ENSP00000346577 | ENSP00000414187 |
| ENSP00000346599 | ENSP00000364320 |
| ENSP00000346634 | ENSP00000350249 |
| ENSP00000346634 | ENSP00000355759 |
| ENSP00000346634 | ENSP00000360532 |
| ENSP00000346634 | ENSP00000370083 |
| ENSP00000346634 | ENSP00000370119 |
| ENSP00000346634 | ENSP00000379607 |

|                 |                 |
|-----------------|-----------------|
| ENSP00000346697 | ENSP00000354901 |
| ENSP00000346697 | ENSP00000358022 |
| ENSP00000346697 | ENSP00000370047 |
| ENSP00000346697 | ENSP00000382177 |
| ENSP00000346725 | ENSP00000348596 |
| ENSP00000346725 | ENSP00000351644 |
| ENSP00000346725 | ENSP00000352021 |
| ENSP00000346725 | ENSP00000352308 |
| ENSP00000346725 | ENSP00000353246 |
| ENSP00000346725 | ENSP00000354040 |
| ENSP00000346725 | ENSP00000355899 |
| ENSP00000346725 | ENSP00000356290 |
| ENSP00000346725 | ENSP00000356920 |
| ENSP00000346725 | ENSP00000358400 |
| ENSP00000346725 | ENSP00000358563 |
| ENSP00000346725 | ENSP00000358812 |
| ENSP00000346725 | ENSP00000359345 |
| ENSP00000346725 | ENSP00000359688 |
| ENSP00000346725 | ENSP00000360412 |
| ENSP00000346725 | ENSP00000360621 |
| ENSP00000346725 | ENSP00000360828 |
| ENSP00000346725 | ENSP00000361076 |
| ENSP00000346725 | ENSP00000361232 |
| ENSP00000346725 | ENSP00000361982 |
| ENSP00000346725 | ENSP00000362153 |
| ENSP00000346725 | ENSP00000362171 |
| ENSP00000346725 | ENSP00000362744 |
| ENSP00000346725 | ENSP00000363018 |
| ENSP00000346725 | ENSP00000363384 |
| ENSP00000346725 | ENSP00000363559 |
| ENSP00000346725 | ENSP00000363676 |
| ENSP00000346725 | ENSP00000364119 |
| ENSP00000346725 | ENSP00000364320 |
| ENSP00000346725 | ENSP00000365806 |
| ENSP00000346725 | ENSP00000365811 |
| ENSP00000346725 | ENSP00000366519 |
| ENSP00000346725 | ENSP00000366557 |
| ENSP00000346725 | ENSP00000368612 |
| ENSP00000346725 | ENSP00000368887 |
| ENSP00000346725 | ENSP00000370589 |
| ENSP00000346725 | ENSP00000371201 |
| ENSP00000346725 | ENSP00000372199 |
| ENSP00000346725 | ENSP00000373090 |
| ENSP00000346725 | ENSP00000373404 |
| ENSP00000346725 | ENSP00000377640 |
| ENSP00000346725 | ENSP00000377865 |

|                 |                 |
|-----------------|-----------------|
| ENSP00000346725 | ENSP00000379888 |
| ENSP00000346725 | ENSP00000380271 |
| ENSP00000346725 | ENSP00000380495 |
| ENSP00000346725 | ENSP00000382392 |
| ENSP00000346725 | ENSP00000386717 |
| ENSP00000346725 | ENSP00000388464 |
| ENSP00000346725 | ENSP00000389103 |
| ENSP00000346725 | ENSP00000393241 |
| ENSP00000346725 | ENSP00000393393 |
| ENSP00000346725 | ENSP00000394290 |
| ENSP00000346725 | ENSP00000402338 |
| ENSP00000346725 | ENSP00000403175 |
| ENSP00000346725 | ENSP00000403576 |
| ENSP00000346725 | ENSP00000409074 |
| ENSP00000346725 | ENSP00000409367 |
| ENSP00000346725 | ENSP00000411162 |
| ENSP00000346725 | ENSP00000412583 |
| ENSP00000346725 | ENSP00000413632 |
| ENSP00000346725 | ENSP00000414321 |
| ENSP00000346725 | ENSP00000416110 |
| ENSP00000346725 | ENSP00000419740 |
| ENSP00000346733 | ENSP00000359484 |
| ENSP00000346733 | ENSP00000376794 |
| ENSP00000346762 | ENSP00000348168 |
| ENSP00000346762 | ENSP00000348565 |
| ENSP00000346762 | ENSP00000356520 |
| ENSP00000346762 | ENSP00000362608 |
| ENSP00000346762 | ENSP00000401371 |
| ENSP00000346791 | ENSP00000371451 |
| ENSP00000346791 | ENSP00000381045 |
| ENSP00000346791 | ENSP00000404381 |
| ENSP00000346809 | ENSP00000350263 |
| ENSP00000346809 | ENSP00000357048 |
| ENSP00000346809 | ENSP00000359848 |
| ENSP00000346809 | ENSP00000360149 |
| ENSP00000346809 | ENSP00000360644 |
| ENSP00000346809 | ENSP00000362298 |
| ENSP00000346809 | ENSP00000397441 |
| ENSP00000346809 | ENSP00000402240 |
| ENSP00000346809 | ENSP00000415203 |
| ENSP00000346829 | ENSP00000353854 |
| ENSP00000346829 | ENSP00000359634 |
| ENSP00000346839 | ENSP00000355866 |
| ENSP00000346839 | ENSP00000356694 |
| ENSP00000346839 | ENSP00000361405 |
| ENSP00000346839 | ENSP00000363548 |



|                 |                 |
|-----------------|-----------------|
| ENSP00000346839 | ENSP00000363827 |
| ENSP00000346839 | ENSP00000384169 |
| ENSP00000346874 | ENSP00000349016 |
| ENSP00000346874 | ENSP00000360515 |
| ENSP00000346874 | ENSP00000364289 |
| ENSP00000346874 | ENSP00000366135 |
| ENSP00000346874 | ENSP00000369042 |
| ENSP00000346879 | ENSP00000355775 |
| ENSP00000346879 | ENSP00000365899 |
| ENSP00000346879 | ENSP00000376611 |
| ENSP00000346879 | ENSP00000399968 |
| ENSP00000346886 | ENSP00000357914 |
| ENSP00000346886 | ENSP00000362762 |
| ENSP00000346886 | ENSP00000367440 |
| ENSP00000346886 | ENSP00000404623 |
| ENSP00000346986 | ENSP00000348010 |
| ENSP00000346986 | ENSP00000351492 |
| ENSP00000346986 | ENSP00000358140 |
| ENSP00000346986 | ENSP00000360532 |
| ENSP00000346986 | ENSP00000361577 |
| ENSP00000346986 | ENSP00000362424 |
| ENSP00000346986 | ENSP00000363559 |
| ENSP00000346986 | ENSP00000364289 |
| ENSP00000346986 | ENSP00000366557 |
| ENSP00000346986 | ENSP00000376973 |
| ENSP00000346986 | ENSP00000383059 |
| ENSP00000346986 | ENSP00000400591 |
| ENSP00000346986 | ENSP00000412566 |
| ENSP00000346987 | ENSP00000348554 |
| ENSP00000346987 | ENSP00000363322 |
| ENSP00000346987 | ENSP00000378350 |
| ENSP00000346987 | ENSP00000394394 |
| ENSP00000347038 | ENSP00000357887 |
| ENSP00000347038 | ENSP00000359518 |
| ENSP00000347076 | ENSP00000370719 |
| ENSP00000347076 | ENSP00000388373 |
| ENSP00000347087 | ENSP00000349208 |
| ENSP00000347087 | ENSP00000350512 |
| ENSP00000347087 | ENSP00000352738 |
| ENSP00000347087 | ENSP00000354040 |
| ENSP00000347087 | ENSP00000356846 |
| ENSP00000347087 | ENSP00000358812 |
| ENSP00000347087 | ENSP00000360412 |
| ENSP00000347087 | ENSP00000361232 |
| ENSP00000347087 | ENSP00000361577 |
| ENSP00000347087 | ENSP00000362900 |

|                 |                 |
|-----------------|-----------------|
| ENSP00000347087 | ENSP00000363308 |
| ENSP00000347087 | ENSP00000363676 |
| ENSP00000347087 | ENSP00000372445 |
| ENSP00000347087 | ENSP00000373715 |
| ENSP00000347087 | ENSP00000377262 |
| ENSP00000347087 | ENSP00000379607 |
| ENSP00000347087 | ENSP00000379888 |
| ENSP00000347087 | ENSP00000393275 |
| ENSP00000347087 | ENSP00000412566 |
| ENSP00000347087 | ENSP00000414321 |
| ENSP00000347087 | ENSP00000417229 |
| ENSP00000347134 | ENSP00000350009 |
| ENSP00000347134 | ENSP00000353741 |
| ENSP00000347134 | ENSP00000354558 |
| ENSP00000347134 | ENSP00000355090 |
| ENSP00000347134 | ENSP00000358810 |
| ENSP00000347134 | ENSP00000359552 |
| ENSP00000347140 | ENSP00000353393 |
| ENSP00000347140 | ENSP00000366395 |
| ENSP00000347168 | ENSP00000348577 |
| ENSP00000347168 | ENSP00000351284 |
| ENSP00000347168 | ENSP00000352257 |
| ENSP00000347168 | ENSP00000353622 |
| ENSP00000347168 | ENSP00000354720 |
| ENSP00000347168 | ENSP00000360621 |
| ENSP00000347168 | ENSP00000361465 |
| ENSP00000347168 | ENSP00000363779 |
| ENSP00000347168 | ENSP00000368438 |
| ENSP00000347168 | ENSP00000372023 |
| ENSP00000347168 | ENSP00000374213 |
| ENSP00000347168 | ENSP00000377793 |
| ENSP00000347168 | ENSP00000379607 |
| ENSP00000347168 | ENSP00000381657 |
| ENSP00000347168 | ENSP00000382688 |
| ENSP00000347168 | ENSP00000386759 |
| ENSP00000347168 | ENSP00000411409 |
| ENSP00000347169 | ENSP00000351926 |
| ENSP00000347169 | ENSP00000356257 |
| ENSP00000347169 | ENSP00000360798 |
| ENSP00000347169 | ENSP00000363921 |
| ENSP00000347169 | ENSP00000366748 |
| ENSP00000347169 | ENSP00000380256 |
| ENSP00000347169 | ENSP00000382518 |
| ENSP00000347169 | ENSP00000386456 |
| ENSP00000347169 | ENSP00000414670 |
| ENSP00000347169 | ENSP00000417281 |

|                 |                 |
|-----------------|-----------------|
| ENSP00000347170 | ENSP00000367787 |
| ENSP00000347184 | ENSP00000352257 |
| ENSP00000347184 | ENSP00000353622 |
| ENSP00000347184 | ENSP00000356448 |
| ENSP00000347184 | ENSP00000356489 |
| ENSP00000347184 | ENSP00000357965 |
| ENSP00000347184 | ENSP00000359206 |
| ENSP00000347184 | ENSP00000361949 |
| ENSP00000347184 | ENSP00000363779 |
| ENSP00000347184 | ENSP00000366395 |
| ENSP00000347184 | ENSP00000369716 |
| ENSP00000347184 | ENSP00000374455 |
| ENSP00000347184 | ENSP00000377944 |
| ENSP00000347184 | ENSP00000378180 |
| ENSP00000347184 | ENSP00000378338 |
| ENSP00000347184 | ENSP00000384474 |
| ENSP00000347184 | ENSP00000386200 |
| ENSP00000347184 | ENSP00000386759 |
| ENSP00000347184 | ENSP00000403397 |
| ENSP00000347184 | ENSP00000404658 |
| ENSP00000347206 | ENSP00000348877 |
| ENSP00000347206 | ENSP00000351492 |
| ENSP00000347206 | ENSP00000359848 |
| ENSP00000347206 | ENSP00000367408 |
| ENSP00000347206 | ENSP00000375881 |
| ENSP00000347206 | ENSP00000401435 |
| ENSP00000347206 | ENSP00000412064 |
| ENSP00000347232 | ENSP00000347978 |
| ENSP00000347232 | ENSP00000348020 |
| ENSP00000347232 | ENSP00000349393 |
| ENSP00000347232 | ENSP00000349640 |
| ENSP00000347232 | ENSP00000350283 |
| ENSP00000347232 | ENSP00000351284 |
| ENSP00000347232 | ENSP00000351885 |
| ENSP00000347232 | ENSP00000352257 |
| ENSP00000347232 | ENSP00000352271 |
| ENSP00000347232 | ENSP00000353793 |
| ENSP00000347232 | ENSP00000354522 |
| ENSP00000347232 | ENSP00000358019 |
| ENSP00000347232 | ENSP00000358478 |
| ENSP00000347232 | ENSP00000359454 |
| ENSP00000347232 | ENSP00000360310 |
| ENSP00000347232 | ENSP00000363021 |
| ENSP00000347232 | ENSP00000367029 |
| ENSP00000347232 | ENSP00000367910 |
| ENSP00000347232 | ENSP00000368646 |

|                 |                 |
|-----------------|-----------------|
| ENSP00000347232 | ENSP00000369335 |
| ENSP00000347232 | ENSP00000369411 |
| ENSP00000347232 | ENSP00000370150 |
| ENSP00000347232 | ENSP00000370151 |
| ENSP00000347232 | ENSP00000371475 |
| ENSP00000347232 | ENSP00000372023 |
| ENSP00000347232 | ENSP00000373952 |
| ENSP00000347232 | ENSP00000375809 |
| ENSP00000347232 | ENSP00000377655 |
| ENSP00000347232 | ENSP00000384048 |
| ENSP00000347232 | ENSP00000389709 |
| ENSP00000347232 | ENSP00000394649 |
| ENSP00000347232 | ENSP00000394791 |
| ENSP00000347232 | ENSP00000396704 |
| ENSP00000347232 | ENSP00000397830 |
| ENSP00000347232 | ENSP00000402527 |
| ENSP00000347232 | ENSP00000406868 |
| ENSP00000347232 | ENSP00000407047 |
| ENSP00000347294 | ENSP00000348632 |
| ENSP00000347294 | ENSP00000359567 |
| ENSP00000347294 | ENSP00000362441 |
| ENSP00000347294 | ENSP00000364524 |
| ENSP00000347294 | ENSP00000365025 |
| ENSP00000347294 | ENSP00000381698 |
| ENSP00000347294 | ENSP00000386520 |
| ENSP00000347294 | ENSP00000391774 |
| ENSP00000347301 | ENSP00000354270 |
| ENSP00000347301 | ENSP00000356574 |
| ENSP00000347301 | ENSP00000396976 |
| ENSP00000347301 | ENSP00000413520 |
| ENSP00000347314 | ENSP00000348965 |
| ENSP00000347314 | ENSP00000350012 |
| ENSP00000347314 | ENSP00000357048 |
| ENSP00000347314 | ENSP00000360798 |
| ENSP00000347314 | ENSP00000370023 |
| ENSP00000347329 | ENSP00000356530 |
| ENSP00000347329 | ENSP00000362208 |
| ENSP00000347329 | ENSP00000362807 |
| ENSP00000347329 | ENSP00000366746 |
| ENSP00000347329 | ENSP00000401445 |
| ENSP00000347329 | ENSP00000417764 |
| ENSP00000347345 | ENSP00000356146 |
| ENSP00000347345 | ENSP00000357048 |
| ENSP00000347345 | ENSP00000358497 |
| ENSP00000347345 | ENSP00000359290 |
| ENSP00000347345 | ENSP00000359531 |

|                 |                 |
|-----------------|-----------------|
| ENSP00000347345 | ENSP00000360286 |
| ENSP00000347345 | ENSP00000361465 |
| ENSP00000347345 | ENSP00000364320 |
| ENSP00000347345 | ENSP00000366828 |
| ENSP00000347345 | ENSP00000369695 |
| ENSP00000347345 | ENSP00000370258 |
| ENSP00000347345 | ENSP00000377969 |
| ENSP00000347345 | ENSP00000378736 |
| ENSP00000347345 | ENSP00000382058 |
| ENSP00000347345 | ENSP00000383503 |
| ENSP00000347345 | ENSP00000397636 |
| ENSP00000347345 | ENSP00000403852 |
| ENSP00000347345 | ENSP00000405636 |
| ENSP00000347345 | ENSP00000406293 |
| ENSP00000347345 | ENSP00000410530 |
| ENSP00000347345 | ENSP00000410954 |
| ENSP00000347345 | ENSP00000414110 |
| ENSP00000347345 | ENSP00000416599 |
| ENSP00000347379 | ENSP00000360798 |
| ENSP00000347379 | ENSP00000365025 |
| ENSP00000347408 | ENSP00000352603 |
| ENSP00000347408 | ENSP00000356146 |
| ENSP00000347408 | ENSP00000360183 |
| ENSP00000347408 | ENSP00000360798 |
| ENSP00000347408 | ENSP00000365837 |
| ENSP00000347408 | ENSP00000366603 |
| ENSP00000347408 | ENSP00000372654 |
| ENSP00000347408 | ENSP00000377148 |
| ENSP00000347408 | ENSP00000377769 |
| ENSP00000347408 | ENSP00000397441 |
| ENSP00000347444 | ENSP00000356846 |
| ENSP00000347444 | ENSP00000357914 |
| ENSP00000347444 | ENSP00000360060 |
| ENSP00000347444 | ENSP00000366843 |
| ENSP00000347495 | ENSP00000352928 |
| ENSP00000347495 | ENSP00000358478 |
| ENSP00000347495 | ENSP00000361557 |
| ENSP00000347495 | ENSP00000367086 |
| ENSP00000347495 | ENSP00000367615 |
| ENSP00000347495 | ENSP00000367923 |
| ENSP00000347495 | ENSP00000391432 |
| ENSP00000347498 | ENSP00000354673 |
| ENSP00000347498 | ENSP00000357048 |
| ENSP00000347498 | ENSP00000360183 |
| ENSP00000347498 | ENSP00000373301 |
| ENSP00000347498 | ENSP00000380460 |

|                 |                 |
|-----------------|-----------------|
| ENSP00000347504 | ENSP00000379457 |
| ENSP00000347538 | ENSP00000400806 |
| ENSP00000347548 | ENSP00000352706 |
| ENSP00000347548 | ENSP00000363972 |
| ENSP00000347548 | ENSP00000368439 |
| ENSP00000347548 | ENSP00000368605 |
| ENSP00000347581 | ENSP00000349959 |
| ENSP00000347581 | ENSP00000362306 |
| ENSP00000347592 | ENSP00000360488 |
| ENSP00000347592 | ENSP00000369218 |
| ENSP00000347602 | ENSP00000348784 |
| ENSP00000347602 | ENSP00000349213 |
| ENSP00000347602 | ENSP00000350767 |
| ENSP00000347602 | ENSP00000353622 |
| ENSP00000347602 | ENSP00000356989 |
| ENSP00000347602 | ENSP00000360473 |
| ENSP00000347602 | ENSP00000362166 |
| ENSP00000347602 | ENSP00000362592 |
| ENSP00000347602 | ENSP00000369695 |
| ENSP00000347602 | ENSP00000371888 |
| ENSP00000347602 | ENSP00000377262 |
| ENSP00000347602 | ENSP00000386759 |
| ENSP00000347602 | ENSP00000392617 |
| ENSP00000347626 | ENSP00000348965 |
| ENSP00000347626 | ENSP00000354791 |
| ENSP00000347719 | ENSP00000350249 |
| ENSP00000347719 | ENSP00000351665 |
| ENSP00000347719 | ENSP00000354158 |
| ENSP00000347719 | ENSP00000354720 |
| ENSP00000347719 | ENSP00000354791 |
| ENSP00000347719 | ENSP00000355205 |
| ENSP00000347719 | ENSP00000355560 |
| ENSP00000347719 | ENSP00000355922 |
| ENSP00000347719 | ENSP00000356579 |
| ENSP00000347719 | ENSP00000356989 |
| ENSP00000347719 | ENSP00000357643 |
| ENSP00000347719 | ENSP00000357887 |
| ENSP00000347719 | ENSP00000360473 |
| ENSP00000347719 | ENSP00000363734 |
| ENSP00000347719 | ENSP00000369411 |
| ENSP00000347719 | ENSP00000369736 |
| ENSP00000347719 | ENSP00000370151 |
| ENSP00000347719 | ENSP00000372694 |
| ENSP00000347719 | ENSP00000374213 |
| ENSP00000347719 | ENSP00000374566 |
| ENSP00000347719 | ENSP00000376946 |

|                 |                 |
|-----------------|-----------------|
| ENSP00000347719 | ENSP00000377496 |
| ENSP00000347719 | ENSP00000377793 |
| ENSP00000347719 | ENSP00000380460 |
| ENSP00000347719 | ENSP00000381198 |
| ENSP00000347719 | ENSP00000382562 |
| ENSP00000347719 | ENSP00000383402 |
| ENSP00000347719 | ENSP00000412319 |
| ENSP00000347719 | ENSP00000415678 |
| ENSP00000347719 | ENSP00000417963 |
| ENSP00000347733 | ENSP00000348069 |
| ENSP00000347733 | ENSP00000348610 |
| ENSP00000347733 | ENSP00000348708 |
| ENSP00000347733 | ENSP00000349213 |
| ENSP00000347733 | ENSP00000350283 |
| ENSP00000347733 | ENSP00000351490 |
| ENSP00000347733 | ENSP00000353622 |
| ENSP00000347733 | ENSP00000354681 |
| ENSP00000347733 | ENSP00000356848 |
| ENSP00000347733 | ENSP00000357047 |
| ENSP00000347733 | ENSP00000357442 |
| ENSP00000347733 | ENSP00000358423 |
| ENSP00000347733 | ENSP00000358605 |
| ENSP00000347733 | ENSP00000358854 |
| ENSP00000347733 | ENSP00000358886 |
| ENSP00000347733 | ENSP00000359518 |
| ENSP00000347733 | ENSP00000360515 |
| ENSP00000347733 | ENSP00000360532 |
| ENSP00000347733 | ENSP00000361998 |
| ENSP00000347733 | ENSP00000362166 |
| ENSP00000347733 | ENSP00000362352 |
| ENSP00000347733 | ENSP00000362546 |
| ENSP00000347733 | ENSP00000363193 |
| ENSP00000347733 | ENSP00000363763 |
| ENSP00000347733 | ENSP00000364895 |
| ENSP00000347733 | ENSP00000364929 |
| ENSP00000347733 | ENSP00000366565 |
| ENSP00000347733 | ENSP00000366974 |
| ENSP00000347733 | ENSP00000368686 |
| ENSP00000347733 | ENSP00000369162 |
| ENSP00000347733 | ENSP00000369335 |
| ENSP00000347733 | ENSP00000369695 |
| ENSP00000347733 | ENSP00000369716 |
| ENSP00000347733 | ENSP00000374213 |
| ENSP00000347733 | ENSP00000377747 |
| ENSP00000347733 | ENSP00000392028 |
| ENSP00000347733 | ENSP00000397259 |

|                 |                 |
|-----------------|-----------------|
| ENSP00000347733 | ENSP00000417281 |
| ENSP00000347836 | ENSP00000350512 |
| ENSP00000347836 | ENSP00000355028 |
| ENSP00000347836 | ENSP00000359403 |
| ENSP00000347836 | ENSP00000360798 |
| ENSP00000347836 | ENSP00000363089 |
| ENSP00000347836 | ENSP00000363095 |
| ENSP00000347836 | ENSP00000364263 |
| ENSP00000347836 | ENSP00000364270 |
| ENSP00000347836 | ENSP00000364486 |
| ENSP00000347836 | ENSP00000364895 |
| ENSP00000347836 | ENSP00000366249 |
| ENSP00000347836 | ENSP00000368699 |
| ENSP00000347836 | ENSP00000369757 |
| ENSP00000347836 | ENSP00000370588 |
| ENSP00000347836 | ENSP00000373039 |
| ENSP00000347836 | ENSP00000374552 |
| ENSP00000347836 | ENSP00000379217 |
| ENSP00000347836 | ENSP00000380129 |
| ENSP00000347836 | ENSP00000396152 |
| ENSP00000347836 | ENSP00000417132 |
| ENSP00000347883 | ENSP00000356104 |
| ENSP00000347883 | ENSP00000368976 |
| ENSP00000347883 | ENSP00000383719 |
| ENSP00000347896 | ENSP00000356920 |
| ENSP00000347919 | ENSP00000348602 |
| ENSP00000347919 | ENSP00000353698 |
| ENSP00000347919 | ENSP00000361042 |
| ENSP00000347919 | ENSP00000403852 |
| ENSP00000347942 | ENSP00000349640 |
| ENSP00000347942 | ENSP00000349727 |
| ENSP00000347942 | ENSP00000363763 |
| ENSP00000347942 | ENSP00000368805 |
| ENSP00000347942 | ENSP00000372160 |
| ENSP00000347942 | ENSP00000380921 |
| ENSP00000347942 | ENSP00000381793 |
| ENSP00000347942 | ENSP00000384675 |
| ENSP00000347942 | ENSP00000393725 |
| ENSP00000347948 | ENSP00000353868 |
| ENSP00000347948 | ENSP00000356520 |
| ENSP00000347948 | ENSP00000356972 |
| ENSP00000347948 | ENSP00000356989 |
| ENSP00000347948 | ENSP00000359258 |
| ENSP00000347948 | ENSP00000369100 |
| ENSP00000347978 | ENSP00000348089 |
| ENSP00000347978 | ENSP00000349393 |



|                 |                 |
|-----------------|-----------------|
| ENSP00000347978 | ENSP00000351284 |
| ENSP00000347978 | ENSP00000351697 |
| ENSP00000347978 | ENSP00000352257 |
| ENSP00000347978 | ENSP00000354522 |
| ENSP00000347978 | ENSP00000354957 |
| ENSP00000347978 | ENSP00000355185 |
| ENSP00000347978 | ENSP00000358019 |
| ENSP00000347978 | ENSP00000358478 |
| ENSP00000347978 | ENSP00000358812 |
| ENSP00000347978 | ENSP00000360116 |
| ENSP00000347978 | ENSP00000360310 |
| ENSP00000347978 | ENSP00000361310 |
| ENSP00000347978 | ENSP00000364270 |
| ENSP00000347978 | ENSP00000367527 |
| ENSP00000347978 | ENSP00000367787 |
| ENSP00000347978 | ENSP00000368349 |
| ENSP00000347978 | ENSP00000368438 |
| ENSP00000347978 | ENSP00000369335 |
| ENSP00000347978 | ENSP00000369411 |
| ENSP00000347978 | ENSP00000370151 |
| ENSP00000347978 | ENSP00000370222 |
| ENSP00000347978 | ENSP00000371475 |
| ENSP00000347978 | ENSP00000375809 |
| ENSP00000347978 | ENSP00000378529 |
| ENSP00000347978 | ENSP00000381031 |
| ENSP00000347978 | ENSP00000384048 |
| ENSP00000347978 | ENSP00000400806 |
| ENSP00000347978 | ENSP00000402515 |
| ENSP00000347978 | ENSP00000402527 |
| ENSP00000347978 | ENSP00000406490 |
| ENSP00000347979 | ENSP00000351908 |
| ENSP00000347979 | ENSP00000353059 |
| ENSP00000347979 | ENSP00000355361 |
| ENSP00000347979 | ENSP00000356694 |
| ENSP00000347979 | ENSP00000360025 |
| ENSP00000347979 | ENSP00000379457 |
| ENSP00000347979 | ENSP00000381031 |
| ENSP00000347979 | ENSP00000394794 |
| ENSP00000347979 | ENSP00000396876 |
| ENSP00000347988 | ENSP00000352408 |
| ENSP00000347997 | ENSP00000362334 |
| ENSP00000347997 | ENSP00000364270 |
| ENSP00000347997 | ENSP00000366682 |
| ENSP00000347997 | ENSP00000370737 |
| ENSP00000347997 | ENSP00000376758 |
| ENSP00000347997 | ENSP00000396937 |

|                 |                 |
|-----------------|-----------------|
| ENSP00000347997 | ENSP00000418734 |
| ENSP00000348010 | ENSP00000348107 |
| ENSP00000348010 | ENSP00000352514 |
| ENSP00000348010 | ENSP00000355185 |
| ENSP00000348010 | ENSP00000357051 |
| ENSP00000348010 | ENSP00000358576 |
| ENSP00000348010 | ENSP00000359531 |
| ENSP00000348010 | ENSP00000361577 |
| ENSP00000348010 | ENSP00000362110 |
| ENSP00000348010 | ENSP00000362900 |
| ENSP00000348010 | ENSP00000362936 |
| ENSP00000348010 | ENSP00000363313 |
| ENSP00000348010 | ENSP00000364289 |
| ENSP00000348010 | ENSP00000366135 |
| ENSP00000348010 | ENSP00000366607 |
| ENSP00000348010 | ENSP00000367059 |
| ENSP00000348010 | ENSP00000367527 |
| ENSP00000348010 | ENSP00000376309 |
| ENSP00000348010 | ENSP00000376973 |
| ENSP00000348010 | ENSP00000398208 |
| ENSP00000348010 | ENSP00000412566 |
| ENSP00000348010 | ENSP00000420195 |
| ENSP00000348020 | ENSP00000351284 |
| ENSP00000348020 | ENSP00000351697 |
| ENSP00000348020 | ENSP00000354497 |
| ENSP00000348020 | ENSP00000361310 |
| ENSP00000348020 | ENSP00000364270 |
| ENSP00000348020 | ENSP00000368349 |
| ENSP00000348020 | ENSP00000368438 |
| ENSP00000348020 | ENSP00000369335 |
| ENSP00000348020 | ENSP00000406490 |
| ENSP00000348069 | ENSP00000348610 |
| ENSP00000348069 | ENSP00000353622 |
| ENSP00000348069 | ENSP00000353698 |
| ENSP00000348069 | ENSP00000354972 |
| ENSP00000348069 | ENSP00000355601 |
| ENSP00000348069 | ENSP00000357047 |
| ENSP00000348069 | ENSP00000357283 |
| ENSP00000348069 | ENSP00000363193 |
| ENSP00000348069 | ENSP00000368253 |
| ENSP00000348069 | ENSP00000379457 |
| ENSP00000348081 | ENSP00000358335 |
| ENSP00000348081 | ENSP00000360116 |
| ENSP00000348081 | ENSP00000361202 |
| ENSP00000348081 | ENSP00000363694 |
| ENSP00000348081 | ENSP00000365016 |

|                 |                 |
|-----------------|-----------------|
| ENSP00000348081 | ENSP00000378368 |
| ENSP00000348081 | ENSP00000382064 |
| ENSP00000348081 | ENSP00000383431 |
| ENSP00000348089 | ENSP00000348168 |
| ENSP00000348089 | ENSP00000351137 |
| ENSP00000348089 | ENSP00000351284 |
| ENSP00000348089 | ENSP00000355759 |
| ENSP00000348089 | ENSP00000356405 |
| ENSP00000348089 | ENSP00000358478 |
| ENSP00000348089 | ENSP00000360621 |
| ENSP00000348089 | ENSP00000361310 |
| ENSP00000348089 | ENSP00000361465 |
| ENSP00000348089 | ENSP00000364126 |
| ENSP00000348089 | ENSP00000364270 |
| ENSP00000348089 | ENSP00000366135 |
| ENSP00000348089 | ENSP00000366271 |
| ENSP00000348089 | ENSP00000366974 |
| ENSP00000348089 | ENSP00000368438 |
| ENSP00000348089 | ENSP00000369335 |
| ENSP00000348089 | ENSP00000370125 |
| ENSP00000348089 | ENSP00000370150 |
| ENSP00000348089 | ENSP00000372023 |
| ENSP00000348089 | ENSP00000374280 |
| ENSP00000348089 | ENSP00000375809 |
| ENSP00000348089 | ENSP00000395574 |
| ENSP00000348089 | ENSP00000402515 |
| ENSP00000348089 | ENSP00000403852 |
| ENSP00000348089 | ENSP00000418111 |
| ENSP00000348107 | ENSP00000348551 |
| ENSP00000348107 | ENSP00000351596 |
| ENSP00000348107 | ENSP00000352678 |
| ENSP00000348107 | ENSP00000352738 |
| ENSP00000348107 | ENSP00000354522 |
| ENSP00000348107 | ENSP00000355599 |
| ENSP00000348107 | ENSP00000355941 |
| ENSP00000348107 | ENSP00000356548 |
| ENSP00000348107 | ENSP00000356811 |
| ENSP00000348107 | ENSP00000356989 |
| ENSP00000348107 | ENSP00000358812 |
| ENSP00000348107 | ENSP00000359518 |
| ENSP00000348107 | ENSP00000359939 |
| ENSP00000348107 | ENSP00000360473 |
| ENSP00000348107 | ENSP00000361433 |
| ENSP00000348107 | ENSP00000364293 |
| ENSP00000348107 | ENSP00000366030 |
| ENSP00000348107 | ENSP00000366135 |

|                 |                 |
|-----------------|-----------------|
| ENSP00000348107 | ENSP00000368984 |
| ENSP00000348107 | ENSP00000370589 |
| ENSP00000348107 | ENSP00000379888 |
| ENSP00000348107 | ENSP00000380460 |
| ENSP00000348107 | ENSP00000380982 |
| ENSP00000348107 | ENSP00000386134 |
| ENSP00000348107 | ENSP00000398597 |
| ENSP00000348107 | ENSP00000402240 |
| ENSP00000348107 | ENSP00000417748 |
| ENSP00000348128 | ENSP00000348215 |
| ENSP00000348128 | ENSP00000353452 |
| ENSP00000348128 | ENSP00000355922 |
| ENSP00000348128 | ENSP00000356319 |
| ENSP00000348128 | ENSP00000357283 |
| ENSP00000348128 | ENSP00000359225 |
| ENSP00000348128 | ENSP00000361824 |
| ENSP00000348128 | ENSP00000362441 |
| ENSP00000348128 | ENSP00000364180 |
| ENSP00000348128 | ENSP00000367196 |
| ENSP00000348128 | ENSP00000368976 |
| ENSP00000348128 | ENSP00000377492 |
| ENSP00000348128 | ENSP00000378368 |
| ENSP00000348128 | ENSP00000382562 |
| ENSP00000348128 | ENSP00000386259 |
| ENSP00000348128 | ENSP00000416097 |
| ENSP00000348129 | ENSP00000357907 |
| ENSP00000348129 | ENSP00000360473 |
| ENSP00000348129 | ENSP00000386759 |
| ENSP00000348129 | ENSP00000396937 |
| ENSP00000348157 | ENSP00000356652 |
| ENSP00000348163 | ENSP00000348602 |
| ENSP00000348163 | ENSP00000361824 |
| ENSP00000348163 | ENSP00000365891 |
| ENSP00000348163 | ENSP00000366843 |
| ENSP00000348163 | ENSP00000368438 |
| ENSP00000348163 | ENSP00000369335 |
| ENSP00000348163 | ENSP00000371155 |
| ENSP00000348163 | ENSP00000391944 |
| ENSP00000348163 | ENSP00000392330 |
| ENSP00000348163 | ENSP00000402084 |
| ENSP00000348168 | ENSP00000353332 |
| ENSP00000348168 | ENSP00000356448 |
| ENSP00000348168 | ENSP00000359531 |
| ENSP00000348168 | ENSP00000361465 |
| ENSP00000348168 | ENSP00000362717 |
| ENSP00000348168 | ENSP00000364270 |

|                 |                 |
|-----------------|-----------------|
| ENSP00000348168 | ENSP00000365504 |
| ENSP00000348168 | ENSP00000366915 |
| ENSP00000348168 | ENSP00000370105 |
| ENSP00000348168 | ENSP00000370150 |
| ENSP00000348168 | ENSP00000375809 |
| ENSP00000348168 | ENSP00000377969 |
| ENSP00000348168 | ENSP00000381654 |
| ENSP00000348168 | ENSP00000386227 |
| ENSP00000348168 | ENSP00000395497 |
| ENSP00000348168 | ENSP00000396251 |
| ENSP00000348168 | ENSP00000401105 |
| ENSP00000348168 | ENSP00000403156 |
| ENSP00000348168 | ENSP00000417281 |
| ENSP00000348215 | ENSP00000348349 |
| ENSP00000348215 | ENSP00000348602 |
| ENSP00000348215 | ENSP00000352802 |
| ENSP00000348215 | ENSP00000353564 |
| ENSP00000348215 | ENSP00000354927 |
| ENSP00000348215 | ENSP00000356694 |
| ENSP00000348215 | ENSP00000361009 |
| ENSP00000348215 | ENSP00000365005 |
| ENSP00000348215 | ENSP00000365891 |
| ENSP00000348215 | ENSP00000366121 |
| ENSP00000348215 | ENSP00000366225 |
| ENSP00000348215 | ENSP00000368824 |
| ENSP00000348215 | ENSP00000369810 |
| ENSP00000348215 | ENSP00000370719 |
| ENSP00000348215 | ENSP00000375881 |
| ENSP00000348215 | ENSP00000376410 |
| ENSP00000348215 | ENSP00000381293 |
| ENSP00000348215 | ENSP00000382423 |
| ENSP00000348215 | ENSP00000384675 |
| ENSP00000348215 | ENSP00000386878 |
| ENSP00000348215 | ENSP00000389934 |
| ENSP00000348215 | ENSP00000397351 |
| ENSP00000348215 | ENSP00000402084 |
| ENSP00000348234 | ENSP00000365534 |
| ENSP00000348234 | ENSP00000399968 |
| ENSP00000348273 | ENSP00000348278 |
| ENSP00000348273 | ENSP00000358997 |
| ENSP00000348273 | ENSP00000361014 |
| ENSP00000348273 | ENSP00000363976 |
| ENSP00000348273 | ENSP00000400806 |
| ENSP00000348278 | ENSP00000357494 |
| ENSP00000348307 | ENSP00000349022 |
| ENSP00000348307 | ENSP00000355361 |

|                 |                 |
|-----------------|-----------------|
| ENSP00000348307 | ENSP00000356991 |
| ENSP00000348307 | ENSP00000358595 |
| ENSP00000348307 | ENSP00000368190 |
| ENSP00000348307 | ENSP00000382178 |
| ENSP00000348307 | ENSP00000383431 |
| ENSP00000348349 | ENSP00000358994 |
| ENSP00000348349 | ENSP00000361009 |
| ENSP00000348349 | ENSP00000366121 |
| ENSP00000348349 | ENSP00000376410 |
| ENSP00000348349 | ENSP00000397351 |
| ENSP00000348349 | ENSP00000397598 |
| ENSP00000348349 | ENSP00000407487 |
| ENSP00000348380 | ENSP00000348762 |
| ENSP00000348394 | ENSP00000350249 |
| ENSP00000348394 | ENSP00000374443 |
| ENSP00000348394 | ENSP00000377496 |
| ENSP00000348395 | ENSP00000379933 |
| ENSP00000348442 | ENSP00000349970 |
| ENSP00000348442 | ENSP00000350512 |
| ENSP00000348442 | ENSP00000350708 |
| ENSP00000348442 | ENSP00000351284 |
| ENSP00000348442 | ENSP00000351947 |
| ENSP00000348442 | ENSP00000353622 |
| ENSP00000348442 | ENSP00000355560 |
| ENSP00000348442 | ENSP00000356807 |
| ENSP00000348442 | ENSP00000357980 |
| ENSP00000348442 | ENSP00000360216 |
| ENSP00000348442 | ENSP00000360532 |
| ENSP00000348442 | ENSP00000361186 |
| ENSP00000348442 | ENSP00000362334 |
| ENSP00000348442 | ENSP00000362993 |
| ENSP00000348442 | ENSP00000370222 |
| ENSP00000348442 | ENSP00000381045 |
| ENSP00000348442 | ENSP00000381293 |
| ENSP00000348442 | ENSP00000381891 |
| ENSP00000348442 | ENSP00000384211 |
| ENSP00000348442 | ENSP00000386212 |
| ENSP00000348442 | ENSP00000396937 |
| ENSP00000348442 | ENSP00000400591 |
| ENSP00000348442 | ENSP00000401508 |
| ENSP00000348442 | ENSP00000410758 |
| ENSP00000348455 | ENSP00000349205 |
| ENSP00000348455 | ENSP00000354125 |
| ENSP00000348455 | ENSP00000355231 |
| ENSP00000348455 | ENSP00000366237 |
| ENSP00000348455 | ENSP00000367265 |

|                 |                 |
|-----------------|-----------------|
| ENSP00000348455 | ENSP00000367721 |
| ENSP00000348455 | ENSP00000369810 |
| ENSP00000348455 | ENSP00000369871 |
| ENSP00000348455 | ENSP00000374558 |
| ENSP00000348455 | ENSP00000382269 |
| ENSP00000348455 | ENSP00000396704 |
| ENSP00000348459 | ENSP00000362282 |
| ENSP00000348472 | ENSP00000360992 |
| ENSP00000348510 | ENSP00000351947 |
| ENSP00000348510 | ENSP00000354522 |
| ENSP00000348510 | ENSP00000361219 |
| ENSP00000348510 | ENSP00000368797 |
| ENSP00000348510 | ENSP00000374455 |
| ENSP00000348510 | ENSP00000379607 |
| ENSP00000348538 | ENSP00000354951 |
| ENSP00000348550 | ENSP00000356311 |
| ENSP00000348550 | ENSP00000378180 |
| ENSP00000348551 | ENSP00000351407 |
| ENSP00000348551 | ENSP00000351894 |
| ENSP00000348551 | ENSP00000353622 |
| ENSP00000348551 | ENSP00000357887 |
| ENSP00000348551 | ENSP00000358716 |
| ENSP00000348551 | ENSP00000360515 |
| ENSP00000348551 | ENSP00000364912 |
| ENSP00000348551 | ENSP00000366607 |
| ENSP00000348551 | ENSP00000368686 |
| ENSP00000348551 | ENSP00000380460 |
| ENSP00000348551 | ENSP00000384490 |
| ENSP00000348551 | ENSP00000386759 |
| ENSP00000348551 | ENSP00000387426 |
| ENSP00000348551 | ENSP00000399511 |
| ENSP00000348554 | ENSP00000350708 |
| ENSP00000348554 | ENSP00000351697 |
| ENSP00000348554 | ENSP00000351947 |
| ENSP00000348554 | ENSP00000353246 |
| ENSP00000348554 | ENSP00000355941 |
| ENSP00000348554 | ENSP00000358854 |
| ENSP00000348554 | ENSP00000360532 |
| ENSP00000348554 | ENSP00000363322 |
| ENSP00000348554 | ENSP00000364986 |
| ENSP00000348554 | ENSP00000367878 |
| ENSP00000348554 | ENSP00000368730 |
| ENSP00000348554 | ENSP00000372689 |
| ENSP00000348554 | ENSP00000373060 |
| ENSP00000348554 | ENSP00000377655 |
| ENSP00000348554 | ENSP00000378350 |

|                 |                 |
|-----------------|-----------------|
| ENSP00000348554 | ENSP00000378529 |
| ENSP00000348554 | ENSP00000380921 |
| ENSP00000348554 | ENSP00000394394 |
| ENSP00000348554 | ENSP00000402527 |
| ENSP00000348564 | ENSP00000360025 |
| ENSP00000348564 | ENSP00000368438 |
| ENSP00000348565 | ENSP00000356982 |
| ENSP00000348565 | ENSP00000358140 |
| ENSP00000348565 | ENSP00000359939 |
| ENSP00000348565 | ENSP00000360532 |
| ENSP00000348565 | ENSP00000361640 |
| ENSP00000348565 | ENSP00000362413 |
| ENSP00000348565 | ENSP00000363779 |
| ENSP00000348573 | ENSP00000352572 |
| ENSP00000348573 | ENSP00000352673 |
| ENSP00000348573 | ENSP00000355596 |
| ENSP00000348573 | ENSP00000355599 |
| ENSP00000348573 | ENSP00000360310 |
| ENSP00000348573 | ENSP00000360532 |
| ENSP00000348573 | ENSP00000360540 |
| ENSP00000348573 | ENSP00000367440 |
| ENSP00000348573 | ENSP00000368976 |
| ENSP00000348573 | ENSP00000381657 |
| ENSP00000348573 | ENSP00000382562 |
| ENSP00000348573 | ENSP00000399511 |
| ENSP00000348573 | ENSP00000402084 |
| ENSP00000348573 | ENSP00000406490 |
| ENSP00000348573 | ENSP00000413625 |
| ENSP00000348573 | ENSP00000414187 |
| ENSP00000348573 | ENSP00000416097 |
| ENSP00000348577 | ENSP00000350767 |
| ENSP00000348577 | ENSP00000351908 |
| ENSP00000348577 | ENSP00000351947 |
| ENSP00000348577 | ENSP00000352219 |
| ENSP00000348577 | ENSP00000352400 |
| ENSP00000348577 | ENSP00000352408 |
| ENSP00000348577 | ENSP00000353735 |
| ENSP00000348577 | ENSP00000356744 |
| ENSP00000348577 | ENSP00000357965 |
| ENSP00000348577 | ENSP00000359976 |
| ENSP00000348577 | ENSP00000360532 |
| ENSP00000348577 | ENSP00000360621 |
| ENSP00000348577 | ENSP00000361245 |
| ENSP00000348577 | ENSP00000362592 |
| ENSP00000348577 | ENSP00000362751 |
| ENSP00000348577 | ENSP00000364582 |



|                 |                 |
|-----------------|-----------------|
| ENSP00000348577 | ENSP00000365877 |
| ENSP00000348577 | ENSP00000366974 |
| ENSP00000348577 | ENSP00000367034 |
| ENSP00000348577 | ENSP00000367766 |
| ENSP00000348577 | ENSP00000369862 |
| ENSP00000348577 | ENSP00000371051 |
| ENSP00000348577 | ENSP00000378624 |
| ENSP00000348577 | ENSP00000386520 |
| ENSP00000348577 | ENSP00000390158 |
| ENSP00000348577 | ENSP00000394791 |
| ENSP00000348577 | ENSP00000406490 |
| ENSP00000348577 | ENSP00000412922 |
| ENSP00000348596 | ENSP00000352021 |
| ENSP00000348596 | ENSP00000354040 |
| ENSP00000348596 | ENSP00000358400 |
| ENSP00000348596 | ENSP00000359345 |
| ENSP00000348596 | ENSP00000362153 |
| ENSP00000348596 | ENSP00000362171 |
| ENSP00000348596 | ENSP00000363384 |
| ENSP00000348596 | ENSP00000363559 |
| ENSP00000348596 | ENSP00000364037 |
| ENSP00000348596 | ENSP00000364320 |
| ENSP00000348596 | ENSP00000365806 |
| ENSP00000348596 | ENSP00000368612 |
| ENSP00000348596 | ENSP00000373090 |
| ENSP00000348596 | ENSP00000377640 |
| ENSP00000348596 | ENSP00000379888 |
| ENSP00000348596 | ENSP00000394290 |
| ENSP00000348596 | ENSP00000402338 |
| ENSP00000348596 | ENSP00000403576 |
| ENSP00000348596 | ENSP00000409074 |
| ENSP00000348596 | ENSP00000409367 |
| ENSP00000348596 | ENSP00000411162 |
| ENSP00000348602 | ENSP00000349205 |
| ENSP00000348602 | ENSP00000349824 |
| ENSP00000348602 | ENSP00000349877 |
| ENSP00000348602 | ENSP00000350199 |
| ENSP00000348602 | ENSP00000352802 |
| ENSP00000348602 | ENSP00000353622 |
| ENSP00000348602 | ENSP00000356989 |
| ENSP00000348602 | ENSP00000358812 |
| ENSP00000348602 | ENSP00000358831 |
| ENSP00000348602 | ENSP00000360076 |
| ENSP00000348602 | ENSP00000360798 |
| ENSP00000348602 | ENSP00000362399 |
| ENSP00000348602 | ENSP00000365891 |

|                 |                 |
|-----------------|-----------------|
| ENSP00000348602 | ENSP00000366746 |
| ENSP00000348602 | ENSP00000370719 |
| ENSP00000348602 | ENSP00000371341 |
| ENSP00000348602 | ENSP00000373347 |
| ENSP00000348602 | ENSP00000380460 |
| ENSP00000348602 | ENSP00000386878 |
| ENSP00000348602 | ENSP00000397598 |
| ENSP00000348602 | ENSP00000413625 |
| ENSP00000348602 | ENSP00000419599 |
| ENSP00000348610 | ENSP00000350283 |
| ENSP00000348610 | ENSP00000354951 |
| ENSP00000348610 | ENSP00000355759 |
| ENSP00000348610 | ENSP00000357907 |
| ENSP00000348610 | ENSP00000362948 |
| ENSP00000348610 | ENSP00000363193 |
| ENSP00000348610 | ENSP00000391774 |
| ENSP00000348610 | ENSP00000392617 |
| ENSP00000348632 | ENSP00000358335 |
| ENSP00000348632 | ENSP00000360116 |
| ENSP00000348632 | ENSP00000381698 |
| ENSP00000348657 | ENSP00000360532 |
| ENSP00000348657 | ENSP00000410088 |
| ENSP00000348685 | ENSP00000354119 |
| ENSP00000348685 | ENSP00000357013 |
| ENSP00000348685 | ENSP00000360916 |
| ENSP00000348685 | ENSP00000364898 |
| ENSP00000348685 | ENSP00000380921 |
| ENSP00000348708 | ENSP00000353741 |
| ENSP00000348708 | ENSP00000354125 |
| ENSP00000348708 | ENSP00000355261 |
| ENSP00000348708 | ENSP00000356548 |
| ENSP00000348708 | ENSP00000356811 |
| ENSP00000348708 | ENSP00000359345 |
| ENSP00000348708 | ENSP00000359939 |
| ENSP00000348708 | ENSP00000360532 |
| ENSP00000348708 | ENSP00000361433 |
| ENSP00000348708 | ENSP00000361557 |
| ENSP00000348708 | ENSP00000362135 |
| ENSP00000348708 | ENSP00000363397 |
| ENSP00000348708 | ENSP00000366135 |
| ENSP00000348708 | ENSP00000372093 |
| ENSP00000348708 | ENSP00000373715 |
| ENSP00000348708 | ENSP00000380453 |
| ENSP00000348708 | ENSP00000386992 |
| ENSP00000348708 | ENSP00000387911 |
| ENSP00000348708 | ENSP00000391432 |

|                 |                 |
|-----------------|-----------------|
| ENSP00000348708 | ENSP00000392617 |
| ENSP00000348708 | ENSP00000398597 |
| ENSP00000348708 | ENSP00000402515 |
| ENSP00000348708 | ENSP00000417229 |
| ENSP00000348714 | ENSP00000359837 |
| ENSP00000348714 | ENSP00000360286 |
| ENSP00000348714 | ENSP00000366135 |
| ENSP00000348714 | ENSP00000366179 |
| ENSP00000348714 | ENSP00000368565 |
| ENSP00000348714 | ENSP00000387170 |
| ENSP00000348722 | ENSP00000358563 |
| ENSP00000348722 | ENSP00000360412 |
| ENSP00000348722 | ENSP00000366135 |
| ENSP00000348722 | ENSP00000370741 |
| ENSP00000348722 | ENSP00000379888 |
| ENSP00000348722 | ENSP00000380982 |
| ENSP00000348722 | ENSP00000386227 |
| ENSP00000348762 | ENSP00000353104 |
| ENSP00000348762 | ENSP00000357480 |
| ENSP00000348762 | ENSP00000357650 |
| ENSP00000348762 | ENSP00000360918 |
| ENSP00000348762 | ENSP00000369843 |
| ENSP00000348762 | ENSP00000383901 |
| ENSP00000348762 | ENSP00000387019 |
| ENSP00000348784 | ENSP00000351885 |
| ENSP00000348784 | ENSP00000354558 |
| ENSP00000348784 | ENSP00000356807 |
| ENSP00000348784 | ENSP00000367841 |
| ENSP00000348784 | ENSP00000371888 |
| ENSP00000348784 | ENSP00000378306 |
| ENSP00000348784 | ENSP00000381198 |
| ENSP00000348784 | ENSP00000383402 |
| ENSP00000348784 | ENSP00000386722 |
| ENSP00000348784 | ENSP00000394085 |
| ENSP00000348784 | ENSP00000402515 |
| ENSP00000348799 | ENSP00000357965 |
| ENSP00000348813 | ENSP00000355231 |
| ENSP00000348848 | ENSP00000353010 |
| ENSP00000348848 | ENSP00000364486 |
| ENSP00000348877 | ENSP00000354742 |
| ENSP00000348877 | ENSP00000355884 |
| ENSP00000348877 | ENSP00000358081 |
| ENSP00000348877 | ENSP00000360286 |
| ENSP00000348877 | ENSP00000362399 |
| ENSP00000348877 | ENSP00000370517 |
| ENSP00000348877 | ENSP00000373082 |

|                 |                 |
|-----------------|-----------------|
| ENSP00000348877 | ENSP00000377148 |
| ENSP00000348877 | ENSP00000379228 |
| ENSP00000348877 | ENSP00000381031 |
| ENSP00000348877 | ENSP00000389065 |
| ENSP00000348877 | ENSP00000390783 |
| ENSP00000348877 | ENSP00000411327 |
| ENSP00000348877 | ENSP00000412553 |
| ENSP00000348877 | ENSP00000413319 |
| ENSP00000348877 | ENSP00000414373 |
| ENSP00000348886 | ENSP00000349016 |
| ENSP00000348886 | ENSP00000350512 |
| ENSP00000348886 | ENSP00000352219 |
| ENSP00000348886 | ENSP00000353826 |
| ENSP00000348886 | ENSP00000354876 |
| ENSP00000348886 | ENSP00000361686 |
| ENSP00000348886 | ENSP00000364188 |
| ENSP00000348886 | ENSP00000368438 |
| ENSP00000348888 | ENSP00000370557 |
| ENSP00000348915 | ENSP00000359258 |
| ENSP00000348965 | ENSP00000349016 |
| ENSP00000348965 | ENSP00000349679 |
| ENSP00000348965 | ENSP00000351665 |
| ENSP00000348965 | ENSP00000354158 |
| ENSP00000348965 | ENSP00000354525 |
| ENSP00000348965 | ENSP00000354791 |
| ENSP00000348965 | ENSP00000355596 |
| ENSP00000348965 | ENSP00000355922 |
| ENSP00000348965 | ENSP00000356548 |
| ENSP00000348965 | ENSP00000357643 |
| ENSP00000348965 | ENSP00000358810 |
| ENSP00000348965 | ENSP00000359976 |
| ENSP00000348965 | ENSP00000360310 |
| ENSP00000348965 | ENSP00000360532 |
| ENSP00000348965 | ENSP00000363779 |
| ENSP00000348965 | ENSP00000364847 |
| ENSP00000348965 | ENSP00000366974 |
| ENSP00000348965 | ENSP00000367841 |
| ENSP00000348965 | ENSP00000368976 |
| ENSP00000348965 | ENSP00000370023 |
| ENSP00000348965 | ENSP00000374566 |
| ENSP00000348965 | ENSP00000377747 |
| ENSP00000348965 | ENSP00000377793 |
| ENSP00000348965 | ENSP00000378160 |
| ENSP00000348965 | ENSP00000379607 |
| ENSP00000348965 | ENSP00000382177 |
| ENSP00000348965 | ENSP00000384675 |

|                 |                 |
|-----------------|-----------------|
| ENSP00000348965 | ENSP00000388330 |
| ENSP00000348965 | ENSP00000399511 |
| ENSP00000348965 | ENSP00000412566 |
| ENSP00000348986 | ENSP00000357484 |
| ENSP00000349016 | ENSP00000349543 |
| ENSP00000349016 | ENSP00000352706 |
| ENSP00000349016 | ENSP00000354791 |
| ENSP00000349016 | ENSP00000355607 |
| ENSP00000349016 | ENSP00000356329 |
| ENSP00000349016 | ENSP00000356563 |
| ENSP00000349016 | ENSP00000356587 |
| ENSP00000349016 | ENSP00000357051 |
| ENSP00000349016 | ENSP00000358312 |
| ENSP00000349016 | ENSP00000360569 |
| ENSP00000349016 | ENSP00000364883 |
| ENSP00000349016 | ENSP00000366249 |
| ENSP00000349016 | ENSP00000368699 |
| ENSP00000349016 | ENSP00000370023 |
| ENSP00000349016 | ENSP00000373039 |
| ENSP00000349016 | ENSP00000377470 |
| ENSP00000349016 | ENSP00000380718 |
| ENSP00000349016 | ENSP00000394869 |
| ENSP00000349016 | ENSP00000396152 |
| ENSP00000349016 | ENSP00000407401 |
| ENSP00000349016 | ENSP00000410416 |
| ENSP00000349022 | ENSP00000355155 |
| ENSP00000349022 | ENSP00000360286 |
| ENSP00000349022 | ENSP00000373509 |
| ENSP00000349022 | ENSP00000386394 |
| ENSP00000349022 | ENSP00000390948 |
| ENSP00000349049 | ENSP00000351947 |
| ENSP00000349049 | ENSP00000352516 |
| ENSP00000349049 | ENSP00000353622 |
| ENSP00000349049 | ENSP00000357965 |
| ENSP00000349049 | ENSP00000358092 |
| ENSP00000349049 | ENSP00000359321 |
| ENSP00000349049 | ENSP00000360215 |
| ENSP00000349049 | ENSP00000360532 |
| ENSP00000349049 | ENSP00000362592 |
| ENSP00000349049 | ENSP00000362936 |
| ENSP00000349049 | ENSP00000363787 |
| ENSP00000349049 | ENSP00000364839 |
| ENSP00000349049 | ENSP00000365877 |
| ENSP00000349049 | ENSP00000366156 |
| ENSP00000349049 | ENSP00000366271 |
| ENSP00000349049 | ENSP00000369270 |

|                 |                 |
|-----------------|-----------------|
| ENSP00000349049 | ENSP00000369716 |
| ENSP00000349049 | ENSP00000372699 |
| ENSP00000349049 | ENSP00000385746 |
| ENSP00000349049 | ENSP00000386759 |
| ENSP00000349049 | ENSP00000394757 |
| ENSP00000349049 | ENSP00000396271 |
| ENSP00000349049 | ENSP00000396439 |
| ENSP00000349049 | ENSP00000398824 |
| ENSP00000349049 | ENSP00000400572 |
| ENSP00000349049 | ENSP00000412190 |
| ENSP00000349078 | ENSP00000355739 |
| ENSP00000349078 | ENSP00000360286 |
| ENSP00000349124 | ENSP00000356807 |
| ENSP00000349124 | ENSP00000358716 |
| ENSP00000349131 | ENSP00000350854 |
| ENSP00000349131 | ENSP00000351346 |
| ENSP00000349131 | ENSP00000377280 |
| ENSP00000349142 | ENSP00000352219 |
| ENSP00000349142 | ENSP00000353701 |
| ENSP00000349142 | ENSP00000354632 |
| ENSP00000349142 | ENSP00000354876 |
| ENSP00000349142 | ENSP00000358737 |
| ENSP00000349142 | ENSP00000361686 |
| ENSP00000349142 | ENSP00000362306 |
| ENSP00000349142 | ENSP00000362592 |
| ENSP00000349142 | ENSP00000363533 |
| ENSP00000349142 | ENSP00000364543 |
| ENSP00000349142 | ENSP00000365534 |
| ENSP00000349142 | ENSP00000367923 |
| ENSP00000349142 | ENSP00000370414 |
| ENSP00000349142 | ENSP00000372827 |
| ENSP00000349142 | ENSP00000379500 |
| ENSP00000349142 | ENSP00000387262 |
| ENSP00000349142 | ENSP00000389649 |
| ENSP00000349142 | ENSP00000394400 |
| ENSP00000349142 | ENSP00000399530 |
| ENSP00000349142 | ENSP00000400626 |
| ENSP00000349142 | ENSP00000412310 |
| ENSP00000349147 | ENSP00000379933 |
| ENSP00000349205 | ENSP00000349785 |
| ENSP00000349205 | ENSP00000354558 |
| ENSP00000349205 | ENSP00000355231 |
| ENSP00000349205 | ENSP00000367265 |
| ENSP00000349205 | ENSP00000373702 |
| ENSP00000349205 | ENSP00000402240 |
| ENSP00000349208 | ENSP00000354720 |

|                 |                 |
|-----------------|-----------------|
| ENSP00000349208 | ENSP00000356520 |
| ENSP00000349208 | ENSP00000356846 |
| ENSP00000349208 | ENSP00000361824 |
| ENSP00000349208 | ENSP00000387303 |
| ENSP00000349208 | ENSP00000396937 |
| ENSP00000349213 | ENSP00000351250 |
| ENSP00000349213 | ENSP00000351284 |
| ENSP00000349213 | ENSP00000351575 |
| ENSP00000349213 | ENSP00000351947 |
| ENSP00000349213 | ENSP00000353458 |
| ENSP00000349213 | ENSP00000353622 |
| ENSP00000349213 | ENSP00000354916 |
| ENSP00000349213 | ENSP00000355205 |
| ENSP00000349213 | ENSP00000357887 |
| ENSP00000349213 | ENSP00000358854 |
| ENSP00000349213 | ENSP00000359290 |
| ENSP00000349213 | ENSP00000360515 |
| ENSP00000349213 | ENSP00000360621 |
| ENSP00000349213 | ENSP00000362068 |
| ENSP00000349213 | ENSP00000364289 |
| ENSP00000349213 | ENSP00000366974 |
| ENSP00000349213 | ENSP00000369716 |
| ENSP00000349213 | ENSP00000372689 |
| ENSP00000349213 | ENSP00000374213 |
| ENSP00000349213 | ENSP00000377747 |
| ENSP00000349213 | ENSP00000378394 |
| ENSP00000349213 | ENSP00000379065 |
| ENSP00000349213 | ENSP00000379607 |
| ENSP00000349213 | ENSP00000380129 |
| ENSP00000349213 | ENSP00000384434 |
| ENSP00000349213 | ENSP00000386456 |
| ENSP00000349213 | ENSP00000386759 |
| ENSP00000349213 | ENSP00000392028 |
| ENSP00000349213 | ENSP00000397644 |
| ENSP00000349238 | ENSP00000360141 |
| ENSP00000349238 | ENSP00000377793 |
| ENSP00000349296 | ENSP00000353622 |
| ENSP00000349298 | ENSP00000353059 |
| ENSP00000349298 | ENSP00000369519 |
| ENSP00000349313 | ENSP00000349393 |
| ENSP00000349325 | ENSP00000359000 |
| ENSP00000349325 | ENSP00000359067 |
| ENSP00000349325 | ENSP00000372857 |
| ENSP00000349325 | ENSP00000377954 |
| ENSP00000349393 | ENSP00000350249 |
| ENSP00000349393 | ENSP00000351284 |

|                 |                 |
|-----------------|-----------------|
| ENSP00000349393 | ENSP00000351697 |
| ENSP00000349393 | ENSP00000352257 |
| ENSP00000349393 | ENSP00000355759 |
| ENSP00000349393 | ENSP00000360216 |
| ENSP00000349393 | ENSP00000364929 |
| ENSP00000349393 | ENSP00000366519 |
| ENSP00000349393 | ENSP00000368349 |
| ENSP00000349393 | ENSP00000368438 |
| ENSP00000349393 | ENSP00000369411 |
| ENSP00000349393 | ENSP00000370151 |
| ENSP00000349393 | ENSP00000371419 |
| ENSP00000349393 | ENSP00000382392 |
| ENSP00000349393 | ENSP00000388330 |
| ENSP00000349437 | ENSP00000358715 |
| ENSP00000349437 | ENSP00000363349 |
| ENSP00000349437 | ENSP00000366603 |
| ENSP00000349437 | ENSP00000377148 |
| ENSP00000349465 | ENSP00000350928 |
| ENSP00000349465 | ENSP00000355865 |
| ENSP00000349465 | ENSP00000356991 |
| ENSP00000349465 | ENSP00000363763 |
| ENSP00000349465 | ENSP00000366482 |
| ENSP00000349465 | ENSP00000371729 |
| ENSP00000349465 | ENSP00000379908 |
| ENSP00000349465 | ENSP00000381098 |
| ENSP00000349465 | ENSP00000383623 |
| ENSP00000349465 | ENSP00000397259 |
| ENSP00000349465 | ENSP00000400806 |
| ENSP00000349486 | ENSP00000360532 |
| ENSP00000349486 | ENSP00000363921 |
| ENSP00000349486 | ENSP00000364893 |
| ENSP00000349486 | ENSP00000366135 |
| ENSP00000349486 | ENSP00000366977 |
| ENSP00000349486 | ENSP00000367197 |
| ENSP00000349486 | ENSP00000369400 |
| ENSP00000349486 | ENSP00000370410 |
| ENSP00000349486 | ENSP00000378338 |
| ENSP00000349486 | ENSP00000380523 |
| ENSP00000349486 | ENSP00000381045 |
| ENSP00000349486 | ENSP00000386227 |
| ENSP00000349486 | ENSP00000400258 |
| ENSP00000349496 | ENSP00000377496 |
| ENSP00000349543 | ENSP00000357051 |
| ENSP00000349543 | ENSP00000358312 |
| ENSP00000349543 | ENSP00000407401 |
| ENSP00000349576 | ENSP00000364270 |



|                 |                 |
|-----------------|-----------------|
| ENSP00000349576 | ENSP00000370410 |
| ENSP00000349576 | ENSP00000386394 |
| ENSP00000349577 | ENSP00000354499 |
| ENSP00000349577 | ENSP00000355890 |
| ENSP00000349577 | ENSP00000356104 |
| ENSP00000349577 | ENSP00000368589 |
| ENSP00000349577 | ENSP00000397598 |
| ENSP00000349594 | ENSP00000354951 |
| ENSP00000349594 | ENSP00000362441 |
| ENSP00000349594 | ENSP00000368856 |
| ENSP00000349594 | ENSP00000377372 |
| ENSP00000349594 | ENSP00000381031 |
| ENSP00000349594 | ENSP00000386520 |
| ENSP00000349594 | ENSP00000391723 |
| ENSP00000349594 | ENSP00000401371 |
| ENSP00000349616 | ENSP00000359380 |
| ENSP00000349640 | ENSP00000351908 |
| ENSP00000349640 | ENSP00000355205 |
| ENSP00000349640 | ENSP00000363559 |
| ENSP00000349640 | ENSP00000364403 |
| ENSP00000349640 | ENSP00000382392 |
| ENSP00000349640 | ENSP00000384198 |
| ENSP00000349640 | ENSP00000389427 |
| ENSP00000349640 | ENSP00000391457 |
| ENSP00000349640 | ENSP00000396876 |
| ENSP00000349640 | ENSP00000400476 |
| ENSP00000349640 | ENSP00000404623 |
| ENSP00000349658 | ENSP00000358146 |
| ENSP00000349658 | ENSP00000364699 |
| ENSP00000349658 | ENSP00000370377 |
| ENSP00000349658 | ENSP00000379607 |
| ENSP00000349679 | ENSP00000414187 |
| ENSP00000349723 | ENSP00000362592 |
| ENSP00000349723 | ENSP00000365877 |
| ENSP00000349748 | ENSP00000350249 |
| ENSP00000349748 | ENSP00000353622 |
| ENSP00000349748 | ENSP00000353735 |
| ENSP00000349748 | ENSP00000354522 |
| ENSP00000349748 | ENSP00000355013 |
| ENSP00000349748 | ENSP00000355759 |
| ENSP00000349748 | ENSP00000359321 |
| ENSP00000349748 | ENSP00000360532 |
| ENSP00000349748 | ENSP00000368801 |
| ENSP00000349748 | ENSP00000370083 |
| ENSP00000349748 | ENSP00000370119 |
| ENSP00000349748 | ENSP00000379607 |

|                 |                 |
|-----------------|-----------------|
| ENSP00000349748 | ENSP00000386161 |
| ENSP00000349748 | ENSP00000414187 |
| ENSP00000349783 | ENSP00000351811 |
| ENSP00000349783 | ENSP00000401371 |
| ENSP00000349785 | ENSP00000352510 |
| ENSP00000349785 | ENSP00000356379 |
| ENSP00000349785 | ENSP00000357341 |
| ENSP00000349785 | ENSP00000357998 |
| ENSP00000349785 | ENSP00000362751 |
| ENSP00000349785 | ENSP00000368797 |
| ENSP00000349785 | ENSP00000374455 |
| ENSP00000349785 | ENSP00000388340 |
| ENSP00000349785 | ENSP00000413625 |
| ENSP00000349785 | ENSP00000418661 |
| ENSP00000349803 | ENSP00000369257 |
| ENSP00000349803 | ENSP00000392028 |
| ENSP00000349823 | ENSP00000351284 |
| ENSP00000349823 | ENSP00000369335 |
| ENSP00000349824 | ENSP00000350199 |
| ENSP00000349824 | ENSP00000350297 |
| ENSP00000349824 | ENSP00000351926 |
| ENSP00000349824 | ENSP00000360798 |
| ENSP00000349824 | ENSP00000386456 |
| ENSP00000349877 | ENSP00000349887 |
| ENSP00000349877 | ENSP00000351520 |
| ENSP00000349877 | ENSP00000352738 |
| ENSP00000349877 | ENSP00000353804 |
| ENSP00000349877 | ENSP00000354558 |
| ENSP00000349877 | ENSP00000355261 |
| ENSP00000349877 | ENSP00000356146 |
| ENSP00000349877 | ENSP00000356405 |
| ENSP00000349877 | ENSP00000357998 |
| ENSP00000349877 | ENSP00000361845 |
| ENSP00000349877 | ENSP00000362413 |
| ENSP00000349877 | ENSP00000372720 |
| ENSP00000349877 | ENSP00000380793 |
| ENSP00000349877 | ENSP00000397441 |
| ENSP00000349877 | ENSP00000402240 |
| ENSP00000349877 | ENSP00000415203 |
| ENSP00000349887 | ENSP00000350708 |
| ENSP00000349887 | ENSP00000352738 |
| ENSP00000349887 | ENSP00000357887 |
| ENSP00000349887 | ENSP00000359305 |
| ENSP00000349887 | ENSP00000360183 |
| ENSP00000349887 | ENSP00000360621 |
| ENSP00000349887 | ENSP00000360644 |

|                 |                 |
|-----------------|-----------------|
| ENSP00000349887 | ENSP00000362717 |
| ENSP00000349887 | ENSP00000364794 |
| ENSP00000349887 | ENSP00000377401 |
| ENSP00000349887 | ENSP00000397441 |
| ENSP00000349887 | ENSP00000402240 |
| ENSP00000349892 | ENSP00000360286 |
| ENSP00000349892 | ENSP00000363591 |
| ENSP00000349892 | ENSP00000381045 |
| ENSP00000349892 | ENSP00000381577 |
| ENSP00000349929 | ENSP00000359403 |
| ENSP00000349929 | ENSP00000370588 |
| ENSP00000349929 | ENSP00000378338 |
| ENSP00000349932 | ENSP00000355809 |
| ENSP00000349932 | ENSP00000356595 |
| ENSP00000349932 | ENSP00000373853 |
| ENSP00000349932 | ENSP00000381098 |
| ENSP00000349932 | ENSP00000388373 |
| ENSP00000349959 | ENSP00000351015 |
| ENSP00000349959 | ENSP00000351416 |
| ENSP00000349959 | ENSP00000354558 |
| ENSP00000349959 | ENSP00000354927 |
| ENSP00000349959 | ENSP00000359345 |
| ENSP00000349959 | ENSP00000359552 |
| ENSP00000349959 | ENSP00000361009 |
| ENSP00000349959 | ENSP00000365005 |
| ENSP00000349959 | ENSP00000365891 |
| ENSP00000349959 | ENSP00000366121 |
| ENSP00000349959 | ENSP00000366974 |
| ENSP00000349959 | ENSP00000369757 |
| ENSP00000349959 | ENSP00000371888 |
| ENSP00000349959 | ENSP00000377865 |
| ENSP00000349959 | ENSP00000379709 |
| ENSP00000349959 | ENSP00000389103 |
| ENSP00000349959 | ENSP00000407487 |
| ENSP00000349970 | ENSP00000357048 |
| ENSP00000349970 | ENSP00000379042 |
| ENSP00000349977 | ENSP00000350249 |
| ENSP00000349977 | ENSP00000354554 |
| ENSP00000349977 | ENSP00000356641 |
| ENSP00000349977 | ENSP00000360532 |
| ENSP00000349977 | ENSP00000367265 |
| ENSP00000349977 | ENSP00000369843 |
| ENSP00000349977 | ENSP00000371419 |
| ENSP00000350009 | ENSP00000357861 |
| ENSP00000350009 | ENSP00000359042 |
| ENSP00000350009 | ENSP00000368438 |

|                 |                 |
|-----------------|-----------------|
| ENSP00000350011 | ENSP00000352820 |
| ENSP00000350011 | ENSP00000358563 |
| ENSP00000350011 | ENSP00000370589 |
| ENSP00000350011 | ENSP00000372199 |
| ENSP00000350011 | ENSP00000379607 |
| ENSP00000350012 | ENSP00000357650 |
| ENSP00000350012 | ENSP00000359380 |
| ENSP00000350012 | ENSP00000367407 |
| ENSP00000350012 | ENSP00000369042 |
| ENSP00000350012 | ENSP00000374328 |
| ENSP00000350012 | ENSP00000387262 |
| ENSP00000350032 | ENSP00000362424 |
| ENSP00000350071 | ENSP00000351885 |
| ENSP00000350071 | ENSP00000352676 |
| ENSP00000350071 | ENSP00000358810 |
| ENSP00000350071 | ENSP00000359380 |
| ENSP00000350071 | ENSP00000371888 |
| ENSP00000350071 | ENSP00000386227 |
| ENSP00000350071 | ENSP00000414321 |
| ENSP00000350098 | ENSP00000389182 |
| ENSP00000350098 | ENSP00000403833 |
| ENSP00000350098 | ENSP00000412619 |
| ENSP00000350098 | ENSP00000415046 |
| ENSP00000350162 | ENSP00000354720 |
| ENSP00000350199 | ENSP00000351926 |
| ENSP00000350199 | ENSP00000352603 |
| ENSP00000350199 | ENSP00000356548 |
| ENSP00000350199 | ENSP00000360532 |
| ENSP00000350199 | ENSP00000360798 |
| ENSP00000350199 | ENSP00000364794 |
| ENSP00000350199 | ENSP00000364956 |
| ENSP00000350199 | ENSP00000369757 |
| ENSP00000350199 | ENSP00000369816 |
| ENSP00000350199 | ENSP00000377148 |
| ENSP00000350199 | ENSP00000386456 |
| ENSP00000350199 | ENSP00000388340 |
| ENSP00000350215 | ENSP00000357484 |
| ENSP00000350249 | ENSP00000350633 |
| ENSP00000350249 | ENSP00000351284 |
| ENSP00000350249 | ENSP00000353375 |
| ENSP00000350249 | ENSP00000353701 |
| ENSP00000350249 | ENSP00000354826 |
| ENSP00000350249 | ENSP00000355470 |
| ENSP00000350249 | ENSP00000357711 |
| ENSP00000350249 | ENSP00000357753 |
| ENSP00000350249 | ENSP00000358081 |

|                 |                 |
|-----------------|-----------------|
| ENSP00000350249 | ENSP00000358554 |
| ENSP00000350249 | ENSP00000358563 |
| ENSP00000350249 | ENSP00000358718 |
| ENSP00000350249 | ENSP00000361824 |
| ENSP00000350249 | ENSP00000361894 |
| ENSP00000350249 | ENSP00000363021 |
| ENSP00000350249 | ENSP00000367086 |
| ENSP00000350249 | ENSP00000367263 |
| ENSP00000350249 | ENSP00000369335 |
| ENSP00000350249 | ENSP00000369500 |
| ENSP00000350249 | ENSP00000369757 |
| ENSP00000350249 | ENSP00000370517 |
| ENSP00000350249 | ENSP00000370521 |
| ENSP00000350249 | ENSP00000377496 |
| ENSP00000350249 | ENSP00000379607 |
| ENSP00000350249 | ENSP00000379888 |
| ENSP00000350249 | ENSP00000379933 |
| ENSP00000350249 | ENSP00000386156 |
| ENSP00000350249 | ENSP00000391944 |
| ENSP00000350249 | ENSP00000393583 |
| ENSP00000350249 | ENSP00000397515 |
| ENSP00000350249 | ENSP00000402915 |
| ENSP00000350249 | ENSP00000403536 |
| ENSP00000350249 | ENSP00000407401 |
| ENSP00000350249 | ENSP00000417281 |
| ENSP00000350263 | ENSP00000359848 |
| ENSP00000350263 | ENSP00000360149 |
| ENSP00000350263 | ENSP00000362298 |
| ENSP00000350263 | ENSP00000378306 |
| ENSP00000350263 | ENSP00000379836 |
| ENSP00000350263 | ENSP00000400223 |
| ENSP00000350283 | ENSP00000350681 |
| ENSP00000350283 | ENSP00000350708 |
| ENSP00000350283 | ENSP00000351407 |
| ENSP00000350283 | ENSP00000351926 |
| ENSP00000350283 | ENSP00000352408 |
| ENSP00000350283 | ENSP00000354119 |
| ENSP00000350283 | ENSP00000354927 |
| ENSP00000350283 | ENSP00000355759 |
| ENSP00000350283 | ENSP00000356520 |
| ENSP00000350283 | ENSP00000357047 |
| ENSP00000350283 | ENSP00000357113 |
| ENSP00000350283 | ENSP00000360515 |
| ENSP00000350283 | ENSP00000361052 |
| ENSP00000350283 | ENSP00000362578 |
| ENSP00000350283 | ENSP00000362592 |

|                 |                 |
|-----------------|-----------------|
| ENSP00000350283 | ENSP00000365025 |
| ENSP00000350283 | ENSP00000365588 |
| ENSP00000350283 | ENSP00000366434 |
| ENSP00000350283 | ENSP00000367527 |
| ENSP00000350283 | ENSP00000368459 |
| ENSP00000350283 | ENSP00000368686 |
| ENSP00000350283 | ENSP00000368698 |
| ENSP00000350283 | ENSP00000369497 |
| ENSP00000350283 | ENSP00000371419 |
| ENSP00000350283 | ENSP00000371475 |
| ENSP00000350283 | ENSP00000372023 |
| ENSP00000350283 | ENSP00000372093 |
| ENSP00000350283 | ENSP00000373060 |
| ENSP00000350283 | ENSP00000373952 |
| ENSP00000350283 | ENSP00000377492 |
| ENSP00000350283 | ENSP00000377969 |
| ENSP00000350283 | ENSP00000378180 |
| ENSP00000350283 | ENSP00000378394 |
| ENSP00000350283 | ENSP00000381031 |
| ENSP00000350283 | ENSP00000381045 |
| ENSP00000350283 | ENSP00000381298 |
| ENSP00000350283 | ENSP00000386717 |
| ENSP00000350283 | ENSP00000392617 |
| ENSP00000350283 | ENSP00000399968 |
| ENSP00000350283 | ENSP00000407401 |
| ENSP00000350283 | ENSP00000409167 |
| ENSP00000350283 | ENSP00000417132 |
| ENSP00000350283 | ENSP00000417281 |
| ENSP00000350297 | ENSP00000366746 |
| ENSP00000350297 | ENSP00000378338 |
| ENSP00000350297 | ENSP00000380921 |
| ENSP00000350353 | ENSP00000354673 |
| ENSP00000350359 | ENSP00000358854 |
| ENSP00000350409 | ENSP00000359000 |
| ENSP00000350409 | ENSP00000377280 |
| ENSP00000350409 | ENSP00000377769 |
| ENSP00000350409 | ENSP00000379712 |
| ENSP00000350409 | ENSP00000408236 |
| ENSP00000350447 | ENSP00000417963 |
| ENSP00000350491 | ENSP00000351284 |
| ENSP00000350491 | ENSP00000360286 |
| ENSP00000350491 | ENSP00000361949 |
| ENSP00000350491 | ENSP00000363021 |
| ENSP00000350491 | ENSP00000368349 |
| ENSP00000350491 | ENSP00000369411 |
| ENSP00000350491 | ENSP00000370151 |

|                 |                 |
|-----------------|-----------------|
| ENSP00000350491 | ENSP00000371475 |
| ENSP00000350491 | ENSP00000372023 |
| ENSP00000350491 | ENSP00000376309 |
| ENSP00000350509 | ENSP00000366225 |
| ENSP00000350512 | ENSP00000350785 |
| ENSP00000350512 | ENSP00000351490 |
| ENSP00000350512 | ENSP00000351492 |
| ENSP00000350512 | ENSP00000352565 |
| ENSP00000350512 | ENSP00000353059 |
| ENSP00000350512 | ENSP00000354340 |
| ENSP00000350512 | ENSP00000354673 |
| ENSP00000350512 | ENSP00000354927 |
| ENSP00000350512 | ENSP00000356438 |
| ENSP00000350512 | ENSP00000356652 |
| ENSP00000350512 | ENSP00000357711 |
| ENSP00000350512 | ENSP00000358335 |
| ENSP00000350512 | ENSP00000359818 |
| ENSP00000350512 | ENSP00000360532 |
| ENSP00000350512 | ENSP00000361027 |
| ENSP00000350512 | ENSP00000362873 |
| ENSP00000350512 | ENSP00000363649 |
| ENSP00000350512 | ENSP00000364119 |
| ENSP00000350512 | ENSP00000365439 |
| ENSP00000350512 | ENSP00000368801 |
| ENSP00000350512 | ENSP00000368927 |
| ENSP00000350512 | ENSP00000370410 |
| ENSP00000350512 | ENSP00000370671 |
| ENSP00000350512 | ENSP00000380150 |
| ENSP00000350512 | ENSP00000381863 |
| ENSP00000350512 | ENSP00000382670 |
| ENSP00000350512 | ENSP00000384109 |
| ENSP00000350512 | ENSP00000384211 |
| ENSP00000350512 | ENSP00000384302 |
| ENSP00000350512 | ENSP00000401445 |
| ENSP00000350512 | ENSP00000401508 |
| ENSP00000350512 | ENSP00000402515 |
| ENSP00000350512 | ENSP00000417281 |
| ENSP00000350512 | ENSP00000417748 |
| ENSP00000350549 | ENSP00000360992 |
| ENSP00000350633 | ENSP00000355153 |
| ENSP00000350633 | ENSP00000363089 |
| ENSP00000350633 | ENSP00000364912 |
| ENSP00000350633 | ENSP00000368698 |
| ENSP00000350633 | ENSP00000370671 |
| ENSP00000350633 | ENSP00000397259 |
| ENSP00000350708 | ENSP00000351284 |

|                 |                 |
|-----------------|-----------------|
| ENSP00000350708 | ENSP00000351665 |
| ENSP00000350708 | ENSP00000353622 |
| ENSP00000350708 | ENSP00000354340 |
| ENSP00000350708 | ENSP00000355205 |
| ENSP00000350708 | ENSP00000356579 |
| ENSP00000350708 | ENSP00000358478 |
| ENSP00000350708 | ENSP00000358737 |
| ENSP00000350708 | ENSP00000358994 |
| ENSP00000350708 | ENSP00000360116 |
| ENSP00000350708 | ENSP00000364270 |
| ENSP00000350708 | ENSP00000364403 |
| ENSP00000350708 | ENSP00000365504 |
| ENSP00000350708 | ENSP00000365678 |
| ENSP00000350708 | ENSP00000366271 |
| ENSP00000350708 | ENSP00000370222 |
| ENSP00000350708 | ENSP00000370737 |
| ENSP00000350708 | ENSP00000371846 |
| ENSP00000350708 | ENSP00000375986 |
| ENSP00000350708 | ENSP00000376611 |
| ENSP00000350708 | ENSP00000376758 |
| ENSP00000350708 | ENSP00000379933 |
| ENSP00000350708 | ENSP00000381045 |
| ENSP00000350708 | ENSP00000382562 |
| ENSP00000350708 | ENSP00000384211 |
| ENSP00000350708 | ENSP00000386738 |
| ENSP00000350708 | ENSP00000390783 |
| ENSP00000350708 | ENSP00000395497 |
| ENSP00000350708 | ENSP00000396251 |
| ENSP00000350708 | ENSP00000396937 |
| ENSP00000350708 | ENSP00000401105 |
| ENSP00000350708 | ENSP00000403156 |
| ENSP00000350708 | ENSP00000417748 |
| ENSP00000350708 | ENSP00000418111 |
| ENSP00000350708 | ENSP00000419599 |
| ENSP00000350757 | ENSP00000380431 |
| ENSP00000350767 | ENSP00000351284 |
| ENSP00000350767 | ENSP00000352257 |
| ENSP00000350767 | ENSP00000353622 |
| ENSP00000350767 | ENSP00000354720 |
| ENSP00000350767 | ENSP00000355050 |
| ENSP00000350767 | ENSP00000357965 |
| ENSP00000350767 | ENSP00000360621 |
| ENSP00000350767 | ENSP00000361465 |
| ENSP00000350767 | ENSP00000363779 |
| ENSP00000350767 | ENSP00000364929 |
| ENSP00000350767 | ENSP00000368438 |



|                 |                 |
|-----------------|-----------------|
| ENSP00000350767 | ENSP00000371475 |
| ENSP00000350767 | ENSP00000372023 |
| ENSP00000350767 | ENSP00000374213 |
| ENSP00000350767 | ENSP00000377793 |
| ENSP00000350767 | ENSP00000379607 |
| ENSP00000350767 | ENSP00000381657 |
| ENSP00000350767 | ENSP00000382688 |
| ENSP00000350767 | ENSP00000386759 |
| ENSP00000350767 | ENSP00000411409 |
| ENSP00000350767 | ENSP00000414109 |
| ENSP00000350785 | ENSP00000355167 |
| ENSP00000350785 | ENSP00000355231 |
| ENSP00000350854 | ENSP00000365233 |
| ENSP00000350854 | ENSP00000365943 |
| ENSP00000350869 | ENSP00000404121 |
| ENSP00000350894 | ENSP00000369497 |
| ENSP00000350894 | ENSP00000380921 |
| ENSP00000350894 | ENSP00000381022 |
| ENSP00000350894 | ENSP00000397435 |
| ENSP00000350967 | ENSP00000353246 |
| ENSP00000350967 | ENSP00000353622 |
| ENSP00000350967 | ENSP00000354040 |
| ENSP00000350967 | ENSP00000355013 |
| ENSP00000350967 | ENSP00000360116 |
| ENSP00000350967 | ENSP00000360473 |
| ENSP00000350967 | ENSP00000360515 |
| ENSP00000350967 | ENSP00000360676 |
| ENSP00000350967 | ENSP00000362576 |
| ENSP00000350967 | ENSP00000363308 |
| ENSP00000350967 | ENSP00000363779 |
| ENSP00000350967 | ENSP00000366974 |
| ENSP00000350967 | ENSP00000367029 |
| ENSP00000350967 | ENSP00000374280 |
| ENSP00000350967 | ENSP00000379217 |
| ENSP00000350967 | ENSP00000380460 |
| ENSP00000350967 | ENSP00000382562 |
| ENSP00000350967 | ENSP00000382779 |
| ENSP00000350967 | ENSP00000387471 |
| ENSP00000350967 | ENSP00000412922 |
| ENSP00000350967 | ENSP00000419599 |
| ENSP00000350990 | ENSP00000360532 |
| ENSP00000351015 | ENSP00000355511 |
| ENSP00000351015 | ENSP00000356146 |
| ENSP00000351015 | ENSP00000356825 |
| ENSP00000351015 | ENSP00000360532 |
| ENSP00000351015 | ENSP00000362352 |

|                 |                 |
|-----------------|-----------------|
| ENSP00000351015 | ENSP00000364403 |
| ENSP00000351015 | ENSP00000368730 |
| ENSP00000351015 | ENSP00000372023 |
| ENSP00000351015 | ENSP00000376445 |
| ENSP00000351015 | ENSP00000384675 |
| ENSP00000351015 | ENSP00000394071 |
| ENSP00000351015 | ENSP00000397598 |
| ENSP00000351015 | ENSP00000403397 |
| ENSP00000351015 | ENSP00000419361 |
| ENSP00000351052 | ENSP00000360532 |
| ENSP00000351052 | ENSP00000373700 |
| ENSP00000351100 | ENSP00000353246 |
| ENSP00000351100 | ENSP00000358019 |
| ENSP00000351100 | ENSP00000361467 |
| ENSP00000351100 | ENSP00000380982 |
| ENSP00000351113 | ENSP00000353741 |
| ENSP00000351113 | ENSP00000355596 |
| ENSP00000351113 | ENSP00000363591 |
| ENSP00000351113 | ENSP00000369100 |
| ENSP00000351137 | ENSP00000357631 |
| ENSP00000351137 | ENSP00000358042 |
| ENSP00000351137 | ENSP00000358554 |
| ENSP00000351137 | ENSP00000359454 |
| ENSP00000351137 | ENSP00000360532 |
| ENSP00000351137 | ENSP00000361577 |
| ENSP00000351137 | ENSP00000362041 |
| ENSP00000351137 | ENSP00000362110 |
| ENSP00000351137 | ENSP00000364270 |
| ENSP00000351137 | ENSP00000364289 |
| ENSP00000351137 | ENSP00000364813 |
| ENSP00000351137 | ENSP00000366179 |
| ENSP00000351137 | ENSP00000366557 |
| ENSP00000351137 | ENSP00000367079 |
| ENSP00000351137 | ENSP00000368523 |
| ENSP00000351137 | ENSP00000369409 |
| ENSP00000351137 | ENSP00000371451 |
| ENSP00000351137 | ENSP00000376973 |
| ENSP00000351137 | ENSP00000379607 |
| ENSP00000351137 | ENSP00000387006 |
| ENSP00000351137 | ENSP00000393953 |
| ENSP00000351137 | ENSP00000396301 |
| ENSP00000351137 | ENSP00000400591 |
| ENSP00000351137 | ENSP00000404121 |
| ENSP00000351137 | ENSP00000412566 |
| ENSP00000351137 | ENSP00000414006 |
| ENSP00000351137 | ENSP00000414634 |

|                 |                 |
|-----------------|-----------------|
| ENSP00000351141 | ENSP00000369042 |
| ENSP00000351141 | ENSP00000373474 |
| ENSP00000351141 | ENSP00000379607 |
| ENSP00000351141 | ENSP00000380921 |
| ENSP00000351141 | ENSP00000401277 |
| ENSP00000351170 | ENSP00000369335 |
| ENSP00000351214 | ENSP00000354204 |
| ENSP00000351214 | ENSP00000368140 |
| ENSP00000351214 | ENSP00000387262 |
| ENSP00000351221 | ENSP00000360286 |
| ENSP00000351244 | ENSP00000356489 |
| ENSP00000351250 | ENSP00000354673 |
| ENSP00000351250 | ENSP00000356331 |
| ENSP00000351250 | ENSP00000357047 |
| ENSP00000351250 | ENSP00000358404 |
| ENSP00000351250 | ENSP00000359290 |
| ENSP00000351250 | ENSP00000360371 |
| ENSP00000351250 | ENSP00000392466 |
| ENSP00000351284 | ENSP00000351697 |
| ENSP00000351284 | ENSP00000352257 |
| ENSP00000351284 | ENSP00000353622 |
| ENSP00000351284 | ENSP00000353793 |
| ENSP00000351284 | ENSP00000354522 |
| ENSP00000351284 | ENSP00000354720 |
| ENSP00000351284 | ENSP00000354916 |
| ENSP00000351284 | ENSP00000354957 |
| ENSP00000351284 | ENSP00000355185 |
| ENSP00000351284 | ENSP00000355205 |
| ENSP00000351284 | ENSP00000355261 |
| ENSP00000351284 | ENSP00000356405 |
| ENSP00000351284 | ENSP00000357440 |
| ENSP00000351284 | ENSP00000357602 |
| ENSP00000351284 | ENSP00000358064 |
| ENSP00000351284 | ENSP00000358478 |
| ENSP00000351284 | ENSP00000358576 |
| ENSP00000351284 | ENSP00000359818 |
| ENSP00000351284 | ENSP00000360116 |
| ENSP00000351284 | ENSP00000360216 |
| ENSP00000351284 | ENSP00000360310 |
| ENSP00000351284 | ENSP00000360621 |
| ENSP00000351284 | ENSP00000361310 |
| ENSP00000351284 | ENSP00000361642 |
| ENSP00000351284 | ENSP00000362135 |
| ENSP00000351284 | ENSP00000362352 |
| ENSP00000351284 | ENSP00000362441 |
| ENSP00000351284 | ENSP00000362532 |

|                 |                 |
|-----------------|-----------------|
| ENSP00000351284 | ENSP00000363021 |
| ENSP00000351284 | ENSP00000363313 |
| ENSP00000351284 | ENSP00000364126 |
| ENSP00000351284 | ENSP00000364270 |
| ENSP00000351284 | ENSP00000365588 |
| ENSP00000351284 | ENSP00000366974 |
| ENSP00000351284 | ENSP00000367034 |
| ENSP00000351284 | ENSP00000367527 |
| ENSP00000351284 | ENSP00000367787 |
| ENSP00000351284 | ENSP00000368349 |
| ENSP00000351284 | ENSP00000368438 |
| ENSP00000351284 | ENSP00000368646 |
| ENSP00000351284 | ENSP00000369335 |
| ENSP00000351284 | ENSP00000369411 |
| ENSP00000351284 | ENSP00000370150 |
| ENSP00000351284 | ENSP00000370151 |
| ENSP00000351284 | ENSP00000370222 |
| ENSP00000351284 | ENSP00000371475 |
| ENSP00000351284 | ENSP00000372023 |
| ENSP00000351284 | ENSP00000373060 |
| ENSP00000351284 | ENSP00000373918 |
| ENSP00000351284 | ENSP00000374213 |
| ENSP00000351284 | ENSP00000375809 |
| ENSP00000351284 | ENSP00000377655 |
| ENSP00000351284 | ENSP00000380460 |
| ENSP00000351284 | ENSP00000381657 |
| ENSP00000351284 | ENSP00000382250 |
| ENSP00000351284 | ENSP00000384048 |
| ENSP00000351284 | ENSP00000386992 |
| ENSP00000351284 | ENSP00000387429 |
| ENSP00000351284 | ENSP00000391457 |
| ENSP00000351284 | ENSP00000391944 |
| ENSP00000351284 | ENSP00000394649 |
| ENSP00000351284 | ENSP00000394791 |
| ENSP00000351284 | ENSP00000396484 |
| ENSP00000351284 | ENSP00000400806 |
| ENSP00000351284 | ENSP00000402515 |
| ENSP00000351284 | ENSP00000402527 |
| ENSP00000351284 | ENSP00000404318 |
| ENSP00000351284 | ENSP00000406490 |
| ENSP00000351284 | ENSP00000406868 |
| ENSP00000351284 | ENSP00000407047 |
| ENSP00000351284 | ENSP00000409167 |
| ENSP00000351284 | ENSP00000415212 |
| ENSP00000351284 | ENSP00000416511 |
| ENSP00000351327 | ENSP00000401306 |

|                 |                 |
|-----------------|-----------------|
| ENSP00000351333 | ENSP00000361009 |
| ENSP00000351333 | ENSP00000366121 |
| ENSP00000351333 | ENSP00000376410 |
| ENSP00000351333 | ENSP00000397351 |
| ENSP00000351346 | ENSP00000365233 |
| ENSP00000351346 | ENSP00000365943 |
| ENSP00000351346 | ENSP00000397441 |
| ENSP00000351352 | ENSP00000357907 |
| ENSP00000351380 | ENSP00000354040 |
| ENSP00000351380 | ENSP00000367498 |
| ENSP00000351380 | ENSP00000377640 |
| ENSP00000351380 | ENSP00000386227 |
| ENSP00000351407 | ENSP00000355759 |
| ENSP00000351407 | ENSP00000357341 |
| ENSP00000351407 | ENSP00000357348 |
| ENSP00000351407 | ENSP00000361186 |
| ENSP00000351407 | ENSP00000377969 |
| ENSP00000351407 | ENSP00000381840 |
| ENSP00000351407 | ENSP00000399968 |
| ENSP00000351407 | ENSP00000402527 |
| ENSP00000351416 | ENSP00000357494 |
| ENSP00000351416 | ENSP00000417132 |
| ENSP00000351416 | ENSP00000417281 |
| ENSP00000351490 | ENSP00000358862 |
| ENSP00000351490 | ENSP00000359567 |
| ENSP00000351490 | ENSP00000362608 |
| ENSP00000351490 | ENSP00000363787 |
| ENSP00000351490 | ENSP00000364895 |
| ENSP00000351490 | ENSP00000372699 |
| ENSP00000351490 | ENSP00000374213 |
| ENSP00000351490 | ENSP00000376849 |
| ENSP00000351490 | ENSP00000382562 |
| ENSP00000351490 | ENSP00000396271 |
| ENSP00000351490 | ENSP00000396439 |
| ENSP00000351490 | ENSP00000400572 |
| ENSP00000351490 | ENSP00000412190 |
| ENSP00000351490 | ENSP00000414187 |
| ENSP00000351492 | ENSP00000359454 |
| ENSP00000351492 | ENSP00000360532 |
| ENSP00000351492 | ENSP00000370460 |
| ENSP00000351492 | ENSP00000376973 |
| ENSP00000351492 | ENSP00000404151 |
| ENSP00000351520 | ENSP00000352522 |
| ENSP00000351520 | ENSP00000365840 |
| ENSP00000351524 | ENSP00000356146 |
| ENSP00000351524 | ENSP00000363021 |

|                 |                 |
|-----------------|-----------------|
| ENSP00000351524 | ENSP00000366843 |
| ENSP00000351524 | ENSP00000369335 |
| ENSP00000351524 | ENSP00000370150 |
| ENSP00000351552 | ENSP00000353622 |
| ENSP00000351552 | ENSP00000360532 |
| ENSP00000351552 | ENSP00000362592 |
| ENSP00000351552 | ENSP00000392028 |
| ENSP00000351575 | ENSP00000355899 |
| ENSP00000351575 | ENSP00000359531 |
| ENSP00000351575 | ENSP00000366828 |
| ENSP00000351575 | ENSP00000366974 |
| ENSP00000351575 | ENSP00000388872 |
| ENSP00000351593 | ENSP00000363055 |
| ENSP00000351593 | ENSP00000370557 |
| ENSP00000351596 | ENSP00000351697 |
| ENSP00000351596 | ENSP00000352738 |
| ENSP00000351596 | ENSP00000354522 |
| ENSP00000351596 | ENSP00000354916 |
| ENSP00000351596 | ENSP00000356405 |
| ENSP00000351596 | ENSP00000356811 |
| ENSP00000351596 | ENSP00000359454 |
| ENSP00000351596 | ENSP00000359837 |
| ENSP00000351596 | ENSP00000359939 |
| ENSP00000351596 | ENSP00000361076 |
| ENSP00000351596 | ENSP00000361433 |
| ENSP00000351596 | ENSP00000363308 |
| ENSP00000351596 | ENSP00000364543 |
| ENSP00000351596 | ENSP00000366179 |
| ENSP00000351596 | ENSP00000368565 |
| ENSP00000351596 | ENSP00000368887 |
| ENSP00000351596 | ENSP00000368984 |
| ENSP00000351596 | ENSP00000372093 |
| ENSP00000351596 | ENSP00000373715 |
| ENSP00000351596 | ENSP00000379217 |
| ENSP00000351596 | ENSP00000380460 |
| ENSP00000351596 | ENSP00000388340 |
| ENSP00000351596 | ENSP00000398597 |
| ENSP00000351596 | ENSP00000403817 |
| ENSP00000351596 | ENSP00000417229 |
| ENSP00000351602 | ENSP00000368699 |
| ENSP00000351644 | ENSP00000352516 |
| ENSP00000351644 | ENSP00000367030 |
| ENSP00000351644 | ENSP00000367637 |
| ENSP00000351644 | ENSP00000402038 |
| ENSP00000351665 | ENSP00000354158 |
| ENSP00000351665 | ENSP00000354558 |

|                 |                 |
|-----------------|-----------------|
| ENSP00000351665 | ENSP00000354791 |
| ENSP00000351665 | ENSP00000355560 |
| ENSP00000351665 | ENSP00000355890 |
| ENSP00000351665 | ENSP00000355922 |
| ENSP00000351665 | ENSP00000356989 |
| ENSP00000351665 | ENSP00000357651 |
| ENSP00000351665 | ENSP00000358283 |
| ENSP00000351665 | ENSP00000358994 |
| ENSP00000351665 | ENSP00000360065 |
| ENSP00000351665 | ENSP00000360473 |
| ENSP00000351665 | ENSP00000361800 |
| ENSP00000351665 | ENSP00000368976 |
| ENSP00000351665 | ENSP00000374566 |
| ENSP00000351665 | ENSP00000377793 |
| ENSP00000351665 | ENSP00000382177 |
| ENSP00000351665 | ENSP00000382492 |
| ENSP00000351665 | ENSP00000383145 |
| ENSP00000351665 | ENSP00000384290 |
| ENSP00000351665 | ENSP00000408910 |
| ENSP00000351665 | ENSP00000414402 |
| ENSP00000351665 | ENSP00000414906 |
| ENSP00000351682 | ENSP00000354347 |
| ENSP00000351682 | ENSP00000366395 |
| ENSP00000351682 | ENSP00000377280 |
| ENSP00000351686 | ENSP00000417132 |
| ENSP00000351697 | ENSP00000352257 |
| ENSP00000351697 | ENSP00000353793 |
| ENSP00000351697 | ENSP00000355185 |
| ENSP00000351697 | ENSP00000355388 |
| ENSP00000351697 | ENSP00000358478 |
| ENSP00000351697 | ENSP00000358576 |
| ENSP00000351697 | ENSP00000359818 |
| ENSP00000351697 | ENSP00000360116 |
| ENSP00000351697 | ENSP00000360216 |
| ENSP00000351697 | ENSP00000361310 |
| ENSP00000351697 | ENSP00000362824 |
| ENSP00000351697 | ENSP00000364126 |
| ENSP00000351697 | ENSP00000364270 |
| ENSP00000351697 | ENSP00000365588 |
| ENSP00000351697 | ENSP00000367527 |
| ENSP00000351697 | ENSP00000367787 |
| ENSP00000351697 | ENSP00000368349 |
| ENSP00000351697 | ENSP00000368438 |
| ENSP00000351697 | ENSP00000369335 |
| ENSP00000351697 | ENSP00000370150 |
| ENSP00000351697 | ENSP00000370151 |

|                 |                 |
|-----------------|-----------------|
| ENSP00000351697 | ENSP00000370222 |
| ENSP00000351697 | ENSP00000370376 |
| ENSP00000351697 | ENSP00000371475 |
| ENSP00000351697 | ENSP00000372023 |
| ENSP00000351697 | ENSP00000372316 |
| ENSP00000351697 | ENSP00000373060 |
| ENSP00000351697 | ENSP00000375809 |
| ENSP00000351697 | ENSP00000377914 |
| ENSP00000351697 | ENSP00000381657 |
| ENSP00000351697 | ENSP00000382779 |
| ENSP00000351697 | ENSP00000384048 |
| ENSP00000351697 | ENSP00000386759 |
| ENSP00000351697 | ENSP00000387429 |
| ENSP00000351697 | ENSP00000394649 |
| ENSP00000351697 | ENSP00000401018 |
| ENSP00000351697 | ENSP00000404318 |
| ENSP00000351697 | ENSP00000406490 |
| ENSP00000351697 | ENSP00000406868 |
| ENSP00000351697 | ENSP00000407047 |
| ENSP00000351697 | ENSP00000407401 |
| ENSP00000351697 | ENSP00000409167 |
| ENSP00000351811 | ENSP00000360532 |
| ENSP00000351811 | ENSP00000373272 |
| ENSP00000351811 | ENSP00000373715 |
| ENSP00000351813 | ENSP00000401980 |
| ENSP00000351832 | ENSP00000398597 |
| ENSP00000351885 | ENSP00000354522 |
| ENSP00000351885 | ENSP00000354558 |
| ENSP00000351885 | ENSP00000362608 |
| ENSP00000351885 | ENSP00000372023 |
| ENSP00000351885 | ENSP00000378306 |
| ENSP00000351885 | ENSP00000379093 |
| ENSP00000351885 | ENSP00000380129 |
| ENSP00000351885 | ENSP00000381461 |
| ENSP00000351885 | ENSP00000402084 |
| ENSP00000351885 | ENSP00000410758 |
| ENSP00000351885 | ENSP00000417281 |
| ENSP00000351885 | ENSP00000417963 |
| ENSP00000351894 | ENSP00000352257 |
| ENSP00000351894 | ENSP00000354522 |
| ENSP00000351894 | ENSP00000355759 |
| ENSP00000351894 | ENSP00000357047 |
| ENSP00000351894 | ENSP00000371475 |
| ENSP00000351894 | ENSP00000381098 |
| ENSP00000351894 | ENSP00000384048 |
| ENSP00000351894 | ENSP00000414187 |



|                 |                 |
|-----------------|-----------------|
| ENSP00000351908 | ENSP00000352219 |
| ENSP00000351908 | ENSP00000354927 |
| ENSP00000351908 | ENSP00000358335 |
| ENSP00000351908 | ENSP00000362751 |
| ENSP00000351908 | ENSP00000369860 |
| ENSP00000351908 | ENSP00000369862 |
| ENSP00000351908 | ENSP00000370083 |
| ENSP00000351908 | ENSP00000370119 |
| ENSP00000351908 | ENSP00000373700 |
| ENSP00000351908 | ENSP00000378306 |
| ENSP00000351908 | ENSP00000389934 |
| ENSP00000351908 | ENSP00000396876 |
| ENSP00000351908 | ENSP00000401445 |
| ENSP00000351926 | ENSP00000352603 |
| ENSP00000351926 | ENSP00000354519 |
| ENSP00000351926 | ENSP00000360076 |
| ENSP00000351926 | ENSP00000360777 |
| ENSP00000351926 | ENSP00000360798 |
| ENSP00000351926 | ENSP00000361162 |
| ENSP00000351926 | ENSP00000362115 |
| ENSP00000351926 | ENSP00000362727 |
| ENSP00000351926 | ENSP00000369816 |
| ENSP00000351926 | ENSP00000377665 |
| ENSP00000351926 | ENSP00000380414 |
| ENSP00000351926 | ENSP00000386165 |
| ENSP00000351926 | ENSP00000386456 |
| ENSP00000351926 | ENSP00000388340 |
| ENSP00000351947 | ENSP00000352257 |
| ENSP00000351947 | ENSP00000353458 |
| ENSP00000351947 | ENSP00000353622 |
| ENSP00000351947 | ENSP00000354346 |
| ENSP00000351947 | ENSP00000354522 |
| ENSP00000351947 | ENSP00000354720 |
| ENSP00000351947 | ENSP00000355759 |
| ENSP00000351947 | ENSP00000356290 |
| ENSP00000351947 | ENSP00000356520 |
| ENSP00000351947 | ENSP00000358400 |
| ENSP00000351947 | ENSP00000360031 |
| ENSP00000351947 | ENSP00000360532 |
| ENSP00000351947 | ENSP00000361180 |
| ENSP00000351947 | ENSP00000361219 |
| ENSP00000351947 | ENSP00000363745 |
| ENSP00000351947 | ENSP00000363944 |
| ENSP00000351947 | ENSP00000364289 |
| ENSP00000351947 | ENSP00000365439 |
| ENSP00000351947 | ENSP00000367029 |

|                 |                 |
|-----------------|-----------------|
| ENSP00000351947 | ENSP00000368438 |
| ENSP00000351947 | ENSP00000369335 |
| ENSP00000351947 | ENSP00000369411 |
| ENSP00000351947 | ENSP00000370151 |
| ENSP00000351947 | ENSP00000371101 |
| ENSP00000351947 | ENSP00000378350 |
| ENSP00000351947 | ENSP00000382688 |
| ENSP00000351947 | ENSP00000392617 |
| ENSP00000351947 | ENSP00000394394 |
| ENSP00000351947 | ENSP00000396439 |
| ENSP00000351947 | ENSP00000397441 |
| ENSP00000351947 | ENSP00000402240 |
| ENSP00000351947 | ENSP00000404121 |
| ENSP00000351947 | ENSP00000417980 |
| ENSP00000352021 | ENSP00000354040 |
| ENSP00000352021 | ENSP00000355899 |
| ENSP00000352021 | ENSP00000356448 |
| ENSP00000352021 | ENSP00000358400 |
| ENSP00000352021 | ENSP00000359345 |
| ENSP00000352021 | ENSP00000359688 |
| ENSP00000352021 | ENSP00000360031 |
| ENSP00000352021 | ENSP00000360412 |
| ENSP00000352021 | ENSP00000361076 |
| ENSP00000352021 | ENSP00000362153 |
| ENSP00000352021 | ENSP00000363559 |
| ENSP00000352021 | ENSP00000364320 |
| ENSP00000352021 | ENSP00000366135 |
| ENSP00000352021 | ENSP00000366519 |
| ENSP00000352021 | ENSP00000370736 |
| ENSP00000352021 | ENSP00000372199 |
| ENSP00000352021 | ENSP00000377640 |
| ENSP00000352021 | ENSP00000379888 |
| ENSP00000352021 | ENSP00000382392 |
| ENSP00000352021 | ENSP00000386992 |
| ENSP00000352021 | ENSP00000393393 |
| ENSP00000352021 | ENSP00000402338 |
| ENSP00000352047 | ENSP00000360532 |
| ENSP00000352121 | ENSP00000352802 |
| ENSP00000352121 | ENSP00000354558 |
| ENSP00000352121 | ENSP00000355231 |
| ENSP00000352121 | ENSP00000358423 |
| ENSP00000352121 | ENSP00000360310 |
| ENSP00000352121 | ENSP00000364893 |
| ENSP00000352121 | ENSP00000365891 |
| ENSP00000352121 | ENSP00000368438 |
| ENSP00000352121 | ENSP00000369335 |

|                 |                 |
|-----------------|-----------------|
| ENSP00000352121 | ENSP00000370151 |
| ENSP00000352121 | ENSP00000373399 |
| ENSP00000352121 | ENSP00000378338 |
| ENSP00000352121 | ENSP00000402515 |
| ENSP00000352175 | ENSP00000368927 |
| ENSP00000352175 | ENSP00000379500 |
| ENSP00000352185 | ENSP00000355388 |
| ENSP00000352185 | ENSP00000355958 |
| ENSP00000352185 | ENSP00000365877 |
| ENSP00000352219 | ENSP00000353826 |
| ENSP00000352219 | ENSP00000354554 |
| ENSP00000352219 | ENSP00000362576 |
| ENSP00000352219 | ENSP00000362751 |
| ENSP00000352219 | ENSP00000369860 |
| ENSP00000352219 | ENSP00000369862 |
| ENSP00000352219 | ENSP00000411584 |
| ENSP00000352257 | ENSP00000352514 |
| ENSP00000352257 | ENSP00000353142 |
| ENSP00000352257 | ENSP00000353458 |
| ENSP00000352257 | ENSP00000354522 |
| ENSP00000352257 | ENSP00000354720 |
| ENSP00000352257 | ENSP00000354723 |
| ENSP00000352257 | ENSP00000354957 |
| ENSP00000352257 | ENSP00000355011 |
| ENSP00000352257 | ENSP00000355261 |
| ENSP00000352257 | ENSP00000355759 |
| ENSP00000352257 | ENSP00000356448 |
| ENSP00000352257 | ENSP00000356520 |
| ENSP00000352257 | ENSP00000356953 |
| ENSP00000352257 | ENSP00000356988 |
| ENSP00000352257 | ENSP00000358064 |
| ENSP00000352257 | ENSP00000358404 |
| ENSP00000352257 | ENSP00000359818 |
| ENSP00000352257 | ENSP00000360216 |
| ENSP00000352257 | ENSP00000361310 |
| ENSP00000352257 | ENSP00000362135 |
| ENSP00000352257 | ENSP00000362532 |
| ENSP00000352257 | ENSP00000363021 |
| ENSP00000352257 | ENSP00000364929 |
| ENSP00000352257 | ENSP00000366974 |
| ENSP00000352257 | ENSP00000367034 |
| ENSP00000352257 | ENSP00000367787 |
| ENSP00000352257 | ENSP00000368332 |
| ENSP00000352257 | ENSP00000368349 |
| ENSP00000352257 | ENSP00000368438 |
| ENSP00000352257 | ENSP00000368801 |

|                 |                 |
|-----------------|-----------------|
| ENSP00000352257 | ENSP00000368824 |
| ENSP00000352257 | ENSP00000369335 |
| ENSP00000352257 | ENSP00000369411 |
| ENSP00000352257 | ENSP00000370151 |
| ENSP00000352257 | ENSP00000370421 |
| ENSP00000352257 | ENSP00000371475 |
| ENSP00000352257 | ENSP00000372023 |
| ENSP00000352257 | ENSP00000377655 |
| ENSP00000352257 | ENSP00000379607 |
| ENSP00000352257 | ENSP00000380504 |
| ENSP00000352257 | ENSP00000381045 |
| ENSP00000352257 | ENSP00000386239 |
| ENSP00000352257 | ENSP00000394791 |
| ENSP00000352257 | ENSP00000400806 |
| ENSP00000352257 | ENSP00000402515 |
| ENSP00000352257 | ENSP00000402527 |
| ENSP00000352257 | ENSP00000404121 |
| ENSP00000352257 | ENSP00000414187 |
| ENSP00000352257 | ENSP00000417281 |
| ENSP00000352257 | ENSP00000420588 |
| ENSP00000352265 | ENSP00000368591 |
| ENSP00000352272 | ENSP00000355296 |
| ENSP00000352308 | ENSP00000354673 |
| ENSP00000352308 | ENSP00000358812 |
| ENSP00000352308 | ENSP00000360412 |
| ENSP00000352308 | ENSP00000360532 |
| ENSP00000352308 | ENSP00000363018 |
| ENSP00000352308 | ENSP00000373404 |
| ENSP00000352308 | ENSP00000393953 |
| ENSP00000352400 | ENSP00000352738 |
| ENSP00000352400 | ENSP00000360286 |
| ENSP00000352400 | ENSP00000361433 |
| ENSP00000352400 | ENSP00000364289 |
| ENSP00000352400 | ENSP00000366135 |
| ENSP00000352400 | ENSP00000366249 |
| ENSP00000352400 | ENSP00000368699 |
| ENSP00000352400 | ENSP00000368856 |
| ENSP00000352400 | ENSP00000369042 |
| ENSP00000352400 | ENSP00000371155 |
| ENSP00000352400 | ENSP00000373039 |
| ENSP00000352400 | ENSP00000379607 |
| ENSP00000352400 | ENSP00000382779 |
| ENSP00000352400 | ENSP00000396152 |
| ENSP00000352400 | ENSP00000410416 |
| ENSP00000352408 | ENSP00000362456 |
| ENSP00000352408 | ENSP00000366434 |

|                 |                 |
|-----------------|-----------------|
| ENSP00000352408 | ENSP00000367498 |
| ENSP00000352408 | ENSP00000381293 |
| ENSP00000352408 | ENSP00000394382 |
| ENSP00000352408 | ENSP00000419851 |
| ENSP00000352425 | ENSP00000354251 |
| ENSP00000352425 | ENSP00000361467 |
| ENSP00000352425 | ENSP00000373347 |
| ENSP00000352425 | ENSP00000380150 |
| ENSP00000352425 | ENSP00000390948 |
| ENSP00000352425 | ENSP00000392896 |
| ENSP00000352455 | ENSP00000370125 |
| ENSP00000352455 | ENSP00000370555 |
| ENSP00000352455 | ENSP00000379383 |
| ENSP00000352463 | ENSP00000365439 |
| ENSP00000352463 | ENSP00000376204 |
| ENSP00000352514 | ENSP00000354794 |
| ENSP00000352514 | ENSP00000357255 |
| ENSP00000352514 | ENSP00000362592 |
| ENSP00000352514 | ENSP00000365877 |
| ENSP00000352514 | ENSP00000375986 |
| ENSP00000352514 | ENSP00000398930 |
| ENSP00000352514 | ENSP00000415151 |
| ENSP00000352516 | ENSP00000355958 |
| ENSP00000352516 | ENSP00000360025 |
| ENSP00000352516 | ENSP00000362592 |
| ENSP00000352516 | ENSP00000365877 |
| ENSP00000352516 | ENSP00000368438 |
| ENSP00000352516 | ENSP00000379607 |
| ENSP00000352516 | ENSP00000380921 |
| ENSP00000352516 | ENSP00000384490 |
| ENSP00000352516 | ENSP00000390475 |
| ENSP00000352516 | ENSP00000395535 |
| ENSP00000352516 | ENSP00000396876 |
| ENSP00000352516 | ENSP00000404658 |
| ENSP00000352522 | ENSP00000354522 |
| ENSP00000352522 | ENSP00000354673 |
| ENSP00000352522 | ENSP00000356263 |
| ENSP00000352522 | ENSP00000363162 |
| ENSP00000352522 | ENSP00000365840 |
| ENSP00000352522 | ENSP00000373082 |
| ENSP00000352522 | ENSP00000389065 |
| ENSP00000352522 | ENSP00000411327 |
| ENSP00000352522 | ENSP00000412553 |
| ENSP00000352522 | ENSP00000413319 |
| ENSP00000352522 | ENSP00000414373 |
| ENSP00000352527 | ENSP00000360060 |

|                 |                 |
|-----------------|-----------------|
| ENSP00000352565 | ENSP00000357348 |
| ENSP00000352565 | ENSP00000369075 |
| ENSP00000352565 | ENSP00000417963 |
| ENSP00000352572 | ENSP00000355596 |
| ENSP00000352572 | ENSP00000360310 |
| ENSP00000352572 | ENSP00000360532 |
| ENSP00000352572 | ENSP00000360540 |
| ENSP00000352572 | ENSP00000368976 |
| ENSP00000352572 | ENSP00000369716 |
| ENSP00000352572 | ENSP00000369871 |
| ENSP00000352572 | ENSP00000381657 |
| ENSP00000352572 | ENSP00000382562 |
| ENSP00000352572 | ENSP00000402084 |
| ENSP00000352603 | ENSP00000360798 |
| ENSP00000352603 | ENSP00000365891 |
| ENSP00000352603 | ENSP00000366603 |
| ENSP00000352603 | ENSP00000381290 |
| ENSP00000352603 | ENSP00000396292 |
| ENSP00000352608 | ENSP00000413152 |
| ENSP00000352645 | ENSP00000355955 |
| ENSP00000352645 | ENSP00000359688 |
| ENSP00000352645 | ENSP00000369860 |
| ENSP00000352645 | ENSP00000377914 |
| ENSP00000352645 | ENSP00000402338 |
| ENSP00000352655 | ENSP00000353344 |
| ENSP00000352655 | ENSP00000355968 |
| ENSP00000352655 | ENSP00000379836 |
| ENSP00000352668 | ENSP00000366863 |
| ENSP00000352668 | ENSP00000387170 |
| ENSP00000352673 | ENSP00000357047 |
| ENSP00000352673 | ENSP00000360798 |
| ENSP00000352673 | ENSP00000368699 |
| ENSP00000352673 | ENSP00000373918 |
| ENSP00000352673 | ENSP00000381031 |
| ENSP00000352673 | ENSP00000391944 |
| ENSP00000352676 | ENSP00000356652 |
| ENSP00000352676 | ENSP00000358810 |
| ENSP00000352676 | ENSP00000360268 |
| ENSP00000352676 | ENSP00000382269 |
| ENSP00000352678 | ENSP00000353246 |
| ENSP00000352678 | ENSP00000354040 |
| ENSP00000352678 | ENSP00000356548 |
| ENSP00000352678 | ENSP00000357807 |
| ENSP00000352678 | ENSP00000358812 |
| ENSP00000352678 | ENSP00000360412 |
| ENSP00000352678 | ENSP00000361465 |

|                 |                 |
|-----------------|-----------------|
| ENSP00000352678 | ENSP00000366135 |
| ENSP00000352678 | ENSP00000372445 |
| ENSP00000352678 | ENSP00000393953 |
| ENSP00000352706 | ENSP00000357807 |
| ENSP00000352706 | ENSP00000359691 |
| ENSP00000352706 | ENSP00000360366 |
| ENSP00000352706 | ENSP00000362036 |
| ENSP00000352706 | ENSP00000362208 |
| ENSP00000352706 | ENSP00000363972 |
| ENSP00000352706 | ENSP00000366030 |
| ENSP00000352706 | ENSP00000367086 |
| ENSP00000352706 | ENSP00000368439 |
| ENSP00000352706 | ENSP00000368605 |
| ENSP00000352706 | ENSP00000372445 |
| ENSP00000352706 | ENSP00000387426 |
| ENSP00000352708 | ENSP00000360183 |
| ENSP00000352708 | ENSP00000370616 |
| ENSP00000352708 | ENSP00000373979 |
| ENSP00000352708 | ENSP00000397441 |
| ENSP00000352708 | ENSP00000402935 |
| ENSP00000352738 | ENSP00000353246 |
| ENSP00000352738 | ENSP00000353804 |
| ENSP00000352738 | ENSP00000354039 |
| ENSP00000352738 | ENSP00000354040 |
| ENSP00000352738 | ENSP00000354125 |
| ENSP00000352738 | ENSP00000354347 |
| ENSP00000352738 | ENSP00000354558 |
| ENSP00000352738 | ENSP00000355051 |
| ENSP00000352738 | ENSP00000355231 |
| ENSP00000352738 | ENSP00000355890 |
| ENSP00000352738 | ENSP00000356807 |
| ENSP00000352738 | ENSP00000357048 |
| ENSP00000352738 | ENSP00000357494 |
| ENSP00000352738 | ENSP00000357887 |
| ENSP00000352738 | ENSP00000358140 |
| ENSP00000352738 | ENSP00000358563 |
| ENSP00000352738 | ENSP00000358812 |
| ENSP00000352738 | ENSP00000361577 |
| ENSP00000352738 | ENSP00000361845 |
| ENSP00000352738 | ENSP00000362153 |
| ENSP00000352738 | ENSP00000362413 |
| ENSP00000352738 | ENSP00000362936 |
| ENSP00000352738 | ENSP00000363308 |
| ENSP00000352738 | ENSP00000366434 |
| ENSP00000352738 | ENSP00000366519 |
| ENSP00000352738 | ENSP00000366607 |

|                 |                 |
|-----------------|-----------------|
| ENSP00000352738 | ENSP00000370258 |
| ENSP00000352738 | ENSP00000370589 |
| ENSP00000352738 | ENSP00000374213 |
| ENSP00000352738 | ENSP00000376268 |
| ENSP00000352738 | ENSP00000377262 |
| ENSP00000352738 | ENSP00000379228 |
| ENSP00000352738 | ENSP00000379607 |
| ENSP00000352738 | ENSP00000380460 |
| ENSP00000352738 | ENSP00000382392 |
| ENSP00000352738 | ENSP00000384302 |
| ENSP00000352738 | ENSP00000386759 |
| ENSP00000352738 | ENSP00000388872 |
| ENSP00000352738 | ENSP00000396704 |
| ENSP00000352738 | ENSP00000402240 |
| ENSP00000352738 | ENSP00000402338 |
| ENSP00000352738 | ENSP00000412566 |
| ENSP00000352738 | ENSP00000417229 |
| ENSP00000352738 | ENSP00000417281 |
| ENSP00000352798 | ENSP00000356774 |
| ENSP00000352798 | ENSP00000384169 |
| ENSP00000352798 | ENSP00000404923 |
| ENSP00000352802 | ENSP00000358994 |
| ENSP00000352802 | ENSP00000359380 |
| ENSP00000352802 | ENSP00000360798 |
| ENSP00000352802 | ENSP00000365891 |
| ENSP00000352802 | ENSP00000366121 |
| ENSP00000352802 | ENSP00000368801 |
| ENSP00000352802 | ENSP00000378624 |
| ENSP00000352802 | ENSP00000379709 |
| ENSP00000352802 | ENSP00000380450 |
| ENSP00000352802 | ENSP00000380921 |
| ENSP00000352802 | ENSP00000381045 |
| ENSP00000352802 | ENSP00000407487 |
| ENSP00000352802 | ENSP00000413625 |
| ENSP00000352820 | ENSP00000356811 |
| ENSP00000352820 | ENSP00000360310 |
| ENSP00000352820 | ENSP00000361433 |
| ENSP00000352821 | ENSP00000361949 |
| ENSP00000352821 | ENSP00000363329 |
| ENSP00000352927 | ENSP00000360532 |
| ENSP00000352928 | ENSP00000355317 |
| ENSP00000352928 | ENSP00000357048 |
| ENSP00000352928 | ENSP00000362413 |
| ENSP00000352928 | ENSP00000364404 |
| ENSP00000352928 | ENSP00000366156 |
| ENSP00000352928 | ENSP00000366225 |



|                 |                 |
|-----------------|-----------------|
| ENSP00000352928 | ENSP00000367992 |
| ENSP00000352928 | ENSP00000384109 |
| ENSP00000352928 | ENSP00000391249 |
| ENSP00000352928 | ENSP00000408994 |
| ENSP00000352928 | ENSP00000419851 |
| ENSP00000353010 | ENSP00000360286 |
| ENSP00000353010 | ENSP00000360782 |
| ENSP00000353059 | ENSP00000356811 |
| ENSP00000353059 | ENSP00000358854 |
| ENSP00000353059 | ENSP00000360310 |
| ENSP00000353059 | ENSP00000361433 |
| ENSP00000353059 | ENSP00000362413 |
| ENSP00000353059 | ENSP00000363680 |
| ENSP00000353059 | ENSP00000373715 |
| ENSP00000353059 | ENSP00000393596 |
| ENSP00000353059 | ENSP00000398597 |
| ENSP00000353073 | ENSP00000358716 |
| ENSP00000353073 | ENSP00000358997 |
| ENSP00000353073 | ENSP00000359484 |
| ENSP00000353073 | ENSP00000361686 |
| ENSP00000353073 | ENSP00000364188 |
| ENSP00000353073 | ENSP00000366748 |
| ENSP00000353073 | ENSP00000387262 |
| ENSP00000353073 | ENSP00000407487 |
| ENSP00000353094 | ENSP00000363021 |
| ENSP00000353098 | ENSP00000376946 |
| ENSP00000353098 | ENSP00000404923 |
| ENSP00000353104 | ENSP00000354687 |
| ENSP00000353104 | ENSP00000359976 |
| ENSP00000353104 | ENSP00000360644 |
| ENSP00000353104 | ENSP00000361667 |
| ENSP00000353132 | ENSP00000372023 |
| ENSP00000353154 | ENSP00000396915 |
| ENSP00000353238 | ENSP00000396876 |
| ENSP00000353246 | ENSP00000354040 |
| ENSP00000353246 | ENSP00000358716 |
| ENSP00000353246 | ENSP00000359688 |
| ENSP00000353246 | ENSP00000360412 |
| ENSP00000353246 | ENSP00000360828 |
| ENSP00000353246 | ENSP00000361232 |
| ENSP00000353246 | ENSP00000363313 |
| ENSP00000353246 | ENSP00000368887 |
| ENSP00000353246 | ENSP00000377640 |
| ENSP00000353246 | ENSP00000380495 |
| ENSP00000353246 | ENSP00000382779 |
| ENSP00000353246 | ENSP00000384302 |

|                 |                 |
|-----------------|-----------------|
| ENSP00000353246 | ENSP00000392270 |
| ENSP00000353332 | ENSP00000356694 |
| ENSP00000353332 | ENSP00000359818 |
| ENSP00000353332 | ENSP00000363157 |
| ENSP00000353332 | ENSP00000364270 |
| ENSP00000353332 | ENSP00000366135 |
| ENSP00000353332 | ENSP00000369335 |
| ENSP00000353332 | ENSP00000382562 |
| ENSP00000353332 | ENSP00000388872 |
| ENSP00000353332 | ENSP00000394649 |
| ENSP00000353332 | ENSP00000406868 |
| ENSP00000353344 | ENSP00000357494 |
| ENSP00000353344 | ENSP00000359474 |
| ENSP00000353344 | ENSP00000364912 |
| ENSP00000353344 | ENSP00000367440 |
| ENSP00000353344 | ENSP00000368686 |
| ENSP00000353344 | ENSP00000374467 |
| ENSP00000353344 | ENSP00000381891 |
| ENSP00000353344 | ENSP00000404623 |
| ENSP00000353362 | ENSP00000367841 |
| ENSP00000353362 | ENSP00000381293 |
| ENSP00000353362 | ENSP00000390329 |
| ENSP00000353373 | ENSP00000368818 |
| ENSP00000353375 | ENSP00000355884 |
| ENSP00000353375 | ENSP00000362424 |
| ENSP00000353375 | ENSP00000379607 |
| ENSP00000353375 | ENSP00000380921 |
| ENSP00000353393 | ENSP00000360997 |
| ENSP00000353393 | ENSP00000364709 |
| ENSP00000353452 | ENSP00000373700 |
| ENSP00000353458 | ENSP00000353622 |
| ENSP00000353458 | ENSP00000360031 |
| ENSP00000353458 | ENSP00000360532 |
| ENSP00000353458 | ENSP00000361180 |
| ENSP00000353458 | ENSP00000362592 |
| ENSP00000353458 | ENSP00000366974 |
| ENSP00000353458 | ENSP00000369335 |
| ENSP00000353458 | ENSP00000369716 |
| ENSP00000353458 | ENSP00000377747 |
| ENSP00000353458 | ENSP00000401445 |
| ENSP00000353508 | ENSP00000355884 |
| ENSP00000353508 | ENSP00000414187 |
| ENSP00000353508 | ENSP00000417281 |
| ENSP00000353564 | ENSP00000355231 |
| ENSP00000353564 | ENSP00000355721 |
| ENSP00000353564 | ENSP00000362399 |

|                 |                 |
|-----------------|-----------------|
| ENSP00000353564 | ENSP00000369409 |
| ENSP00000353564 | ENSP00000377665 |
| ENSP00000353564 | ENSP00000380450 |
| ENSP00000353564 | ENSP00000382177 |
| ENSP00000353564 | ENSP00000389934 |
| ENSP00000353564 | ENSP00000404232 |
| ENSP00000353575 | ENSP00000364119 |
| ENSP00000353575 | ENSP00000373509 |
| ENSP00000353575 | ENSP00000382595 |
| ENSP00000353575 | ENSP00000394869 |
| ENSP00000353622 | ENSP00000353735 |
| ENSP00000353622 | ENSP00000354522 |
| ENSP00000353622 | ENSP00000354558 |
| ENSP00000353622 | ENSP00000354850 |
| ENSP00000353622 | ENSP00000355205 |
| ENSP00000353622 | ENSP00000356405 |
| ENSP00000353622 | ENSP00000356846 |
| ENSP00000353622 | ENSP00000357348 |
| ENSP00000353622 | ENSP00000357887 |
| ENSP00000353622 | ENSP00000357965 |
| ENSP00000353622 | ENSP00000358716 |
| ENSP00000353622 | ENSP00000358918 |
| ENSP00000353622 | ENSP00000359067 |
| ENSP00000353622 | ENSP00000360515 |
| ENSP00000353622 | ENSP00000360532 |
| ENSP00000353622 | ENSP00000360644 |
| ENSP00000353622 | ENSP00000361245 |
| ENSP00000353622 | ENSP00000361418 |
| ENSP00000353622 | ENSP00000362592 |
| ENSP00000353622 | ENSP00000362748 |
| ENSP00000353622 | ENSP00000362824 |
| ENSP00000353622 | ENSP00000363779 |
| ENSP00000353622 | ENSP00000364893 |
| ENSP00000353622 | ENSP00000364929 |
| ENSP00000353622 | ENSP00000364946 |
| ENSP00000353622 | ENSP00000365025 |
| ENSP00000353622 | ENSP00000365811 |
| ENSP00000353622 | ENSP00000366271 |
| ENSP00000353622 | ENSP00000366974 |
| ENSP00000353622 | ENSP00000367034 |
| ENSP00000353622 | ENSP00000367797 |
| ENSP00000353622 | ENSP00000368686 |
| ENSP00000353622 | ENSP00000368856 |
| ENSP00000353622 | ENSP00000369351 |
| ENSP00000353622 | ENSP00000369716 |
| ENSP00000353622 | ENSP00000369736 |

|                 |                 |
|-----------------|-----------------|
| ENSP00000353622 | ENSP00000370083 |
| ENSP00000353622 | ENSP00000371475 |
| ENSP00000353622 | ENSP00000371875 |
| ENSP00000353622 | ENSP00000374213 |
| ENSP00000353622 | ENSP00000374529 |
| ENSP00000353622 | ENSP00000379217 |
| ENSP00000353622 | ENSP00000379228 |
| ENSP00000353622 | ENSP00000379836 |
| ENSP00000353622 | ENSP00000380460 |
| ENSP00000353622 | ENSP00000381045 |
| ENSP00000353622 | ENSP00000382562 |
| ENSP00000353622 | ENSP00000382688 |
| ENSP00000353622 | ENSP00000386759 |
| ENSP00000353622 | ENSP00000392601 |
| ENSP00000353622 | ENSP00000395535 |
| ENSP00000353622 | ENSP00000396620 |
| ENSP00000353622 | ENSP00000402240 |
| ENSP00000353622 | ENSP00000403397 |
| ENSP00000353622 | ENSP00000412922 |
| ENSP00000353622 | ENSP00000420588 |
| ENSP00000353655 | ENSP00000361465 |
| ENSP00000353670 | ENSP00000356448 |
| ENSP00000353698 | ENSP00000357048 |
| ENSP00000353698 | ENSP00000357748 |
| ENSP00000353698 | ENSP00000357887 |
| ENSP00000353698 | ENSP00000358140 |
| ENSP00000353698 | ENSP00000359904 |
| ENSP00000353698 | ENSP00000362413 |
| ENSP00000353698 | ENSP00000362900 |
| ENSP00000353698 | ENSP00000368305 |
| ENSP00000353698 | ENSP00000372023 |
| ENSP00000353698 | ENSP00000372857 |
| ENSP00000353698 | ENSP00000380129 |
| ENSP00000353698 | ENSP00000381932 |
| ENSP00000353701 | ENSP00000354791 |
| ENSP00000353701 | ENSP00000358140 |
| ENSP00000353701 | ENSP00000370031 |
| ENSP00000353701 | ENSP00000396593 |
| ENSP00000353735 | ENSP00000354522 |
| ENSP00000353735 | ENSP00000354951 |
| ENSP00000353735 | ENSP00000355759 |
| ENSP00000353735 | ENSP00000357113 |
| ENSP00000353735 | ENSP00000360286 |
| ENSP00000353735 | ENSP00000362592 |
| ENSP00000353735 | ENSP00000364398 |
| ENSP00000353735 | ENSP00000366607 |

|                 |                 |
|-----------------|-----------------|
| ENSP00000353735 | ENSP00000378350 |
| ENSP00000353741 | ENSP00000355601 |
| ENSP00000353741 | ENSP00000356290 |
| ENSP00000353741 | ENSP00000356623 |
| ENSP00000353741 | ENSP00000357494 |
| ENSP00000353741 | ENSP00000358140 |
| ENSP00000353741 | ENSP00000358417 |
| ENSP00000353741 | ENSP00000360532 |
| ENSP00000353741 | ENSP00000364119 |
| ENSP00000353741 | ENSP00000364815 |
| ENSP00000353741 | ENSP00000369038 |
| ENSP00000353741 | ENSP00000369500 |
| ENSP00000353741 | ENSP00000369897 |
| ENSP00000353741 | ENSP00000370719 |
| ENSP00000353741 | ENSP00000372326 |
| ENSP00000353741 | ENSP00000377617 |
| ENSP00000353741 | ENSP00000388275 |
| ENSP00000353741 | ENSP00000388872 |
| ENSP00000353741 | ENSP00000391944 |
| ENSP00000353741 | ENSP00000401121 |
| ENSP00000353741 | ENSP00000402515 |
| ENSP00000353741 | ENSP00000403359 |
| ENSP00000353741 | ENSP00000412553 |
| ENSP00000353741 | ENSP00000415316 |
| ENSP00000353793 | ENSP00000354522 |
| ENSP00000353793 | ENSP00000354720 |
| ENSP00000353793 | ENSP00000358147 |
| ENSP00000353793 | ENSP00000358478 |
| ENSP00000353793 | ENSP00000360473 |
| ENSP00000353793 | ENSP00000361990 |
| ENSP00000353793 | ENSP00000364270 |
| ENSP00000353793 | ENSP00000365588 |
| ENSP00000353793 | ENSP00000368349 |
| ENSP00000353793 | ENSP00000369335 |
| ENSP00000353793 | ENSP00000369411 |
| ENSP00000353793 | ENSP00000370151 |
| ENSP00000353793 | ENSP00000371475 |
| ENSP00000353793 | ENSP00000372023 |
| ENSP00000353793 | ENSP00000373060 |
| ENSP00000353793 | ENSP00000374280 |
| ENSP00000353793 | ENSP00000374566 |
| ENSP00000353793 | ENSP00000378350 |
| ENSP00000353793 | ENSP00000382562 |
| ENSP00000353793 | ENSP00000384048 |
| ENSP00000353793 | ENSP00000386759 |
| ENSP00000353793 | ENSP00000387429 |

|                 |                 |
|-----------------|-----------------|
| ENSP00000353793 | ENSP00000396484 |
| ENSP00000353793 | ENSP00000399968 |
| ENSP00000353793 | ENSP00000401018 |
| ENSP00000353793 | ENSP00000402515 |
| ENSP00000353793 | ENSP00000404318 |
| ENSP00000353793 | ENSP00000409167 |
| ENSP00000353793 | ENSP00000413632 |
| ENSP00000353793 | ENSP00000415212 |
| ENSP00000353793 | ENSP00000416511 |
| ENSP00000353793 | ENSP00000417963 |
| ENSP00000353804 | ENSP00000360149 |
| ENSP00000353804 | ENSP00000367079 |
| ENSP00000353826 | ENSP00000356290 |
| ENSP00000353826 | ENSP00000356329 |
| ENSP00000353826 | ENSP00000356587 |
| ENSP00000353826 | ENSP00000361202 |
| ENSP00000353826 | ENSP00000361287 |
| ENSP00000353826 | ENSP00000362344 |
| ENSP00000353826 | ENSP00000365016 |
| ENSP00000353826 | ENSP00000367637 |
| ENSP00000353826 | ENSP00000368140 |
| ENSP00000353826 | ENSP00000377617 |
| ENSP00000353826 | ENSP00000397435 |
| ENSP00000353826 | ENSP00000417763 |
| ENSP00000353854 | ENSP00000391249 |
| ENSP00000353904 | ENSP00000360183 |
| ENSP00000353904 | ENSP00000381293 |
| ENSP00000353904 | ENSP00000403397 |
| ENSP00000353920 | ENSP00000357459 |
| ENSP00000353971 | ENSP00000362546 |
| ENSP00000353998 | ENSP00000354347 |
| ENSP00000353998 | ENSP00000355958 |
| ENSP00000353998 | ENSP00000362576 |
| ENSP00000353998 | ENSP00000362688 |
| ENSP00000353998 | ENSP00000364699 |
| ENSP00000353998 | ENSP00000371888 |
| ENSP00000353998 | ENSP00000376946 |
| ENSP00000354006 | ENSP00000407879 |
| ENSP00000354039 | ENSP00000415363 |
| ENSP00000354040 | ENSP00000355899 |
| ENSP00000354040 | ENSP00000358400 |
| ENSP00000354040 | ENSP00000358563 |
| ENSP00000354040 | ENSP00000358716 |
| ENSP00000354040 | ENSP00000359345 |
| ENSP00000354040 | ENSP00000359688 |
| ENSP00000354040 | ENSP00000360031 |

|                 |                 |
|-----------------|-----------------|
| ENSP00000354040 | ENSP00000360412 |
| ENSP00000354040 | ENSP00000360621 |
| ENSP00000354040 | ENSP00000360828 |
| ENSP00000354040 | ENSP00000361076 |
| ENSP00000354040 | ENSP00000361232 |
| ENSP00000354040 | ENSP00000361982 |
| ENSP00000354040 | ENSP00000362153 |
| ENSP00000354040 | ENSP00000362688 |
| ENSP00000354040 | ENSP00000363018 |
| ENSP00000354040 | ENSP00000363313 |
| ENSP00000354040 | ENSP00000363384 |
| ENSP00000354040 | ENSP00000363559 |
| ENSP00000354040 | ENSP00000363676 |
| ENSP00000354040 | ENSP00000363944 |
| ENSP00000354040 | ENSP00000364037 |
| ENSP00000354040 | ENSP00000364119 |
| ENSP00000354040 | ENSP00000364320 |
| ENSP00000354040 | ENSP00000365806 |
| ENSP00000354040 | ENSP00000366519 |
| ENSP00000354040 | ENSP00000368612 |
| ENSP00000354040 | ENSP00000368887 |
| ENSP00000354040 | ENSP00000370589 |
| ENSP00000354040 | ENSP00000371201 |
| ENSP00000354040 | ENSP00000373090 |
| ENSP00000354040 | ENSP00000373404 |
| ENSP00000354040 | ENSP00000374390 |
| ENSP00000354040 | ENSP00000375730 |
| ENSP00000354040 | ENSP00000377640 |
| ENSP00000354040 | ENSP00000377865 |
| ENSP00000354040 | ENSP00000379607 |
| ENSP00000354040 | ENSP00000379888 |
| ENSP00000354040 | ENSP00000380495 |
| ENSP00000354040 | ENSP00000380982 |
| ENSP00000354040 | ENSP00000382392 |
| ENSP00000354040 | ENSP00000382779 |
| ENSP00000354040 | ENSP00000384302 |
| ENSP00000354040 | ENSP00000388464 |
| ENSP00000354040 | ENSP00000389103 |
| ENSP00000354040 | ENSP00000392270 |
| ENSP00000354040 | ENSP00000394290 |
| ENSP00000354040 | ENSP00000397598 |
| ENSP00000354040 | ENSP00000402338 |
| ENSP00000354040 | ENSP00000403576 |
| ENSP00000354040 | ENSP00000409074 |
| ENSP00000354040 | ENSP00000409367 |
| ENSP00000354040 | ENSP00000411162 |

|                 |                 |
|-----------------|-----------------|
| ENSP00000354040 | ENSP00000413152 |
| ENSP00000354040 | ENSP00000419740 |
| ENSP00000354045 | ENSP00000363055 |
| ENSP00000354045 | ENSP00000379607 |
| ENSP00000354061 | ENSP00000360532 |
| ENSP00000354061 | ENSP00000370589 |
| ENSP00000354119 | ENSP00000354566 |
| ENSP00000354119 | ENSP00000354782 |
| ENSP00000354119 | ENSP00000357013 |
| ENSP00000354119 | ENSP00000360916 |
| ENSP00000354119 | ENSP00000364898 |
| ENSP00000354119 | ENSP00000366936 |
| ENSP00000354119 | ENSP00000381863 |
| ENSP00000354119 | ENSP00000394049 |
| ENSP00000354125 | ENSP00000354558 |
| ENSP00000354125 | ENSP00000358140 |
| ENSP00000354125 | ENSP00000358563 |
| ENSP00000354125 | ENSP00000359531 |
| ENSP00000354125 | ENSP00000360532 |
| ENSP00000354125 | ENSP00000360621 |
| ENSP00000354125 | ENSP00000361418 |
| ENSP00000354125 | ENSP00000361949 |
| ENSP00000354125 | ENSP00000361982 |
| ENSP00000354125 | ENSP00000362688 |
| ENSP00000354125 | ENSP00000362744 |
| ENSP00000354125 | ENSP00000363308 |
| ENSP00000354125 | ENSP00000363559 |
| ENSP00000354125 | ENSP00000364119 |
| ENSP00000354125 | ENSP00000364289 |
| ENSP00000354125 | ENSP00000365025 |
| ENSP00000354125 | ENSP00000368927 |
| ENSP00000354125 | ENSP00000369335 |
| ENSP00000354125 | ENSP00000369757 |
| ENSP00000354125 | ENSP00000371236 |
| ENSP00000354125 | ENSP00000373082 |
| ENSP00000354125 | ENSP00000373404 |
| ENSP00000354125 | ENSP00000377769 |
| ENSP00000354125 | ENSP00000379607 |
| ENSP00000354125 | ENSP00000379888 |
| ENSP00000354125 | ENSP00000387006 |
| ENSP00000354125 | ENSP00000389065 |
| ENSP00000354125 | ENSP00000402240 |
| ENSP00000354125 | ENSP00000411327 |
| ENSP00000354125 | ENSP00000412553 |
| ENSP00000354125 | ENSP00000413319 |
| ENSP00000354125 | ENSP00000414373 |



|                 |                 |
|-----------------|-----------------|
| ENSP00000354125 | ENSP00000416892 |
| ENSP00000354125 | ENSP00000417763 |
| ENSP00000354158 | ENSP00000354791 |
| ENSP00000354158 | ENSP00000356903 |
| ENSP00000354158 | ENSP00000356989 |
| ENSP00000354158 | ENSP00000358335 |
| ENSP00000354158 | ENSP00000361824 |
| ENSP00000354158 | ENSP00000368797 |
| ENSP00000354158 | ENSP00000368976 |
| ENSP00000354158 | ENSP00000374566 |
| ENSP00000354158 | ENSP00000377793 |
| ENSP00000354158 | ENSP00000379607 |
| ENSP00000354158 | ENSP00000380921 |
| ENSP00000354201 | ENSP00000355028 |
| ENSP00000354201 | ENSP00000356562 |
| ENSP00000354201 | ENSP00000361990 |
| ENSP00000354201 | ENSP00000366395 |
| ENSP00000354201 | ENSP00000396068 |
| ENSP00000354201 | ENSP00000417281 |
| ENSP00000354204 | ENSP00000357051 |
| ENSP00000354204 | ENSP00000357360 |
| ENSP00000354204 | ENSP00000391723 |
| ENSP00000354207 | ENSP00000358997 |
| ENSP00000354207 | ENSP00000374455 |
| ENSP00000354207 | ENSP00000397297 |
| ENSP00000354207 | ENSP00000405963 |
| ENSP00000354251 | ENSP00000390948 |
| ENSP00000354270 | ENSP00000358497 |
| ENSP00000354270 | ENSP00000361699 |
| ENSP00000354270 | ENSP00000383599 |
| ENSP00000354313 | ENSP00000360500 |
| ENSP00000354313 | ENSP00000379394 |
| ENSP00000354340 | ENSP00000355013 |
| ENSP00000354340 | ENSP00000359939 |
| ENSP00000354340 | ENSP00000366434 |
| ENSP00000354340 | ENSP00000368646 |
| ENSP00000354340 | ENSP00000384109 |
| ENSP00000354346 | ENSP00000355596 |
| ENSP00000354346 | ENSP00000358478 |
| ENSP00000354346 | ENSP00000360532 |
| ENSP00000354346 | ENSP00000365439 |
| ENSP00000354346 | ENSP00000379607 |
| ENSP00000354346 | ENSP00000384048 |
| ENSP00000354347 | ENSP00000354673 |
| ENSP00000354347 | ENSP00000355890 |
| ENSP00000354347 | ENSP00000360327 |

|                 |                 |
|-----------------|-----------------|
| ENSP00000354347 | ENSP00000360532 |
| ENSP00000354347 | ENSP00000361287 |
| ENSP00000354347 | ENSP00000363205 |
| ENSP00000354347 | ENSP00000364986 |
| ENSP00000354347 | ENSP00000365534 |
| ENSP00000354347 | ENSP00000366746 |
| ENSP00000354347 | ENSP00000367923 |
| ENSP00000354347 | ENSP00000368438 |
| ENSP00000354347 | ENSP00000370883 |
| ENSP00000354347 | ENSP00000373082 |
| ENSP00000354347 | ENSP00000377527 |
| ENSP00000354347 | ENSP00000377865 |
| ENSP00000354347 | ENSP00000389065 |
| ENSP00000354347 | ENSP00000411327 |
| ENSP00000354347 | ENSP00000412553 |
| ENSP00000354347 | ENSP00000413319 |
| ENSP00000354347 | ENSP00000414373 |
| ENSP00000354361 | ENSP00000363021 |
| ENSP00000354361 | ENSP00000417281 |
| ENSP00000354478 | ENSP00000408792 |
| ENSP00000354486 | ENSP00000354522 |
| ENSP00000354486 | ENSP00000360310 |
| ENSP00000354486 | ENSP00000362424 |
| ENSP00000354486 | ENSP00000362656 |
| ENSP00000354486 | ENSP00000368976 |
| ENSP00000354486 | ENSP00000381657 |
| ENSP00000354486 | ENSP00000382562 |
| ENSP00000354486 | ENSP00000386227 |
| ENSP00000354486 | ENSP00000393596 |
| ENSP00000354486 | ENSP00000399511 |
| ENSP00000354486 | ENSP00000402084 |
| ENSP00000354497 | ENSP00000367910 |
| ENSP00000354497 | ENSP00000368438 |
| ENSP00000354497 | ENSP00000369411 |
| ENSP00000354497 | ENSP00000384015 |
| ENSP00000354497 | ENSP00000406490 |
| ENSP00000354498 | ENSP00000380921 |
| ENSP00000354499 | ENSP00000354554 |
| ENSP00000354499 | ENSP00000354632 |
| ENSP00000354499 | ENSP00000354876 |
| ENSP00000354499 | ENSP00000354982 |
| ENSP00000354499 | ENSP00000355572 |
| ENSP00000354499 | ENSP00000359211 |
| ENSP00000354499 | ENSP00000360268 |
| ENSP00000354499 | ENSP00000360782 |
| ENSP00000354499 | ENSP00000361042 |

|                 |                 |
|-----------------|-----------------|
| ENSP00000354499 | ENSP00000362936 |
| ENSP00000354499 | ENSP00000367934 |
| ENSP00000354499 | ENSP00000368646 |
| ENSP00000354499 | ENSP00000368790 |
| ENSP00000354499 | ENSP00000387262 |
| ENSP00000354518 | ENSP00000360488 |
| ENSP00000354518 | ENSP00000362094 |
| ENSP00000354518 | ENSP00000380969 |
| ENSP00000354518 | ENSP00000396301 |
| ENSP00000354518 | ENSP00000404121 |
| ENSP00000354519 | ENSP00000360149 |
| ENSP00000354519 | ENSP00000360183 |
| ENSP00000354519 | ENSP00000360644 |
| ENSP00000354519 | ENSP00000362115 |
| ENSP00000354519 | ENSP00000362399 |
| ENSP00000354519 | ENSP00000363944 |
| ENSP00000354519 | ENSP00000363985 |
| ENSP00000354519 | ENSP00000366225 |
| ENSP00000354519 | ENSP00000376268 |
| ENSP00000354519 | ENSP00000377148 |
| ENSP00000354519 | ENSP00000384651 |
| ENSP00000354519 | ENSP00000397441 |
| ENSP00000354519 | ENSP00000409275 |
| ENSP00000354522 | ENSP00000355153 |
| ENSP00000354522 | ENSP00000355759 |
| ENSP00000354522 | ENSP00000356520 |
| ENSP00000354522 | ENSP00000356989 |
| ENSP00000354522 | ENSP00000357643 |
| ENSP00000354522 | ENSP00000359939 |
| ENSP00000354522 | ENSP00000359988 |
| ENSP00000354522 | ENSP00000360270 |
| ENSP00000354522 | ENSP00000360473 |
| ENSP00000354522 | ENSP00000360515 |
| ENSP00000354522 | ENSP00000360532 |
| ENSP00000354522 | ENSP00000360798 |
| ENSP00000354522 | ENSP00000360938 |
| ENSP00000354522 | ENSP00000361418 |
| ENSP00000354522 | ENSP00000362344 |
| ENSP00000354522 | ENSP00000363384 |
| ENSP00000354522 | ENSP00000363745 |
| ENSP00000354522 | ENSP00000364929 |
| ENSP00000354522 | ENSP00000365439 |
| ENSP00000354522 | ENSP00000365588 |
| ENSP00000354522 | ENSP00000366135 |
| ENSP00000354522 | ENSP00000366565 |
| ENSP00000354522 | ENSP00000366974 |

|                 |                 |
|-----------------|-----------------|
| ENSP00000354522 | ENSP00000367029 |
| ENSP00000354522 | ENSP00000368438 |
| ENSP00000354522 | ENSP00000368565 |
| ENSP00000354522 | ENSP00000369335 |
| ENSP00000354522 | ENSP00000369411 |
| ENSP00000354522 | ENSP00000370151 |
| ENSP00000354522 | ENSP00000370589 |
| ENSP00000354522 | ENSP00000371236 |
| ENSP00000354522 | ENSP00000371475 |
| ENSP00000354522 | ENSP00000373060 |
| ENSP00000354522 | ENSP00000374213 |
| ENSP00000354522 | ENSP00000376309 |
| ENSP00000354522 | ENSP00000377655 |
| ENSP00000354522 | ENSP00000379607 |
| ENSP00000354522 | ENSP00000382392 |
| ENSP00000354522 | ENSP00000382779 |
| ENSP00000354522 | ENSP00000384048 |
| ENSP00000354522 | ENSP00000386992 |
| ENSP00000354522 | ENSP00000387429 |
| ENSP00000354522 | ENSP00000394791 |
| ENSP00000354522 | ENSP00000400806 |
| ENSP00000354522 | ENSP00000402240 |
| ENSP00000354522 | ENSP00000402527 |
| ENSP00000354522 | ENSP00000404318 |
| ENSP00000354522 | ENSP00000406490 |
| ENSP00000354522 | ENSP00000406888 |
| ENSP00000354522 | ENSP00000409167 |
| ENSP00000354525 | ENSP00000359345 |
| ENSP00000354525 | ENSP00000361076 |
| ENSP00000354525 | ENSP00000362744 |
| ENSP00000354525 | ENSP00000363018 |
| ENSP00000354525 | ENSP00000363384 |
| ENSP00000354525 | ENSP00000363676 |
| ENSP00000354525 | ENSP00000364320 |
| ENSP00000354525 | ENSP00000369757 |
| ENSP00000354525 | ENSP00000373404 |
| ENSP00000354525 | ENSP00000375730 |
| ENSP00000354525 | ENSP00000377486 |
| ENSP00000354525 | ENSP00000377640 |
| ENSP00000354525 | ENSP00000377865 |
| ENSP00000354525 | ENSP00000378160 |
| ENSP00000354525 | ENSP00000380156 |
| ENSP00000354525 | ENSP00000386717 |
| ENSP00000354525 | ENSP00000389103 |
| ENSP00000354525 | ENSP00000391723 |
| ENSP00000354525 | ENSP00000393241 |

|                 |                 |
|-----------------|-----------------|
| ENSP00000354525 | ENSP00000393393 |
| ENSP00000354525 | ENSP00000403175 |
| ENSP00000354525 | ENSP00000412583 |
| ENSP00000354525 | ENSP00000414321 |
| ENSP00000354525 | ENSP00000416110 |
| ENSP00000354532 | ENSP00000355471 |
| ENSP00000354532 | ENSP00000357880 |
| ENSP00000354532 | ENSP00000420588 |
| ENSP00000354554 | ENSP00000354632 |
| ENSP00000354554 | ENSP00000354876 |
| ENSP00000354554 | ENSP00000354982 |
| ENSP00000354554 | ENSP00000359526 |
| ENSP00000354554 | ENSP00000360782 |
| ENSP00000354554 | ENSP00000362936 |
| ENSP00000354554 | ENSP00000367637 |
| ENSP00000354554 | ENSP00000367934 |
| ENSP00000354554 | ENSP00000377954 |
| ENSP00000354554 | ENSP00000387262 |
| ENSP00000354558 | ENSP00000354739 |
| ENSP00000354558 | ENSP00000354916 |
| ENSP00000354558 | ENSP00000354927 |
| ENSP00000354558 | ENSP00000356405 |
| ENSP00000354558 | ENSP00000356448 |
| ENSP00000354558 | ENSP00000358423 |
| ENSP00000354558 | ENSP00000358810 |
| ENSP00000354558 | ENSP00000359345 |
| ENSP00000354558 | ENSP00000361009 |
| ENSP00000354558 | ENSP00000361180 |
| ENSP00000354558 | ENSP00000362115 |
| ENSP00000354558 | ENSP00000362314 |
| ENSP00000354558 | ENSP00000362546 |
| ENSP00000354558 | ENSP00000362688 |
| ENSP00000354558 | ENSP00000364289 |
| ENSP00000354558 | ENSP00000364486 |
| ENSP00000354558 | ENSP00000364893 |
| ENSP00000354558 | ENSP00000365005 |
| ENSP00000354558 | ENSP00000365891 |
| ENSP00000354558 | ENSP00000366843 |
| ENSP00000354558 | ENSP00000366863 |
| ENSP00000354558 | ENSP00000366974 |
| ENSP00000354558 | ENSP00000369335 |
| ENSP00000354558 | ENSP00000369757 |
| ENSP00000354558 | ENSP00000369810 |
| ENSP00000354558 | ENSP00000371888 |
| ENSP00000354558 | ENSP00000372023 |
| ENSP00000354558 | ENSP00000372697 |

|                 |                 |
|-----------------|-----------------|
| ENSP00000354558 | ENSP00000374399 |
| ENSP00000354558 | ENSP00000375881 |
| ENSP00000354558 | ENSP00000377865 |
| ENSP00000354558 | ENSP00000378529 |
| ENSP00000354558 | ENSP00000379093 |
| ENSP00000354558 | ENSP00000384313 |
| ENSP00000354558 | ENSP00000388340 |
| ENSP00000354558 | ENSP00000389103 |
| ENSP00000354558 | ENSP00000390831 |
| ENSP00000354558 | ENSP00000391197 |
| ENSP00000354558 | ENSP00000391723 |
| ENSP00000354558 | ENSP00000404016 |
| ENSP00000354558 | ENSP00000406988 |
| ENSP00000354558 | ENSP00000409952 |
| ENSP00000354558 | ENSP00000417085 |
| ENSP00000354558 | ENSP00000417963 |
| ENSP00000354560 | ENSP00000354720 |
| ENSP00000354560 | ENSP00000355596 |
| ENSP00000354560 | ENSP00000357051 |
| ENSP00000354560 | ENSP00000361824 |
| ENSP00000354560 | ENSP00000363899 |
| ENSP00000354560 | ENSP00000367766 |
| ENSP00000354566 | ENSP00000354782 |
| ENSP00000354566 | ENSP00000364898 |
| ENSP00000354566 | ENSP00000376544 |
| ENSP00000354566 | ENSP00000396704 |
| ENSP00000354574 | ENSP00000389399 |
| ENSP00000354586 | ENSP00000358918 |
| ENSP00000354586 | ENSP00000359206 |
| ENSP00000354586 | ENSP00000367197 |
| ENSP00000354586 | ENSP00000367797 |
| ENSP00000354586 | ENSP00000392028 |
| ENSP00000354620 | ENSP00000357047 |
| ENSP00000354623 | ENSP00000367408 |
| ENSP00000354632 | ENSP00000354982 |
| ENSP00000354632 | ENSP00000358737 |
| ENSP00000354632 | ENSP00000370414 |
| ENSP00000354633 | ENSP00000355051 |
| ENSP00000354633 | ENSP00000358854 |
| ENSP00000354633 | ENSP00000358886 |
| ENSP00000354633 | ENSP00000359290 |
| ENSP00000354633 | ENSP00000359531 |
| ENSP00000354633 | ENSP00000362068 |
| ENSP00000354633 | ENSP00000363812 |
| ENSP00000354633 | ENSP00000367406 |
| ENSP00000354633 | ENSP00000369695 |

|                 |                 |
|-----------------|-----------------|
| ENSP00000354633 | ENSP00000377969 |
| ENSP00000354633 | ENSP00000379372 |
| ENSP00000354633 | ENSP00000384597 |
| ENSP00000354633 | ENSP00000396620 |
| ENSP00000354673 | ENSP00000355051 |
| ENSP00000354673 | ENSP00000355261 |
| ENSP00000354673 | ENSP00000356448 |
| ENSP00000354673 | ENSP00000357602 |
| ENSP00000354673 | ENSP00000357907 |
| ENSP00000354673 | ENSP00000359818 |
| ENSP00000354673 | ENSP00000360473 |
| ENSP00000354673 | ENSP00000360992 |
| ENSP00000354673 | ENSP00000361287 |
| ENSP00000354673 | ENSP00000361949 |
| ENSP00000354673 | ENSP00000363734 |
| ENSP00000354673 | ENSP00000363779 |
| ENSP00000354673 | ENSP00000364320 |
| ENSP00000354673 | ENSP00000366135 |
| ENSP00000354673 | ENSP00000367029 |
| ENSP00000354673 | ENSP00000368984 |
| ENSP00000354673 | ENSP00000369965 |
| ENSP00000354673 | ENSP00000371155 |
| ENSP00000354673 | ENSP00000372694 |
| ENSP00000354673 | ENSP00000374529 |
| ENSP00000354673 | ENSP00000376204 |
| ENSP00000354673 | ENSP00000379217 |
| ENSP00000354673 | ENSP00000379888 |
| ENSP00000354673 | ENSP00000380460 |
| ENSP00000354673 | ENSP00000387170 |
| ENSP00000354673 | ENSP00000391723 |
| ENSP00000354673 | ENSP00000394400 |
| ENSP00000354673 | ENSP00000401371 |
| ENSP00000354673 | ENSP00000403817 |
| ENSP00000354673 | ENSP00000412319 |
| ENSP00000354673 | ENSP00000415678 |
| ENSP00000354673 | ENSP00000418734 |
| ENSP00000354676 | ENSP00000354742 |
| ENSP00000354676 | ENSP00000364188 |
| ENSP00000354676 | ENSP00000389649 |
| ENSP00000354676 | ENSP00000397435 |
| ENSP00000354681 | ENSP00000358497 |
| ENSP00000354681 | ENSP00000360183 |
| ENSP00000354681 | ENSP00000366482 |
| ENSP00000354687 | ENSP00000356972 |
| ENSP00000354687 | ENSP00000375730 |
| ENSP00000354718 | ENSP00000363591 |

|                 |                 |
|-----------------|-----------------|
| ENSP00000354718 | ENSP00000363812 |
| ENSP00000354720 | ENSP00000355167 |
| ENSP00000354720 | ENSP00000357047 |
| ENSP00000354720 | ENSP00000360286 |
| ENSP00000354720 | ENSP00000360532 |
| ENSP00000354720 | ENSP00000361310 |
| ENSP00000354720 | ENSP00000361875 |
| ENSP00000354720 | ENSP00000362424 |
| ENSP00000354720 | ENSP00000362441 |
| ENSP00000354720 | ENSP00000364126 |
| ENSP00000354720 | ENSP00000364293 |
| ENSP00000354720 | ENSP00000364847 |
| ENSP00000354720 | ENSP00000366974 |
| ENSP00000354720 | ENSP00000367034 |
| ENSP00000354720 | ENSP00000367766 |
| ENSP00000354720 | ENSP00000369411 |
| ENSP00000354720 | ENSP00000372023 |
| ENSP00000354720 | ENSP00000372689 |
| ENSP00000354720 | ENSP00000382562 |
| ENSP00000354720 | ENSP00000384048 |
| ENSP00000354720 | ENSP00000386520 |
| ENSP00000354720 | ENSP00000395535 |
| ENSP00000354720 | ENSP00000396704 |
| ENSP00000354720 | ENSP00000402527 |
| ENSP00000354720 | ENSP00000406490 |
| ENSP00000354720 | ENSP00000420588 |
| ENSP00000354723 | ENSP00000354742 |
| ENSP00000354723 | ENSP00000354977 |
| ENSP00000354723 | ENSP00000355205 |
| ENSP00000354723 | ENSP00000360621 |
| ENSP00000354739 | ENSP00000356811 |
| ENSP00000354739 | ENSP00000356920 |
| ENSP00000354739 | ENSP00000359345 |
| ENSP00000354739 | ENSP00000360532 |
| ENSP00000354739 | ENSP00000361076 |
| ENSP00000354739 | ENSP00000362135 |
| ENSP00000354739 | ENSP00000362306 |
| ENSP00000354739 | ENSP00000362334 |
| ENSP00000354739 | ENSP00000362744 |
| ENSP00000354739 | ENSP00000363018 |
| ENSP00000354739 | ENSP00000363676 |
| ENSP00000354739 | ENSP00000363944 |
| ENSP00000354739 | ENSP00000364320 |
| ENSP00000354739 | ENSP00000368565 |
| ENSP00000354739 | ENSP00000369757 |
| ENSP00000354739 | ENSP00000370589 |



|                 |                 |
|-----------------|-----------------|
| ENSP00000354739 | ENSP00000375730 |
| ENSP00000354739 | ENSP00000377486 |
| ENSP00000354739 | ENSP00000377640 |
| ENSP00000354739 | ENSP00000377865 |
| ENSP00000354739 | ENSP00000378160 |
| ENSP00000354739 | ENSP00000379607 |
| ENSP00000354739 | ENSP00000379888 |
| ENSP00000354739 | ENSP00000380156 |
| ENSP00000354739 | ENSP00000386717 |
| ENSP00000354739 | ENSP00000386992 |
| ENSP00000354739 | ENSP00000388330 |
| ENSP00000354739 | ENSP00000389103 |
| ENSP00000354739 | ENSP00000393393 |
| ENSP00000354739 | ENSP00000402338 |
| ENSP00000354739 | ENSP00000403536 |
| ENSP00000354739 | ENSP00000408058 |
| ENSP00000354739 | ENSP00000414321 |
| ENSP00000354742 | ENSP00000354876 |
| ENSP00000354742 | ENSP00000355890 |
| ENSP00000354742 | ENSP00000357998 |
| ENSP00000354742 | ENSP00000359531 |
| ENSP00000354742 | ENSP00000359688 |
| ENSP00000354742 | ENSP00000360532 |
| ENSP00000354742 | ENSP00000362171 |
| ENSP00000354742 | ENSP00000362352 |
| ENSP00000354742 | ENSP00000369042 |
| ENSP00000354742 | ENSP00000369335 |
| ENSP00000354742 | ENSP00000369411 |
| ENSP00000354742 | ENSP00000369757 |
| ENSP00000354742 | ENSP00000377655 |
| ENSP00000354742 | ENSP00000380460 |
| ENSP00000354742 | ENSP00000397435 |
| ENSP00000354742 | ENSP00000402527 |
| ENSP00000354742 | ENSP00000406490 |
| ENSP00000354772 | ENSP00000366565 |
| ENSP00000354775 | ENSP00000364847 |
| ENSP00000354775 | ENSP00000379457 |
| ENSP00000354775 | ENSP00000403852 |
| ENSP00000354782 | ENSP00000356346 |
| ENSP00000354782 | ENSP00000357013 |
| ENSP00000354782 | ENSP00000357025 |
| ENSP00000354782 | ENSP00000358490 |
| ENSP00000354782 | ENSP00000366843 |
| ENSP00000354782 | ENSP00000376445 |
| ENSP00000354782 | ENSP00000394049 |
| ENSP00000354791 | ENSP00000355560 |

|                 |                 |
|-----------------|-----------------|
| ENSP00000354791 | ENSP00000355596 |
| ENSP00000354791 | ENSP00000355922 |
| ENSP00000354791 | ENSP00000358081 |
| ENSP00000354791 | ENSP00000367766 |
| ENSP00000354791 | ENSP00000380690 |
| ENSP00000354791 | ENSP00000384015 |
| ENSP00000354791 | ENSP00000384573 |
| ENSP00000354791 | ENSP00000394316 |
| ENSP00000354791 | ENSP00000408910 |
| ENSP00000354791 | ENSP00000414906 |
| ENSP00000354794 | ENSP00000374443 |
| ENSP00000354812 | ENSP00000358563 |
| ENSP00000354812 | ENSP00000361076 |
| ENSP00000354812 | ENSP00000361982 |
| ENSP00000354812 | ENSP00000365837 |
| ENSP00000354813 | ENSP00000354961 |
| ENSP00000354813 | ENSP00000356972 |
| ENSP00000354848 | ENSP00000366843 |
| ENSP00000354850 | ENSP00000356520 |
| ENSP00000354850 | ENSP00000362824 |
| ENSP00000354850 | ENSP00000417763 |
| ENSP00000354851 | ENSP00000360532 |
| ENSP00000354851 | ENSP00000371734 |
| ENSP00000354851 | ENSP00000379607 |
| ENSP00000354876 | ENSP00000354982 |
| ENSP00000354876 | ENSP00000355963 |
| ENSP00000354876 | ENSP00000356329 |
| ENSP00000354876 | ENSP00000356438 |
| ENSP00000354876 | ENSP00000356587 |
| ENSP00000354876 | ENSP00000360782 |
| ENSP00000354876 | ENSP00000361042 |
| ENSP00000354876 | ENSP00000361207 |
| ENSP00000354876 | ENSP00000365766 |
| ENSP00000354876 | ENSP00000367934 |
| ENSP00000354876 | ENSP00000368790 |
| ENSP00000354876 | ENSP00000387262 |
| ENSP00000354883 | ENSP00000362334 |
| ENSP00000354883 | ENSP00000365131 |
| ENSP00000354883 | ENSP00000366682 |
| ENSP00000354883 | ENSP00000373331 |
| ENSP00000354883 | ENSP00000376758 |
| ENSP00000354883 | ENSP00000396937 |
| ENSP00000354883 | ENSP00000418734 |
| ENSP00000354911 | ENSP00000358997 |
| ENSP00000354911 | ENSP00000370410 |
| ENSP00000354911 | ENSP00000386394 |

|                 |                 |
|-----------------|-----------------|
| ENSP00000354916 | ENSP00000354927 |
| ENSP00000354916 | ENSP00000360621 |
| ENSP00000354916 | ENSP00000361465 |
| ENSP00000354916 | ENSP00000362578 |
| ENSP00000354916 | ENSP00000365005 |
| ENSP00000354916 | ENSP00000366974 |
| ENSP00000354916 | ENSP00000367029 |
| ENSP00000354916 | ENSP00000371475 |
| ENSP00000354916 | ENSP00000372023 |
| ENSP00000354916 | ENSP00000377655 |
| ENSP00000354916 | ENSP00000377793 |
| ENSP00000354916 | ENSP00000378529 |
| ENSP00000354916 | ENSP00000380054 |
| ENSP00000354916 | ENSP00000382423 |
| ENSP00000354916 | ENSP00000382562 |
| ENSP00000354916 | ENSP00000383503 |
| ENSP00000354916 | ENSP00000397636 |
| ENSP00000354916 | ENSP00000402527 |
| ENSP00000354916 | ENSP00000405636 |
| ENSP00000354916 | ENSP00000410530 |
| ENSP00000354916 | ENSP00000410954 |
| ENSP00000354916 | ENSP00000414110 |
| ENSP00000354916 | ENSP00000416599 |
| ENSP00000354919 | ENSP00000397435 |
| ENSP00000354927 | ENSP00000355866 |
| ENSP00000354927 | ENSP00000358335 |
| ENSP00000354927 | ENSP00000366121 |
| ENSP00000354927 | ENSP00000374455 |
| ENSP00000354927 | ENSP00000375986 |
| ENSP00000354927 | ENSP00000378306 |
| ENSP00000354927 | ENSP00000380450 |
| ENSP00000354927 | ENSP00000382562 |
| ENSP00000354927 | ENSP00000394071 |
| ENSP00000354951 | ENSP00000357047 |
| ENSP00000354951 | ENSP00000362993 |
| ENSP00000354951 | ENSP00000363193 |
| ENSP00000354951 | ENSP00000365439 |
| ENSP00000354951 | ENSP00000366135 |
| ENSP00000354951 | ENSP00000366843 |
| ENSP00000354951 | ENSP00000378350 |
| ENSP00000354951 | ENSP00000384474 |
| ENSP00000354951 | ENSP00000384573 |
| ENSP00000354951 | ENSP00000387170 |
| ENSP00000354957 | ENSP00000355077 |
| ENSP00000354957 | ENSP00000358019 |
| ENSP00000354957 | ENSP00000360286 |

|                 |                 |
|-----------------|-----------------|
| ENSP00000354957 | ENSP00000361310 |
| ENSP00000354957 | ENSP00000364293 |
| ENSP00000354957 | ENSP00000365588 |
| ENSP00000354957 | ENSP00000369335 |
| ENSP00000354957 | ENSP00000371155 |
| ENSP00000354957 | ENSP00000373060 |
| ENSP00000354957 | ENSP00000377665 |
| ENSP00000354957 | ENSP00000382562 |
| ENSP00000354957 | ENSP00000384048 |
| ENSP00000354957 | ENSP00000387347 |
| ENSP00000354957 | ENSP00000387429 |
| ENSP00000354957 | ENSP00000394791 |
| ENSP00000354957 | ENSP00000396484 |
| ENSP00000354957 | ENSP00000396704 |
| ENSP00000354957 | ENSP00000402527 |
| ENSP00000354957 | ENSP00000404318 |
| ENSP00000354957 | ENSP00000409167 |
| ENSP00000354957 | ENSP00000415212 |
| ENSP00000354957 | ENSP00000416511 |
| ENSP00000354961 | ENSP00000356972 |
| ENSP00000354961 | ENSP00000379282 |
| ENSP00000354972 | ENSP00000364813 |
| ENSP00000354972 | ENSP00000410758 |
| ENSP00000354972 | ENSP00000414006 |
| ENSP00000354972 | ENSP00000414634 |
| ENSP00000354972 | ENSP00000417763 |
| ENSP00000354977 | ENSP00000355013 |
| ENSP00000354977 | ENSP00000356405 |
| ENSP00000354977 | ENSP00000360116 |
| ENSP00000354977 | ENSP00000362334 |
| ENSP00000354977 | ENSP00000374280 |
| ENSP00000354977 | ENSP00000376445 |
| ENSP00000354977 | ENSP00000406293 |
| ENSP00000354982 | ENSP00000355572 |
| ENSP00000354982 | ENSP00000360782 |
| ENSP00000354982 | ENSP00000367934 |
| ENSP00000354995 | ENSP00000359321 |
| ENSP00000354995 | ENSP00000361057 |
| ENSP00000354995 | ENSP00000362900 |
| ENSP00000354995 | ENSP00000364839 |
| ENSP00000354995 | ENSP00000364895 |
| ENSP00000354995 | ENSP00000365877 |
| ENSP00000354995 | ENSP00000376204 |
| ENSP00000355001 | ENSP00000359531 |
| ENSP00000355001 | ENSP00000365747 |
| ENSP00000355001 | ENSP00000366413 |

|                 |                 |
|-----------------|-----------------|
| ENSP00000355010 | ENSP00000382269 |
| ENSP00000355011 | ENSP00000360532 |
| ENSP00000355011 | ENSP00000362936 |
| ENSP00000355011 | ENSP00000370589 |
| ENSP00000355011 | ENSP00000379607 |
| ENSP00000355011 | ENSP00000384490 |
| ENSP00000355011 | ENSP00000404121 |
| ENSP00000355013 | ENSP00000356405 |
| ENSP00000355013 | ENSP00000357887 |
| ENSP00000355013 | ENSP00000358497 |
| ENSP00000355013 | ENSP00000360515 |
| ENSP00000355013 | ENSP00000362334 |
| ENSP00000355013 | ENSP00000362900 |
| ENSP00000355013 | ENSP00000365025 |
| ENSP00000355013 | ENSP00000367029 |
| ENSP00000355013 | ENSP00000371546 |
| ENSP00000355013 | ENSP00000374213 |
| ENSP00000355013 | ENSP00000374280 |
| ENSP00000355013 | ENSP00000376097 |
| ENSP00000355013 | ENSP00000382177 |
| ENSP00000355013 | ENSP00000382492 |
| ENSP00000355013 | ENSP00000384048 |
| ENSP00000355013 | ENSP00000386759 |
| ENSP00000355026 | ENSP00000363763 |
| ENSP00000355026 | ENSP00000367878 |
| ENSP00000355026 | ENSP00000381045 |
| ENSP00000355028 | ENSP00000355231 |
| ENSP00000355028 | ENSP00000360116 |
| ENSP00000355028 | ENSP00000384573 |
| ENSP00000355028 | ENSP00000396068 |
| ENSP00000355050 | ENSP00000360532 |
| ENSP00000355050 | ENSP00000365439 |
| ENSP00000355050 | ENSP00000377262 |
| ENSP00000355050 | ENSP00000378517 |
| ENSP00000355050 | ENSP00000396301 |
| ENSP00000355051 | ENSP00000355759 |
| ENSP00000355051 | ENSP00000358854 |
| ENSP00000355051 | ENSP00000361998 |
| ENSP00000355051 | ENSP00000362068 |
| ENSP00000355051 | ENSP00000367406 |
| ENSP00000355051 | ENSP00000369695 |
| ENSP00000355077 | ENSP00000356448 |
| ENSP00000355077 | ENSP00000358019 |
| ENSP00000355077 | ENSP00000358478 |
| ENSP00000355077 | ENSP00000360310 |
| ENSP00000355077 | ENSP00000362413 |

|                 |                 |
|-----------------|-----------------|
| ENSP00000355077 | ENSP00000364270 |
| ENSP00000355077 | ENSP00000364289 |
| ENSP00000355077 | ENSP00000365588 |
| ENSP00000355077 | ENSP00000368438 |
| ENSP00000355077 | ENSP00000373060 |
| ENSP00000355077 | ENSP00000384048 |
| ENSP00000355077 | ENSP00000387429 |
| ENSP00000355077 | ENSP00000396484 |
| ENSP00000355077 | ENSP00000404318 |
| ENSP00000355077 | ENSP00000409167 |
| ENSP00000355077 | ENSP00000415212 |
| ENSP00000355077 | ENSP00000416511 |
| ENSP00000355086 | ENSP00000356405 |
| ENSP00000355086 | ENSP00000362576 |
| ENSP00000355086 | ENSP00000363779 |
| ENSP00000355086 | ENSP00000365837 |
| ENSP00000355090 | ENSP00000370719 |
| ENSP00000355136 | ENSP00000363559 |
| ENSP00000355136 | ENSP00000383623 |
| ENSP00000355146 | ENSP00000358301 |
| ENSP00000355146 | ENSP00000359321 |
| ENSP00000355153 | ENSP00000355536 |
| ENSP00000355153 | ENSP00000357051 |
| ENSP00000355153 | ENSP00000360532 |
| ENSP00000355153 | ENSP00000363676 |
| ENSP00000355153 | ENSP00000364929 |
| ENSP00000355153 | ENSP00000367263 |
| ENSP00000355153 | ENSP00000368438 |
| ENSP00000355153 | ENSP00000379607 |
| ENSP00000355153 | ENSP00000379933 |
| ENSP00000355153 | ENSP00000381932 |
| ENSP00000355153 | ENSP00000400312 |
| ENSP00000355153 | ENSP00000409016 |
| ENSP00000355153 | ENSP00000412566 |
| ENSP00000355153 | ENSP00000417281 |
| ENSP00000355155 | ENSP00000414187 |
| ENSP00000355167 | ENSP00000378288 |
| ENSP00000355167 | ENSP00000380523 |
| ENSP00000355167 | ENSP00000386959 |
| ENSP00000355167 | ENSP00000420270 |
| ENSP00000355177 | ENSP00000416097 |
| ENSP00000355185 | ENSP00000360116 |
| ENSP00000355185 | ENSP00000368438 |
| ENSP00000355185 | ENSP00000371475 |
| ENSP00000355185 | ENSP00000375809 |
| ENSP00000355205 | ENSP00000356405 |

|                 |                 |
|-----------------|-----------------|
| ENSP00000355205 | ENSP00000356989 |
| ENSP00000355205 | ENSP00000358423 |
| ENSP00000355205 | ENSP00000360515 |
| ENSP00000355205 | ENSP00000362592 |
| ENSP00000355205 | ENSP00000363313 |
| ENSP00000355205 | ENSP00000363734 |
| ENSP00000355205 | ENSP00000366974 |
| ENSP00000355205 | ENSP00000369335 |
| ENSP00000355205 | ENSP00000369695 |
| ENSP00000355205 | ENSP00000370611 |
| ENSP00000355205 | ENSP00000372694 |
| ENSP00000355205 | ENSP00000374213 |
| ENSP00000355205 | ENSP00000374280 |
| ENSP00000355205 | ENSP00000376204 |
| ENSP00000355205 | ENSP00000380460 |
| ENSP00000355205 | ENSP00000380504 |
| ENSP00000355205 | ENSP00000382688 |
| ENSP00000355205 | ENSP00000384198 |
| ENSP00000355205 | ENSP00000386759 |
| ENSP00000355205 | ENSP00000391457 |
| ENSP00000355205 | ENSP00000400476 |
| ENSP00000355205 | ENSP00000412319 |
| ENSP00000355205 | ENSP00000415678 |
| ENSP00000355206 | ENSP00000379282 |
| ENSP00000355231 | ENSP00000356146 |
| ENSP00000355231 | ENSP00000357484 |
| ENSP00000355231 | ENSP00000358022 |
| ENSP00000355231 | ENSP00000361640 |
| ENSP00000355231 | ENSP00000363055 |
| ENSP00000355231 | ENSP00000363349 |
| ENSP00000355231 | ENSP00000363591 |
| ENSP00000355231 | ENSP00000367265 |
| ENSP00000355231 | ENSP00000370557 |
| ENSP00000355231 | ENSP00000372023 |
| ENSP00000355231 | ENSP00000374558 |
| ENSP00000355231 | ENSP00000381293 |
| ENSP00000355231 | ENSP00000382779 |
| ENSP00000355231 | ENSP00000384651 |
| ENSP00000355231 | ENSP00000395538 |
| ENSP00000355231 | ENSP00000397441 |
| ENSP00000355231 | ENSP00000402240 |
| ENSP00000355231 | ENSP00000404923 |
| ENSP00000355231 | ENSP00000406888 |
| ENSP00000355261 | ENSP00000358563 |
| ENSP00000355261 | ENSP00000361577 |
| ENSP00000355261 | ENSP00000380504 |

|                 |                 |
|-----------------|-----------------|
| ENSP00000355261 | ENSP00000402515 |
| ENSP00000355261 | ENSP00000412566 |
| ENSP00000355296 | ENSP00000357907 |
| ENSP00000355296 | ENSP00000361467 |
| ENSP00000355296 | ENSP00000362441 |
| ENSP00000355296 | ENSP00000367069 |
| ENSP00000355296 | ENSP00000367440 |
| ENSP00000355296 | ENSP00000374455 |
| ENSP00000355296 | ENSP00000383623 |
| ENSP00000355296 | ENSP00000386520 |
| ENSP00000355296 | ENSP00000418748 |
| ENSP00000355308 | ENSP00000368959 |
| ENSP00000355317 | ENSP00000357047 |
| ENSP00000355317 | ENSP00000384109 |
| ENSP00000355338 | ENSP00000397441 |
| ENSP00000355361 | ENSP00000355751 |
| ENSP00000355370 | ENSP00000357470 |
| ENSP00000355370 | ENSP00000379908 |
| ENSP00000355388 | ENSP00000360621 |
| ENSP00000355388 | ENSP00000362306 |
| ENSP00000355388 | ENSP00000366271 |
| ENSP00000355388 | ENSP00000368349 |
| ENSP00000355388 | ENSP00000372689 |
| ENSP00000355388 | ENSP00000417980 |
| ENSP00000355398 | ENSP00000355923 |
| ENSP00000355398 | ENSP00000382064 |
| ENSP00000355470 | ENSP00000381031 |
| ENSP00000355471 | ENSP00000355541 |
| ENSP00000355471 | ENSP00000356548 |
| ENSP00000355471 | ENSP00000360031 |
| ENSP00000355471 | ENSP00000362036 |
| ENSP00000355471 | ENSP00000363746 |
| ENSP00000355471 | ENSP00000364320 |
| ENSP00000355471 | ENSP00000370968 |
| ENSP00000355471 | ENSP00000372695 |
| ENSP00000355471 | ENSP00000377954 |
| ENSP00000355471 | ENSP00000379339 |
| ENSP00000355471 | ENSP00000393241 |
| ENSP00000355471 | ENSP00000399454 |
| ENSP00000355471 | ENSP00000402869 |
| ENSP00000355471 | ENSP00000403175 |
| ENSP00000355471 | ENSP00000405614 |
| ENSP00000355471 | ENSP00000412583 |
| ENSP00000355471 | ENSP00000416110 |
| ENSP00000355471 | ENSP00000420588 |
| ENSP00000355471 | ENSP00000420714 |



|                 |                 |
|-----------------|-----------------|
| ENSP00000355512 | ENSP00000361141 |
| ENSP00000355512 | ENSP00000365147 |
| ENSP00000355517 | ENSP00000355890 |
| ENSP00000355517 | ENSP00000360327 |
| ENSP00000355517 | ENSP00000360918 |
| ENSP00000355517 | ENSP00000401508 |
| ENSP00000355518 | ENSP00000363559 |
| ENSP00000355518 | ENSP00000364699 |
| ENSP00000355518 | ENSP00000377527 |
| ENSP00000355518 | ENSP00000382595 |
| ENSP00000355518 | ENSP00000418661 |
| ENSP00000355536 | ENSP00000397435 |
| ENSP00000355541 | ENSP00000356134 |
| ENSP00000355541 | ENSP00000356520 |
| ENSP00000355541 | ENSP00000358812 |
| ENSP00000355541 | ENSP00000359688 |
| ENSP00000355541 | ENSP00000359939 |
| ENSP00000355541 | ENSP00000360031 |
| ENSP00000355541 | ENSP00000361076 |
| ENSP00000355541 | ENSP00000363642 |
| ENSP00000355541 | ENSP00000363746 |
| ENSP00000355541 | ENSP00000364847 |
| ENSP00000355541 | ENSP00000366557 |
| ENSP00000355541 | ENSP00000368984 |
| ENSP00000355541 | ENSP00000370589 |
| ENSP00000355541 | ENSP00000370968 |
| ENSP00000355541 | ENSP00000371169 |
| ENSP00000355541 | ENSP00000372695 |
| ENSP00000355541 | ENSP00000384302 |
| ENSP00000355541 | ENSP00000387303 |
| ENSP00000355541 | ENSP00000392601 |
| ENSP00000355541 | ENSP00000398597 |
| ENSP00000355541 | ENSP00000399454 |
| ENSP00000355541 | ENSP00000402869 |
| ENSP00000355541 | ENSP00000405614 |
| ENSP00000355560 | ENSP00000355922 |
| ENSP00000355560 | ENSP00000356319 |
| ENSP00000355560 | ENSP00000356579 |
| ENSP00000355560 | ENSP00000356989 |
| ENSP00000355560 | ENSP00000357651 |
| ENSP00000355560 | ENSP00000357887 |
| ENSP00000355560 | ENSP00000360473 |
| ENSP00000355560 | ENSP00000362334 |
| ENSP00000355560 | ENSP00000369411 |
| ENSP00000355560 | ENSP00000369736 |
| ENSP00000355560 | ENSP00000370151 |

|                 |                 |
|-----------------|-----------------|
| ENSP00000355560 | ENSP00000382562 |
| ENSP00000355572 | ENSP00000365243 |
| ENSP00000355572 | ENSP00000367934 |
| ENSP00000355572 | ENSP00000387262 |
| ENSP00000355580 | ENSP00000394791 |
| ENSP00000355596 | ENSP00000359425 |
| ENSP00000355596 | ENSP00000360532 |
| ENSP00000355596 | ENSP00000361392 |
| ENSP00000355596 | ENSP00000361824 |
| ENSP00000355596 | ENSP00000362413 |
| ENSP00000355596 | ENSP00000362424 |
| ENSP00000355596 | ENSP00000362751 |
| ENSP00000355596 | ENSP00000366557 |
| ENSP00000355596 | ENSP00000367721 |
| ENSP00000355596 | ENSP00000370719 |
| ENSP00000355596 | ENSP00000373301 |
| ENSP00000355596 | ENSP00000383402 |
| ENSP00000355596 | ENSP00000387262 |
| ENSP00000355596 | ENSP00000388137 |
| ENSP00000355596 | ENSP00000396103 |
| ENSP00000355596 | ENSP00000399511 |
| ENSP00000355596 | ENSP00000408910 |
| ENSP00000355599 | ENSP00000357448 |
| ENSP00000355599 | ENSP00000367265 |
| ENSP00000355599 | ENSP00000373485 |
| ENSP00000355599 | ENSP00000384015 |
| ENSP00000355601 | ENSP00000356476 |
| ENSP00000355627 | ENSP00000356094 |
| ENSP00000355627 | ENSP00000358106 |
| ENSP00000355627 | ENSP00000381031 |
| ENSP00000355629 | ENSP00000362105 |
| ENSP00000355629 | ENSP00000386156 |
| ENSP00000355629 | ENSP00000397441 |
| ENSP00000355720 | ENSP00000369695 |
| ENSP00000355721 | ENSP00000360183 |
| ENSP00000355721 | ENSP00000369409 |
| ENSP00000355721 | ENSP00000389934 |
| ENSP00000355721 | ENSP00000390783 |
| ENSP00000355721 | ENSP00000417748 |
| ENSP00000355736 | ENSP00000365025 |
| ENSP00000355736 | ENSP00000367841 |
| ENSP00000355736 | ENSP00000379607 |
| ENSP00000355739 | ENSP00000358033 |
| ENSP00000355739 | ENSP00000358997 |
| ENSP00000355739 | ENSP00000359385 |
| ENSP00000355739 | ENSP00000364847 |

|                 |                 |
|-----------------|-----------------|
| ENSP00000355739 | ENSP00000365388 |
| ENSP00000355751 | ENSP00000361405 |
| ENSP00000355759 | ENSP00000357047 |
| ENSP00000355759 | ENSP00000357907 |
| ENSP00000355759 | ENSP00000358404 |
| ENSP00000355759 | ENSP00000360532 |
| ENSP00000355759 | ENSP00000363021 |
| ENSP00000355759 | ENSP00000367034 |
| ENSP00000355759 | ENSP00000367787 |
| ENSP00000355759 | ENSP00000368349 |
| ENSP00000355759 | ENSP00000368438 |
| ENSP00000355759 | ENSP00000369075 |
| ENSP00000355759 | ENSP00000369411 |
| ENSP00000355759 | ENSP00000369757 |
| ENSP00000355759 | ENSP00000370151 |
| ENSP00000355759 | ENSP00000376309 |
| ENSP00000355759 | ENSP00000377969 |
| ENSP00000355759 | ENSP00000378503 |
| ENSP00000355759 | ENSP00000379607 |
| ENSP00000355759 | ENSP00000384408 |
| ENSP00000355759 | ENSP00000392028 |
| ENSP00000355759 | ENSP00000394791 |
| ENSP00000355759 | ENSP00000396704 |
| ENSP00000355759 | ENSP00000400806 |
| ENSP00000355759 | ENSP00000414187 |
| ENSP00000355759 | ENSP00000420588 |
| ENSP00000355777 | ENSP00000374455 |
| ENSP00000355809 | ENSP00000360532 |
| ENSP00000355809 | ENSP00000362399 |
| ENSP00000355809 | ENSP00000365891 |
| ENSP00000355809 | ENSP00000374328 |
| ENSP00000355809 | ENSP00000400223 |
| ENSP00000355812 | ENSP00000356579 |
| ENSP00000355812 | ENSP00000363559 |
| ENSP00000355812 | ENSP00000370150 |
| ENSP00000355827 | ENSP00000368226 |
| ENSP00000355840 | ENSP00000361048 |
| ENSP00000355865 | ENSP00000360798 |
| ENSP00000355865 | ENSP00000364204 |
| ENSP00000355865 | ENSP00000366843 |
| ENSP00000355865 | ENSP00000367408 |
| ENSP00000355865 | ENSP00000374455 |
| ENSP00000355866 | ENSP00000358404 |
| ENSP00000355866 | ENSP00000363680 |
| ENSP00000355866 | ENSP00000364320 |
| ENSP00000355866 | ENSP00000365439 |

|                 |                 |
|-----------------|-----------------|
| ENSP00000355877 | ENSP00000356972 |
| ENSP00000355884 | ENSP00000357907 |
| ENSP00000355884 | ENSP00000378529 |
| ENSP00000355884 | ENSP00000391249 |
| ENSP00000355884 | ENSP00000403817 |
| ENSP00000355890 | ENSP00000355963 |
| ENSP00000355890 | ENSP00000356579 |
| ENSP00000355890 | ENSP00000356903 |
| ENSP00000355890 | ENSP00000357998 |
| ENSP00000355890 | ENSP00000358042 |
| ENSP00000355890 | ENSP00000359000 |
| ENSP00000355890 | ENSP00000359691 |
| ENSP00000355890 | ENSP00000360268 |
| ENSP00000355890 | ENSP00000360286 |
| ENSP00000355890 | ENSP00000360327 |
| ENSP00000355890 | ENSP00000361064 |
| ENSP00000355890 | ENSP00000361287 |
| ENSP00000355890 | ENSP00000362576 |
| ENSP00000355890 | ENSP00000363205 |
| ENSP00000355890 | ENSP00000364035 |
| ENSP00000355890 | ENSP00000364794 |
| ENSP00000355890 | ENSP00000364815 |
| ENSP00000355890 | ENSP00000367079 |
| ENSP00000355890 | ENSP00000368438 |
| ENSP00000355890 | ENSP00000369038 |
| ENSP00000355890 | ENSP00000369042 |
| ENSP00000355890 | ENSP00000369335 |
| ENSP00000355890 | ENSP00000370883 |
| ENSP00000355890 | ENSP00000373331 |
| ENSP00000355890 | ENSP00000376946 |
| ENSP00000355890 | ENSP00000377527 |
| ENSP00000355890 | ENSP00000377914 |
| ENSP00000355890 | ENSP00000377954 |
| ENSP00000355890 | ENSP00000379607 |
| ENSP00000355890 | ENSP00000381293 |
| ENSP00000355890 | ENSP00000386621 |
| ENSP00000355890 | ENSP00000389934 |
| ENSP00000355890 | ENSP00000401121 |
| ENSP00000355890 | ENSP00000402338 |
| ENSP00000355890 | ENSP00000403359 |
| ENSP00000355890 | ENSP00000415316 |
| ENSP00000355890 | ENSP00000417963 |
| ENSP00000355896 | ENSP00000362299 |
| ENSP00000355896 | ENSP00000414187 |
| ENSP00000355899 | ENSP00000357048 |
| ENSP00000355899 | ENSP00000359345 |

|                 |                 |
|-----------------|-----------------|
| ENSP00000355899 | ENSP00000359688 |
| ENSP00000355899 | ENSP00000361076 |
| ENSP00000355899 | ENSP00000363559 |
| ENSP00000355899 | ENSP00000368887 |
| ENSP00000355899 | ENSP00000370589 |
| ENSP00000355899 | ENSP00000379607 |
| ENSP00000355899 | ENSP00000380982 |
| ENSP00000355899 | ENSP00000402338 |
| ENSP00000355922 | ENSP00000356989 |
| ENSP00000355922 | ENSP00000358854 |
| ENSP00000355922 | ENSP00000360310 |
| ENSP00000355922 | ENSP00000362656 |
| ENSP00000355922 | ENSP00000368976 |
| ENSP00000355922 | ENSP00000369871 |
| ENSP00000355922 | ENSP00000373700 |
| ENSP00000355922 | ENSP00000374566 |
| ENSP00000355922 | ENSP00000377793 |
| ENSP00000355922 | ENSP00000379607 |
| ENSP00000355922 | ENSP00000381657 |
| ENSP00000355922 | ENSP00000382562 |
| ENSP00000355922 | ENSP00000397435 |
| ENSP00000355922 | ENSP00000402084 |
| ENSP00000355923 | ENSP00000368646 |
| ENSP00000355923 | ENSP00000379933 |
| ENSP00000355923 | ENSP00000394794 |
| ENSP00000355941 | ENSP00000368984 |
| ENSP00000355941 | ENSP00000396704 |
| ENSP00000355944 | ENSP00000360532 |
| ENSP00000355944 | ENSP00000363055 |
| ENSP00000355944 | ENSP00000370557 |
| ENSP00000355958 | ENSP00000365048 |
| ENSP00000355958 | ENSP00000366271 |
| ENSP00000355958 | ENSP00000368438 |
| ENSP00000355958 | ENSP00000370151 |
| ENSP00000355958 | ENSP00000372023 |
| ENSP00000355958 | ENSP00000376946 |
| ENSP00000355958 | ENSP00000384109 |
| ENSP00000355958 | ENSP00000417281 |
| ENSP00000355961 | ENSP00000381064 |
| ENSP00000355961 | ENSP00000385722 |
| ENSP00000355963 | ENSP00000357998 |
| ENSP00000355963 | ENSP00000359067 |
| ENSP00000355968 | ENSP00000358423 |
| ENSP00000355968 | ENSP00000361057 |
| ENSP00000355968 | ENSP00000366030 |
| ENSP00000355968 | ENSP00000370377 |

|                 |                 |
|-----------------|-----------------|
| ENSP00000355968 | ENSP00000372700 |
| ENSP00000355968 | ENSP00000385083 |
| ENSP00000355968 | ENSP00000391735 |
| ENSP00000355968 | ENSP00000414145 |
| ENSP00000356001 | ENSP00000370930 |
| ENSP00000356094 | ENSP00000369647 |
| ENSP00000356104 | ENSP00000356811 |
| ENSP00000356104 | ENSP00000358081 |
| ENSP00000356104 | ENSP00000366249 |
| ENSP00000356104 | ENSP00000368699 |
| ENSP00000356104 | ENSP00000373039 |
| ENSP00000356104 | ENSP00000379228 |
| ENSP00000356104 | ENSP00000379500 |
| ENSP00000356104 | ENSP00000396152 |
| ENSP00000356104 | ENSP00000410416 |
| ENSP00000356130 | ENSP00000358737 |
| ENSP00000356134 | ENSP00000360031 |
| ENSP00000356134 | ENSP00000362036 |
| ENSP00000356134 | ENSP00000363746 |
| ENSP00000356134 | ENSP00000364320 |
| ENSP00000356134 | ENSP00000370968 |
| ENSP00000356134 | ENSP00000372695 |
| ENSP00000356134 | ENSP00000377954 |
| ENSP00000356134 | ENSP00000379339 |
| ENSP00000356134 | ENSP00000393241 |
| ENSP00000356134 | ENSP00000399454 |
| ENSP00000356134 | ENSP00000402869 |
| ENSP00000356134 | ENSP00000403175 |
| ENSP00000356134 | ENSP00000405614 |
| ENSP00000356134 | ENSP00000412583 |
| ENSP00000356134 | ENSP00000416110 |
| ENSP00000356134 | ENSP00000420588 |
| ENSP00000356134 | ENSP00000420714 |
| ENSP00000356146 | ENSP00000356405 |
| ENSP00000356146 | ENSP00000357880 |
| ENSP00000356146 | ENSP00000359939 |
| ENSP00000356146 | ENSP00000360270 |
| ENSP00000356146 | ENSP00000360327 |
| ENSP00000356146 | ENSP00000360532 |
| ENSP00000356146 | ENSP00000360817 |
| ENSP00000356146 | ENSP00000361433 |
| ENSP00000356146 | ENSP00000361465 |
| ENSP00000356146 | ENSP00000361845 |
| ENSP00000356146 | ENSP00000362900 |
| ENSP00000356146 | ENSP00000363397 |
| ENSP00000356146 | ENSP00000364289 |

|                 |                 |
|-----------------|-----------------|
| ENSP00000356146 | ENSP00000364929 |
| ENSP00000356146 | ENSP00000366135 |
| ENSP00000356146 | ENSP00000368824 |
| ENSP00000356146 | ENSP00000368984 |
| ENSP00000356146 | ENSP00000371236 |
| ENSP00000356146 | ENSP00000372697 |
| ENSP00000356146 | ENSP00000374280 |
| ENSP00000356146 | ENSP00000389934 |
| ENSP00000356146 | ENSP00000390831 |
| ENSP00000356146 | ENSP00000391197 |
| ENSP00000356146 | ENSP00000397441 |
| ENSP00000356146 | ENSP00000402240 |
| ENSP00000356146 | ENSP00000403852 |
| ENSP00000356146 | ENSP00000404016 |
| ENSP00000356146 | ENSP00000406988 |
| ENSP00000356146 | ENSP00000409952 |
| ENSP00000356146 | ENSP00000419851 |
| ENSP00000356162 | ENSP00000361405 |
| ENSP00000356186 | ENSP00000364898 |
| ENSP00000356231 | ENSP00000367923 |
| ENSP00000356231 | ENSP00000369519 |
| ENSP00000356231 | ENSP00000376871 |
| ENSP00000356231 | ENSP00000394071 |
| ENSP00000356247 | ENSP00000365811 |
| ENSP00000356263 | ENSP00000362936 |
| ENSP00000356263 | ENSP00000363162 |
| ENSP00000356272 | ENSP00000384015 |
| ENSP00000356272 | ENSP00000386456 |
| ENSP00000356272 | ENSP00000392330 |
| ENSP00000356290 | ENSP00000359345 |
| ENSP00000356290 | ENSP00000362153 |
| ENSP00000356290 | ENSP00000364320 |
| ENSP00000356290 | ENSP00000364847 |
| ENSP00000356290 | ENSP00000365806 |
| ENSP00000356290 | ENSP00000366519 |
| ENSP00000356290 | ENSP00000367637 |
| ENSP00000356290 | ENSP00000368565 |
| ENSP00000356290 | ENSP00000373090 |
| ENSP00000356290 | ENSP00000373404 |
| ENSP00000356290 | ENSP00000377617 |
| ENSP00000356290 | ENSP00000382392 |
| ENSP00000356290 | ENSP00000394290 |
| ENSP00000356290 | ENSP00000403576 |
| ENSP00000356290 | ENSP00000409074 |
| ENSP00000356290 | ENSP00000409367 |
| ENSP00000356290 | ENSP00000411162 |

|                 |                 |
|-----------------|-----------------|
| ENSP00000356290 | ENSP00000417763 |
| ENSP00000356290 | ENSP00000419740 |
| ENSP00000356319 | ENSP00000360922 |
| ENSP00000356329 | ENSP00000361686 |
| ENSP00000356329 | ENSP00000368140 |
| ENSP00000356331 | ENSP00000356795 |
| ENSP00000356331 | ENSP00000357494 |
| ENSP00000356331 | ENSP00000368253 |
| ENSP00000356331 | ENSP00000382688 |
| ENSP00000356331 | ENSP00000399968 |
| ENSP00000356331 | ENSP00000404121 |
| ENSP00000356331 | ENSP00000418210 |
| ENSP00000356346 | ENSP00000358490 |
| ENSP00000356346 | ENSP00000360916 |
| ENSP00000356346 | ENSP00000361554 |
| ENSP00000356346 | ENSP00000365891 |
| ENSP00000356346 | ENSP00000371341 |
| ENSP00000356346 | ENSP00000376544 |
| ENSP00000356346 | ENSP00000381293 |
| ENSP00000356346 | ENSP00000384675 |
| ENSP00000356379 | ENSP00000363559 |
| ENSP00000356379 | ENSP00000404923 |
| ENSP00000356405 | ENSP00000356548 |
| ENSP00000356405 | ENSP00000356641 |
| ENSP00000356405 | ENSP00000357442 |
| ENSP00000356405 | ENSP00000357602 |
| ENSP00000356405 | ENSP00000357887 |
| ENSP00000356405 | ENSP00000357907 |
| ENSP00000356405 | ENSP00000358064 |
| ENSP00000356405 | ENSP00000358478 |
| ENSP00000356405 | ENSP00000359531 |
| ENSP00000356405 | ENSP00000359818 |
| ENSP00000356405 | ENSP00000360515 |
| ENSP00000356405 | ENSP00000360532 |
| ENSP00000356405 | ENSP00000360621 |
| ENSP00000356405 | ENSP00000361642 |
| ENSP00000356405 | ENSP00000362344 |
| ENSP00000356405 | ENSP00000362352 |
| ENSP00000356405 | ENSP00000362532 |
| ENSP00000356405 | ENSP00000363779 |
| ENSP00000356405 | ENSP00000364289 |
| ENSP00000356405 | ENSP00000364699 |
| ENSP00000356405 | ENSP00000364929 |
| ENSP00000356405 | ENSP00000365025 |
| ENSP00000356405 | ENSP00000365877 |
| ENSP00000356405 | ENSP00000366135 |



|                 |                 |
|-----------------|-----------------|
| ENSP00000356405 | ENSP00000366974 |
| ENSP00000356405 | ENSP00000367498 |
| ENSP00000356405 | ENSP00000370741 |
| ENSP00000356405 | ENSP00000374213 |
| ENSP00000356405 | ENSP00000374280 |
| ENSP00000356405 | ENSP00000374529 |
| ENSP00000356405 | ENSP00000376097 |
| ENSP00000356405 | ENSP00000379217 |
| ENSP00000356405 | ENSP00000380460 |
| ENSP00000356405 | ENSP00000381657 |
| ENSP00000356405 | ENSP00000386759 |
| ENSP00000356405 | ENSP00000390475 |
| ENSP00000356405 | ENSP00000391723 |
| ENSP00000356405 | ENSP00000394382 |
| ENSP00000356405 | ENSP00000402240 |
| ENSP00000356405 | ENSP00000412922 |
| ENSP00000356410 | ENSP00000368646 |
| ENSP00000356410 | ENSP00000373477 |
| ENSP00000356438 | ENSP00000379282 |
| ENSP00000356448 | ENSP00000356470 |
| ENSP00000356448 | ENSP00000357113 |
| ENSP00000356448 | ENSP00000360286 |
| ENSP00000356448 | ENSP00000360532 |
| ENSP00000356448 | ENSP00000362900 |
| ENSP00000356448 | ENSP00000366135 |
| ENSP00000356448 | ENSP00000367835 |
| ENSP00000356448 | ENSP00000372023 |
| ENSP00000356448 | ENSP00000374467 |
| ENSP00000356448 | ENSP00000375986 |
| ENSP00000356448 | ENSP00000379607 |
| ENSP00000356448 | ENSP00000380982 |
| ENSP00000356448 | ENSP00000382562 |
| ENSP00000356448 | ENSP00000382779 |
| ENSP00000356448 | ENSP00000383145 |
| ENSP00000356448 | ENSP00000392330 |
| ENSP00000356448 | ENSP00000394791 |
| ENSP00000356448 | ENSP00000402515 |
| ENSP00000356470 | ENSP00000358033 |
| ENSP00000356470 | ENSP00000362900 |
| ENSP00000356470 | ENSP00000363745 |
| ENSP00000356470 | ENSP00000365388 |
| ENSP00000356470 | ENSP00000368439 |
| ENSP00000356470 | ENSP00000371888 |
| ENSP00000356476 | ENSP00000358563 |
| ENSP00000356476 | ENSP00000360532 |
| ENSP00000356476 | ENSP00000361982 |

|                 |                 |
|-----------------|-----------------|
| ENSP00000356476 | ENSP00000365837 |
| ENSP00000356476 | ENSP00000370741 |
| ENSP00000356476 | ENSP00000381657 |
| ENSP00000356476 | ENSP00000382779 |
| ENSP00000356476 | ENSP00000386134 |
| ENSP00000356476 | ENSP00000406490 |
| ENSP00000356489 | ENSP00000364320 |
| ENSP00000356489 | ENSP00000387219 |
| ENSP00000356520 | ENSP00000357440 |
| ENSP00000356520 | ENSP00000358497 |
| ENSP00000356520 | ENSP00000358563 |
| ENSP00000356520 | ENSP00000358716 |
| ENSP00000356520 | ENSP00000358812 |
| ENSP00000356520 | ENSP00000359531 |
| ENSP00000356520 | ENSP00000360031 |
| ENSP00000356520 | ENSP00000360532 |
| ENSP00000356520 | ENSP00000360922 |
| ENSP00000356520 | ENSP00000362110 |
| ENSP00000356520 | ENSP00000364289 |
| ENSP00000356520 | ENSP00000365439 |
| ENSP00000356520 | ENSP00000367835 |
| ENSP00000356520 | ENSP00000368438 |
| ENSP00000356520 | ENSP00000370083 |
| ENSP00000356520 | ENSP00000370119 |
| ENSP00000356520 | ENSP00000370589 |
| ENSP00000356520 | ENSP00000379607 |
| ENSP00000356520 | ENSP00000381031 |
| ENSP00000356520 | ENSP00000393953 |
| ENSP00000356520 | ENSP00000404121 |
| ENSP00000356520 | ENSP00000412566 |
| ENSP00000356530 | ENSP00000356562 |
| ENSP00000356530 | ENSP00000357998 |
| ENSP00000356530 | ENSP00000360149 |
| ENSP00000356530 | ENSP00000361057 |
| ENSP00000356530 | ENSP00000361845 |
| ENSP00000356530 | ENSP00000366225 |
| ENSP00000356530 | ENSP00000373702 |
| ENSP00000356530 | ENSP00000380793 |
| ENSP00000356530 | ENSP00000386918 |
| ENSP00000356530 | ENSP00000415203 |
| ENSP00000356541 | ENSP00000379607 |
| ENSP00000356548 | ENSP00000360473 |
| ENSP00000356548 | ENSP00000364293 |
| ENSP00000356548 | ENSP00000364320 |
| ENSP00000356548 | ENSP00000365830 |
| ENSP00000356548 | ENSP00000367029 |

|                 |                 |
|-----------------|-----------------|
| ENSP00000356548 | ENSP00000369042 |
| ENSP00000356548 | ENSP00000370589 |
| ENSP00000356548 | ENSP00000374390 |
| ENSP00000356548 | ENSP00000377040 |
| ENSP00000356548 | ENSP00000379888 |
| ENSP00000356548 | ENSP00000380982 |
| ENSP00000356548 | ENSP00000382779 |
| ENSP00000356548 | ENSP00000384490 |
| ENSP00000356548 | ENSP00000388920 |
| ENSP00000356548 | ENSP00000417229 |
| ENSP00000356548 | ENSP00000419740 |
| ENSP00000356548 | ENSP00000420357 |
| ENSP00000356562 | ENSP00000393596 |
| ENSP00000356562 | ENSP00000397441 |
| ENSP00000356562 | ENSP00000401445 |
| ENSP00000356562 | ENSP00000402240 |
| ENSP00000356563 | ENSP00000357051 |
| ENSP00000356563 | ENSP00000358312 |
| ENSP00000356563 | ENSP00000360412 |
| ENSP00000356563 | ENSP00000382177 |
| ENSP00000356563 | ENSP00000400312 |
| ENSP00000356563 | ENSP00000407401 |
| ENSP00000356574 | ENSP00000361186 |
| ENSP00000356579 | ENSP00000358283 |
| ENSP00000356579 | ENSP00000358994 |
| ENSP00000356579 | ENSP00000360065 |
| ENSP00000356579 | ENSP00000360473 |
| ENSP00000356579 | ENSP00000361800 |
| ENSP00000356579 | ENSP00000374566 |
| ENSP00000356579 | ENSP00000377793 |
| ENSP00000356579 | ENSP00000382177 |
| ENSP00000356579 | ENSP00000384290 |
| ENSP00000356579 | ENSP00000384490 |
| ENSP00000356579 | ENSP00000400806 |
| ENSP00000356579 | ENSP00000408910 |
| ENSP00000356579 | ENSP00000414906 |
| ENSP00000356587 | ENSP00000358033 |
| ENSP00000356587 | ENSP00000361686 |
| ENSP00000356587 | ENSP00000368190 |
| ENSP00000356587 | ENSP00000368438 |
| ENSP00000356587 | ENSP00000380921 |
| ENSP00000356591 | ENSP00000360918 |
| ENSP00000356595 | ENSP00000358242 |
| ENSP00000356595 | ENSP00000363763 |
| ENSP00000356595 | ENSP00000374328 |
| ENSP00000356595 | ENSP00000386165 |

|                 |                 |
|-----------------|-----------------|
| ENSP00000356595 | ENSP00000409346 |
| ENSP00000356602 | ENSP00000366746 |
| ENSP00000356602 | ENSP00000374443 |
| ENSP00000356623 | ENSP00000362717 |
| ENSP00000356623 | ENSP00000377265 |
| ENSP00000356641 | ENSP00000357907 |
| ENSP00000356641 | ENSP00000360473 |
| ENSP00000356641 | ENSP00000384109 |
| ENSP00000356641 | ENSP00000386759 |
| ENSP00000356641 | ENSP00000396937 |
| ENSP00000356641 | ENSP00000408994 |
| ENSP00000356641 | ENSP00000417281 |
| ENSP00000356652 | ENSP00000379607 |
| ENSP00000356655 | ENSP00000417748 |
| ENSP00000356694 | ENSP00000360916 |
| ENSP00000356694 | ENSP00000373347 |
| ENSP00000356694 | ENSP00000394794 |
| ENSP00000356694 | ENSP00000396876 |
| ENSP00000356694 | ENSP00000413625 |
| ENSP00000356737 | ENSP00000417281 |
| ENSP00000356744 | ENSP00000357048 |
| ENSP00000356744 | ENSP00000362171 |
| ENSP00000356744 | ENSP00000362576 |
| ENSP00000356744 | ENSP00000371155 |
| ENSP00000356774 | ENSP00000357907 |
| ENSP00000356774 | ENSP00000360473 |
| ENSP00000356774 | ENSP00000376827 |
| ENSP00000356774 | ENSP00000386759 |
| ENSP00000356774 | ENSP00000396937 |
| ENSP00000356785 | ENSP00000357842 |
| ENSP00000356785 | ENSP00000369456 |
| ENSP00000356785 | ENSP00000369757 |
| ENSP00000356795 | ENSP00000392617 |
| ENSP00000356807 | ENSP00000362546 |
| ENSP00000356807 | ENSP00000364699 |
| ENSP00000356807 | ENSP00000379093 |
| ENSP00000356807 | ENSP00000396937 |
| ENSP00000356811 | ENSP00000359939 |
| ENSP00000356811 | ENSP00000360532 |
| ENSP00000356811 | ENSP00000361433 |
| ENSP00000356811 | ENSP00000362900 |
| ENSP00000356811 | ENSP00000363308 |
| ENSP00000356811 | ENSP00000363779 |
| ENSP00000356811 | ENSP00000364320 |
| ENSP00000356811 | ENSP00000364543 |
| ENSP00000356811 | ENSP00000365811 |

|                 |                 |
|-----------------|-----------------|
| ENSP00000356811 | ENSP00000366135 |
| ENSP00000356811 | ENSP00000366746 |
| ENSP00000356811 | ENSP00000366953 |
| ENSP00000356811 | ENSP00000368984 |
| ENSP00000356811 | ENSP00000369162 |
| ENSP00000356811 | ENSP00000369757 |
| ENSP00000356811 | ENSP00000369897 |
| ENSP00000356811 | ENSP00000372326 |
| ENSP00000356811 | ENSP00000372827 |
| ENSP00000356811 | ENSP00000373715 |
| ENSP00000356811 | ENSP00000377954 |
| ENSP00000356811 | ENSP00000391944 |
| ENSP00000356811 | ENSP00000394400 |
| ENSP00000356811 | ENSP00000398597 |
| ENSP00000356811 | ENSP00000399530 |
| ENSP00000356811 | ENSP00000400626 |
| ENSP00000356811 | ENSP00000412310 |
| ENSP00000356817 | ENSP00000384109 |
| ENSP00000356825 | ENSP00000357917 |
| ENSP00000356825 | ENSP00000367208 |
| ENSP00000356848 | ENSP00000360515 |
| ENSP00000356859 | ENSP00000364709 |
| ENSP00000356903 | ENSP00000367059 |
| ENSP00000356903 | ENSP00000368119 |
| ENSP00000356903 | ENSP00000396068 |
| ENSP00000356920 | ENSP00000358812 |
| ENSP00000356920 | ENSP00000359345 |
| ENSP00000356920 | ENSP00000361076 |
| ENSP00000356920 | ENSP00000364320 |
| ENSP00000356920 | ENSP00000367029 |
| ENSP00000356920 | ENSP00000377148 |
| ENSP00000356920 | ENSP00000378306 |
| ENSP00000356920 | ENSP00000411409 |
| ENSP00000356953 | ENSP00000364649 |
| ENSP00000356953 | ENSP00000364699 |
| ENSP00000356953 | ENSP00000365766 |
| ENSP00000356953 | ENSP00000387262 |
| ENSP00000356953 | ENSP00000417281 |
| ENSP00000356969 | ENSP00000361508 |
| ENSP00000356969 | ENSP00000381250 |
| ENSP00000356969 | ENSP00000396688 |
| ENSP00000356969 | ENSP00000411096 |
| ENSP00000356972 | ENSP00000369071 |
| ENSP00000356988 | ENSP00000357880 |
| ENSP00000356989 | ENSP00000357643 |
| ENSP00000356989 | ENSP00000357887 |

|                 |                 |
|-----------------|-----------------|
| ENSP00000356989 | ENSP00000360270 |
| ENSP00000356989 | ENSP00000360473 |
| ENSP00000356989 | ENSP00000360497 |
| ENSP00000356989 | ENSP00000361845 |
| ENSP00000356989 | ENSP00000363559 |
| ENSP00000356989 | ENSP00000363734 |
| ENSP00000356989 | ENSP00000369736 |
| ENSP00000356989 | ENSP00000371888 |
| ENSP00000356989 | ENSP00000372694 |
| ENSP00000356989 | ENSP00000373399 |
| ENSP00000356989 | ENSP00000374213 |
| ENSP00000356989 | ENSP00000376097 |
| ENSP00000356989 | ENSP00000377793 |
| ENSP00000356989 | ENSP00000382392 |
| ENSP00000356989 | ENSP00000382562 |
| ENSP00000356989 | ENSP00000397259 |
| ENSP00000356989 | ENSP00000410396 |
| ENSP00000356989 | ENSP00000412319 |
| ENSP00000356989 | ENSP00000415678 |
| ENSP00000356991 | ENSP00000373167 |
| ENSP00000356991 | ENSP00000377370 |
| ENSP00000356991 | ENSP00000383623 |
| ENSP00000356992 | ENSP00000370719 |
| ENSP00000357013 | ENSP00000357025 |
| ENSP00000357013 | ENSP00000364893 |
| ENSP00000357025 | ENSP00000358490 |
| ENSP00000357047 | ENSP00000357907 |
| ENSP00000357047 | ENSP00000362948 |
| ENSP00000357047 | ENSP00000363193 |
| ENSP00000357047 | ENSP00000365233 |
| ENSP00000357047 | ENSP00000384048 |
| ENSP00000357047 | ENSP00000391723 |
| ENSP00000357047 | ENSP00000391774 |
| ENSP00000357047 | ENSP00000392617 |
| ENSP00000357047 | ENSP00000415436 |
| ENSP00000357047 | ENSP00000418734 |
| ENSP00000357048 | ENSP00000358081 |
| ENSP00000357048 | ENSP00000359000 |
| ENSP00000357048 | ENSP00000360498 |
| ENSP00000357048 | ENSP00000360532 |
| ENSP00000357048 | ENSP00000360798 |
| ENSP00000357048 | ENSP00000362413 |
| ENSP00000357048 | ENSP00000363944 |
| ENSP00000357048 | ENSP00000364188 |
| ENSP00000357048 | ENSP00000368305 |
| ENSP00000357048 | ENSP00000379042 |

|                 |                 |
|-----------------|-----------------|
| ENSP00000357048 | ENSP00000379228 |
| ENSP00000357048 | ENSP00000388340 |
| ENSP00000357051 | ENSP00000358312 |
| ENSP00000357051 | ENSP00000386385 |
| ENSP00000357051 | ENSP00000407401 |
| ENSP00000357113 | ENSP00000361547 |
| ENSP00000357113 | ENSP00000371475 |
| ENSP00000357206 | ENSP00000363708 |
| ENSP00000357260 | ENSP00000363055 |
| ENSP00000357260 | ENSP00000370557 |
| ENSP00000357283 | ENSP00000358857 |
| ENSP00000357283 | ENSP00000359518 |
| ENSP00000357283 | ENSP00000360532 |
| ENSP00000357283 | ENSP00000362592 |
| ENSP00000357283 | ENSP00000363021 |
| ENSP00000357283 | ENSP00000364929 |
| ENSP00000357283 | ENSP00000366482 |
| ENSP00000357283 | ENSP00000367841 |
| ENSP00000357283 | ENSP00000369682 |
| ENSP00000357283 | ENSP00000370003 |
| ENSP00000357283 | ENSP00000371475 |
| ENSP00000357283 | ENSP00000377954 |
| ENSP00000357283 | ENSP00000379607 |
| ENSP00000357283 | ENSP00000380921 |
| ENSP00000357283 | ENSP00000402515 |
| ENSP00000357283 | ENSP00000408910 |
| ENSP00000357288 | ENSP00000358423 |
| ENSP00000357304 | ENSP00000360532 |
| ENSP00000357341 | ENSP00000379607 |
| ENSP00000357348 | ENSP00000359206 |
| ENSP00000357360 | ENSP00000361993 |
| ENSP00000357360 | ENSP00000368140 |
| ENSP00000357360 | ENSP00000387262 |
| ENSP00000357384 | ENSP00000360644 |
| ENSP00000357440 | ENSP00000357907 |
| ENSP00000357440 | ENSP00000358812 |
| ENSP00000357440 | ENSP00000360286 |
| ENSP00000357440 | ENSP00000361057 |
| ENSP00000357440 | ENSP00000378529 |
| ENSP00000357440 | ENSP00000381932 |
| ENSP00000357440 | ENSP00000384313 |
| ENSP00000357440 | ENSP00000401445 |
| ENSP00000357442 | ENSP00000360515 |
| ENSP00000357442 | ENSP00000363193 |
| ENSP00000357442 | ENSP00000392466 |
| ENSP00000357448 | ENSP00000359837 |

|                 |                 |
|-----------------|-----------------|
| ENSP00000357448 | ENSP00000373340 |
| ENSP00000357448 | ENSP00000403156 |
| ENSP00000357448 | ENSP00000418210 |
| ENSP00000357459 | ENSP00000379607 |
| ENSP00000357477 | ENSP00000370719 |
| ENSP00000357480 | ENSP00000357650 |
| ENSP00000357480 | ENSP00000359976 |
| ENSP00000357480 | ENSP00000361667 |
| ENSP00000357484 | ENSP00000358301 |
| ENSP00000357484 | ENSP00000362656 |
| ENSP00000357484 | ENSP00000374455 |
| ENSP00000357484 | ENSP00000377793 |
| ENSP00000357484 | ENSP00000382323 |
| ENSP00000357484 | ENSP00000389998 |
| ENSP00000357494 | ENSP00000359474 |
| ENSP00000357494 | ENSP00000363193 |
| ENSP00000357494 | ENSP00000363812 |
| ENSP00000357494 | ENSP00000368824 |
| ENSP00000357494 | ENSP00000370719 |
| ENSP00000357494 | ENSP00000372703 |
| ENSP00000357494 | ENSP00000379372 |
| ENSP00000357494 | ENSP00000392028 |
| ENSP00000357494 | ENSP00000393286 |
| ENSP00000357494 | ENSP00000393870 |
| ENSP00000357494 | ENSP00000400104 |
| ENSP00000357494 | ENSP00000402590 |
| ENSP00000357540 | ENSP00000368612 |
| ENSP00000357547 | ENSP00000359067 |
| ENSP00000357547 | ENSP00000360286 |
| ENSP00000357547 | ENSP00000361824 |
| ENSP00000357547 | ENSP00000370883 |
| ENSP00000357597 | ENSP00000362171 |
| ENSP00000357602 | ENSP00000360515 |
| ENSP00000357602 | ENSP00000368438 |
| ENSP00000357602 | ENSP00000369965 |
| ENSP00000357602 | ENSP00000372023 |
| ENSP00000357602 | ENSP00000402084 |
| ENSP00000357631 | ENSP00000358554 |
| ENSP00000357631 | ENSP00000359454 |
| ENSP00000357631 | ENSP00000360532 |
| ENSP00000357631 | ENSP00000361577 |
| ENSP00000357631 | ENSP00000362110 |
| ENSP00000357631 | ENSP00000366557 |
| ENSP00000357631 | ENSP00000412566 |
| ENSP00000357643 | ENSP00000368976 |
| ENSP00000357643 | ENSP00000374566 |



|                 |                 |
|-----------------|-----------------|
| ENSP00000357643 | ENSP00000377793 |
| ENSP00000357643 | ENSP00000379607 |
| ENSP00000357650 | ENSP00000385083 |
| ENSP00000357650 | ENSP00000416511 |
| ENSP00000357651 | ENSP00000367797 |
| ENSP00000357651 | ENSP00000369736 |
| ENSP00000357651 | ENSP00000370589 |
| ENSP00000357651 | ENSP00000382562 |
| ENSP00000357674 | ENSP00000365439 |
| ENSP00000357674 | ENSP00000369816 |
| ENSP00000357674 | ENSP00000380598 |
| ENSP00000357683 | ENSP00000379607 |
| ENSP00000357711 | ENSP00000379607 |
| ENSP00000357731 | ENSP00000357753 |
| ENSP00000357748 | ENSP00000359211 |
| ENSP00000357748 | ENSP00000363559 |
| ENSP00000357748 | ENSP00000369497 |
| ENSP00000357748 | ENSP00000370377 |
| ENSP00000357748 | ENSP00000370930 |
| ENSP00000357748 | ENSP00000373399 |
| ENSP00000357748 | ENSP00000377865 |
| ENSP00000357753 | ENSP00000377496 |
| ENSP00000357775 | ENSP00000360918 |
| ENSP00000357775 | ENSP00000386284 |
| ENSP00000357789 | ENSP00000366936 |
| ENSP00000357789 | ENSP00000379607 |
| ENSP00000357791 | ENSP00000379607 |
| ENSP00000357791 | ENSP00000409279 |
| ENSP00000357807 | ENSP00000369335 |
| ENSP00000357807 | ENSP00000387262 |
| ENSP00000357812 | ENSP00000417229 |
| ENSP00000357823 | ENSP00000360286 |
| ENSP00000357836 | ENSP00000386227 |
| ENSP00000357863 | ENSP00000361180 |
| ENSP00000357863 | ENSP00000361219 |
| ENSP00000357880 | ENSP00000361699 |
| ENSP00000357880 | ENSP00000365891 |
| ENSP00000357880 | ENSP00000369519 |
| ENSP00000357882 | ENSP00000363779 |
| ENSP00000357887 | ENSP00000357965 |
| ENSP00000357887 | ENSP00000358478 |
| ENSP00000357887 | ENSP00000359518 |
| ENSP00000357887 | ENSP00000359818 |
| ENSP00000357887 | ENSP00000360116 |
| ENSP00000357887 | ENSP00000360473 |
| ENSP00000357887 | ENSP00000360515 |

|                 |                 |
|-----------------|-----------------|
| ENSP00000357887 | ENSP00000362166 |
| ENSP00000357887 | ENSP00000363734 |
| ENSP00000357887 | ENSP00000366135 |
| ENSP00000357887 | ENSP00000372694 |
| ENSP00000357887 | ENSP00000374213 |
| ENSP00000357887 | ENSP00000374280 |
| ENSP00000357887 | ENSP00000380054 |
| ENSP00000357887 | ENSP00000380460 |
| ENSP00000357887 | ENSP00000381031 |
| ENSP00000357887 | ENSP00000382562 |
| ENSP00000357887 | ENSP00000382688 |
| ENSP00000357887 | ENSP00000383503 |
| ENSP00000357887 | ENSP00000386759 |
| ENSP00000357887 | ENSP00000390475 |
| ENSP00000357887 | ENSP00000397636 |
| ENSP00000357887 | ENSP00000402240 |
| ENSP00000357887 | ENSP00000405636 |
| ENSP00000357887 | ENSP00000406293 |
| ENSP00000357887 | ENSP00000410530 |
| ENSP00000357887 | ENSP00000410954 |
| ENSP00000357887 | ENSP00000412319 |
| ENSP00000357887 | ENSP00000414110 |
| ENSP00000357887 | ENSP00000414187 |
| ENSP00000357887 | ENSP00000415678 |
| ENSP00000357887 | ENSP00000416599 |
| ENSP00000357907 | ENSP00000359444 |
| ENSP00000357907 | ENSP00000360371 |
| ENSP00000357907 | ENSP00000361014 |
| ENSP00000357907 | ENSP00000362948 |
| ENSP00000357907 | ENSP00000363193 |
| ENSP00000357907 | ENSP00000365588 |
| ENSP00000357907 | ENSP00000367406 |
| ENSP00000357907 | ENSP00000369162 |
| ENSP00000357907 | ENSP00000373060 |
| ENSP00000357907 | ENSP00000378338 |
| ENSP00000357907 | ENSP00000384048 |
| ENSP00000357907 | ENSP00000386759 |
| ENSP00000357907 | ENSP00000387429 |
| ENSP00000357907 | ENSP00000391774 |
| ENSP00000357907 | ENSP00000392617 |
| ENSP00000357907 | ENSP00000396484 |
| ENSP00000357907 | ENSP00000404318 |
| ENSP00000357907 | ENSP00000409167 |
| ENSP00000357907 | ENSP00000415212 |
| ENSP00000357907 | ENSP00000416511 |
| ENSP00000357914 | ENSP00000367910 |

|                 |                 |
|-----------------|-----------------|
| ENSP00000357917 | ENSP00000416511 |
| ENSP00000357965 | ENSP00000358778 |
| ENSP00000357965 | ENSP00000358918 |
| ENSP00000357965 | ENSP00000360329 |
| ENSP00000357965 | ENSP00000361949 |
| ENSP00000357965 | ENSP00000365877 |
| ENSP00000357965 | ENSP00000366513 |
| ENSP00000357965 | ENSP00000367030 |
| ENSP00000357965 | ENSP00000368438 |
| ENSP00000357965 | ENSP00000374213 |
| ENSP00000357965 | ENSP00000374280 |
| ENSP00000357965 | ENSP00000380718 |
| ENSP00000357965 | ENSP00000381891 |
| ENSP00000357965 | ENSP00000417281 |
| ENSP00000357965 | ENSP00000417980 |
| ENSP00000357973 | ENSP00000361686 |
| ENSP00000357980 | ENSP00000363489 |
| ENSP00000357980 | ENSP00000379158 |
| ENSP00000357980 | ENSP00000380718 |
| ENSP00000357980 | ENSP00000386722 |
| ENSP00000357980 | ENSP00000416097 |
| ENSP00000357998 | ENSP00000359067 |
| ENSP00000357998 | ENSP00000359837 |
| ENSP00000357998 | ENSP00000360327 |
| ENSP00000357998 | ENSP00000361667 |
| ENSP00000357998 | ENSP00000361845 |
| ENSP00000357998 | ENSP00000362041 |
| ENSP00000357998 | ENSP00000362688 |
| ENSP00000357998 | ENSP00000363944 |
| ENSP00000357998 | ENSP00000364188 |
| ENSP00000357998 | ENSP00000366179 |
| ENSP00000357998 | ENSP00000366395 |
| ENSP00000357998 | ENSP00000368523 |
| ENSP00000357998 | ENSP00000368565 |
| ENSP00000357998 | ENSP00000368959 |
| ENSP00000357998 | ENSP00000369042 |
| ENSP00000357998 | ENSP00000370607 |
| ENSP00000357998 | ENSP00000371451 |
| ENSP00000357998 | ENSP00000381293 |
| ENSP00000357998 | ENSP00000385083 |
| ENSP00000357998 | ENSP00000392330 |
| ENSP00000357998 | ENSP00000401445 |
| ENSP00000358019 | ENSP00000365588 |
| ENSP00000358019 | ENSP00000369335 |
| ENSP00000358019 | ENSP00000373060 |
| ENSP00000358019 | ENSP00000375986 |

|                 |                 |
|-----------------|-----------------|
| ENSP00000358019 | ENSP00000384048 |
| ENSP00000358019 | ENSP00000387429 |
| ENSP00000358019 | ENSP00000396484 |
| ENSP00000358019 | ENSP00000404318 |
| ENSP00000358019 | ENSP00000409167 |
| ENSP00000358019 | ENSP00000415212 |
| ENSP00000358019 | ENSP00000416511 |
| ENSP00000358022 | ENSP00000363591 |
| ENSP00000358022 | ENSP00000368438 |
| ENSP00000358033 | ENSP00000368439 |
| ENSP00000358033 | ENSP00000379908 |
| ENSP00000358042 | ENSP00000360268 |
| ENSP00000358042 | ENSP00000367079 |
| ENSP00000358042 | ENSP00000370377 |
| ENSP00000358043 | ENSP00000363827 |
| ENSP00000358043 | ENSP00000370003 |
| ENSP00000358062 | ENSP00000378295 |
| ENSP00000358064 | ENSP00000386161 |
| ENSP00000358071 | ENSP00000368438 |
| ENSP00000358081 | ENSP00000358997 |
| ENSP00000358081 | ENSP00000361027 |
| ENSP00000358081 | ENSP00000371341 |
| ENSP00000358081 | ENSP00000374455 |
| ENSP00000358081 | ENSP00000377496 |
| ENSP00000358081 | ENSP00000383719 |
| ENSP00000358092 | ENSP00000365877 |
| ENSP00000358105 | ENSP00000368698 |
| ENSP00000358120 | ENSP00000419126 |
| ENSP00000358140 | ENSP00000358497 |
| ENSP00000358140 | ENSP00000358563 |
| ENSP00000358140 | ENSP00000359385 |
| ENSP00000358140 | ENSP00000359531 |
| ENSP00000358140 | ENSP00000361949 |
| ENSP00000358140 | ENSP00000361982 |
| ENSP00000358140 | ENSP00000362688 |
| ENSP00000358140 | ENSP00000363559 |
| ENSP00000358140 | ENSP00000363944 |
| ENSP00000358140 | ENSP00000364119 |
| ENSP00000358140 | ENSP00000365025 |
| ENSP00000358140 | ENSP00000373082 |
| ENSP00000358140 | ENSP00000376946 |
| ENSP00000358140 | ENSP00000378529 |
| ENSP00000358140 | ENSP00000379888 |
| ENSP00000358140 | ENSP00000389065 |
| ENSP00000358140 | ENSP00000411327 |
| ENSP00000358140 | ENSP00000412553 |

|                 |                 |
|-----------------|-----------------|
| ENSP00000358140 | ENSP00000413319 |
| ENSP00000358140 | ENSP00000414373 |
| ENSP00000358140 | ENSP00000416892 |
| ENSP00000358146 | ENSP00000360147 |
| ENSP00000358146 | ENSP00000370150 |
| ENSP00000358147 | ENSP00000365588 |
| ENSP00000358147 | ENSP00000371475 |
| ENSP00000358147 | ENSP00000373060 |
| ENSP00000358147 | ENSP00000384048 |
| ENSP00000358147 | ENSP00000387429 |
| ENSP00000358147 | ENSP00000389934 |
| ENSP00000358147 | ENSP00000395574 |
| ENSP00000358147 | ENSP00000396484 |
| ENSP00000358147 | ENSP00000404318 |
| ENSP00000358147 | ENSP00000409167 |
| ENSP00000358147 | ENSP00000415212 |
| ENSP00000358147 | ENSP00000416511 |
| ENSP00000358147 | ENSP00000417748 |
| ENSP00000358242 | ENSP00000359042 |
| ENSP00000358242 | ENSP00000360464 |
| ENSP00000358242 | ENSP00000377520 |
| ENSP00000358242 | ENSP00000414321 |
| ENSP00000358283 | ENSP00000379394 |
| ENSP00000358301 | ENSP00000360916 |
| ENSP00000358301 | ENSP00000361640 |
| ENSP00000358301 | ENSP00000400258 |
| ENSP00000358312 | ENSP00000407401 |
| ENSP00000358335 | ENSP00000358997 |
| ENSP00000358335 | ENSP00000363089 |
| ENSP00000358335 | ENSP00000363559 |
| ENSP00000358335 | ENSP00000363680 |
| ENSP00000358335 | ENSP00000363779 |
| ENSP00000358335 | ENSP00000376445 |
| ENSP00000358335 | ENSP00000376946 |
| ENSP00000358335 | ENSP00000380150 |
| ENSP00000358335 | ENSP00000389111 |
| ENSP00000358335 | ENSP00000394863 |
| ENSP00000358335 | ENSP00000401980 |
| ENSP00000358360 | ENSP00000360532 |
| ENSP00000358360 | ENSP00000383719 |
| ENSP00000358360 | ENSP00000399511 |
| ENSP00000358374 | ENSP00000362820 |
| ENSP00000358374 | ENSP00000362900 |
| ENSP00000358400 | ENSP00000360286 |
| ENSP00000358400 | ENSP00000360532 |
| ENSP00000358400 | ENSP00000360828 |

|                 |                 |
|-----------------|-----------------|
| ENSP00000358400 | ENSP00000361232 |
| ENSP00000358400 | ENSP00000361287 |
| ENSP00000358400 | ENSP00000362153 |
| ENSP00000358400 | ENSP00000363384 |
| ENSP00000358400 | ENSP00000363944 |
| ENSP00000358400 | ENSP00000364037 |
| ENSP00000358400 | ENSP00000364320 |
| ENSP00000358400 | ENSP00000365806 |
| ENSP00000358400 | ENSP00000366974 |
| ENSP00000358400 | ENSP00000369042 |
| ENSP00000358400 | ENSP00000373090 |
| ENSP00000358400 | ENSP00000380495 |
| ENSP00000358400 | ENSP00000388872 |
| ENSP00000358400 | ENSP00000394290 |
| ENSP00000358400 | ENSP00000403576 |
| ENSP00000358400 | ENSP00000409074 |
| ENSP00000358400 | ENSP00000409367 |
| ENSP00000358400 | ENSP00000411162 |
| ENSP00000358404 | ENSP00000359206 |
| ENSP00000358404 | ENSP00000359567 |
| ENSP00000358404 | ENSP00000365735 |
| ENSP00000358404 | ENSP00000396876 |
| ENSP00000358404 | ENSP00000399511 |
| ENSP00000358404 | ENSP00000414187 |
| ENSP00000358417 | ENSP00000360532 |
| ENSP00000358417 | ENSP00000361005 |
| ENSP00000358417 | ENSP00000361064 |
| ENSP00000358417 | ENSP00000361699 |
| ENSP00000358417 | ENSP00000362424 |
| ENSP00000358417 | ENSP00000365435 |
| ENSP00000358417 | ENSP00000365735 |
| ENSP00000358423 | ENSP00000401177 |
| ENSP00000358478 | ENSP00000358576 |
| ENSP00000358478 | ENSP00000359290 |
| ENSP00000358478 | ENSP00000360532 |
| ENSP00000358478 | ENSP00000361310 |
| ENSP00000358478 | ENSP00000364270 |
| ENSP00000358478 | ENSP00000368646 |
| ENSP00000358478 | ENSP00000369335 |
| ENSP00000358478 | ENSP00000370150 |
| ENSP00000358478 | ENSP00000370151 |
| ENSP00000358478 | ENSP00000370408 |
| ENSP00000358478 | ENSP00000374280 |
| ENSP00000358478 | ENSP00000380460 |
| ENSP00000358478 | ENSP00000381657 |
| ENSP00000358478 | ENSP00000402515 |

|                 |                 |
|-----------------|-----------------|
| ENSP00000358478 | ENSP00000417281 |
| ENSP00000358490 | ENSP00000358501 |
| ENSP00000358490 | ENSP00000358770 |
| ENSP00000358490 | ENSP00000380921 |
| ENSP00000358490 | ENSP00000387170 |
| ENSP00000358491 | ENSP00000381031 |
| ENSP00000358497 | ENSP00000360286 |
| ENSP00000358497 | ENSP00000361465 |
| ENSP00000358497 | ENSP00000362166 |
| ENSP00000358497 | ENSP00000364847 |
| ENSP00000358497 | ENSP00000366121 |
| ENSP00000358497 | ENSP00000366974 |
| ENSP00000358497 | ENSP00000370258 |
| ENSP00000358497 | ENSP00000372689 |
| ENSP00000358497 | ENSP00000381293 |
| ENSP00000358497 | ENSP00000384675 |
| ENSP00000358497 | ENSP00000388872 |
| ENSP00000358497 | ENSP00000396704 |
| ENSP00000358511 | ENSP00000381891 |
| ENSP00000358554 | ENSP00000359454 |
| ENSP00000358554 | ENSP00000360532 |
| ENSP00000358554 | ENSP00000366557 |
| ENSP00000358554 | ENSP00000366607 |
| ENSP00000358554 | ENSP00000376973 |
| ENSP00000358554 | ENSP00000379607 |
| ENSP00000358554 | ENSP00000386227 |
| ENSP00000358554 | ENSP00000387310 |
| ENSP00000358563 | ENSP00000358812 |
| ENSP00000358563 | ENSP00000359454 |
| ENSP00000358563 | ENSP00000360031 |
| ENSP00000358563 | ENSP00000360412 |
| ENSP00000358563 | ENSP00000360828 |
| ENSP00000358563 | ENSP00000361076 |
| ENSP00000358563 | ENSP00000361232 |
| ENSP00000358563 | ENSP00000361465 |
| ENSP00000358563 | ENSP00000361949 |
| ENSP00000358563 | ENSP00000362041 |
| ENSP00000358563 | ENSP00000362153 |
| ENSP00000358563 | ENSP00000362744 |
| ENSP00000358563 | ENSP00000362936 |
| ENSP00000358563 | ENSP00000363559 |
| ENSP00000358563 | ENSP00000363944 |
| ENSP00000358563 | ENSP00000364289 |
| ENSP00000358563 | ENSP00000364543 |
| ENSP00000358563 | ENSP00000365806 |
| ENSP00000358563 | ENSP00000365837 |

|                 |                 |
|-----------------|-----------------|
| ENSP00000358563 | ENSP00000366135 |
| ENSP00000358563 | ENSP00000366557 |
| ENSP00000358563 | ENSP00000366843 |
| ENSP00000358563 | ENSP00000366974 |
| ENSP00000358563 | ENSP00000367029 |
| ENSP00000358563 | ENSP00000368589 |
| ENSP00000358563 | ENSP00000368887 |
| ENSP00000358563 | ENSP00000370258 |
| ENSP00000358563 | ENSP00000370589 |
| ENSP00000358563 | ENSP00000370741 |
| ENSP00000358563 | ENSP00000371451 |
| ENSP00000358563 | ENSP00000372199 |
| ENSP00000358563 | ENSP00000372827 |
| ENSP00000358563 | ENSP00000373090 |
| ENSP00000358563 | ENSP00000374280 |
| ENSP00000358563 | ENSP00000374390 |
| ENSP00000358563 | ENSP00000379607 |
| ENSP00000358563 | ENSP00000379888 |
| ENSP00000358563 | ENSP00000380129 |
| ENSP00000358563 | ENSP00000380453 |
| ENSP00000358563 | ENSP00000380982 |
| ENSP00000358563 | ENSP00000384302 |
| ENSP00000358563 | ENSP00000392028 |
| ENSP00000358563 | ENSP00000394290 |
| ENSP00000358563 | ENSP00000394400 |
| ENSP00000358563 | ENSP00000396704 |
| ENSP00000358563 | ENSP00000399530 |
| ENSP00000358563 | ENSP00000400626 |
| ENSP00000358563 | ENSP00000403576 |
| ENSP00000358563 | ENSP00000409074 |
| ENSP00000358563 | ENSP00000409367 |
| ENSP00000358563 | ENSP00000411162 |
| ENSP00000358563 | ENSP00000412310 |
| ENSP00000358563 | ENSP00000412566 |
| ENSP00000358563 | ENSP00000417229 |
| ENSP00000358576 | ENSP00000360116 |
| ENSP00000358576 | ENSP00000364543 |
| ENSP00000358576 | ENSP00000372827 |
| ENSP00000358576 | ENSP00000375809 |
| ENSP00000358576 | ENSP00000394400 |
| ENSP00000358576 | ENSP00000399530 |
| ENSP00000358576 | ENSP00000400626 |
| ENSP00000358576 | ENSP00000412310 |
| ENSP00000358605 | ENSP00000361009 |
| ENSP00000358605 | ENSP00000362110 |
| ENSP00000358605 | ENSP00000370719 |



|                 |                 |
|-----------------|-----------------|
| ENSP00000358605 | ENSP00000381031 |
| ENSP00000358605 | ENSP00000412566 |
| ENSP00000358695 | ENSP00000359305 |
| ENSP00000358695 | ENSP00000361686 |
| ENSP00000358695 | ENSP00000378350 |
| ENSP00000358695 | ENSP00000397441 |
| ENSP00000358716 | ENSP00000358812 |
| ENSP00000358716 | ENSP00000360412 |
| ENSP00000358716 | ENSP00000361465 |
| ENSP00000358716 | ENSP00000363676 |
| ENSP00000358716 | ENSP00000365175 |
| ENSP00000358716 | ENSP00000367029 |
| ENSP00000358716 | ENSP00000370083 |
| ENSP00000358716 | ENSP00000370119 |
| ENSP00000358716 | ENSP00000387170 |
| ENSP00000358716 | ENSP00000387477 |
| ENSP00000358716 | ENSP00000393953 |
| ENSP00000358716 | ENSP00000400591 |
| ENSP00000358716 | ENSP00000412566 |
| ENSP00000358716 | ENSP00000414006 |
| ENSP00000358716 | ENSP00000415363 |
| ENSP00000358737 | ENSP00000358831 |
| ENSP00000358737 | ENSP00000361686 |
| ENSP00000358737 | ENSP00000370414 |
| ENSP00000358737 | ENSP00000387262 |
| ENSP00000358737 | ENSP00000389649 |
| ENSP00000358742 | ENSP00000360532 |
| ENSP00000358742 | ENSP00000362424 |
| ENSP00000358770 | ENSP00000365891 |
| ENSP00000358770 | ENSP00000366513 |
| ENSP00000358777 | ENSP00000365756 |
| ENSP00000358777 | ENSP00000366395 |
| ENSP00000358777 | ENSP00000367697 |
| ENSP00000358778 | ENSP00000368797 |
| ENSP00000358778 | ENSP00000369716 |
| ENSP00000358778 | ENSP00000378180 |
| ENSP00000358778 | ENSP00000378338 |
| ENSP00000358778 | ENSP00000387262 |
| ENSP00000358799 | ENSP00000366843 |
| ENSP00000358799 | ENSP00000370119 |
| ENSP00000358799 | ENSP00000379607 |
| ENSP00000358807 | ENSP00000372023 |
| ENSP00000358810 | ENSP00000359454 |
| ENSP00000358810 | ENSP00000370719 |
| ENSP00000358810 | ENSP00000371888 |
| ENSP00000358810 | ENSP00000373340 |

|                 |                 |
|-----------------|-----------------|
| ENSP00000358810 | ENSP00000379933 |
| ENSP00000358810 | ENSP00000386227 |
| ENSP00000358812 | ENSP00000358831 |
| ENSP00000358812 | ENSP00000359688 |
| ENSP00000358812 | ENSP00000360031 |
| ENSP00000358812 | ENSP00000360828 |
| ENSP00000358812 | ENSP00000361010 |
| ENSP00000358812 | ENSP00000361232 |
| ENSP00000358812 | ENSP00000361949 |
| ENSP00000358812 | ENSP00000361982 |
| ENSP00000358812 | ENSP00000362744 |
| ENSP00000358812 | ENSP00000363018 |
| ENSP00000358812 | ENSP00000363746 |
| ENSP00000358812 | ENSP00000363944 |
| ENSP00000358812 | ENSP00000364320 |
| ENSP00000358812 | ENSP00000365837 |
| ENSP00000358812 | ENSP00000366519 |
| ENSP00000358812 | ENSP00000368887 |
| ENSP00000358812 | ENSP00000368984 |
| ENSP00000358812 | ENSP00000370589 |
| ENSP00000358812 | ENSP00000371201 |
| ENSP00000358812 | ENSP00000372199 |
| ENSP00000358812 | ENSP00000372695 |
| ENSP00000358812 | ENSP00000379607 |
| ENSP00000358812 | ENSP00000379888 |
| ENSP00000358812 | ENSP00000380495 |
| ENSP00000358812 | ENSP00000380982 |
| ENSP00000358812 | ENSP00000381654 |
| ENSP00000358812 | ENSP00000382392 |
| ENSP00000358812 | ENSP00000384302 |
| ENSP00000358812 | ENSP00000387303 |
| ENSP00000358812 | ENSP00000388464 |
| ENSP00000358812 | ENSP00000390621 |
| ENSP00000358812 | ENSP00000392601 |
| ENSP00000358812 | ENSP00000393953 |
| ENSP00000358812 | ENSP00000399454 |
| ENSP00000358812 | ENSP00000402338 |
| ENSP00000358812 | ENSP00000402869 |
| ENSP00000358812 | ENSP00000405614 |
| ENSP00000358812 | ENSP00000419740 |
| ENSP00000358831 | ENSP00000359380 |
| ENSP00000358831 | ENSP00000368438 |
| ENSP00000358831 | ENSP00000370607 |
| ENSP00000358831 | ENSP00000415203 |
| ENSP00000358831 | ENSP00000420608 |
| ENSP00000358854 | ENSP00000360286 |

|                 |                 |
|-----------------|-----------------|
| ENSP00000358854 | ENSP00000360515 |
| ENSP00000358854 | ENSP00000362068 |
| ENSP00000358854 | ENSP00000366557 |
| ENSP00000358854 | ENSP00000366974 |
| ENSP00000358854 | ENSP00000367406 |
| ENSP00000358854 | ENSP00000368801 |
| ENSP00000358854 | ENSP00000369162 |
| ENSP00000358854 | ENSP00000369695 |
| ENSP00000358854 | ENSP00000369716 |
| ENSP00000358854 | ENSP00000376946 |
| ENSP00000358854 | ENSP00000377747 |
| ENSP00000358854 | ENSP00000378736 |
| ENSP00000358854 | ENSP00000379372 |
| ENSP00000358854 | ENSP00000387006 |
| ENSP00000358854 | ENSP00000392028 |
| ENSP00000358854 | ENSP00000408994 |
| ENSP00000358857 | ENSP00000359375 |
| ENSP00000358857 | ENSP00000361824 |
| ENSP00000358857 | ENSP00000362306 |
| ENSP00000358857 | ENSP00000379607 |
| ENSP00000358862 | ENSP00000360116 |
| ENSP00000358862 | ENSP00000384490 |
| ENSP00000358862 | ENSP00000396439 |
| ENSP00000358862 | ENSP00000419494 |
| ENSP00000358886 | ENSP00000359290 |
| ENSP00000358886 | ENSP00000377969 |
| ENSP00000358902 | ENSP00000368824 |
| ENSP00000358918 | ENSP00000359206 |
| ENSP00000358918 | ENSP00000371398 |
| ENSP00000358918 | ENSP00000378782 |
| ENSP00000358925 | ENSP00000380921 |
| ENSP00000358925 | ENSP00000397956 |
| ENSP00000358953 | ENSP00000381031 |
| ENSP00000358956 | ENSP00000358997 |
| ENSP00000358994 | ENSP00000365891 |
| ENSP00000358994 | ENSP00000379612 |
| ENSP00000358994 | ENSP00000386165 |
| ENSP00000358994 | ENSP00000407487 |
| ENSP00000358997 | ENSP00000363089 |
| ENSP00000358997 | ENSP00000363095 |
| ENSP00000358997 | ENSP00000363559 |
| ENSP00000358997 | ENSP00000364847 |
| ENSP00000358997 | ENSP00000367841 |
| ENSP00000358997 | ENSP00000371471 |
| ENSP00000358997 | ENSP00000374455 |
| ENSP00000358997 | ENSP00000376445 |

|                 |                 |
|-----------------|-----------------|
| ENSP00000358997 | ENSP00000378306 |
| ENSP00000359000 | ENSP00000359904 |
| ENSP00000359000 | ENSP00000360329 |
| ENSP00000359000 | ENSP00000361206 |
| ENSP00000359000 | ENSP00000366135 |
| ENSP00000359000 | ENSP00000368797 |
| ENSP00000359000 | ENSP00000372023 |
| ENSP00000359000 | ENSP00000373979 |
| ENSP00000359000 | ENSP00000377280 |
| ENSP00000359000 | ENSP00000378529 |
| ENSP00000359000 | ENSP00000388872 |
| ENSP00000359000 | ENSP00000404247 |
| ENSP00000359049 | ENSP00000378306 |
| ENSP00000359067 | ENSP00000369820 |
| ENSP00000359067 | ENSP00000372697 |
| ENSP00000359067 | ENSP00000377280 |
| ENSP00000359067 | ENSP00000385083 |
| ENSP00000359067 | ENSP00000389934 |
| ENSP00000359067 | ENSP00000390831 |
| ENSP00000359067 | ENSP00000391197 |
| ENSP00000359067 | ENSP00000402240 |
| ENSP00000359067 | ENSP00000404016 |
| ENSP00000359067 | ENSP00000406988 |
| ENSP00000359067 | ENSP00000409952 |
| ENSP00000359096 | ENSP00000379607 |
| ENSP00000359100 | ENSP00000379607 |
| ENSP00000359127 | ENSP00000360782 |
| ENSP00000359127 | ENSP00000400591 |
| ENSP00000359127 | ENSP00000410758 |
| ENSP00000359206 | ENSP00000362824 |
| ENSP00000359206 | ENSP00000364277 |
| ENSP00000359206 | ENSP00000365439 |
| ENSP00000359206 | ENSP00000368686 |
| ENSP00000359206 | ENSP00000368698 |
| ENSP00000359206 | ENSP00000368805 |
| ENSP00000359206 | ENSP00000371875 |
| ENSP00000359206 | ENSP00000375082 |
| ENSP00000359206 | ENSP00000379457 |
| ENSP00000359206 | ENSP00000396937 |
| ENSP00000359206 | ENSP00000402084 |
| ENSP00000359206 | ENSP00000417281 |
| ENSP00000359211 | ENSP00000359531 |
| ENSP00000359211 | ENSP00000372654 |
| ENSP00000359211 | ENSP00000377865 |
| ENSP00000359211 | ENSP00000381220 |
| ENSP00000359211 | ENSP00000389934 |

|                 |                 |
|-----------------|-----------------|
| ENSP00000359215 | ENSP00000368332 |
| ENSP00000359222 | ENSP00000411409 |
| ENSP00000359224 | ENSP00000360644 |
| ENSP00000359224 | ENSP00000361047 |
| ENSP00000359224 | ENSP00000361625 |
| ENSP00000359285 | ENSP00000380605 |
| ENSP00000359290 | ENSP00000359305 |
| ENSP00000359290 | ENSP00000359531 |
| ENSP00000359290 | ENSP00000359837 |
| ENSP00000359290 | ENSP00000360515 |
| ENSP00000359290 | ENSP00000366974 |
| ENSP00000359290 | ENSP00000369695 |
| ENSP00000359290 | ENSP00000370105 |
| ENSP00000359290 | ENSP00000385903 |
| ENSP00000359290 | ENSP00000396620 |
| ENSP00000359291 | ENSP00000366121 |
| ENSP00000359305 | ENSP00000359380 |
| ENSP00000359305 | ENSP00000361057 |
| ENSP00000359305 | ENSP00000361686 |
| ENSP00000359305 | ENSP00000364188 |
| ENSP00000359305 | ENSP00000365534 |
| ENSP00000359305 | ENSP00000366395 |
| ENSP00000359305 | ENSP00000404381 |
| ENSP00000359321 | ENSP00000362592 |
| ENSP00000359321 | ENSP00000376204 |
| ENSP00000359321 | ENSP00000394472 |
| ENSP00000359321 | ENSP00000404658 |
| ENSP00000359321 | ENSP00000418734 |
| ENSP00000359345 | ENSP00000359688 |
| ENSP00000359345 | ENSP00000360031 |
| ENSP00000359345 | ENSP00000360412 |
| ENSP00000359345 | ENSP00000360828 |
| ENSP00000359345 | ENSP00000361032 |
| ENSP00000359345 | ENSP00000361076 |
| ENSP00000359345 | ENSP00000361418 |
| ENSP00000359345 | ENSP00000361824 |
| ENSP00000359345 | ENSP00000361949 |
| ENSP00000359345 | ENSP00000362153 |
| ENSP00000359345 | ENSP00000362334 |
| ENSP00000359345 | ENSP00000362744 |
| ENSP00000359345 | ENSP00000363018 |
| ENSP00000359345 | ENSP00000363559 |
| ENSP00000359345 | ENSP00000363676 |
| ENSP00000359345 | ENSP00000364320 |
| ENSP00000359345 | ENSP00000365025 |
| ENSP00000359345 | ENSP00000365806 |

|                 |                 |
|-----------------|-----------------|
| ENSP00000359345 | ENSP00000366519 |
| ENSP00000359345 | ENSP00000368565 |
| ENSP00000359345 | ENSP00000369042 |
| ENSP00000359345 | ENSP00000370589 |
| ENSP00000359345 | ENSP00000371201 |
| ENSP00000359345 | ENSP00000372199 |
| ENSP00000359345 | ENSP00000373082 |
| ENSP00000359345 | ENSP00000373090 |
| ENSP00000359345 | ENSP00000373404 |
| ENSP00000359345 | ENSP00000375730 |
| ENSP00000359345 | ENSP00000377486 |
| ENSP00000359345 | ENSP00000377617 |
| ENSP00000359345 | ENSP00000377640 |
| ENSP00000359345 | ENSP00000377865 |
| ENSP00000359345 | ENSP00000378160 |
| ENSP00000359345 | ENSP00000379394 |
| ENSP00000359345 | ENSP00000379607 |
| ENSP00000359345 | ENSP00000379888 |
| ENSP00000359345 | ENSP00000380156 |
| ENSP00000359345 | ENSP00000380453 |
| ENSP00000359345 | ENSP00000380495 |
| ENSP00000359345 | ENSP00000380982 |
| ENSP00000359345 | ENSP00000382392 |
| ENSP00000359345 | ENSP00000386456 |
| ENSP00000359345 | ENSP00000386717 |
| ENSP00000359345 | ENSP00000388464 |
| ENSP00000359345 | ENSP00000389065 |
| ENSP00000359345 | ENSP00000389103 |
| ENSP00000359345 | ENSP00000392859 |
| ENSP00000359345 | ENSP00000393393 |
| ENSP00000359345 | ENSP00000394290 |
| ENSP00000359345 | ENSP00000401371 |
| ENSP00000359345 | ENSP00000402338 |
| ENSP00000359345 | ENSP00000403576 |
| ENSP00000359345 | ENSP00000409074 |
| ENSP00000359345 | ENSP00000409367 |
| ENSP00000359345 | ENSP00000411162 |
| ENSP00000359345 | ENSP00000411327 |
| ENSP00000359345 | ENSP00000412553 |
| ENSP00000359345 | ENSP00000413152 |
| ENSP00000359345 | ENSP00000413319 |
| ENSP00000359345 | ENSP00000414373 |
| ENSP00000359345 | ENSP00000417281 |
| ENSP00000359345 | ENSP00000419740 |
| ENSP00000359356 | ENSP00000378295 |
| ENSP00000359376 | ENSP00000363021 |

|                 |                 |
|-----------------|-----------------|
| ENSP00000359380 | ENSP00000361667 |
| ENSP00000359380 | ENSP00000373404 |
| ENSP00000359380 | ENSP00000379457 |
| ENSP00000359380 | ENSP00000380184 |
| ENSP00000359380 | ENSP00000386878 |
| ENSP00000359380 | ENSP00000395863 |
| ENSP00000359380 | ENSP00000401287 |
| ENSP00000359384 | ENSP00000359392 |
| ENSP00000359385 | ENSP00000412292 |
| ENSP00000359444 | ENSP00000396452 |
| ENSP00000359454 | ENSP00000361982 |
| ENSP00000359454 | ENSP00000362110 |
| ENSP00000359454 | ENSP00000362936 |
| ENSP00000359454 | ENSP00000364289 |
| ENSP00000359454 | ENSP00000364543 |
| ENSP00000359454 | ENSP00000366557 |
| ENSP00000359454 | ENSP00000367835 |
| ENSP00000359454 | ENSP00000368565 |
| ENSP00000359454 | ENSP00000370589 |
| ENSP00000359454 | ENSP00000372827 |
| ENSP00000359454 | ENSP00000376973 |
| ENSP00000359454 | ENSP00000387006 |
| ENSP00000359454 | ENSP00000393953 |
| ENSP00000359454 | ENSP00000394400 |
| ENSP00000359454 | ENSP00000399530 |
| ENSP00000359454 | ENSP00000400626 |
| ENSP00000359454 | ENSP00000401566 |
| ENSP00000359454 | ENSP00000412310 |
| ENSP00000359484 | ENSP00000360798 |
| ENSP00000359484 | ENSP00000369860 |
| ENSP00000359484 | ENSP00000381863 |
| ENSP00000359507 | ENSP00000370410 |
| ENSP00000359507 | ENSP00000386394 |
| ENSP00000359518 | ENSP00000360916 |
| ENSP00000359518 | ENSP00000362166 |
| ENSP00000359518 | ENSP00000363734 |
| ENSP00000359518 | ENSP00000364929 |
| ENSP00000359518 | ENSP00000365439 |
| ENSP00000359518 | ENSP00000366135 |
| ENSP00000359518 | ENSP00000369860 |
| ENSP00000359518 | ENSP00000370611 |
| ENSP00000359518 | ENSP00000374213 |
| ENSP00000359518 | ENSP00000376268 |
| ENSP00000359518 | ENSP00000380054 |
| ENSP00000359518 | ENSP00000385083 |
| ENSP00000359518 | ENSP00000397759 |

|                 |                 |
|-----------------|-----------------|
| ENSP00000359518 | ENSP00000404151 |
| ENSP00000359526 | ENSP00000366482 |
| ENSP00000359526 | ENSP00000367637 |
| ENSP00000359526 | ENSP00000377914 |
| ENSP00000359531 | ENSP00000362171 |
| ENSP00000359531 | ENSP00000362688 |
| ENSP00000359531 | ENSP00000363676 |
| ENSP00000359531 | ENSP00000364119 |
| ENSP00000359531 | ENSP00000364289 |
| ENSP00000359531 | ENSP00000364946 |
| ENSP00000359531 | ENSP00000366915 |
| ENSP00000359531 | ENSP00000369695 |
| ENSP00000359531 | ENSP00000370258 |
| ENSP00000359531 | ENSP00000377640 |
| ENSP00000359531 | ENSP00000377969 |
| ENSP00000359531 | ENSP00000379372 |
| ENSP00000359531 | ENSP00000384597 |
| ENSP00000359531 | ENSP00000386165 |
| ENSP00000359531 | ENSP00000386992 |
| ENSP00000359531 | ENSP00000395535 |
| ENSP00000359531 | ENSP00000403852 |
| ENSP00000359531 | ENSP00000414920 |
| ENSP00000359531 | ENSP00000417229 |
| ENSP00000359552 | ENSP00000360532 |
| ENSP00000359552 | ENSP00000360798 |
| ENSP00000359552 | ENSP00000361699 |
| ENSP00000359552 | ENSP00000364188 |
| ENSP00000359552 | ENSP00000370222 |
| ENSP00000359552 | ENSP00000371475 |
| ENSP00000359552 | ENSP00000378306 |
| ENSP00000359552 | ENSP00000382562 |
| ENSP00000359552 | ENSP00000391723 |
| ENSP00000359552 | ENSP00000394794 |
| ENSP00000359552 | ENSP00000396704 |
| ENSP00000359552 | ENSP00000397351 |
| ENSP00000359552 | ENSP00000414187 |
| ENSP00000359552 | ENSP00000415203 |
| ENSP00000359567 | ENSP00000362068 |
| ENSP00000359567 | ENSP00000367406 |
| ENSP00000359567 | ENSP00000380129 |
| ENSP00000359606 | ENSP00000389591 |
| ENSP00000359634 | ENSP00000361057 |
| ENSP00000359634 | ENSP00000374328 |
| ENSP00000359664 | ENSP00000413625 |
| ENSP00000359680 | ENSP00000382595 |
| ENSP00000359685 | ENSP00000365806 |



|                 |                 |
|-----------------|-----------------|
| ENSP00000359688 | ENSP00000360412 |
| ENSP00000359688 | ENSP00000360828 |
| ENSP00000359688 | ENSP00000361076 |
| ENSP00000359688 | ENSP00000361232 |
| ENSP00000359688 | ENSP00000362153 |
| ENSP00000359688 | ENSP00000363559 |
| ENSP00000359688 | ENSP00000363642 |
| ENSP00000359688 | ENSP00000364320 |
| ENSP00000359688 | ENSP00000365806 |
| ENSP00000359688 | ENSP00000366519 |
| ENSP00000359688 | ENSP00000366557 |
| ENSP00000359688 | ENSP00000368887 |
| ENSP00000359688 | ENSP00000369042 |
| ENSP00000359688 | ENSP00000370589 |
| ENSP00000359688 | ENSP00000371201 |
| ENSP00000359688 | ENSP00000371888 |
| ENSP00000359688 | ENSP00000373090 |
| ENSP00000359688 | ENSP00000377640 |
| ENSP00000359688 | ENSP00000379908 |
| ENSP00000359688 | ENSP00000380982 |
| ENSP00000359688 | ENSP00000382392 |
| ENSP00000359688 | ENSP00000386992 |
| ENSP00000359688 | ENSP00000388464 |
| ENSP00000359688 | ENSP00000389103 |
| ENSP00000359688 | ENSP00000389182 |
| ENSP00000359688 | ENSP00000394290 |
| ENSP00000359688 | ENSP00000402338 |
| ENSP00000359688 | ENSP00000403576 |
| ENSP00000359688 | ENSP00000409074 |
| ENSP00000359688 | ENSP00000409367 |
| ENSP00000359688 | ENSP00000411162 |
| ENSP00000359688 | ENSP00000413152 |
| ENSP00000359688 | ENSP00000419740 |
| ENSP00000359691 | ENSP00000361990 |
| ENSP00000359691 | ENSP00000371546 |
| ENSP00000359691 | ENSP00000373477 |
| ENSP00000359691 | ENSP00000379065 |
| ENSP00000359691 | ENSP00000384434 |
| ENSP00000359691 | ENSP00000385083 |
| ENSP00000359691 | ENSP00000387426 |
| ENSP00000359691 | ENSP00000396068 |
| ENSP00000359699 | ENSP00000366237 |
| ENSP00000359740 | ENSP00000360532 |
| ENSP00000359818 | ENSP00000360262 |
| ENSP00000359818 | ENSP00000362413 |
| ENSP00000359818 | ENSP00000363779 |

|                 |                 |
|-----------------|-----------------|
| ENSP00000359818 | ENSP00000368349 |
| ENSP00000359818 | ENSP00000370460 |
| ENSP00000359818 | ENSP00000371475 |
| ENSP00000359818 | ENSP00000373474 |
| ENSP00000359818 | ENSP00000375809 |
| ENSP00000359818 | ENSP00000387471 |
| ENSP00000359818 | ENSP00000406490 |
| ENSP00000359818 | ENSP00000409275 |
| ENSP00000359837 | ENSP00000361245 |
| ENSP00000359837 | ENSP00000362993 |
| ENSP00000359837 | ENSP00000363308 |
| ENSP00000359837 | ENSP00000369695 |
| ENSP00000359837 | ENSP00000369897 |
| ENSP00000359837 | ENSP00000371451 |
| ENSP00000359837 | ENSP00000377640 |
| ENSP00000359837 | ENSP00000378503 |
| ENSP00000359837 | ENSP00000382595 |
| ENSP00000359837 | ENSP00000384211 |
| ENSP00000359837 | ENSP00000391944 |
| ENSP00000359837 | ENSP00000417281 |
| ENSP00000359848 | ENSP00000360149 |
| ENSP00000359848 | ENSP00000360270 |
| ENSP00000359848 | ENSP00000360644 |
| ENSP00000359848 | ENSP00000361845 |
| ENSP00000359848 | ENSP00000375881 |
| ENSP00000359848 | ENSP00000381293 |
| ENSP00000359848 | ENSP00000397441 |
| ENSP00000359848 | ENSP00000415203 |
| ENSP00000359939 | ENSP00000361076 |
| ENSP00000359939 | ENSP00000361433 |
| ENSP00000359939 | ENSP00000364543 |
| ENSP00000359939 | ENSP00000364813 |
| ENSP00000359939 | ENSP00000365811 |
| ENSP00000359939 | ENSP00000366135 |
| ENSP00000359939 | ENSP00000367721 |
| ENSP00000359939 | ENSP00000368887 |
| ENSP00000359939 | ENSP00000368984 |
| ENSP00000359939 | ENSP00000372827 |
| ENSP00000359939 | ENSP00000372883 |
| ENSP00000359939 | ENSP00000373715 |
| ENSP00000359939 | ENSP00000373918 |
| ENSP00000359939 | ENSP00000377344 |
| ENSP00000359939 | ENSP00000379607 |
| ENSP00000359939 | ENSP00000384651 |
| ENSP00000359939 | ENSP00000394400 |
| ENSP00000359939 | ENSP00000396704 |

|                 |                 |
|-----------------|-----------------|
| ENSP00000359939 | ENSP00000398597 |
| ENSP00000359939 | ENSP00000399530 |
| ENSP00000359939 | ENSP00000400591 |
| ENSP00000359939 | ENSP00000400626 |
| ENSP00000359939 | ENSP00000403345 |
| ENSP00000359939 | ENSP00000406280 |
| ENSP00000359939 | ENSP00000410758 |
| ENSP00000359939 | ENSP00000412310 |
| ENSP00000359939 | ENSP00000412566 |
| ENSP00000359939 | ENSP00000414006 |
| ENSP00000359939 | ENSP00000414634 |
| ENSP00000359958 | ENSP00000370119 |
| ENSP00000359958 | ENSP00000416959 |
| ENSP00000359976 | ENSP00000360147 |
| ENSP00000359976 | ENSP00000361064 |
| ENSP00000359976 | ENSP00000361287 |
| ENSP00000359976 | ENSP00000364486 |
| ENSP00000359976 | ENSP00000365775 |
| ENSP00000359976 | ENSP00000366395 |
| ENSP00000359976 | ENSP00000384675 |
| ENSP00000359988 | ENSP00000364188 |
| ENSP00000359988 | ENSP00000367029 |
| ENSP00000359988 | ENSP00000379607 |
| ENSP00000359988 | ENSP00000382562 |
| ENSP00000359988 | ENSP00000404623 |
| ENSP00000360025 | ENSP00000368438 |
| ENSP00000360025 | ENSP00000375986 |
| ENSP00000360025 | ENSP00000376611 |
| ENSP00000360025 | ENSP00000377944 |
| ENSP00000360025 | ENSP00000381216 |
| ENSP00000360025 | ENSP00000408910 |
| ENSP00000360025 | ENSP00000415316 |
| ENSP00000360031 | ENSP00000360828 |
| ENSP00000360031 | ENSP00000361076 |
| ENSP00000360031 | ENSP00000361982 |
| ENSP00000360031 | ENSP00000362744 |
| ENSP00000360031 | ENSP00000363018 |
| ENSP00000360031 | ENSP00000363642 |
| ENSP00000360031 | ENSP00000363944 |
| ENSP00000360031 | ENSP00000366557 |
| ENSP00000360031 | ENSP00000369162 |
| ENSP00000360031 | ENSP00000369716 |
| ENSP00000360031 | ENSP00000370589 |
| ENSP00000360031 | ENSP00000377747 |
| ENSP00000360031 | ENSP00000378529 |
| ENSP00000360031 | ENSP00000379093 |

|                 |                 |
|-----------------|-----------------|
| ENSP00000360031 | ENSP00000379607 |
| ENSP00000360031 | ENSP00000379888 |
| ENSP00000360031 | ENSP00000380982 |
| ENSP00000360031 | ENSP00000384302 |
| ENSP00000360031 | ENSP00000386717 |
| ENSP00000360031 | ENSP00000387303 |
| ENSP00000360031 | ENSP00000392601 |
| ENSP00000360031 | ENSP00000393953 |
| ENSP00000360031 | ENSP00000398824 |
| ENSP00000360065 | ENSP00000377793 |
| ENSP00000360076 | ENSP00000360798 |
| ENSP00000360076 | ENSP00000370719 |
| ENSP00000360076 | ENSP00000376410 |
| ENSP00000360076 | ENSP00000391249 |
| ENSP00000360076 | ENSP00000397351 |
| ENSP00000360076 | ENSP00000397598 |
| ENSP00000360076 | ENSP00000407879 |
| ENSP00000360112 | ENSP00000386520 |
| ENSP00000360116 | ENSP00000360492 |
| ENSP00000360116 | ENSP00000360497 |
| ENSP00000360116 | ENSP00000362334 |
| ENSP00000360116 | ENSP00000363095 |
| ENSP00000360116 | ENSP00000363779 |
| ENSP00000360116 | ENSP00000364289 |
| ENSP00000360116 | ENSP00000364486 |
| ENSP00000360116 | ENSP00000364929 |
| ENSP00000360116 | ENSP00000366271 |
| ENSP00000360116 | ENSP00000366395 |
| ENSP00000360116 | ENSP00000367527 |
| ENSP00000360116 | ENSP00000368646 |
| ENSP00000360116 | ENSP00000369335 |
| ENSP00000360116 | ENSP00000370150 |
| ENSP00000360116 | ENSP00000370151 |
| ENSP00000360116 | ENSP00000371475 |
| ENSP00000360116 | ENSP00000374213 |
| ENSP00000360116 | ENSP00000375809 |
| ENSP00000360116 | ENSP00000377655 |
| ENSP00000360116 | ENSP00000379217 |
| ENSP00000360116 | ENSP00000380460 |
| ENSP00000360116 | ENSP00000386212 |
| ENSP00000360116 | ENSP00000386759 |
| ENSP00000360116 | ENSP00000389111 |
| ENSP00000360116 | ENSP00000402527 |
| ENSP00000360116 | ENSP00000406293 |
| ENSP00000360116 | ENSP00000417132 |
| ENSP00000360116 | ENSP00000417281 |

|                 |                 |
|-----------------|-----------------|
| ENSP00000360141 | ENSP00000360532 |
| ENSP00000360141 | ENSP00000369757 |
| ENSP00000360141 | ENSP00000381891 |
| ENSP00000360141 | ENSP00000382595 |
| ENSP00000360141 | ENSP00000398789 |
| ENSP00000360141 | ENSP00000417281 |
| ENSP00000360141 | ENSP00000419361 |
| ENSP00000360147 | ENSP00000362576 |
| ENSP00000360147 | ENSP00000370377 |
| ENSP00000360149 | ENSP00000360644 |
| ENSP00000360149 | ENSP00000361625 |
| ENSP00000360149 | ENSP00000361667 |
| ENSP00000360149 | ENSP00000362807 |
| ENSP00000360149 | ENSP00000364188 |
| ENSP00000360149 | ENSP00000380793 |
| ENSP00000360149 | ENSP00000388658 |
| ENSP00000360149 | ENSP00000401445 |
| ENSP00000360149 | ENSP00000415203 |
| ENSP00000360157 | ENSP00000361993 |
| ENSP00000360157 | ENSP00000365735 |
| ENSP00000360183 | ENSP00000360798 |
| ENSP00000360183 | ENSP00000363349 |
| ENSP00000360183 | ENSP00000365840 |
| ENSP00000360183 | ENSP00000366225 |
| ENSP00000360183 | ENSP00000369860 |
| ENSP00000360183 | ENSP00000374529 |
| ENSP00000360183 | ENSP00000375881 |
| ENSP00000360183 | ENSP00000376268 |
| ENSP00000360183 | ENSP00000376410 |
| ENSP00000360183 | ENSP00000377769 |
| ENSP00000360183 | ENSP00000390783 |
| ENSP00000360183 | ENSP00000397351 |
| ENSP00000360183 | ENSP00000397441 |
| ENSP00000360183 | ENSP00000400312 |
| ENSP00000360183 | ENSP00000401435 |
| ENSP00000360183 | ENSP00000402240 |
| ENSP00000360183 | ENSP00000402935 |
| ENSP00000360183 | ENSP00000404247 |
| ENSP00000360183 | ENSP00000415203 |
| ENSP00000360183 | ENSP00000417748 |
| ENSP00000360183 | ENSP00000418661 |
| ENSP00000360215 | ENSP00000362306 |
| ENSP00000360215 | ENSP00000366460 |
| ENSP00000360215 | ENSP00000394757 |
| ENSP00000360216 | ENSP00000361705 |
| ENSP00000360216 | ENSP00000367787 |

|                 |                 |
|-----------------|-----------------|
| ENSP00000360216 | ENSP00000368349 |
| ENSP00000360216 | ENSP00000368438 |
| ENSP00000360216 | ENSP00000396937 |
| ENSP00000360216 | ENSP00000418734 |
| ENSP00000360252 | ENSP00000360532 |
| ENSP00000360252 | ENSP00000369810 |
| ENSP00000360262 | ENSP00000386992 |
| ENSP00000360262 | ENSP00000396452 |
| ENSP00000360268 | ENSP00000360286 |
| ENSP00000360268 | ENSP00000360327 |
| ENSP00000360268 | ENSP00000364035 |
| ENSP00000360268 | ENSP00000365534 |
| ENSP00000360268 | ENSP00000366118 |
| ENSP00000360268 | ENSP00000367079 |
| ENSP00000360268 | ENSP00000368438 |
| ENSP00000360268 | ENSP00000373702 |
| ENSP00000360268 | ENSP00000394649 |
| ENSP00000360268 | ENSP00000406868 |
| ENSP00000360268 | ENSP00000407047 |
| ENSP00000360270 | ENSP00000361042 |
| ENSP00000360286 | ENSP00000361245 |
| ENSP00000360286 | ENSP00000361658 |
| ENSP00000360286 | ENSP00000361949 |
| ENSP00000360286 | ENSP00000362036 |
| ENSP00000360286 | ENSP00000362110 |
| ENSP00000360286 | ENSP00000362413 |
| ENSP00000360286 | ENSP00000363533 |
| ENSP00000360286 | ENSP00000363676 |
| ENSP00000360286 | ENSP00000364293 |
| ENSP00000360286 | ENSP00000365147 |
| ENSP00000360286 | ENSP00000365811 |
| ENSP00000360286 | ENSP00000366557 |
| ENSP00000360286 | ENSP00000367721 |
| ENSP00000360286 | ENSP00000368349 |
| ENSP00000360286 | ENSP00000368612 |
| ENSP00000360286 | ENSP00000368755 |
| ENSP00000360286 | ENSP00000368959 |
| ENSP00000360286 | ENSP00000370508 |
| ENSP00000360286 | ENSP00000371451 |
| ENSP00000360286 | ENSP00000375863 |
| ENSP00000360286 | ENSP00000376946 |
| ENSP00000360286 | ENSP00000377640 |
| ENSP00000360286 | ENSP00000379457 |
| ENSP00000360286 | ENSP00000379607 |
| ENSP00000360286 | ENSP00000379933 |
| ENSP00000360286 | ENSP00000380336 |

|                 |                 |
|-----------------|-----------------|
| ENSP00000360286 | ENSP00000382779 |
| ENSP00000360286 | ENSP00000389934 |
| ENSP00000360286 | ENSP00000404381 |
| ENSP00000360310 | ENSP00000366953 |
| ENSP00000360310 | ENSP00000367841 |
| ENSP00000360310 | ENSP00000369335 |
| ENSP00000360310 | ENSP00000369411 |
| ENSP00000360310 | ENSP00000370151 |
| ENSP00000360310 | ENSP00000372023 |
| ENSP00000360310 | ENSP00000372689 |
| ENSP00000360310 | ENSP00000377384 |
| ENSP00000360310 | ENSP00000389709 |
| ENSP00000360310 | ENSP00000394649 |
| ENSP00000360310 | ENSP00000397830 |
| ENSP00000360310 | ENSP00000402084 |
| ENSP00000360310 | ENSP00000402515 |
| ENSP00000360310 | ENSP00000406868 |
| ENSP00000360310 | ENSP00000414402 |
| ENSP00000360316 | ENSP00000368140 |
| ENSP00000360316 | ENSP00000417281 |
| ENSP00000360323 | ENSP00000396622 |
| ENSP00000360327 | ENSP00000361287 |
| ENSP00000360327 | ENSP00000362576 |
| ENSP00000360327 | ENSP00000367079 |
| ENSP00000360327 | ENSP00000374455 |
| ENSP00000360327 | ENSP00000377527 |
| ENSP00000360327 | ENSP00000377954 |
| ENSP00000360329 | ENSP00000362110 |
| ENSP00000360329 | ENSP00000386621 |
| ENSP00000360329 | ENSP00000406888 |
| ENSP00000360371 | ENSP00000362717 |
| ENSP00000360371 | ENSP00000362948 |
| ENSP00000360371 | ENSP00000367631 |
| ENSP00000360371 | ENSP00000384048 |
| ENSP00000360371 | ENSP00000392466 |
| ENSP00000360412 | ENSP00000360621 |
| ENSP00000360412 | ENSP00000360828 |
| ENSP00000360412 | ENSP00000361076 |
| ENSP00000360412 | ENSP00000361232 |
| ENSP00000360412 | ENSP00000361949 |
| ENSP00000360412 | ENSP00000361982 |
| ENSP00000360412 | ENSP00000362153 |
| ENSP00000360412 | ENSP00000363559 |
| ENSP00000360412 | ENSP00000364320 |
| ENSP00000360412 | ENSP00000365806 |
| ENSP00000360412 | ENSP00000366519 |

|                 |                 |
|-----------------|-----------------|
| ENSP00000360412 | ENSP00000368755 |
| ENSP00000360412 | ENSP00000368887 |
| ENSP00000360412 | ENSP00000370589 |
| ENSP00000360412 | ENSP00000371201 |
| ENSP00000360412 | ENSP00000373090 |
| ENSP00000360412 | ENSP00000376946 |
| ENSP00000360412 | ENSP00000379607 |
| ENSP00000360412 | ENSP00000380495 |
| ENSP00000360412 | ENSP00000380982 |
| ENSP00000360412 | ENSP00000381293 |
| ENSP00000360412 | ENSP00000382392 |
| ENSP00000360412 | ENSP00000387347 |
| ENSP00000360412 | ENSP00000388464 |
| ENSP00000360412 | ENSP00000389103 |
| ENSP00000360412 | ENSP00000394290 |
| ENSP00000360412 | ENSP00000402338 |
| ENSP00000360412 | ENSP00000403576 |
| ENSP00000360412 | ENSP00000409074 |
| ENSP00000360412 | ENSP00000409367 |
| ENSP00000360412 | ENSP00000411162 |
| ENSP00000360412 | ENSP00000413152 |
| ENSP00000360412 | ENSP00000413632 |
| ENSP00000360412 | ENSP00000419740 |
| ENSP00000360437 | ENSP00000387262 |
| ENSP00000360455 | ENSP00000372023 |
| ENSP00000360464 | ENSP00000360488 |
| ENSP00000360473 | ENSP00000361845 |
| ENSP00000360473 | ENSP00000362166 |
| ENSP00000360473 | ENSP00000363313 |
| ENSP00000360473 | ENSP00000363734 |
| ENSP00000360473 | ENSP00000363779 |
| ENSP00000360473 | ENSP00000365025 |
| ENSP00000360473 | ENSP00000366135 |
| ENSP00000360473 | ENSP00000368887 |
| ENSP00000360473 | ENSP00000369736 |
| ENSP00000360473 | ENSP00000369860 |
| ENSP00000360473 | ENSP00000372694 |
| ENSP00000360473 | ENSP00000373399 |
| ENSP00000360473 | ENSP00000374213 |
| ENSP00000360473 | ENSP00000374566 |
| ENSP00000360473 | ENSP00000376268 |
| ENSP00000360473 | ENSP00000376946 |
| ENSP00000360473 | ENSP00000377793 |
| ENSP00000360473 | ENSP00000380460 |
| ENSP00000360473 | ENSP00000382562 |
| ENSP00000360473 | ENSP00000386759 |



|                 |                 |
|-----------------|-----------------|
| ENSP00000360473 | ENSP00000386992 |
| ENSP00000360473 | ENSP00000402240 |
| ENSP00000360473 | ENSP00000412319 |
| ENSP00000360473 | ENSP00000415678 |
| ENSP00000360485 | ENSP00000380702 |
| ENSP00000360488 | ENSP00000362273 |
| ENSP00000360488 | ENSP00000370460 |
| ENSP00000360488 | ENSP00000396301 |
| ENSP00000360497 | ENSP00000360532 |
| ENSP00000360497 | ENSP00000368226 |
| ENSP00000360497 | ENSP00000396301 |
| ENSP00000360497 | ENSP00000404121 |
| ENSP00000360498 | ENSP00000370930 |
| ENSP00000360498 | ENSP00000377486 |
| ENSP00000360498 | ENSP00000417602 |
| ENSP00000360500 | ENSP00000381031 |
| ENSP00000360500 | ENSP00000386394 |
| ENSP00000360515 | ENSP00000361577 |
| ENSP00000360515 | ENSP00000362352 |
| ENSP00000360515 | ENSP00000363193 |
| ENSP00000360515 | ENSP00000363779 |
| ENSP00000360515 | ENSP00000369695 |
| ENSP00000360515 | ENSP00000369716 |
| ENSP00000360515 | ENSP00000374213 |
| ENSP00000360515 | ENSP00000374280 |
| ENSP00000360515 | ENSP00000377747 |
| ENSP00000360515 | ENSP00000377954 |
| ENSP00000360515 | ENSP00000379372 |
| ENSP00000360515 | ENSP00000383503 |
| ENSP00000360515 | ENSP00000384597 |
| ENSP00000360515 | ENSP00000392028 |
| ENSP00000360515 | ENSP00000397259 |
| ENSP00000360515 | ENSP00000397636 |
| ENSP00000360515 | ENSP00000405636 |
| ENSP00000360515 | ENSP00000406293 |
| ENSP00000360515 | ENSP00000410530 |
| ENSP00000360515 | ENSP00000410954 |
| ENSP00000360515 | ENSP00000414110 |
| ENSP00000360515 | ENSP00000416599 |
| ENSP00000360532 | ENSP00000360621 |
| ENSP00000360532 | ENSP00000360828 |
| ENSP00000360532 | ENSP00000361180 |
| ENSP00000360532 | ENSP00000361465 |
| ENSP00000360532 | ENSP00000361824 |
| ENSP00000360532 | ENSP00000362105 |
| ENSP00000360532 | ENSP00000362110 |

|                 |                 |
|-----------------|-----------------|
| ENSP00000360532 | ENSP00000362424 |
| ENSP00000360532 | ENSP00000362592 |
| ENSP00000360532 | ENSP00000362688 |
| ENSP00000360532 | ENSP00000362717 |
| ENSP00000360532 | ENSP00000362900 |
| ENSP00000360532 | ENSP00000363193 |
| ENSP00000360532 | ENSP00000363373 |
| ENSP00000360532 | ENSP00000363779 |
| ENSP00000360532 | ENSP00000363812 |
| ENSP00000360532 | ENSP00000363944 |
| ENSP00000360532 | ENSP00000364893 |
| ENSP00000360532 | ENSP00000364912 |
| ENSP00000360532 | ENSP00000365145 |
| ENSP00000360532 | ENSP00000365439 |
| ENSP00000360532 | ENSP00000366135 |
| ENSP00000360532 | ENSP00000366179 |
| ENSP00000360532 | ENSP00000366519 |
| ENSP00000360532 | ENSP00000366557 |
| ENSP00000360532 | ENSP00000367208 |
| ENSP00000360532 | ENSP00000367263 |
| ENSP00000360532 | ENSP00000367299 |
| ENSP00000360532 | ENSP00000369042 |
| ENSP00000360532 | ENSP00000369218 |
| ENSP00000360532 | ENSP00000369411 |
| ENSP00000360532 | ENSP00000370119 |
| ENSP00000360532 | ENSP00000370150 |
| ENSP00000360532 | ENSP00000370256 |
| ENSP00000360532 | ENSP00000370460 |
| ENSP00000360532 | ENSP00000370517 |
| ENSP00000360532 | ENSP00000370968 |
| ENSP00000360532 | ENSP00000371236 |
| ENSP00000360532 | ENSP00000373301 |
| ENSP00000360532 | ENSP00000376973 |
| ENSP00000360532 | ENSP00000377640 |
| ENSP00000360532 | ENSP00000378180 |
| ENSP00000360532 | ENSP00000378350 |
| ENSP00000360532 | ENSP00000378605 |
| ENSP00000360532 | ENSP00000379457 |
| ENSP00000360532 | ENSP00000379607 |
| ENSP00000360532 | ENSP00000381031 |
| ENSP00000360532 | ENSP00000381293 |
| ENSP00000360532 | ENSP00000381565 |
| ENSP00000360532 | ENSP00000382241 |
| ENSP00000360532 | ENSP00000382392 |
| ENSP00000360532 | ENSP00000382562 |
| ENSP00000360532 | ENSP00000382779 |

|                 |                 |
|-----------------|-----------------|
| ENSP00000360532 | ENSP00000383059 |
| ENSP00000360532 | ENSP00000383145 |
| ENSP00000360532 | ENSP00000385722 |
| ENSP00000360532 | ENSP00000385903 |
| ENSP00000360532 | ENSP00000386717 |
| ENSP00000360532 | ENSP00000387006 |
| ENSP00000360532 | ENSP00000387303 |
| ENSP00000360532 | ENSP00000387593 |
| ENSP00000360532 | ENSP00000388340 |
| ENSP00000360532 | ENSP00000388373 |
| ENSP00000360532 | ENSP00000388464 |
| ENSP00000360532 | ENSP00000389934 |
| ENSP00000360532 | ENSP00000391249 |
| ENSP00000360532 | ENSP00000391723 |
| ENSP00000360532 | ENSP00000392601 |
| ENSP00000360532 | ENSP00000393953 |
| ENSP00000360532 | ENSP00000394316 |
| ENSP00000360532 | ENSP00000394394 |
| ENSP00000360532 | ENSP00000394869 |
| ENSP00000360532 | ENSP00000396103 |
| ENSP00000360532 | ENSP00000396937 |
| ENSP00000360532 | ENSP00000400591 |
| ENSP00000360532 | ENSP00000406490 |
| ENSP00000360532 | ENSP00000407487 |
| ENSP00000360532 | ENSP00000408910 |
| ENSP00000360532 | ENSP00000412553 |
| ENSP00000360532 | ENSP00000412566 |
| ENSP00000360532 | ENSP00000417980 |
| ENSP00000360532 | ENSP00000419851 |
| ENSP00000360540 | ENSP00000366565 |
| ENSP00000360569 | ENSP00000407401 |
| ENSP00000360621 | ENSP00000360828 |
| ENSP00000360621 | ENSP00000362352 |
| ENSP00000360621 | ENSP00000362592 |
| ENSP00000360621 | ENSP00000362993 |
| ENSP00000360621 | ENSP00000363021 |
| ENSP00000360621 | ENSP00000364119 |
| ENSP00000360621 | ENSP00000365588 |
| ENSP00000360621 | ENSP00000365811 |
| ENSP00000360621 | ENSP00000366271 |
| ENSP00000360621 | ENSP00000366395 |
| ENSP00000360621 | ENSP00000366953 |
| ENSP00000360621 | ENSP00000366974 |
| ENSP00000360621 | ENSP00000367034 |
| ENSP00000360621 | ENSP00000369411 |
| ENSP00000360621 | ENSP00000370151 |

|                 |                 |
|-----------------|-----------------|
| ENSP00000360621 | ENSP00000371475 |
| ENSP00000360621 | ENSP00000372023 |
| ENSP00000360621 | ENSP00000373060 |
| ENSP00000360621 | ENSP00000381657 |
| ENSP00000360621 | ENSP00000383986 |
| ENSP00000360621 | ENSP00000384048 |
| ENSP00000360621 | ENSP00000387429 |
| ENSP00000360621 | ENSP00000387982 |
| ENSP00000360621 | ENSP00000391723 |
| ENSP00000360621 | ENSP00000392617 |
| ENSP00000360621 | ENSP00000396484 |
| ENSP00000360621 | ENSP00000402084 |
| ENSP00000360621 | ENSP00000402338 |
| ENSP00000360621 | ENSP00000402515 |
| ENSP00000360621 | ENSP00000404318 |
| ENSP00000360621 | ENSP00000409167 |
| ENSP00000360621 | ENSP00000415212 |
| ENSP00000360621 | ENSP00000416511 |
| ENSP00000360621 | ENSP00000418111 |
| ENSP00000360621 | ENSP00000420588 |
| ENSP00000360644 | ENSP00000364188 |
| ENSP00000360644 | ENSP00000364847 |
| ENSP00000360644 | ENSP00000380793 |
| ENSP00000360644 | ENSP00000386918 |
| ENSP00000360644 | ENSP00000401445 |
| ENSP00000360644 | ENSP00000402338 |
| ENSP00000360644 | ENSP00000415203 |
| ENSP00000360660 | ENSP00000365439 |
| ENSP00000360676 | ENSP00000363779 |
| ENSP00000360730 | ENSP00000362424 |
| ENSP00000360777 | ENSP00000363985 |
| ENSP00000360777 | ENSP00000377148 |
| ENSP00000360782 | ENSP00000361042 |
| ENSP00000360782 | ENSP00000361433 |
| ENSP00000360782 | ENSP00000361949 |
| ENSP00000360782 | ENSP00000363708 |
| ENSP00000360782 | ENSP00000365766 |
| ENSP00000360782 | ENSP00000366800 |
| ENSP00000360782 | ENSP00000373404 |
| ENSP00000360782 | ENSP00000392985 |
| ENSP00000360798 | ENSP00000365891 |
| ENSP00000360798 | ENSP00000369695 |
| ENSP00000360798 | ENSP00000370719 |
| ENSP00000360798 | ENSP00000381567 |
| ENSP00000360798 | ENSP00000386722 |
| ENSP00000360798 | ENSP00000386878 |

|                 |                 |
|-----------------|-----------------|
| ENSP00000360798 | ENSP00000388340 |
| ENSP00000360798 | ENSP00000397598 |
| ENSP00000360798 | ENSP00000408910 |
| ENSP00000360798 | ENSP00000413625 |
| ENSP00000360798 | ENSP00000417281 |
| ENSP00000360803 | ENSP00000370151 |
| ENSP00000360817 | ENSP00000362306 |
| ENSP00000360817 | ENSP00000363021 |
| ENSP00000360817 | ENSP00000369335 |
| ENSP00000360817 | ENSP00000370150 |
| ENSP00000360821 | ENSP00000391774 |
| ENSP00000360828 | ENSP00000361076 |
| ENSP00000360828 | ENSP00000361465 |
| ENSP00000360828 | ENSP00000363018 |
| ENSP00000360828 | ENSP00000363559 |
| ENSP00000360828 | ENSP00000364320 |
| ENSP00000360828 | ENSP00000366135 |
| ENSP00000360828 | ENSP00000366519 |
| ENSP00000360828 | ENSP00000368612 |
| ENSP00000360828 | ENSP00000368887 |
| ENSP00000360828 | ENSP00000370589 |
| ENSP00000360828 | ENSP00000371101 |
| ENSP00000360828 | ENSP00000372199 |
| ENSP00000360828 | ENSP00000379607 |
| ENSP00000360828 | ENSP00000380982 |
| ENSP00000360828 | ENSP00000382392 |
| ENSP00000360828 | ENSP00000389103 |
| ENSP00000360828 | ENSP00000402338 |
| ENSP00000360876 | ENSP00000361949 |
| ENSP00000360876 | ENSP00000362820 |
| ENSP00000360876 | ENSP00000373952 |
| ENSP00000360876 | ENSP00000376309 |
| ENSP00000360876 | ENSP00000400591 |
| ENSP00000360876 | ENSP00000404121 |
| ENSP00000360899 | ENSP00000401397 |
| ENSP00000360916 | ENSP00000362110 |
| ENSP00000360916 | ENSP00000363763 |
| ENSP00000360916 | ENSP00000364898 |
| ENSP00000360916 | ENSP00000371451 |
| ENSP00000360916 | ENSP00000377262 |
| ENSP00000360916 | ENSP00000377665 |
| ENSP00000360916 | ENSP00000378736 |
| ENSP00000360916 | ENSP00000379183 |
| ENSP00000360916 | ENSP00000380921 |
| ENSP00000360916 | ENSP00000387128 |
| ENSP00000360916 | ENSP00000393596 |

|                 |                 |
|-----------------|-----------------|
| ENSP00000360916 | ENSP00000394316 |
| ENSP00000360916 | ENSP00000399588 |
| ENSP00000360916 | ENSP00000415363 |
| ENSP00000360918 | ENSP00000371236 |
| ENSP00000360918 | ENSP00000379430 |
| ENSP00000360918 | ENSP00000386284 |
| ENSP00000360922 | ENSP00000361076 |
| ENSP00000360922 | ENSP00000362744 |
| ENSP00000360922 | ENSP00000364289 |
| ENSP00000360922 | ENSP00000369757 |
| ENSP00000360922 | ENSP00000379607 |
| ENSP00000360922 | ENSP00000379888 |
| ENSP00000360922 | ENSP00000393275 |
| ENSP00000360922 | ENSP00000404121 |
| ENSP00000360938 | ENSP00000374280 |
| ENSP00000360992 | ENSP00000384211 |
| ENSP00000360992 | ENSP00000388340 |
| ENSP00000360992 | ENSP00000401508 |
| ENSP00000360992 | ENSP00000417748 |
| ENSP00000361005 | ENSP00000417190 |
| ENSP00000361009 | ENSP00000370719 |
| ENSP00000361009 | ENSP00000380450 |
| ENSP00000361009 | ENSP00000394316 |
| ENSP00000361009 | ENSP00000402084 |
| ENSP00000361010 | ENSP00000368438 |
| ENSP00000361010 | ENSP00000370589 |
| ENSP00000361010 | ENSP00000374390 |
| ENSP00000361014 | ENSP00000365439 |
| ENSP00000361014 | ENSP00000373952 |
| ENSP00000361027 | ENSP00000361467 |
| ENSP00000361027 | ENSP00000366434 |
| ENSP00000361027 | ENSP00000370410 |
| ENSP00000361032 | ENSP00000379607 |
| ENSP00000361042 | ENSP00000361845 |
| ENSP00000361042 | ENSP00000365243 |
| ENSP00000361042 | ENSP00000386759 |
| ENSP00000361042 | ENSP00000387262 |
| ENSP00000361042 | ENSP00000388658 |
| ENSP00000361048 | ENSP00000368931 |
| ENSP00000361057 | ENSP00000361686 |
| ENSP00000361057 | ENSP00000364188 |
| ENSP00000361057 | ENSP00000364295 |
| ENSP00000361057 | ENSP00000366395 |
| ENSP00000361057 | ENSP00000368468 |
| ENSP00000361057 | ENSP00000370414 |
| ENSP00000361057 | ENSP00000374328 |

|                 |                 |
|-----------------|-----------------|
| ENSP00000361057 | ENSP00000377401 |
| ENSP00000361057 | ENSP00000386918 |
| ENSP00000361057 | ENSP00000392330 |
| ENSP00000361057 | ENSP00000401445 |
| ENSP00000361064 | ENSP00000362717 |
| ENSP00000361064 | ENSP00000363046 |
| ENSP00000361064 | ENSP00000367407 |
| ENSP00000361064 | ENSP00000368305 |
| ENSP00000361064 | ENSP00000384675 |
| ENSP00000361076 | ENSP00000361982 |
| ENSP00000361076 | ENSP00000362153 |
| ENSP00000361076 | ENSP00000362744 |
| ENSP00000361076 | ENSP00000363018 |
| ENSP00000361076 | ENSP00000363384 |
| ENSP00000361076 | ENSP00000363559 |
| ENSP00000361076 | ENSP00000363676 |
| ENSP00000361076 | ENSP00000363944 |
| ENSP00000361076 | ENSP00000364320 |
| ENSP00000361076 | ENSP00000364524 |
| ENSP00000361076 | ENSP00000364543 |
| ENSP00000361076 | ENSP00000366519 |
| ENSP00000361076 | ENSP00000369757 |
| ENSP00000361076 | ENSP00000372827 |
| ENSP00000361076 | ENSP00000373404 |
| ENSP00000361076 | ENSP00000374390 |
| ENSP00000361076 | ENSP00000375730 |
| ENSP00000361076 | ENSP00000377640 |
| ENSP00000361076 | ENSP00000377865 |
| ENSP00000361076 | ENSP00000378160 |
| ENSP00000361076 | ENSP00000379607 |
| ENSP00000361076 | ENSP00000379888 |
| ENSP00000361076 | ENSP00000380156 |
| ENSP00000361076 | ENSP00000380982 |
| ENSP00000361076 | ENSP00000382392 |
| ENSP00000361076 | ENSP00000386717 |
| ENSP00000361076 | ENSP00000389103 |
| ENSP00000361076 | ENSP00000392859 |
| ENSP00000361076 | ENSP00000393241 |
| ENSP00000361076 | ENSP00000393393 |
| ENSP00000361076 | ENSP00000394400 |
| ENSP00000361076 | ENSP00000398597 |
| ENSP00000361076 | ENSP00000399530 |
| ENSP00000361076 | ENSP00000400626 |
| ENSP00000361076 | ENSP00000402338 |
| ENSP00000361076 | ENSP00000403175 |
| ENSP00000361076 | ENSP00000408058 |

|                 |                 |
|-----------------|-----------------|
| ENSP00000361076 | ENSP00000412310 |
| ENSP00000361076 | ENSP00000412583 |
| ENSP00000361076 | ENSP00000414321 |
| ENSP00000361076 | ENSP00000416110 |
| ENSP00000361084 | ENSP00000399511 |
| ENSP00000361092 | ENSP00000362105 |
| ENSP00000361092 | ENSP00000368887 |
| ENSP00000361092 | ENSP00000381698 |
| ENSP00000361120 | ENSP00000383623 |
| ENSP00000361141 | ENSP00000370410 |
| ENSP00000361162 | ENSP00000396301 |
| ENSP00000361180 | ENSP00000361219 |
| ENSP00000361180 | ENSP00000364794 |
| ENSP00000361180 | ENSP00000369100 |
| ENSP00000361180 | ENSP00000371155 |
| ENSP00000361180 | ENSP00000376534 |
| ENSP00000361186 | ENSP00000386227 |
| ENSP00000361202 | ENSP00000364204 |
| ENSP00000361202 | ENSP00000373700 |
| ENSP00000361202 | ENSP00000378368 |
| ENSP00000361202 | ENSP00000383431 |
| ENSP00000361202 | ENSP00000417281 |
| ENSP00000361206 | ENSP00000362036 |
| ENSP00000361206 | ENSP00000362208 |
| ENSP00000361206 | ENSP00000372445 |
| ENSP00000361206 | ENSP00000393241 |
| ENSP00000361206 | ENSP00000403175 |
| ENSP00000361206 | ENSP00000416110 |
| ENSP00000361207 | ENSP00000361686 |
| ENSP00000361219 | ENSP00000366828 |
| ENSP00000361232 | ENSP00000361465 |
| ENSP00000361232 | ENSP00000362153 |
| ENSP00000361232 | ENSP00000363559 |
| ENSP00000361232 | ENSP00000366135 |
| ENSP00000361232 | ENSP00000366519 |
| ENSP00000361232 | ENSP00000368887 |
| ENSP00000361232 | ENSP00000371101 |
| ENSP00000361232 | ENSP00000372199 |
| ENSP00000361232 | ENSP00000374390 |
| ENSP00000361232 | ENSP00000380495 |
| ENSP00000361232 | ENSP00000380982 |
| ENSP00000361232 | ENSP00000382392 |
| ENSP00000361232 | ENSP00000402338 |
| ENSP00000361245 | ENSP00000366135 |
| ENSP00000361245 | ENSP00000366179 |
| ENSP00000361245 | ENSP00000368565 |



|                 |                 |
|-----------------|-----------------|
| ENSP00000361245 | ENSP00000372023 |
| ENSP00000361245 | ENSP00000384312 |
| ENSP00000361245 | ENSP00000387170 |
| ENSP00000361245 | ENSP00000401980 |
| ENSP00000361287 | ENSP00000364320 |
| ENSP00000361287 | ENSP00000365534 |
| ENSP00000361287 | ENSP00000366974 |
| ENSP00000361287 | ENSP00000368612 |
| ENSP00000361287 | ENSP00000370517 |
| ENSP00000361287 | ENSP00000373082 |
| ENSP00000361287 | ENSP00000376946 |
| ENSP00000361287 | ENSP00000384490 |
| ENSP00000361287 | ENSP00000388872 |
| ENSP00000361287 | ENSP00000389065 |
| ENSP00000361287 | ENSP00000396704 |
| ENSP00000361287 | ENSP00000411327 |
| ENSP00000361287 | ENSP00000412553 |
| ENSP00000361287 | ENSP00000413319 |
| ENSP00000361287 | ENSP00000414373 |
| ENSP00000361310 | ENSP00000364270 |
| ENSP00000361310 | ENSP00000368438 |
| ENSP00000361310 | ENSP00000369335 |
| ENSP00000361310 | ENSP00000370150 |
| ENSP00000361310 | ENSP00000370222 |
| ENSP00000361310 | ENSP00000372023 |
| ENSP00000361310 | ENSP00000372316 |
| ENSP00000361310 | ENSP00000381657 |
| ENSP00000361310 | ENSP00000394649 |
| ENSP00000361310 | ENSP00000406490 |
| ENSP00000361310 | ENSP00000406868 |
| ENSP00000361405 | ENSP00000363763 |
| ENSP00000361405 | ENSP00000367202 |
| ENSP00000361405 | ENSP00000381891 |
| ENSP00000361418 | ENSP00000362820 |
| ENSP00000361418 | ENSP00000368226 |
| ENSP00000361418 | ENSP00000368927 |
| ENSP00000361418 | ENSP00000369335 |
| ENSP00000361418 | ENSP00000370258 |
| ENSP00000361418 | ENSP00000379372 |
| ENSP00000361418 | ENSP00000384597 |
| ENSP00000361433 | ENSP00000362578 |
| ENSP00000361433 | ENSP00000365811 |
| ENSP00000361433 | ENSP00000366135 |
| ENSP00000361433 | ENSP00000366953 |
| ENSP00000361433 | ENSP00000368984 |
| ENSP00000361433 | ENSP00000379607 |

|                 |                 |
|-----------------|-----------------|
| ENSP00000361433 | ENSP00000381216 |
| ENSP00000361433 | ENSP00000384302 |
| ENSP00000361433 | ENSP00000398597 |
| ENSP00000361465 | ENSP00000361982 |
| ENSP00000361465 | ENSP00000362441 |
| ENSP00000361465 | ENSP00000363018 |
| ENSP00000361465 | ENSP00000363676 |
| ENSP00000361465 | ENSP00000363779 |
| ENSP00000361465 | ENSP00000366135 |
| ENSP00000361465 | ENSP00000366828 |
| ENSP00000361465 | ENSP00000366974 |
| ENSP00000361465 | ENSP00000367029 |
| ENSP00000361465 | ENSP00000367034 |
| ENSP00000361465 | ENSP00000368927 |
| ENSP00000361465 | ENSP00000369162 |
| ENSP00000361465 | ENSP00000369695 |
| ENSP00000361465 | ENSP00000370589 |
| ENSP00000361465 | ENSP00000376946 |
| ENSP00000361465 | ENSP00000378736 |
| ENSP00000361465 | ENSP00000380271 |
| ENSP00000361465 | ENSP00000380495 |
| ENSP00000361465 | ENSP00000383503 |
| ENSP00000361465 | ENSP00000384312 |
| ENSP00000361465 | ENSP00000389103 |
| ENSP00000361465 | ENSP00000396452 |
| ENSP00000361465 | ENSP00000397598 |
| ENSP00000361465 | ENSP00000397636 |
| ENSP00000361465 | ENSP00000403852 |
| ENSP00000361465 | ENSP00000405636 |
| ENSP00000361465 | ENSP00000406490 |
| ENSP00000361465 | ENSP00000410530 |
| ENSP00000361465 | ENSP00000410954 |
| ENSP00000361465 | ENSP00000414110 |
| ENSP00000361465 | ENSP00000416599 |
| ENSP00000361467 | ENSP00000382064 |
| ENSP00000361486 | ENSP00000370421 |
| ENSP00000361524 | ENSP00000386722 |
| ENSP00000361547 | ENSP00000372023 |
| ENSP00000361548 | ENSP00000365016 |
| ENSP00000361554 | ENSP00000371347 |
| ENSP00000361554 | ENSP00000415151 |
| ENSP00000361557 | ENSP00000362110 |
| ENSP00000361557 | ENSP00000365439 |
| ENSP00000361577 | ENSP00000362900 |
| ENSP00000361577 | ENSP00000363313 |
| ENSP00000361577 | ENSP00000366557 |

|                 |                 |
|-----------------|-----------------|
| ENSP00000361577 | ENSP00000366843 |
| ENSP00000361577 | ENSP00000370460 |
| ENSP00000361577 | ENSP00000370589 |
| ENSP00000361577 | ENSP00000376973 |
| ENSP00000361577 | ENSP00000387006 |
| ENSP00000361577 | ENSP00000400591 |
| ENSP00000361577 | ENSP00000412566 |
| ENSP00000361616 | ENSP00000367406 |
| ENSP00000361616 | ENSP00000377914 |
| ENSP00000361625 | ENSP00000402240 |
| ENSP00000361640 | ENSP00000362413 |
| ENSP00000361640 | ENSP00000373566 |
| ENSP00000361640 | ENSP00000380921 |
| ENSP00000361642 | ENSP00000365025 |
| ENSP00000361642 | ENSP00000374280 |
| ENSP00000361667 | ENSP00000376268 |
| ENSP00000361669 | ENSP00000372023 |
| ENSP00000361686 | ENSP00000363591 |
| ENSP00000361686 | ENSP00000364486 |
| ENSP00000361686 | ENSP00000365243 |
| ENSP00000361686 | ENSP00000368140 |
| ENSP00000361686 | ENSP00000377040 |
| ENSP00000361686 | ENSP00000387262 |
| ENSP00000361686 | ENSP00000389649 |
| ENSP00000361686 | ENSP00000392330 |
| ENSP00000361699 | ENSP00000369757 |
| ENSP00000361699 | ENSP00000373918 |
| ENSP00000361699 | ENSP00000379607 |
| ENSP00000361699 | ENSP00000386621 |
| ENSP00000361699 | ENSP00000388872 |
| ENSP00000361699 | ENSP00000418734 |
| ENSP00000361705 | ENSP00000362013 |
| ENSP00000361705 | ENSP00000417281 |
| ENSP00000361707 | ENSP00000368438 |
| ENSP00000361707 | ENSP00000419851 |
| ENSP00000361721 | ENSP00000377265 |
| ENSP00000361748 | ENSP00000363812 |
| ENSP00000361800 | ENSP00000377793 |
| ENSP00000361824 | ENSP00000367910 |
| ENSP00000361824 | ENSP00000373952 |
| ENSP00000361824 | ENSP00000374455 |
| ENSP00000361824 | ENSP00000377372 |
| ENSP00000361824 | ENSP00000379607 |
| ENSP00000361824 | ENSP00000384675 |
| ENSP00000361845 | ENSP00000364188 |
| ENSP00000361845 | ENSP00000366249 |

|                 |                 |
|-----------------|-----------------|
| ENSP00000361845 | ENSP00000368699 |
| ENSP00000361845 | ENSP00000370372 |
| ENSP00000361845 | ENSP00000373039 |
| ENSP00000361845 | ENSP00000396152 |
| ENSP00000361845 | ENSP00000401445 |
| ENSP00000361845 | ENSP00000410416 |
| ENSP00000361845 | ENSP00000415203 |
| ENSP00000361875 | ENSP00000372689 |
| ENSP00000361894 | ENSP00000386394 |
| ENSP00000361949 | ENSP00000362110 |
| ENSP00000361949 | ENSP00000362306 |
| ENSP00000361949 | ENSP00000362688 |
| ENSP00000361949 | ENSP00000362936 |
| ENSP00000361949 | ENSP00000362993 |
| ENSP00000361949 | ENSP00000363559 |
| ENSP00000361949 | ENSP00000364289 |
| ENSP00000361949 | ENSP00000366135 |
| ENSP00000361949 | ENSP00000369042 |
| ENSP00000361949 | ENSP00000379607 |
| ENSP00000361949 | ENSP00000380921 |
| ENSP00000361949 | ENSP00000391723 |
| ENSP00000361949 | ENSP00000412566 |
| ENSP00000361949 | ENSP00000417229 |
| ENSP00000361965 | ENSP00000365773 |
| ENSP00000361965 | ENSP00000367615 |
| ENSP00000361965 | ENSP00000368699 |
| ENSP00000361965 | ENSP00000396704 |
| ENSP00000361982 | ENSP00000362153 |
| ENSP00000361982 | ENSP00000362744 |
| ENSP00000361982 | ENSP00000363559 |
| ENSP00000361982 | ENSP00000363944 |
| ENSP00000361982 | ENSP00000364289 |
| ENSP00000361982 | ENSP00000365806 |
| ENSP00000361982 | ENSP00000365837 |
| ENSP00000361982 | ENSP00000366135 |
| ENSP00000361982 | ENSP00000366557 |
| ENSP00000361982 | ENSP00000367029 |
| ENSP00000361982 | ENSP00000368589 |
| ENSP00000361982 | ENSP00000370258 |
| ENSP00000361982 | ENSP00000370589 |
| ENSP00000361982 | ENSP00000370741 |
| ENSP00000361982 | ENSP00000373090 |
| ENSP00000361982 | ENSP00000374280 |
| ENSP00000361982 | ENSP00000379888 |
| ENSP00000361982 | ENSP00000380129 |
| ENSP00000361982 | ENSP00000380982 |

|                 |                 |
|-----------------|-----------------|
| ENSP00000361982 | ENSP00000394290 |
| ENSP00000361982 | ENSP00000396704 |
| ENSP00000361982 | ENSP00000403576 |
| ENSP00000361982 | ENSP00000409074 |
| ENSP00000361982 | ENSP00000409367 |
| ENSP00000361982 | ENSP00000411162 |
| ENSP00000361982 | ENSP00000417229 |
| ENSP00000361990 | ENSP00000364289 |
| ENSP00000361990 | ENSP00000364946 |
| ENSP00000361990 | ENSP00000369335 |
| ENSP00000361990 | ENSP00000376445 |
| ENSP00000361990 | ENSP00000378132 |
| ENSP00000361990 | ENSP00000378624 |
| ENSP00000361990 | ENSP00000379457 |
| ENSP00000361990 | ENSP00000382269 |
| ENSP00000361990 | ENSP00000386212 |
| ENSP00000361990 | ENSP00000417085 |
| ENSP00000361993 | ENSP00000365766 |
| ENSP00000361993 | ENSP00000366620 |
| ENSP00000361993 | ENSP00000366746 |
| ENSP00000361998 | ENSP00000369695 |
| ENSP00000362021 | ENSP00000371308 |
| ENSP00000362029 | ENSP00000380921 |
| ENSP00000362029 | ENSP00000404658 |
| ENSP00000362036 | ENSP00000362208 |
| ENSP00000362036 | ENSP00000362576 |
| ENSP00000362036 | ENSP00000363384 |
| ENSP00000362036 | ENSP00000364320 |
| ENSP00000362036 | ENSP00000368790 |
| ENSP00000362036 | ENSP00000368927 |
| ENSP00000362036 | ENSP00000370023 |
| ENSP00000362036 | ENSP00000372445 |
| ENSP00000362036 | ENSP00000378326 |
| ENSP00000362036 | ENSP00000379339 |
| ENSP00000362036 | ENSP00000382250 |
| ENSP00000362036 | ENSP00000393241 |
| ENSP00000362036 | ENSP00000399511 |
| ENSP00000362036 | ENSP00000403175 |
| ENSP00000362036 | ENSP00000412583 |
| ENSP00000362036 | ENSP00000416110 |
| ENSP00000362036 | ENSP00000420714 |
| ENSP00000362041 | ENSP00000362110 |
| ENSP00000362041 | ENSP00000368565 |
| ENSP00000362041 | ENSP00000370589 |
| ENSP00000362041 | ENSP00000379607 |
| ENSP00000362068 | ENSP00000367406 |

|                 |                 |
|-----------------|-----------------|
| ENSP00000362068 | ENSP00000369695 |
| ENSP00000362105 | ENSP00000366135 |
| ENSP00000362105 | ENSP00000370589 |
| ENSP00000362105 | ENSP00000402338 |
| ENSP00000362110 | ENSP00000362153 |
| ENSP00000362110 | ENSP00000362900 |
| ENSP00000362110 | ENSP00000362936 |
| ENSP00000362110 | ENSP00000363313 |
| ENSP00000362110 | ENSP00000364289 |
| ENSP00000362110 | ENSP00000364813 |
| ENSP00000362110 | ENSP00000366179 |
| ENSP00000362110 | ENSP00000366557 |
| ENSP00000362110 | ENSP00000368523 |
| ENSP00000362110 | ENSP00000368801 |
| ENSP00000362110 | ENSP00000370589 |
| ENSP00000362110 | ENSP00000371451 |
| ENSP00000362110 | ENSP00000372883 |
| ENSP00000362110 | ENSP00000378350 |
| ENSP00000362110 | ENSP00000391432 |
| ENSP00000362110 | ENSP00000400591 |
| ENSP00000362110 | ENSP00000403345 |
| ENSP00000362110 | ENSP00000406280 |
| ENSP00000362110 | ENSP00000412566 |
| ENSP00000362110 | ENSP00000414006 |
| ENSP00000362110 | ENSP00000414634 |
| ENSP00000362110 | ENSP00000416959 |
| ENSP00000362110 | ENSP00000417451 |
| ENSP00000362110 | ENSP00000420195 |
| ENSP00000362115 | ENSP00000363985 |
| ENSP00000362115 | ENSP00000377148 |
| ENSP00000362135 | ENSP00000371475 |
| ENSP00000362135 | ENSP00000381657 |
| ENSP00000362153 | ENSP00000363384 |
| ENSP00000362153 | ENSP00000363559 |
| ENSP00000362153 | ENSP00000363676 |
| ENSP00000362153 | ENSP00000364037 |
| ENSP00000362153 | ENSP00000364119 |
| ENSP00000362153 | ENSP00000364320 |
| ENSP00000362153 | ENSP00000366519 |
| ENSP00000362153 | ENSP00000368612 |
| ENSP00000362153 | ENSP00000370589 |
| ENSP00000362153 | ENSP00000371451 |
| ENSP00000362153 | ENSP00000372689 |
| ENSP00000362153 | ENSP00000377640 |
| ENSP00000362153 | ENSP00000379888 |
| ENSP00000362153 | ENSP00000380982 |

|                 |                 |
|-----------------|-----------------|
| ENSP00000362153 | ENSP00000382392 |
| ENSP00000362153 | ENSP00000389103 |
| ENSP00000362153 | ENSP00000397598 |
| ENSP00000362153 | ENSP00000402338 |
| ENSP00000362153 | ENSP00000417281 |
| ENSP00000362153 | ENSP00000419740 |
| ENSP00000362166 | ENSP00000369695 |
| ENSP00000362166 | ENSP00000373340 |
| ENSP00000362166 | ENSP00000374213 |
| ENSP00000362171 | ENSP00000364591 |
| ENSP00000362171 | ENSP00000367766 |
| ENSP00000362171 | ENSP00000369757 |
| ENSP00000362171 | ENSP00000380129 |
| ENSP00000362171 | ENSP00000390948 |
| ENSP00000362171 | ENSP00000402084 |
| ENSP00000362208 | ENSP00000372445 |
| ENSP00000362255 | ENSP00000367615 |
| ENSP00000362282 | ENSP00000396704 |
| ENSP00000362298 | ENSP00000402240 |
| ENSP00000362306 | ENSP00000363676 |
| ENSP00000362306 | ENSP00000365877 |
| ENSP00000362306 | ENSP00000366135 |
| ENSP00000362306 | ENSP00000366829 |
| ENSP00000362306 | ENSP00000366843 |
| ENSP00000362306 | ENSP00000367923 |
| ENSP00000362306 | ENSP00000377640 |
| ENSP00000362306 | ENSP00000377865 |
| ENSP00000362306 | ENSP00000379144 |
| ENSP00000362306 | ENSP00000380702 |
| ENSP00000362306 | ENSP00000380718 |
| ENSP00000362306 | ENSP00000381216 |
| ENSP00000362306 | ENSP00000391774 |
| ENSP00000362306 | ENSP00000403175 |
| ENSP00000362306 | ENSP00000416110 |
| ENSP00000362314 | ENSP00000371888 |
| ENSP00000362314 | ENSP00000402515 |
| ENSP00000362334 | ENSP00000368305 |
| ENSP00000362334 | ENSP00000369335 |
| ENSP00000362334 | ENSP00000369531 |
| ENSP00000362334 | ENSP00000370222 |
| ENSP00000362334 | ENSP00000374280 |
| ENSP00000362334 | ENSP00000379217 |
| ENSP00000362334 | ENSP00000384211 |
| ENSP00000362334 | ENSP00000390783 |
| ENSP00000362334 | ENSP00000396937 |
| ENSP00000362334 | ENSP00000401371 |

|                 |                 |
|-----------------|-----------------|
| ENSP00000362334 | ENSP00000403852 |
| ENSP00000362334 | ENSP00000417748 |
| ENSP00000362334 | ENSP00000418734 |
| ENSP00000362352 | ENSP00000374213 |
| ENSP00000362352 | ENSP00000374280 |
| ENSP00000362352 | ENSP00000377793 |
| ENSP00000362352 | ENSP00000396704 |
| ENSP00000362399 | ENSP00000365630 |
| ENSP00000362399 | ENSP00000366225 |
| ENSP00000362399 | ENSP00000367408 |
| ENSP00000362399 | ENSP00000369409 |
| ENSP00000362399 | ENSP00000376268 |
| ENSP00000362399 | ENSP00000381293 |
| ENSP00000362399 | ENSP00000389934 |
| ENSP00000362413 | ENSP00000362424 |
| ENSP00000362413 | ENSP00000362688 |
| ENSP00000362413 | ENSP00000363308 |
| ENSP00000362413 | ENSP00000363873 |
| ENSP00000362413 | ENSP00000364813 |
| ENSP00000362413 | ENSP00000371888 |
| ENSP00000362413 | ENSP00000372883 |
| ENSP00000362413 | ENSP00000379607 |
| ENSP00000362413 | ENSP00000380504 |
| ENSP00000362413 | ENSP00000382595 |
| ENSP00000362413 | ENSP00000392270 |
| ENSP00000362413 | ENSP00000392330 |
| ENSP00000362413 | ENSP00000393953 |
| ENSP00000362413 | ENSP00000402338 |
| ENSP00000362413 | ENSP00000403345 |
| ENSP00000362413 | ENSP00000406280 |
| ENSP00000362413 | ENSP00000406490 |
| ENSP00000362413 | ENSP00000410758 |
| ENSP00000362413 | ENSP00000414006 |
| ENSP00000362413 | ENSP00000414634 |
| ENSP00000362424 | ENSP00000365477 |
| ENSP00000362424 | ENSP00000377640 |
| ENSP00000362441 | ENSP00000364524 |
| ENSP00000362441 | ENSP00000369335 |
| ENSP00000362441 | ENSP00000370616 |
| ENSP00000362441 | ENSP00000395535 |
| ENSP00000362441 | ENSP00000396876 |
| ENSP00000362441 | ENSP00000408020 |
| ENSP00000362456 | ENSP00000403817 |
| ENSP00000362463 | ENSP00000397009 |
| ENSP00000362532 | ENSP00000363313 |
| ENSP00000362532 | ENSP00000365811 |



|                 |                 |
|-----------------|-----------------|
| ENSP00000362532 | ENSP00000366607 |
| ENSP00000362532 | ENSP00000389934 |
| ENSP00000362546 | ENSP00000376097 |
| ENSP00000362546 | ENSP00000388340 |
| ENSP00000362546 | ENSP00000402515 |
| ENSP00000362576 | ENSP00000363559 |
| ENSP00000362576 | ENSP00000363779 |
| ENSP00000362576 | ENSP00000364320 |
| ENSP00000362576 | ENSP00000364794 |
| ENSP00000362576 | ENSP00000364815 |
| ENSP00000362576 | ENSP00000365837 |
| ENSP00000362576 | ENSP00000369335 |
| ENSP00000362576 | ENSP00000369757 |
| ENSP00000362576 | ENSP00000369897 |
| ENSP00000362576 | ENSP00000376946 |
| ENSP00000362576 | ENSP00000380982 |
| ENSP00000362576 | ENSP00000384302 |
| ENSP00000362576 | ENSP00000388320 |
| ENSP00000362576 | ENSP00000389934 |
| ENSP00000362576 | ENSP00000395574 |
| ENSP00000362576 | ENSP00000401121 |
| ENSP00000362576 | ENSP00000403359 |
| ENSP00000362576 | ENSP00000415316 |
| ENSP00000362578 | ENSP00000365588 |
| ENSP00000362578 | ENSP00000368438 |
| ENSP00000362578 | ENSP00000371388 |
| ENSP00000362578 | ENSP00000371475 |
| ENSP00000362578 | ENSP00000371888 |
| ENSP00000362578 | ENSP00000372023 |
| ENSP00000362578 | ENSP00000373060 |
| ENSP00000362578 | ENSP00000373331 |
| ENSP00000362578 | ENSP00000389427 |
| ENSP00000362578 | ENSP00000402084 |
| ENSP00000362578 | ENSP00000409167 |
| ENSP00000362578 | ENSP00000417281 |
| ENSP00000362592 | ENSP00000364912 |
| ENSP00000362592 | ENSP00000364929 |
| ENSP00000362592 | ENSP00000365877 |
| ENSP00000362592 | ENSP00000366271 |
| ENSP00000362592 | ENSP00000366974 |
| ENSP00000362592 | ENSP00000368438 |
| ENSP00000362592 | ENSP00000368686 |
| ENSP00000362592 | ENSP00000369519 |
| ENSP00000362592 | ENSP00000369716 |
| ENSP00000362592 | ENSP00000370258 |
| ENSP00000362592 | ENSP00000371875 |

|                 |                 |
|-----------------|-----------------|
| ENSP00000362592 | ENSP00000374213 |
| ENSP00000362592 | ENSP00000374280 |
| ENSP00000362592 | ENSP00000379607 |
| ENSP00000362592 | ENSP00000380718 |
| ENSP00000362592 | ENSP00000381840 |
| ENSP00000362592 | ENSP00000381932 |
| ENSP00000362592 | ENSP00000384179 |
| ENSP00000362592 | ENSP00000386759 |
| ENSP00000362592 | ENSP00000392601 |
| ENSP00000362592 | ENSP00000404658 |
| ENSP00000362592 | ENSP00000414109 |
| ENSP00000362608 | ENSP00000378529 |
| ENSP00000362608 | ENSP00000417281 |
| ENSP00000362638 | ENSP00000408910 |
| ENSP00000362688 | ENSP00000363559 |
| ENSP00000362688 | ENSP00000363676 |
| ENSP00000362688 | ENSP00000364188 |
| ENSP00000362688 | ENSP00000368927 |
| ENSP00000362688 | ENSP00000369757 |
| ENSP00000362688 | ENSP00000370258 |
| ENSP00000362688 | ENSP00000377640 |
| ENSP00000362688 | ENSP00000379339 |
| ENSP00000362688 | ENSP00000379607 |
| ENSP00000362688 | ENSP00000379888 |
| ENSP00000362688 | ENSP00000387170 |
| ENSP00000362688 | ENSP00000393393 |
| ENSP00000362688 | ENSP00000396937 |
| ENSP00000362688 | ENSP00000398597 |
| ENSP00000362688 | ENSP00000414321 |
| ENSP00000362717 | ENSP00000363779 |
| ENSP00000362717 | ENSP00000372023 |
| ENSP00000362717 | ENSP00000372170 |
| ENSP00000362717 | ENSP00000381657 |
| ENSP00000362717 | ENSP00000392466 |
| ENSP00000362727 | ENSP00000370719 |
| ENSP00000362744 | ENSP00000363018 |
| ENSP00000362744 | ENSP00000363308 |
| ENSP00000362744 | ENSP00000363676 |
| ENSP00000362744 | ENSP00000363944 |
| ENSP00000362744 | ENSP00000366557 |
| ENSP00000362744 | ENSP00000369757 |
| ENSP00000362744 | ENSP00000370589 |
| ENSP00000362744 | ENSP00000371169 |
| ENSP00000362744 | ENSP00000373404 |
| ENSP00000362744 | ENSP00000375730 |
| ENSP00000362744 | ENSP00000379339 |

|                 |                 |
|-----------------|-----------------|
| ENSP00000362744 | ENSP00000379607 |
| ENSP00000362744 | ENSP00000379888 |
| ENSP00000362744 | ENSP00000380982 |
| ENSP00000362744 | ENSP00000389103 |
| ENSP00000362744 | ENSP00000392859 |
| ENSP00000362744 | ENSP00000393241 |
| ENSP00000362744 | ENSP00000402338 |
| ENSP00000362744 | ENSP00000403175 |
| ENSP00000362744 | ENSP00000412583 |
| ENSP00000362744 | ENSP00000414321 |
| ENSP00000362744 | ENSP00000416110 |
| ENSP00000362744 | ENSP00000417229 |
| ENSP00000362744 | ENSP00000420714 |
| ENSP00000362748 | ENSP00000376309 |
| ENSP00000362751 | ENSP00000369860 |
| ENSP00000362751 | ENSP00000369862 |
| ENSP00000362807 | ENSP00000397598 |
| ENSP00000362807 | ENSP00000417764 |
| ENSP00000362820 | ENSP00000362900 |
| ENSP00000362820 | ENSP00000365439 |
| ENSP00000362820 | ENSP00000370083 |
| ENSP00000362820 | ENSP00000377262 |
| ENSP00000362820 | ENSP00000379607 |
| ENSP00000362820 | ENSP00000398597 |
| ENSP00000362820 | ENSP00000416959 |
| ENSP00000362824 | ENSP00000366854 |
| ENSP00000362824 | ENSP00000368253 |
| ENSP00000362824 | ENSP00000368349 |
| ENSP00000362824 | ENSP00000379607 |
| ENSP00000362824 | ENSP00000417132 |
| ENSP00000362900 | ENSP00000364289 |
| ENSP00000362900 | ENSP00000366135 |
| ENSP00000362900 | ENSP00000366607 |
| ENSP00000362900 | ENSP00000367059 |
| ENSP00000362900 | ENSP00000373404 |
| ENSP00000362900 | ENSP00000374213 |
| ENSP00000362900 | ENSP00000374529 |
| ENSP00000362900 | ENSP00000379607 |
| ENSP00000362900 | ENSP00000380982 |
| ENSP00000362900 | ENSP00000381932 |
| ENSP00000362900 | ENSP00000387170 |
| ENSP00000362900 | ENSP00000391723 |
| ENSP00000362900 | ENSP00000416959 |
| ENSP00000362935 | ENSP00000367208 |
| ENSP00000362935 | ENSP00000401566 |
| ENSP00000362936 | ENSP00000364289 |

|                 |                 |
|-----------------|-----------------|
| ENSP00000362936 | ENSP00000366557 |
| ENSP00000362936 | ENSP00000366607 |
| ENSP00000362936 | ENSP00000366843 |
| ENSP00000362936 | ENSP00000366934 |
| ENSP00000362936 | ENSP00000376973 |
| ENSP00000362936 | ENSP00000384302 |
| ENSP00000362936 | ENSP00000386759 |
| ENSP00000362936 | ENSP00000400591 |
| ENSP00000362942 | ENSP00000380921 |
| ENSP00000362948 | ENSP00000363193 |
| ENSP00000362948 | ENSP00000381216 |
| ENSP00000362948 | ENSP00000384048 |
| ENSP00000362948 | ENSP00000391774 |
| ENSP00000362948 | ENSP00000392617 |
| ENSP00000362948 | ENSP00000418734 |
| ENSP00000362993 | ENSP00000363308 |
| ENSP00000362993 | ENSP00000364119 |
| ENSP00000362993 | ENSP00000364270 |
| ENSP00000362993 | ENSP00000364289 |
| ENSP00000362993 | ENSP00000366179 |
| ENSP00000362993 | ENSP00000368565 |
| ENSP00000362993 | ENSP00000369965 |
| ENSP00000362993 | ENSP00000414187 |
| ENSP00000363018 | ENSP00000363308 |
| ENSP00000363018 | ENSP00000363559 |
| ENSP00000363018 | ENSP00000363676 |
| ENSP00000363018 | ENSP00000364320 |
| ENSP00000363018 | ENSP00000366519 |
| ENSP00000363018 | ENSP00000366557 |
| ENSP00000363018 | ENSP00000369757 |
| ENSP00000363018 | ENSP00000370589 |
| ENSP00000363018 | ENSP00000370930 |
| ENSP00000363018 | ENSP00000373404 |
| ENSP00000363018 | ENSP00000375730 |
| ENSP00000363018 | ENSP00000377486 |
| ENSP00000363018 | ENSP00000377640 |
| ENSP00000363018 | ENSP00000377865 |
| ENSP00000363018 | ENSP00000378160 |
| ENSP00000363018 | ENSP00000379607 |
| ENSP00000363018 | ENSP00000379888 |
| ENSP00000363018 | ENSP00000380156 |
| ENSP00000363018 | ENSP00000380982 |
| ENSP00000363018 | ENSP00000382392 |
| ENSP00000363018 | ENSP00000386717 |
| ENSP00000363018 | ENSP00000389103 |
| ENSP00000363018 | ENSP00000393393 |

|                 |                 |
|-----------------|-----------------|
| ENSP00000363018 | ENSP00000402338 |
| ENSP00000363018 | ENSP00000410758 |
| ENSP00000363018 | ENSP00000414321 |
| ENSP00000363018 | ENSP00000419740 |
| ENSP00000363021 | ENSP00000364270 |
| ENSP00000363021 | ENSP00000367841 |
| ENSP00000363021 | ENSP00000368438 |
| ENSP00000363021 | ENSP00000368881 |
| ENSP00000363021 | ENSP00000369411 |
| ENSP00000363021 | ENSP00000369497 |
| ENSP00000363021 | ENSP00000370151 |
| ENSP00000363021 | ENSP00000371419 |
| ENSP00000363021 | ENSP00000371475 |
| ENSP00000363021 | ENSP00000375863 |
| ENSP00000363021 | ENSP00000379607 |
| ENSP00000363021 | ENSP00000380467 |
| ENSP00000363021 | ENSP00000394649 |
| ENSP00000363021 | ENSP00000406868 |
| ENSP00000363021 | ENSP00000407047 |
| ENSP00000363021 | ENSP00000416561 |
| ENSP00000363021 | ENSP00000420588 |
| ENSP00000363046 | ENSP00000372023 |
| ENSP00000363046 | ENSP00000380129 |
| ENSP00000363055 | ENSP00000370557 |
| ENSP00000363055 | ENSP00000398736 |
| ENSP00000363081 | ENSP00000413720 |
| ENSP00000363089 | ENSP00000364898 |
| ENSP00000363089 | ENSP00000371715 |
| ENSP00000363089 | ENSP00000374552 |
| ENSP00000363089 | ENSP00000376445 |
| ENSP00000363089 | ENSP00000412237 |
| ENSP00000363095 | ENSP00000375397 |
| ENSP00000363095 | ENSP00000382177 |
| ENSP00000363162 | ENSP00000369456 |
| ENSP00000363163 | ENSP00000363708 |
| ENSP00000363189 | ENSP00000379282 |
| ENSP00000363189 | ENSP00000390746 |
| ENSP00000363193 | ENSP00000374443 |
| ENSP00000363205 | ENSP00000364119 |
| ENSP00000363205 | ENSP00000366482 |
| ENSP00000363205 | ENSP00000377527 |
| ENSP00000363205 | ENSP00000387262 |
| ENSP00000363250 | ENSP00000386621 |
| ENSP00000363308 | ENSP00000366179 |
| ENSP00000363308 | ENSP00000368565 |
| ENSP00000363308 | ENSP00000369757 |

|                 |                 |
|-----------------|-----------------|
| ENSP00000363308 | ENSP00000370258 |
| ENSP00000363308 | ENSP00000370589 |
| ENSP00000363308 | ENSP00000375809 |
| ENSP00000363308 | ENSP00000379339 |
| ENSP00000363308 | ENSP00000379888 |
| ENSP00000363308 | ENSP00000380156 |
| ENSP00000363308 | ENSP00000389103 |
| ENSP00000363308 | ENSP00000393241 |
| ENSP00000363308 | ENSP00000403175 |
| ENSP00000363308 | ENSP00000412583 |
| ENSP00000363308 | ENSP00000414321 |
| ENSP00000363308 | ENSP00000416110 |
| ENSP00000363308 | ENSP00000417763 |
| ENSP00000363313 | ENSP00000363734 |
| ENSP00000363313 | ENSP00000363779 |
| ENSP00000363313 | ENSP00000365439 |
| ENSP00000363313 | ENSP00000366557 |
| ENSP00000363313 | ENSP00000367029 |
| ENSP00000363313 | ENSP00000368801 |
| ENSP00000363313 | ENSP00000370589 |
| ENSP00000363313 | ENSP00000374213 |
| ENSP00000363313 | ENSP00000377262 |
| ENSP00000363313 | ENSP00000380460 |
| ENSP00000363313 | ENSP00000382328 |
| ENSP00000363313 | ENSP00000400591 |
| ENSP00000363313 | ENSP00000410758 |
| ENSP00000363313 | ENSP00000412319 |
| ENSP00000363313 | ENSP00000412566 |
| ENSP00000363313 | ENSP00000414006 |
| ENSP00000363313 | ENSP00000414634 |
| ENSP00000363322 | ENSP00000378350 |
| ENSP00000363322 | ENSP00000378529 |
| ENSP00000363322 | ENSP00000394394 |
| ENSP00000363338 | ENSP00000364486 |
| ENSP00000363338 | ENSP00000375881 |
| ENSP00000363338 | ENSP00000380460 |
| ENSP00000363349 | ENSP00000397441 |
| ENSP00000363373 | ENSP00000379607 |
| ENSP00000363384 | ENSP00000363559 |
| ENSP00000363384 | ENSP00000364037 |
| ENSP00000363384 | ENSP00000364320 |
| ENSP00000363384 | ENSP00000365806 |
| ENSP00000363384 | ENSP00000368612 |
| ENSP00000363384 | ENSP00000373090 |
| ENSP00000363384 | ENSP00000377640 |
| ENSP00000363384 | ENSP00000379888 |

|                 |                 |
|-----------------|-----------------|
| ENSP00000363384 | ENSP00000383503 |
| ENSP00000363384 | ENSP00000389103 |
| ENSP00000363384 | ENSP00000394290 |
| ENSP00000363384 | ENSP00000402338 |
| ENSP00000363384 | ENSP00000403576 |
| ENSP00000363384 | ENSP00000409074 |
| ENSP00000363384 | ENSP00000409367 |
| ENSP00000363384 | ENSP00000411162 |
| ENSP00000363384 | ENSP00000413152 |
| ENSP00000363391 | ENSP00000367079 |
| ENSP00000363391 | ENSP00000371475 |
| ENSP00000363397 | ENSP00000397598 |
| ENSP00000363489 | ENSP00000363708 |
| ENSP00000363559 | ENSP00000364320 |
| ENSP00000363559 | ENSP00000365806 |
| ENSP00000363559 | ENSP00000366519 |
| ENSP00000363559 | ENSP00000368887 |
| ENSP00000363559 | ENSP00000368927 |
| ENSP00000363559 | ENSP00000370589 |
| ENSP00000363559 | ENSP00000371201 |
| ENSP00000363559 | ENSP00000371451 |
| ENSP00000363559 | ENSP00000373090 |
| ENSP00000363559 | ENSP00000373404 |
| ENSP00000363559 | ENSP00000377640 |
| ENSP00000363559 | ENSP00000377865 |
| ENSP00000363559 | ENSP00000378160 |
| ENSP00000363559 | ENSP00000379607 |
| ENSP00000363559 | ENSP00000379888 |
| ENSP00000363559 | ENSP00000380982 |
| ENSP00000363559 | ENSP00000382392 |
| ENSP00000363559 | ENSP00000388464 |
| ENSP00000363559 | ENSP00000389103 |
| ENSP00000363559 | ENSP00000390948 |
| ENSP00000363559 | ENSP00000393393 |
| ENSP00000363559 | ENSP00000394290 |
| ENSP00000363559 | ENSP00000402338 |
| ENSP00000363559 | ENSP00000403576 |
| ENSP00000363559 | ENSP00000409074 |
| ENSP00000363559 | ENSP00000409367 |
| ENSP00000363559 | ENSP00000411162 |
| ENSP00000363559 | ENSP00000412553 |
| ENSP00000363559 | ENSP00000414373 |
| ENSP00000363559 | ENSP00000419628 |
| ENSP00000363559 | ENSP00000419740 |
| ENSP00000363559 | ENSP00000420040 |
| ENSP00000363571 | ENSP00000368678 |

|                 |                 |
|-----------------|-----------------|
| ENSP00000363571 | ENSP00000373298 |
| ENSP00000363591 | ENSP00000366237 |
| ENSP00000363591 | ENSP00000381045 |
| ENSP00000363591 | ENSP00000381237 |
| ENSP00000363591 | ENSP00000401445 |
| ENSP00000363642 | ENSP00000363746 |
| ENSP00000363642 | ENSP00000364320 |
| ENSP00000363642 | ENSP00000366519 |
| ENSP00000363642 | ENSP00000370589 |
| ENSP00000363642 | ENSP00000370736 |
| ENSP00000363642 | ENSP00000371101 |
| ENSP00000363642 | ENSP00000371169 |
| ENSP00000363642 | ENSP00000372695 |
| ENSP00000363642 | ENSP00000382392 |
| ENSP00000363642 | ENSP00000384302 |
| ENSP00000363642 | ENSP00000399454 |
| ENSP00000363642 | ENSP00000402869 |
| ENSP00000363642 | ENSP00000405614 |
| ENSP00000363642 | ENSP00000410396 |
| ENSP00000363676 | ENSP00000364320 |
| ENSP00000363676 | ENSP00000366519 |
| ENSP00000363676 | ENSP00000369042 |
| ENSP00000363676 | ENSP00000369757 |
| ENSP00000363676 | ENSP00000370589 |
| ENSP00000363676 | ENSP00000371201 |
| ENSP00000363676 | ENSP00000373404 |
| ENSP00000363676 | ENSP00000374390 |
| ENSP00000363676 | ENSP00000375730 |
| ENSP00000363676 | ENSP00000376946 |
| ENSP00000363676 | ENSP00000377486 |
| ENSP00000363676 | ENSP00000377640 |
| ENSP00000363676 | ENSP00000377865 |
| ENSP00000363676 | ENSP00000378160 |
| ENSP00000363676 | ENSP00000379607 |
| ENSP00000363676 | ENSP00000379888 |
| ENSP00000363676 | ENSP00000380156 |
| ENSP00000363676 | ENSP00000382392 |
| ENSP00000363676 | ENSP00000386717 |
| ENSP00000363676 | ENSP00000388464 |
| ENSP00000363676 | ENSP00000389103 |
| ENSP00000363676 | ENSP00000392859 |
| ENSP00000363676 | ENSP00000393241 |
| ENSP00000363676 | ENSP00000393393 |
| ENSP00000363676 | ENSP00000394085 |
| ENSP00000363676 | ENSP00000402338 |
| ENSP00000363676 | ENSP00000403175 |



|                 |                 |
|-----------------|-----------------|
| ENSP00000363676 | ENSP00000412583 |
| ENSP00000363676 | ENSP00000414321 |
| ENSP00000363676 | ENSP00000416110 |
| ENSP00000363676 | ENSP00000417281 |
| ENSP00000363676 | ENSP00000419740 |
| ENSP00000363680 | ENSP00000399511 |
| ENSP00000363708 | ENSP00000363745 |
| ENSP00000363708 | ENSP00000370589 |
| ENSP00000363708 | ENSP00000383295 |
| ENSP00000363708 | ENSP00000388322 |
| ENSP00000363734 | ENSP00000364320 |
| ENSP00000363734 | ENSP00000369736 |
| ENSP00000363734 | ENSP00000374213 |
| ENSP00000363734 | ENSP00000374566 |
| ENSP00000363734 | ENSP00000376946 |
| ENSP00000363734 | ENSP00000377793 |
| ENSP00000363734 | ENSP00000382562 |
| ENSP00000363745 | ENSP00000366843 |
| ENSP00000363745 | ENSP00000370083 |
| ENSP00000363745 | ENSP00000370119 |
| ENSP00000363745 | ENSP00000371888 |
| ENSP00000363745 | ENSP00000379607 |
| ENSP00000363746 | ENSP00000366557 |
| ENSP00000363746 | ENSP00000370589 |
| ENSP00000363746 | ENSP00000371101 |
| ENSP00000363746 | ENSP00000376758 |
| ENSP00000363746 | ENSP00000384302 |
| ENSP00000363746 | ENSP00000410396 |
| ENSP00000363763 | ENSP00000370719 |
| ENSP00000363763 | ENSP00000373700 |
| ENSP00000363763 | ENSP00000377492 |
| ENSP00000363763 | ENSP00000381098 |
| ENSP00000363763 | ENSP00000383623 |
| ENSP00000363779 | ENSP00000364289 |
| ENSP00000363779 | ENSP00000364929 |
| ENSP00000363779 | ENSP00000365505 |
| ENSP00000363779 | ENSP00000365588 |
| ENSP00000363779 | ENSP00000365837 |
| ENSP00000363779 | ENSP00000366974 |
| ENSP00000363779 | ENSP00000367034 |
| ENSP00000363779 | ENSP00000369038 |
| ENSP00000363779 | ENSP00000369335 |
| ENSP00000363779 | ENSP00000373060 |
| ENSP00000363779 | ENSP00000374280 |
| ENSP00000363779 | ENSP00000374399 |
| ENSP00000363779 | ENSP00000382177 |

|                 |                 |
|-----------------|-----------------|
| ENSP00000363779 | ENSP00000384048 |
| ENSP00000363779 | ENSP00000386227 |
| ENSP00000363779 | ENSP00000387429 |
| ENSP00000363779 | ENSP00000388320 |
| ENSP00000363779 | ENSP00000396484 |
| ENSP00000363779 | ENSP00000403852 |
| ENSP00000363779 | ENSP00000404318 |
| ENSP00000363779 | ENSP00000409167 |
| ENSP00000363779 | ENSP00000409275 |
| ENSP00000363779 | ENSP00000412922 |
| ENSP00000363779 | ENSP00000415212 |
| ENSP00000363779 | ENSP00000416511 |
| ENSP00000363779 | ENSP00000419599 |
| ENSP00000363787 | ENSP00000396439 |
| ENSP00000363787 | ENSP00000419494 |
| ENSP00000363812 | ENSP00000379372 |
| ENSP00000363827 | ENSP00000368686 |
| ENSP00000363827 | ENSP00000384169 |
| ENSP00000363832 | ENSP00000368226 |
| ENSP00000363899 | ENSP00000369843 |
| ENSP00000363921 | ENSP00000368872 |
| ENSP00000363921 | ENSP00000370517 |
| ENSP00000363921 | ENSP00000403175 |
| ENSP00000363921 | ENSP00000418070 |
| ENSP00000363944 | ENSP00000366519 |
| ENSP00000363944 | ENSP00000366557 |
| ENSP00000363944 | ENSP00000366934 |
| ENSP00000363944 | ENSP00000368612 |
| ENSP00000363944 | ENSP00000373918 |
| ENSP00000363944 | ENSP00000379607 |
| ENSP00000363944 | ENSP00000382392 |
| ENSP00000363944 | ENSP00000384490 |
| ENSP00000363944 | ENSP00000397435 |
| ENSP00000363972 | ENSP00000368439 |
| ENSP00000363972 | ENSP00000368605 |
| ENSP00000363976 | ENSP00000372718 |
| ENSP00000363976 | ENSP00000378723 |
| ENSP00000363976 | ENSP00000398890 |
| ENSP00000363985 | ENSP00000381031 |
| ENSP00000363985 | ENSP00000384534 |
| ENSP00000363999 | ENSP00000377265 |
| ENSP00000364035 | ENSP00000370377 |
| ENSP00000364037 | ENSP00000364320 |
| ENSP00000364037 | ENSP00000365806 |
| ENSP00000364037 | ENSP00000368612 |
| ENSP00000364037 | ENSP00000373090 |

|                 |                 |
|-----------------|-----------------|
| ENSP00000364037 | ENSP00000379607 |
| ENSP00000364037 | ENSP00000394290 |
| ENSP00000364037 | ENSP00000403576 |
| ENSP00000364037 | ENSP00000409074 |
| ENSP00000364037 | ENSP00000409367 |
| ENSP00000364037 | ENSP00000411162 |
| ENSP00000364119 | ENSP00000365025 |
| ENSP00000364119 | ENSP00000368927 |
| ENSP00000364119 | ENSP00000369757 |
| ENSP00000364119 | ENSP00000370258 |
| ENSP00000364119 | ENSP00000372199 |
| ENSP00000364119 | ENSP00000379607 |
| ENSP00000364119 | ENSP00000389913 |
| ENSP00000364119 | ENSP00000394869 |
| ENSP00000364119 | ENSP00000417229 |
| ENSP00000364126 | ENSP00000364270 |
| ENSP00000364126 | ENSP00000368349 |
| ENSP00000364126 | ENSP00000368438 |
| ENSP00000364126 | ENSP00000370151 |
| ENSP00000364126 | ENSP00000370376 |
| ENSP00000364126 | ENSP00000384048 |
| ENSP00000364126 | ENSP00000400806 |
| ENSP00000364188 | ENSP00000366748 |
| ENSP00000364188 | ENSP00000370414 |
| ENSP00000364188 | ENSP00000380793 |
| ENSP00000364188 | ENSP00000381891 |
| ENSP00000364188 | ENSP00000392330 |
| ENSP00000364212 | ENSP00000364649 |
| ENSP00000364212 | ENSP00000373715 |
| ENSP00000364212 | ENSP00000377665 |
| ENSP00000364212 | ENSP00000380251 |
| ENSP00000364212 | ENSP00000394869 |
| ENSP00000364212 | ENSP00000411409 |
| ENSP00000364212 | ENSP00000419628 |
| ENSP00000364270 | ENSP00000365588 |
| ENSP00000364270 | ENSP00000366249 |
| ENSP00000364270 | ENSP00000366271 |
| ENSP00000364270 | ENSP00000368349 |
| ENSP00000364270 | ENSP00000368438 |
| ENSP00000364270 | ENSP00000368699 |
| ENSP00000364270 | ENSP00000369335 |
| ENSP00000364270 | ENSP00000369411 |
| ENSP00000364270 | ENSP00000370150 |
| ENSP00000364270 | ENSP00000370151 |
| ENSP00000364270 | ENSP00000370376 |
| ENSP00000364270 | ENSP00000371475 |

|                 |                 |
|-----------------|-----------------|
| ENSP00000364270 | ENSP00000372023 |
| ENSP00000364270 | ENSP00000373039 |
| ENSP00000364270 | ENSP00000373060 |
| ENSP00000364270 | ENSP00000375809 |
| ENSP00000364270 | ENSP00000380460 |
| ENSP00000364270 | ENSP00000381657 |
| ENSP00000364270 | ENSP00000384048 |
| ENSP00000364270 | ENSP00000387429 |
| ENSP00000364270 | ENSP00000396152 |
| ENSP00000364270 | ENSP00000396484 |
| ENSP00000364270 | ENSP00000401445 |
| ENSP00000364270 | ENSP00000404318 |
| ENSP00000364270 | ENSP00000406490 |
| ENSP00000364270 | ENSP00000409167 |
| ENSP00000364270 | ENSP00000410416 |
| ENSP00000364270 | ENSP00000415212 |
| ENSP00000364270 | ENSP00000416511 |
| ENSP00000364270 | ENSP00000418111 |
| ENSP00000364289 | ENSP00000366557 |
| ENSP00000364289 | ENSP00000366607 |
| ENSP00000364289 | ENSP00000367208 |
| ENSP00000364289 | ENSP00000368801 |
| ENSP00000364289 | ENSP00000369716 |
| ENSP00000364289 | ENSP00000369757 |
| ENSP00000364289 | ENSP00000370460 |
| ENSP00000364289 | ENSP00000370589 |
| ENSP00000364289 | ENSP00000372093 |
| ENSP00000364289 | ENSP00000372445 |
| ENSP00000364289 | ENSP00000373657 |
| ENSP00000364289 | ENSP00000376973 |
| ENSP00000364289 | ENSP00000377747 |
| ENSP00000364289 | ENSP00000378350 |
| ENSP00000364289 | ENSP00000379607 |
| ENSP00000364289 | ENSP00000387911 |
| ENSP00000364289 | ENSP00000392028 |
| ENSP00000364289 | ENSP00000393953 |
| ENSP00000364289 | ENSP00000396068 |
| ENSP00000364289 | ENSP00000400591 |
| ENSP00000364289 | ENSP00000401371 |
| ENSP00000364289 | ENSP00000410758 |
| ENSP00000364289 | ENSP00000412566 |
| ENSP00000364289 | ENSP00000420588 |
| ENSP00000364293 | ENSP00000379888 |
| ENSP00000364293 | ENSP00000391723 |
| ENSP00000364320 | ENSP00000365806 |
| ENSP00000364320 | ENSP00000366519 |

|                 |                 |
|-----------------|-----------------|
| ENSP00000364320 | ENSP00000368612 |
| ENSP00000364320 | ENSP00000368887 |
| ENSP00000364320 | ENSP00000369042 |
| ENSP00000364320 | ENSP00000369162 |
| ENSP00000364320 | ENSP00000369757 |
| ENSP00000364320 | ENSP00000371201 |
| ENSP00000364320 | ENSP00000372199 |
| ENSP00000364320 | ENSP00000373090 |
| ENSP00000364320 | ENSP00000373404 |
| ENSP00000364320 | ENSP00000374399 |
| ENSP00000364320 | ENSP00000375730 |
| ENSP00000364320 | ENSP00000376946 |
| ENSP00000364320 | ENSP00000377486 |
| ENSP00000364320 | ENSP00000377617 |
| ENSP00000364320 | ENSP00000377640 |
| ENSP00000364320 | ENSP00000377865 |
| ENSP00000364320 | ENSP00000378160 |
| ENSP00000364320 | ENSP00000378736 |
| ENSP00000364320 | ENSP00000379339 |
| ENSP00000364320 | ENSP00000379888 |
| ENSP00000364320 | ENSP00000380156 |
| ENSP00000364320 | ENSP00000380982 |
| ENSP00000364320 | ENSP00000382392 |
| ENSP00000364320 | ENSP00000386134 |
| ENSP00000364320 | ENSP00000386717 |
| ENSP00000364320 | ENSP00000386992 |
| ENSP00000364320 | ENSP00000388464 |
| ENSP00000364320 | ENSP00000389103 |
| ENSP00000364320 | ENSP00000393241 |
| ENSP00000364320 | ENSP00000393393 |
| ENSP00000364320 | ENSP00000394290 |
| ENSP00000364320 | ENSP00000398597 |
| ENSP00000364320 | ENSP00000402338 |
| ENSP00000364320 | ENSP00000403175 |
| ENSP00000364320 | ENSP00000403576 |
| ENSP00000364320 | ENSP00000403817 |
| ENSP00000364320 | ENSP00000409074 |
| ENSP00000364320 | ENSP00000409367 |
| ENSP00000364320 | ENSP00000411162 |
| ENSP00000364320 | ENSP00000412583 |
| ENSP00000364320 | ENSP00000414187 |
| ENSP00000364320 | ENSP00000414321 |
| ENSP00000364320 | ENSP00000416110 |
| ENSP00000364320 | ENSP00000419740 |
| ENSP00000364320 | ENSP00000420714 |
| ENSP00000364349 | ENSP00000368798 |

|                 |                 |
|-----------------|-----------------|
| ENSP00000364349 | ENSP00000396620 |
| ENSP00000364398 | ENSP00000369716 |
| ENSP00000364398 | ENSP00000370119 |
| ENSP00000364398 | ENSP00000396876 |
| ENSP00000364398 | ENSP00000401371 |
| ENSP00000364403 | ENSP00000379457 |
| ENSP00000364403 | ENSP00000397956 |
| ENSP00000364404 | ENSP00000384109 |
| ENSP00000364430 | ENSP00000367406 |
| ENSP00000364430 | ENSP00000408792 |
| ENSP00000364486 | ENSP00000371888 |
| ENSP00000364486 | ENSP00000407401 |
| ENSP00000364493 | ENSP00000366135 |
| ENSP00000364524 | ENSP00000365735 |
| ENSP00000364524 | ENSP00000374240 |
| ENSP00000364524 | ENSP00000379228 |
| ENSP00000364524 | ENSP00000384523 |
| ENSP00000364524 | ENSP00000386520 |
| ENSP00000364524 | ENSP00000391774 |
| ENSP00000364524 | ENSP00000417281 |
| ENSP00000364543 | ENSP00000366135 |
| ENSP00000364543 | ENSP00000368887 |
| ENSP00000364543 | ENSP00000368984 |
| ENSP00000364543 | ENSP00000369325 |
| ENSP00000364543 | ENSP00000380460 |
| ENSP00000364543 | ENSP00000402338 |
| ENSP00000364543 | ENSP00000412566 |
| ENSP00000364578 | ENSP00000372335 |
| ENSP00000364582 | ENSP00000379607 |
| ENSP00000364591 | ENSP00000367408 |
| ENSP00000364591 | ENSP00000400806 |
| ENSP00000364595 | ENSP00000368698 |
| ENSP00000364649 | ENSP00000364699 |
| ENSP00000364649 | ENSP00000366482 |
| ENSP00000364649 | ENSP00000379607 |
| ENSP00000364649 | ENSP00000386227 |
| ENSP00000364649 | ENSP00000387262 |
| ENSP00000364699 | ENSP00000366843 |
| ENSP00000364699 | ENSP00000387262 |
| ENSP00000364709 | ENSP00000381293 |
| ENSP00000364794 | ENSP00000364815 |
| ENSP00000364794 | ENSP00000364847 |
| ENSP00000364794 | ENSP00000367498 |
| ENSP00000364794 | ENSP00000369038 |
| ENSP00000364794 | ENSP00000373918 |
| ENSP00000364794 | ENSP00000379607 |

|                 |                 |
|-----------------|-----------------|
| ENSP00000364794 | ENSP00000381863 |
| ENSP00000364794 | ENSP00000401121 |
| ENSP00000364794 | ENSP00000403359 |
| ENSP00000364794 | ENSP00000415316 |
| ENSP00000364813 | ENSP00000366135 |
| ENSP00000364813 | ENSP00000366557 |
| ENSP00000364813 | ENSP00000370119 |
| ENSP00000364813 | ENSP00000373715 |
| ENSP00000364813 | ENSP00000376973 |
| ENSP00000364813 | ENSP00000398597 |
| ENSP00000364813 | ENSP00000400591 |
| ENSP00000364813 | ENSP00000410758 |
| ENSP00000364814 | ENSP00000381031 |
| ENSP00000364814 | ENSP00000382562 |
| ENSP00000364839 | ENSP00000376204 |
| ENSP00000364839 | ENSP00000404658 |
| ENSP00000364839 | ENSP00000414187 |
| ENSP00000364839 | ENSP00000417132 |
| ENSP00000364847 | ENSP00000364860 |
| ENSP00000364847 | ENSP00000365131 |
| ENSP00000364847 | ENSP00000367721 |
| ENSP00000364847 | ENSP00000368698 |
| ENSP00000364847 | ENSP00000372170 |
| ENSP00000364883 | ENSP00000372445 |
| ENSP00000364893 | ENSP00000364898 |
| ENSP00000364893 | ENSP00000365891 |
| ENSP00000364893 | ENSP00000367408 |
| ENSP00000364893 | ENSP00000378338 |
| ENSP00000364893 | ENSP00000399511 |
| ENSP00000364893 | ENSP00000417763 |
| ENSP00000364895 | ENSP00000367059 |
| ENSP00000364895 | ENSP00000392466 |
| ENSP00000364898 | ENSP00000369312 |
| ENSP00000364898 | ENSP00000373614 |
| ENSP00000364898 | ENSP00000376544 |
| ENSP00000364898 | ENSP00000384053 |
| ENSP00000364898 | ENSP00000394049 |
| ENSP00000364912 | ENSP00000368698 |
| ENSP00000364929 | ENSP00000368438 |
| ENSP00000364929 | ENSP00000374213 |
| ENSP00000364929 | ENSP00000386759 |
| ENSP00000364929 | ENSP00000397259 |
| ENSP00000364965 | ENSP00000397259 |
| ENSP00000364986 | ENSP00000377954 |
| ENSP00000365005 | ENSP00000366121 |
| ENSP00000365005 | ENSP00000370719 |

|                 |                 |
|-----------------|-----------------|
| ENSP00000365005 | ENSP00000375986 |
| ENSP00000365005 | ENSP00000378306 |
| ENSP00000365005 | ENSP00000380450 |
| ENSP00000365005 | ENSP00000381932 |
| ENSP00000365005 | ENSP00000382562 |
| ENSP00000365005 | ENSP00000394071 |
| ENSP00000365007 | ENSP00000368523 |
| ENSP00000365016 | ENSP00000378368 |
| ENSP00000365016 | ENSP00000381793 |
| ENSP00000365016 | ENSP00000383431 |
| ENSP00000365016 | ENSP00000417281 |
| ENSP00000365025 | ENSP00000366974 |
| ENSP00000365025 | ENSP00000369716 |
| ENSP00000365025 | ENSP00000369965 |
| ENSP00000365025 | ENSP00000374280 |
| ENSP00000365025 | ENSP00000374443 |
| ENSP00000365025 | ENSP00000377747 |
| ENSP00000365025 | ENSP00000379457 |
| ENSP00000365025 | ENSP00000380414 |
| ENSP00000365025 | ENSP00000386759 |
| ENSP00000365025 | ENSP00000396704 |
| ENSP00000365025 | ENSP00000412553 |
| ENSP00000365025 | ENSP00000414373 |
| ENSP00000365131 | ENSP00000366843 |
| ENSP00000365131 | ENSP00000381657 |
| ENSP00000365131 | ENSP00000401980 |
| ENSP00000365145 | ENSP00000368017 |
| ENSP00000365147 | ENSP00000375857 |
| ENSP00000365147 | ENSP00000380431 |
| ENSP00000365147 | ENSP00000382177 |
| ENSP00000365175 | ENSP00000379607 |
| ENSP00000365175 | ENSP00000380921 |
| ENSP00000365175 | ENSP00000387262 |
| ENSP00000365233 | ENSP00000386227 |
| ENSP00000365243 | ENSP00000389649 |
| ENSP00000365318 | ENSP00000380531 |
| ENSP00000365318 | ENSP00000398494 |
| ENSP00000365388 | ENSP00000366557 |
| ENSP00000365401 | ENSP00000365477 |
| ENSP00000365401 | ENSP00000419475 |
| ENSP00000365435 | ENSP00000367440 |
| ENSP00000365439 | ENSP00000366607 |
| ENSP00000365439 | ENSP00000366829 |
| ENSP00000365439 | ENSP00000368698 |
| ENSP00000365439 | ENSP00000368755 |
| ENSP00000365439 | ENSP00000368801 |



|                 |                 |
|-----------------|-----------------|
| ENSP00000365439 | ENSP00000369162 |
| ENSP00000365439 | ENSP00000375863 |
| ENSP00000365439 | ENSP00000379607 |
| ENSP00000365439 | ENSP00000380921 |
| ENSP00000365439 | ENSP00000386161 |
| ENSP00000365439 | ENSP00000417281 |
| ENSP00000365477 | ENSP00000379607 |
| ENSP00000365505 | ENSP00000369816 |
| ENSP00000365505 | ENSP00000392330 |
| ENSP00000365522 | ENSP00000385083 |
| ENSP00000365534 | ENSP00000365773 |
| ENSP00000365534 | ENSP00000366395 |
| ENSP00000365534 | ENSP00000366434 |
| ENSP00000365534 | ENSP00000366620 |
| ENSP00000365534 | ENSP00000368109 |
| ENSP00000365534 | ENSP00000370517 |
| ENSP00000365534 | ENSP00000376946 |
| ENSP00000365534 | ENSP00000392859 |
| ENSP00000365534 | ENSP00000396937 |
| ENSP00000365534 | ENSP00000401508 |
| ENSP00000365588 | ENSP00000369335 |
| ENSP00000365588 | ENSP00000370151 |
| ENSP00000365588 | ENSP00000371475 |
| ENSP00000365588 | ENSP00000372023 |
| ENSP00000365588 | ENSP00000373060 |
| ENSP00000365588 | ENSP00000381657 |
| ENSP00000365588 | ENSP00000396704 |
| ENSP00000365588 | ENSP00000400806 |
| ENSP00000365630 | ENSP00000389934 |
| ENSP00000365637 | ENSP00000379607 |
| ENSP00000365637 | ENSP00000392896 |
| ENSP00000365651 | ENSP00000381031 |
| ENSP00000365651 | ENSP00000398028 |
| ENSP00000365663 | ENSP00000398028 |
| ENSP00000365735 | ENSP00000372170 |
| ENSP00000365735 | ENSP00000384048 |
| ENSP00000365735 | ENSP00000414750 |
| ENSP00000365747 | ENSP00000395535 |
| ENSP00000365766 | ENSP00000368066 |
| ENSP00000365766 | ENSP00000370930 |
| ENSP00000365773 | ENSP00000366156 |
| ENSP00000365773 | ENSP00000370718 |
| ENSP00000365773 | ENSP00000399511 |
| ENSP00000365773 | ENSP00000408058 |
| ENSP00000365806 | ENSP00000366519 |
| ENSP00000365806 | ENSP00000377640 |

|                 |                 |
|-----------------|-----------------|
| ENSP00000365806 | ENSP00000379888 |
| ENSP00000365806 | ENSP00000380982 |
| ENSP00000365806 | ENSP00000382392 |
| ENSP00000365806 | ENSP00000389103 |
| ENSP00000365806 | ENSP00000394071 |
| ENSP00000365806 | ENSP00000402338 |
| ENSP00000365806 | ENSP00000419740 |
| ENSP00000365811 | ENSP00000366135 |
| ENSP00000365811 | ENSP00000368349 |
| ENSP00000365811 | ENSP00000368439 |
| ENSP00000365811 | ENSP00000368984 |
| ENSP00000365811 | ENSP00000394791 |
| ENSP00000365811 | ENSP00000412566 |
| ENSP00000365837 | ENSP00000370589 |
| ENSP00000365837 | ENSP00000370741 |
| ENSP00000365837 | ENSP00000373082 |
| ENSP00000365837 | ENSP00000379888 |
| ENSP00000365837 | ENSP00000382595 |
| ENSP00000365837 | ENSP00000382779 |
| ENSP00000365837 | ENSP00000388275 |
| ENSP00000365837 | ENSP00000389065 |
| ENSP00000365837 | ENSP00000411327 |
| ENSP00000365837 | ENSP00000412553 |
| ENSP00000365837 | ENSP00000413319 |
| ENSP00000365837 | ENSP00000414373 |
| ENSP00000365838 | ENSP00000372023 |
| ENSP00000365840 | ENSP00000389934 |
| ENSP00000365840 | ENSP00000397441 |
| ENSP00000365877 | ENSP00000366271 |
| ENSP00000365877 | ENSP00000368017 |
| ENSP00000365877 | ENSP00000374280 |
| ENSP00000365877 | ENSP00000375097 |
| ENSP00000365877 | ENSP00000384109 |
| ENSP00000365877 | ENSP00000386759 |
| ENSP00000365877 | ENSP00000395535 |
| ENSP00000365877 | ENSP00000417281 |
| ENSP00000365877 | ENSP00000417980 |
| ENSP00000365891 | ENSP00000366121 |
| ENSP00000365891 | ENSP00000366746 |
| ENSP00000365891 | ENSP00000368801 |
| ENSP00000365891 | ENSP00000368818 |
| ENSP00000365891 | ENSP00000370719 |
| ENSP00000365891 | ENSP00000377047 |
| ENSP00000365891 | ENSP00000379228 |
| ENSP00000365891 | ENSP00000379709 |
| ENSP00000365891 | ENSP00000380431 |

|                 |                 |
|-----------------|-----------------|
| ENSP00000365891 | ENSP00000380450 |
| ENSP00000365891 | ENSP00000382177 |
| ENSP00000365891 | ENSP00000386161 |
| ENSP00000365891 | ENSP00000386456 |
| ENSP00000365891 | ENSP00000386722 |
| ENSP00000365891 | ENSP00000394085 |
| ENSP00000365891 | ENSP00000402515 |
| ENSP00000365891 | ENSP00000407879 |
| ENSP00000365891 | ENSP00000408910 |
| ENSP00000365891 | ENSP00000413625 |
| ENSP00000365898 | ENSP00000395574 |
| ENSP00000365908 | ENSP00000381031 |
| ENSP00000365924 | ENSP00000398677 |
| ENSP00000365943 | ENSP00000376268 |
| ENSP00000365943 | ENSP00000377280 |
| ENSP00000365962 | ENSP00000408910 |
| ENSP00000365963 | ENSP00000391723 |
| ENSP00000366030 | ENSP00000368439 |
| ENSP00000366030 | ENSP00000377265 |
| ENSP00000366030 | ENSP00000382779 |
| ENSP00000366030 | ENSP00000387019 |
| ENSP00000366030 | ENSP00000400591 |
| ENSP00000366030 | ENSP00000410758 |
| ENSP00000366030 | ENSP00000412566 |
| ENSP00000366032 | ENSP00000370984 |
| ENSP00000366032 | ENSP00000419475 |
| ENSP00000366070 | ENSP00000369274 |
| ENSP00000366121 | ENSP00000376410 |
| ENSP00000366121 | ENSP00000380450 |
| ENSP00000366121 | ENSP00000380921 |
| ENSP00000366121 | ENSP00000382177 |
| ENSP00000366121 | ENSP00000382423 |
| ENSP00000366121 | ENSP00000386878 |
| ENSP00000366121 | ENSP00000391249 |
| ENSP00000366121 | ENSP00000397351 |
| ENSP00000366135 | ENSP00000366519 |
| ENSP00000366135 | ENSP00000366607 |
| ENSP00000366135 | ENSP00000368017 |
| ENSP00000366135 | ENSP00000368984 |
| ENSP00000366135 | ENSP00000369897 |
| ENSP00000366135 | ENSP00000370741 |
| ENSP00000366135 | ENSP00000370883 |
| ENSP00000366135 | ENSP00000371201 |
| ENSP00000366135 | ENSP00000373918 |
| ENSP00000366135 | ENSP00000374390 |
| ENSP00000366135 | ENSP00000375809 |

|                 |                 |
|-----------------|-----------------|
| ENSP00000366135 | ENSP00000379607 |
| ENSP00000366135 | ENSP00000380460 |
| ENSP00000366135 | ENSP00000380495 |
| ENSP00000366135 | ENSP00000382177 |
| ENSP00000366135 | ENSP00000382392 |
| ENSP00000366135 | ENSP00000382492 |
| ENSP00000366135 | ENSP00000386134 |
| ENSP00000366135 | ENSP00000388464 |
| ENSP00000366135 | ENSP00000391944 |
| ENSP00000366135 | ENSP00000398597 |
| ENSP00000366135 | ENSP00000403852 |
| ENSP00000366135 | ENSP00000406293 |
| ENSP00000366135 | ENSP00000412310 |
| ENSP00000366135 | ENSP00000414634 |
| ENSP00000366135 | ENSP00000419740 |
| ENSP00000366156 | ENSP00000366237 |
| ENSP00000366156 | ENSP00000366395 |
| ENSP00000366156 | ENSP00000377865 |
| ENSP00000366179 | ENSP00000368565 |
| ENSP00000366179 | ENSP00000369897 |
| ENSP00000366179 | ENSP00000370589 |
| ENSP00000366179 | ENSP00000371451 |
| ENSP00000366179 | ENSP00000377640 |
| ENSP00000366179 | ENSP00000379282 |
| ENSP00000366179 | ENSP00000384211 |
| ENSP00000366179 | ENSP00000390746 |
| ENSP00000366179 | ENSP00000391944 |
| ENSP00000366179 | ENSP00000401445 |
| ENSP00000366225 | ENSP00000374529 |
| ENSP00000366225 | ENSP00000385347 |
| ENSP00000366225 | ENSP00000390783 |
| ENSP00000366225 | ENSP00000401445 |
| ENSP00000366225 | ENSP00000418661 |
| ENSP00000366233 | ENSP00000381293 |
| ENSP00000366237 | ENSP00000367454 |
| ENSP00000366237 | ENSP00000381031 |
| ENSP00000366237 | ENSP00000381237 |
| ENSP00000366249 | ENSP00000366746 |
| ENSP00000366249 | ENSP00000370521 |
| ENSP00000366249 | ENSP00000370737 |
| ENSP00000366249 | ENSP00000376758 |
| ENSP00000366249 | ENSP00000377040 |
| ENSP00000366249 | ENSP00000377865 |
| ENSP00000366249 | ENSP00000377914 |
| ENSP00000366249 | ENSP00000378160 |
| ENSP00000366249 | ENSP00000383719 |

|                 |                 |
|-----------------|-----------------|
| ENSP00000366249 | ENSP00000388035 |
| ENSP00000366271 | ENSP00000366974 |
| ENSP00000366271 | ENSP00000367705 |
| ENSP00000366271 | ENSP00000371475 |
| ENSP00000366271 | ENSP00000384490 |
| ENSP00000366271 | ENSP00000396439 |
| ENSP00000366271 | ENSP00000419494 |
| ENSP00000366395 | ENSP00000366748 |
| ENSP00000366395 | ENSP00000377954 |
| ENSP00000366395 | ENSP00000379228 |
| ENSP00000366395 | ENSP00000381282 |
| ENSP00000366395 | ENSP00000384900 |
| ENSP00000366395 | ENSP00000389182 |
| ENSP00000366395 | ENSP00000401445 |
| ENSP00000366413 | ENSP00000381031 |
| ENSP00000366434 | ENSP00000367408 |
| ENSP00000366434 | ENSP00000373060 |
| ENSP00000366434 | ENSP00000417281 |
| ENSP00000366482 | ENSP00000370372 |
| ENSP00000366482 | ENSP00000371607 |
| ENSP00000366482 | ENSP00000372326 |
| ENSP00000366519 | ENSP00000366557 |
| ENSP00000366519 | ENSP00000368887 |
| ENSP00000366519 | ENSP00000370589 |
| ENSP00000366519 | ENSP00000372199 |
| ENSP00000366519 | ENSP00000373090 |
| ENSP00000366519 | ENSP00000377640 |
| ENSP00000366519 | ENSP00000380982 |
| ENSP00000366519 | ENSP00000389103 |
| ENSP00000366519 | ENSP00000394290 |
| ENSP00000366519 | ENSP00000402338 |
| ENSP00000366519 | ENSP00000403576 |
| ENSP00000366519 | ENSP00000409074 |
| ENSP00000366519 | ENSP00000409367 |
| ENSP00000366519 | ENSP00000411162 |
| ENSP00000366519 | ENSP00000420357 |
| ENSP00000366557 | ENSP00000368438 |
| ENSP00000366557 | ENSP00000368801 |
| ENSP00000366557 | ENSP00000368984 |
| ENSP00000366557 | ENSP00000369409 |
| ENSP00000366557 | ENSP00000370589 |
| ENSP00000366557 | ENSP00000371201 |
| ENSP00000366557 | ENSP00000372695 |
| ENSP00000366557 | ENSP00000372883 |
| ENSP00000366557 | ENSP00000376309 |
| ENSP00000366557 | ENSP00000376973 |

|                 |                 |
|-----------------|-----------------|
| ENSP00000366557 | ENSP00000379607 |
| ENSP00000366557 | ENSP00000379888 |
| ENSP00000366557 | ENSP00000380982 |
| ENSP00000366557 | ENSP00000382392 |
| ENSP00000366557 | ENSP00000382779 |
| ENSP00000366557 | ENSP00000384573 |
| ENSP00000366557 | ENSP00000387006 |
| ENSP00000366557 | ENSP00000388464 |
| ENSP00000366557 | ENSP00000393953 |
| ENSP00000366557 | ENSP00000399454 |
| ENSP00000366557 | ENSP00000400591 |
| ENSP00000366557 | ENSP00000402338 |
| ENSP00000366557 | ENSP00000402869 |
| ENSP00000366557 | ENSP00000403345 |
| ENSP00000366557 | ENSP00000405614 |
| ENSP00000366557 | ENSP00000406280 |
| ENSP00000366557 | ENSP00000410758 |
| ENSP00000366557 | ENSP00000412566 |
| ENSP00000366557 | ENSP00000414006 |
| ENSP00000366557 | ENSP00000414634 |
| ENSP00000366557 | ENSP00000416959 |
| ENSP00000366557 | ENSP00000417451 |
| ENSP00000366557 | ENSP00000419740 |
| ENSP00000366557 | ENSP00000420195 |
| ENSP00000366565 | ENSP00000367299 |
| ENSP00000366565 | ENSP00000368818 |
| ENSP00000366565 | ENSP00000381293 |
| ENSP00000366565 | ENSP00000417764 |
| ENSP00000366607 | ENSP00000366829 |
| ENSP00000366607 | ENSP00000366843 |
| ENSP00000366607 | ENSP00000368801 |
| ENSP00000366607 | ENSP00000369218 |
| ENSP00000366607 | ENSP00000375863 |
| ENSP00000366607 | ENSP00000377262 |
| ENSP00000366607 | ENSP00000381031 |
| ENSP00000366607 | ENSP00000386759 |
| ENSP00000366607 | ENSP00000387170 |
| ENSP00000366607 | ENSP00000404121 |
| ENSP00000366607 | ENSP00000412566 |
| ENSP00000366607 | ENSP00000416959 |
| ENSP00000366607 | ENSP00000420195 |
| ENSP00000366620 | ENSP00000367024 |
| ENSP00000366620 | ENSP00000367059 |
| ENSP00000366620 | ENSP00000368589 |
| ENSP00000366620 | ENSP00000369100 |
| ENSP00000366620 | ENSP00000379678 |

|                 |                 |
|-----------------|-----------------|
| ENSP00000366620 | ENSP00000387170 |
| ENSP00000366672 | ENSP00000378306 |
| ENSP00000366682 | ENSP00000368699 |
| ENSP00000366682 | ENSP00000369531 |
| ENSP00000366682 | ENSP00000387262 |
| ENSP00000366729 | ENSP00000368538 |
| ENSP00000366746 | ENSP00000370737 |
| ENSP00000366746 | ENSP00000373039 |
| ENSP00000366746 | ENSP00000376544 |
| ENSP00000366746 | ENSP00000379500 |
| ENSP00000366746 | ENSP00000380460 |
| ENSP00000366746 | ENSP00000396152 |
| ENSP00000366746 | ENSP00000410416 |
| ENSP00000366800 | ENSP00000387262 |
| ENSP00000366828 | ENSP00000367029 |
| ENSP00000366828 | ENSP00000378736 |
| ENSP00000366828 | ENSP00000382058 |
| ENSP00000366828 | ENSP00000383503 |
| ENSP00000366828 | ENSP00000397636 |
| ENSP00000366828 | ENSP00000403852 |
| ENSP00000366828 | ENSP00000405636 |
| ENSP00000366828 | ENSP00000406293 |
| ENSP00000366828 | ENSP00000410530 |
| ENSP00000366828 | ENSP00000410954 |
| ENSP00000366828 | ENSP00000414110 |
| ENSP00000366828 | ENSP00000416599 |
| ENSP00000366828 | ENSP00000418734 |
| ENSP00000366829 | ENSP00000396301 |
| ENSP00000366829 | ENSP00000418734 |
| ENSP00000366843 | ENSP00000379607 |
| ENSP00000366843 | ENSP00000380921 |
| ENSP00000366843 | ENSP00000383503 |
| ENSP00000366843 | ENSP00000386394 |
| ENSP00000366843 | ENSP00000402240 |
| ENSP00000366843 | ENSP00000412566 |
| ENSP00000366843 | ENSP00000416599 |
| ENSP00000366843 | ENSP00000416959 |
| ENSP00000366863 | ENSP00000369351 |
| ENSP00000366863 | ENSP00000374213 |
| ENSP00000366863 | ENSP00000382177 |
| ENSP00000366915 | ENSP00000377969 |
| ENSP00000366936 | ENSP00000374328 |
| ENSP00000366953 | ENSP00000368438 |
| ENSP00000366974 | ENSP00000367024 |
| ENSP00000366974 | ENSP00000368438 |
| ENSP00000366974 | ENSP00000369411 |

|                 |                 |
|-----------------|-----------------|
| ENSP00000366974 | ENSP00000369716 |
| ENSP00000366974 | ENSP00000371546 |
| ENSP00000366974 | ENSP00000372023 |
| ENSP00000366974 | ENSP00000373340 |
| ENSP00000366974 | ENSP00000374152 |
| ENSP00000366974 | ENSP00000374213 |
| ENSP00000366974 | ENSP00000374280 |
| ENSP00000366974 | ENSP00000377747 |
| ENSP00000366974 | ENSP00000377793 |
| ENSP00000366974 | ENSP00000379607 |
| ENSP00000366974 | ENSP00000381657 |
| ENSP00000366974 | ENSP00000382562 |
| ENSP00000366974 | ENSP00000382688 |
| ENSP00000366974 | ENSP00000386759 |
| ENSP00000366974 | ENSP00000392617 |
| ENSP00000366974 | ENSP00000394791 |
| ENSP00000366974 | ENSP00000396704 |
| ENSP00000366974 | ENSP00000402515 |
| ENSP00000366974 | ENSP00000411409 |
| ENSP00000366977 | ENSP00000370410 |
| ENSP00000367029 | ENSP00000368984 |
| ENSP00000367029 | ENSP00000370589 |
| ENSP00000367029 | ENSP00000375863 |
| ENSP00000367029 | ENSP00000376309 |
| ENSP00000367029 | ENSP00000382492 |
| ENSP00000367029 | ENSP00000383503 |
| ENSP00000367029 | ENSP00000396937 |
| ENSP00000367029 | ENSP00000397636 |
| ENSP00000367029 | ENSP00000402338 |
| ENSP00000367029 | ENSP00000403852 |
| ENSP00000367029 | ENSP00000405636 |
| ENSP00000367029 | ENSP00000406293 |
| ENSP00000367029 | ENSP00000410530 |
| ENSP00000367029 | ENSP00000410954 |
| ENSP00000367029 | ENSP00000414110 |
| ENSP00000367029 | ENSP00000414187 |
| ENSP00000367029 | ENSP00000416599 |
| ENSP00000367030 | ENSP00000400476 |
| ENSP00000367030 | ENSP00000410833 |
| ENSP00000367034 | ENSP00000368438 |
| ENSP00000367034 | ENSP00000372023 |
| ENSP00000367034 | ENSP00000374213 |
| ENSP00000367034 | ENSP00000377793 |
| ENSP00000367034 | ENSP00000379607 |
| ENSP00000367034 | ENSP00000381657 |
| ENSP00000367034 | ENSP00000382688 |



|                 |                 |
|-----------------|-----------------|
| ENSP00000367034 | ENSP00000386759 |
| ENSP00000367034 | ENSP00000411409 |
| ENSP00000367064 | ENSP00000368755 |
| ENSP00000367079 | ENSP00000368612 |
| ENSP00000367079 | ENSP00000368686 |
| ENSP00000367079 | ENSP00000370377 |
| ENSP00000367079 | ENSP00000370589 |
| ENSP00000367079 | ENSP00000376946 |
| ENSP00000367079 | ENSP00000377527 |
| ENSP00000367079 | ENSP00000378306 |
| ENSP00000367079 | ENSP00000379430 |
| ENSP00000367079 | ENSP00000384015 |
| ENSP00000367079 | ENSP00000401371 |
| ENSP00000367079 | ENSP00000402240 |
| ENSP00000367197 | ENSP00000370410 |
| ENSP00000367197 | ENSP00000382177 |
| ENSP00000367208 | ENSP00000371451 |
| ENSP00000367208 | ENSP00000378517 |
| ENSP00000367208 | ENSP00000381970 |
| ENSP00000367208 | ENSP00000384109 |
| ENSP00000367208 | ENSP00000386239 |
| ENSP00000367208 | ENSP00000404381 |
| ENSP00000367208 | ENSP00000419361 |
| ENSP00000367265 | ENSP00000380921 |
| ENSP00000367276 | ENSP00000378529 |
| ENSP00000367346 | ENSP00000379430 |
| ENSP00000367398 | ENSP00000369257 |
| ENSP00000367406 | ENSP00000369695 |
| ENSP00000367408 | ENSP00000367972 |
| ENSP00000367408 | ENSP00000368190 |
| ENSP00000367408 | ENSP00000369312 |
| ENSP00000367408 | ENSP00000369400 |
| ENSP00000367408 | ENSP00000370003 |
| ENSP00000367408 | ENSP00000374455 |
| ENSP00000367408 | ENSP00000386722 |
| ENSP00000367408 | ENSP00000388373 |
| ENSP00000367408 | ENSP00000401435 |
| ENSP00000367439 | ENSP00000369391 |
| ENSP00000367439 | ENSP00000369411 |
| ENSP00000367439 | ENSP00000389182 |
| ENSP00000367439 | ENSP00000402338 |
| ENSP00000367439 | ENSP00000403833 |
| ENSP00000367439 | ENSP00000412566 |
| ENSP00000367440 | ENSP00000381891 |
| ENSP00000367440 | ENSP00000398789 |
| ENSP00000367440 | ENSP00000402316 |

|                 |                 |
|-----------------|-----------------|
| ENSP00000367454 | ENSP00000370408 |
| ENSP00000367454 | ENSP00000381237 |
| ENSP00000367454 | ENSP00000388340 |
| ENSP00000367498 | ENSP00000368140 |
| ENSP00000367498 | ENSP00000368438 |
| ENSP00000367498 | ENSP00000370083 |
| ENSP00000367498 | ENSP00000370119 |
| ENSP00000367498 | ENSP00000370607 |
| ENSP00000367498 | ENSP00000376946 |
| ENSP00000367527 | ENSP00000368349 |
| ENSP00000367527 | ENSP00000371475 |
| ENSP00000367527 | ENSP00000375809 |
| ENSP00000367570 | ENSP00000376204 |
| ENSP00000367615 | ENSP00000367923 |
| ENSP00000367615 | ENSP00000368438 |
| ENSP00000367615 | ENSP00000370194 |
| ENSP00000367615 | ENSP00000401508 |
| ENSP00000367637 | ENSP00000377617 |
| ENSP00000367637 | ENSP00000394071 |
| ENSP00000367637 | ENSP00000394382 |
| ENSP00000367637 | ENSP00000417190 |
| ENSP00000367637 | ENSP00000418661 |
| ENSP00000367697 | ENSP00000369513 |
| ENSP00000367705 | ENSP00000369695 |
| ENSP00000367705 | ENSP00000396439 |
| ENSP00000367705 | ENSP00000417132 |
| ENSP00000367705 | ENSP00000419494 |
| ENSP00000367715 | ENSP00000402240 |
| ENSP00000367721 | ENSP00000381863 |
| ENSP00000367721 | ENSP00000382779 |
| ENSP00000367766 | ENSP00000408910 |
| ENSP00000367770 | ENSP00000400932 |
| ENSP00000367787 | ENSP00000368349 |
| ENSP00000367787 | ENSP00000369411 |
| ENSP00000367787 | ENSP00000370151 |
| ENSP00000367797 | ENSP00000395535 |
| ENSP00000367808 | ENSP00000367910 |
| ENSP00000367808 | ENSP00000373952 |
| ENSP00000367808 | ENSP00000385021 |
| ENSP00000367835 | ENSP00000369736 |
| ENSP00000367835 | ENSP00000376973 |
| ENSP00000367835 | ENSP00000393953 |
| ENSP00000367841 | ENSP00000380467 |
| ENSP00000367841 | ENSP00000394085 |
| ENSP00000367878 | ENSP00000381045 |
| ENSP00000367910 | ENSP00000369497 |

|                 |                 |
|-----------------|-----------------|
| ENSP00000367910 | ENSP00000370616 |
| ENSP00000367910 | ENSP00000372316 |
| ENSP00000367910 | ENSP00000373952 |
| ENSP00000367910 | ENSP00000385021 |
| ENSP00000367923 | ENSP00000370883 |
| ENSP00000367923 | ENSP00000377446 |
| ENSP00000367923 | ENSP00000377527 |
| ENSP00000367923 | ENSP00000387262 |
| ENSP00000367923 | ENSP00000394382 |
| ENSP00000367934 | ENSP00000387262 |
| ENSP00000368017 | ENSP00000370256 |
| ENSP00000368066 | ENSP00000407401 |
| ENSP00000368119 | ENSP00000368589 |
| ENSP00000368140 | ENSP00000377640 |
| ENSP00000368140 | ENSP00000379568 |
| ENSP00000368140 | ENSP00000387262 |
| ENSP00000368140 | ENSP00000402084 |
| ENSP00000368190 | ENSP00000380921 |
| ENSP00000368190 | ENSP00000385899 |
| ENSP00000368226 | ENSP00000396452 |
| ENSP00000368253 | ENSP00000393154 |
| ENSP00000368332 | ENSP00000372023 |
| ENSP00000368349 | ENSP00000369335 |
| ENSP00000368349 | ENSP00000370151 |
| ENSP00000368349 | ENSP00000370376 |
| ENSP00000368349 | ENSP00000371475 |
| ENSP00000368349 | ENSP00000372023 |
| ENSP00000368349 | ENSP00000372316 |
| ENSP00000368349 | ENSP00000375809 |
| ENSP00000368349 | ENSP00000377914 |
| ENSP00000368349 | ENSP00000379607 |
| ENSP00000368349 | ENSP00000380718 |
| ENSP00000368349 | ENSP00000381657 |
| ENSP00000368349 | ENSP00000383986 |
| ENSP00000368349 | ENSP00000394649 |
| ENSP00000368349 | ENSP00000397644 |
| ENSP00000368349 | ENSP00000401018 |
| ENSP00000368349 | ENSP00000406490 |
| ENSP00000368349 | ENSP00000406868 |
| ENSP00000368349 | ENSP00000407047 |
| ENSP00000368349 | ENSP00000407401 |
| ENSP00000368389 | ENSP00000408426 |
| ENSP00000368438 | ENSP00000368646 |
| ENSP00000368438 | ENSP00000369075 |
| ENSP00000368438 | ENSP00000369335 |
| ENSP00000368438 | ENSP00000369411 |

|                 |                 |
|-----------------|-----------------|
| ENSP00000368438 | ENSP00000370150 |
| ENSP00000368438 | ENSP00000370151 |
| ENSP00000368438 | ENSP00000370222 |
| ENSP00000368438 | ENSP00000370968 |
| ENSP00000368438 | ENSP00000371475 |
| ENSP00000368438 | ENSP00000372023 |
| ENSP00000368438 | ENSP00000372316 |
| ENSP00000368438 | ENSP00000373354 |
| ENSP00000368438 | ENSP00000373952 |
| ENSP00000368438 | ENSP00000376204 |
| ENSP00000368438 | ENSP00000376445 |
| ENSP00000368438 | ENSP00000376534 |
| ENSP00000368438 | ENSP00000379607 |
| ENSP00000368438 | ENSP00000380460 |
| ENSP00000368438 | ENSP00000381290 |
| ENSP00000368438 | ENSP00000381657 |
| ENSP00000368438 | ENSP00000381863 |
| ENSP00000368438 | ENSP00000383986 |
| ENSP00000368438 | ENSP00000384109 |
| ENSP00000368438 | ENSP00000385021 |
| ENSP00000368438 | ENSP00000386186 |
| ENSP00000368438 | ENSP00000387982 |
| ENSP00000368438 | ENSP00000391944 |
| ENSP00000368438 | ENSP00000397644 |
| ENSP00000368438 | ENSP00000402515 |
| ENSP00000368438 | ENSP00000403817 |
| ENSP00000368438 | ENSP00000406490 |
| ENSP00000368438 | ENSP00000406888 |
| ENSP00000368438 | ENSP00000413720 |
| ENSP00000368438 | ENSP00000417281 |
| ENSP00000368439 | ENSP00000368605 |
| ENSP00000368439 | ENSP00000369860 |
| ENSP00000368439 | ENSP00000371888 |
| ENSP00000368439 | ENSP00000376268 |
| ENSP00000368439 | ENSP00000386722 |
| ENSP00000368523 | ENSP00000368565 |
| ENSP00000368565 | ENSP00000369897 |
| ENSP00000368565 | ENSP00000371451 |
| ENSP00000368565 | ENSP00000376268 |
| ENSP00000368565 | ENSP00000377617 |
| ENSP00000368565 | ENSP00000377640 |
| ENSP00000368565 | ENSP00000382595 |
| ENSP00000368565 | ENSP00000384211 |
| ENSP00000368565 | ENSP00000386717 |
| ENSP00000368565 | ENSP00000391944 |
| ENSP00000368565 | ENSP00000408058 |

|                 |                 |
|-----------------|-----------------|
| ENSP00000368589 | ENSP00000420608 |
| ENSP00000368612 | ENSP00000388872 |
| ENSP00000368646 | ENSP00000369335 |
| ENSP00000368646 | ENSP00000369411 |
| ENSP00000368646 | ENSP00000370151 |
| ENSP00000368646 | ENSP00000371475 |
| ENSP00000368646 | ENSP00000372023 |
| ENSP00000368646 | ENSP00000373477 |
| ENSP00000368646 | ENSP00000379607 |
| ENSP00000368686 | ENSP00000392601 |
| ENSP00000368686 | ENSP00000414187 |
| ENSP00000368686 | ENSP00000419494 |
| ENSP00000368698 | ENSP00000384651 |
| ENSP00000368698 | ENSP00000387262 |
| ENSP00000368698 | ENSP00000400806 |
| ENSP00000368699 | ENSP00000370737 |
| ENSP00000368699 | ENSP00000375809 |
| ENSP00000368699 | ENSP00000376758 |
| ENSP00000368699 | ENSP00000377040 |
| ENSP00000368699 | ENSP00000377865 |
| ENSP00000368699 | ENSP00000377914 |
| ENSP00000368699 | ENSP00000378160 |
| ENSP00000368699 | ENSP00000383719 |
| ENSP00000368755 | ENSP00000369500 |
| ENSP00000368755 | ENSP00000382670 |
| ENSP00000368767 | ENSP00000374455 |
| ENSP00000368790 | ENSP00000379339 |
| ENSP00000368790 | ENSP00000393241 |
| ENSP00000368790 | ENSP00000403175 |
| ENSP00000368790 | ENSP00000412583 |
| ENSP00000368790 | ENSP00000416110 |
| ENSP00000368790 | ENSP00000420714 |
| ENSP00000368797 | ENSP00000379457 |
| ENSP00000368797 | ENSP00000419740 |
| ENSP00000368801 | ENSP00000369218 |
| ENSP00000368801 | ENSP00000378165 |
| ENSP00000368801 | ENSP00000381031 |
| ENSP00000368801 | ENSP00000381290 |
| ENSP00000368801 | ENSP00000381565 |
| ENSP00000368801 | ENSP00000383059 |
| ENSP00000368801 | ENSP00000391774 |
| ENSP00000368801 | ENSP00000412566 |
| ENSP00000368824 | ENSP00000380450 |
| ENSP00000368824 | ENSP00000399511 |
| ENSP00000368887 | ENSP00000370258 |
| ENSP00000368887 | ENSP00000370589 |

|                 |                 |
|-----------------|-----------------|
| ENSP00000368887 | ENSP00000372827 |
| ENSP00000368887 | ENSP00000374219 |
| ENSP00000368887 | ENSP00000377640 |
| ENSP00000368887 | ENSP00000380982 |
| ENSP00000368887 | ENSP00000382392 |
| ENSP00000368887 | ENSP00000394400 |
| ENSP00000368887 | ENSP00000399530 |
| ENSP00000368887 | ENSP00000400626 |
| ENSP00000368887 | ENSP00000412310 |
| ENSP00000368887 | ENSP00000417281 |
| ENSP00000368887 | ENSP00000417763 |
| ENSP00000368927 | ENSP00000369519 |
| ENSP00000368927 | ENSP00000417229 |
| ENSP00000368976 | ENSP00000374566 |
| ENSP00000368976 | ENSP00000377793 |
| ENSP00000368976 | ENSP00000382562 |
| ENSP00000368976 | ENSP00000383145 |
| ENSP00000368984 | ENSP00000372827 |
| ENSP00000368984 | ENSP00000379607 |
| ENSP00000368984 | ENSP00000388340 |
| ENSP00000368984 | ENSP00000394400 |
| ENSP00000368984 | ENSP00000398597 |
| ENSP00000368984 | ENSP00000399530 |
| ENSP00000368984 | ENSP00000400626 |
| ENSP00000368984 | ENSP00000412310 |
| ENSP00000369038 | ENSP00000379607 |
| ENSP00000369042 | ENSP00000369335 |
| ENSP00000369042 | ENSP00000371155 |
| ENSP00000369042 | ENSP00000375730 |
| ENSP00000369042 | ENSP00000380982 |
| ENSP00000369042 | ENSP00000382177 |
| ENSP00000369042 | ENSP00000386992 |
| ENSP00000369042 | ENSP00000389103 |
| ENSP00000369080 | ENSP00000370616 |
| ENSP00000369162 | ENSP00000384048 |
| ENSP00000369218 | ENSP00000379607 |
| ENSP00000369218 | ENSP00000417748 |
| ENSP00000369257 | ENSP00000370023 |
| ENSP00000369257 | ENSP00000384792 |
| ENSP00000369270 | ENSP00000384179 |
| ENSP00000369274 | ENSP00000370930 |
| ENSP00000369274 | ENSP00000381045 |
| ENSP00000369325 | ENSP00000395535 |
| ENSP00000369335 | ENSP00000369411 |
| ENSP00000369335 | ENSP00000369716 |
| ENSP00000369335 | ENSP00000370150 |

|                 |                 |
|-----------------|-----------------|
| ENSP00000369335 | ENSP00000370151 |
| ENSP00000369335 | ENSP00000371475 |
| ENSP00000369335 | ENSP00000373060 |
| ENSP00000369335 | ENSP00000373474 |
| ENSP00000369335 | ENSP00000374213 |
| ENSP00000369335 | ENSP00000375730 |
| ENSP00000369335 | ENSP00000375809 |
| ENSP00000369335 | ENSP00000376534 |
| ENSP00000369335 | ENSP00000377527 |
| ENSP00000369335 | ENSP00000377655 |
| ENSP00000369335 | ENSP00000377747 |
| ENSP00000369335 | ENSP00000379933 |
| ENSP00000369335 | ENSP00000380460 |
| ENSP00000369335 | ENSP00000380504 |
| ENSP00000369335 | ENSP00000381220 |
| ENSP00000369335 | ENSP00000383719 |
| ENSP00000369335 | ENSP00000384048 |
| ENSP00000369335 | ENSP00000384597 |
| ENSP00000369335 | ENSP00000386520 |
| ENSP00000369335 | ENSP00000387429 |
| ENSP00000369335 | ENSP00000391756 |
| ENSP00000369335 | ENSP00000392028 |
| ENSP00000369335 | ENSP00000392617 |
| ENSP00000369335 | ENSP00000394649 |
| ENSP00000369335 | ENSP00000394791 |
| ENSP00000369335 | ENSP00000396484 |
| ENSP00000369335 | ENSP00000396704 |
| ENSP00000369335 | ENSP00000402515 |
| ENSP00000369335 | ENSP00000402527 |
| ENSP00000369335 | ENSP00000404318 |
| ENSP00000369335 | ENSP00000406490 |
| ENSP00000369335 | ENSP00000406868 |
| ENSP00000369335 | ENSP00000407047 |
| ENSP00000369335 | ENSP00000409167 |
| ENSP00000369335 | ENSP00000415212 |
| ENSP00000369335 | ENSP00000416511 |
| ENSP00000369335 | ENSP00000417229 |
| ENSP00000369335 | ENSP00000418661 |
| ENSP00000369351 | ENSP00000376309 |
| ENSP00000369391 | ENSP00000389182 |
| ENSP00000369391 | ENSP00000403833 |
| ENSP00000369396 | ENSP00000379290 |
| ENSP00000369400 | ENSP00000370410 |
| ENSP00000369411 | ENSP00000370150 |
| ENSP00000369411 | ENSP00000370151 |
| ENSP00000369411 | ENSP00000371419 |

|                 |                 |
|-----------------|-----------------|
| ENSP00000369411 | ENSP00000372023 |
| ENSP00000369411 | ENSP00000377384 |
| ENSP00000369411 | ENSP00000377793 |
| ENSP00000369411 | ENSP00000380460 |
| ENSP00000369411 | ENSP00000381290 |
| ENSP00000369411 | ENSP00000382562 |
| ENSP00000369411 | ENSP00000384048 |
| ENSP00000369411 | ENSP00000396704 |
| ENSP00000369411 | ENSP00000420588 |
| ENSP00000369456 | ENSP00000392859 |
| ENSP00000369497 | ENSP00000372023 |
| ENSP00000369497 | ENSP00000401566 |
| ENSP00000369497 | ENSP00000406490 |
| ENSP00000369531 | ENSP00000376758 |
| ENSP00000369531 | ENSP00000396937 |
| ENSP00000369531 | ENSP00000418734 |
| ENSP00000369614 | ENSP00000374443 |
| ENSP00000369614 | ENSP00000400806 |
| ENSP00000369695 | ENSP00000374213 |
| ENSP00000369695 | ENSP00000377969 |
| ENSP00000369695 | ENSP00000380054 |
| ENSP00000369695 | ENSP00000381657 |
| ENSP00000369695 | ENSP00000392617 |
| ENSP00000369695 | ENSP00000402338 |
| ENSP00000369695 | ENSP00000403852 |
| ENSP00000369695 | ENSP00000418734 |
| ENSP00000369699 | ENSP00000409315 |
| ENSP00000369716 | ENSP00000374280 |
| ENSP00000369716 | ENSP00000377262 |
| ENSP00000369716 | ENSP00000378338 |
| ENSP00000369716 | ENSP00000386759 |
| ENSP00000369716 | ENSP00000387262 |
| ENSP00000369736 | ENSP00000372694 |
| ENSP00000369736 | ENSP00000412319 |
| ENSP00000369736 | ENSP00000415678 |
| ENSP00000369757 | ENSP00000370215 |
| ENSP00000369757 | ENSP00000371888 |
| ENSP00000369757 | ENSP00000373404 |
| ENSP00000369757 | ENSP00000375730 |
| ENSP00000369757 | ENSP00000376946 |
| ENSP00000369757 | ENSP00000377640 |
| ENSP00000369757 | ENSP00000377865 |
| ENSP00000369757 | ENSP00000379339 |
| ENSP00000369757 | ENSP00000379607 |
| ENSP00000369757 | ENSP00000379888 |
| ENSP00000369757 | ENSP00000380129 |



|                 |                 |
|-----------------|-----------------|
| ENSP00000369757 | ENSP00000380156 |
| ENSP00000369757 | ENSP00000380460 |
| ENSP00000369757 | ENSP00000386156 |
| ENSP00000369757 | ENSP00000386717 |
| ENSP00000369757 | ENSP00000386992 |
| ENSP00000369757 | ENSP00000389103 |
| ENSP00000369757 | ENSP00000391723 |
| ENSP00000369757 | ENSP00000393241 |
| ENSP00000369757 | ENSP00000402338 |
| ENSP00000369757 | ENSP00000403175 |
| ENSP00000369757 | ENSP00000408058 |
| ENSP00000369757 | ENSP00000412583 |
| ENSP00000369757 | ENSP00000414321 |
| ENSP00000369757 | ENSP00000416110 |
| ENSP00000369757 | ENSP00000420714 |
| ENSP00000369810 | ENSP00000380450 |
| ENSP00000369810 | ENSP00000390783 |
| ENSP00000369816 | ENSP00000370883 |
| ENSP00000369816 | ENSP00000381045 |
| ENSP00000369820 | ENSP00000380793 |
| ENSP00000369820 | ENSP00000420037 |
| ENSP00000369860 | ENSP00000369862 |
| ENSP00000369860 | ENSP00000376268 |
| ENSP00000369860 | ENSP00000377944 |
| ENSP00000369860 | ENSP00000385746 |
| ENSP00000369862 | ENSP00000411584 |
| ENSP00000369863 | ENSP00000411409 |
| ENSP00000369871 | ENSP00000407879 |
| ENSP00000369871 | ENSP00000407964 |
| ENSP00000369887 | ENSP00000379607 |
| ENSP00000369895 | ENSP00000370083 |
| ENSP00000369895 | ENSP00000370119 |
| ENSP00000369897 | ENSP00000370376 |
| ENSP00000369897 | ENSP00000381654 |
| ENSP00000369897 | ENSP00000389649 |
| ENSP00000369897 | ENSP00000403817 |
| ENSP00000369965 | ENSP00000379888 |
| ENSP00000369965 | ENSP00000386717 |
| ENSP00000369965 | ENSP00000389103 |
| ENSP00000369965 | ENSP00000403817 |
| ENSP00000370003 | ENSP00000381031 |
| ENSP00000370023 | ENSP00000372445 |
| ENSP00000370023 | ENSP00000374280 |
| ENSP00000370023 | ENSP00000374455 |
| ENSP00000370023 | ENSP00000381891 |
| ENSP00000370083 | ENSP00000370119 |

|                 |                 |
|-----------------|-----------------|
| ENSP00000370083 | ENSP00000370589 |
| ENSP00000370083 | ENSP00000370968 |
| ENSP00000370083 | ENSP00000377617 |
| ENSP00000370083 | ENSP00000380523 |
| ENSP00000370083 | ENSP00000381031 |
| ENSP00000370083 | ENSP00000387170 |
| ENSP00000370083 | ENSP00000392270 |
| ENSP00000370083 | ENSP00000400591 |
| ENSP00000370083 | ENSP00000412566 |
| ENSP00000370083 | ENSP00000414006 |
| ENSP00000370119 | ENSP00000370589 |
| ENSP00000370119 | ENSP00000370968 |
| ENSP00000370119 | ENSP00000375863 |
| ENSP00000370119 | ENSP00000377617 |
| ENSP00000370119 | ENSP00000380523 |
| ENSP00000370119 | ENSP00000387170 |
| ENSP00000370119 | ENSP00000392270 |
| ENSP00000370119 | ENSP00000400591 |
| ENSP00000370119 | ENSP00000404121 |
| ENSP00000370119 | ENSP00000410758 |
| ENSP00000370119 | ENSP00000412566 |
| ENSP00000370125 | ENSP00000377218 |
| ENSP00000370150 | ENSP00000371475 |
| ENSP00000370150 | ENSP00000372023 |
| ENSP00000370150 | ENSP00000380504 |
| ENSP00000370151 | ENSP00000371475 |
| ENSP00000370151 | ENSP00000372023 |
| ENSP00000370151 | ENSP00000373060 |
| ENSP00000370151 | ENSP00000373700 |
| ENSP00000370151 | ENSP00000375809 |
| ENSP00000370151 | ENSP00000377384 |
| ENSP00000370151 | ENSP00000378529 |
| ENSP00000370151 | ENSP00000380460 |
| ENSP00000370151 | ENSP00000381657 |
| ENSP00000370151 | ENSP00000382562 |
| ENSP00000370151 | ENSP00000384048 |
| ENSP00000370151 | ENSP00000384490 |
| ENSP00000370151 | ENSP00000387429 |
| ENSP00000370151 | ENSP00000394649 |
| ENSP00000370151 | ENSP00000396484 |
| ENSP00000370151 | ENSP00000396704 |
| ENSP00000370151 | ENSP00000404318 |
| ENSP00000370151 | ENSP00000406868 |
| ENSP00000370151 | ENSP00000407047 |
| ENSP00000370151 | ENSP00000409167 |
| ENSP00000370151 | ENSP00000415212 |

|                 |                 |
|-----------------|-----------------|
| ENSP00000370151 | ENSP00000416511 |
| ENSP00000370194 | ENSP00000387019 |
| ENSP00000370222 | ENSP00000372023 |
| ENSP00000370222 | ENSP00000384211 |
| ENSP00000370258 | ENSP00000371236 |
| ENSP00000370258 | ENSP00000377411 |
| ENSP00000370258 | ENSP00000378529 |
| ENSP00000370258 | ENSP00000379888 |
| ENSP00000370258 | ENSP00000384302 |
| ENSP00000370258 | ENSP00000387170 |
| ENSP00000370258 | ENSP00000416892 |
| ENSP00000370376 | ENSP00000379607 |
| ENSP00000370376 | ENSP00000391944 |
| ENSP00000370376 | ENSP00000403817 |
| ENSP00000370377 | ENSP00000377865 |
| ENSP00000370377 | ENSP00000394382 |
| ENSP00000370377 | ENSP00000394791 |
| ENSP00000370408 | ENSP00000396439 |
| ENSP00000370408 | ENSP00000419494 |
| ENSP00000370410 | ENSP00000382595 |
| ENSP00000370410 | ENSP00000384391 |
| ENSP00000370410 | ENSP00000393860 |
| ENSP00000370410 | ENSP00000403636 |
| ENSP00000370414 | ENSP00000389649 |
| ENSP00000370421 | ENSP00000373700 |
| ENSP00000370421 | ENSP00000381031 |
| ENSP00000370460 | ENSP00000374219 |
| ENSP00000370460 | ENSP00000380460 |
| ENSP00000370460 | ENSP00000404151 |
| ENSP00000370460 | ENSP00000412566 |
| ENSP00000370517 | ENSP00000377496 |
| ENSP00000370517 | ENSP00000379678 |
| ENSP00000370517 | ENSP00000379933 |
| ENSP00000370517 | ENSP00000386394 |
| ENSP00000370521 | ENSP00000377496 |
| ENSP00000370555 | ENSP00000410758 |
| ENSP00000370571 | ENSP00000378890 |
| ENSP00000370589 | ENSP00000370968 |
| ENSP00000370589 | ENSP00000371101 |
| ENSP00000370589 | ENSP00000371169 |
| ENSP00000370589 | ENSP00000371201 |
| ENSP00000370589 | ENSP00000371634 |
| ENSP00000370589 | ENSP00000372199 |
| ENSP00000370589 | ENSP00000372695 |
| ENSP00000370589 | ENSP00000375730 |
| ENSP00000370589 | ENSP00000376410 |

|                 |                 |
|-----------------|-----------------|
| ENSP00000370589 | ENSP00000377262 |
| ENSP00000370589 | ENSP00000377486 |
| ENSP00000370589 | ENSP00000377865 |
| ENSP00000370589 | ENSP00000377944 |
| ENSP00000370589 | ENSP00000379607 |
| ENSP00000370589 | ENSP00000379888 |
| ENSP00000370589 | ENSP00000380982 |
| ENSP00000370589 | ENSP00000382392 |
| ENSP00000370589 | ENSP00000384302 |
| ENSP00000370589 | ENSP00000386134 |
| ENSP00000370589 | ENSP00000386717 |
| ENSP00000370589 | ENSP00000388464 |
| ENSP00000370589 | ENSP00000389103 |
| ENSP00000370589 | ENSP00000392859 |
| ENSP00000370589 | ENSP00000393393 |
| ENSP00000370589 | ENSP00000396704 |
| ENSP00000370589 | ENSP00000397351 |
| ENSP00000370589 | ENSP00000399454 |
| ENSP00000370589 | ENSP00000402338 |
| ENSP00000370589 | ENSP00000402869 |
| ENSP00000370589 | ENSP00000404121 |
| ENSP00000370589 | ENSP00000405614 |
| ENSP00000370589 | ENSP00000406888 |
| ENSP00000370589 | ENSP00000410396 |
| ENSP00000370589 | ENSP00000417229 |
| ENSP00000370589 | ENSP00000419740 |
| ENSP00000370607 | ENSP00000385083 |
| ENSP00000370607 | ENSP00000396704 |
| ENSP00000370611 | ENSP00000374213 |
| ENSP00000370616 | ENSP00000377303 |
| ENSP00000370616 | ENSP00000378394 |
| ENSP00000370616 | ENSP00000386394 |
| ENSP00000370658 | ENSP00000381031 |
| ENSP00000370718 | ENSP00000373404 |
| ENSP00000370718 | ENSP00000377640 |
| ENSP00000370718 | ENSP00000388340 |
| ENSP00000370719 | ENSP00000376776 |
| ENSP00000370719 | ENSP00000379607 |
| ENSP00000370719 | ENSP00000380921 |
| ENSP00000370719 | ENSP00000384179 |
| ENSP00000370719 | ENSP00000384675 |
| ENSP00000370719 | ENSP00000386722 |
| ENSP00000370719 | ENSP00000388373 |
| ENSP00000370719 | ENSP00000408910 |
| ENSP00000370719 | ENSP00000413625 |
| ENSP00000370737 | ENSP00000373039 |

|                 |                 |
|-----------------|-----------------|
| ENSP00000370737 | ENSP00000396152 |
| ENSP00000370737 | ENSP00000410416 |
| ENSP00000370741 | ENSP00000377769 |
| ENSP00000370741 | ENSP00000377954 |
| ENSP00000370741 | ENSP00000419740 |
| ENSP00000370839 | ENSP00000371512 |
| ENSP00000370883 | ENSP00000381045 |
| ENSP00000370930 | ENSP00000387262 |
| ENSP00000370930 | ENSP00000417602 |
| ENSP00000370935 | ENSP00000384053 |
| ENSP00000370968 | ENSP00000379607 |
| ENSP00000370968 | ENSP00000380982 |
| ENSP00000370968 | ENSP00000382392 |
| ENSP00000370968 | ENSP00000383503 |
| ENSP00000370968 | ENSP00000384302 |
| ENSP00000370968 | ENSP00000386759 |
| ENSP00000370968 | ENSP00000392601 |
| ENSP00000370968 | ENSP00000397636 |
| ENSP00000370968 | ENSP00000405636 |
| ENSP00000370968 | ENSP00000406293 |
| ENSP00000370968 | ENSP00000410530 |
| ENSP00000370968 | ENSP00000410954 |
| ENSP00000370968 | ENSP00000414110 |
| ENSP00000370968 | ENSP00000416599 |
| ENSP00000371101 | ENSP00000372199 |
| ENSP00000371101 | ENSP00000372695 |
| ENSP00000371101 | ENSP00000379888 |
| ENSP00000371101 | ENSP00000380495 |
| ENSP00000371101 | ENSP00000386134 |
| ENSP00000371101 | ENSP00000399454 |
| ENSP00000371101 | ENSP00000402869 |
| ENSP00000371101 | ENSP00000405614 |
| ENSP00000371155 | ENSP00000382779 |
| ENSP00000371155 | ENSP00000397441 |
| ENSP00000371155 | ENSP00000403536 |
| ENSP00000371169 | ENSP00000379888 |
| ENSP00000371169 | ENSP00000384302 |
| ENSP00000371169 | ENSP00000386134 |
| ENSP00000371201 | ENSP00000377640 |
| ENSP00000371201 | ENSP00000380982 |
| ENSP00000371201 | ENSP00000401508 |
| ENSP00000371201 | ENSP00000402338 |
| ENSP00000371236 | ENSP00000382595 |
| ENSP00000371236 | ENSP00000417229 |
| ENSP00000371236 | ENSP00000417764 |
| ENSP00000371308 | ENSP00000374443 |

|                 |                 |
|-----------------|-----------------|
| ENSP00000371308 | ENSP00000382271 |
| ENSP00000371341 | ENSP00000373700 |
| ENSP00000371341 | ENSP00000379228 |
| ENSP00000371341 | ENSP00000386161 |
| ENSP00000371341 | ENSP00000405963 |
| ENSP00000371419 | ENSP00000384408 |
| ENSP00000371451 | ENSP00000381003 |
| ENSP00000371475 | ENSP00000372023 |
| ENSP00000371475 | ENSP00000373060 |
| ENSP00000371475 | ENSP00000375809 |
| ENSP00000371475 | ENSP00000377655 |
| ENSP00000371475 | ENSP00000380460 |
| ENSP00000371475 | ENSP00000381657 |
| ENSP00000371475 | ENSP00000384015 |
| ENSP00000371475 | ENSP00000384048 |
| ENSP00000371475 | ENSP00000402084 |
| ENSP00000371475 | ENSP00000402527 |
| ENSP00000371475 | ENSP00000408020 |
| ENSP00000371475 | ENSP00000409167 |
| ENSP00000371546 | ENSP00000382688 |
| ENSP00000371546 | ENSP00000382779 |
| ENSP00000371546 | ENSP00000397598 |
| ENSP00000371546 | ENSP00000401371 |
| ENSP00000371546 | ENSP00000410758 |
| ENSP00000371634 | ENSP00000379607 |
| ENSP00000371634 | ENSP00000384490 |
| ENSP00000371724 | ENSP00000381045 |
| ENSP00000371729 | ENSP00000383503 |
| ENSP00000371729 | ENSP00000416599 |
| ENSP00000371800 | ENSP00000403852 |
| ENSP00000371829 | ENSP00000381045 |
| ENSP00000371846 | ENSP00000385722 |
| ENSP00000371888 | ENSP00000375881 |
| ENSP00000371888 | ENSP00000376946 |
| ENSP00000371888 | ENSP00000379093 |
| ENSP00000371888 | ENSP00000379908 |
| ENSP00000371888 | ENSP00000381198 |
| ENSP00000371888 | ENSP00000383402 |
| ENSP00000371888 | ENSP00000386722 |
| ENSP00000371888 | ENSP00000394071 |
| ENSP00000371888 | ENSP00000394085 |
| ENSP00000371888 | ENSP00000417963 |
| ENSP00000372023 | ENSP00000373060 |
| ENSP00000372023 | ENSP00000373702 |
| ENSP00000372023 | ENSP00000374240 |
| ENSP00000372023 | ENSP00000377384 |

|                 |                 |
|-----------------|-----------------|
| ENSP00000372023 | ENSP00000377747 |
| ENSP00000372023 | ENSP00000378306 |
| ENSP00000372023 | ENSP00000378350 |
| ENSP00000372023 | ENSP00000381657 |
| ENSP00000372023 | ENSP00000381932 |
| ENSP00000372023 | ENSP00000391249 |
| ENSP00000372023 | ENSP00000392028 |
| ENSP00000372023 | ENSP00000392270 |
| ENSP00000372023 | ENSP00000397644 |
| ENSP00000372023 | ENSP00000402084 |
| ENSP00000372023 | ENSP00000402515 |
| ENSP00000372023 | ENSP00000411409 |
| ENSP00000372023 | ENSP00000417281 |
| ENSP00000372023 | ENSP00000417963 |
| ENSP00000372093 | ENSP00000386621 |
| ENSP00000372093 | ENSP00000386717 |
| ENSP00000372199 | ENSP00000374390 |
| ENSP00000372199 | ENSP00000379888 |
| ENSP00000372199 | ENSP00000380156 |
| ENSP00000372199 | ENSP00000380495 |
| ENSP00000372199 | ENSP00000380982 |
| ENSP00000372199 | ENSP00000382392 |
| ENSP00000372199 | ENSP00000387262 |
| ENSP00000372199 | ENSP00000397009 |
| ENSP00000372316 | ENSP00000373952 |
| ENSP00000372316 | ENSP00000394649 |
| ENSP00000372316 | ENSP00000406868 |
| ENSP00000372326 | ENSP00000387262 |
| ENSP00000372445 | ENSP00000379339 |
| ENSP00000372445 | ENSP00000380718 |
| ENSP00000372445 | ENSP00000420714 |
| ENSP00000372694 | ENSP00000374213 |
| ENSP00000372694 | ENSP00000374566 |
| ENSP00000372694 | ENSP00000376946 |
| ENSP00000372694 | ENSP00000377793 |
| ENSP00000372694 | ENSP00000382562 |
| ENSP00000372695 | ENSP00000376758 |
| ENSP00000372695 | ENSP00000384302 |
| ENSP00000372695 | ENSP00000410396 |
| ENSP00000372697 | ENSP00000402698 |
| ENSP00000372700 | ENSP00000379836 |
| ENSP00000372703 | ENSP00000379372 |
| ENSP00000372720 | ENSP00000397441 |
| ENSP00000372789 | ENSP00000413319 |
| ENSP00000372815 | ENSP00000396688 |
| ENSP00000372827 | ENSP00000380460 |

|                 |                 |
|-----------------|-----------------|
| ENSP00000372827 | ENSP00000402338 |
| ENSP00000372883 | ENSP00000373715 |
| ENSP00000372883 | ENSP00000376973 |
| ENSP00000372883 | ENSP00000398597 |
| ENSP00000373039 | ENSP00000376758 |
| ENSP00000373039 | ENSP00000377040 |
| ENSP00000373039 | ENSP00000377865 |
| ENSP00000373039 | ENSP00000377914 |
| ENSP00000373039 | ENSP00000378160 |
| ENSP00000373039 | ENSP00000383719 |
| ENSP00000373060 | ENSP00000381657 |
| ENSP00000373060 | ENSP00000394394 |
| ENSP00000373060 | ENSP00000396704 |
| ENSP00000373060 | ENSP00000400806 |
| ENSP00000373060 | ENSP00000417281 |
| ENSP00000373082 | ENSP00000375809 |
| ENSP00000373082 | ENSP00000377944 |
| ENSP00000373082 | ENSP00000391944 |
| ENSP00000373090 | ENSP00000377640 |
| ENSP00000373090 | ENSP00000379888 |
| ENSP00000373090 | ENSP00000380982 |
| ENSP00000373090 | ENSP00000382392 |
| ENSP00000373090 | ENSP00000389103 |
| ENSP00000373090 | ENSP00000402338 |
| ENSP00000373090 | ENSP00000419740 |
| ENSP00000373107 | ENSP00000391723 |
| ENSP00000373167 | ENSP00000418070 |
| ENSP00000373215 | ENSP00000386959 |
| ENSP00000373272 | ENSP00000379144 |
| ENSP00000373301 | ENSP00000384675 |
| ENSP00000373340 | ENSP00000382688 |
| ENSP00000373347 | ENSP00000399511 |
| ENSP00000373354 | ENSP00000384109 |
| ENSP00000373354 | ENSP00000386759 |
| ENSP00000373363 | ENSP00000375730 |
| ENSP00000373363 | ENSP00000408910 |
| ENSP00000373370 | ENSP00000379607 |
| ENSP00000373399 | ENSP00000378306 |
| ENSP00000373399 | ENSP00000389934 |
| ENSP00000373404 | ENSP00000375730 |
| ENSP00000373404 | ENSP00000377486 |
| ENSP00000373404 | ENSP00000377617 |
| ENSP00000373404 | ENSP00000377640 |
| ENSP00000373404 | ENSP00000377865 |
| ENSP00000373404 | ENSP00000378160 |
| ENSP00000373404 | ENSP00000379888 |



|                 |                 |
|-----------------|-----------------|
| ENSP00000373404 | ENSP00000380156 |
| ENSP00000373404 | ENSP00000380982 |
| ENSP00000373404 | ENSP00000386717 |
| ENSP00000373404 | ENSP00000388330 |
| ENSP00000373404 | ENSP00000389103 |
| ENSP00000373404 | ENSP00000393241 |
| ENSP00000373404 | ENSP00000393393 |
| ENSP00000373404 | ENSP00000403175 |
| ENSP00000373404 | ENSP00000403852 |
| ENSP00000373404 | ENSP00000408058 |
| ENSP00000373404 | ENSP00000412583 |
| ENSP00000373404 | ENSP00000414321 |
| ENSP00000373404 | ENSP00000416110 |
| ENSP00000373404 | ENSP00000417229 |
| ENSP00000373509 | ENSP00000398105 |
| ENSP00000373566 | ENSP00000386722 |
| ENSP00000373600 | ENSP00000380431 |
| ENSP00000373600 | ENSP00000381293 |
| ENSP00000373657 | ENSP00000379607 |
| ENSP00000373700 | ENSP00000375986 |
| ENSP00000373700 | ENSP00000377047 |
| ENSP00000373700 | ENSP00000379372 |
| ENSP00000373700 | ENSP00000382423 |
| ENSP00000373702 | ENSP00000375986 |
| ENSP00000373702 | ENSP00000401445 |
| ENSP00000373715 | ENSP00000391723 |
| ENSP00000373715 | ENSP00000401371 |
| ENSP00000373715 | ENSP00000403345 |
| ENSP00000373715 | ENSP00000406280 |
| ENSP00000373715 | ENSP00000414006 |
| ENSP00000373715 | ENSP00000414634 |
| ENSP00000373918 | ENSP00000391944 |
| ENSP00000373952 | ENSP00000385021 |
| ENSP00000373979 | ENSP00000376871 |
| ENSP00000373979 | ENSP00000402935 |
| ENSP00000374069 | ENSP00000379933 |
| ENSP00000374213 | ENSP00000374280 |
| ENSP00000374213 | ENSP00000375986 |
| ENSP00000374213 | ENSP00000376204 |
| ENSP00000374213 | ENSP00000379217 |
| ENSP00000374213 | ENSP00000380460 |
| ENSP00000374213 | ENSP00000381657 |
| ENSP00000374213 | ENSP00000382562 |
| ENSP00000374213 | ENSP00000382688 |
| ENSP00000374213 | ENSP00000386759 |
| ENSP00000374213 | ENSP00000390475 |

|                 |                 |
|-----------------|-----------------|
| ENSP00000374213 | ENSP00000402240 |
| ENSP00000374213 | ENSP00000406293 |
| ENSP00000374213 | ENSP00000412319 |
| ENSP00000374213 | ENSP00000415678 |
| ENSP00000374213 | ENSP00000418734 |
| ENSP00000374280 | ENSP00000374529 |
| ENSP00000374280 | ENSP00000377747 |
| ENSP00000374280 | ENSP00000379217 |
| ENSP00000374280 | ENSP00000386759 |
| ENSP00000374280 | ENSP00000390475 |
| ENSP00000374280 | ENSP00000392028 |
| ENSP00000374280 | ENSP00000402240 |
| ENSP00000374328 | ENSP00000391944 |
| ENSP00000374328 | ENSP00000392330 |
| ENSP00000374399 | ENSP00000380460 |
| ENSP00000374399 | ENSP00000394869 |
| ENSP00000374399 | ENSP00000401371 |
| ENSP00000374424 | ENSP00000413625 |
| ENSP00000374455 | ENSP00000380921 |
| ENSP00000374455 | ENSP00000382064 |
| ENSP00000374455 | ENSP00000391944 |
| ENSP00000374455 | ENSP00000419740 |
| ENSP00000374467 | ENSP00000380271 |
| ENSP00000374529 | ENSP00000381657 |
| ENSP00000374529 | ENSP00000390783 |
| ENSP00000374552 | ENSP00000376445 |
| ENSP00000374566 | ENSP00000378529 |
| ENSP00000374566 | ENSP00000412319 |
| ENSP00000374566 | ENSP00000415678 |
| ENSP00000375097 | ENSP00000406490 |
| ENSP00000375730 | ENSP00000377486 |
| ENSP00000375730 | ENSP00000377640 |
| ENSP00000375730 | ENSP00000377865 |
| ENSP00000375730 | ENSP00000378160 |
| ENSP00000375730 | ENSP00000379607 |
| ENSP00000375730 | ENSP00000379888 |
| ENSP00000375730 | ENSP00000380156 |
| ENSP00000375730 | ENSP00000380982 |
| ENSP00000375730 | ENSP00000386717 |
| ENSP00000375730 | ENSP00000389103 |
| ENSP00000375730 | ENSP00000393241 |
| ENSP00000375730 | ENSP00000393393 |
| ENSP00000375730 | ENSP00000402338 |
| ENSP00000375730 | ENSP00000403175 |
| ENSP00000375730 | ENSP00000412583 |
| ENSP00000375730 | ENSP00000414321 |

|                 |                 |
|-----------------|-----------------|
| ENSP00000375730 | ENSP00000416110 |
| ENSP00000375809 | ENSP00000382562 |
| ENSP00000375809 | ENSP00000388872 |
| ENSP00000375809 | ENSP00000389065 |
| ENSP00000375809 | ENSP00000396452 |
| ENSP00000375809 | ENSP00000411327 |
| ENSP00000375809 | ENSP00000412553 |
| ENSP00000375809 | ENSP00000413319 |
| ENSP00000375809 | ENSP00000414373 |
| ENSP00000375857 | ENSP00000381098 |
| ENSP00000375857 | ENSP00000408792 |
| ENSP00000375857 | ENSP00000414670 |
| ENSP00000375863 | ENSP00000378165 |
| ENSP00000375863 | ENSP00000378180 |
| ENSP00000375863 | ENSP00000379607 |
| ENSP00000375863 | ENSP00000381031 |
| ENSP00000375881 | ENSP00000379457 |
| ENSP00000375928 | ENSP00000379607 |
| ENSP00000375986 | ENSP00000377047 |
| ENSP00000375986 | ENSP00000380921 |
| ENSP00000375986 | ENSP00000382423 |
| ENSP00000375986 | ENSP00000386456 |
| ENSP00000375986 | ENSP00000397644 |
| ENSP00000375986 | ENSP00000402084 |
| ENSP00000376097 | ENSP00000377969 |
| ENSP00000376103 | ENSP00000418593 |
| ENSP00000376204 | ENSP00000381657 |
| ENSP00000376204 | ENSP00000382688 |
| ENSP00000376204 | ENSP00000396439 |
| ENSP00000376268 | ENSP00000377148 |
| ENSP00000376268 | ENSP00000380982 |
| ENSP00000376268 | ENSP00000388320 |
| ENSP00000376268 | ENSP00000394071 |
| ENSP00000376268 | ENSP00000401435 |
| ENSP00000376268 | ENSP00000419628 |
| ENSP00000376309 | ENSP00000376973 |
| ENSP00000376309 | ENSP00000379607 |
| ENSP00000376309 | ENSP00000400591 |
| ENSP00000376309 | ENSP00000412566 |
| ENSP00000376410 | ENSP00000377793 |
| ENSP00000376410 | ENSP00000380450 |
| ENSP00000376410 | ENSP00000381567 |
| ENSP00000376410 | ENSP00000391249 |
| ENSP00000376410 | ENSP00000397598 |
| ENSP00000376410 | ENSP00000402084 |
| ENSP00000376410 | ENSP00000407879 |

|                 |                 |
|-----------------|-----------------|
| ENSP00000376534 | ENSP00000384490 |
| ENSP00000376534 | ENSP00000397644 |
| ENSP00000376758 | ENSP00000382779 |
| ENSP00000376758 | ENSP00000396152 |
| ENSP00000376758 | ENSP00000399454 |
| ENSP00000376758 | ENSP00000400591 |
| ENSP00000376758 | ENSP00000402869 |
| ENSP00000376758 | ENSP00000405614 |
| ENSP00000376758 | ENSP00000410416 |
| ENSP00000376758 | ENSP00000412566 |
| ENSP00000376827 | ENSP00000389998 |
| ENSP00000376871 | ENSP00000378306 |
| ENSP00000376903 | ENSP00000417281 |
| ENSP00000376945 | ENSP00000417748 |
| ENSP00000376946 | ENSP00000382595 |
| ENSP00000376946 | ENSP00000403852 |
| ENSP00000376946 | ENSP00000412319 |
| ENSP00000376946 | ENSP00000415678 |
| ENSP00000376973 | ENSP00000384573 |
| ENSP00000376973 | ENSP00000386992 |
| ENSP00000376973 | ENSP00000400591 |
| ENSP00000376973 | ENSP00000403345 |
| ENSP00000376973 | ENSP00000406280 |
| ENSP00000376973 | ENSP00000412566 |
| ENSP00000376973 | ENSP00000414006 |
| ENSP00000376973 | ENSP00000414634 |
| ENSP00000376973 | ENSP00000416959 |
| ENSP00000376973 | ENSP00000417451 |
| ENSP00000376973 | ENSP00000420195 |
| ENSP00000377040 | ENSP00000378890 |
| ENSP00000377040 | ENSP00000396152 |
| ENSP00000377040 | ENSP00000410416 |
| ENSP00000377047 | ENSP00000378338 |
| ENSP00000377047 | ENSP00000402084 |
| ENSP00000377148 | ENSP00000377665 |
| ENSP00000377148 | ENSP00000384534 |
| ENSP00000377148 | ENSP00000388340 |
| ENSP00000377218 | ENSP00000378180 |
| ENSP00000377218 | ENSP00000378306 |
| ENSP00000377218 | ENSP00000413152 |
| ENSP00000377262 | ENSP00000377747 |
| ENSP00000377262 | ENSP00000379607 |
| ENSP00000377262 | ENSP00000383059 |
| ENSP00000377262 | ENSP00000387006 |
| ENSP00000377262 | ENSP00000392028 |
| ENSP00000377262 | ENSP00000416959 |

|                 |                 |
|-----------------|-----------------|
| ENSP00000377262 | ENSP00000420195 |
| ENSP00000377280 | ENSP00000388872 |
| ENSP00000377344 | ENSP00000380460 |
| ENSP00000377344 | ENSP00000402338 |
| ENSP00000377401 | ENSP00000379042 |
| ENSP00000377446 | ENSP00000387262 |
| ENSP00000377446 | ENSP00000394382 |
| ENSP00000377486 | ENSP00000377865 |
| ENSP00000377486 | ENSP00000389103 |
| ENSP00000377486 | ENSP00000417602 |
| ENSP00000377496 | ENSP00000407401 |
| ENSP00000377617 | ENSP00000396937 |
| ENSP00000377640 | ENSP00000377865 |
| ENSP00000377640 | ENSP00000378160 |
| ENSP00000377640 | ENSP00000379607 |
| ENSP00000377640 | ENSP00000379888 |
| ENSP00000377640 | ENSP00000380156 |
| ENSP00000377640 | ENSP00000380982 |
| ENSP00000377640 | ENSP00000382392 |
| ENSP00000377640 | ENSP00000386717 |
| ENSP00000377640 | ENSP00000388464 |
| ENSP00000377640 | ENSP00000389103 |
| ENSP00000377640 | ENSP00000393393 |
| ENSP00000377640 | ENSP00000394290 |
| ENSP00000377640 | ENSP00000402338 |
| ENSP00000377640 | ENSP00000403576 |
| ENSP00000377640 | ENSP00000408058 |
| ENSP00000377640 | ENSP00000409074 |
| ENSP00000377640 | ENSP00000409367 |
| ENSP00000377640 | ENSP00000411162 |
| ENSP00000377640 | ENSP00000419740 |
| ENSP00000377655 | ENSP00000382423 |
| ENSP00000377655 | ENSP00000394791 |
| ENSP00000377655 | ENSP00000396704 |
| ENSP00000377665 | ENSP00000381293 |
| ENSP00000377665 | ENSP00000419628 |
| ENSP00000377747 | ENSP00000386759 |
| ENSP00000377769 | ENSP00000397441 |
| ENSP00000377769 | ENSP00000402240 |
| ENSP00000377793 | ENSP00000380921 |
| ENSP00000377793 | ENSP00000382562 |
| ENSP00000377793 | ENSP00000384290 |
| ENSP00000377793 | ENSP00000397351 |
| ENSP00000377793 | ENSP00000412319 |
| ENSP00000377793 | ENSP00000414402 |
| ENSP00000377793 | ENSP00000415678 |

|                 |                 |
|-----------------|-----------------|
| ENSP00000377862 | ENSP00000400223 |
| ENSP00000377865 | ENSP00000378160 |
| ENSP00000377865 | ENSP00000380156 |
| ENSP00000377865 | ENSP00000386156 |
| ENSP00000377865 | ENSP00000386717 |
| ENSP00000377865 | ENSP00000389103 |
| ENSP00000377865 | ENSP00000393393 |
| ENSP00000377865 | ENSP00000396152 |
| ENSP00000377865 | ENSP00000401371 |
| ENSP00000377865 | ENSP00000402338 |
| ENSP00000377865 | ENSP00000408058 |
| ENSP00000377865 | ENSP00000410416 |
| ENSP00000377865 | ENSP00000414321 |
| ENSP00000377865 | ENSP00000417281 |
| ENSP00000377865 | ENSP00000419370 |
| ENSP00000377914 | ENSP00000396152 |
| ENSP00000377914 | ENSP00000410416 |
| ENSP00000377944 | ENSP00000384302 |
| ENSP00000377944 | ENSP00000389065 |
| ENSP00000377944 | ENSP00000402338 |
| ENSP00000377944 | ENSP00000411327 |
| ENSP00000377944 | ENSP00000412553 |
| ENSP00000377944 | ENSP00000413319 |
| ENSP00000377944 | ENSP00000414373 |
| ENSP00000377954 | ENSP00000379607 |
| ENSP00000377954 | ENSP00000380460 |
| ENSP00000377969 | ENSP00000403852 |
| ENSP00000378160 | ENSP00000379607 |
| ENSP00000378160 | ENSP00000380156 |
| ENSP00000378160 | ENSP00000386717 |
| ENSP00000378160 | ENSP00000389103 |
| ENSP00000378160 | ENSP00000393241 |
| ENSP00000378160 | ENSP00000393393 |
| ENSP00000378160 | ENSP00000396152 |
| ENSP00000378160 | ENSP00000402338 |
| ENSP00000378160 | ENSP00000403175 |
| ENSP00000378160 | ENSP00000407401 |
| ENSP00000378160 | ENSP00000408058 |
| ENSP00000378160 | ENSP00000410416 |
| ENSP00000378160 | ENSP00000412583 |
| ENSP00000378160 | ENSP00000416110 |
| ENSP00000378165 | ENSP00000379607 |
| ENSP00000378165 | ENSP00000386759 |
| ENSP00000378180 | ENSP00000392028 |
| ENSP00000378180 | ENSP00000394794 |
| ENSP00000378180 | ENSP00000417281 |

|                 |                 |
|-----------------|-----------------|
| ENSP00000378286 | ENSP00000384597 |
| ENSP00000378306 | ENSP00000379093 |
| ENSP00000378306 | ENSP00000382423 |
| ENSP00000378306 | ENSP00000394071 |
| ENSP00000378338 | ENSP00000388373 |
| ENSP00000378350 | ENSP00000378529 |
| ENSP00000378350 | ENSP00000380921 |
| ENSP00000378350 | ENSP00000386156 |
| ENSP00000378350 | ENSP00000394394 |
| ENSP00000378350 | ENSP00000394869 |
| ENSP00000378350 | ENSP00000396704 |
| ENSP00000378350 | ENSP00000397441 |
| ENSP00000378350 | ENSP00000420405 |
| ENSP00000378368 | ENSP00000380460 |
| ENSP00000378368 | ENSP00000414920 |
| ENSP00000378394 | ENSP00000381045 |
| ENSP00000378529 | ENSP00000382562 |
| ENSP00000378529 | ENSP00000384302 |
| ENSP00000378529 | ENSP00000394394 |
| ENSP00000378529 | ENSP00000396937 |
| ENSP00000378529 | ENSP00000402084 |
| ENSP00000378529 | ENSP00000402515 |
| ENSP00000378529 | ENSP00000403293 |
| ENSP00000378605 | ENSP00000398597 |
| ENSP00000378624 | ENSP00000386878 |
| ENSP00000378723 | ENSP00000390020 |
| ENSP00000378723 | ENSP00000417281 |
| ENSP00000378736 | ENSP00000403852 |
| ENSP00000378782 | ENSP00000401508 |
| ENSP00000378851 | ENSP00000381031 |
| ENSP00000378851 | ENSP00000417764 |
| ENSP00000379003 | ENSP00000384048 |
| ENSP00000379042 | ENSP00000401445 |
| ENSP00000379065 | ENSP00000392466 |
| ENSP00000379065 | ENSP00000396620 |
| ENSP00000379093 | ENSP00000383402 |
| ENSP00000379093 | ENSP00000384675 |
| ENSP00000379144 | ENSP00000381216 |
| ENSP00000379158 | ENSP00000379607 |
| ENSP00000379158 | ENSP00000388373 |
| ENSP00000379217 | ENSP00000380460 |
| ENSP00000379217 | ENSP00000384211 |
| ENSP00000379228 | ENSP00000383719 |
| ENSP00000379228 | ENSP00000398789 |
| ENSP00000379282 | ENSP00000381237 |
| ENSP00000379339 | ENSP00000379607 |

|                 |                 |
|-----------------|-----------------|
| ENSP00000379339 | ENSP00000379888 |
| ENSP00000379339 | ENSP00000384302 |
| ENSP00000379339 | ENSP00000393241 |
| ENSP00000379339 | ENSP00000403175 |
| ENSP00000379339 | ENSP00000412583 |
| ENSP00000379339 | ENSP00000414321 |
| ENSP00000379339 | ENSP00000416110 |
| ENSP00000379372 | ENSP00000384597 |
| ENSP00000379372 | ENSP00000393286 |
| ENSP00000379372 | ENSP00000393870 |
| ENSP00000379372 | ENSP00000400104 |
| ENSP00000379372 | ENSP00000402590 |
| ENSP00000379383 | ENSP00000393887 |
| ENSP00000379383 | ENSP00000398350 |
| ENSP00000379394 | ENSP00000382064 |
| ENSP00000379394 | ENSP00000384792 |
| ENSP00000379394 | ENSP00000386520 |
| ENSP00000379394 | ENSP00000388872 |
| ENSP00000379430 | ENSP00000387019 |
| ENSP00000379441 | ENSP00000417281 |
| ENSP00000379457 | ENSP00000380460 |
| ENSP00000379500 | ENSP00000386722 |
| ENSP00000379607 | ENSP00000379888 |
| ENSP00000379607 | ENSP00000379933 |
| ENSP00000379607 | ENSP00000380156 |
| ENSP00000379607 | ENSP00000380336 |
| ENSP00000379607 | ENSP00000380969 |
| ENSP00000379607 | ENSP00000381031 |
| ENSP00000379607 | ENSP00000381036 |
| ENSP00000379607 | ENSP00000381216 |
| ENSP00000379607 | ENSP00000381863 |
| ENSP00000379607 | ENSP00000382392 |
| ENSP00000379607 | ENSP00000382595 |
| ENSP00000379607 | ENSP00000383623 |
| ENSP00000379607 | ENSP00000383873 |
| ENSP00000379607 | ENSP00000384408 |
| ENSP00000379607 | ENSP00000386156 |
| ENSP00000379607 | ENSP00000386717 |
| ENSP00000379607 | ENSP00000388340 |
| ENSP00000379607 | ENSP00000389103 |
| ENSP00000379607 | ENSP00000391944 |
| ENSP00000379607 | ENSP00000392270 |
| ENSP00000379607 | ENSP00000392601 |
| ENSP00000379607 | ENSP00000393393 |
| ENSP00000379607 | ENSP00000397394 |
| ENSP00000379607 | ENSP00000398597 |



|                 |                 |
|-----------------|-----------------|
| ENSP00000379607 | ENSP00000400591 |
| ENSP00000379607 | ENSP00000402338 |
| ENSP00000379607 | ENSP00000404121 |
| ENSP00000379607 | ENSP00000408910 |
| ENSP00000379607 | ENSP00000412566 |
| ENSP00000379607 | ENSP00000414321 |
| ENSP00000379607 | ENSP00000416959 |
| ENSP00000379607 | ENSP00000418210 |
| ENSP00000379607 | ENSP00000420195 |
| ENSP00000379654 | ENSP00000380054 |
| ENSP00000379709 | ENSP00000386878 |
| ENSP00000379712 | ENSP00000388872 |
| ENSP00000379836 | ENSP00000391735 |
| ENSP00000379836 | ENSP00000414145 |
| ENSP00000379865 | ENSP00000380504 |
| ENSP00000379888 | ENSP00000384302 |
| ENSP00000379888 | ENSP00000389103 |
| ENSP00000379888 | ENSP00000392859 |
| ENSP00000379888 | ENSP00000393241 |
| ENSP00000379888 | ENSP00000394290 |
| ENSP00000379888 | ENSP00000402338 |
| ENSP00000379888 | ENSP00000403175 |
| ENSP00000379888 | ENSP00000403576 |
| ENSP00000379888 | ENSP00000409074 |
| ENSP00000379888 | ENSP00000409367 |
| ENSP00000379888 | ENSP00000411162 |
| ENSP00000379888 | ENSP00000412583 |
| ENSP00000379888 | ENSP00000414321 |
| ENSP00000379888 | ENSP00000416110 |
| ENSP00000379888 | ENSP00000417229 |
| ENSP00000379888 | ENSP00000420714 |
| ENSP00000379908 | ENSP00000386722 |
| ENSP00000379908 | ENSP00000389934 |
| ENSP00000379933 | ENSP00000393241 |
| ENSP00000379933 | ENSP00000403175 |
| ENSP00000379933 | ENSP00000416110 |
| ENSP00000379946 | ENSP00000396620 |
| ENSP00000380150 | ENSP00000382064 |
| ENSP00000380156 | ENSP00000386717 |
| ENSP00000380156 | ENSP00000389103 |
| ENSP00000380156 | ENSP00000391723 |
| ENSP00000380156 | ENSP00000393393 |
| ENSP00000380156 | ENSP00000402338 |
| ENSP00000380156 | ENSP00000414321 |
| ENSP00000380271 | ENSP00000403852 |
| ENSP00000380336 | ENSP00000384109 |

|                 |                 |
|-----------------|-----------------|
| ENSP00000380336 | ENSP00000396301 |
| ENSP00000380431 | ENSP00000386394 |
| ENSP00000380450 | ENSP00000381293 |
| ENSP00000380450 | ENSP00000382423 |
| ENSP00000380450 | ENSP00000386878 |
| ENSP00000380450 | ENSP00000397351 |
| ENSP00000380450 | ENSP00000402084 |
| ENSP00000380460 | ENSP00000380504 |
| ENSP00000380460 | ENSP00000381863 |
| ENSP00000380460 | ENSP00000386134 |
| ENSP00000380460 | ENSP00000386992 |
| ENSP00000380460 | ENSP00000394400 |
| ENSP00000380460 | ENSP00000399530 |
| ENSP00000380460 | ENSP00000400626 |
| ENSP00000380460 | ENSP00000401445 |
| ENSP00000380460 | ENSP00000402240 |
| ENSP00000380460 | ENSP00000412310 |
| ENSP00000380467 | ENSP00000396452 |
| ENSP00000380495 | ENSP00000380982 |
| ENSP00000380495 | ENSP00000402338 |
| ENSP00000380504 | ENSP00000383503 |
| ENSP00000380504 | ENSP00000397636 |
| ENSP00000380504 | ENSP00000403852 |
| ENSP00000380504 | ENSP00000405636 |
| ENSP00000380504 | ENSP00000410530 |
| ENSP00000380504 | ENSP00000410954 |
| ENSP00000380504 | ENSP00000414110 |
| ENSP00000380504 | ENSP00000416599 |
| ENSP00000380504 | ENSP00000420588 |
| ENSP00000380531 | ENSP00000383142 |
| ENSP00000380702 | ENSP00000409279 |
| ENSP00000380793 | ENSP00000401445 |
| ENSP00000380793 | ENSP00000417764 |
| ENSP00000380921 | ENSP00000383851 |
| ENSP00000380921 | ENSP00000384675 |
| ENSP00000380921 | ENSP00000390590 |
| ENSP00000380921 | ENSP00000391249 |
| ENSP00000380921 | ENSP00000394394 |
| ENSP00000380982 | ENSP00000382392 |
| ENSP00000380982 | ENSP00000382779 |
| ENSP00000380982 | ENSP00000388464 |
| ENSP00000380982 | ENSP00000389103 |
| ENSP00000380982 | ENSP00000394290 |
| ENSP00000380982 | ENSP00000402338 |
| ENSP00000380982 | ENSP00000403576 |
| ENSP00000380982 | ENSP00000409074 |

|                 |                 |
|-----------------|-----------------|
| ENSP00000380982 | ENSP00000409367 |
| ENSP00000380982 | ENSP00000411162 |
| ENSP00000380982 | ENSP00000412922 |
| ENSP00000380982 | ENSP00000413152 |
| ENSP00000380982 | ENSP00000419740 |
| ENSP00000381003 | ENSP00000404381 |
| ENSP00000381031 | ENSP00000381237 |
| ENSP00000381031 | ENSP00000386239 |
| ENSP00000381031 | ENSP00000386717 |
| ENSP00000381031 | ENSP00000387477 |
| ENSP00000381031 | ENSP00000391774 |
| ENSP00000381031 | ENSP00000395535 |
| ENSP00000381031 | ENSP00000397790 |
| ENSP00000381031 | ENSP00000398494 |
| ENSP00000381031 | ENSP00000401566 |
| ENSP00000381031 | ENSP00000414187 |
| ENSP00000381031 | ENSP00000415703 |
| ENSP00000381031 | ENSP00000419740 |
| ENSP00000381045 | ENSP00000382390 |
| ENSP00000381045 | ENSP00000386878 |
| ENSP00000381064 | ENSP00000385722 |
| ENSP00000381064 | ENSP00000398208 |
| ENSP00000381064 | ENSP00000414237 |
| ENSP00000381098 | ENSP00000381698 |
| ENSP00000381216 | ENSP00000387911 |
| ENSP00000381216 | ENSP00000391774 |
| ENSP00000381216 | ENSP00000392617 |
| ENSP00000381216 | ENSP00000418734 |
| ENSP00000381237 | ENSP00000390158 |
| ENSP00000381293 | ENSP00000390783 |
| ENSP00000381293 | ENSP00000396937 |
| ENSP00000381293 | ENSP00000411286 |
| ENSP00000381293 | ENSP00000415203 |
| ENSP00000381567 | ENSP00000382177 |
| ENSP00000381567 | ENSP00000382492 |
| ENSP00000381567 | ENSP00000397351 |
| ENSP00000381631 | ENSP00000386722 |
| ENSP00000381657 | ENSP00000384048 |
| ENSP00000381657 | ENSP00000386759 |
| ENSP00000381657 | ENSP00000387429 |
| ENSP00000381657 | ENSP00000396484 |
| ENSP00000381657 | ENSP00000404318 |
| ENSP00000381657 | ENSP00000409167 |
| ENSP00000381657 | ENSP00000413152 |
| ENSP00000381657 | ENSP00000415212 |
| ENSP00000381657 | ENSP00000416511 |

|                 |                 |
|-----------------|-----------------|
| ENSP00000381698 | ENSP00000386165 |
| ENSP00000381793 | ENSP00000387170 |
| ENSP00000381795 | ENSP00000420405 |
| ENSP00000381840 | ENSP00000386165 |
| ENSP00000381840 | ENSP00000404658 |
| ENSP00000381863 | ENSP00000382390 |
| ENSP00000381863 | ENSP00000394382 |
| ENSP00000381863 | ENSP00000407487 |
| ENSP00000381891 | ENSP00000396439 |
| ENSP00000381891 | ENSP00000396937 |
| ENSP00000381932 | ENSP00000382423 |
| ENSP00000381970 | ENSP00000391774 |
| ENSP00000382064 | ENSP00000386439 |
| ENSP00000382177 | ENSP00000389934 |
| ENSP00000382177 | ENSP00000407487 |
| ENSP00000382177 | ENSP00000414402 |
| ENSP00000382271 | ENSP00000386621 |
| ENSP00000382392 | ENSP00000389103 |
| ENSP00000382392 | ENSP00000394290 |
| ENSP00000382392 | ENSP00000402338 |
| ENSP00000382392 | ENSP00000403576 |
| ENSP00000382392 | ENSP00000409074 |
| ENSP00000382392 | ENSP00000409367 |
| ENSP00000382392 | ENSP00000411162 |
| ENSP00000382392 | ENSP00000420357 |
| ENSP00000382423 | ENSP00000382562 |
| ENSP00000382423 | ENSP00000394071 |
| ENSP00000382492 | ENSP00000383145 |
| ENSP00000382492 | ENSP00000389934 |
| ENSP00000382492 | ENSP00000407487 |
| ENSP00000382562 | ENSP00000383145 |
| ENSP00000382562 | ENSP00000386200 |
| ENSP00000382562 | ENSP00000410818 |
| ENSP00000382562 | ENSP00000412319 |
| ENSP00000382562 | ENSP00000415678 |
| ENSP00000382595 | ENSP00000386394 |
| ENSP00000382595 | ENSP00000392859 |
| ENSP00000382595 | ENSP00000394869 |
| ENSP00000382779 | ENSP00000387019 |
| ENSP00000382779 | ENSP00000397259 |
| ENSP00000382779 | ENSP00000412566 |
| ENSP00000383059 | ENSP00000389649 |
| ENSP00000383059 | ENSP00000391944 |
| ENSP00000383142 | ENSP00000397790 |
| ENSP00000383503 | ENSP00000386134 |
| ENSP00000383503 | ENSP00000403852 |

|                 |                 |
|-----------------|-----------------|
| ENSP00000383623 | ENSP00000418070 |
| ENSP00000383719 | ENSP00000390783 |
| ENSP00000383719 | ENSP00000396152 |
| ENSP00000383719 | ENSP00000410416 |
| ENSP00000384048 | ENSP00000391774 |
| ENSP00000384048 | ENSP00000392617 |
| ENSP00000384048 | ENSP00000396704 |
| ENSP00000384048 | ENSP00000400806 |
| ENSP00000384048 | ENSP00000414321 |
| ENSP00000384053 | ENSP00000409346 |
| ENSP00000384109 | ENSP00000398930 |
| ENSP00000384109 | ENSP00000408994 |
| ENSP00000384109 | ENSP00000417980 |
| ENSP00000384198 | ENSP00000391457 |
| ENSP00000384198 | ENSP00000400476 |
| ENSP00000384211 | ENSP00000386212 |
| ENSP00000384211 | ENSP00000396937 |
| ENSP00000384211 | ENSP00000406490 |
| ENSP00000384211 | ENSP00000418734 |
| ENSP00000384302 | ENSP00000387006 |
| ENSP00000384302 | ENSP00000399454 |
| ENSP00000384302 | ENSP00000402869 |
| ENSP00000384302 | ENSP00000405614 |
| ENSP00000384302 | ENSP00000410396 |
| ENSP00000384313 | ENSP00000392617 |
| ENSP00000384391 | ENSP00000386394 |
| ENSP00000384391 | ENSP00000388920 |
| ENSP00000384434 | ENSP00000396620 |
| ENSP00000384434 | ENSP00000417980 |
| ENSP00000384474 | ENSP00000385903 |
| ENSP00000384474 | ENSP00000392617 |
| ENSP00000384474 | ENSP00000417763 |
| ENSP00000384490 | ENSP00000396439 |
| ENSP00000384490 | ENSP00000404121 |
| ENSP00000384490 | ENSP00000418734 |
| ENSP00000384490 | ENSP00000419786 |
| ENSP00000384523 | ENSP00000417281 |
| ENSP00000384573 | ENSP00000391723 |
| ENSP00000384573 | ENSP00000408910 |
| ENSP00000384675 | ENSP00000386259 |
| ENSP00000384675 | ENSP00000399511 |
| ENSP00000385722 | ENSP00000398208 |
| ENSP00000385722 | ENSP00000414237 |
| ENSP00000385722 | ENSP00000418210 |
| ENSP00000385903 | ENSP00000417763 |
| ENSP00000386121 | ENSP00000390475 |

|                 |                 |
|-----------------|-----------------|
| ENSP00000386134 | ENSP00000394869 |
| ENSP00000386134 | ENSP00000397636 |
| ENSP00000386134 | ENSP00000401371 |
| ENSP00000386134 | ENSP00000402338 |
| ENSP00000386134 | ENSP00000405636 |
| ENSP00000386134 | ENSP00000406293 |
| ENSP00000386134 | ENSP00000410530 |
| ENSP00000386134 | ENSP00000410954 |
| ENSP00000386134 | ENSP00000414110 |
| ENSP00000386134 | ENSP00000416599 |
| ENSP00000386156 | ENSP00000394394 |
| ENSP00000386161 | ENSP00000391774 |
| ENSP00000386212 | ENSP00000396937 |
| ENSP00000386212 | ENSP00000418734 |
| ENSP00000386227 | ENSP00000388330 |
| ENSP00000386227 | ENSP00000393953 |
| ENSP00000386227 | ENSP00000417763 |
| ENSP00000386394 | ENSP00000420405 |
| ENSP00000386456 | ENSP00000396937 |
| ENSP00000386520 | ENSP00000395535 |
| ENSP00000386621 | ENSP00000389399 |
| ENSP00000386621 | ENSP00000402084 |
| ENSP00000386717 | ENSP00000389103 |
| ENSP00000386717 | ENSP00000391723 |
| ENSP00000386717 | ENSP00000393393 |
| ENSP00000386717 | ENSP00000402338 |
| ENSP00000386717 | ENSP00000409275 |
| ENSP00000386717 | ENSP00000414321 |
| ENSP00000386722 | ENSP00000394085 |
| ENSP00000386722 | ENSP00000408910 |
| ENSP00000386722 | ENSP00000417132 |
| ENSP00000386759 | ENSP00000390475 |
| ENSP00000386759 | ENSP00000392028 |
| ENSP00000386759 | ENSP00000397644 |
| ENSP00000386759 | ENSP00000402338 |
| ENSP00000386759 | ENSP00000402515 |
| ENSP00000386759 | ENSP00000406293 |
| ENSP00000386759 | ENSP00000417980 |
| ENSP00000386878 | ENSP00000407487 |
| ENSP00000386878 | ENSP00000413625 |
| ENSP00000386918 | ENSP00000401445 |
| ENSP00000387006 | ENSP00000393953 |
| ENSP00000387006 | ENSP00000407964 |
| ENSP00000387006 | ENSP00000410758 |
| ENSP00000387006 | ENSP00000412566 |
| ENSP00000387006 | ENSP00000417229 |

|                 |                 |
|-----------------|-----------------|
| ENSP00000387170 | ENSP00000402240 |
| ENSP00000387170 | ENSP00000410758 |
| ENSP00000387170 | ENSP00000412566 |
| ENSP00000387219 | ENSP00000387262 |
| ENSP00000387262 | ENSP00000387477 |
| ENSP00000387262 | ENSP00000392985 |
| ENSP00000387262 | ENSP00000394382 |
| ENSP00000387262 | ENSP00000401445 |
| ENSP00000387262 | ENSP00000415363 |
| ENSP00000387262 | ENSP00000420588 |
| ENSP00000387266 | ENSP00000393275 |
| ENSP00000387429 | ENSP00000396704 |
| ENSP00000387429 | ENSP00000400806 |
| ENSP00000387593 | ENSP00000399511 |
| ENSP00000388320 | ENSP00000412922 |
| ENSP00000388464 | ENSP00000401508 |
| ENSP00000388464 | ENSP00000402338 |
| ENSP00000388872 | ENSP00000408236 |
| ENSP00000389065 | ENSP00000391944 |
| ENSP00000389103 | ENSP00000391723 |
| ENSP00000389103 | ENSP00000393241 |
| ENSP00000389103 | ENSP00000393393 |
| ENSP00000389103 | ENSP00000394290 |
| ENSP00000389103 | ENSP00000402338 |
| ENSP00000389103 | ENSP00000403175 |
| ENSP00000389103 | ENSP00000403576 |
| ENSP00000389103 | ENSP00000403817 |
| ENSP00000389103 | ENSP00000409074 |
| ENSP00000389103 | ENSP00000409367 |
| ENSP00000389103 | ENSP00000411162 |
| ENSP00000389103 | ENSP00000412583 |
| ENSP00000389103 | ENSP00000414321 |
| ENSP00000389103 | ENSP00000416110 |
| ENSP00000389182 | ENSP00000403833 |
| ENSP00000389649 | ENSP00000391944 |
| ENSP00000389649 | ENSP00000392330 |
| ENSP00000389709 | ENSP00000394649 |
| ENSP00000389709 | ENSP00000397830 |
| ENSP00000389709 | ENSP00000406868 |
| ENSP00000389934 | ENSP00000390783 |
| ENSP00000389934 | ENSP00000394071 |
| ENSP00000389934 | ENSP00000394382 |
| ENSP00000389934 | ENSP00000402698 |
| ENSP00000389934 | ENSP00000411197 |
| ENSP00000390783 | ENSP00000397441 |
| ENSP00000390783 | ENSP00000401435 |

|                 |                 |
|-----------------|-----------------|
| ENSP00000390783 | ENSP00000402240 |
| ENSP00000390831 | ENSP00000402698 |
| ENSP00000391197 | ENSP00000402698 |
| ENSP00000391249 | ENSP00000397351 |
| ENSP00000391249 | ENSP00000407879 |
| ENSP00000391249 | ENSP00000409275 |
| ENSP00000391457 | ENSP00000400476 |
| ENSP00000391685 | ENSP00000398677 |
| ENSP00000391723 | ENSP00000393275 |
| ENSP00000391723 | ENSP00000394056 |
| ENSP00000391723 | ENSP00000401371 |
| ENSP00000391723 | ENSP00000403557 |
| ENSP00000391723 | ENSP00000407981 |
| ENSP00000391723 | ENSP00000411038 |
| ENSP00000391723 | ENSP00000412297 |
| ENSP00000391723 | ENSP00000414321 |
| ENSP00000391723 | ENSP00000414808 |
| ENSP00000391774 | ENSP00000392617 |
| ENSP00000391774 | ENSP00000418734 |
| ENSP00000391898 | ENSP00000409279 |
| ENSP00000391944 | ENSP00000397009 |
| ENSP00000391944 | ENSP00000401121 |
| ENSP00000391944 | ENSP00000403359 |
| ENSP00000391944 | ENSP00000403817 |
| ENSP00000391944 | ENSP00000411327 |
| ENSP00000391944 | ENSP00000412553 |
| ENSP00000391944 | ENSP00000413319 |
| ENSP00000391944 | ENSP00000414373 |
| ENSP00000392028 | ENSP00000392617 |
| ENSP00000392028 | ENSP00000401121 |
| ENSP00000392270 | ENSP00000400591 |
| ENSP00000392270 | ENSP00000412566 |
| ENSP00000392330 | ENSP00000399511 |
| ENSP00000392617 | ENSP00000420357 |
| ENSP00000393241 | ENSP00000393393 |
| ENSP00000393241 | ENSP00000414321 |
| ENSP00000393241 | ENSP00000420714 |
| ENSP00000393393 | ENSP00000402338 |
| ENSP00000393393 | ENSP00000403175 |
| ENSP00000393393 | ENSP00000412583 |
| ENSP00000393393 | ENSP00000414321 |
| ENSP00000393393 | ENSP00000416110 |
| ENSP00000393860 | ENSP00000394794 |
| ENSP00000394085 | ENSP00000410626 |
| ENSP00000394290 | ENSP00000402338 |
| ENSP00000394290 | ENSP00000419740 |



|                 |                 |
|-----------------|-----------------|
| ENSP00000394316 | ENSP00000417132 |
| ENSP00000394394 | ENSP00000417132 |
| ENSP00000394400 | ENSP00000402338 |
| ENSP00000394791 | ENSP00000396704 |
| ENSP00000394791 | ENSP00000402527 |
| ENSP00000394791 | ENSP00000417281 |
| ENSP00000395102 | ENSP00000410481 |
| ENSP00000395574 | ENSP00000420405 |
| ENSP00000395701 | ENSP00000402316 |
| ENSP00000396068 | ENSP00000417085 |
| ENSP00000396103 | ENSP00000399511 |
| ENSP00000396439 | ENSP00000417132 |
| ENSP00000396439 | ENSP00000419494 |
| ENSP00000396484 | ENSP00000400806 |
| ENSP00000396620 | ENSP00000396749 |
| ENSP00000396620 | ENSP00000400312 |
| ENSP00000396620 | ENSP00000403397 |
| ENSP00000396704 | ENSP00000402527 |
| ENSP00000396704 | ENSP00000403817 |
| ENSP00000396704 | ENSP00000404318 |
| ENSP00000396704 | ENSP00000409167 |
| ENSP00000396876 | ENSP00000417281 |
| ENSP00000396937 | ENSP00000401508 |
| ENSP00000396937 | ENSP00000413632 |
| ENSP00000397351 | ENSP00000397598 |
| ENSP00000397351 | ENSP00000402084 |
| ENSP00000397351 | ENSP00000407879 |
| ENSP00000397435 | ENSP00000420608 |
| ENSP00000397441 | ENSP00000402240 |
| ENSP00000397441 | ENSP00000406988 |
| ENSP00000397441 | ENSP00000409952 |
| ENSP00000397441 | ENSP00000415203 |
| ENSP00000397598 | ENSP00000407879 |
| ENSP00000397636 | ENSP00000403852 |
| ENSP00000398597 | ENSP00000403345 |
| ENSP00000398597 | ENSP00000406280 |
| ENSP00000398597 | ENSP00000414006 |
| ENSP00000398597 | ENSP00000414634 |
| ENSP00000399454 | ENSP00000410396 |
| ENSP00000399511 | ENSP00000420588 |
| ENSP00000399511 | ENSP00000420608 |
| ENSP00000399530 | ENSP00000402338 |
| ENSP00000400591 | ENSP00000410758 |
| ENSP00000400591 | ENSP00000412566 |
| ENSP00000400591 | ENSP00000414006 |
| ENSP00000400591 | ENSP00000414634 |

|                 |                 |
|-----------------|-----------------|
| ENSP00000400591 | ENSP00000416959 |
| ENSP00000400591 | ENSP00000420195 |
| ENSP00000400626 | ENSP00000402338 |
| ENSP00000400806 | ENSP00000404318 |
| ENSP00000400806 | ENSP00000409167 |
| ENSP00000400806 | ENSP00000415212 |
| ENSP00000400806 | ENSP00000416511 |
| ENSP00000401435 | ENSP00000406988 |
| ENSP00000401445 | ENSP00000415203 |
| ENSP00000401508 | ENSP00000418734 |
| ENSP00000402084 | ENSP00000402515 |
| ENSP00000402084 | ENSP00000417963 |
| ENSP00000402240 | ENSP00000415203 |
| ENSP00000402338 | ENSP00000403576 |
| ENSP00000402338 | ENSP00000403817 |
| ENSP00000402338 | ENSP00000409074 |
| ENSP00000402338 | ENSP00000409367 |
| ENSP00000402338 | ENSP00000411162 |
| ENSP00000402338 | ENSP00000412310 |
| ENSP00000402338 | ENSP00000413152 |
| ENSP00000402338 | ENSP00000414321 |
| ENSP00000402338 | ENSP00000419740 |
| ENSP00000402698 | ENSP00000404016 |
| ENSP00000402698 | ENSP00000406988 |
| ENSP00000402698 | ENSP00000409952 |
| ENSP00000402869 | ENSP00000410396 |
| ENSP00000403175 | ENSP00000414321 |
| ENSP00000403175 | ENSP00000420714 |
| ENSP00000403397 | ENSP00000414786 |
| ENSP00000403576 | ENSP00000419740 |
| ENSP00000403817 | ENSP00000417281 |
| ENSP00000403817 | ENSP00000417686 |
| ENSP00000403852 | ENSP00000405636 |
| ENSP00000403852 | ENSP00000410530 |
| ENSP00000403852 | ENSP00000410954 |
| ENSP00000403852 | ENSP00000414110 |
| ENSP00000403852 | ENSP00000416599 |
| ENSP00000405614 | ENSP00000410396 |
| ENSP00000407181 | ENSP00000407310 |
| ENSP00000407487 | ENSP00000407879 |
| ENSP00000408020 | ENSP00000417963 |
| ENSP00000408910 | ENSP00000414906 |
| ENSP00000409016 | ENSP00000417281 |
| ENSP00000409074 | ENSP00000419740 |
| ENSP00000409167 | ENSP00000417281 |
| ENSP00000409275 | ENSP00000417963 |

|                 |                 |
|-----------------|-----------------|
| ENSP00000409367 | ENSP00000419740 |
| ENSP00000410758 | ENSP00000412566 |
| ENSP00000411162 | ENSP00000419740 |
| ENSP00000412566 | ENSP00000416959 |
| ENSP00000412583 | ENSP00000414321 |
| ENSP00000412583 | ENSP00000420714 |
| ENSP00000413520 | ENSP00000415434 |
| ENSP00000414187 | ENSP00000416959 |
| ENSP00000414321 | ENSP00000416110 |
| ENSP00000414321 | ENSP00000420714 |
| ENSP00000416110 | ENSP00000420714 |
| ENSP00000416583 | ENSP00000417763 |
| ENSP00000417132 | ENSP00000419494 |
| ENSP00000417281 | ENSP00000417980 |
| ENSP00000417281 | ENSP00000419494 |
| ENSP00000417748 | ENSP00000418734 |
